# Supplementary material for: Molecular Biological Methods to Assess Different Botrytis cinerea Strains on Grapes
Source: MDPI journal article supplement (doi:10.3390/microbiolres15020037), 2024-04-19

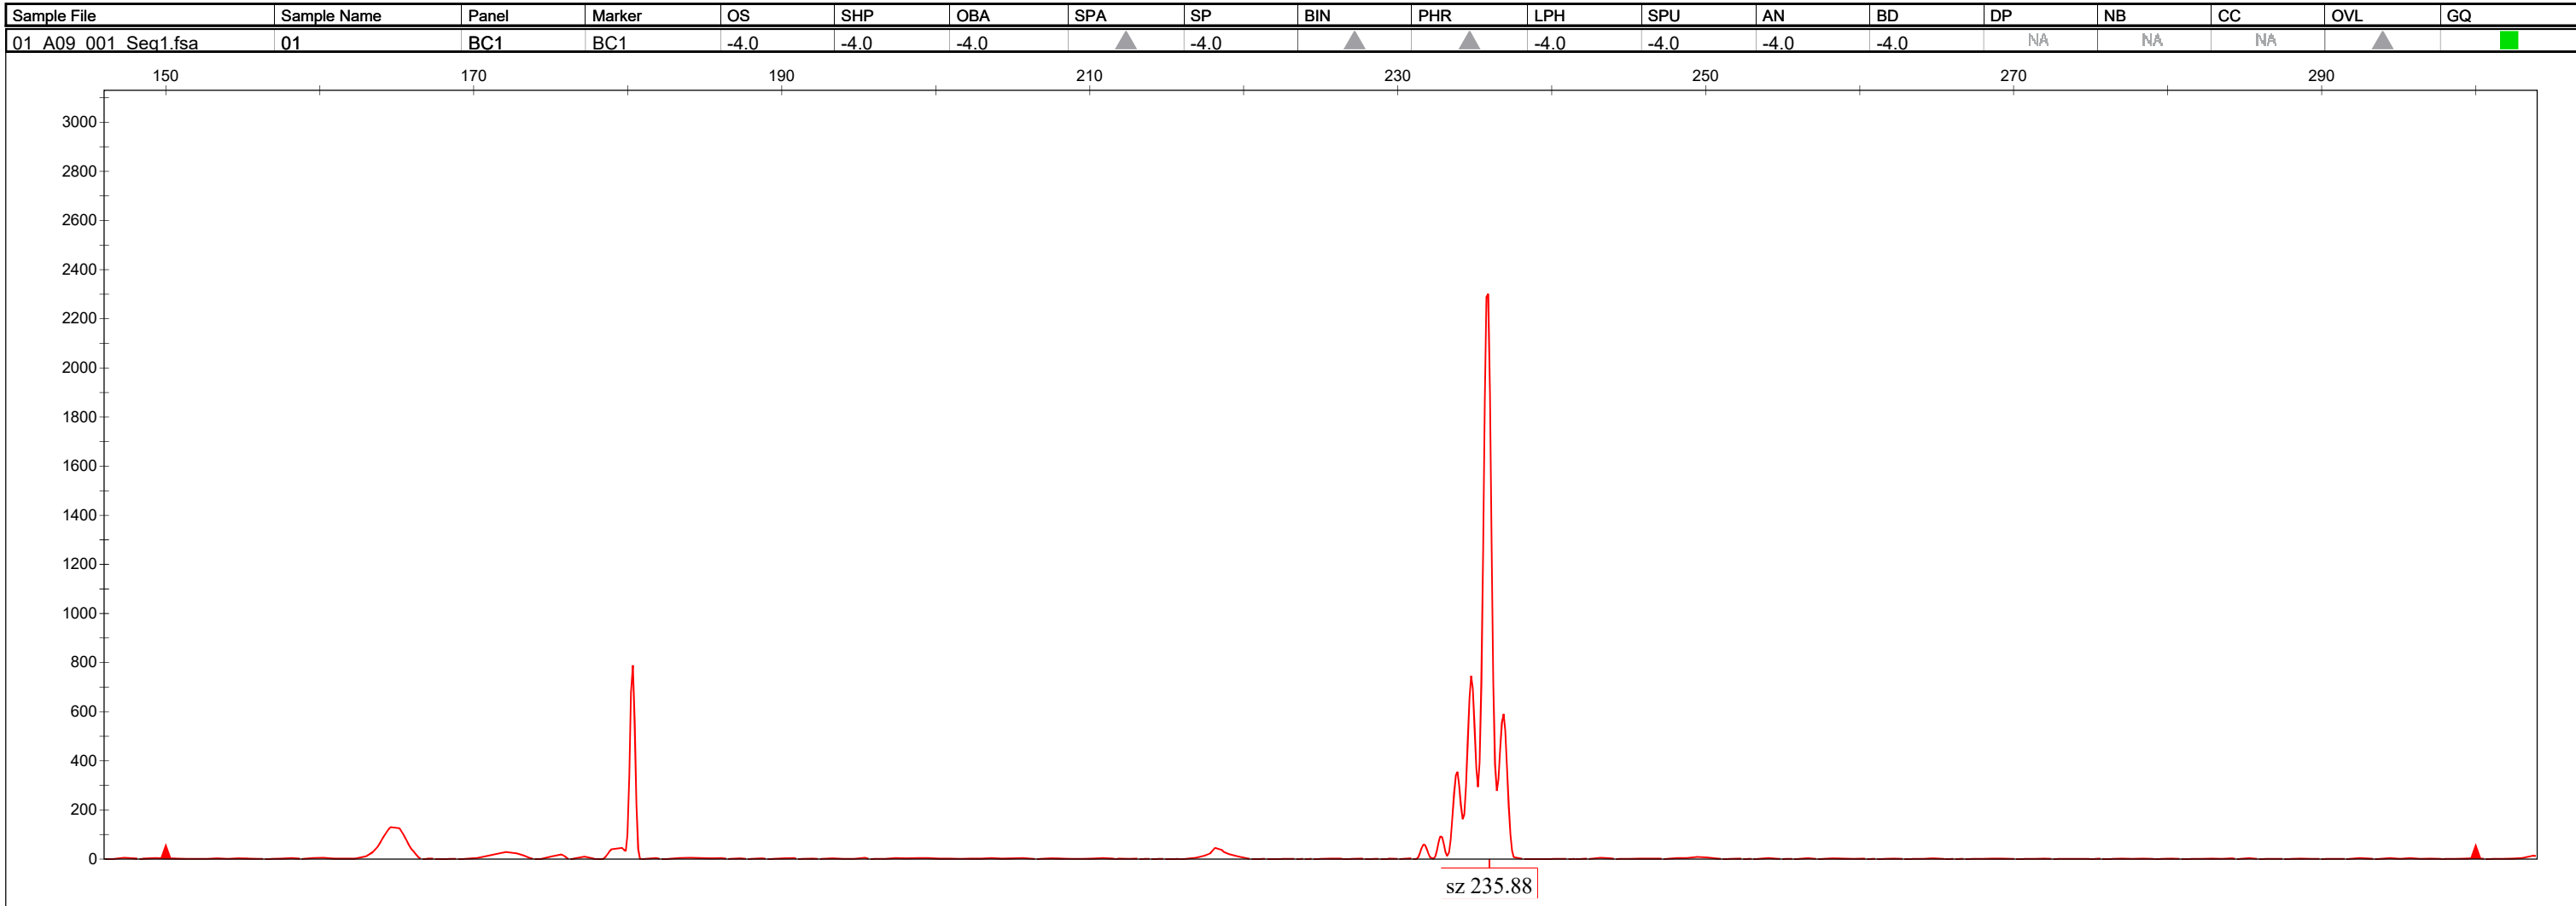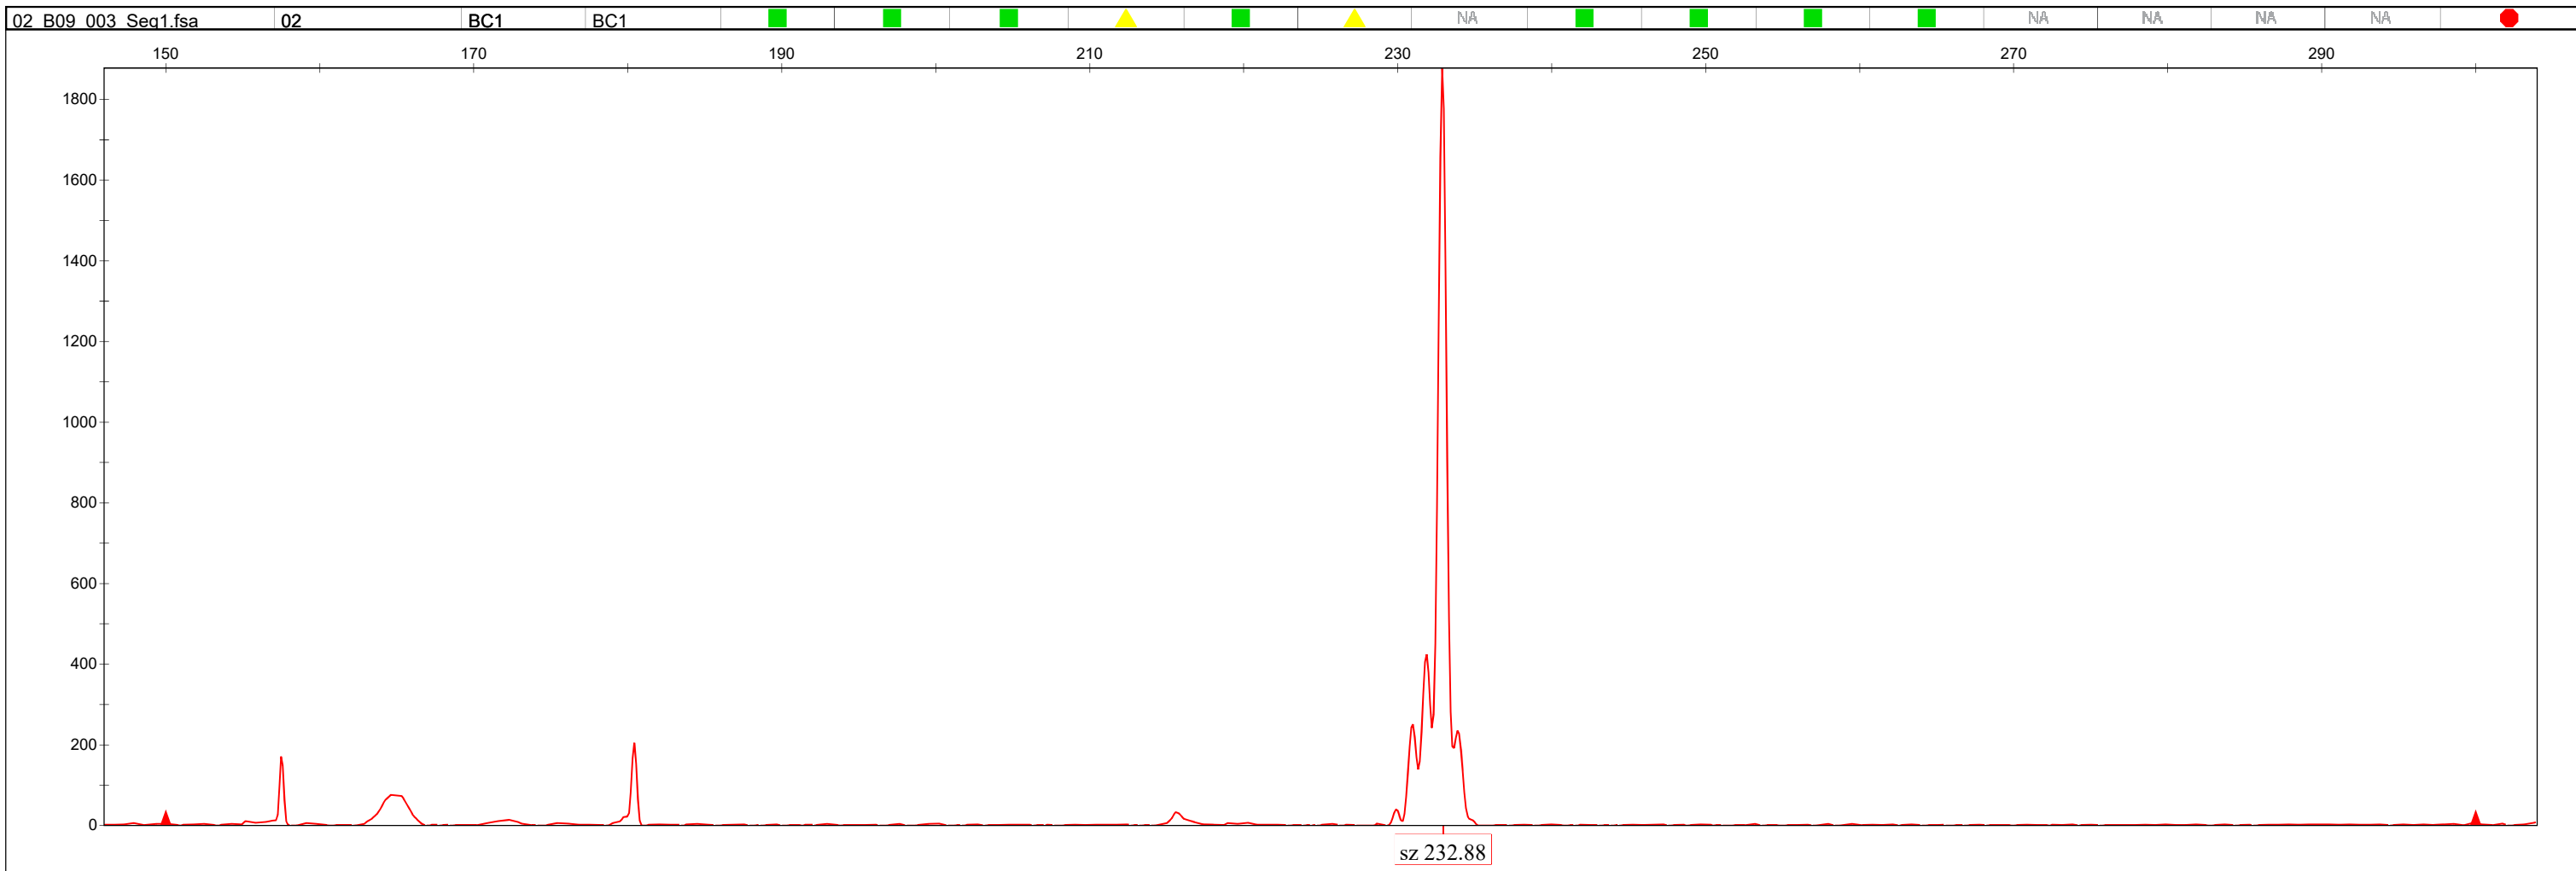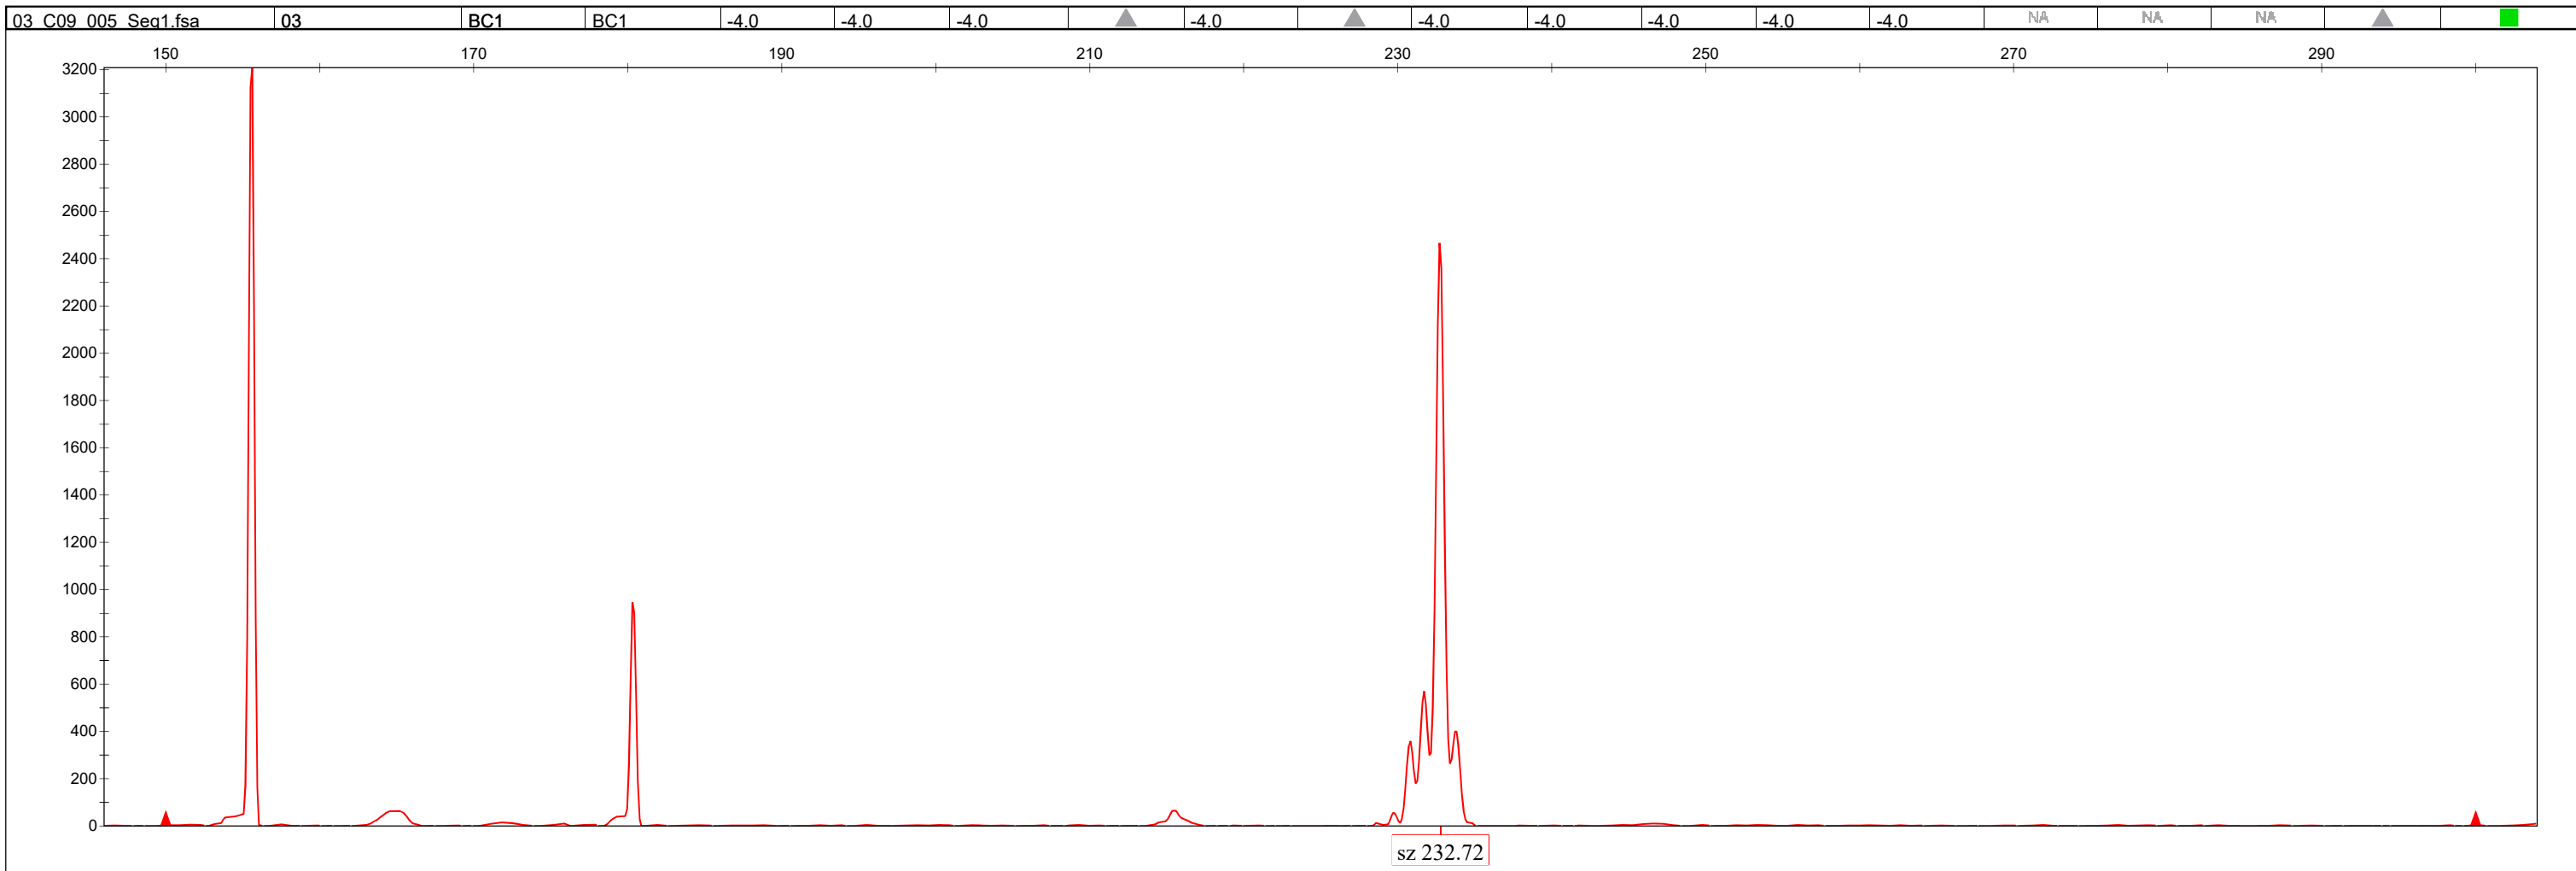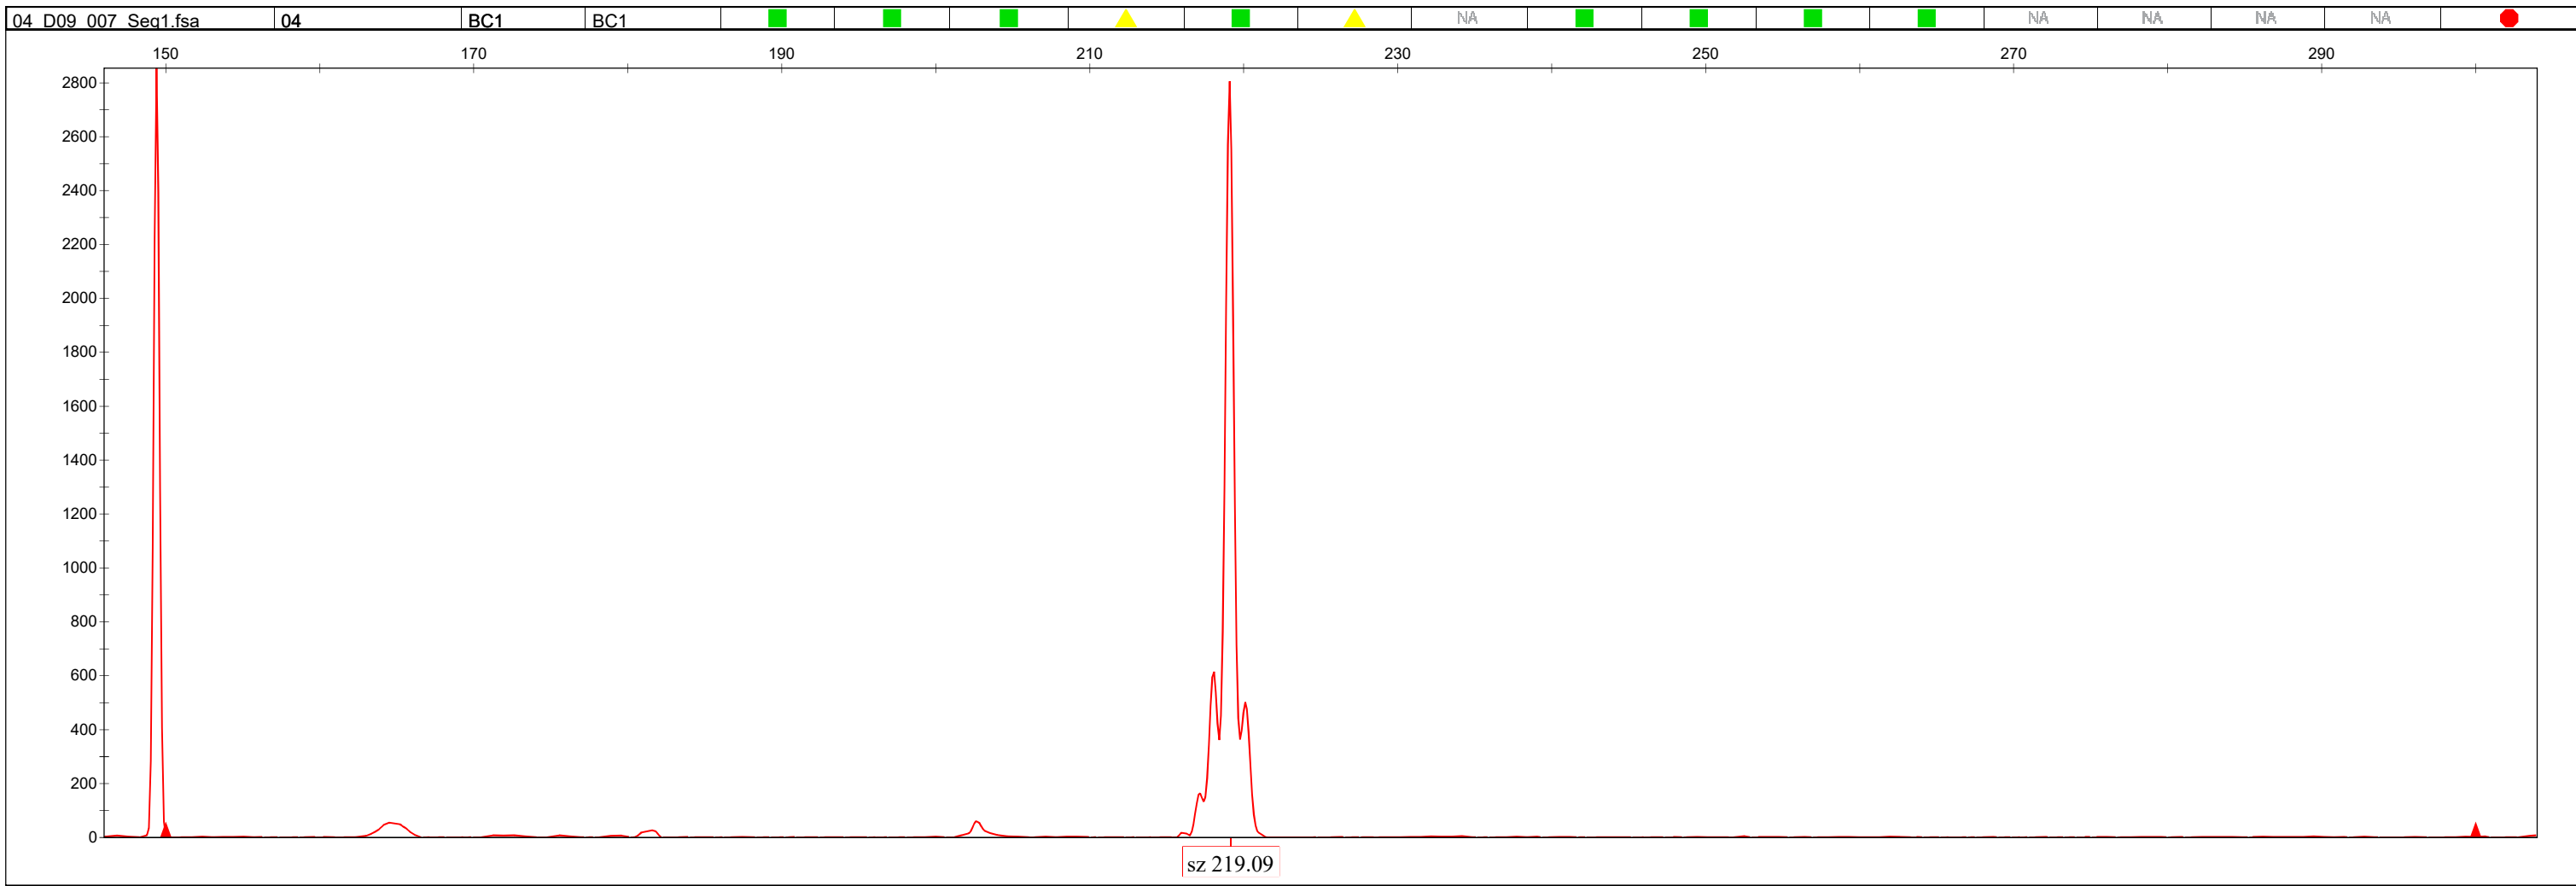

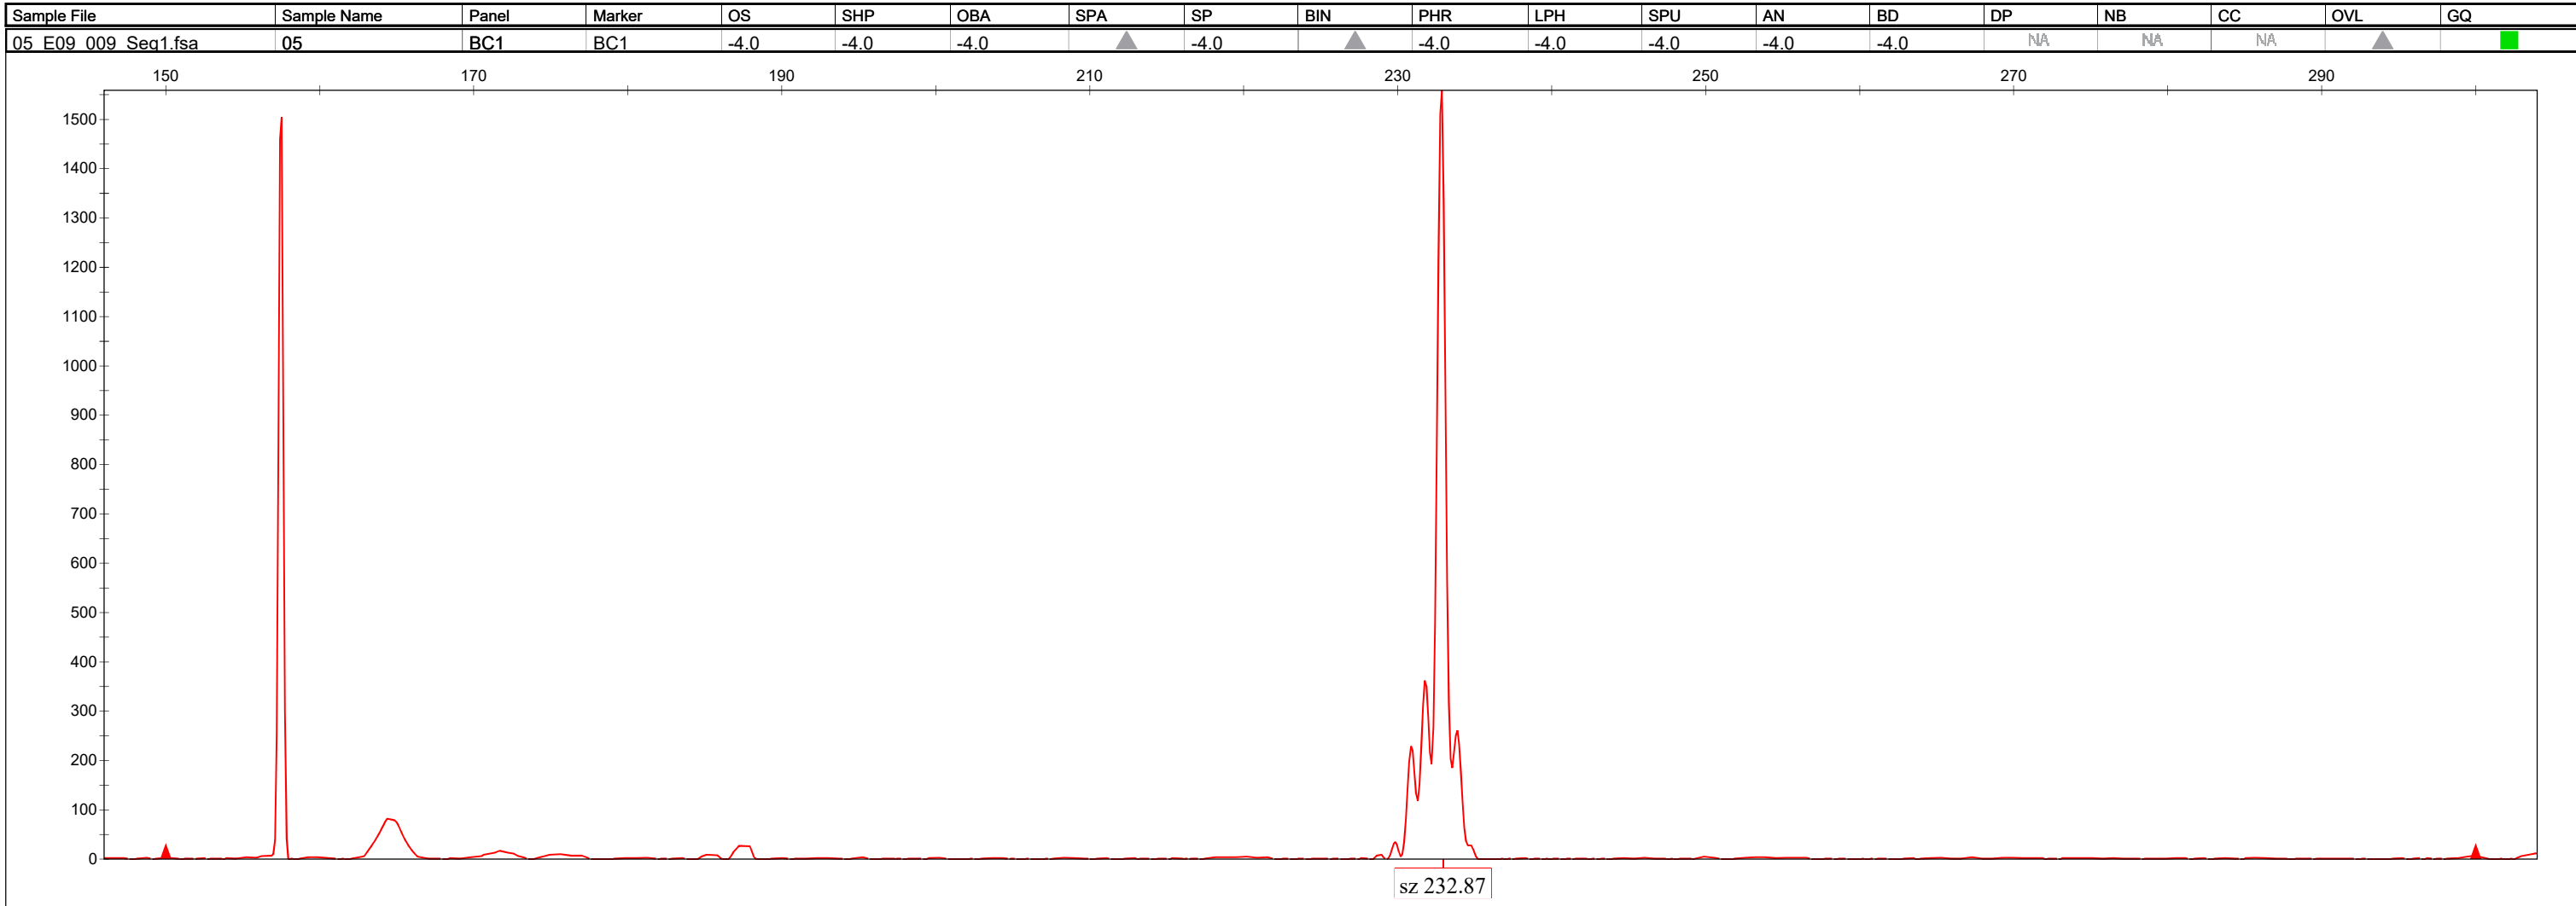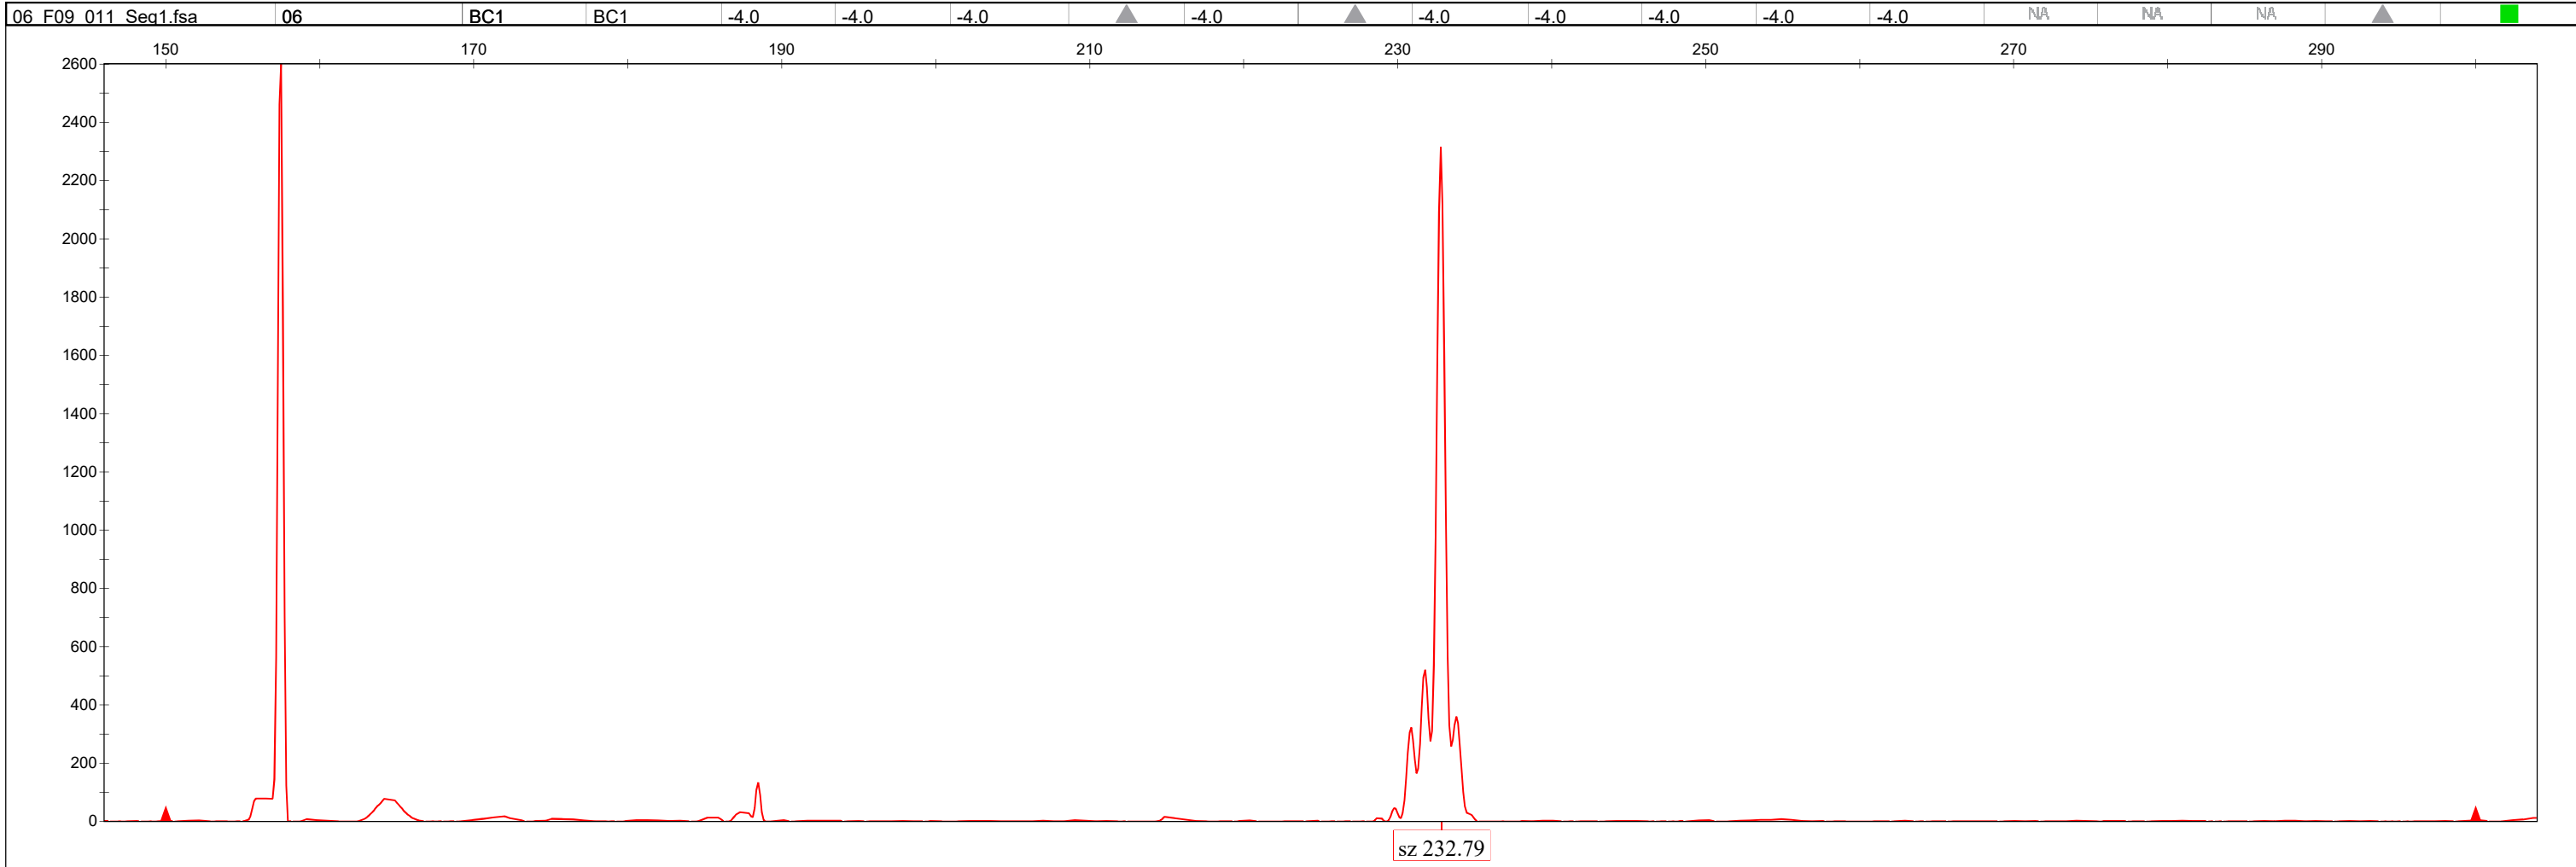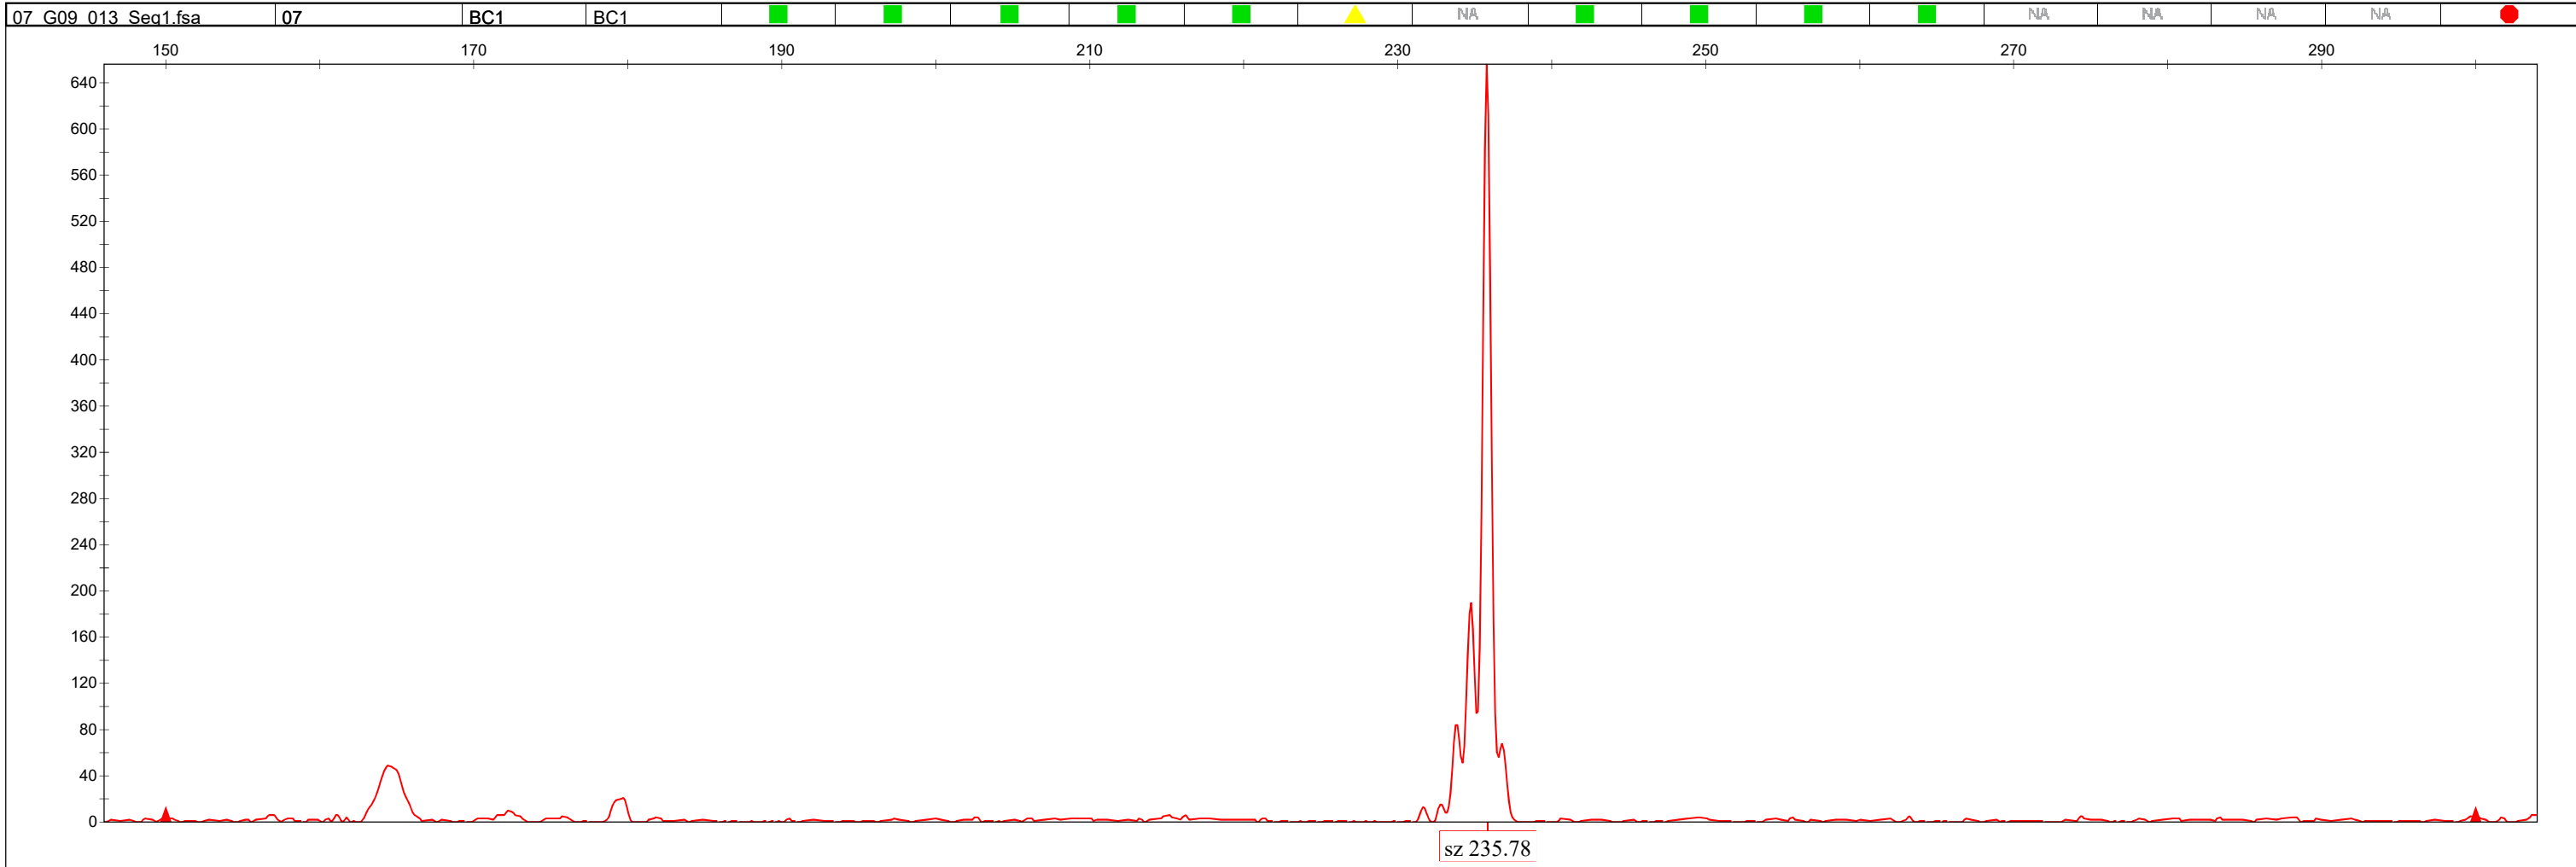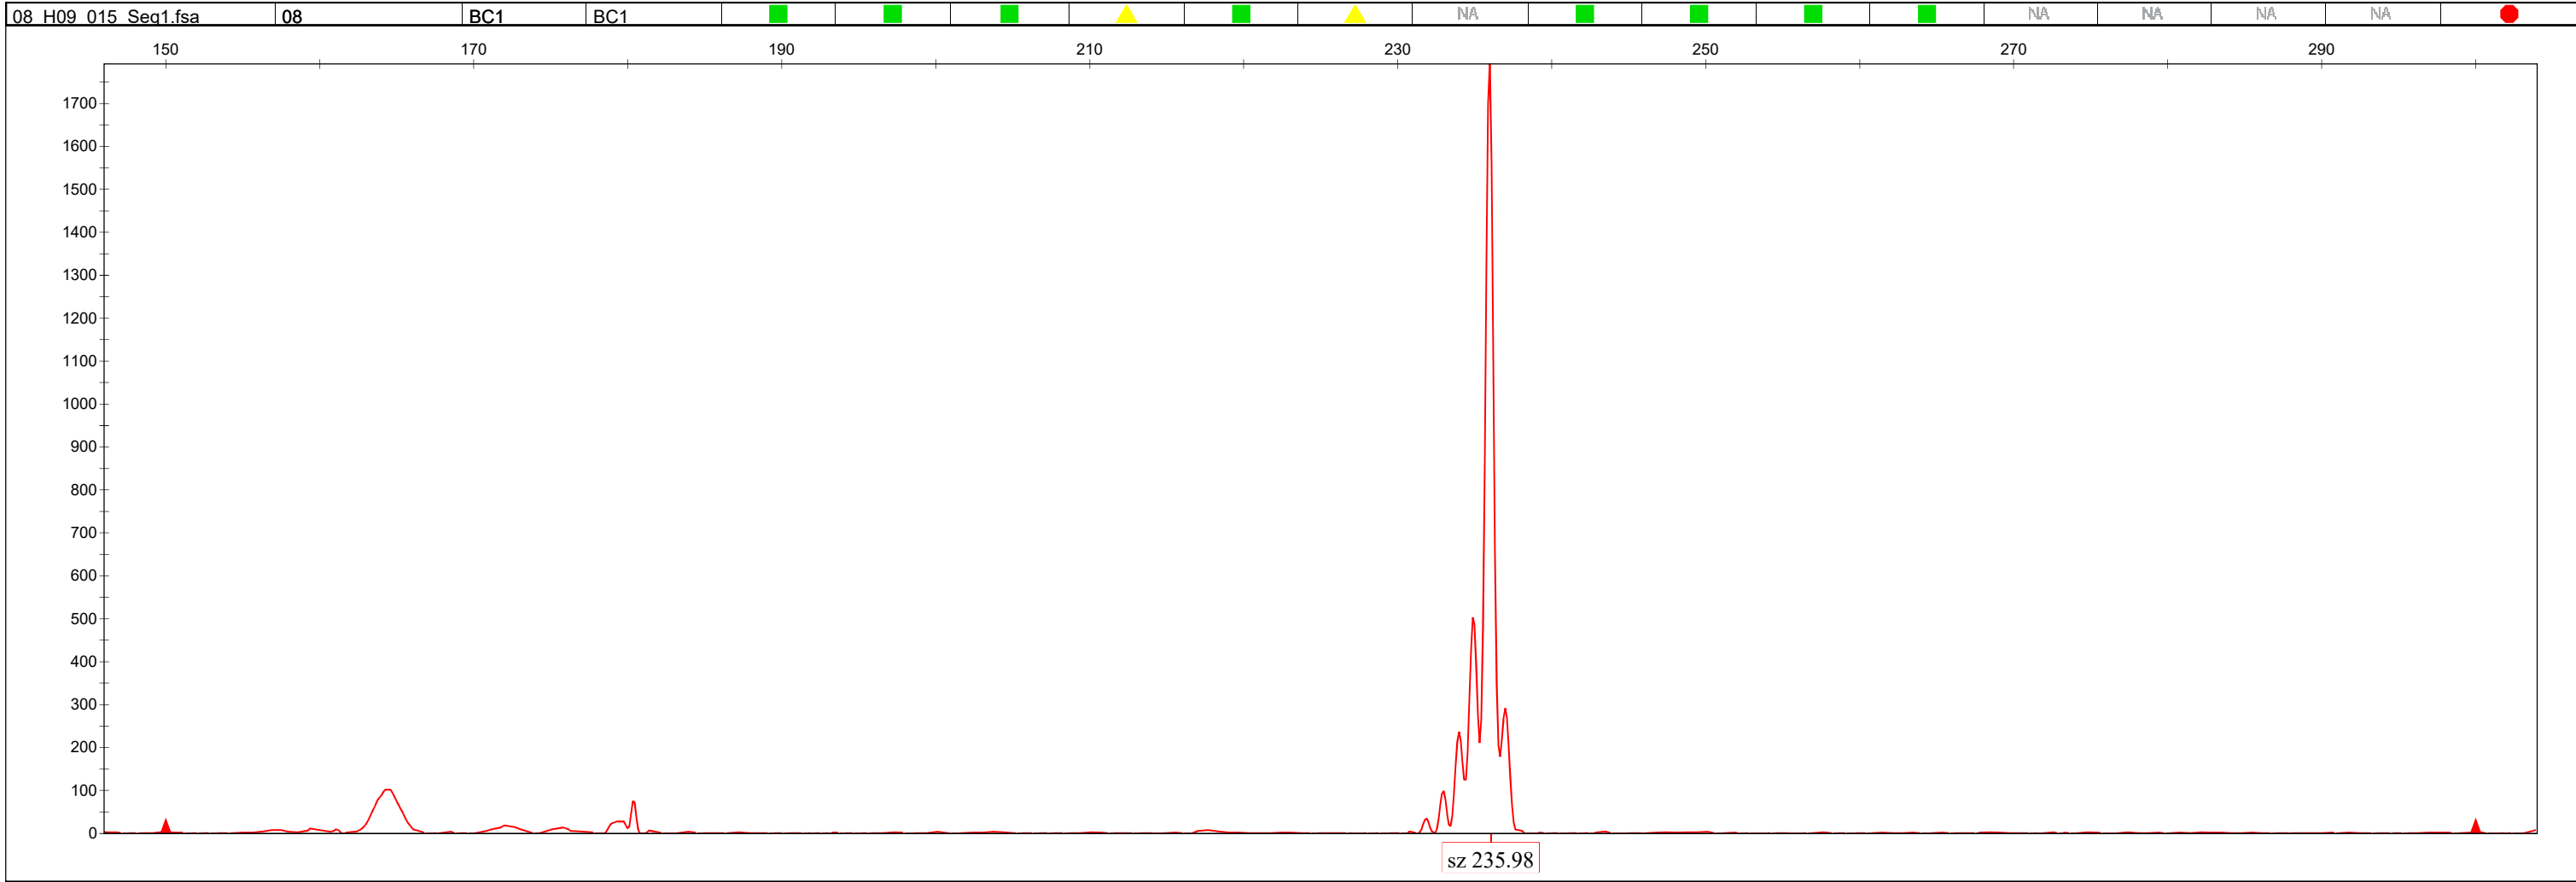

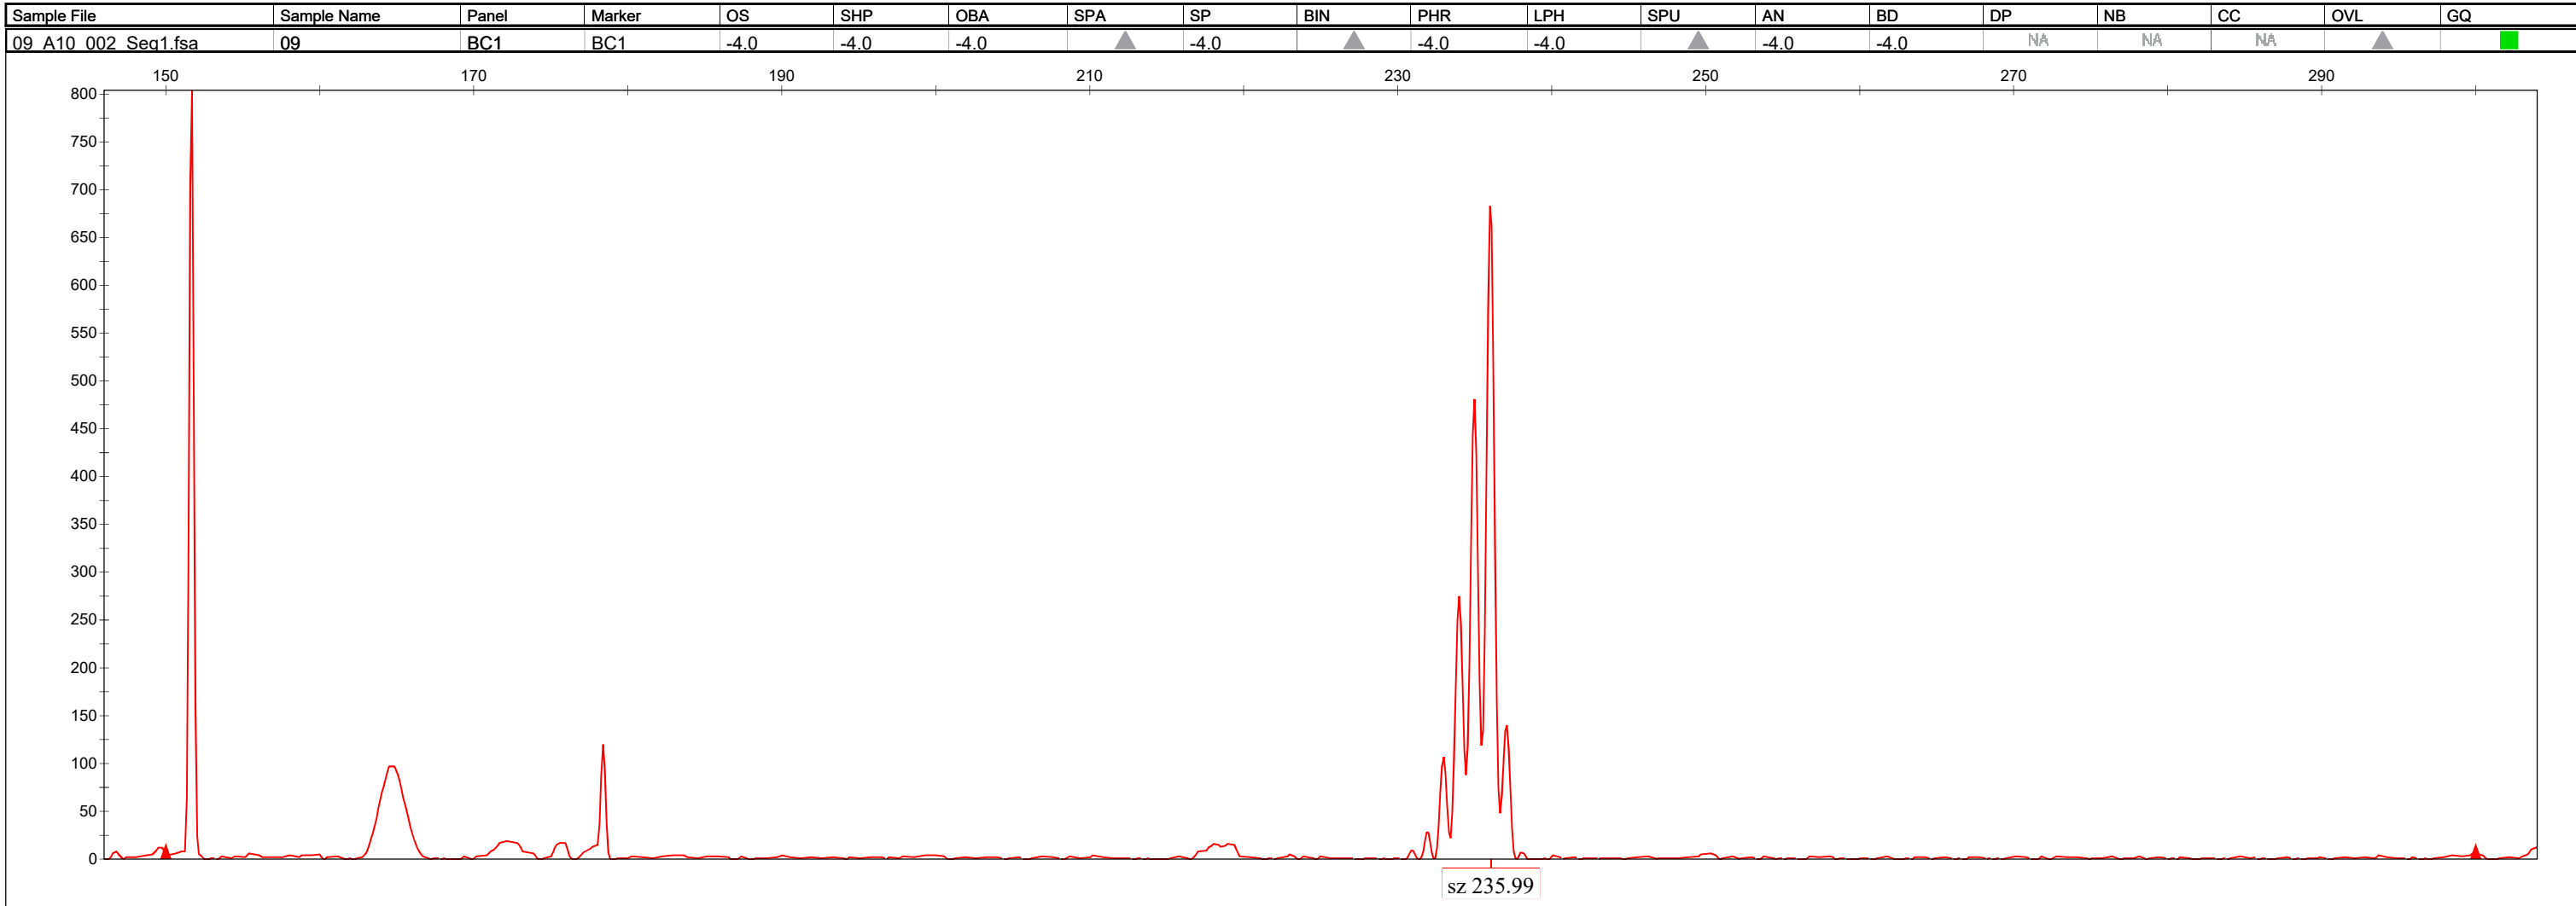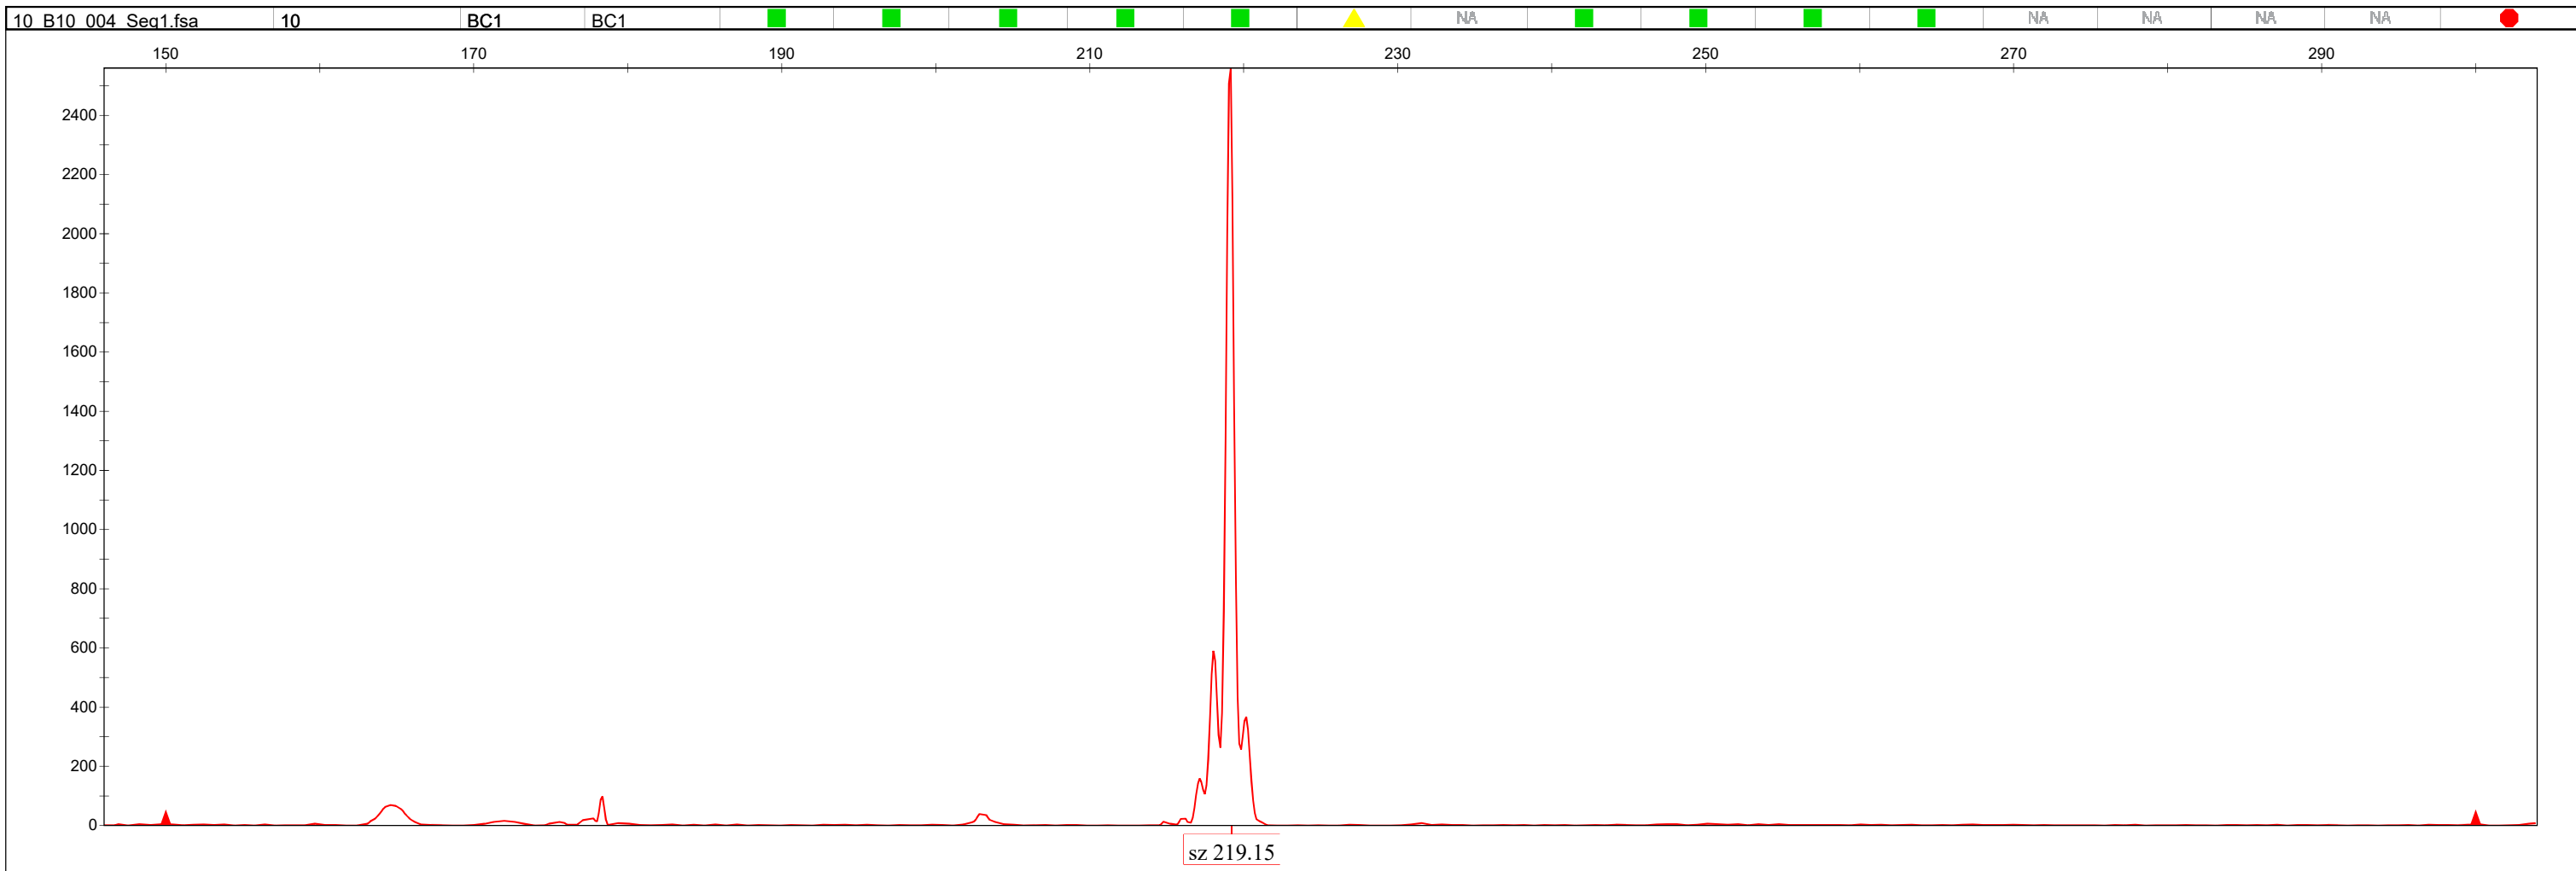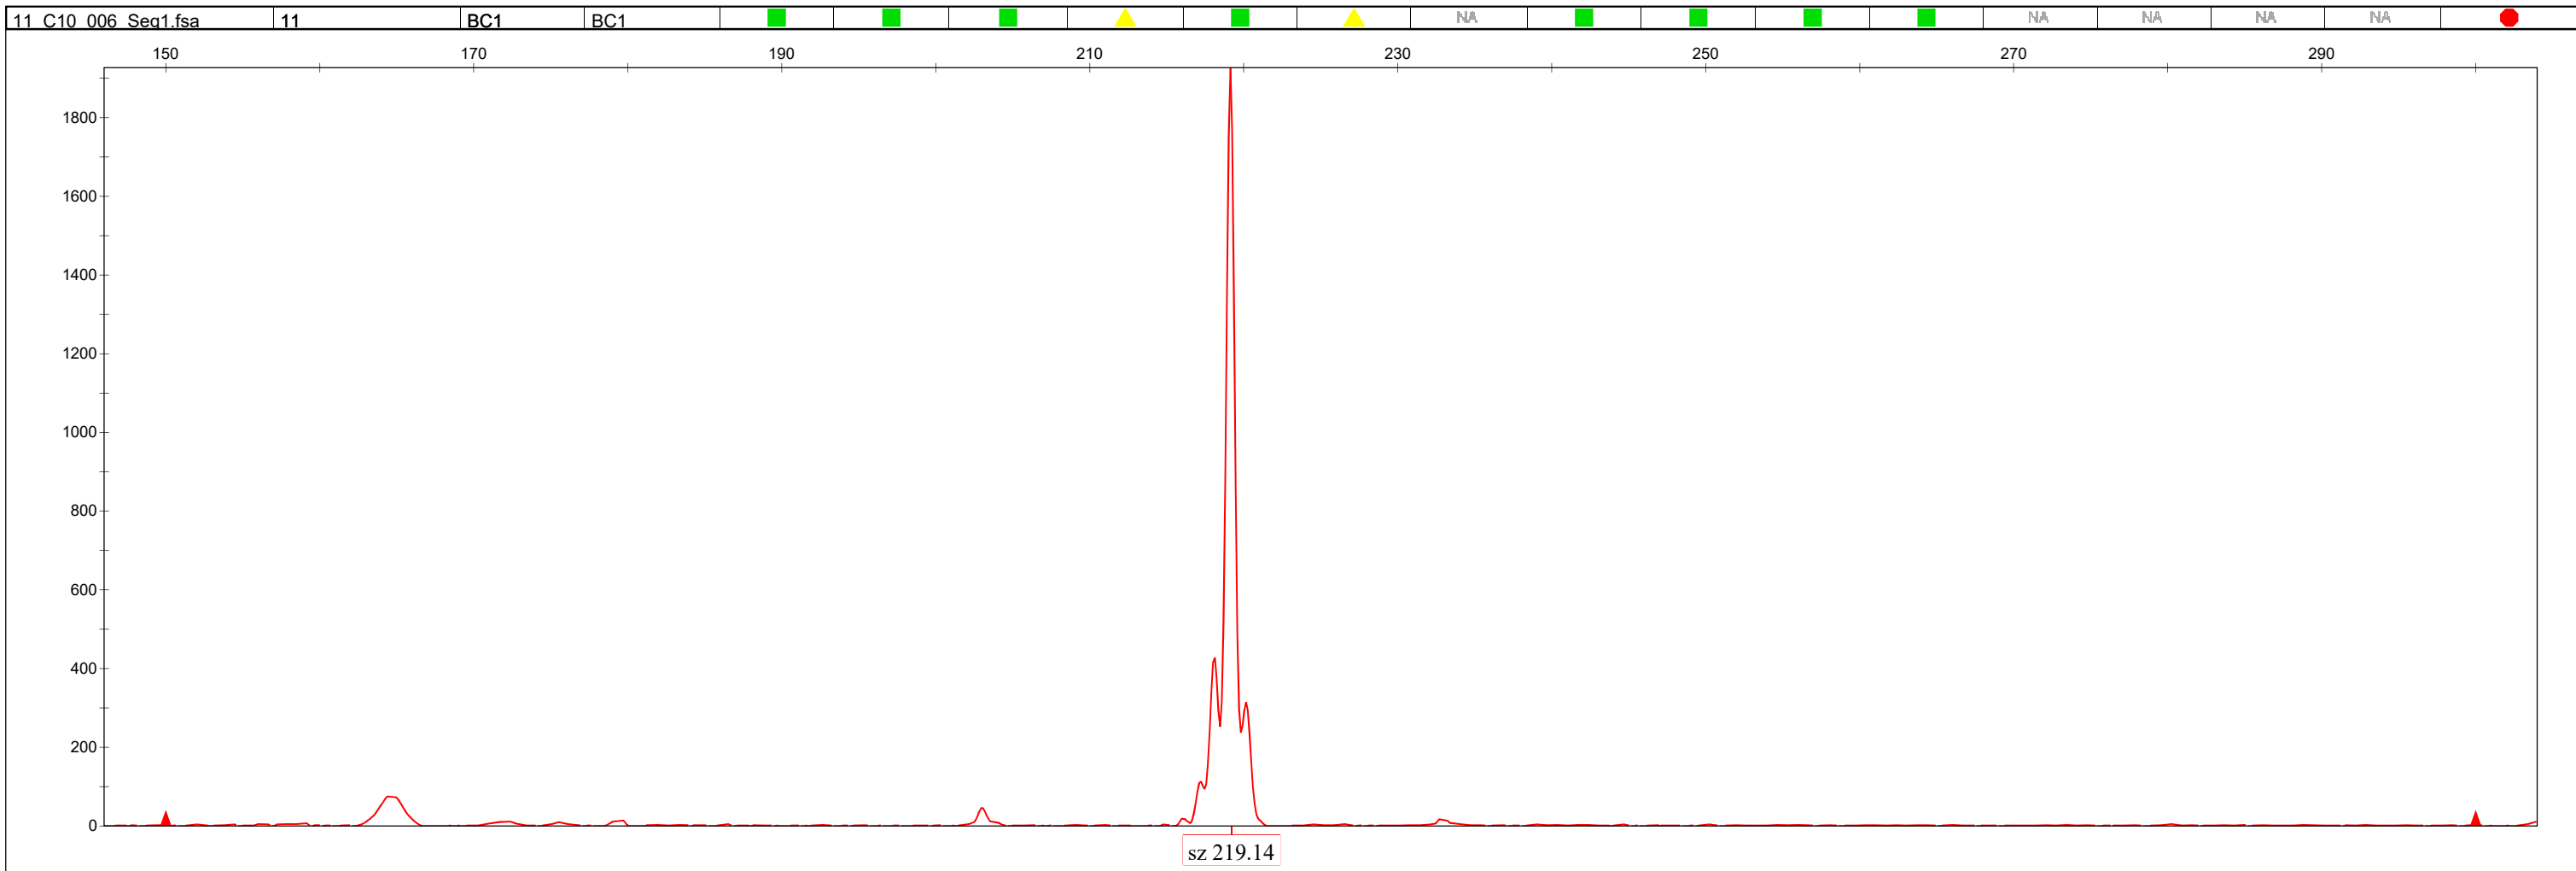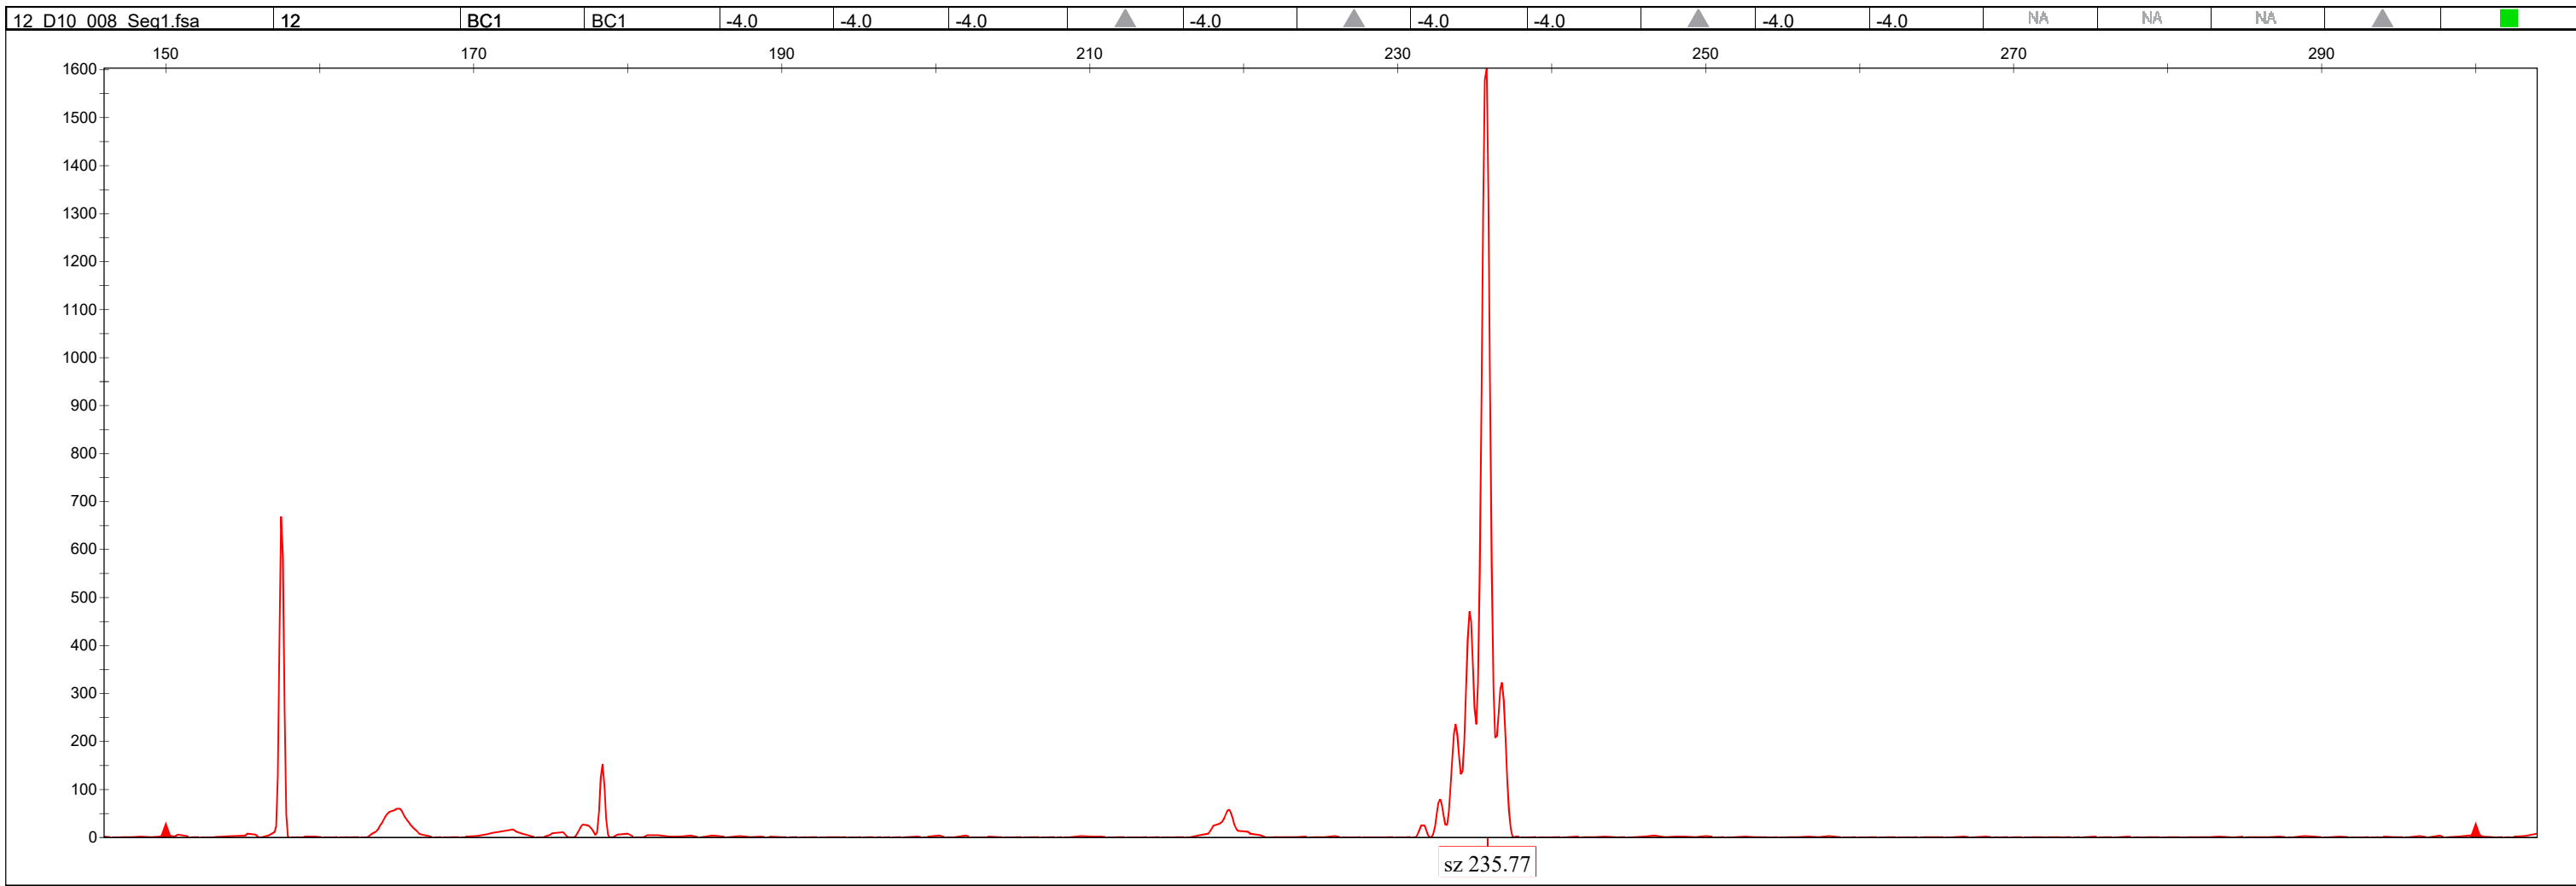

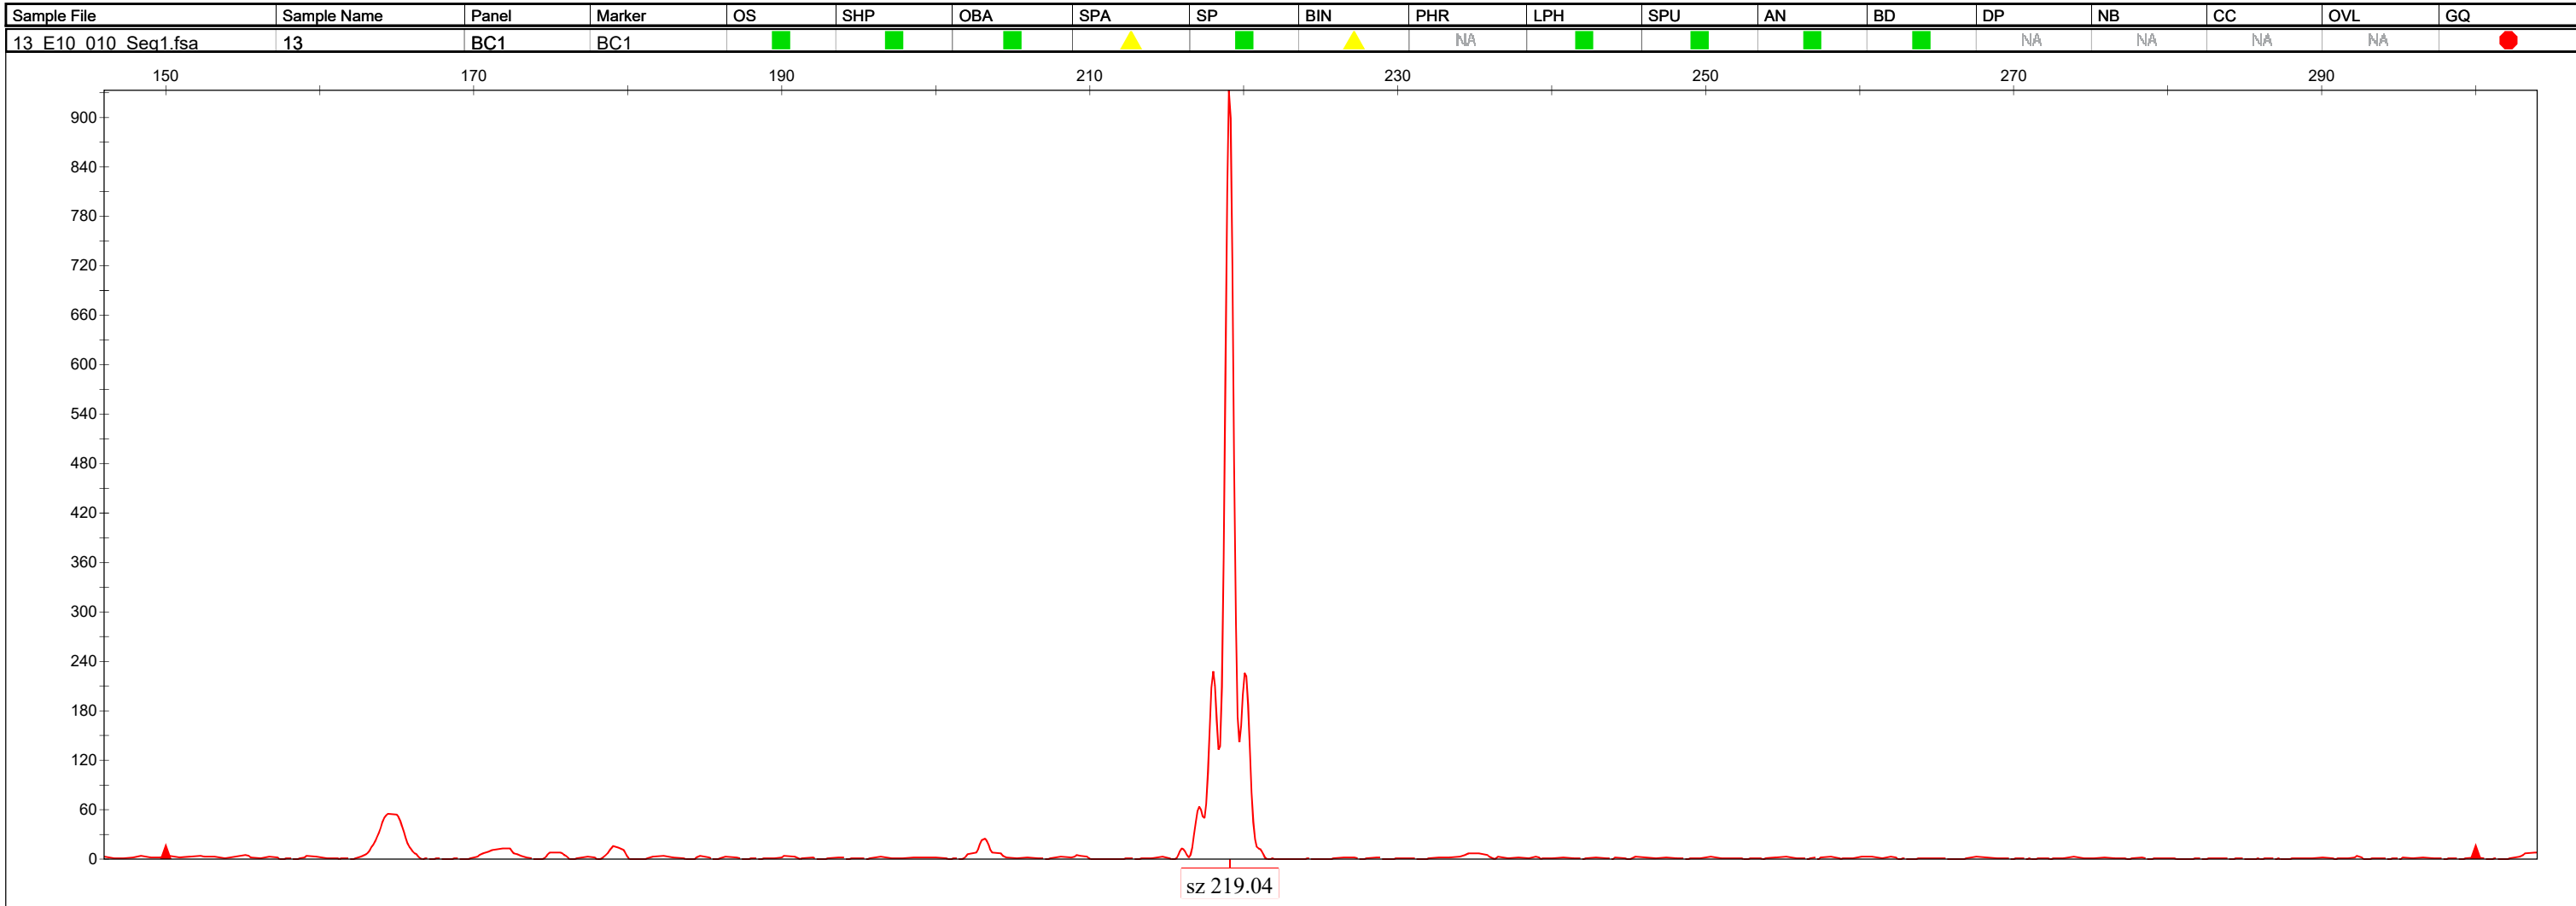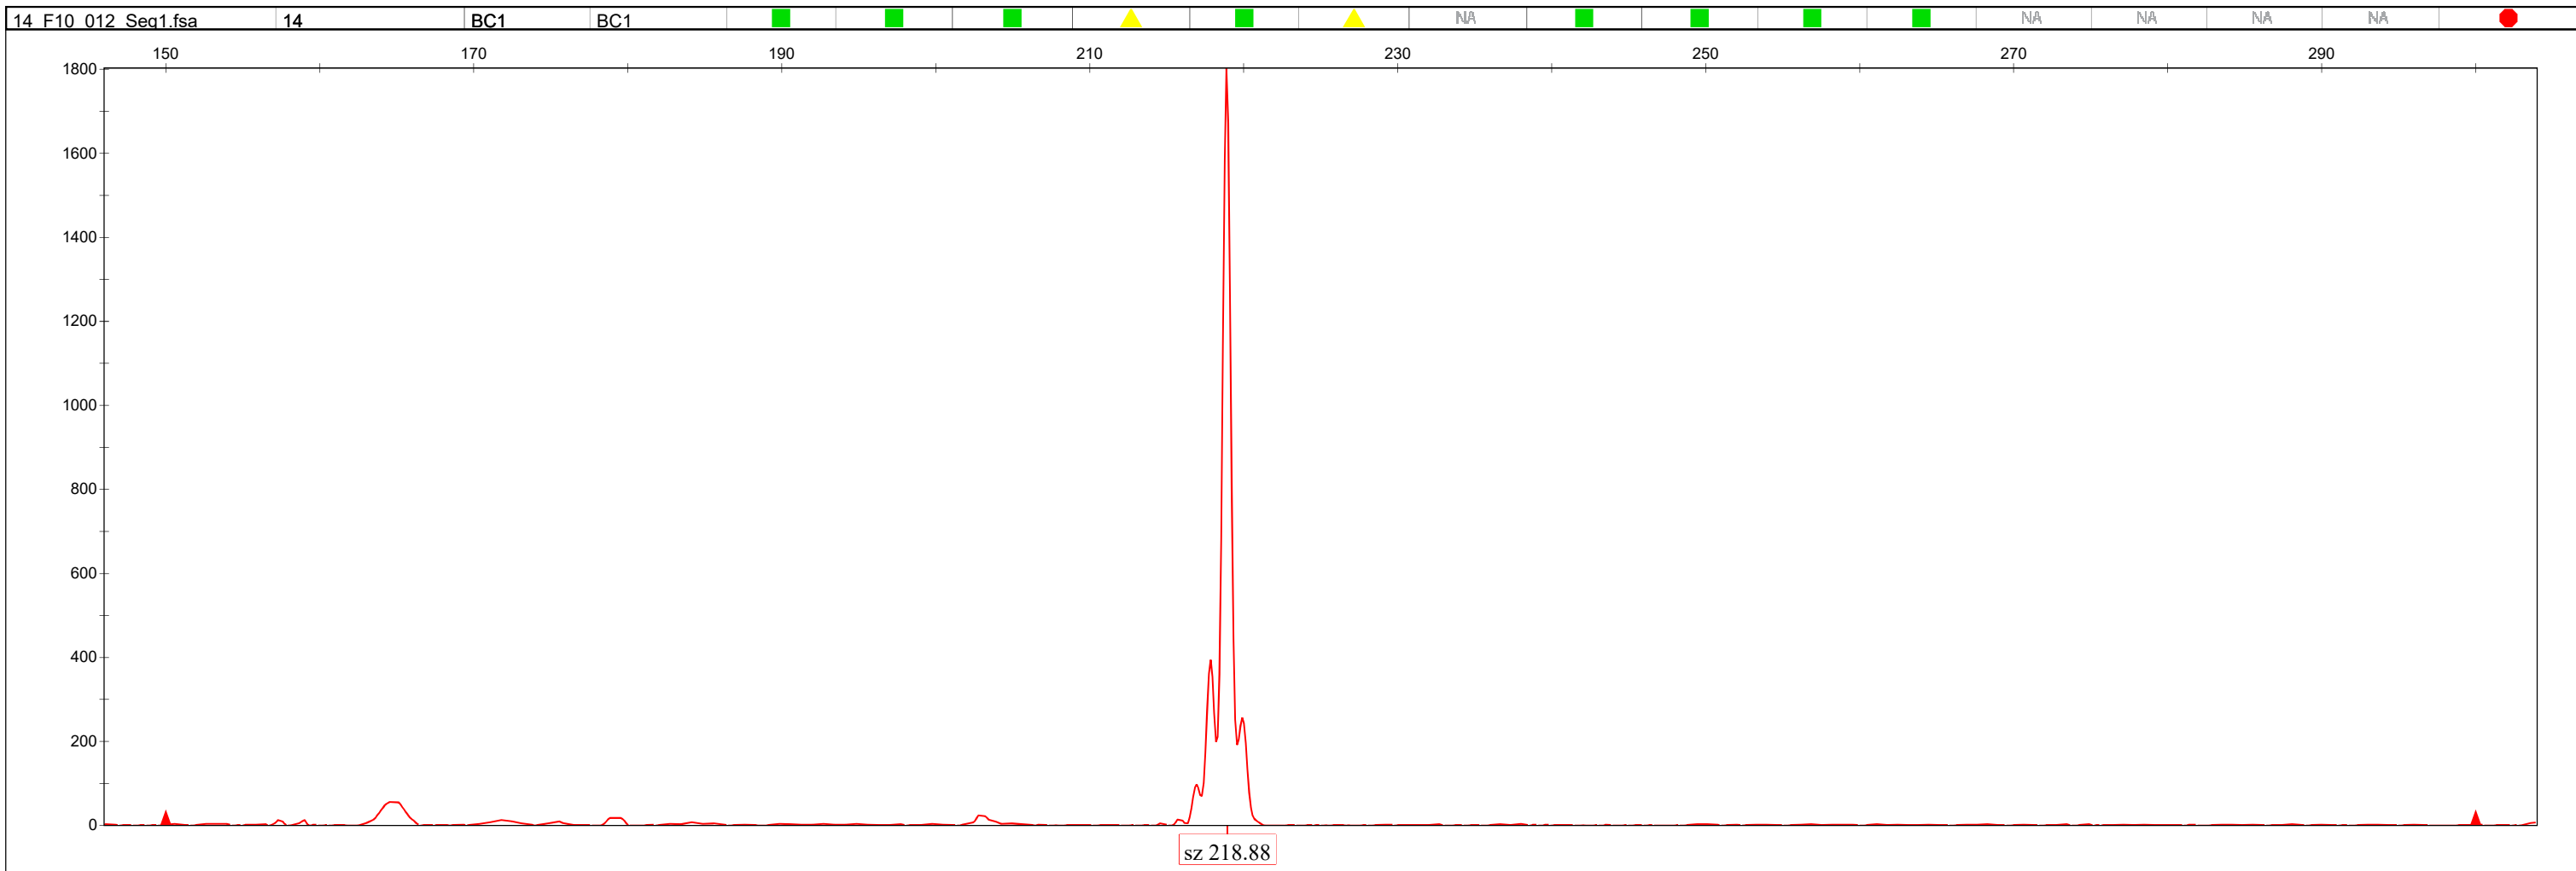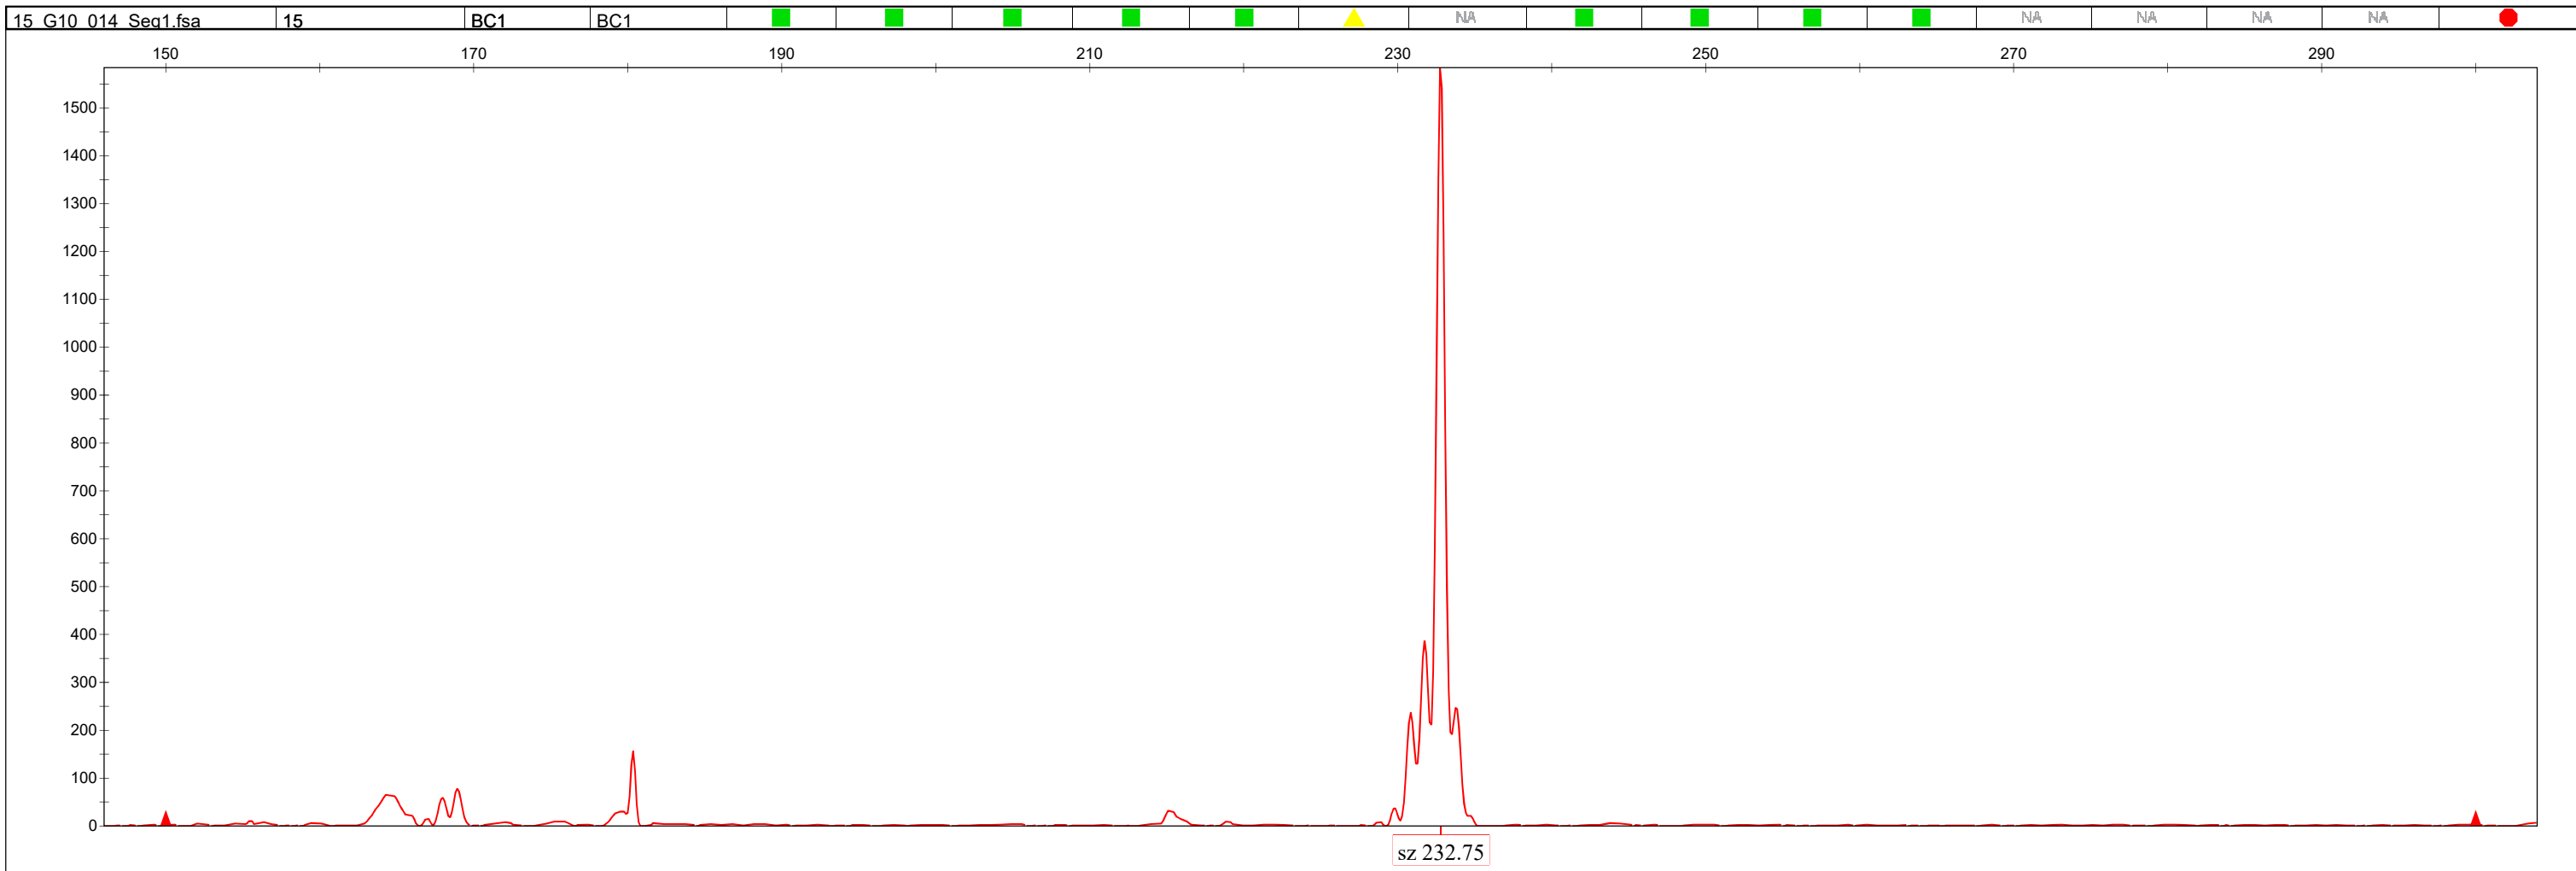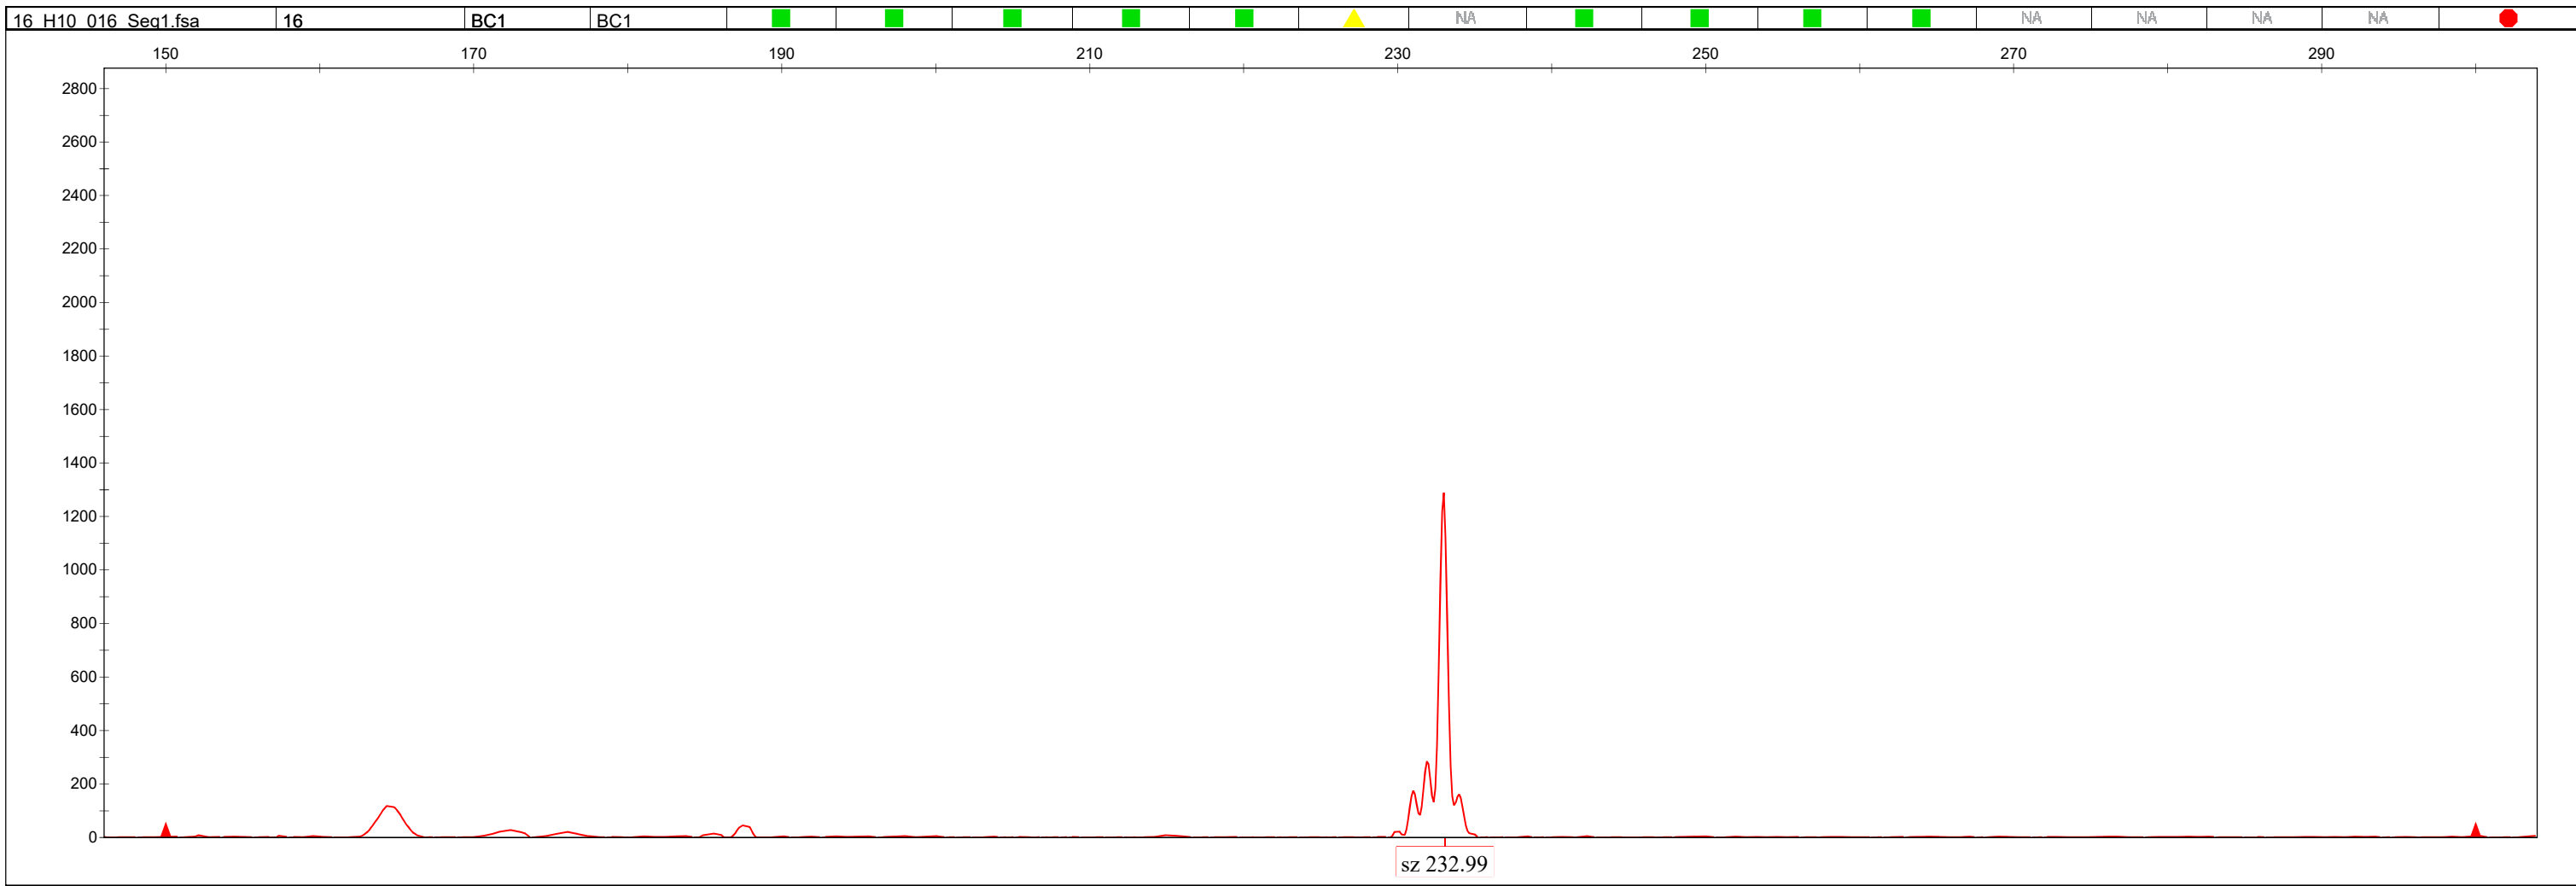

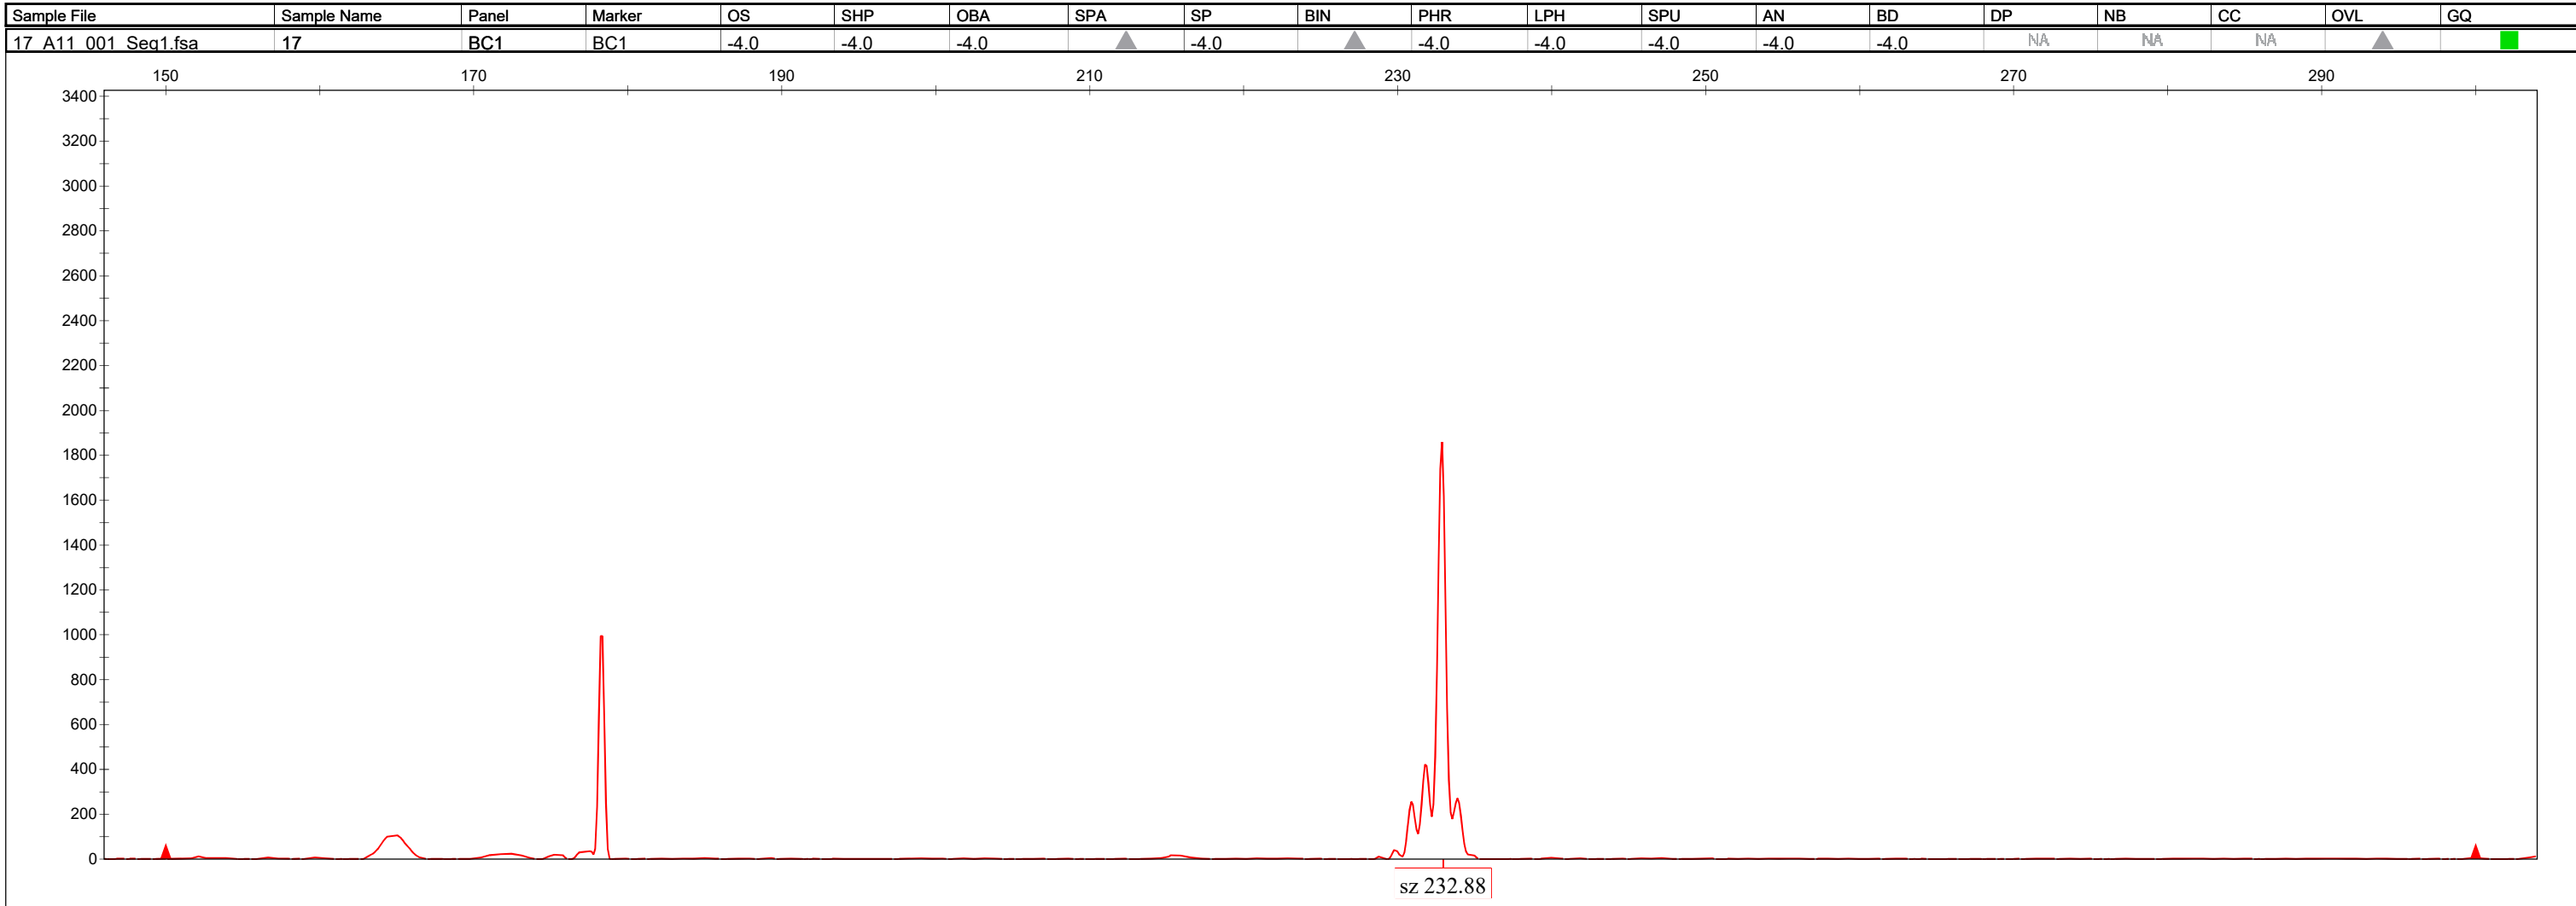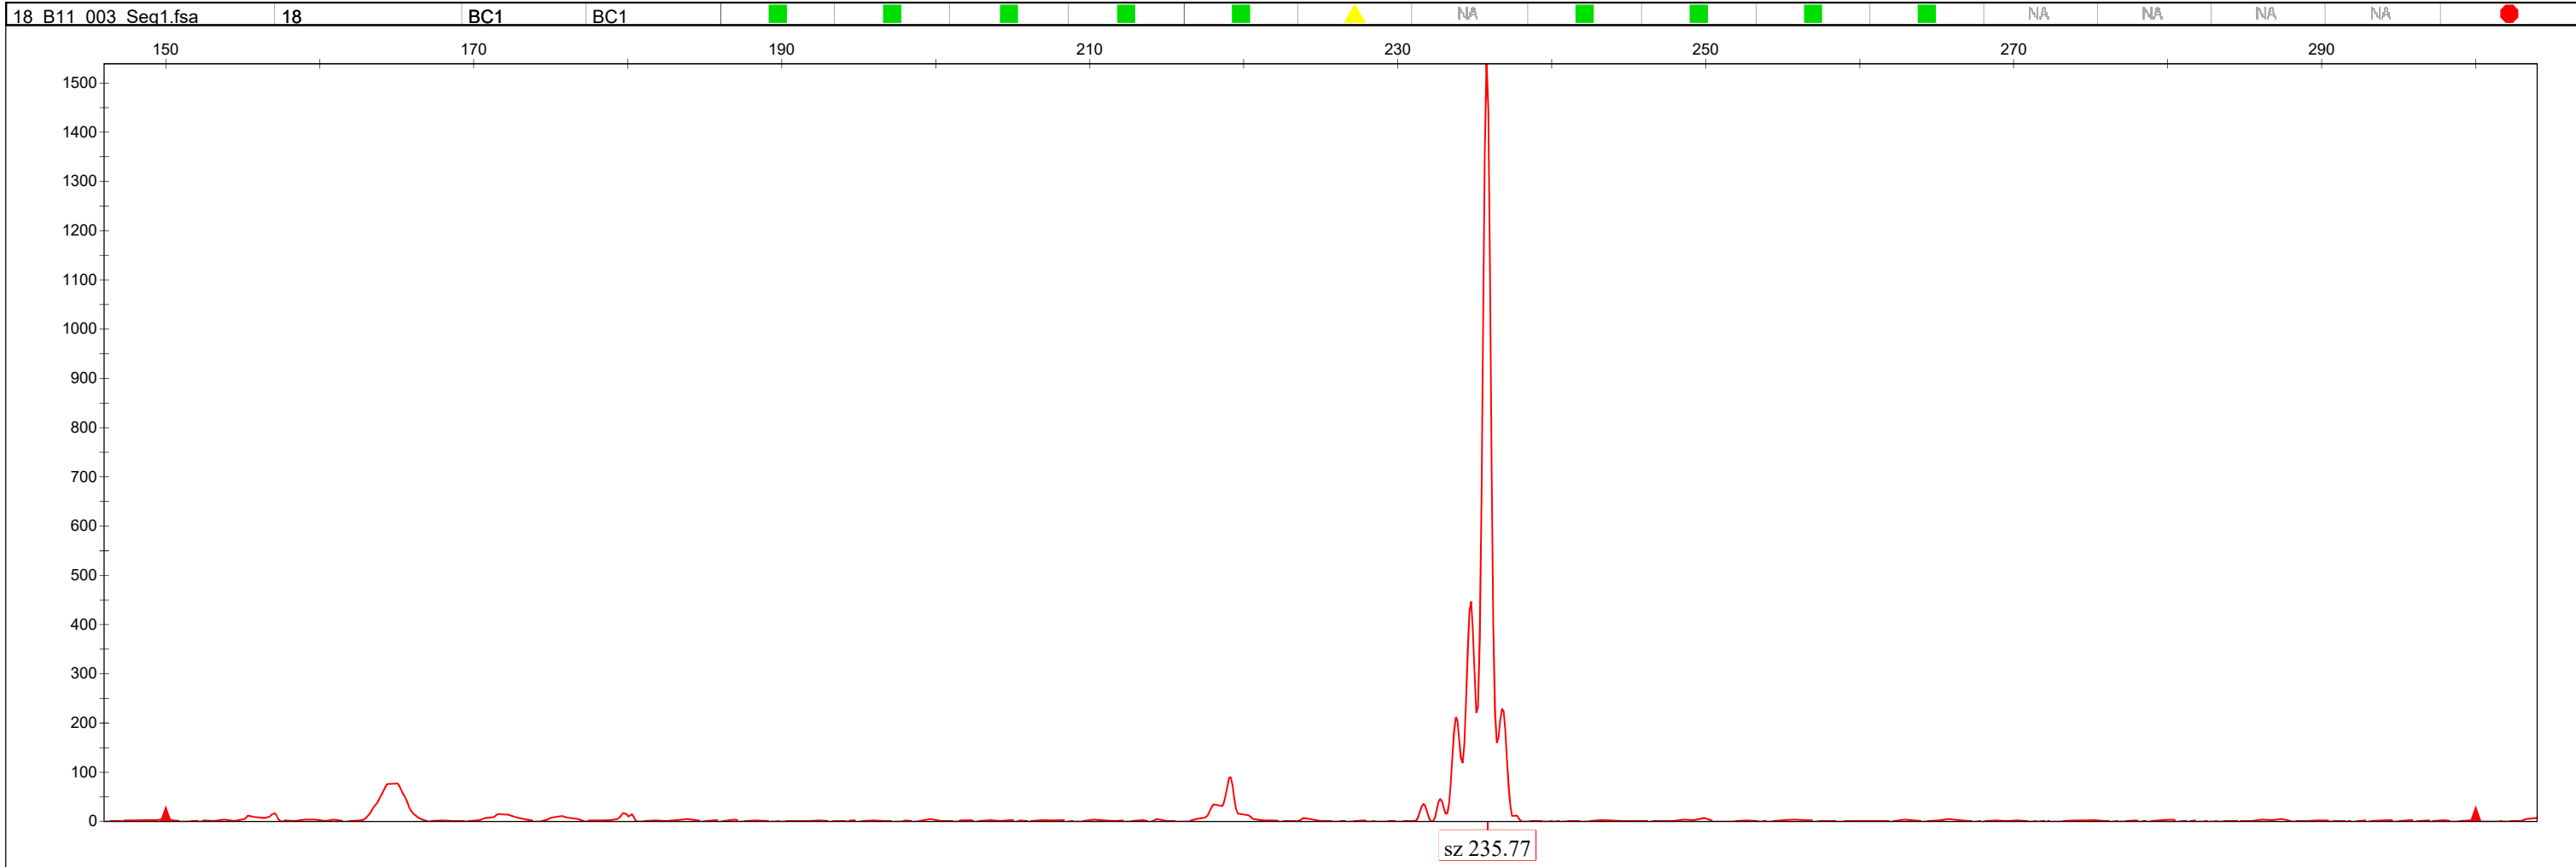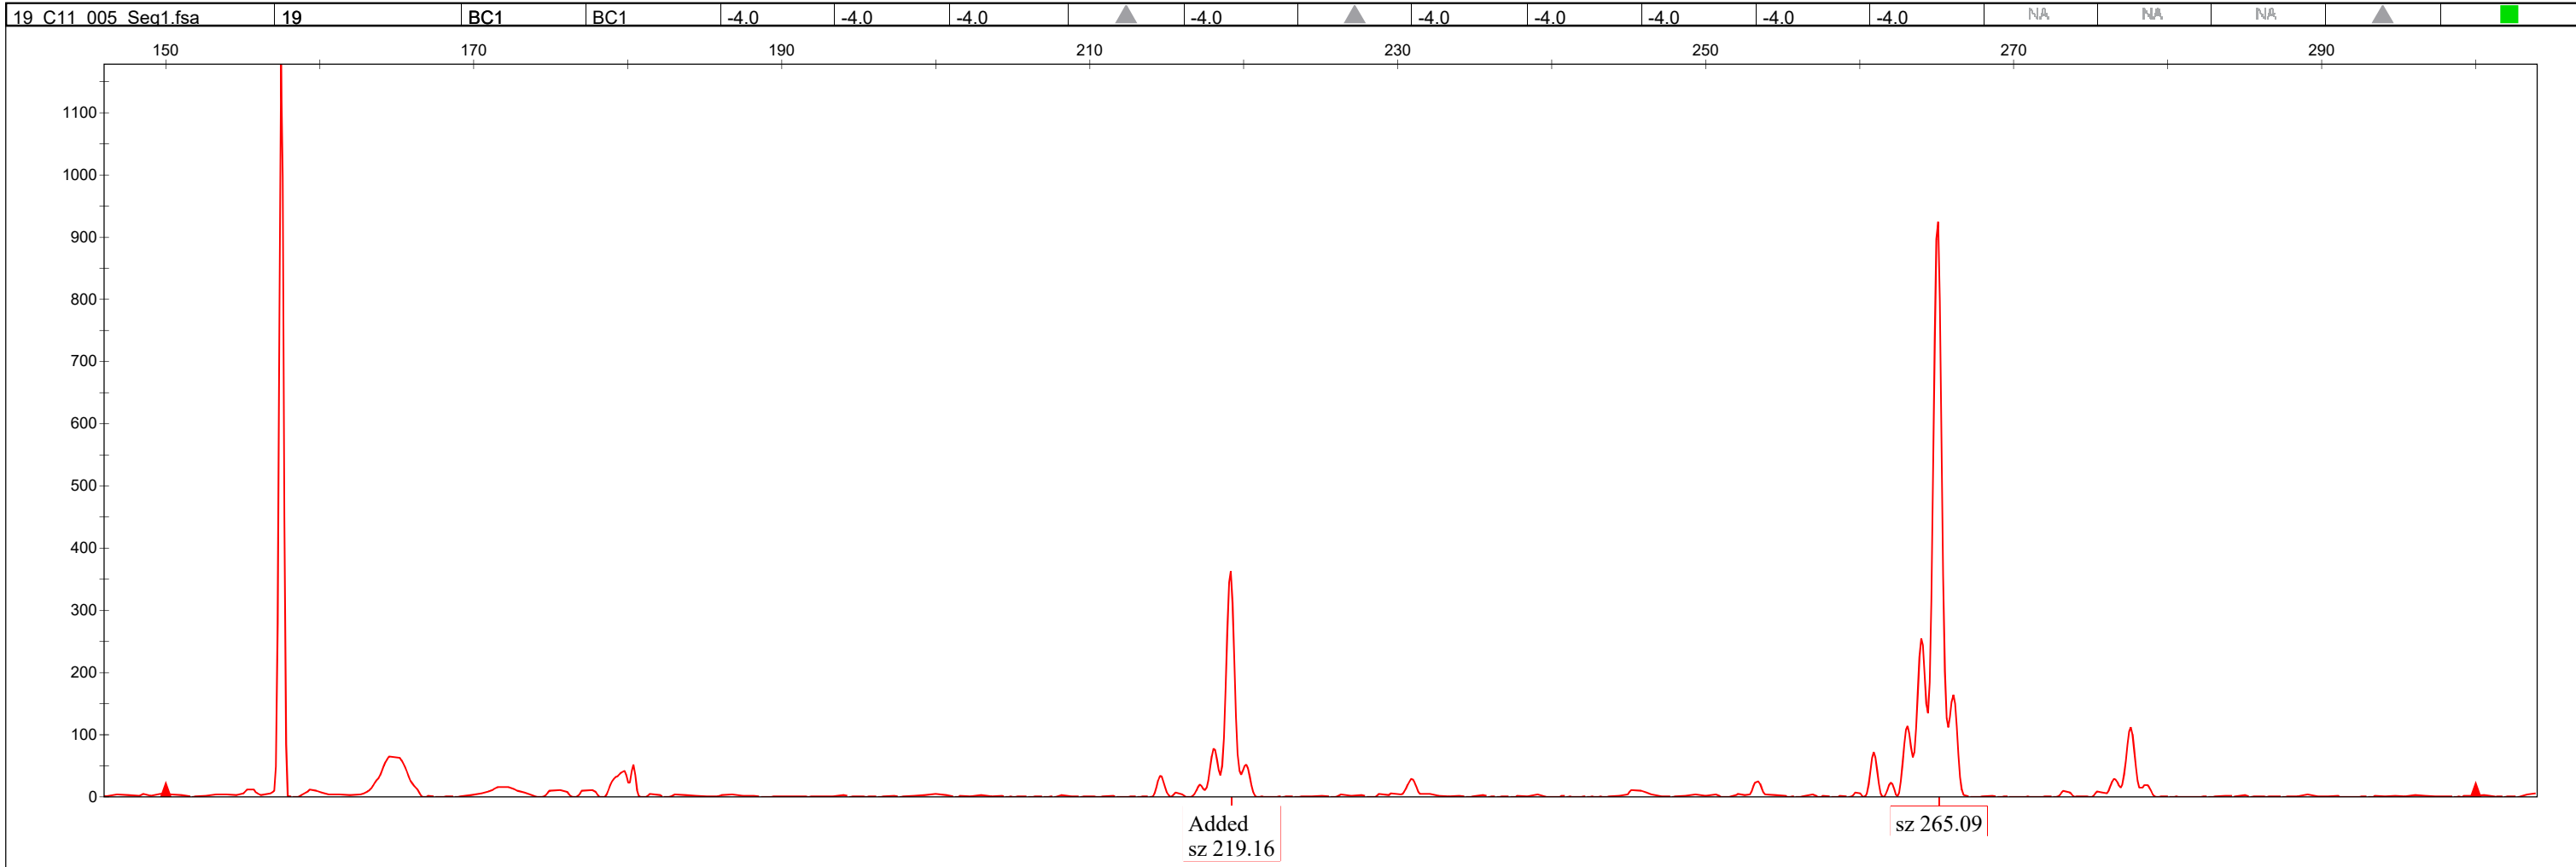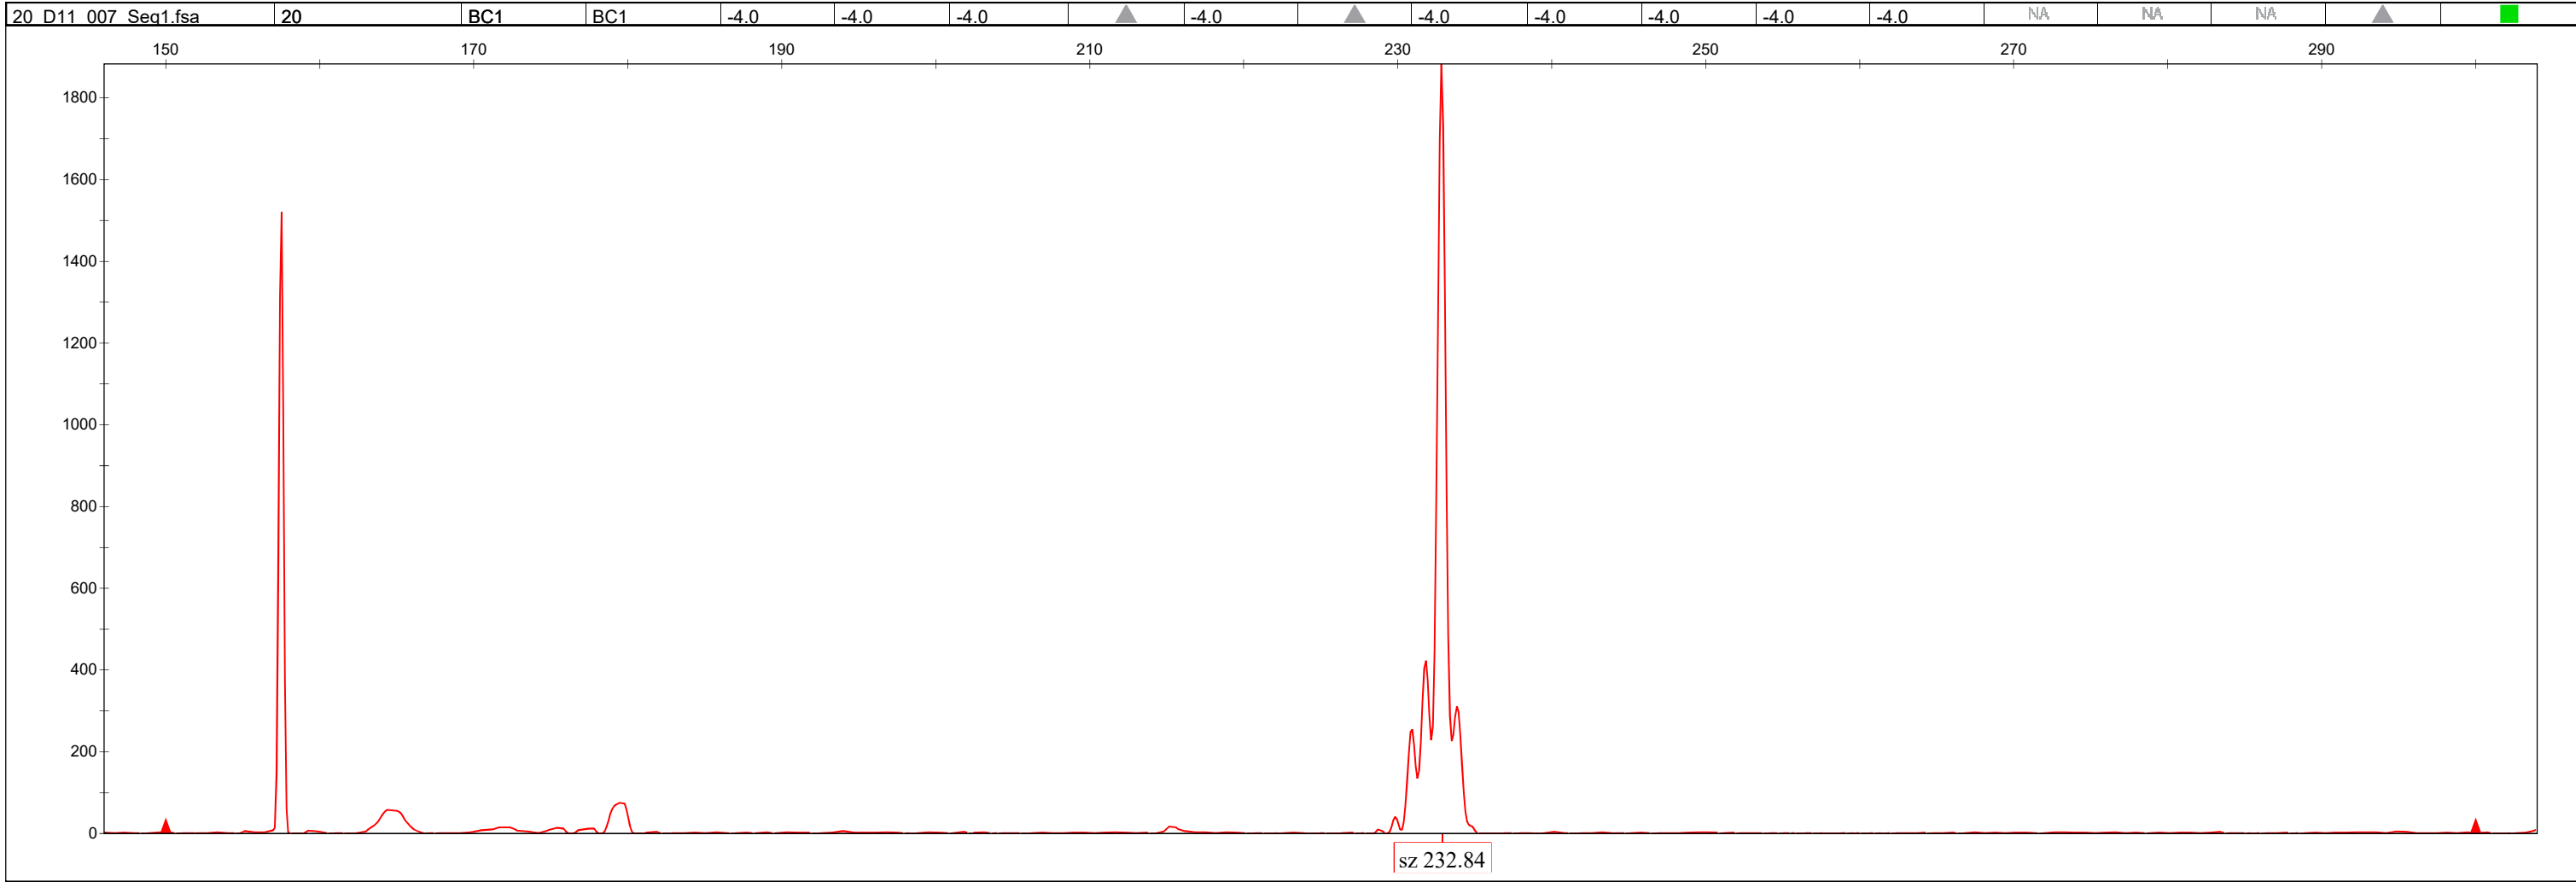

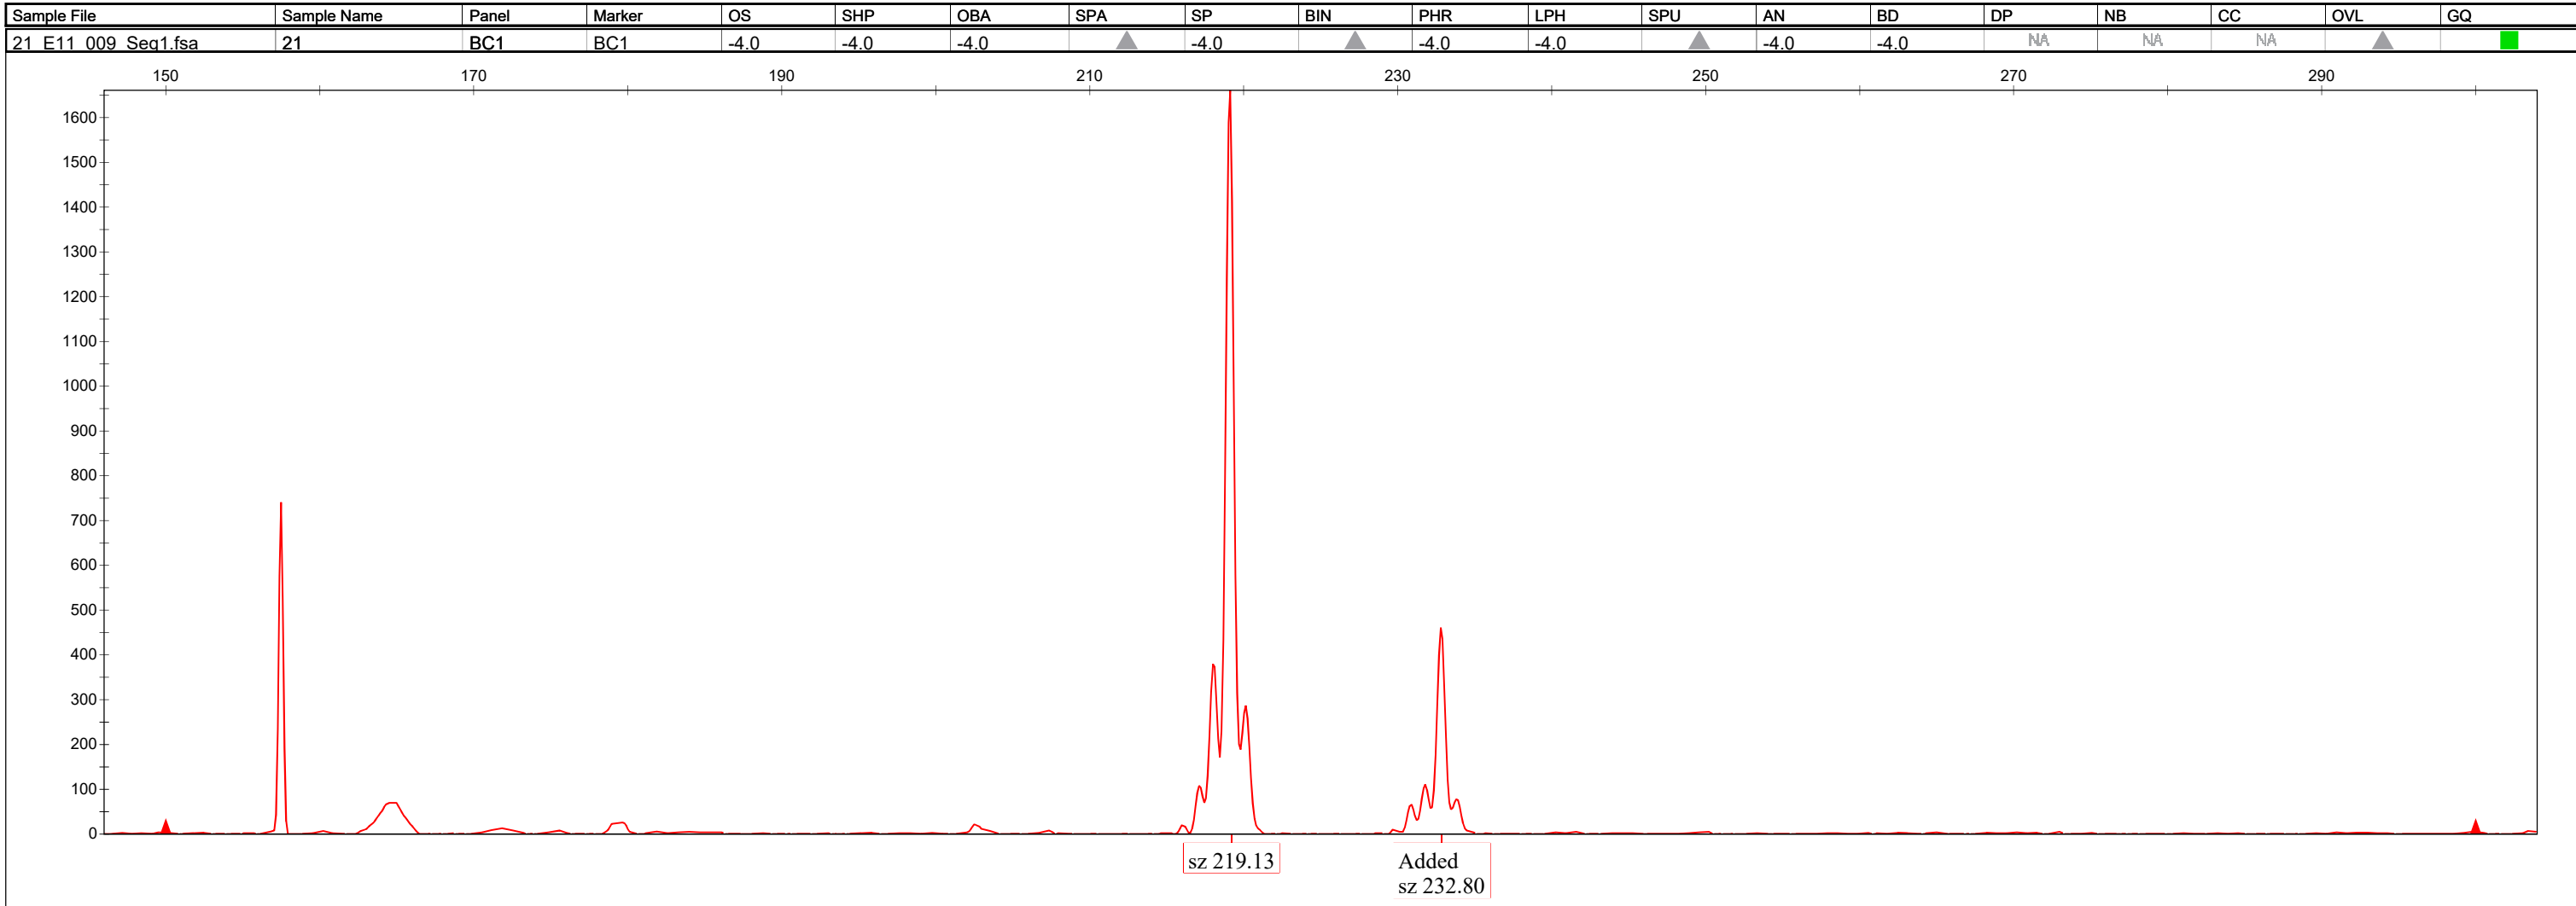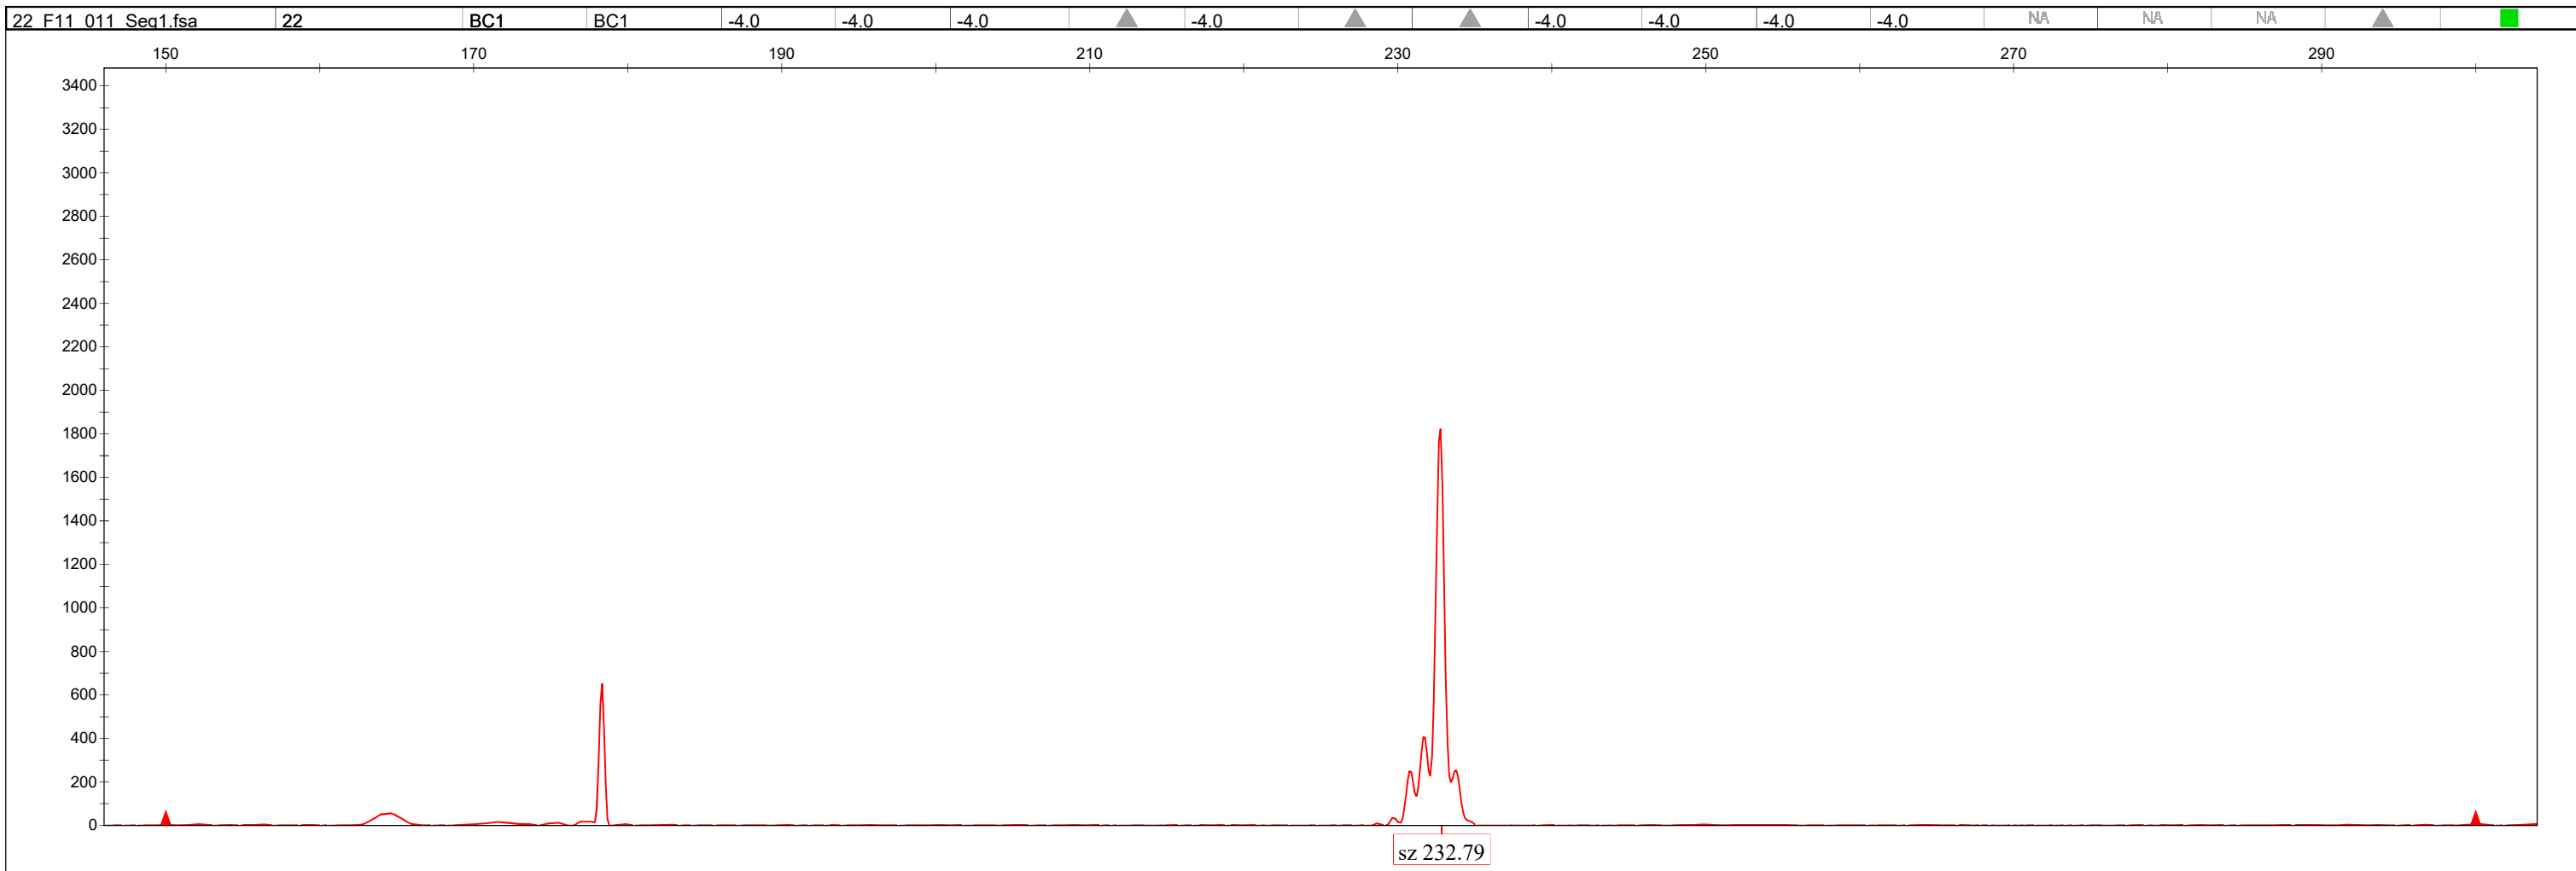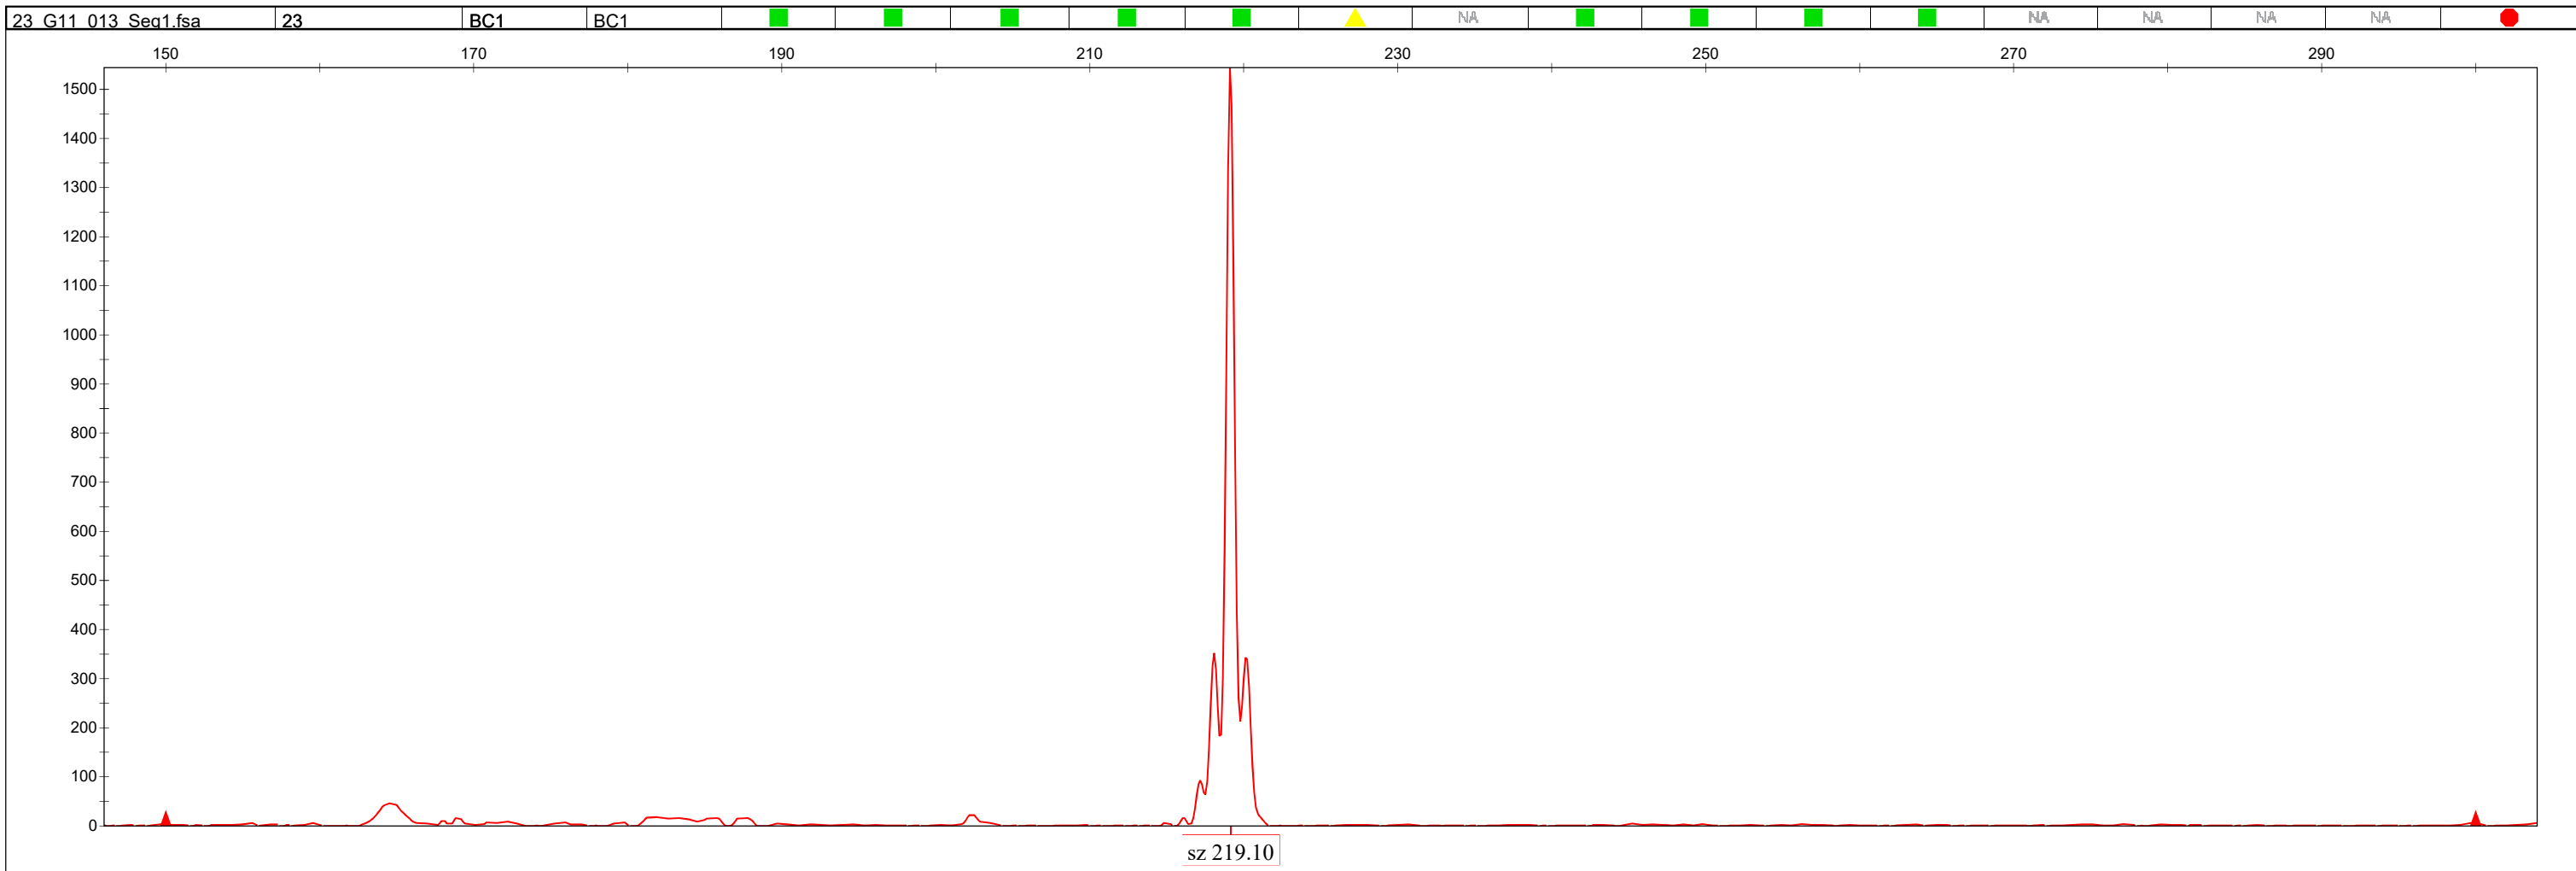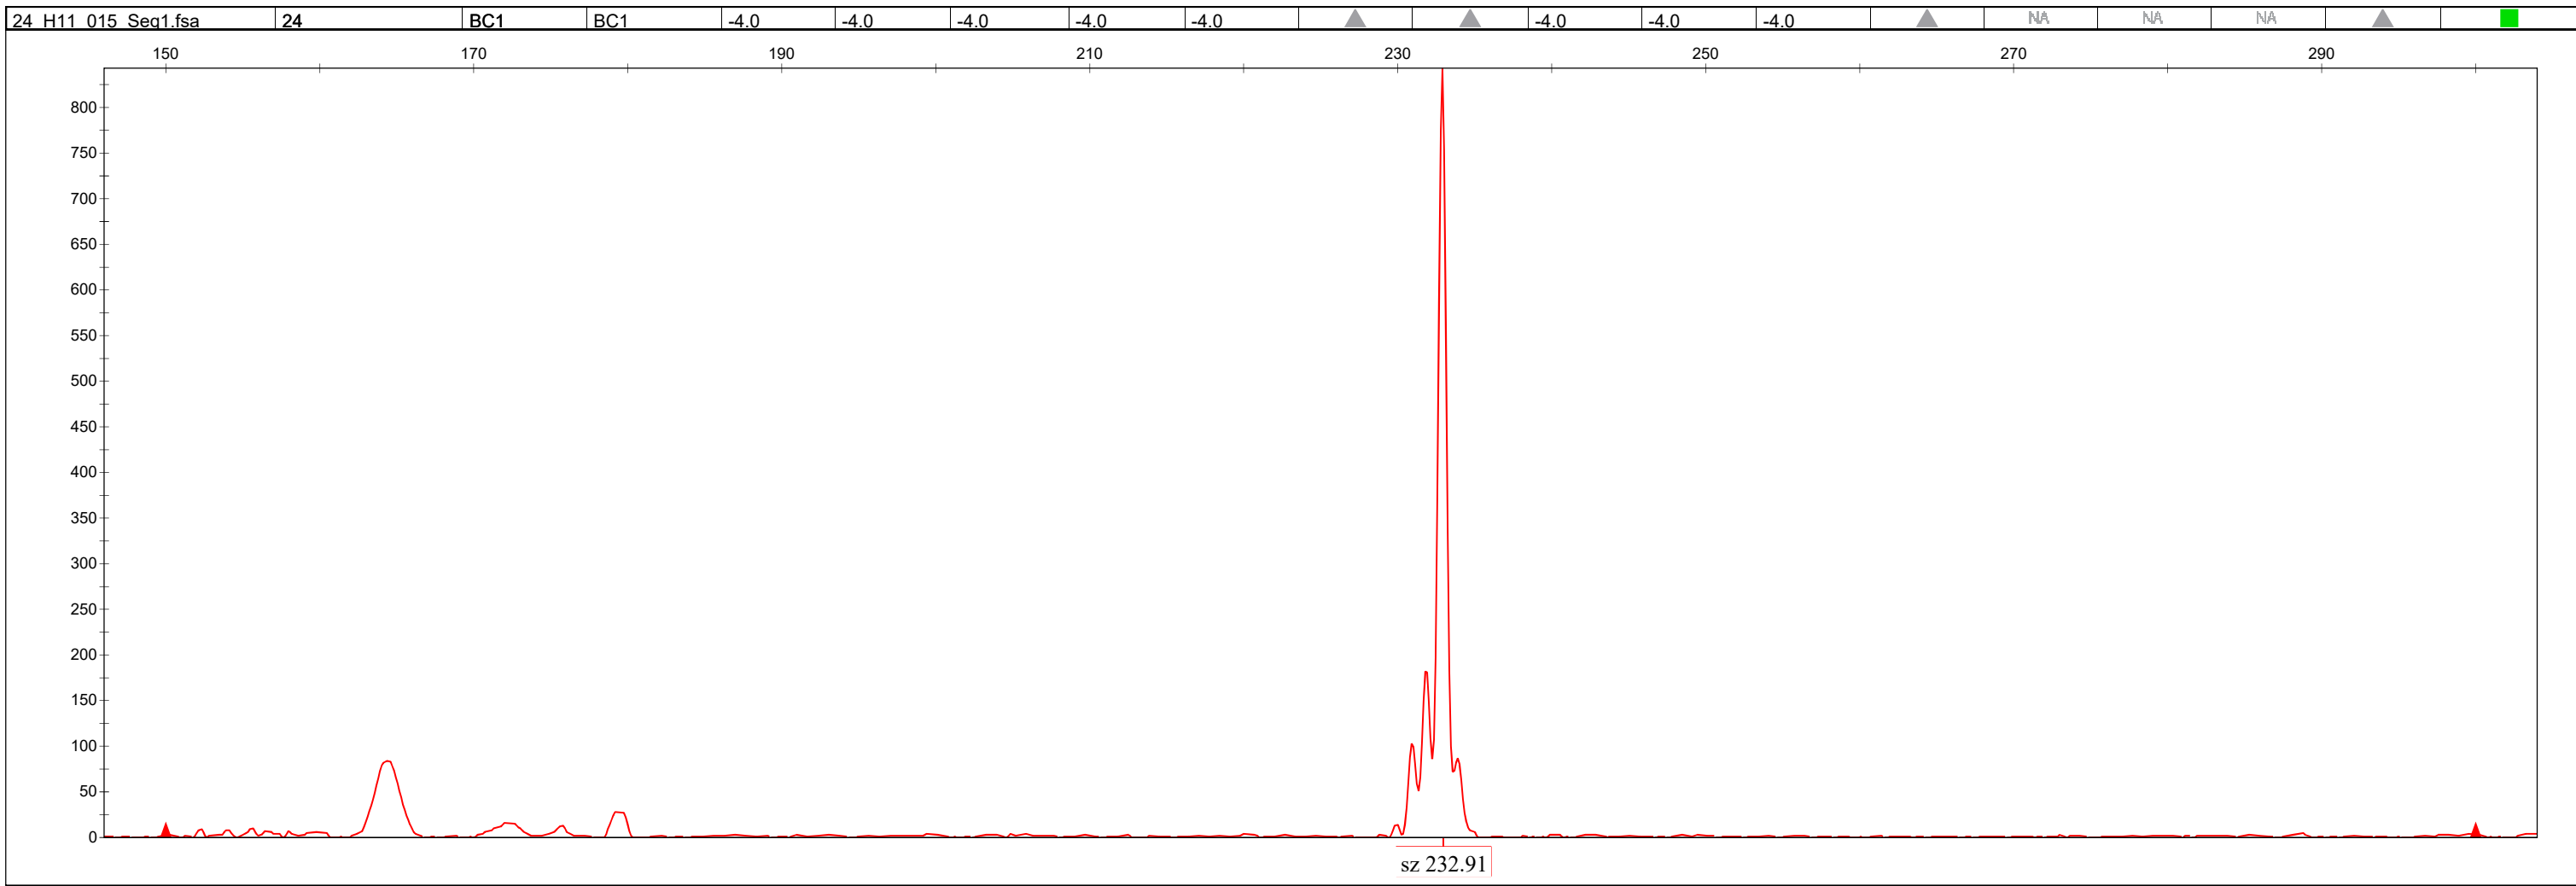

| Sample File         | Sample Name | Panel | Marker | OS   | SHP  | OBA  | SPA  | SP   | BIN | PHR | LPH | SPU  | AN   | BD | DP | NB | CC | OVL | GQ |
|---------------------|-------------|-------|--------|------|------|------|------|------|-----|-----|-----|------|------|----|----|----|----|-----|----|
| 25_A12_002_Seq1.fsa | 25          | BC1   | BC1    | -4.0 | -4.0 | -4.0 | -4.0 | -4.0 |     | NA  |     | -4.0 | -4.0 |    | NA | NA | NA |     |    |

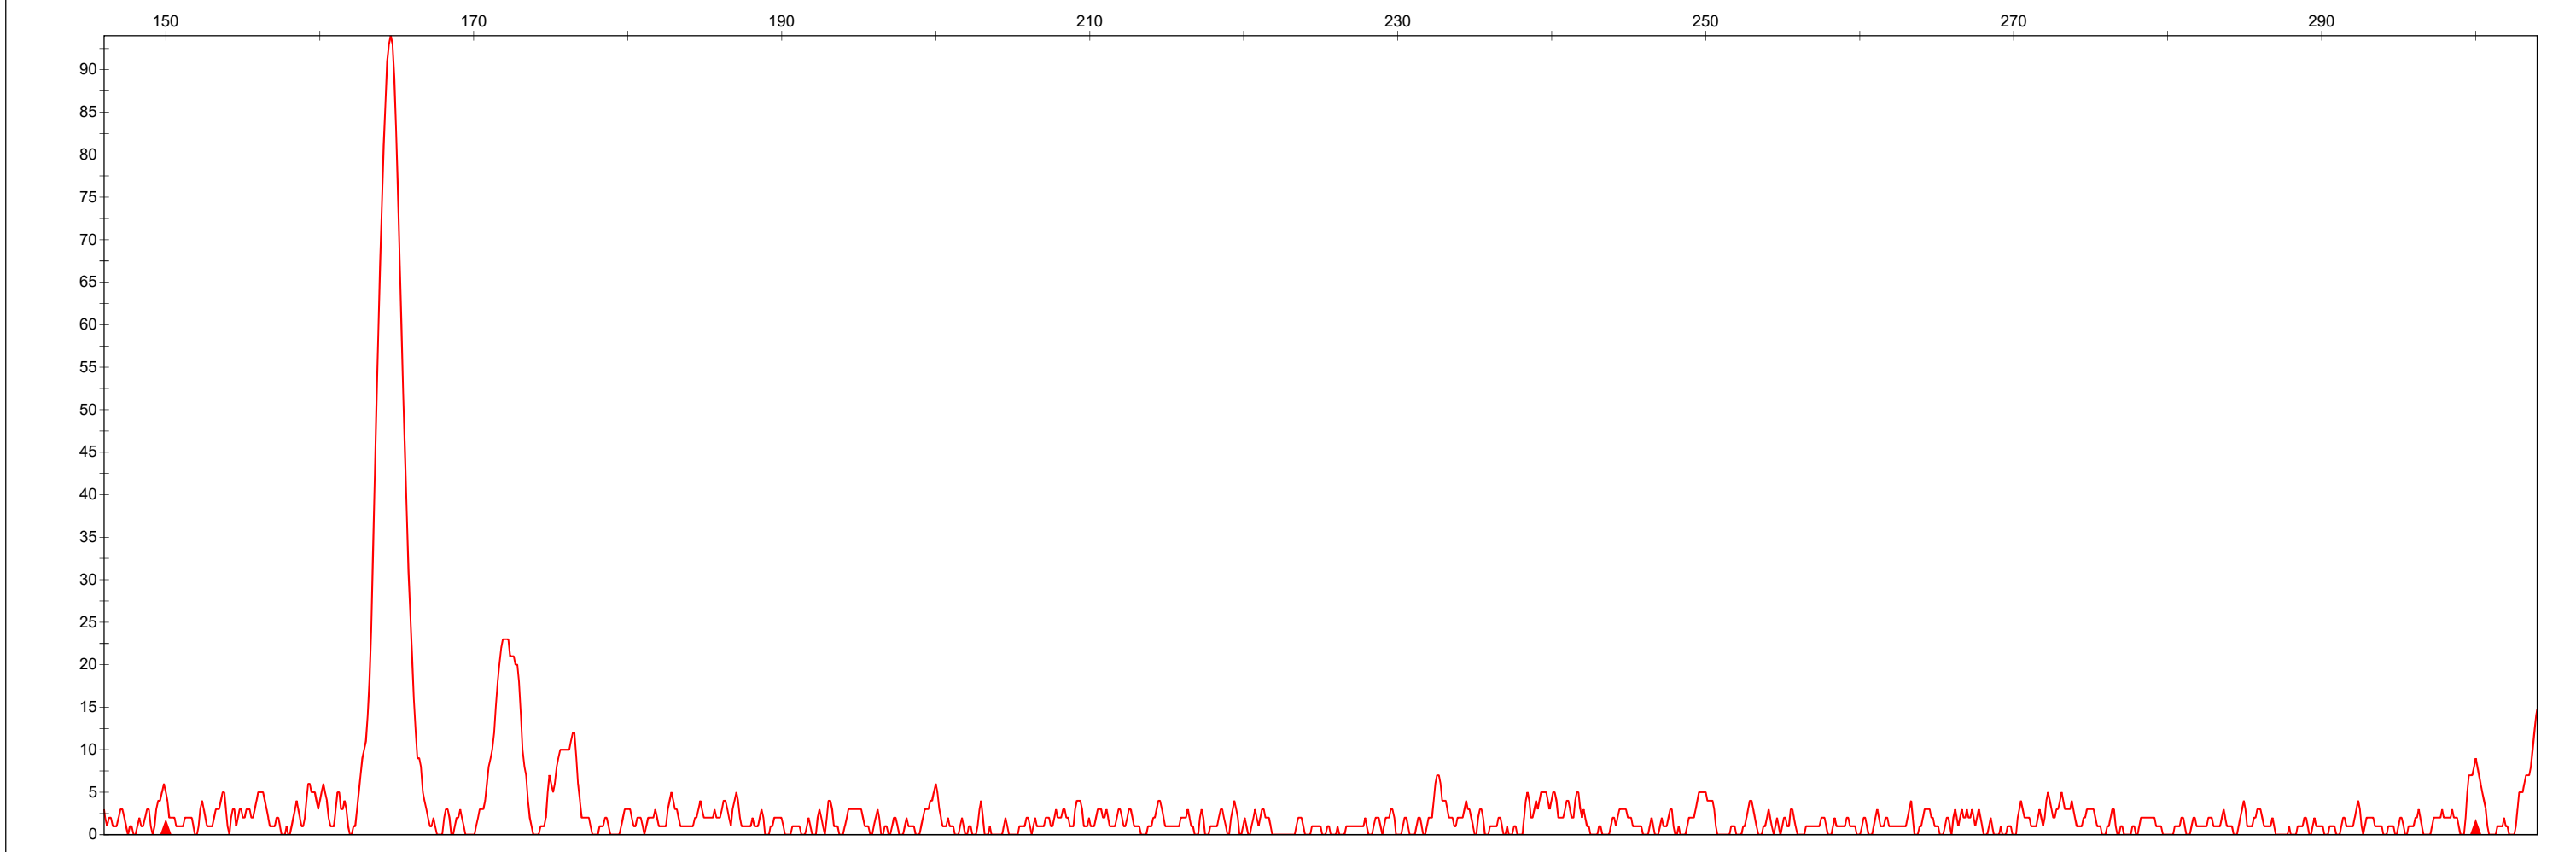

| Sample File         | Sample Name | Panel | Marker | OS | SHP | OBA | SPA | SP | BIN | PHR | LPH | SPU | AN | BD | DP | NB | CC | OVL | GQ |
|---------------------|-------------|-------|--------|----|-----|-----|-----|----|-----|-----|-----|-----|----|----|----|----|----|-----|----|
| 26_B12_004_Seq1.fsa | 26          | BC1   | BC1    |    |     |     |     |    |     | NA  |     |     |    |    | NA | NA | NA | NA  |    |

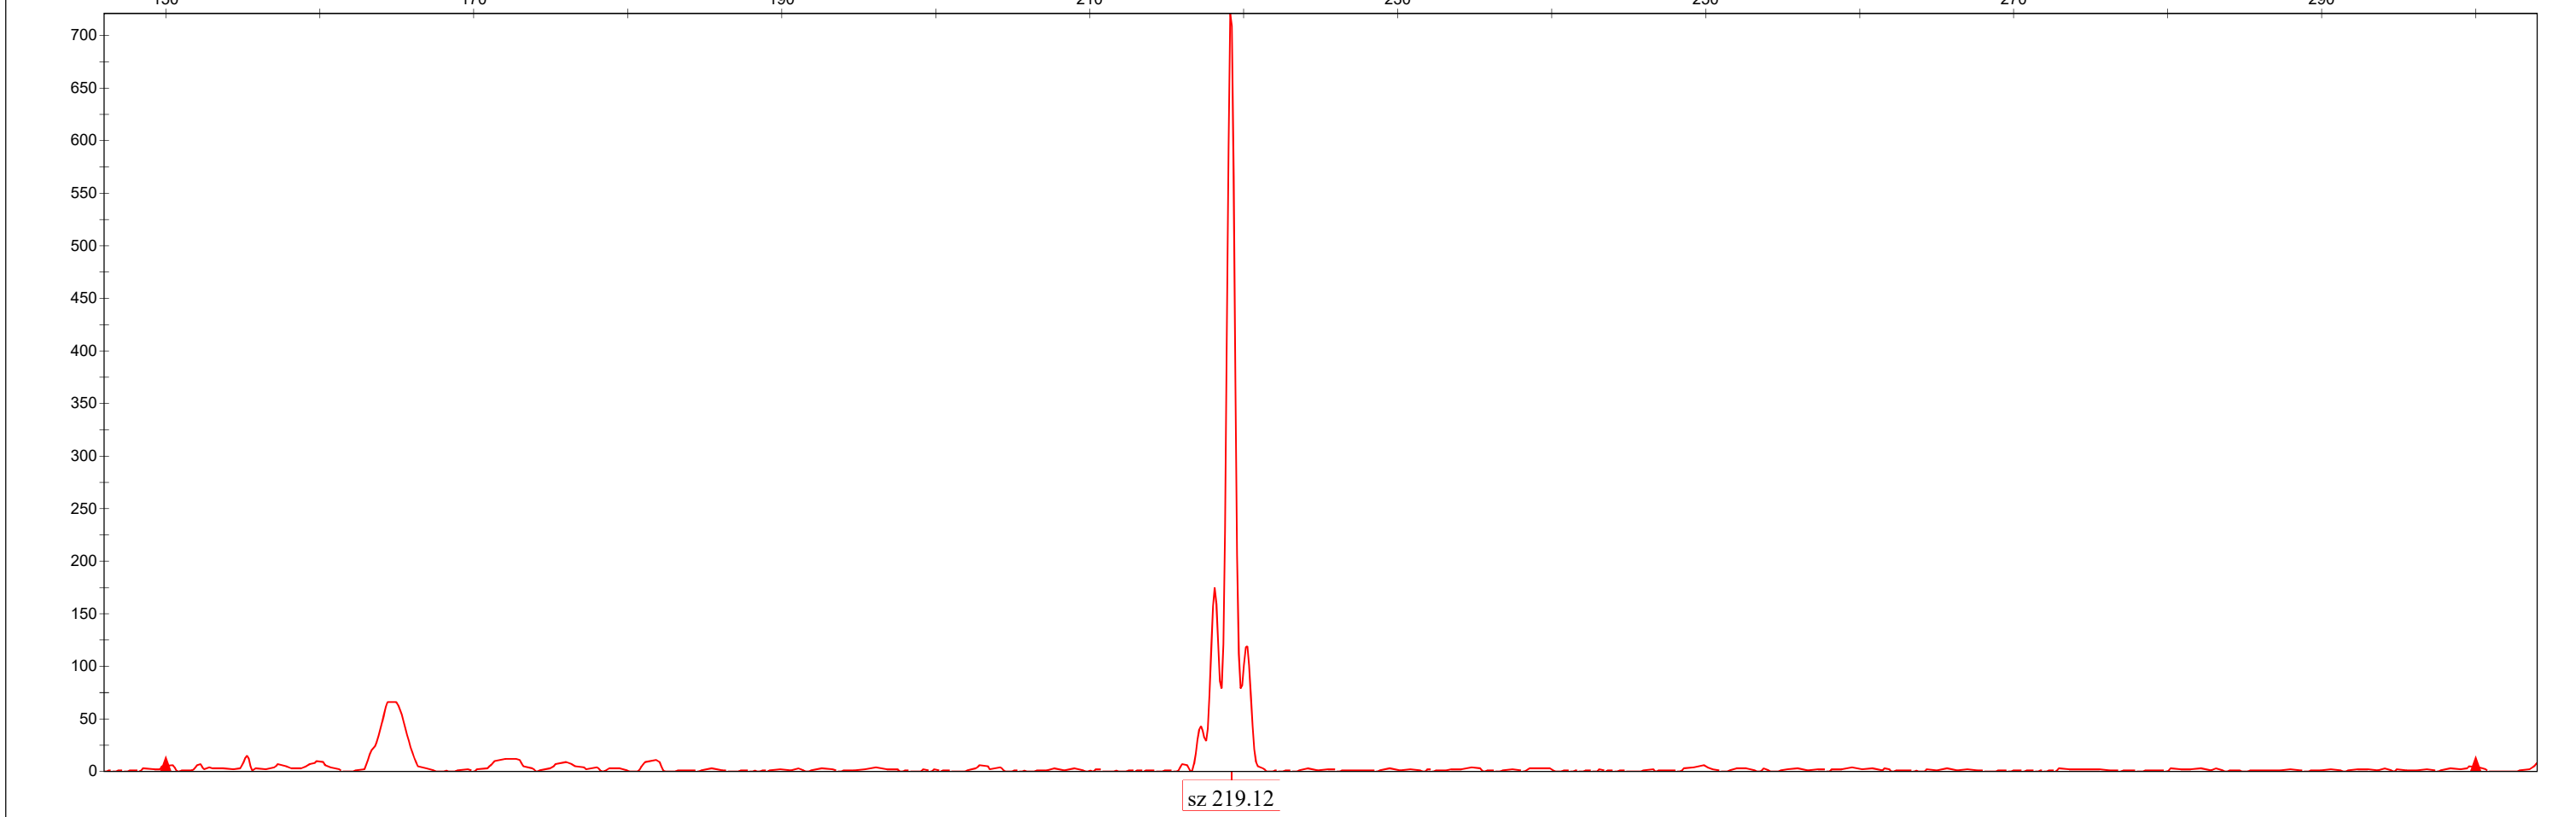

| Sample File         | Sample Name | Panel | Marker | OS   | SHP  | OBA  | SPA  | SP   | BIN | PHR | LPH | SPU  | AN   | BD | DP | NB | CC | OVL | GQ |
|---------------------|-------------|-------|--------|------|------|------|------|------|-----|-----|-----|------|------|----|----|----|----|-----|----|
| 27_C12_006_Seq1.fsa | 27          | BC1   | BC1    | -4.0 | -4.0 | -4.0 | -4.0 | -4.0 |     | NA  |     | -4.0 | -4.0 |    | NA | NA | NA |     |    |

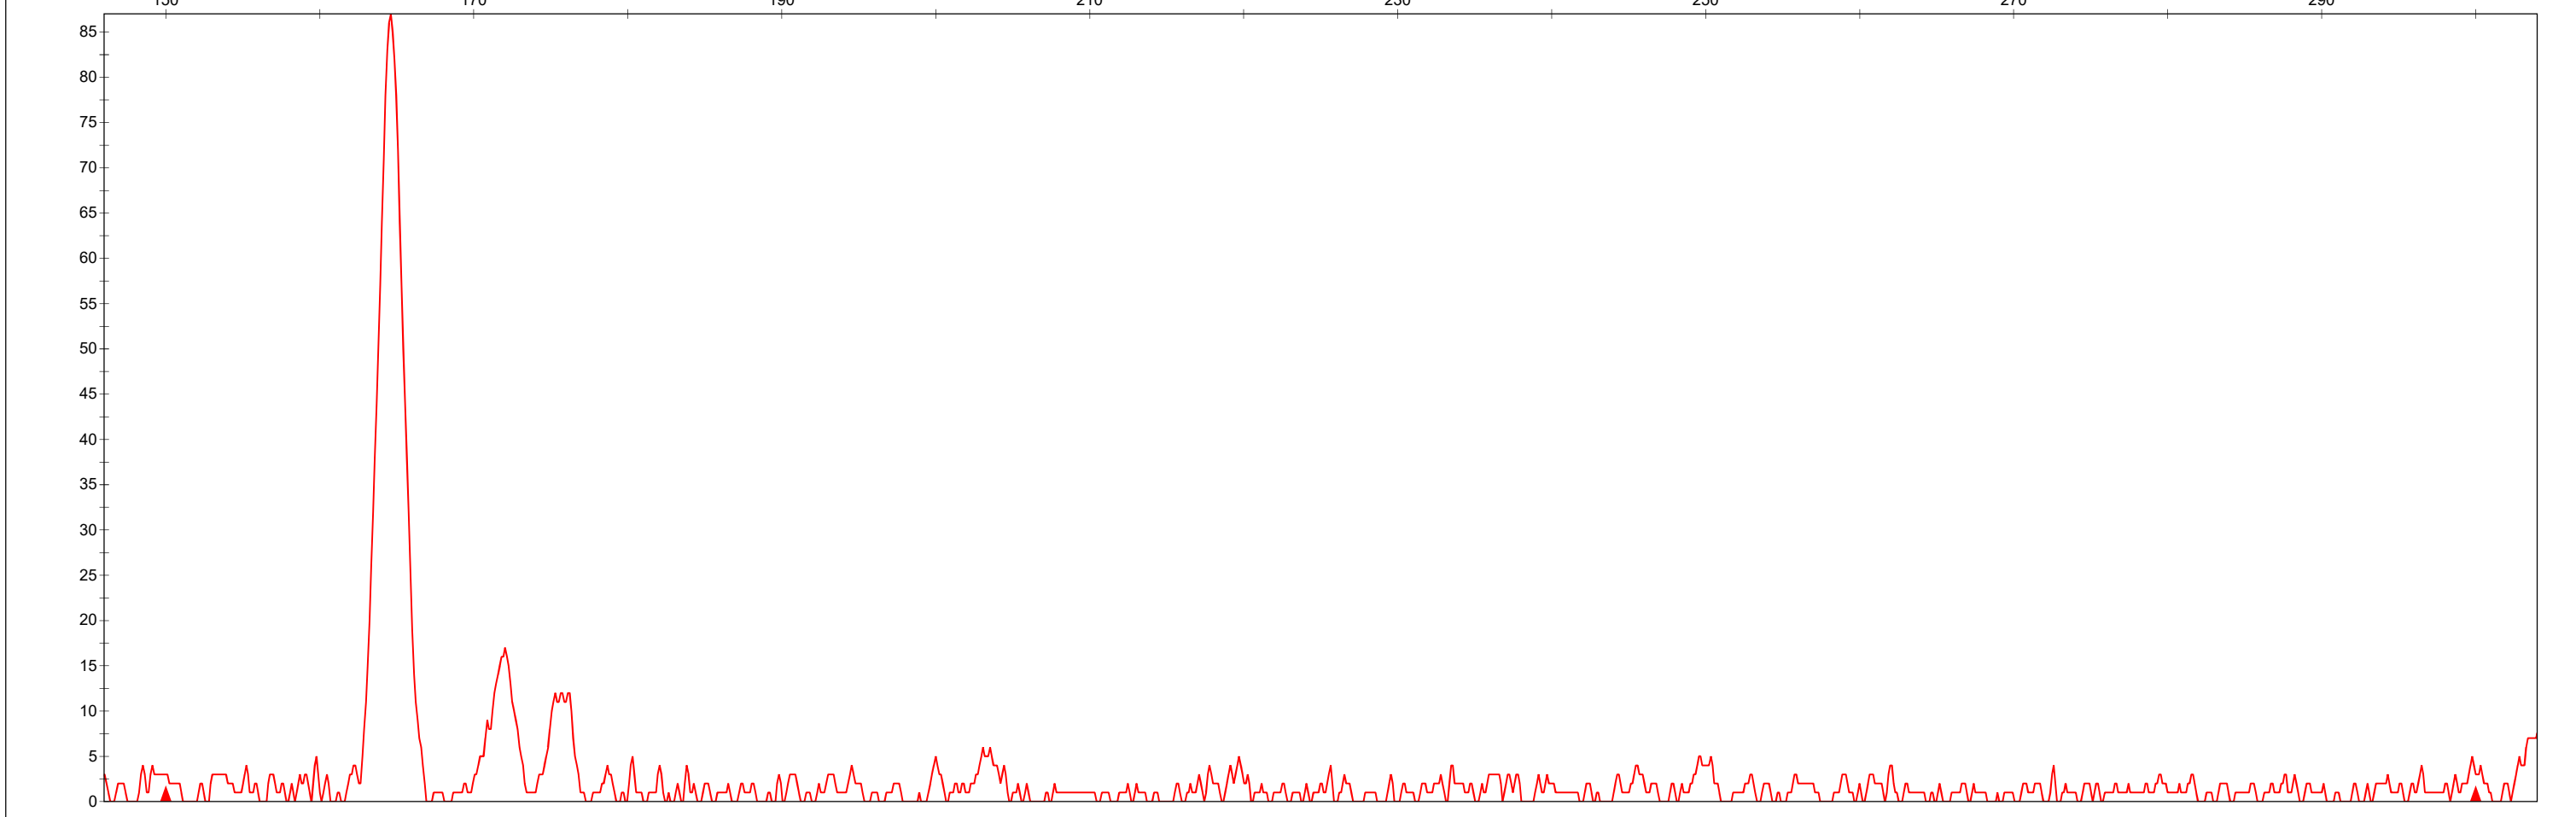

| Sample File         | Sample Name | Panel | Marker | OS   | SHP  | OBA  | SPA  | SP   | BIN | PHR | LPH | SPU  | AN   | BD | DP | NB | CC | OVL | GQ |
|---------------------|-------------|-------|--------|------|------|------|------|------|-----|-----|-----|------|------|----|----|----|----|-----|----|
| 28_D12_008_Seq1.fsa | 28          | BC1   | BC1    | -4.0 | -4.0 | -4.0 | -4.0 | -4.0 |     | NA  |     | -4.0 | -4.0 |    | NA | NA | NA |     |    |

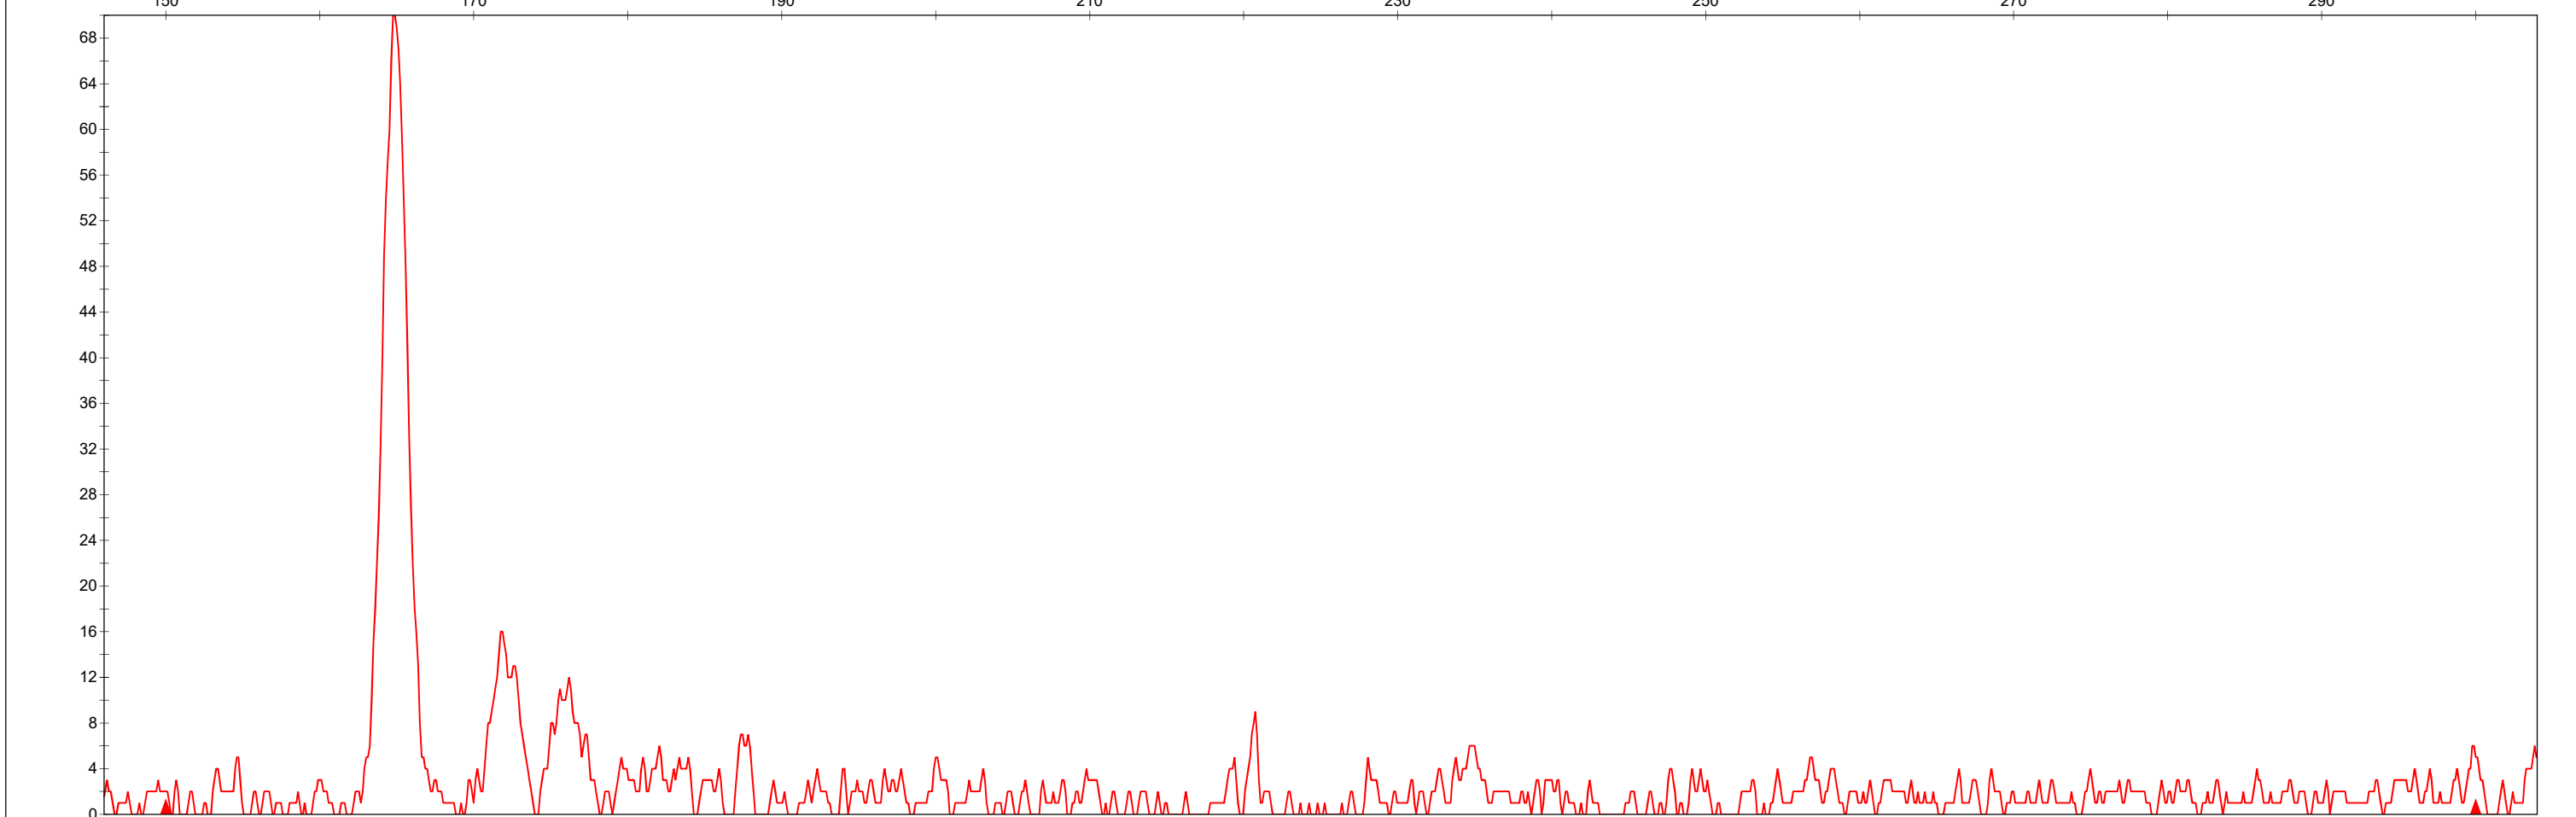

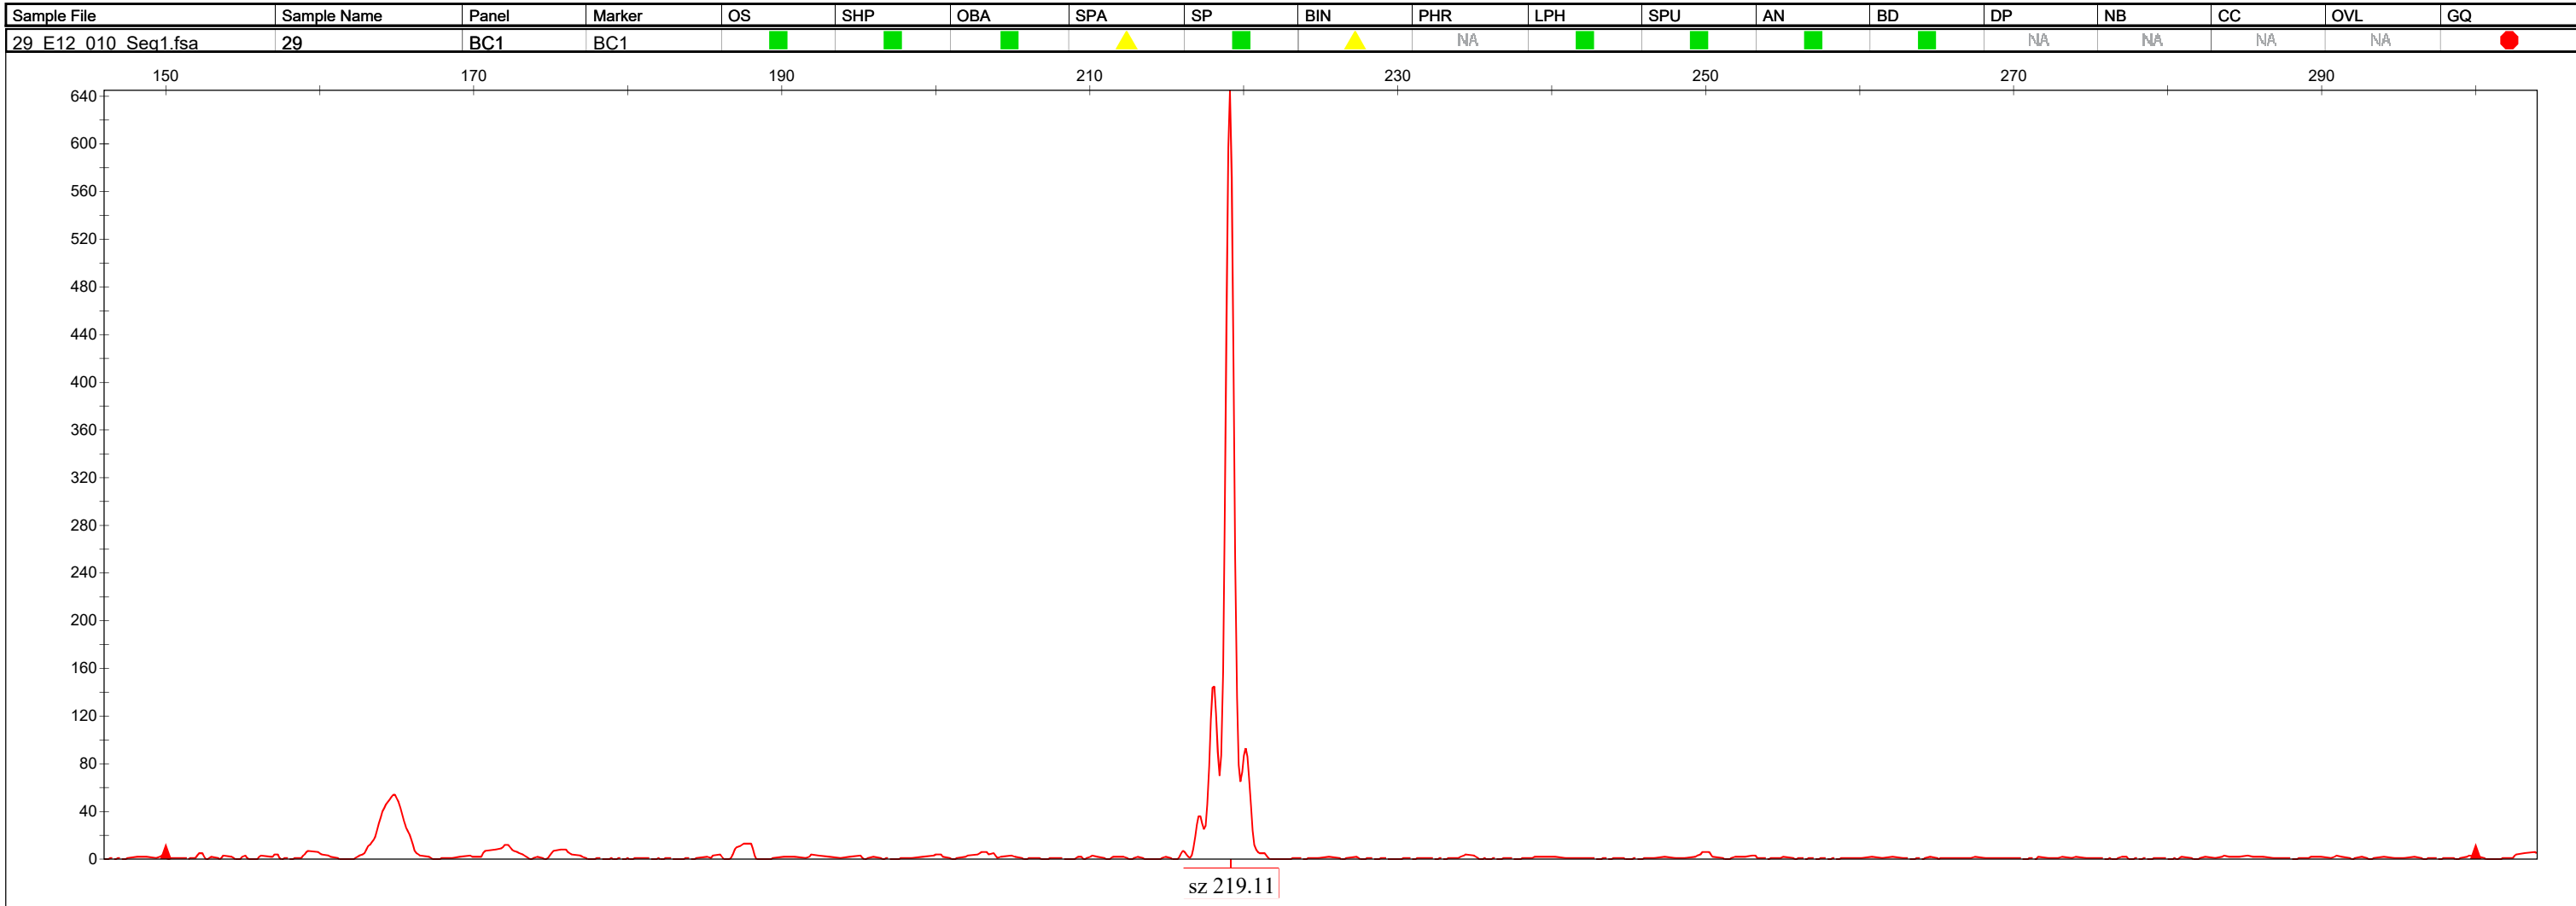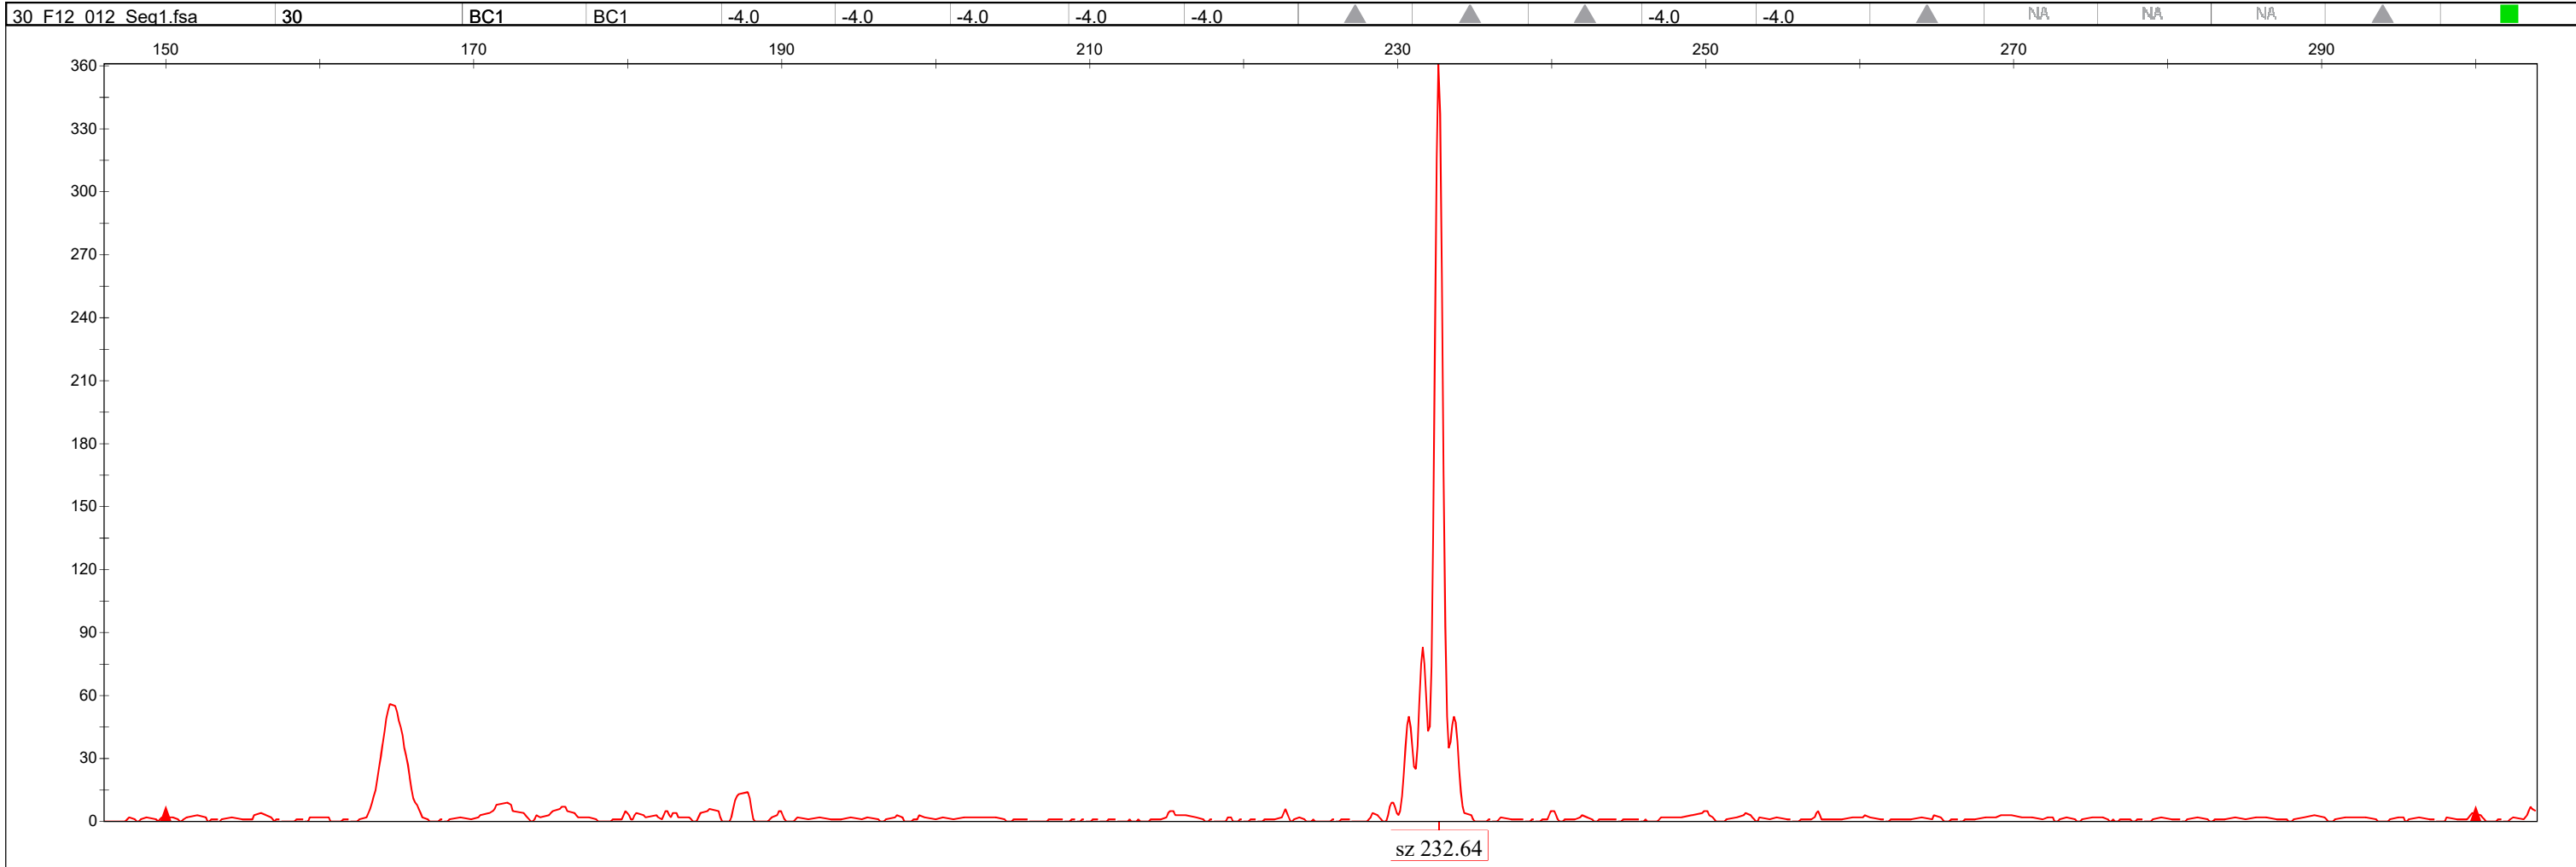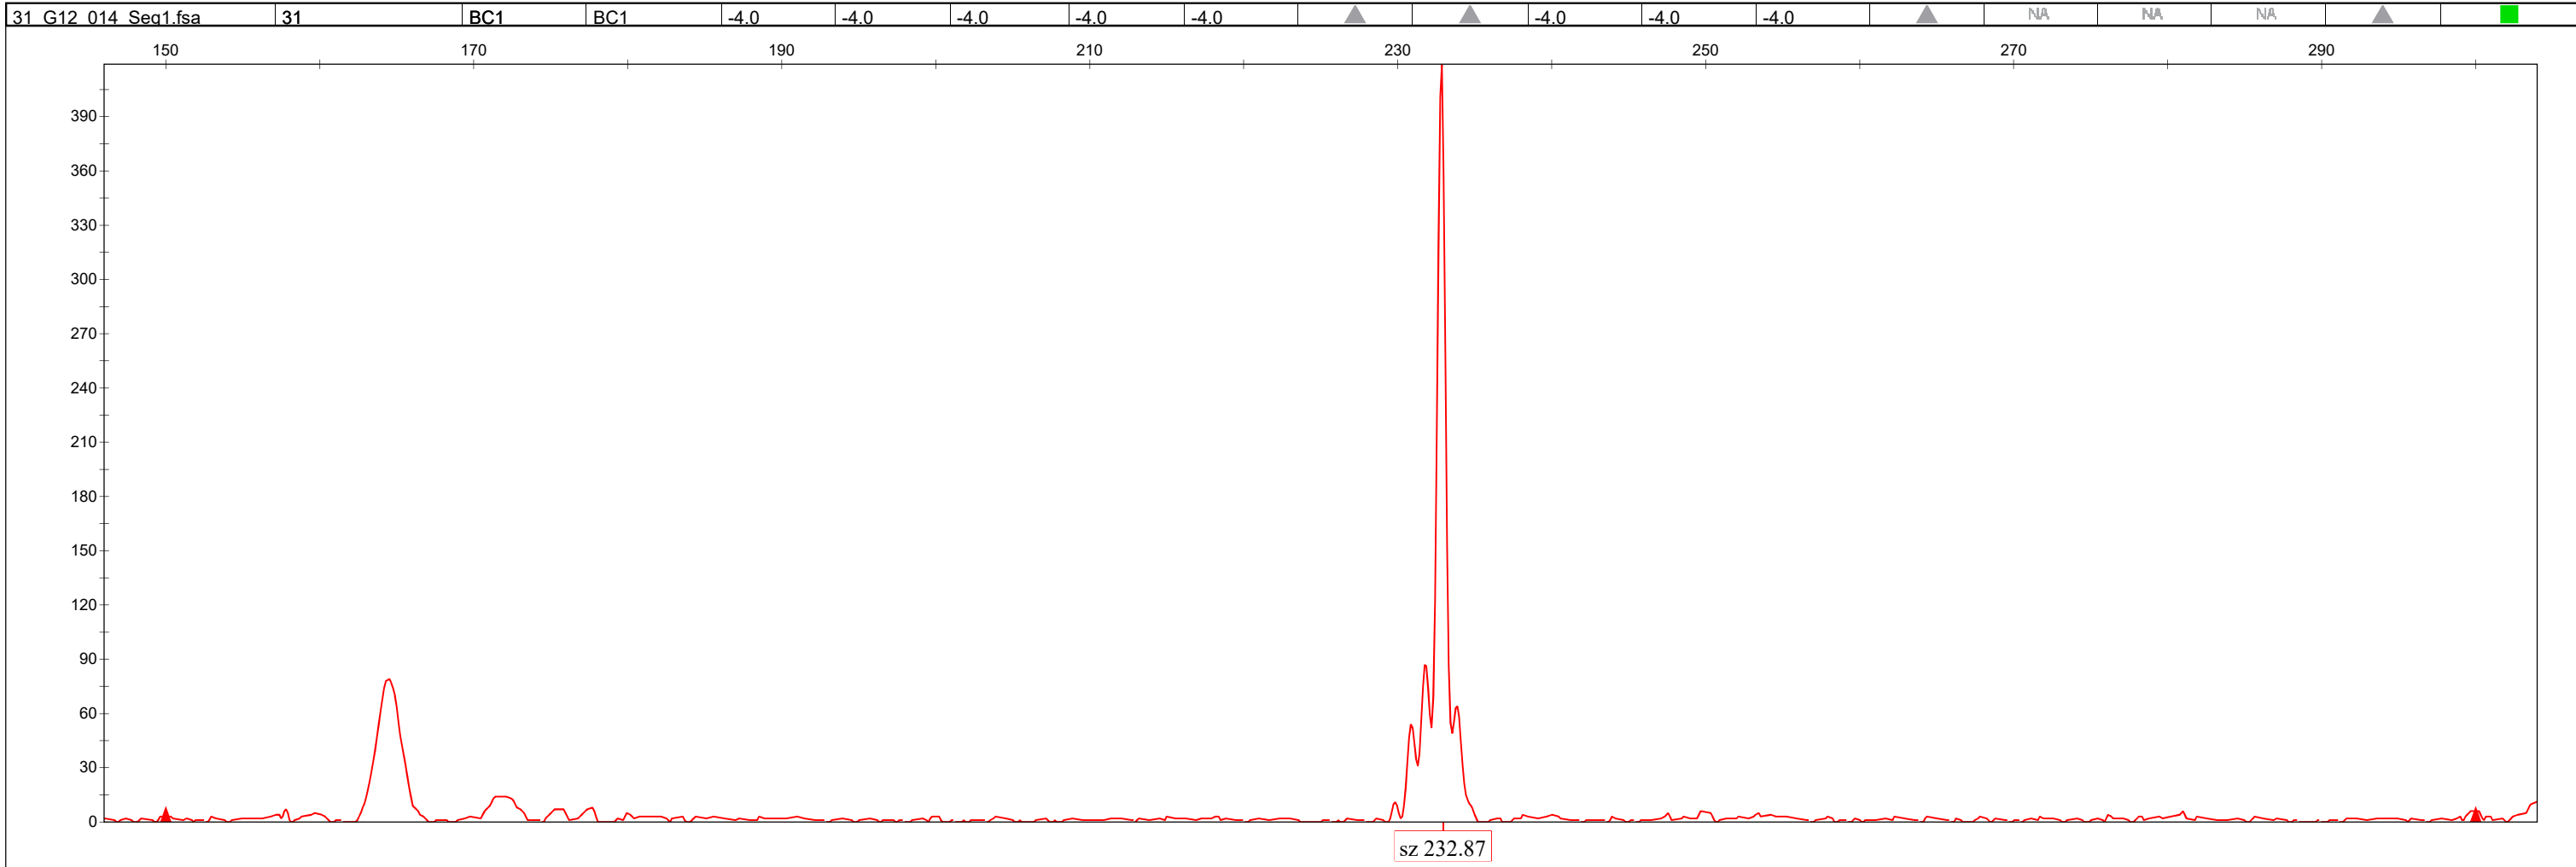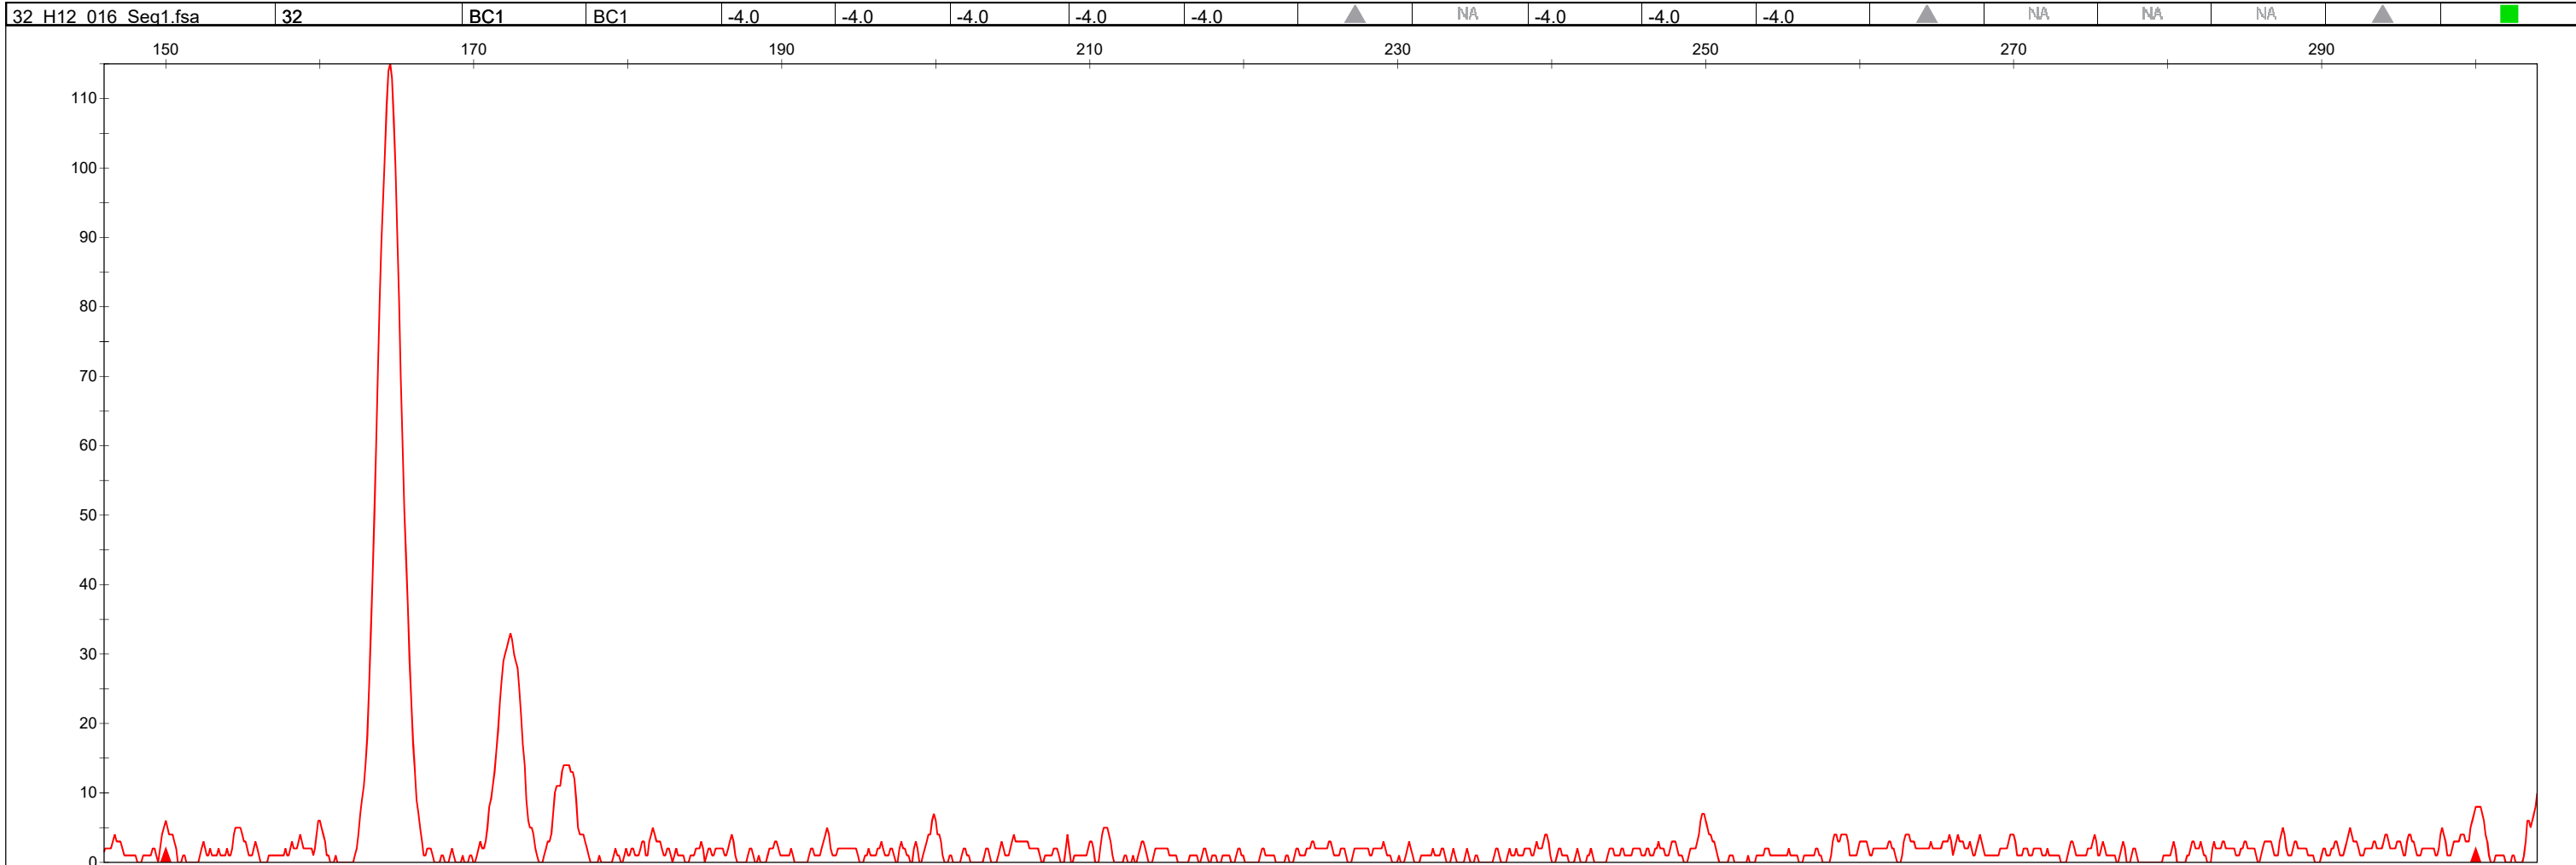



| Sample File         | Sample Name | Panel | Marker | OS   | SHP  | OBA  | SPA         | SP   | BIN         | PHR  | LPH  | SPU  | AN   | BD          | DP | NB | CC | OVL         | GQ          |
|---------------------|-------------|-------|--------|------|------|------|-------------|------|-------------|------|------|------|------|-------------|----|----|----|-------------|-------------|
| 33_A01_001_Seq1.fsa | 33          | BC1   | BC1    | -4.0 | -4.0 | -4.0 | <div></div> | -4.0 | <div></div> | -4.0 | -4.0 | -4.0 | -4.0 | <div></div> | NA | NA | NA | <div></div> | <div></div> |

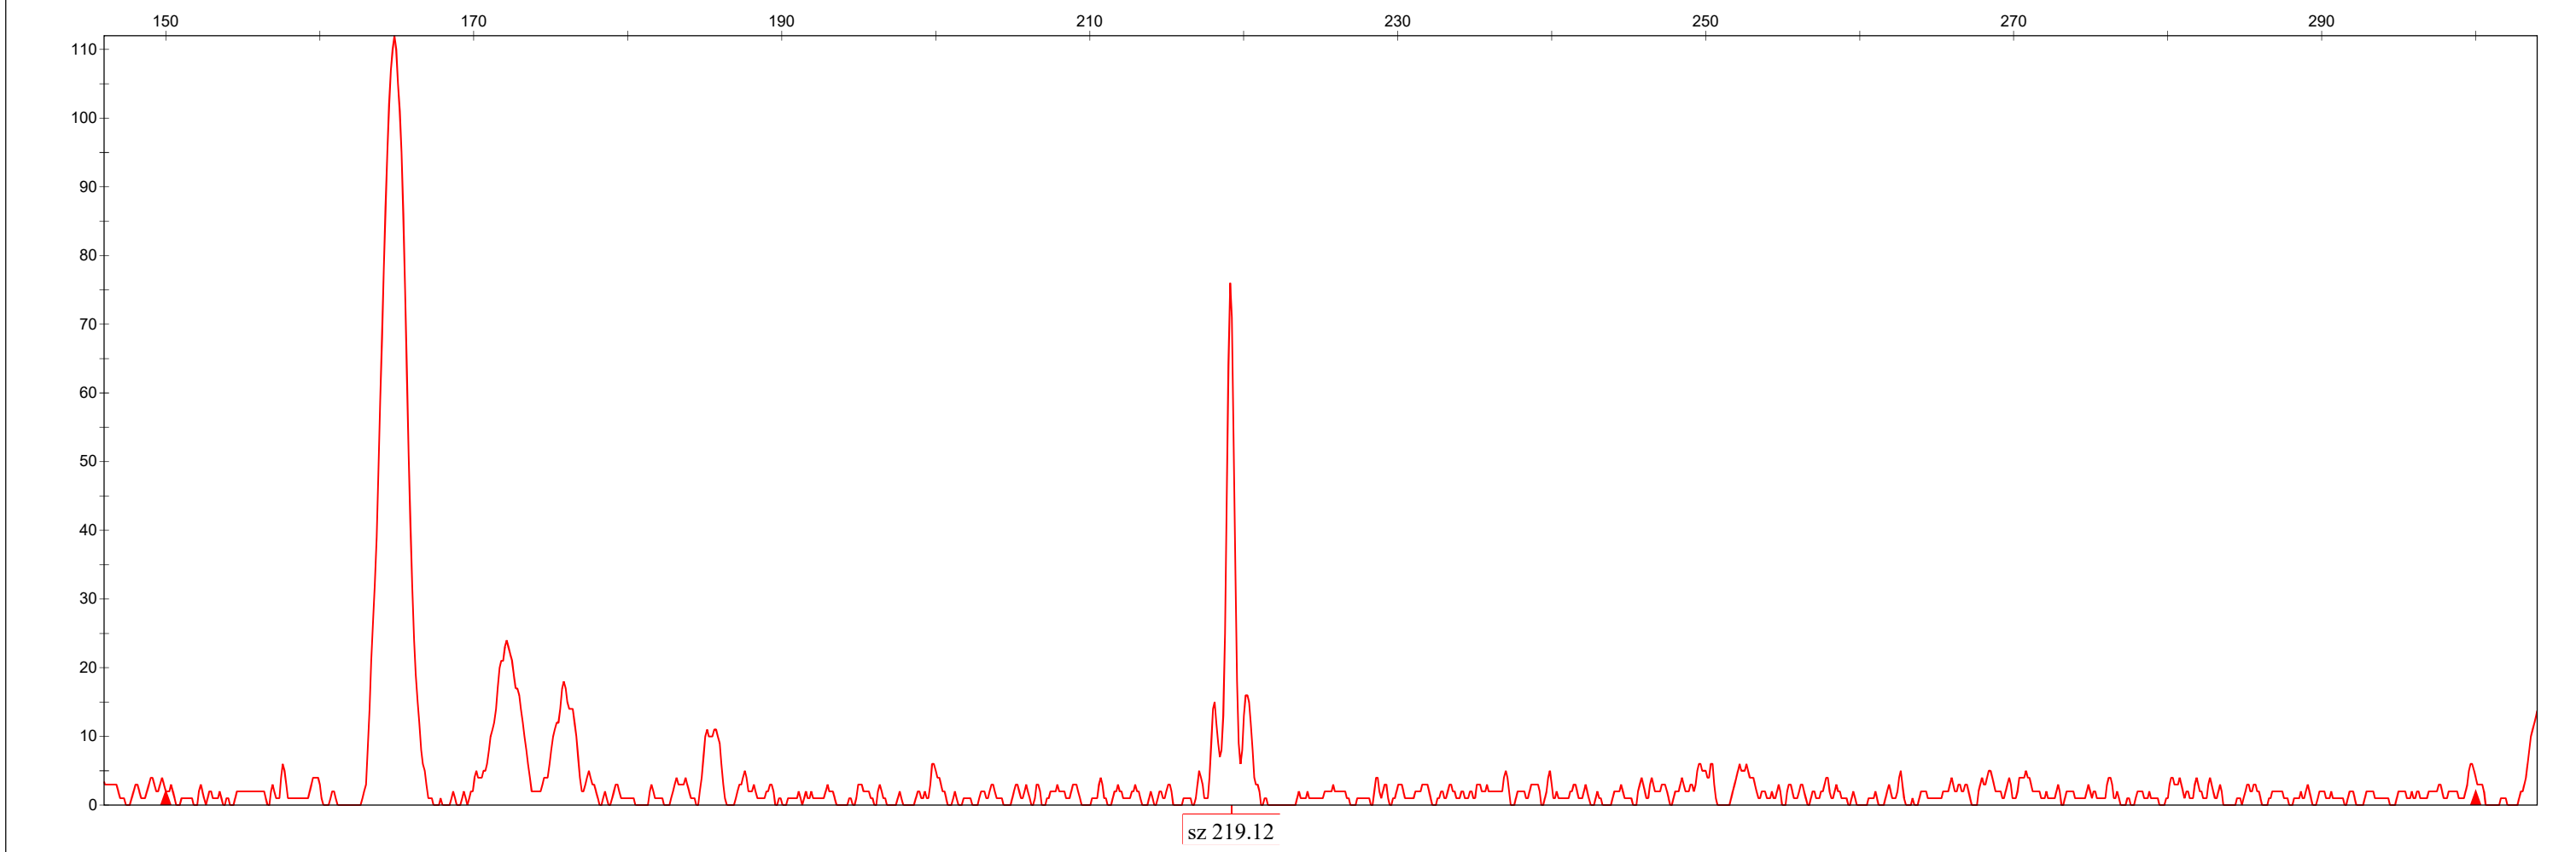

|                     |    |     |     |  |  |  |  |  |  |    |  |  |  |  |  |    |    |    |    |  |
|---------------------|----|-----|-----|--|--|--|--|--|--|----|--|--|--|--|--|----|----|----|----|--|
| 34_B01_003_Seq1.fsa | 34 | BC1 | BC1 |  |  |  |  |  |  | NA |  |  |  |  |  | NA | NA | NA | NA |  |
|---------------------|----|-----|-----|--|--|--|--|--|--|----|--|--|--|--|--|----|----|----|----|--|

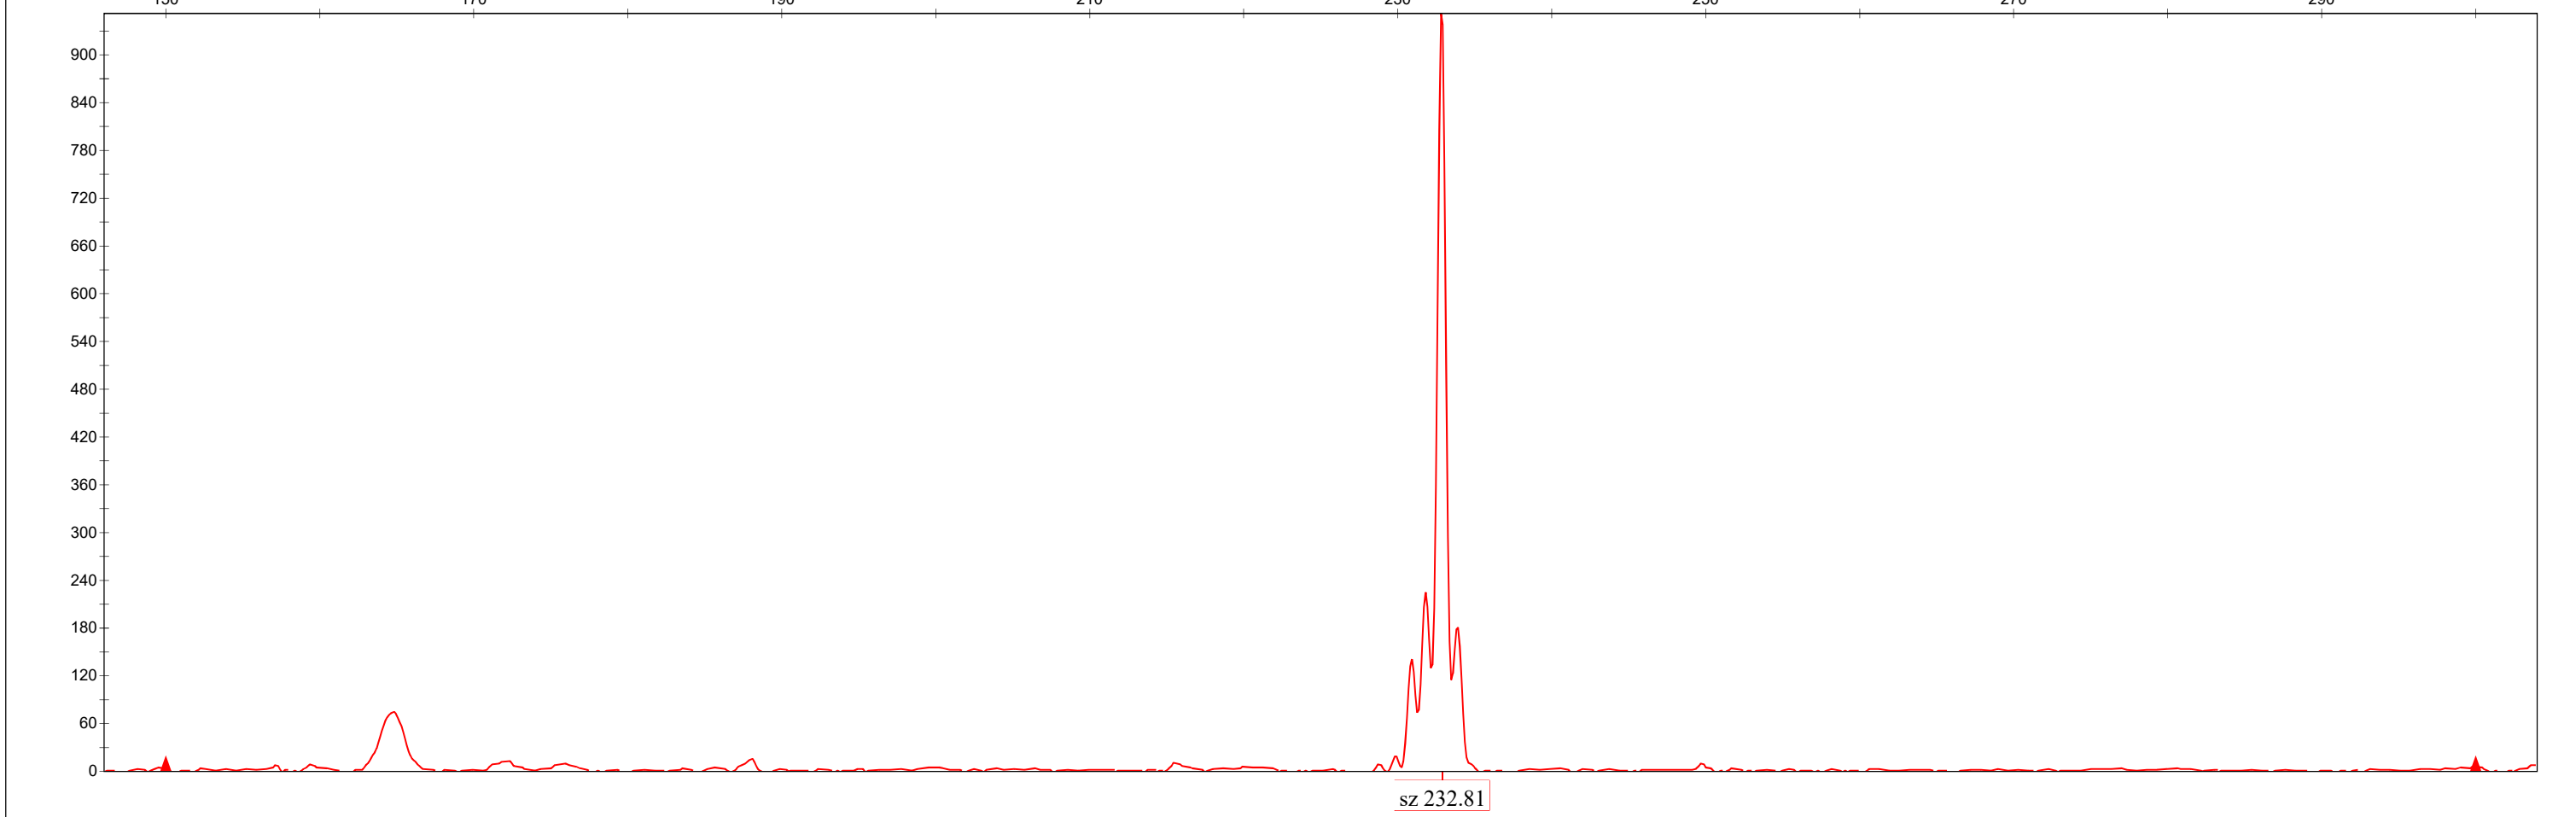

|                     |    |     |     |      |      |      |  |      |  |  |  |      |      |  |  |    |    |    |  |  |
|---------------------|----|-----|-----|------|------|------|--|------|--|--|--|------|------|--|--|----|----|----|--|--|
| 35_C01_005_Seq1.fsa | 35 | BC1 | BC1 | -4.0 | -4.0 | -4.0 |  | -4.0 |  |  |  | -4.0 | -4.0 |  |  | NA | NA | NA |  |  |
|---------------------|----|-----|-----|------|------|------|--|------|--|--|--|------|------|--|--|----|----|----|--|--|

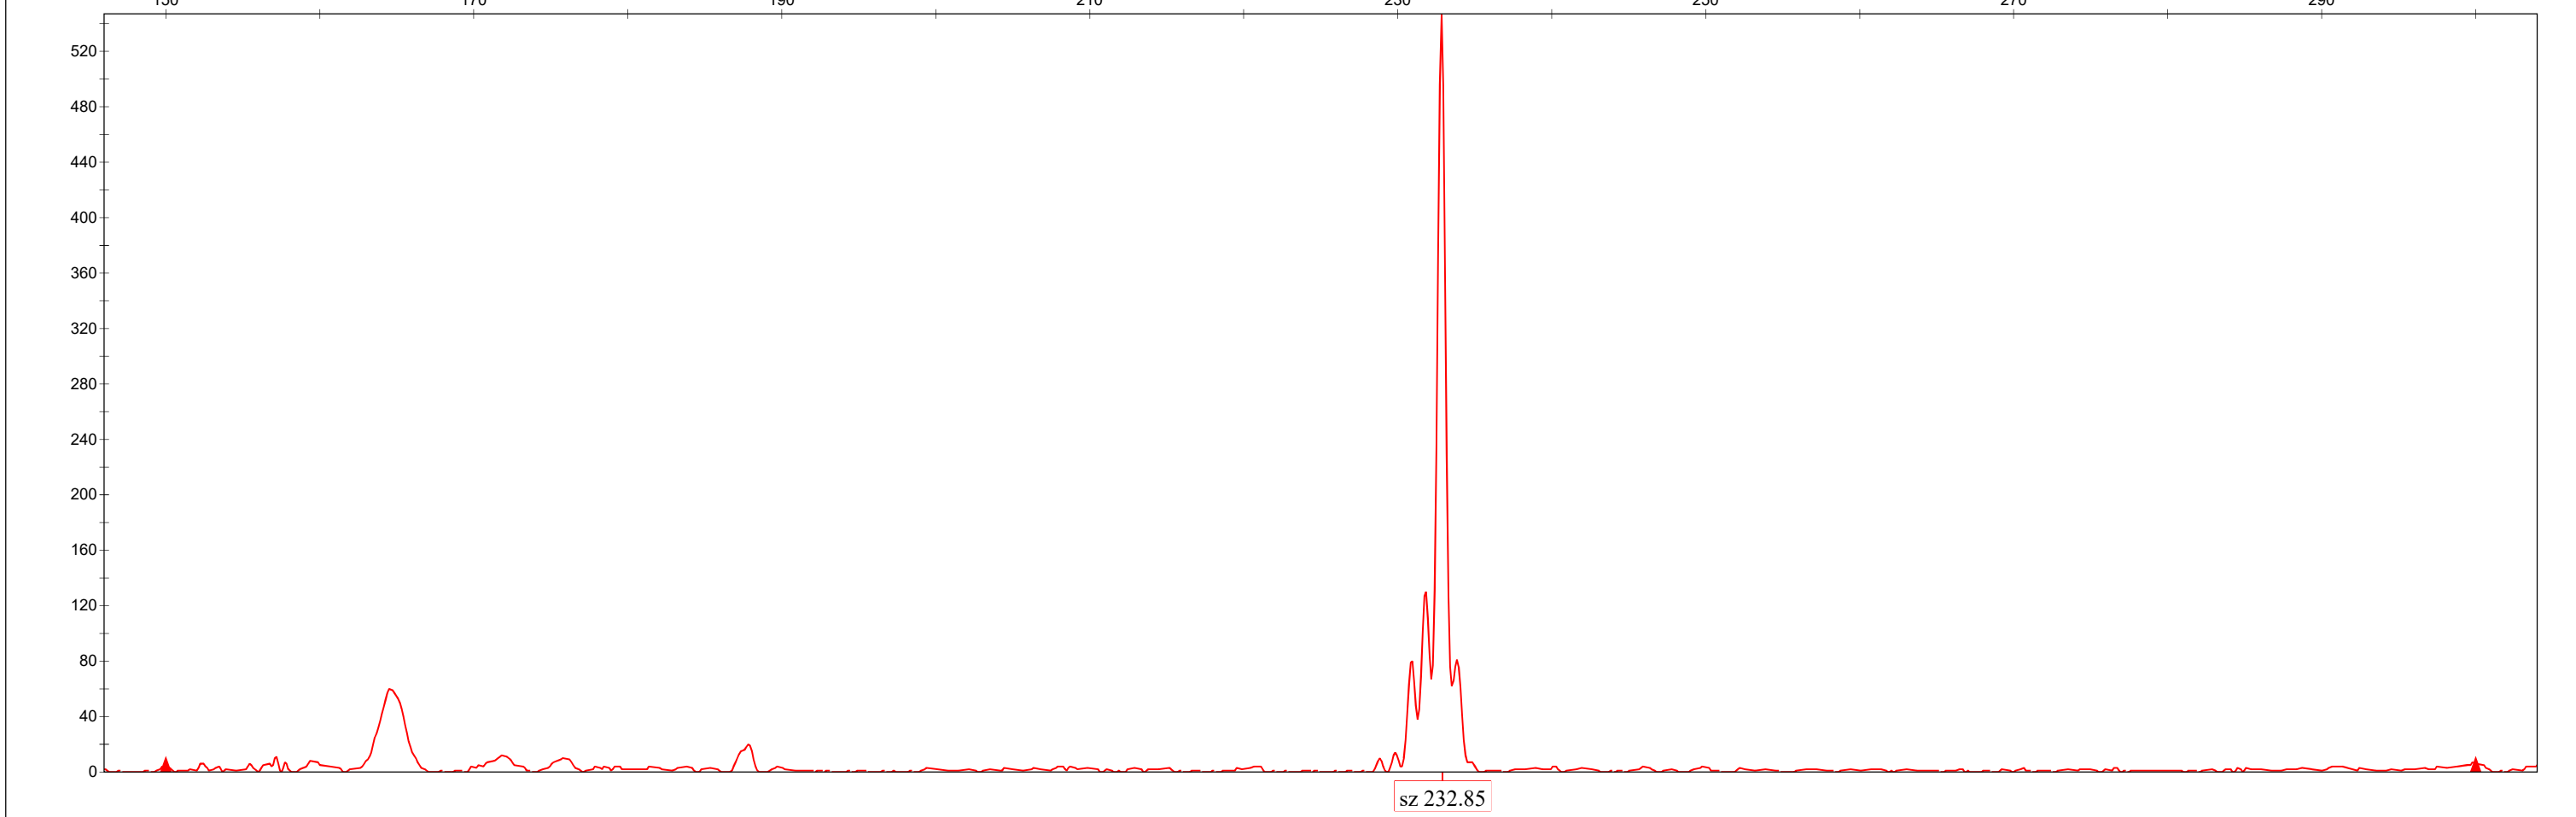

|                     |    |     |     |      |      |      |  |      |  |  |  |      |      |  |  |    |    |    |  |  |
|---------------------|----|-----|-----|------|------|------|--|------|--|--|--|------|------|--|--|----|----|----|--|--|
| 36_D01_007_Seq1.fsa | 36 | BC1 | BC1 | -4.0 | -4.0 | -4.0 |  | -4.0 |  |  |  | -4.0 | -4.0 |  |  | NA | NA | NA |  |  |
|---------------------|----|-----|-----|------|------|------|--|------|--|--|--|------|------|--|--|----|----|----|--|--|

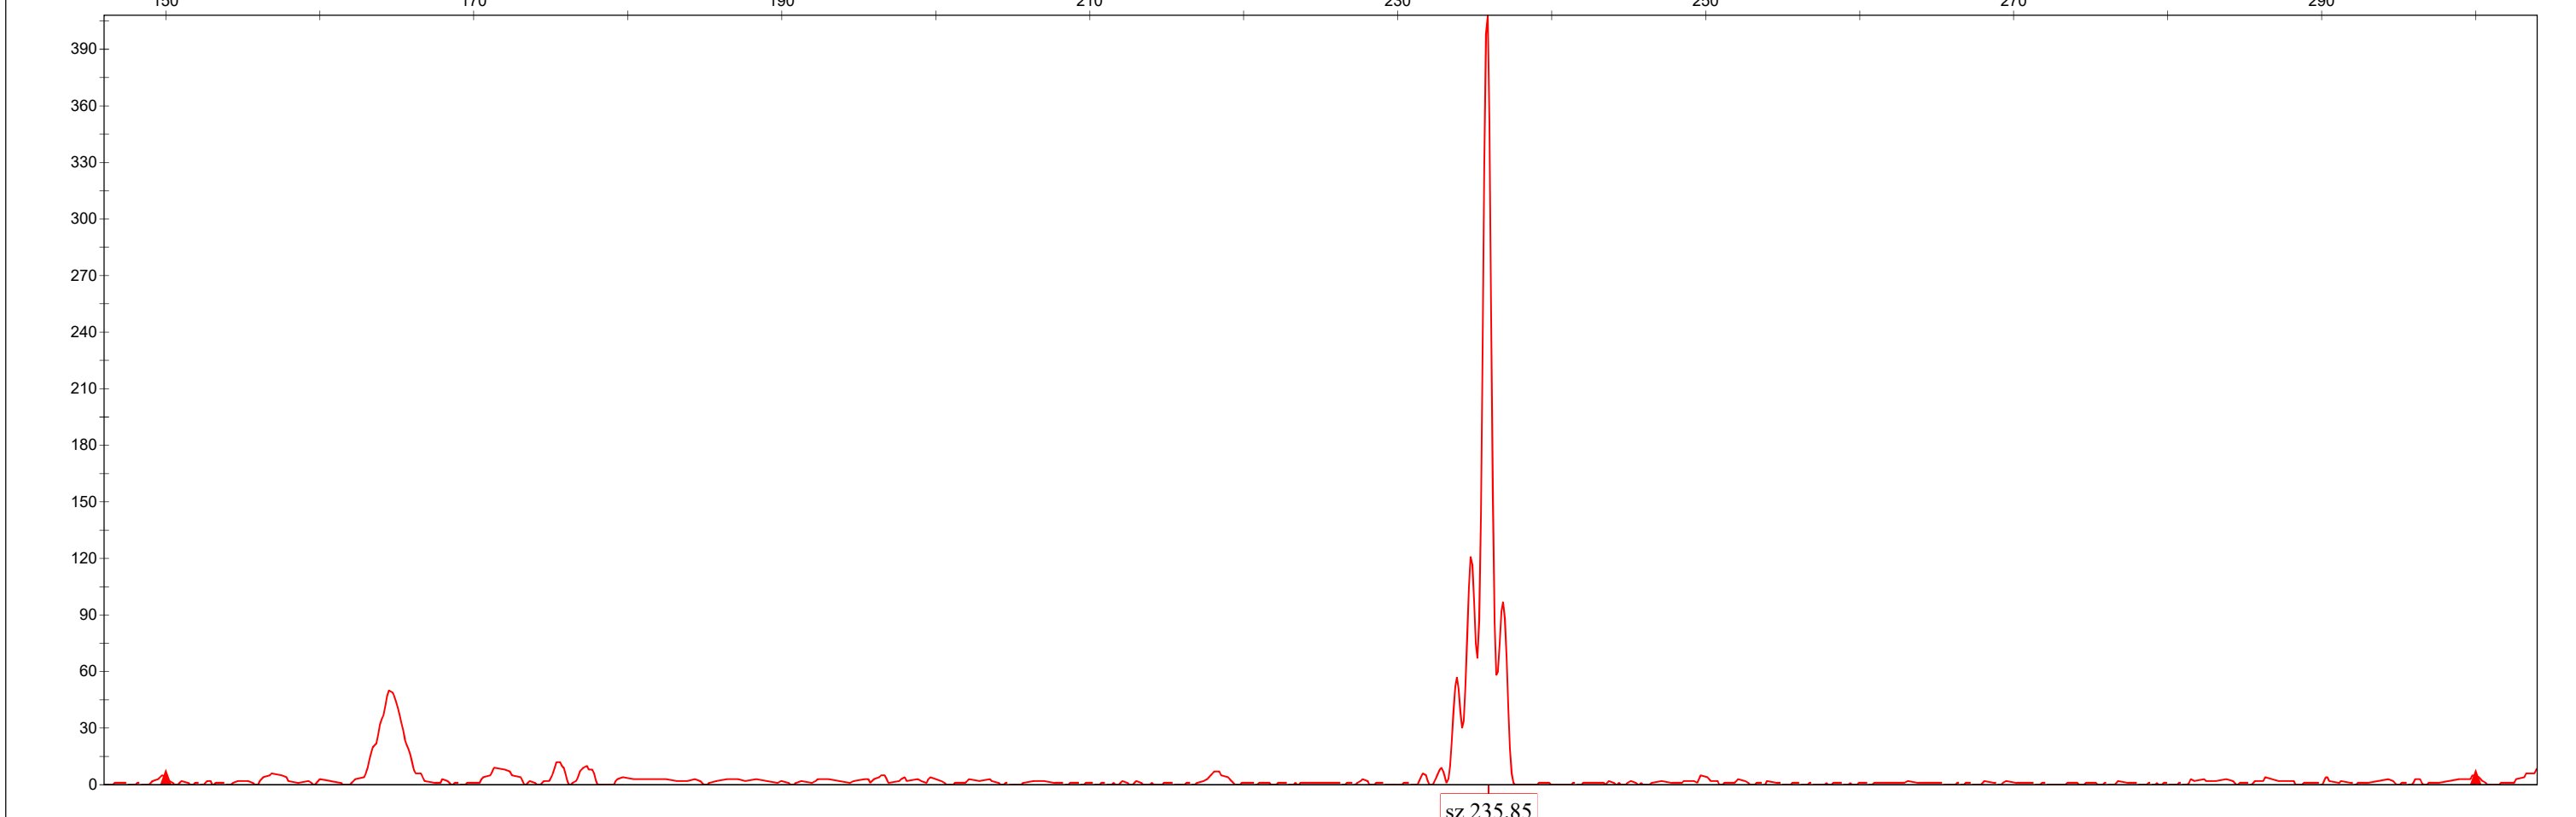

| Sample File         | Sample Name | Panel | Marker | OS   | SHP  | OBA  | SPA | SP   | BIN | PHR | LPH  | SPU | AN   | BD   | DP | NB | CC | OVL | GQ |
|---------------------|-------------|-------|--------|------|------|------|-----|------|-----|-----|------|-----|------|------|----|----|----|-----|----|
| 37_E01_009_Seq1.fsa | 37          | BC1   | BC1    | -4.0 | -4.0 | -4.0 | ▲   | -4.0 | ▲   | ▲   | -4.0 | ▲   | -4.0 | -4.0 | NA | NA | NA | ▲   | ■  |

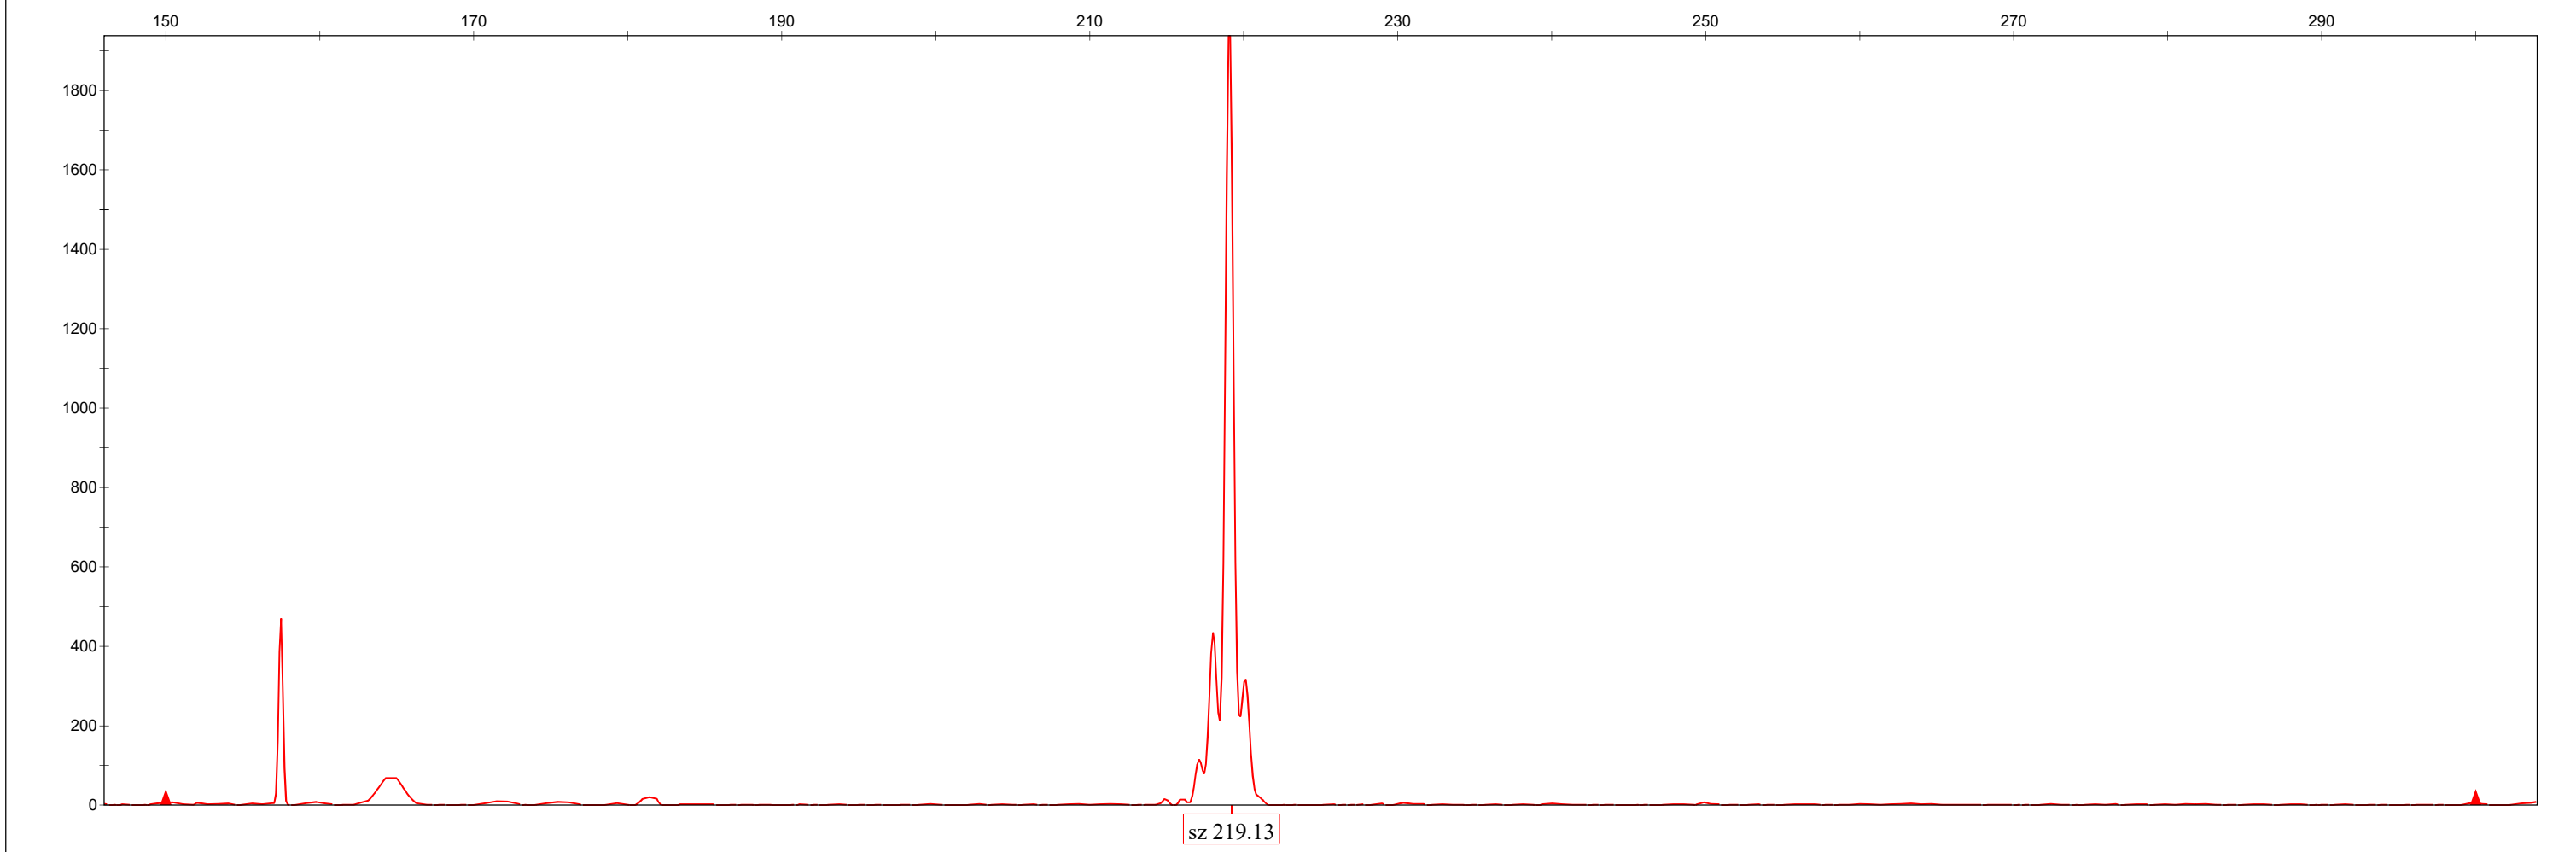

|                     |    |     |     |  |  |  |  |  |  |  |  |  |  |  |  |  |  |  |  |  |
|---------------------|----|-----|-----|--|--|--|--|--|--|--|--|--|--|--|--|--|--|--|--|--|
| 38_F01_011_Seq1.fsa | 38 | BC1 | BC1 |  |  |  |  |  |  |  |  |  |  |  |  |  |  |  |  |  |
|---------------------|----|-----|-----|--|--|--|--|--|--|--|--|--|--|--|--|--|--|--|--|--|

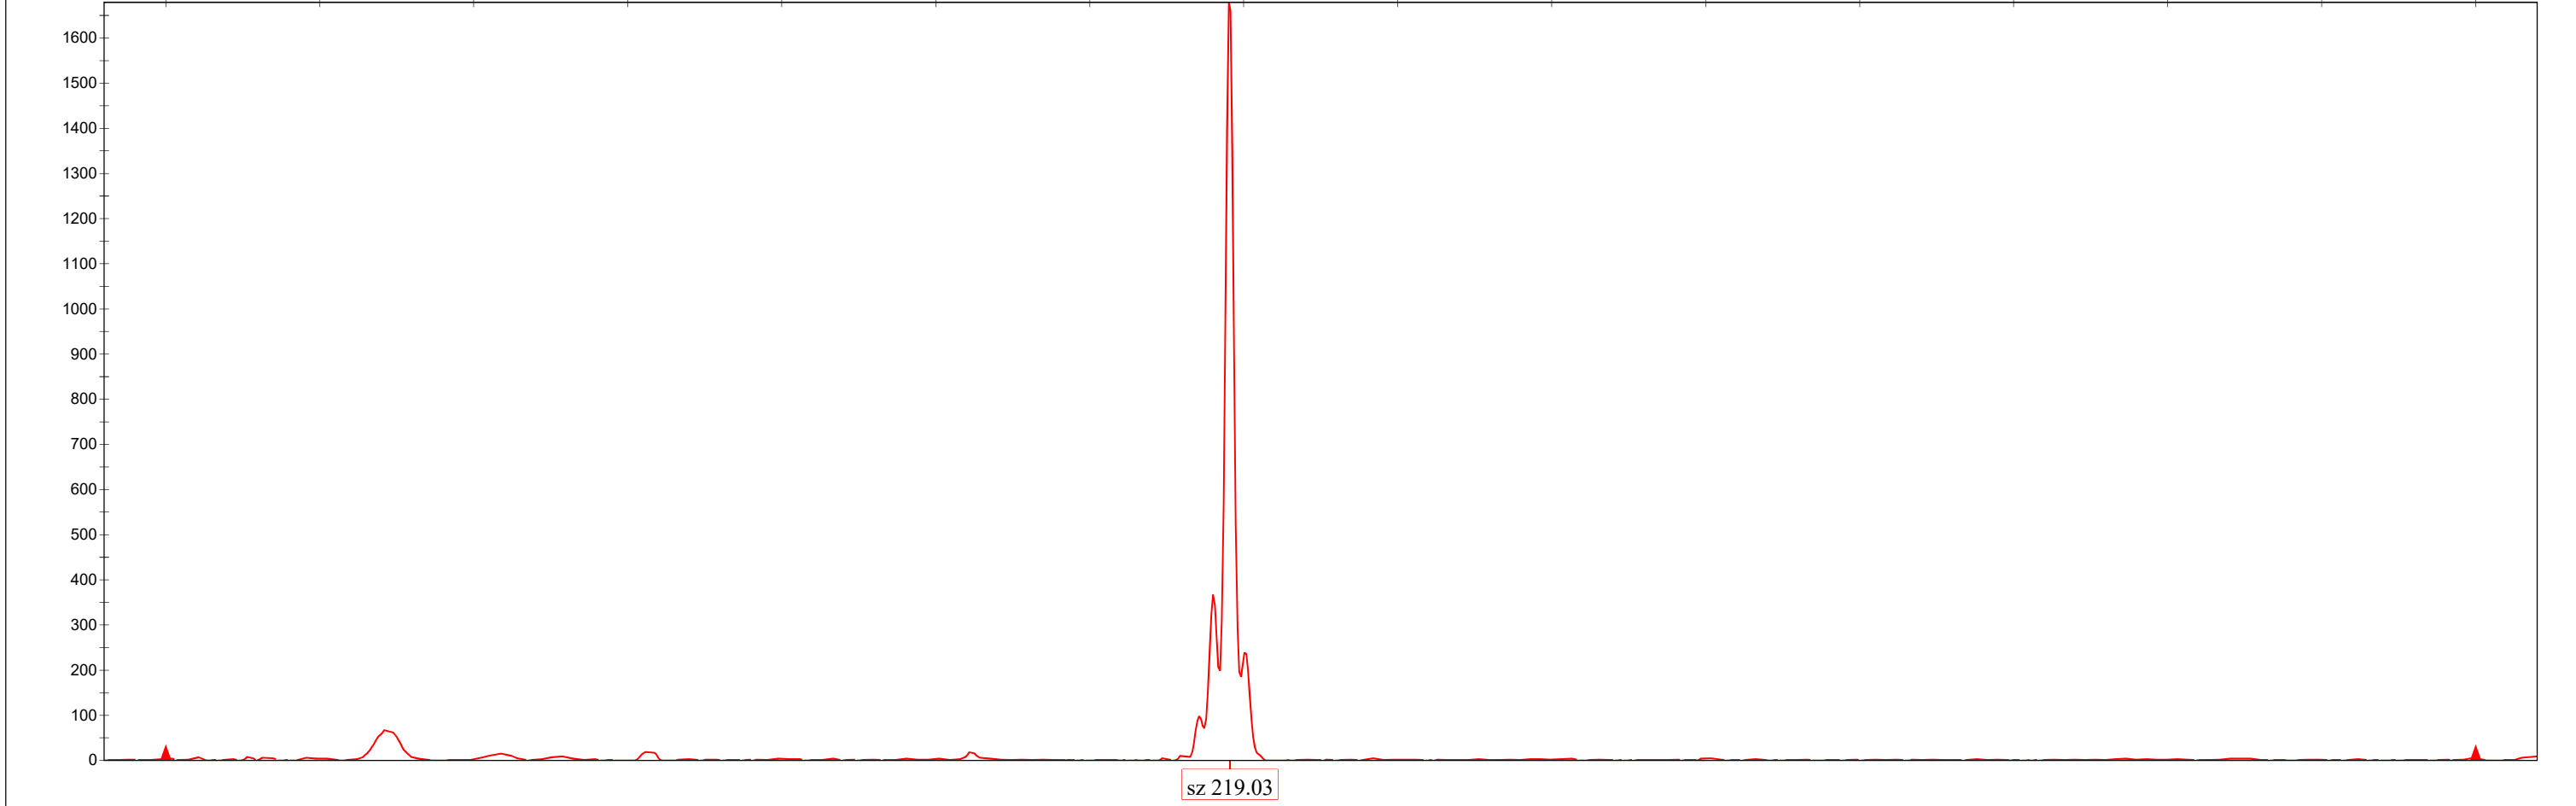

|                     |    |     |     |  |  |  |  |  |  |  |  |  |  |  |  |  |  |  |  |  |
|---------------------|----|-----|-----|--|--|--|--|--|--|--|--|--|--|--|--|--|--|--|--|--|
| 39_G01_013_Seq1.fsa | 39 | BC1 | BC1 |  |  |  |  |  |  |  |  |  |  |  |  |  |  |  |  |  |
|---------------------|----|-----|-----|--|--|--|--|--|--|--|--|--|--|--|--|--|--|--|--|--|

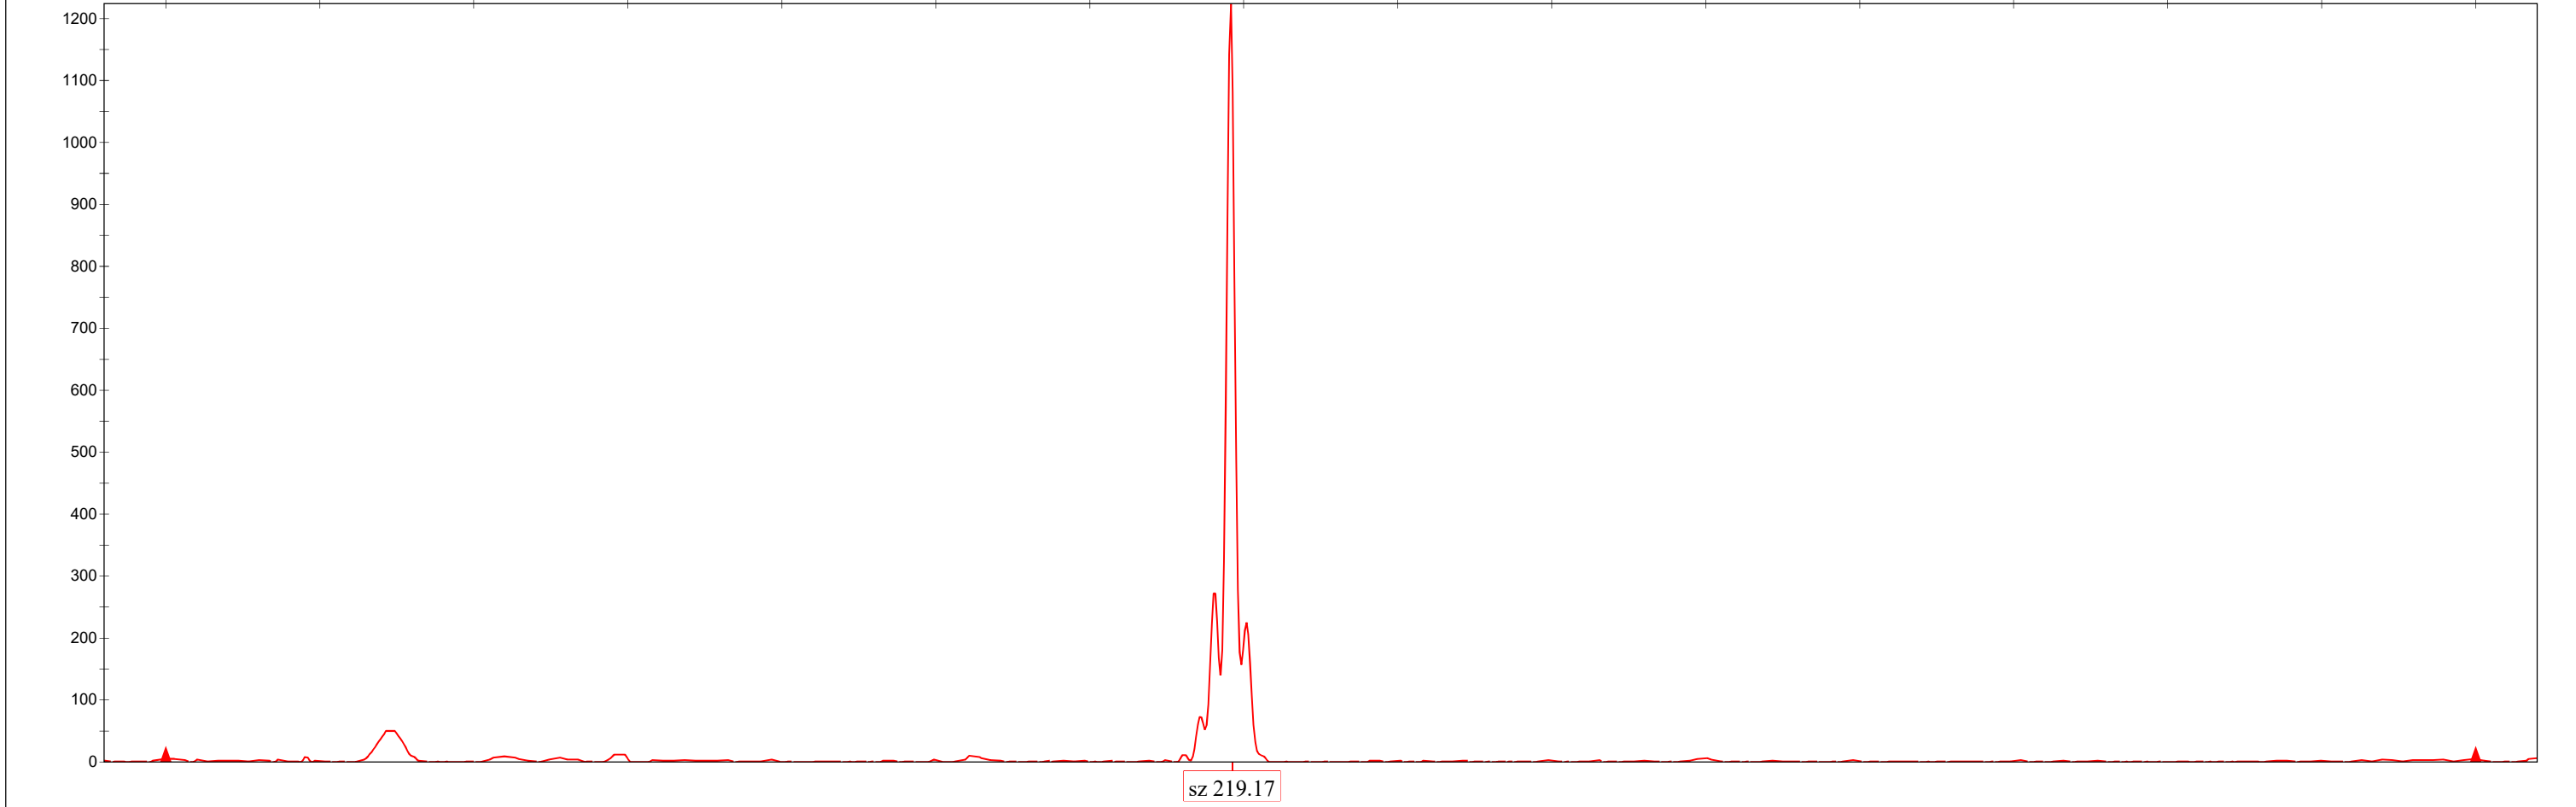

|                     |    |     |     |      |      |      |      |      |  |  |  |  |      |      |  |  |  |  |  |  |
|---------------------|----|-----|-----|------|------|------|------|------|--|--|--|--|------|------|--|--|--|--|--|--|
| 40_H01_015_Seq1.fsa | 40 | BC1 | BC1 | -4.0 | -4.0 | -4.0 | -4.0 | -4.0 |  |  |  |  | -4.0 | -4.0 |  |  |  |  |  |  |
|---------------------|----|-----|-----|------|------|------|------|------|--|--|--|--|------|------|--|--|--|--|--|--|

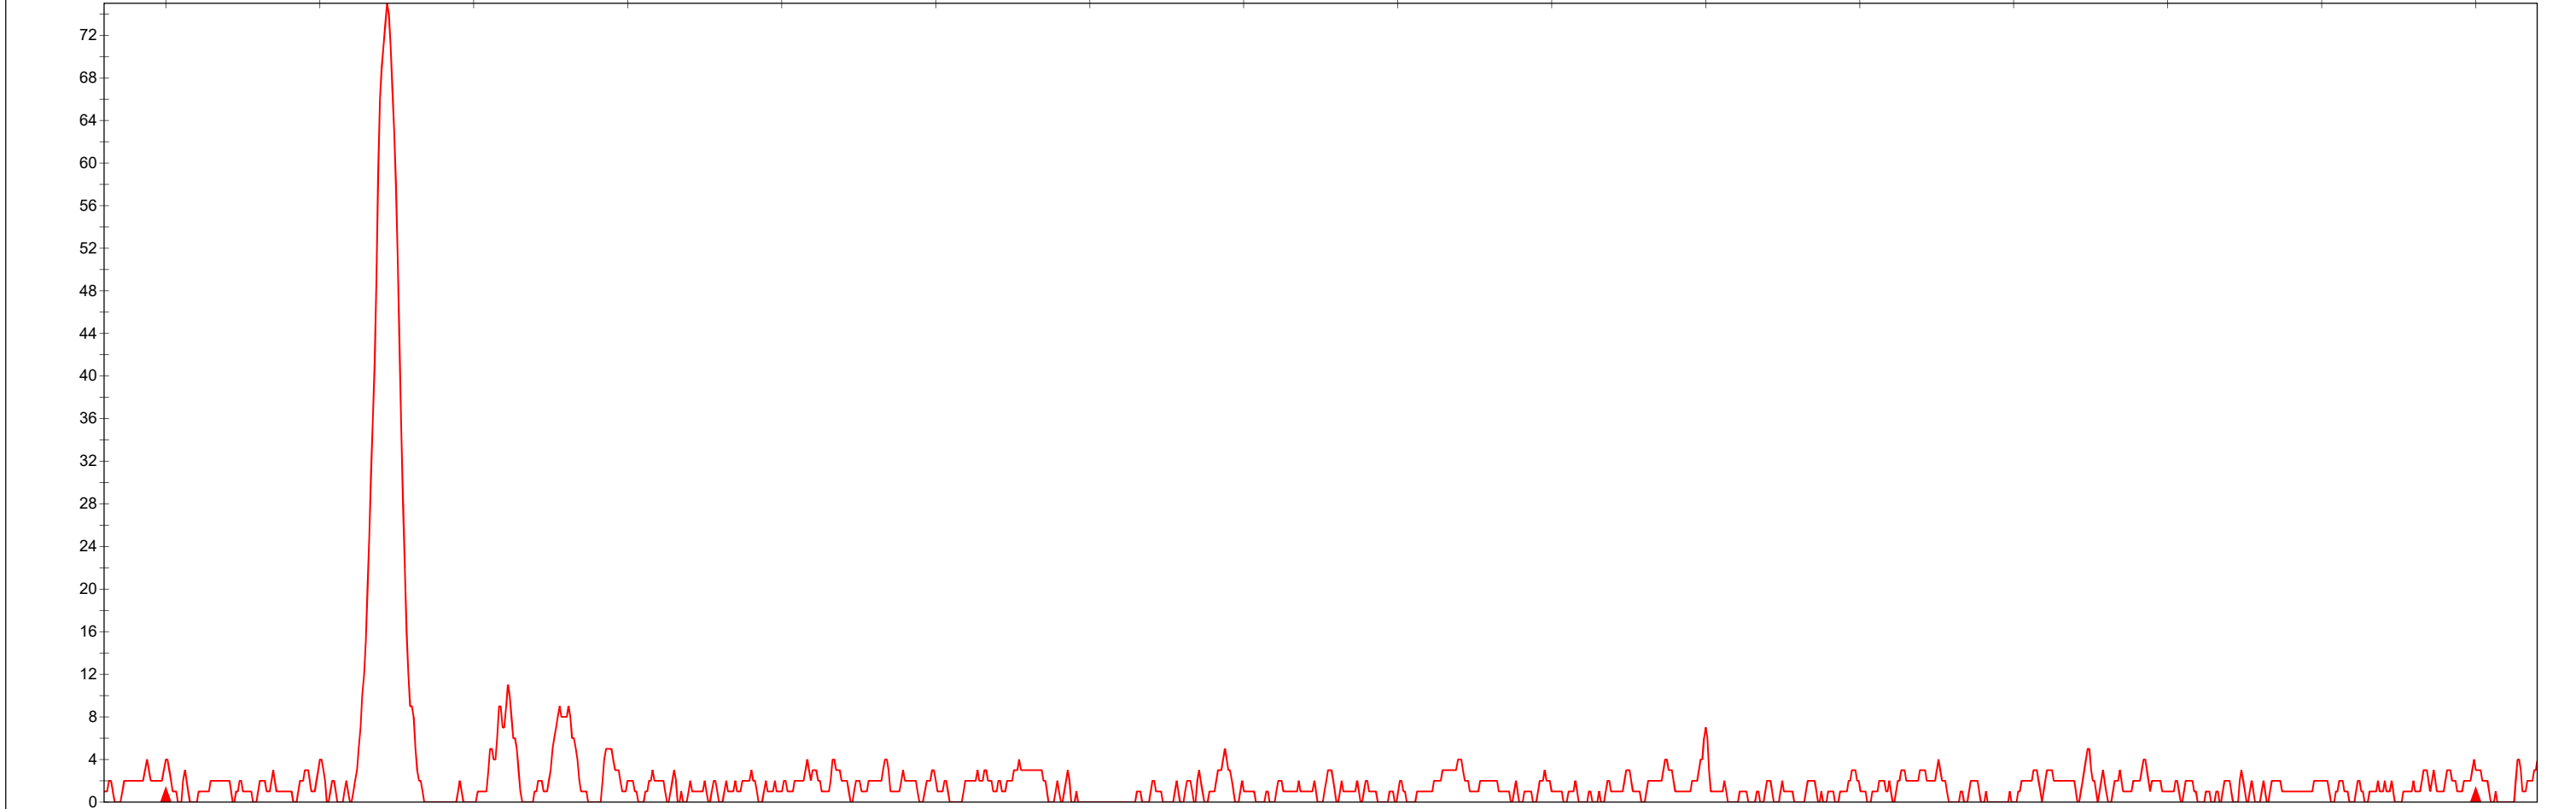

| Sample File | Sample Name | Panel | Marker | OS | SHP | OBA | SPA | SP | BIN | PHR | LPH | SPU | AN | BD | DP | NB | CC | OVL | GQ |
|-------------|-------------|-------|--------|----|-----|-----|-----|----|-----|-----|-----|-----|----|----|----|----|----|-----|----|
|-------------|-------------|-------|--------|----|-----|-----|-----|----|-----|-----|-----|-----|----|----|----|----|----|-----|----|

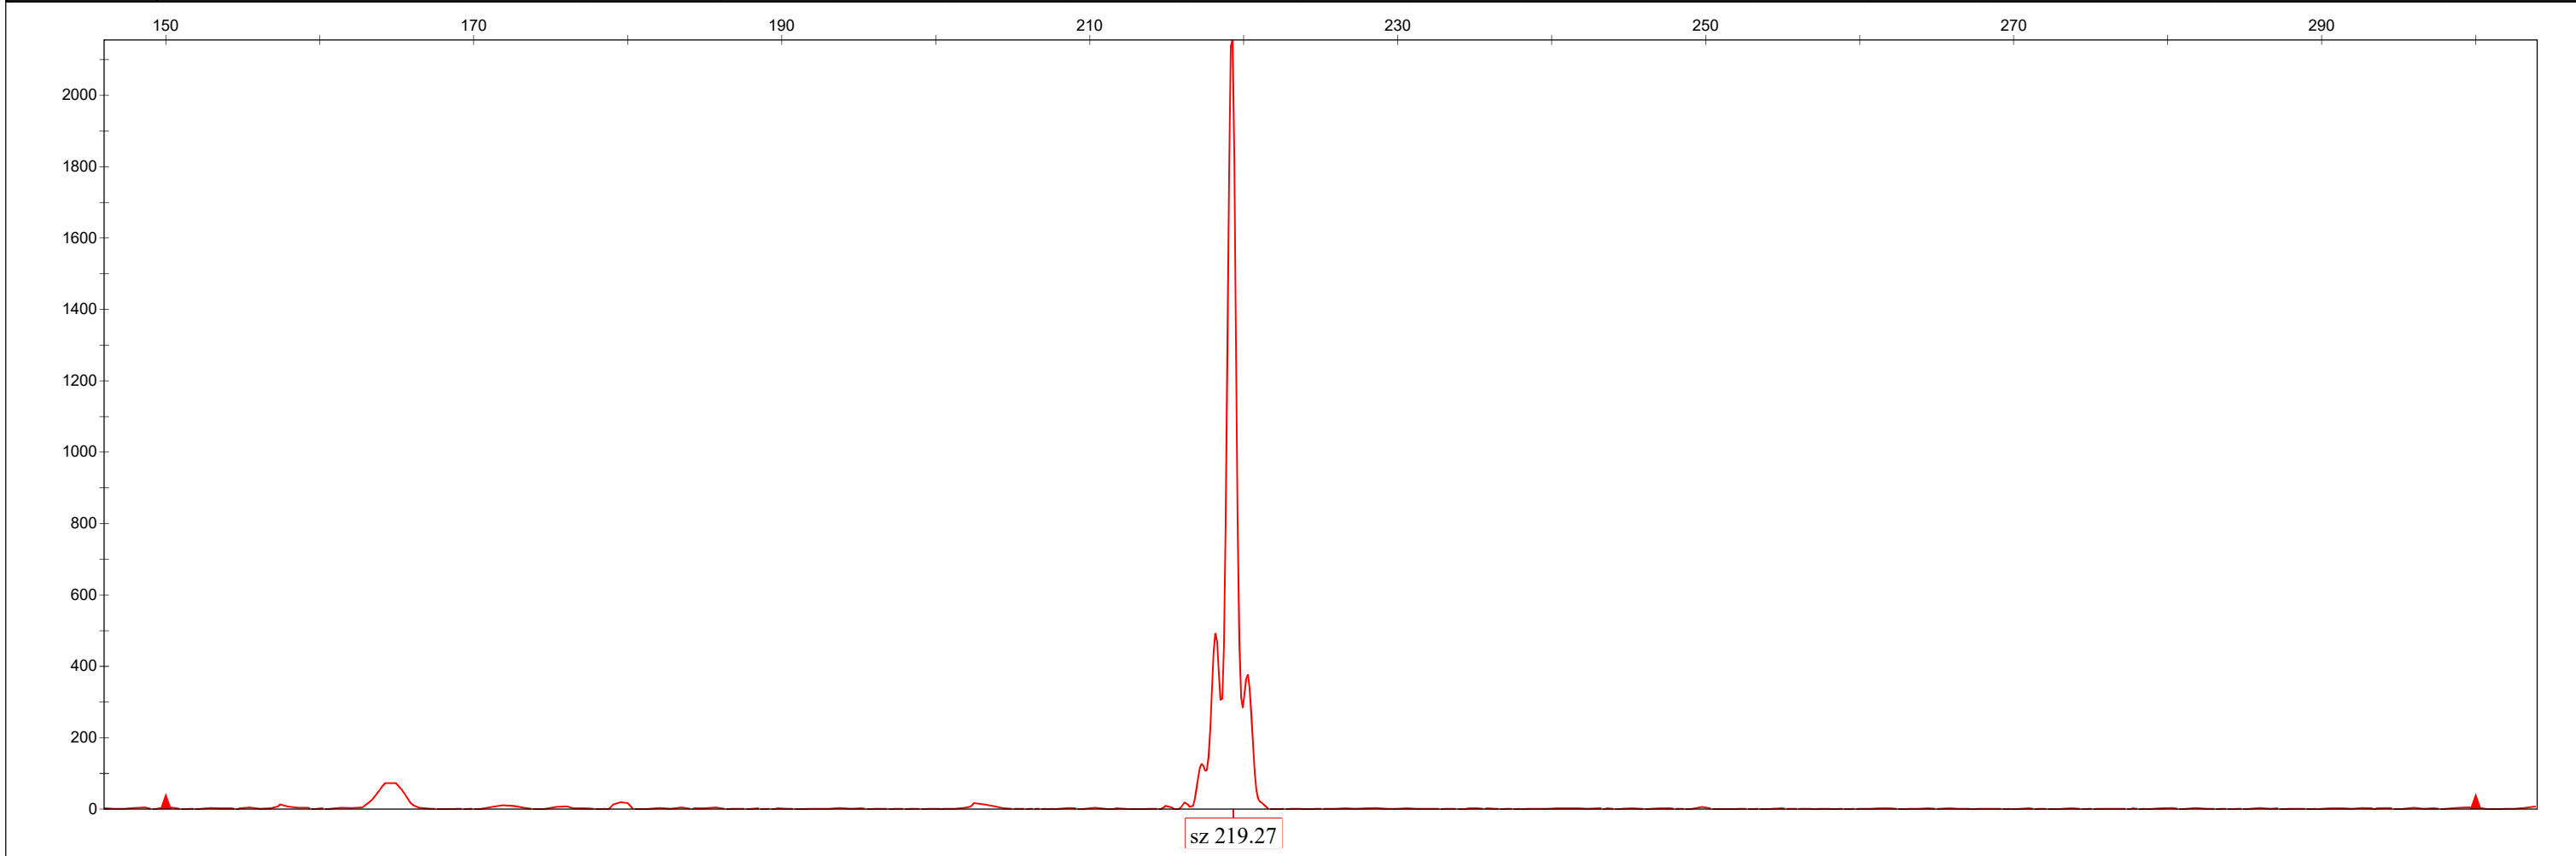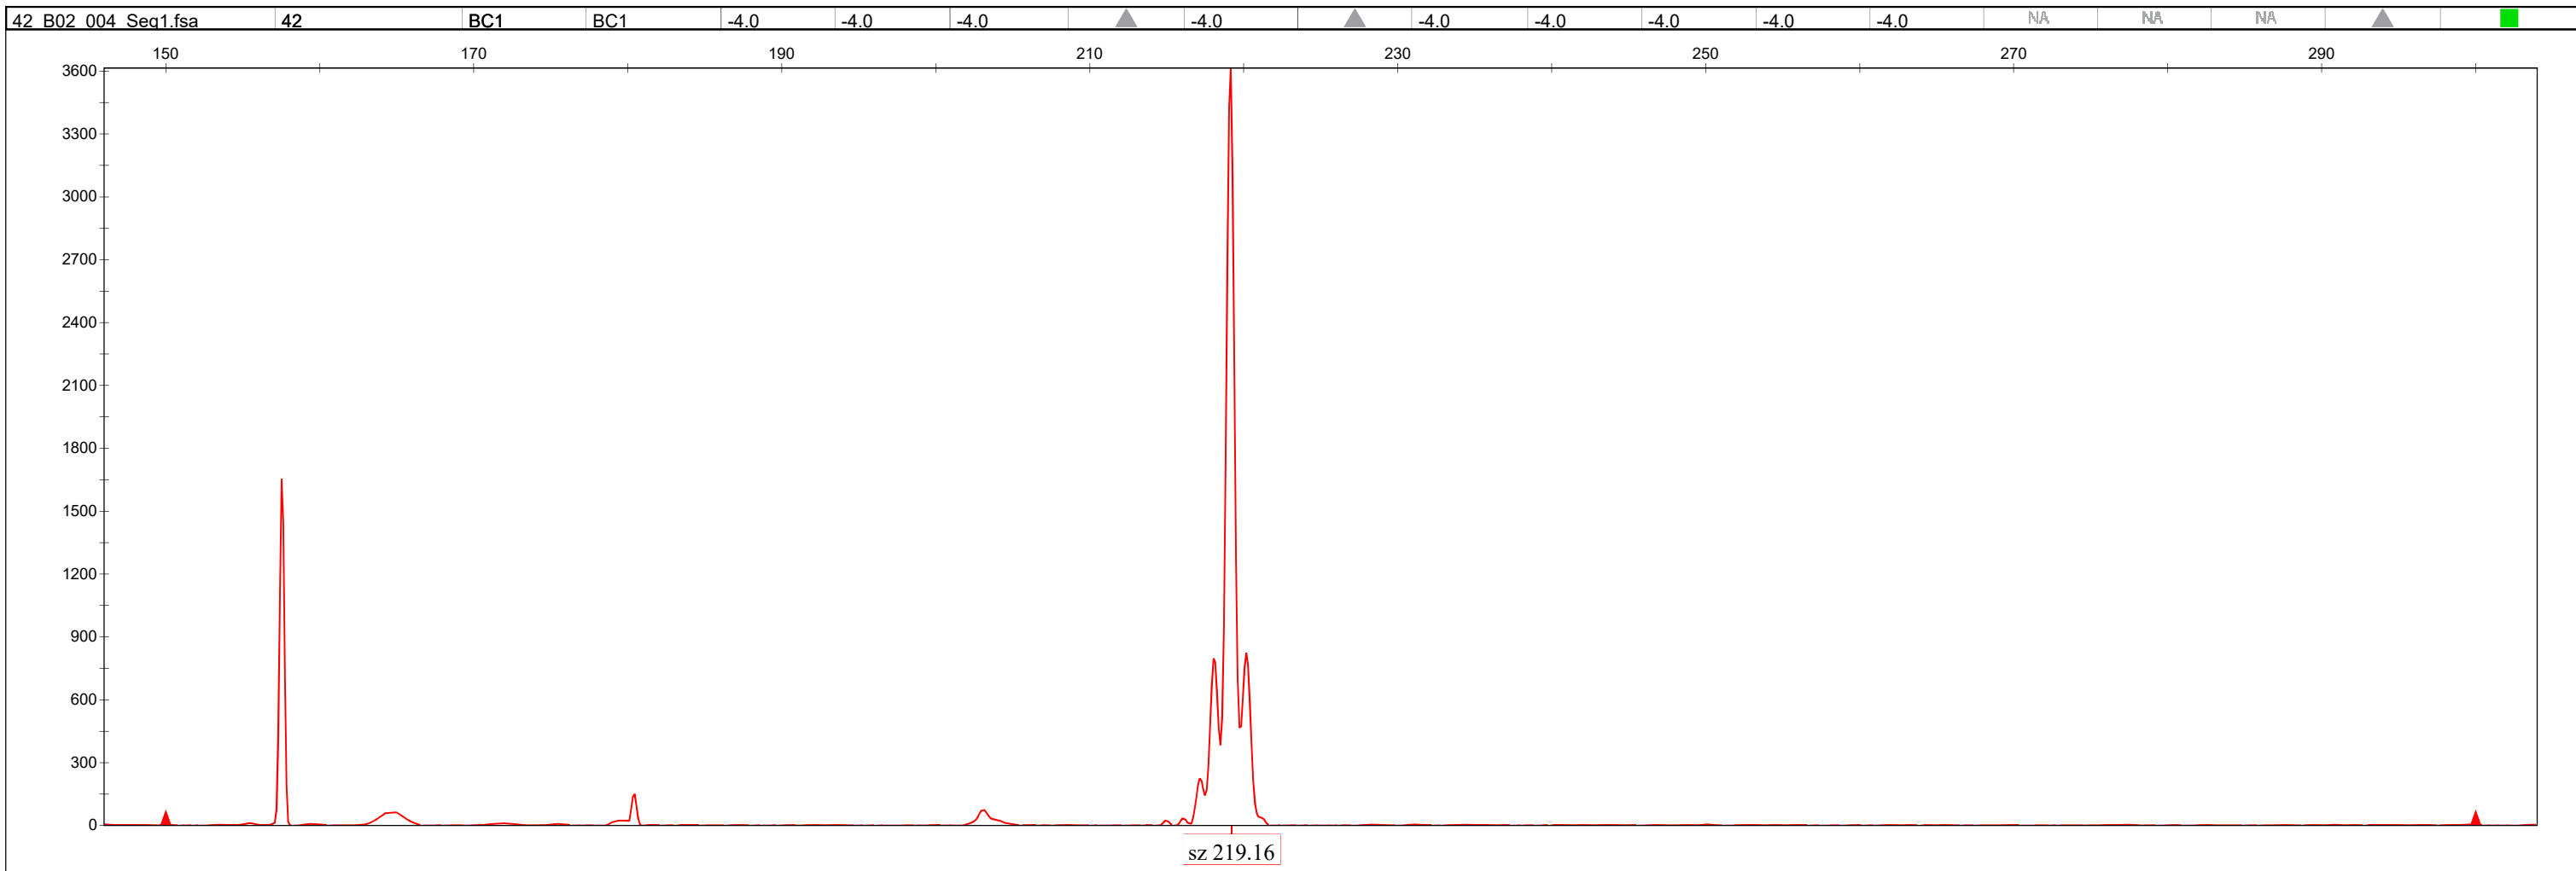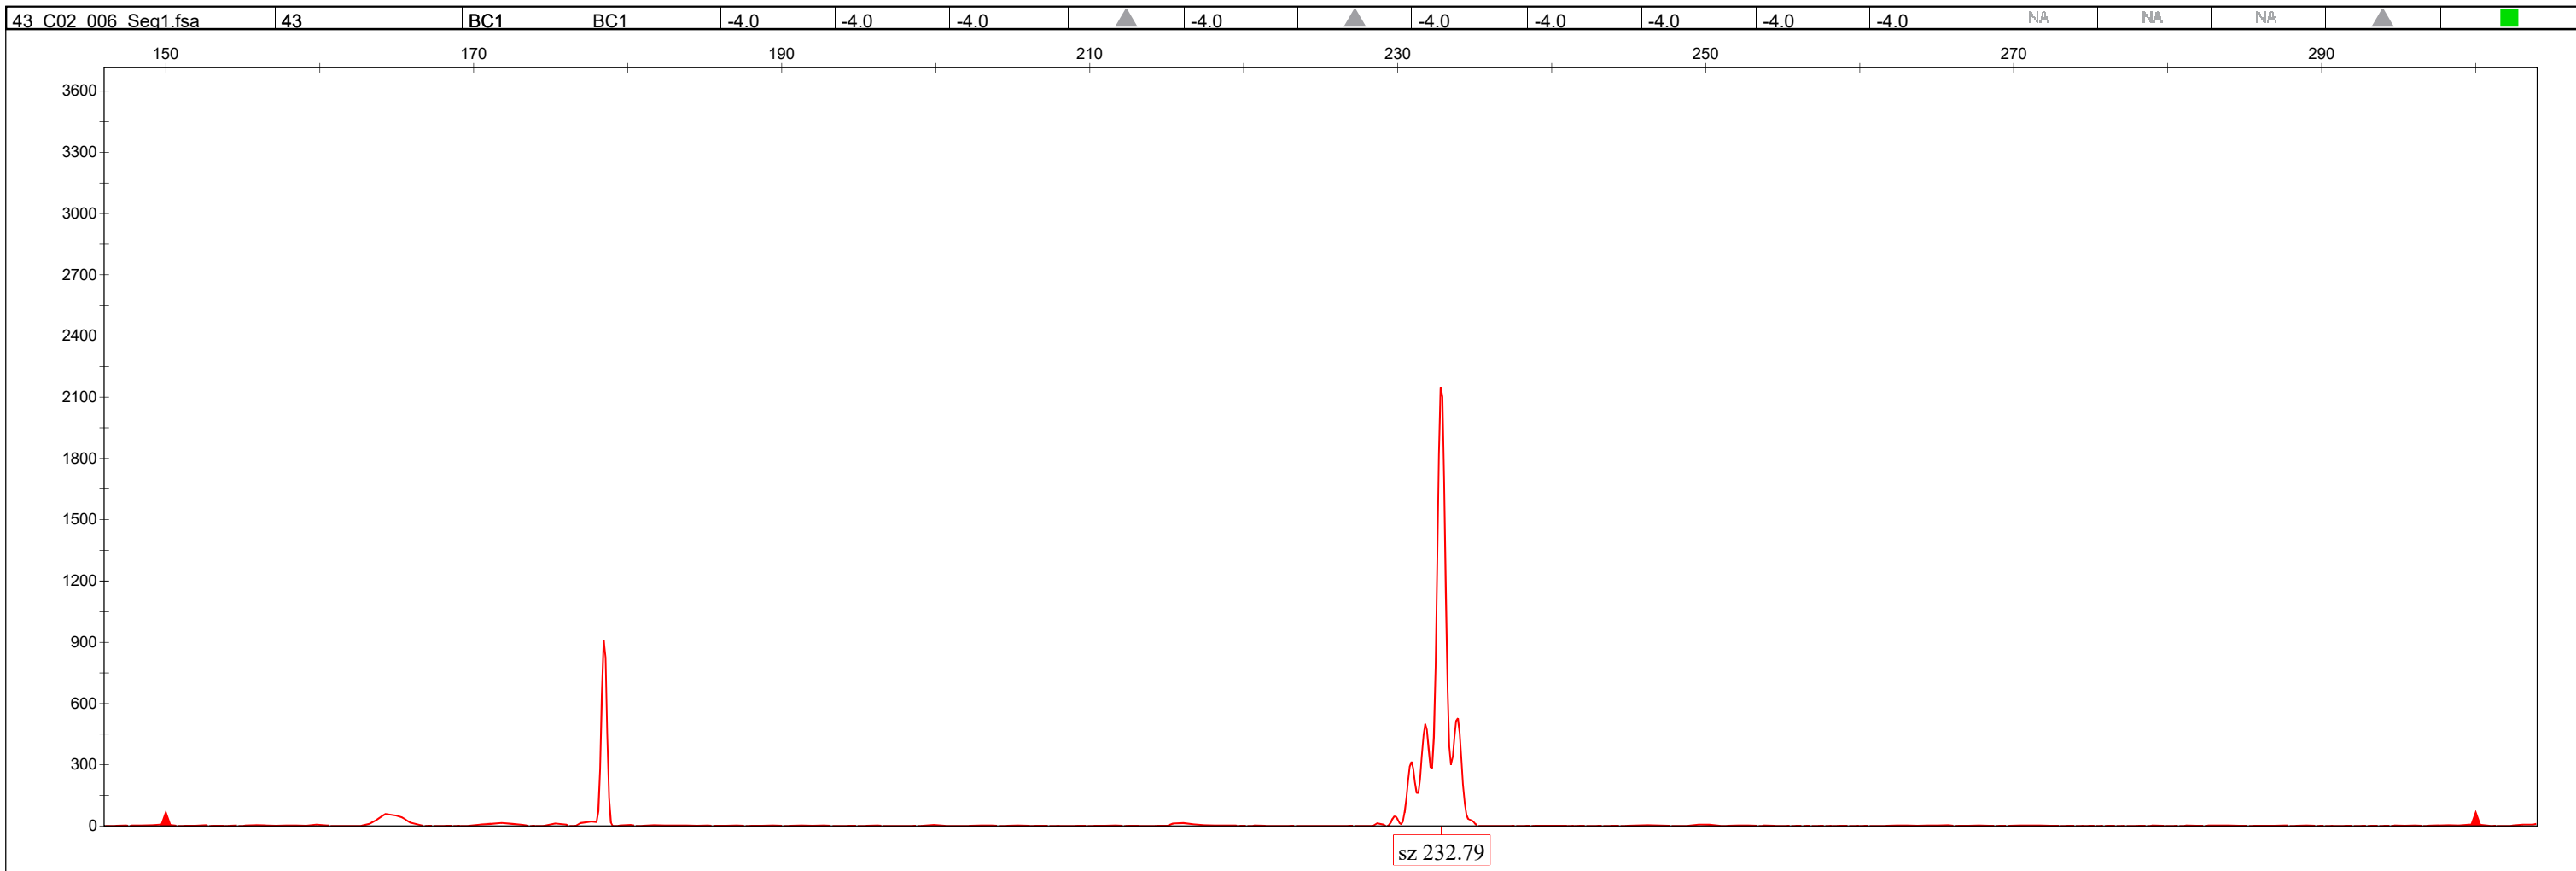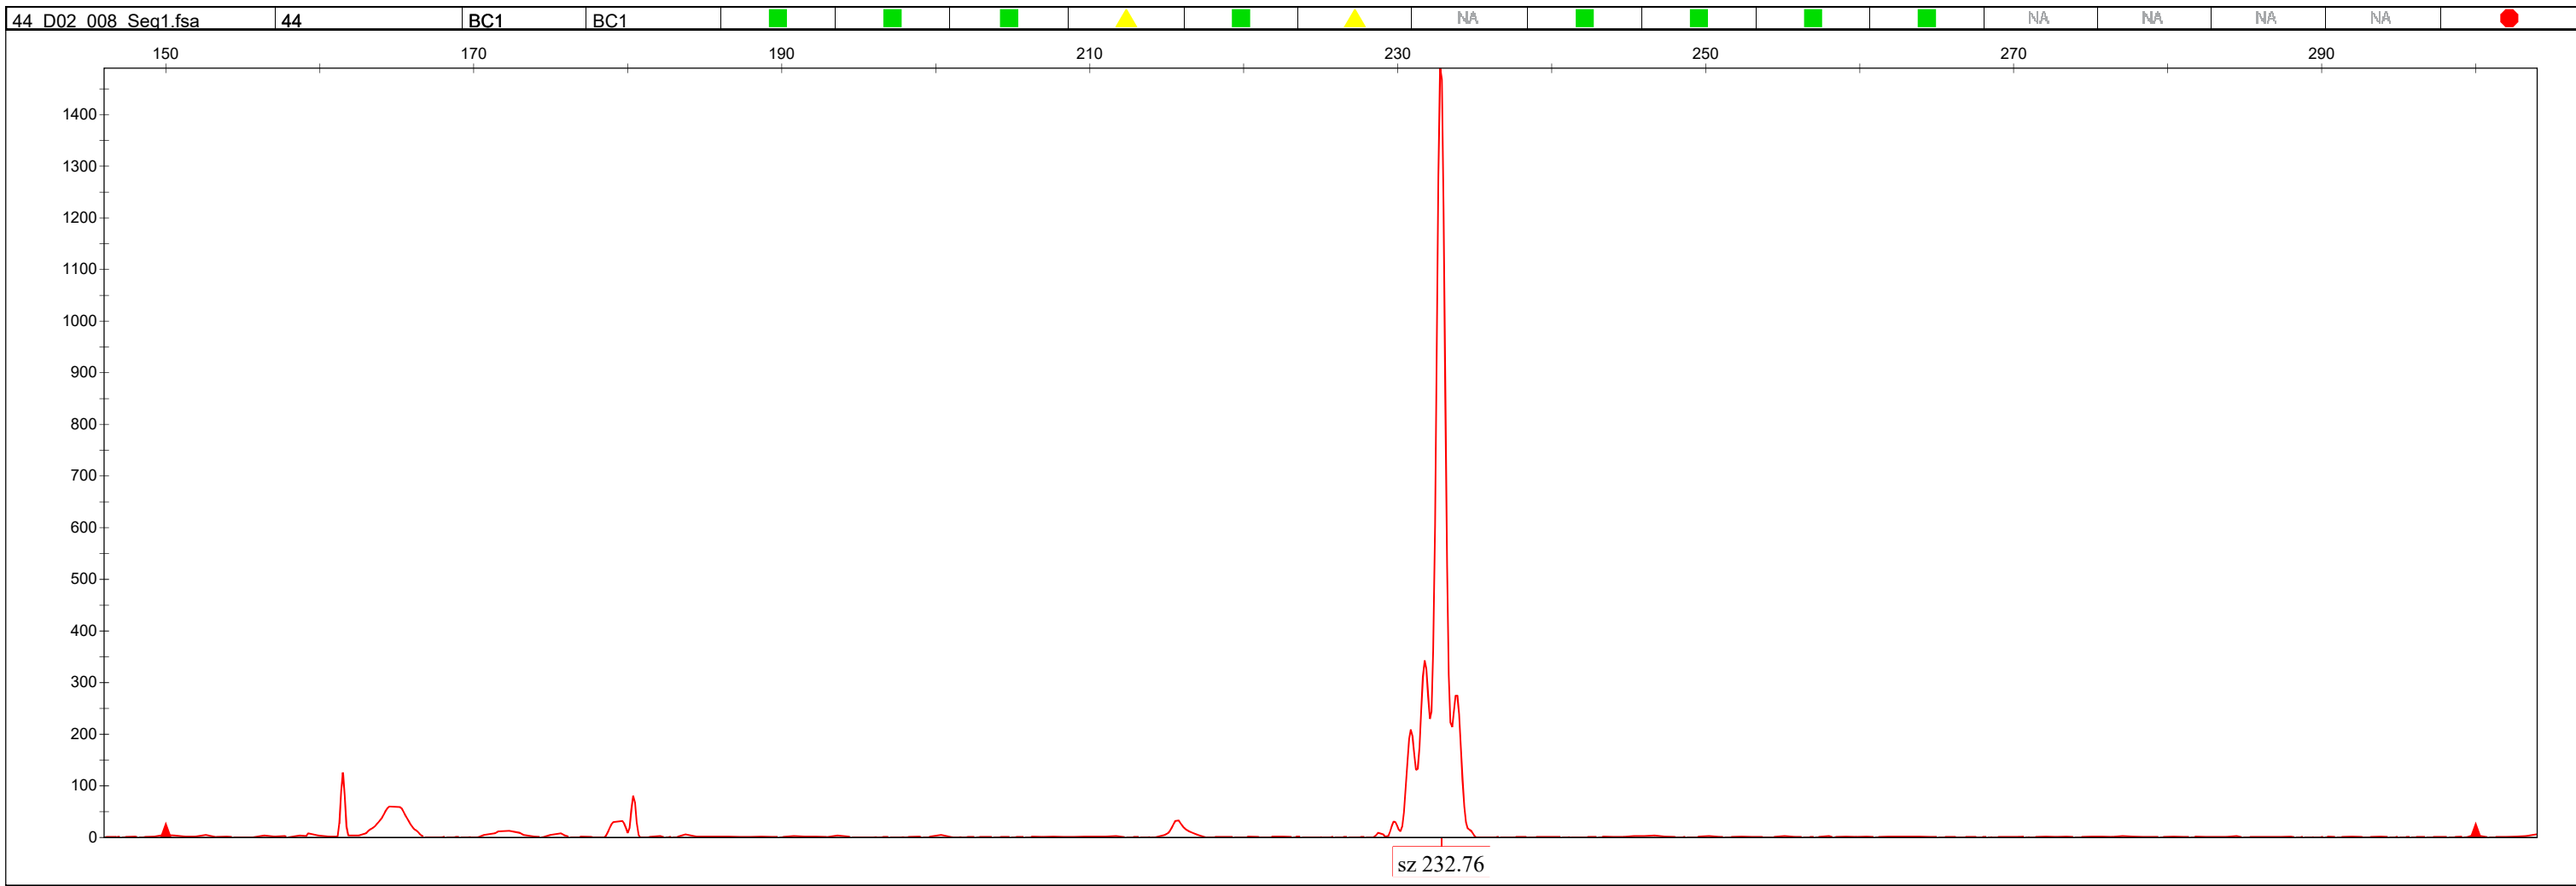

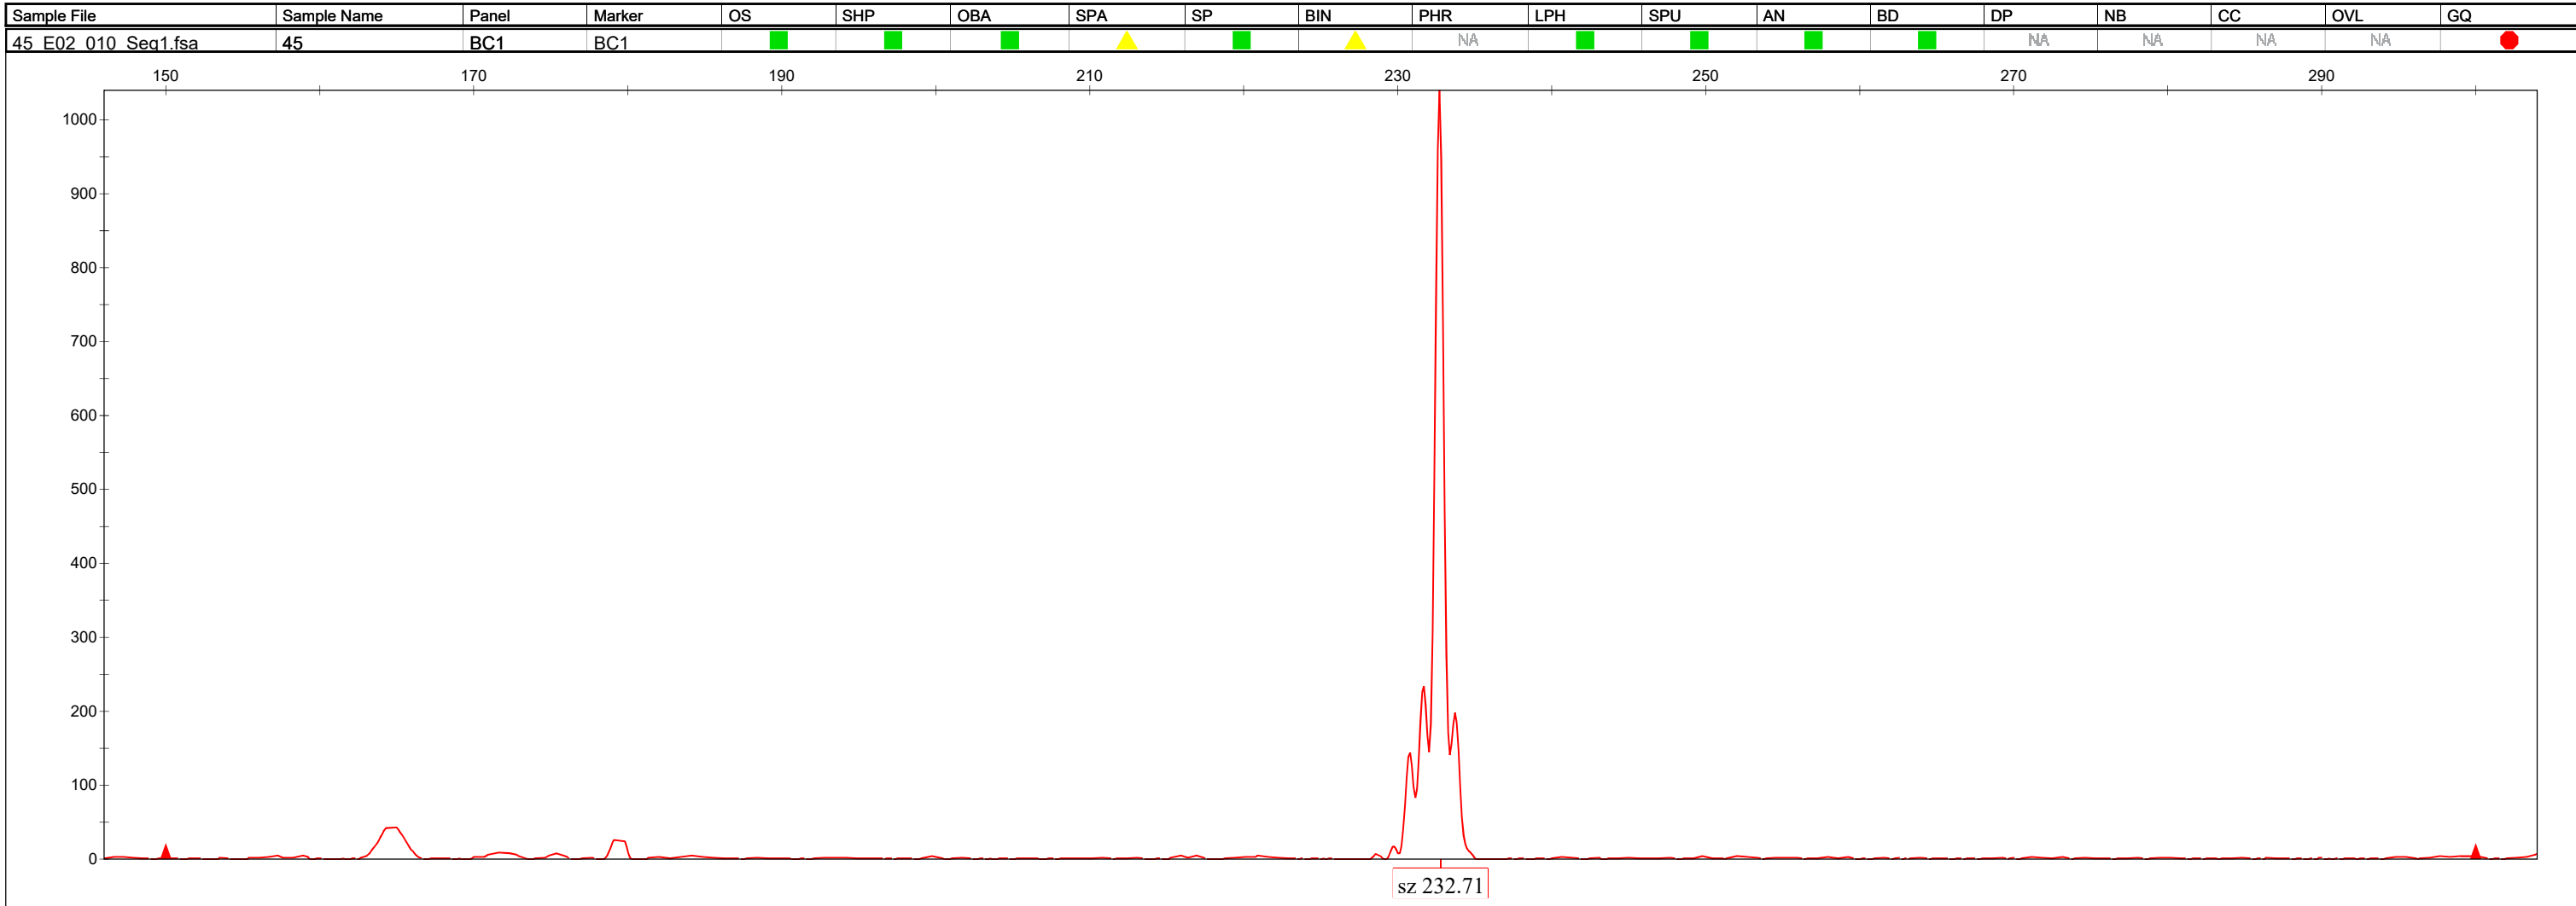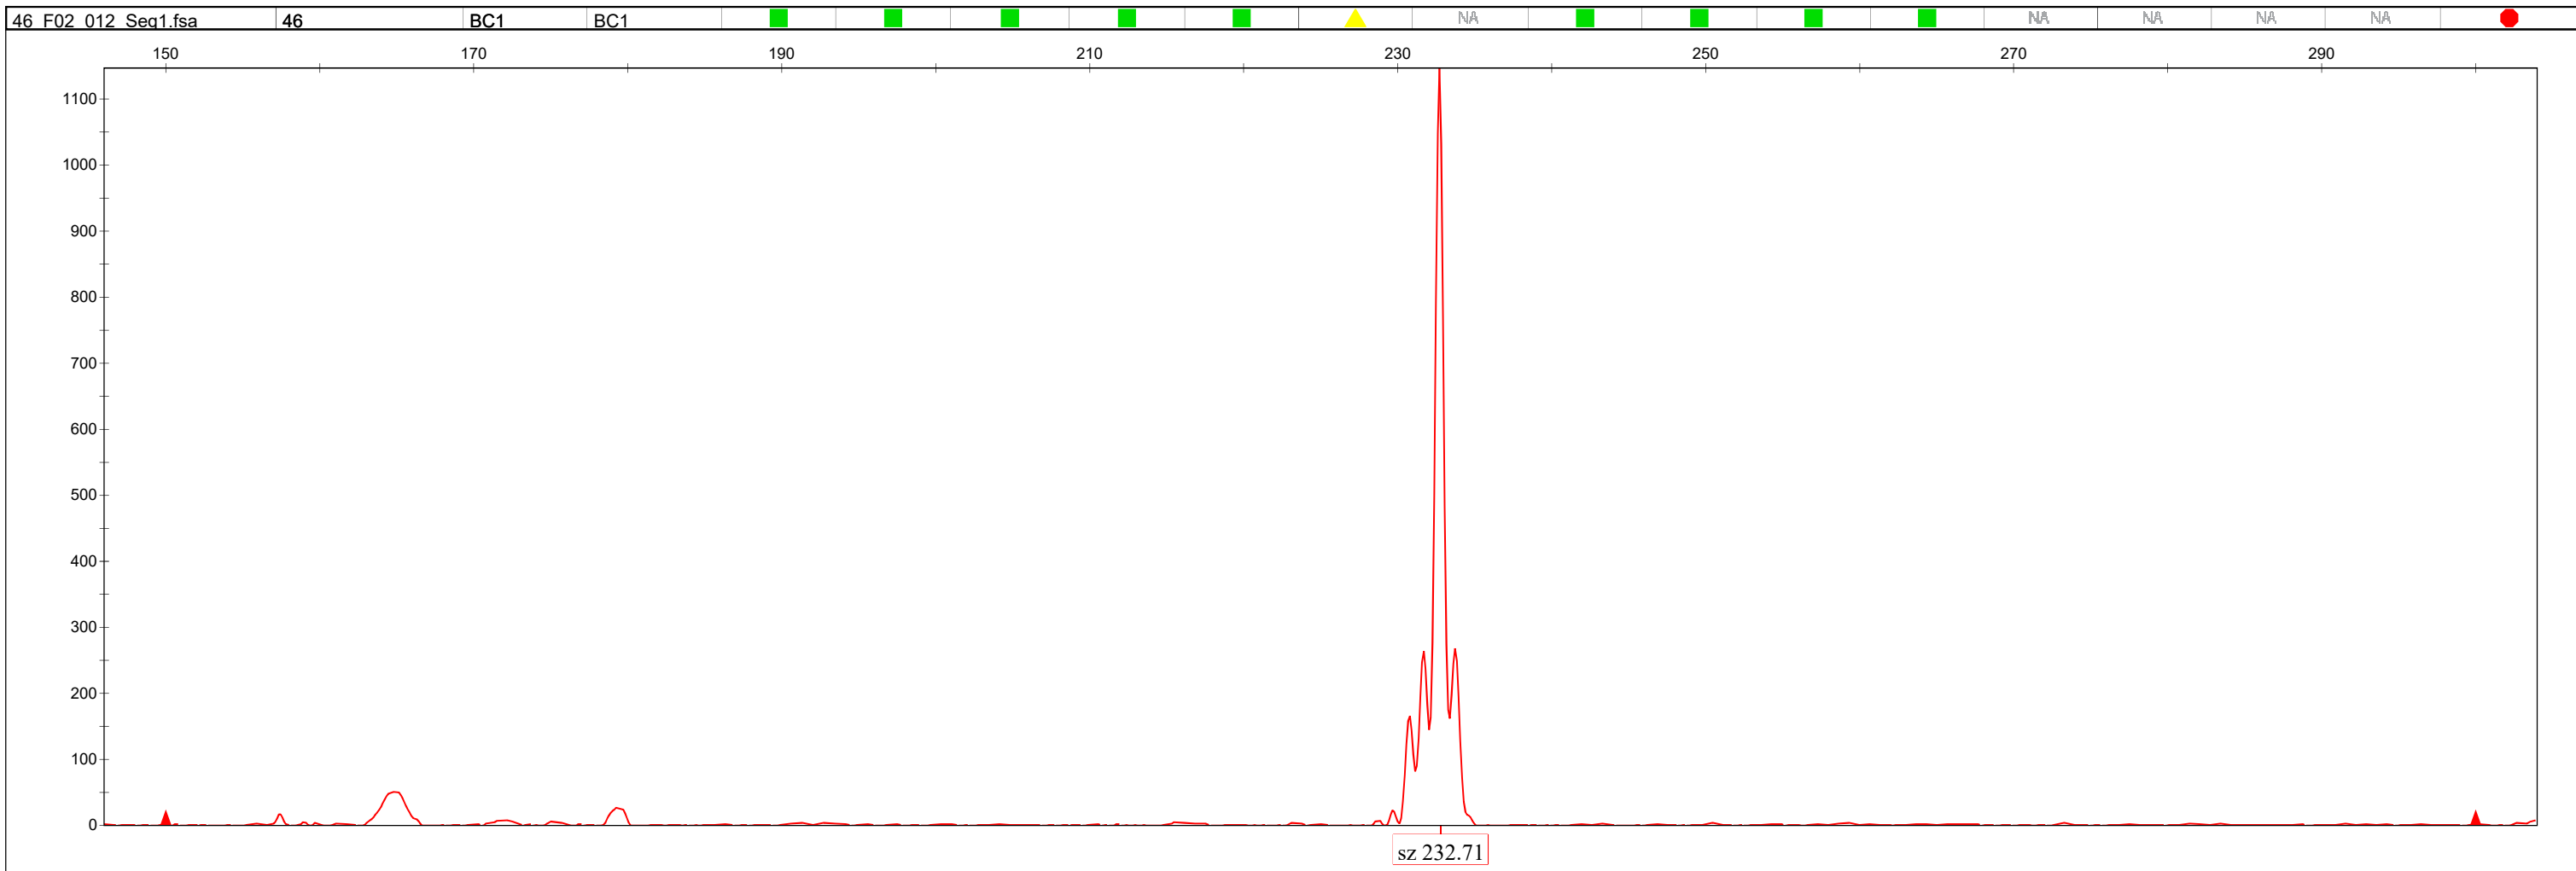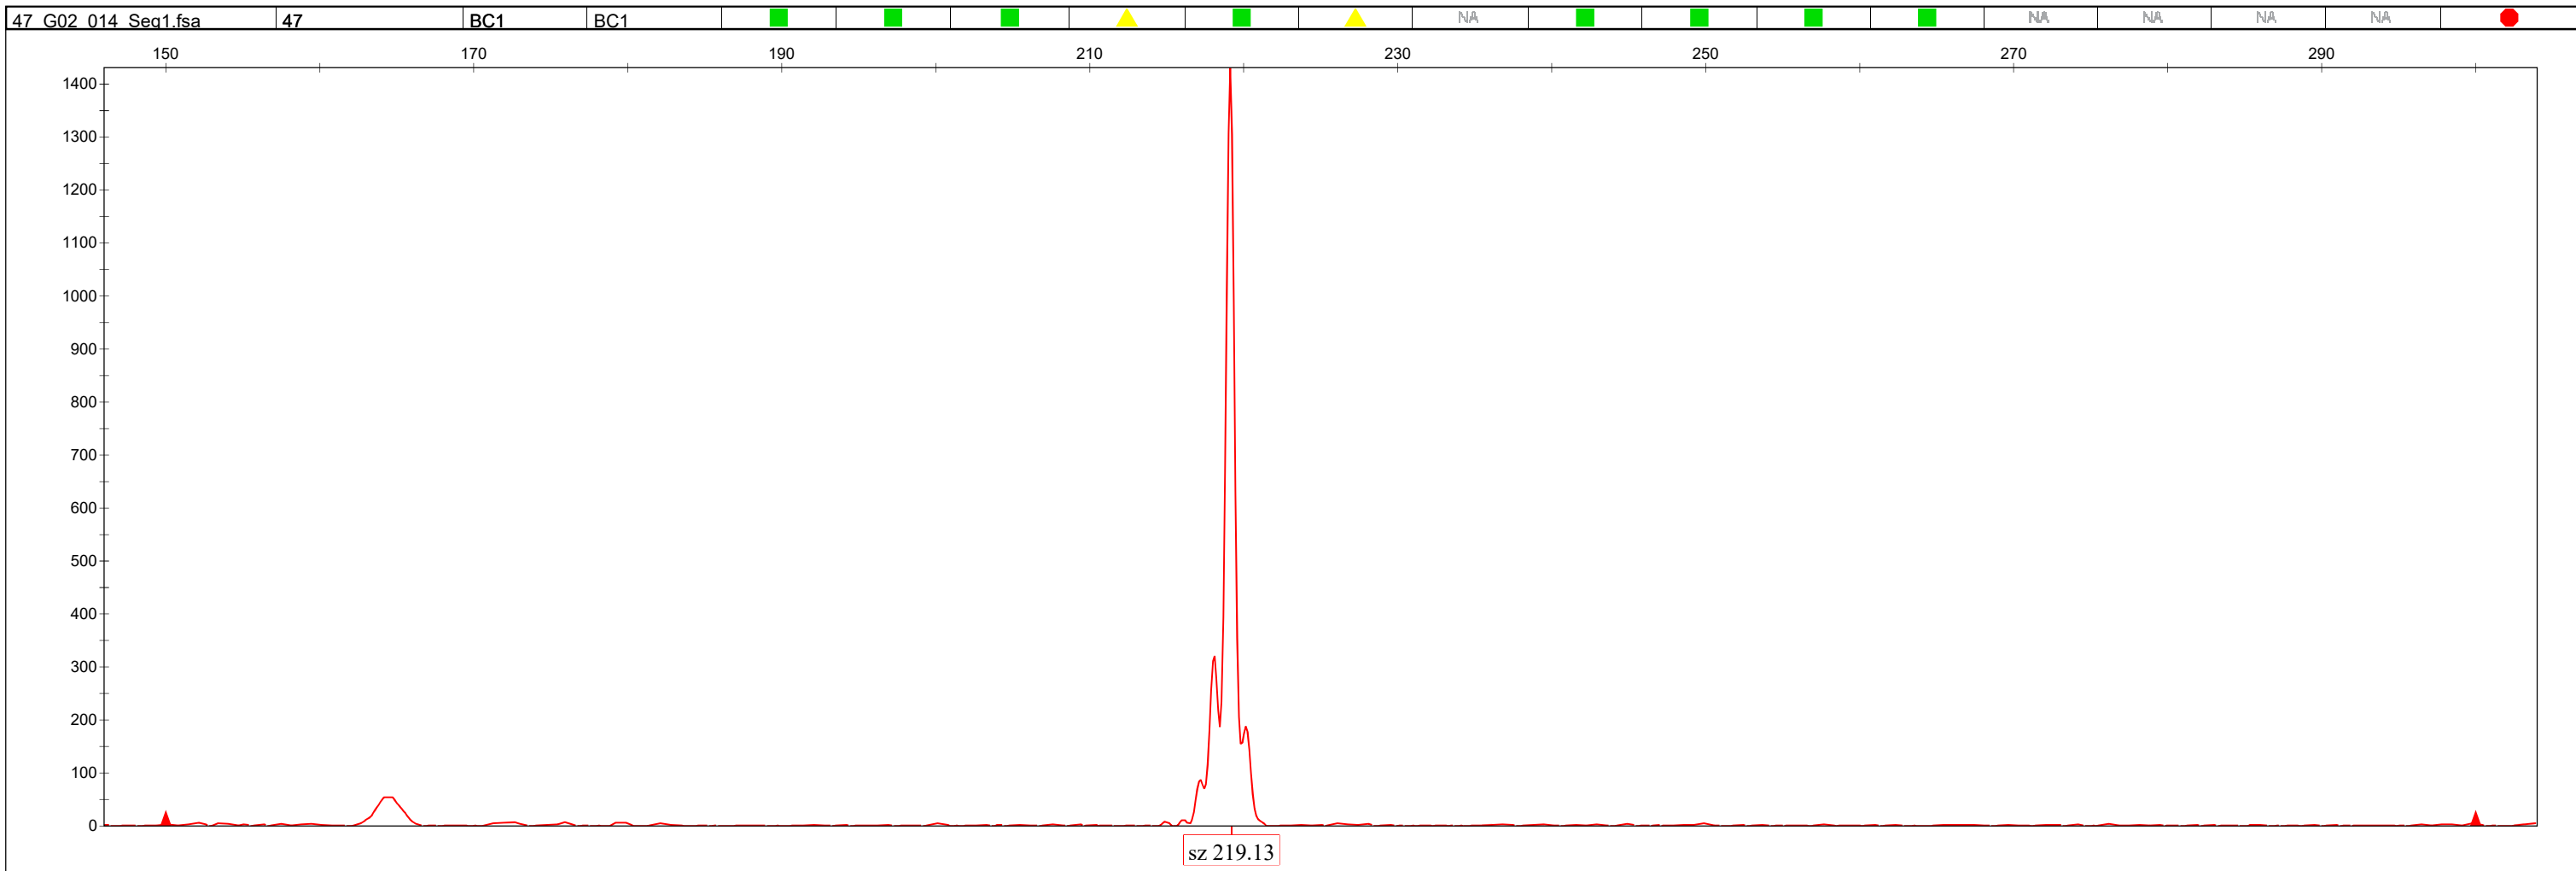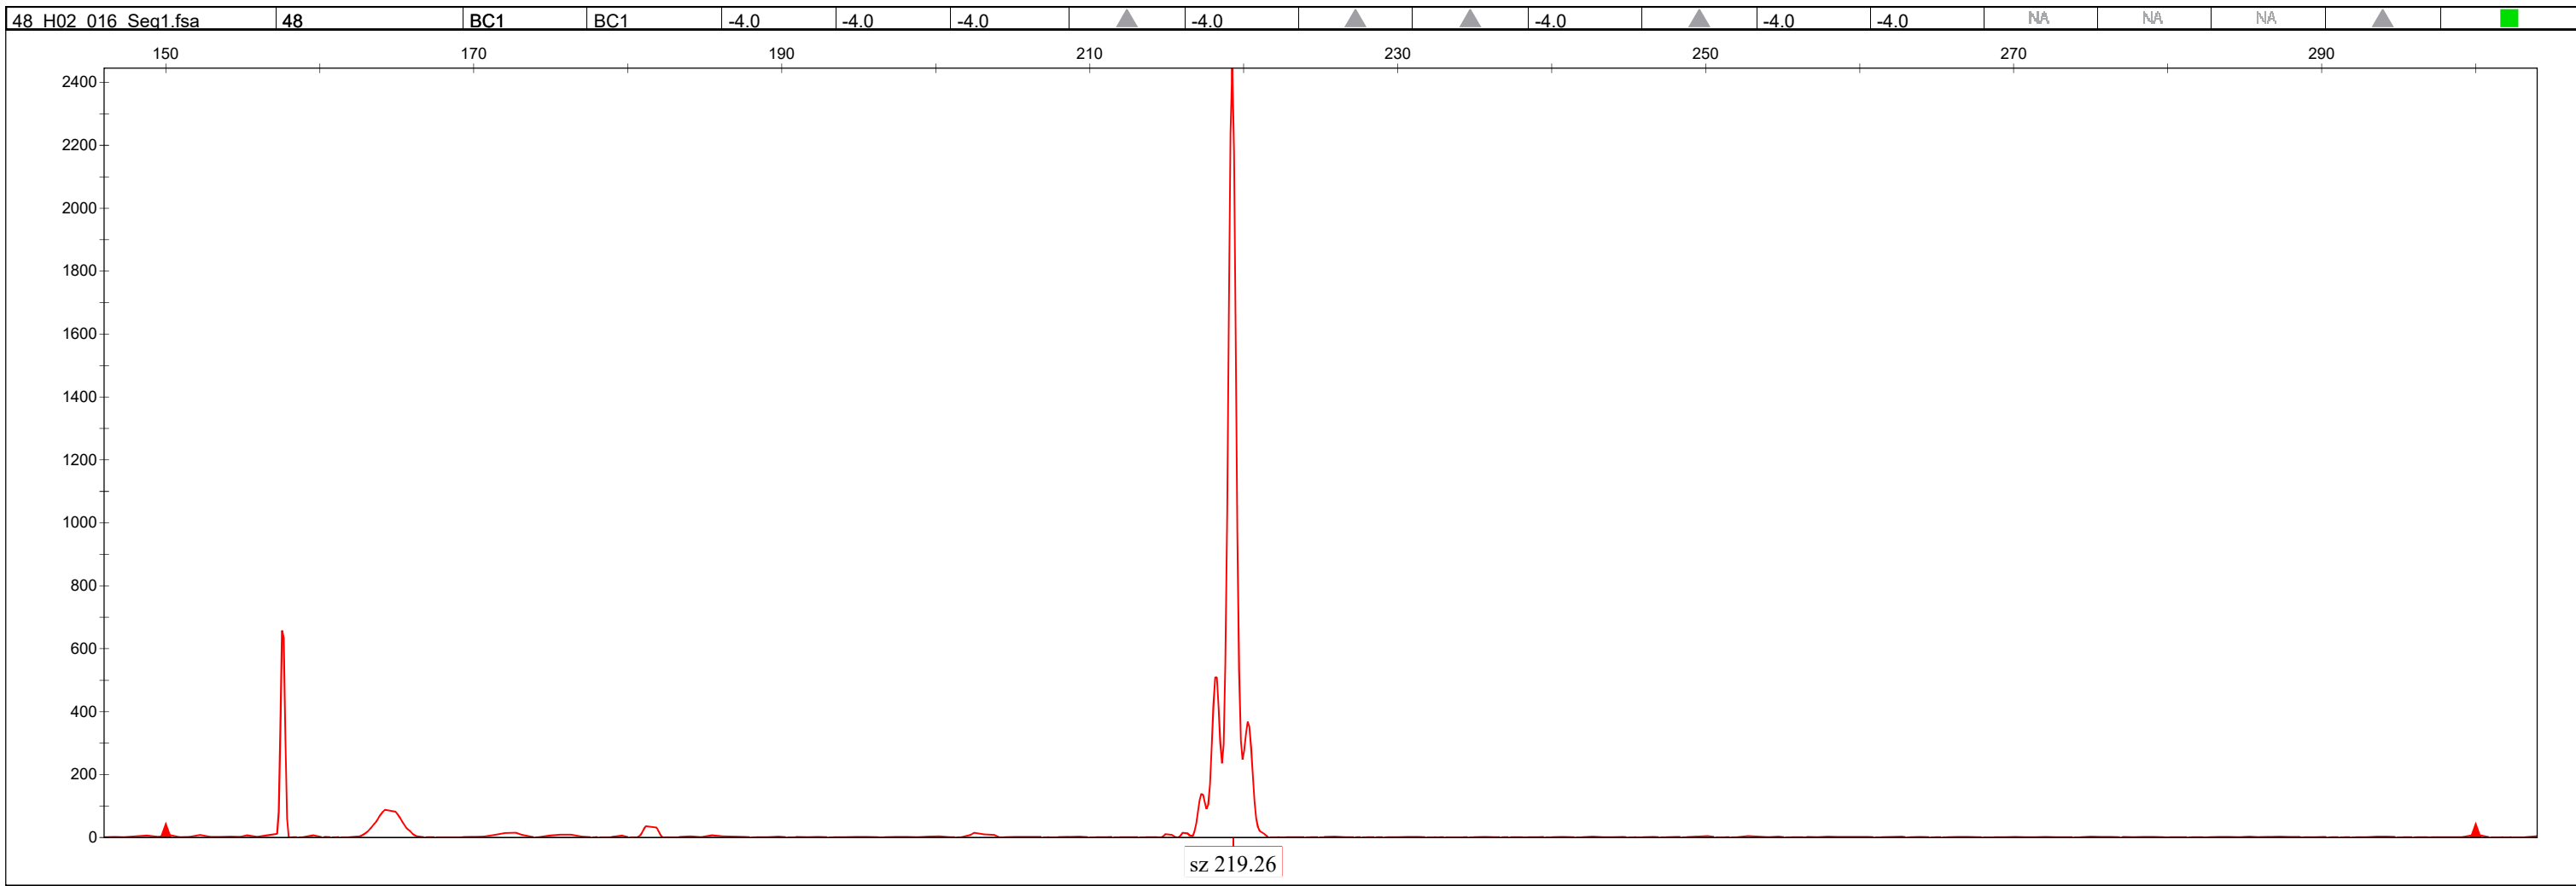

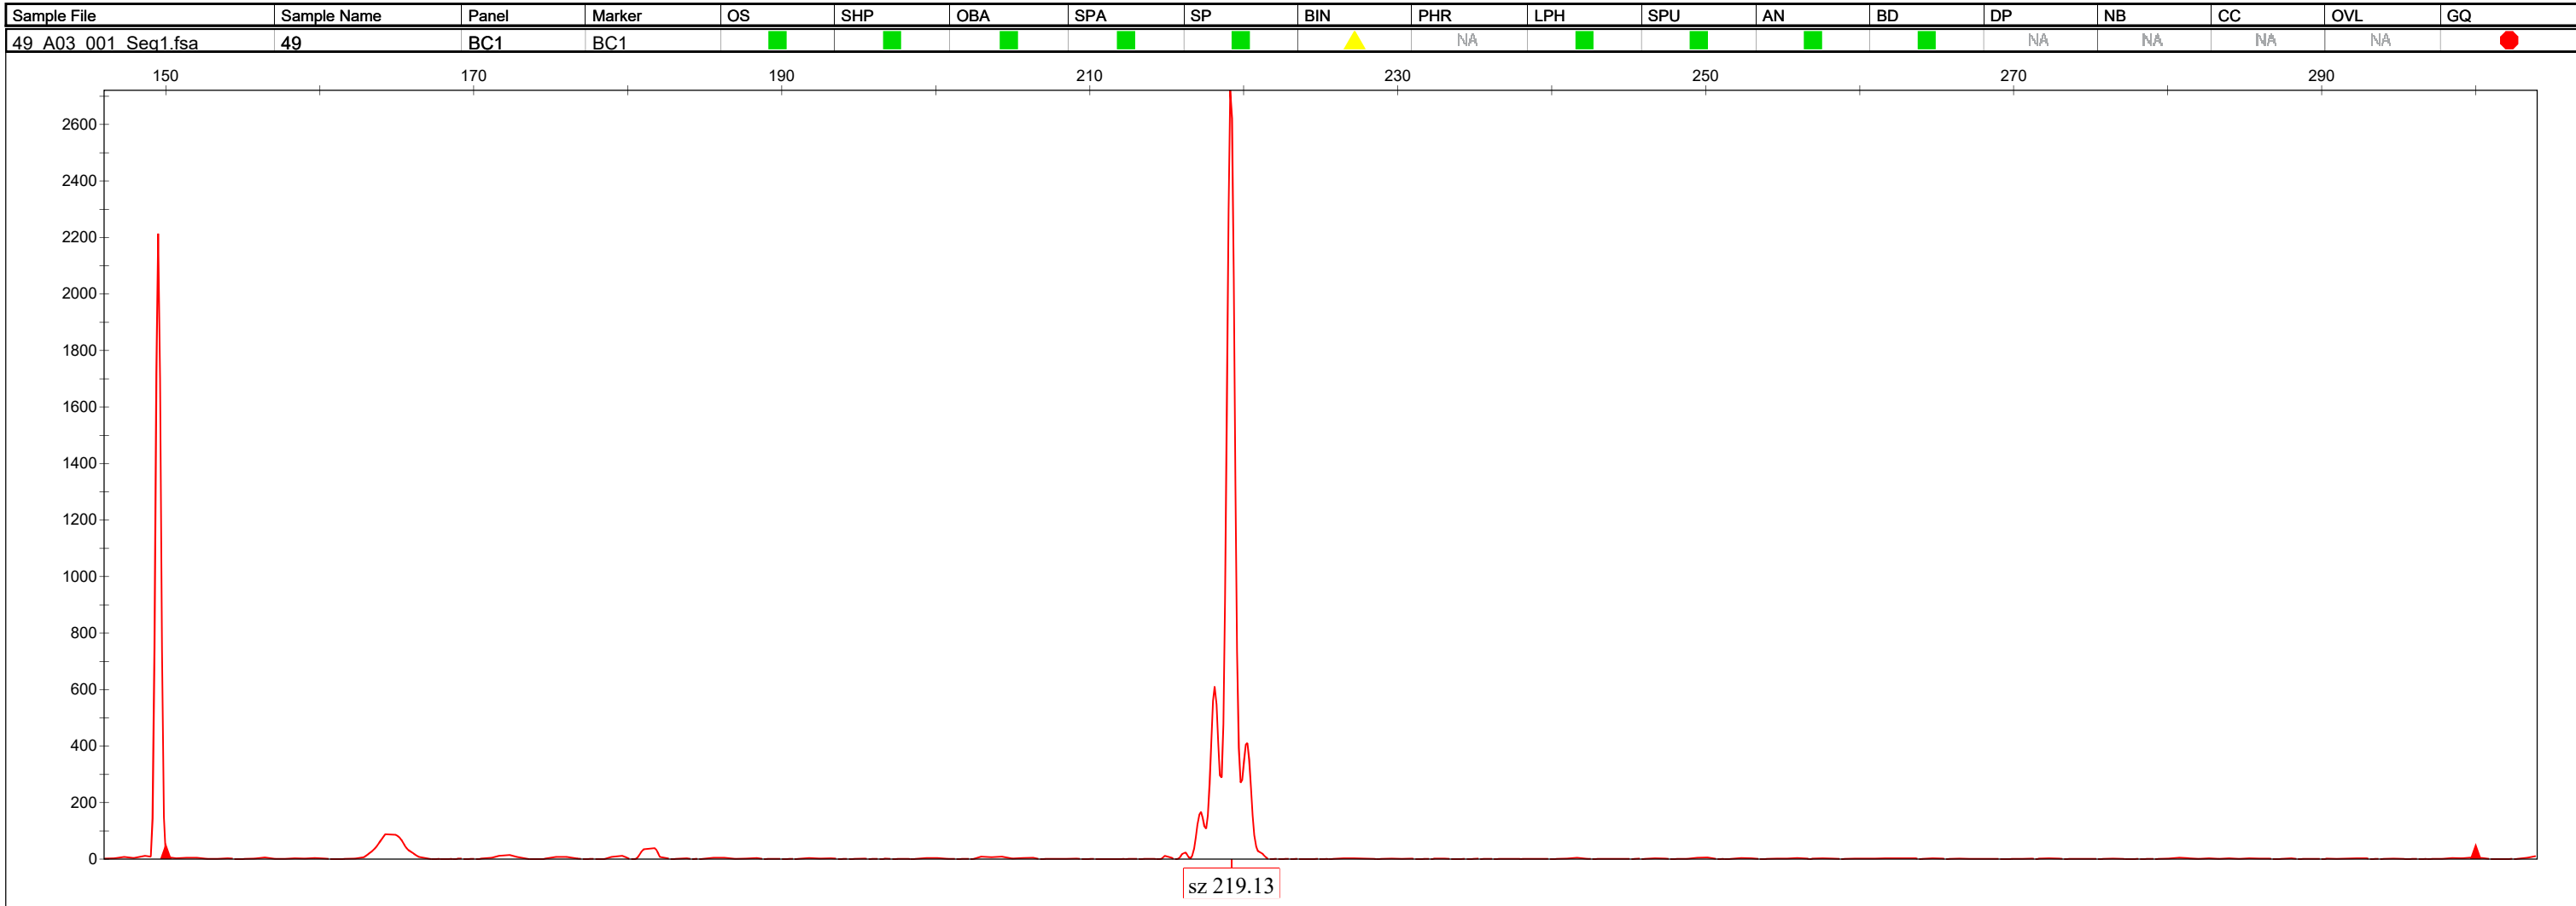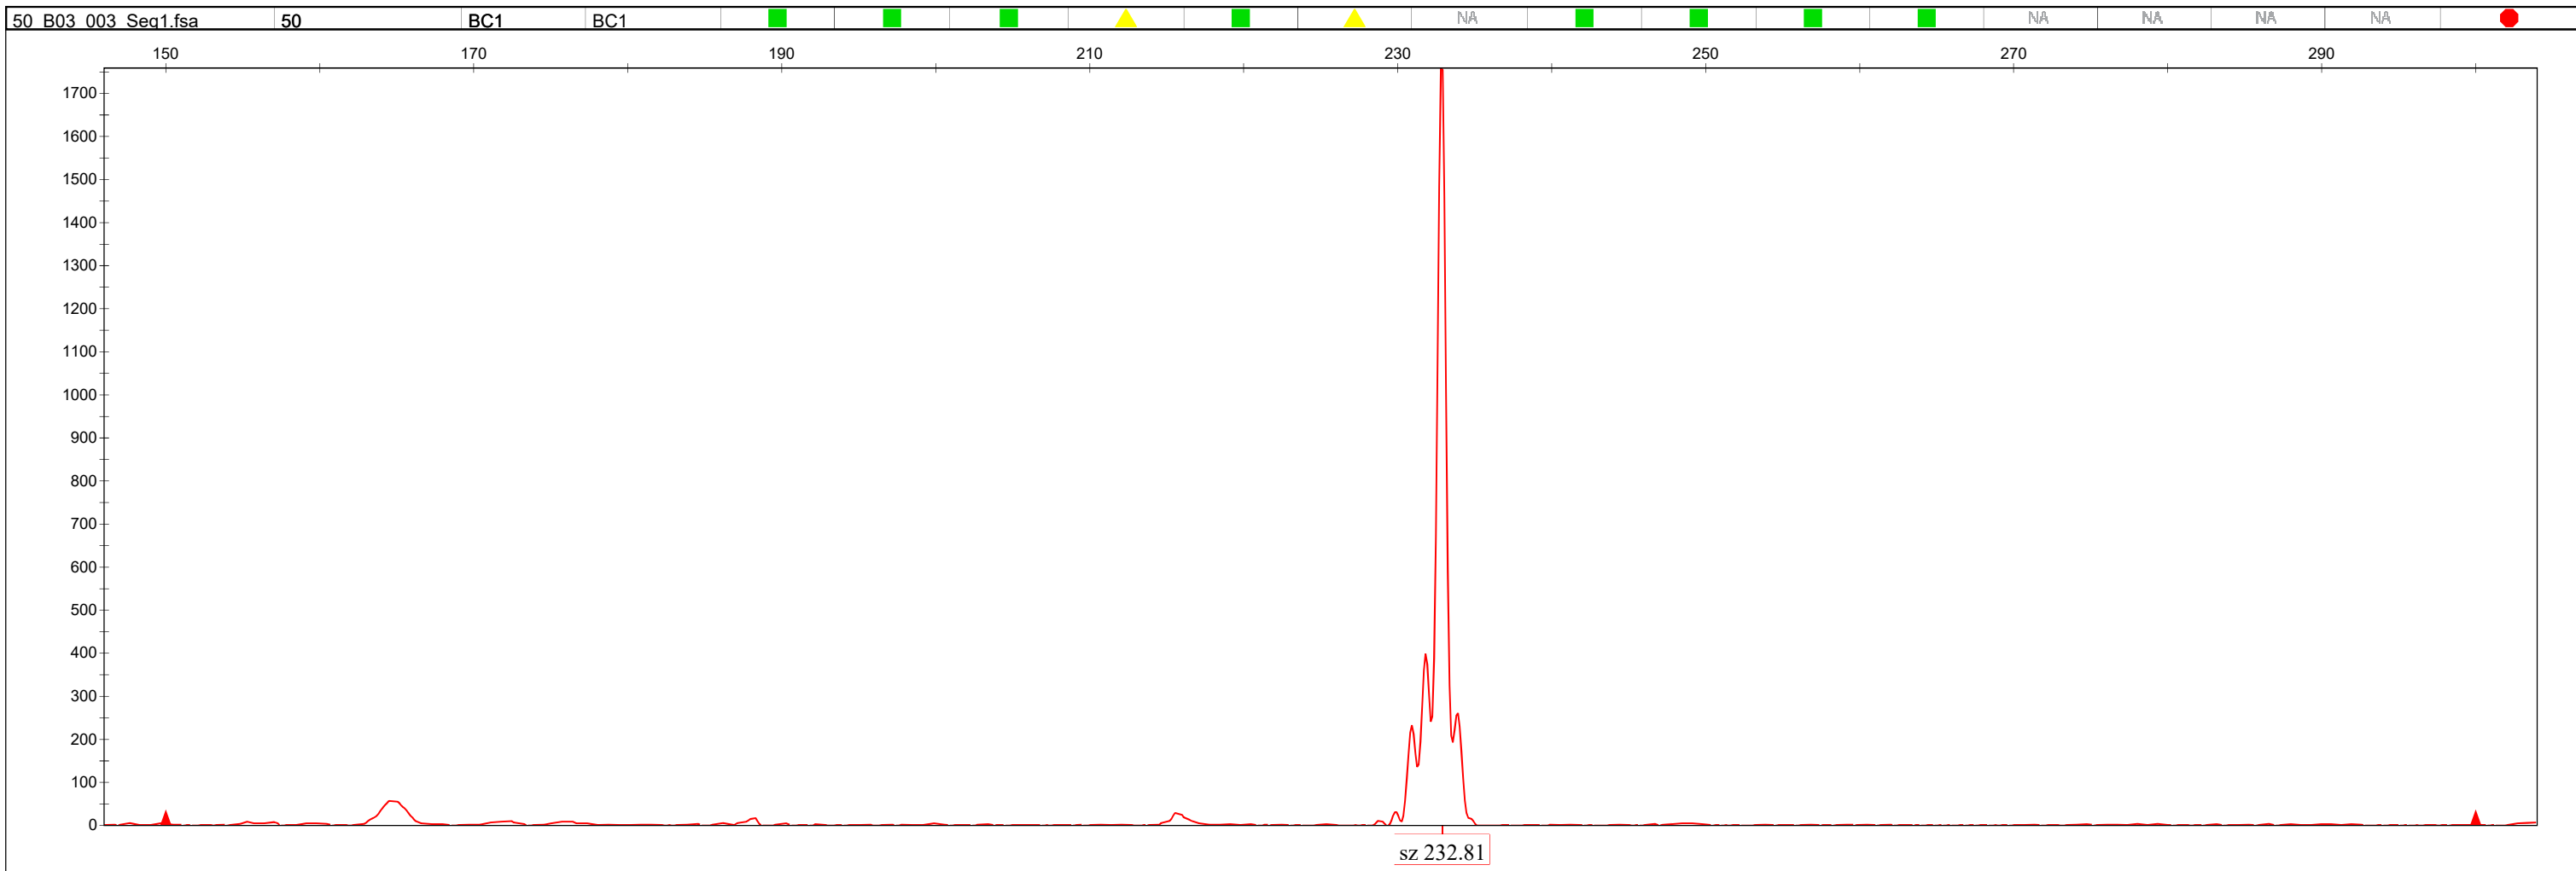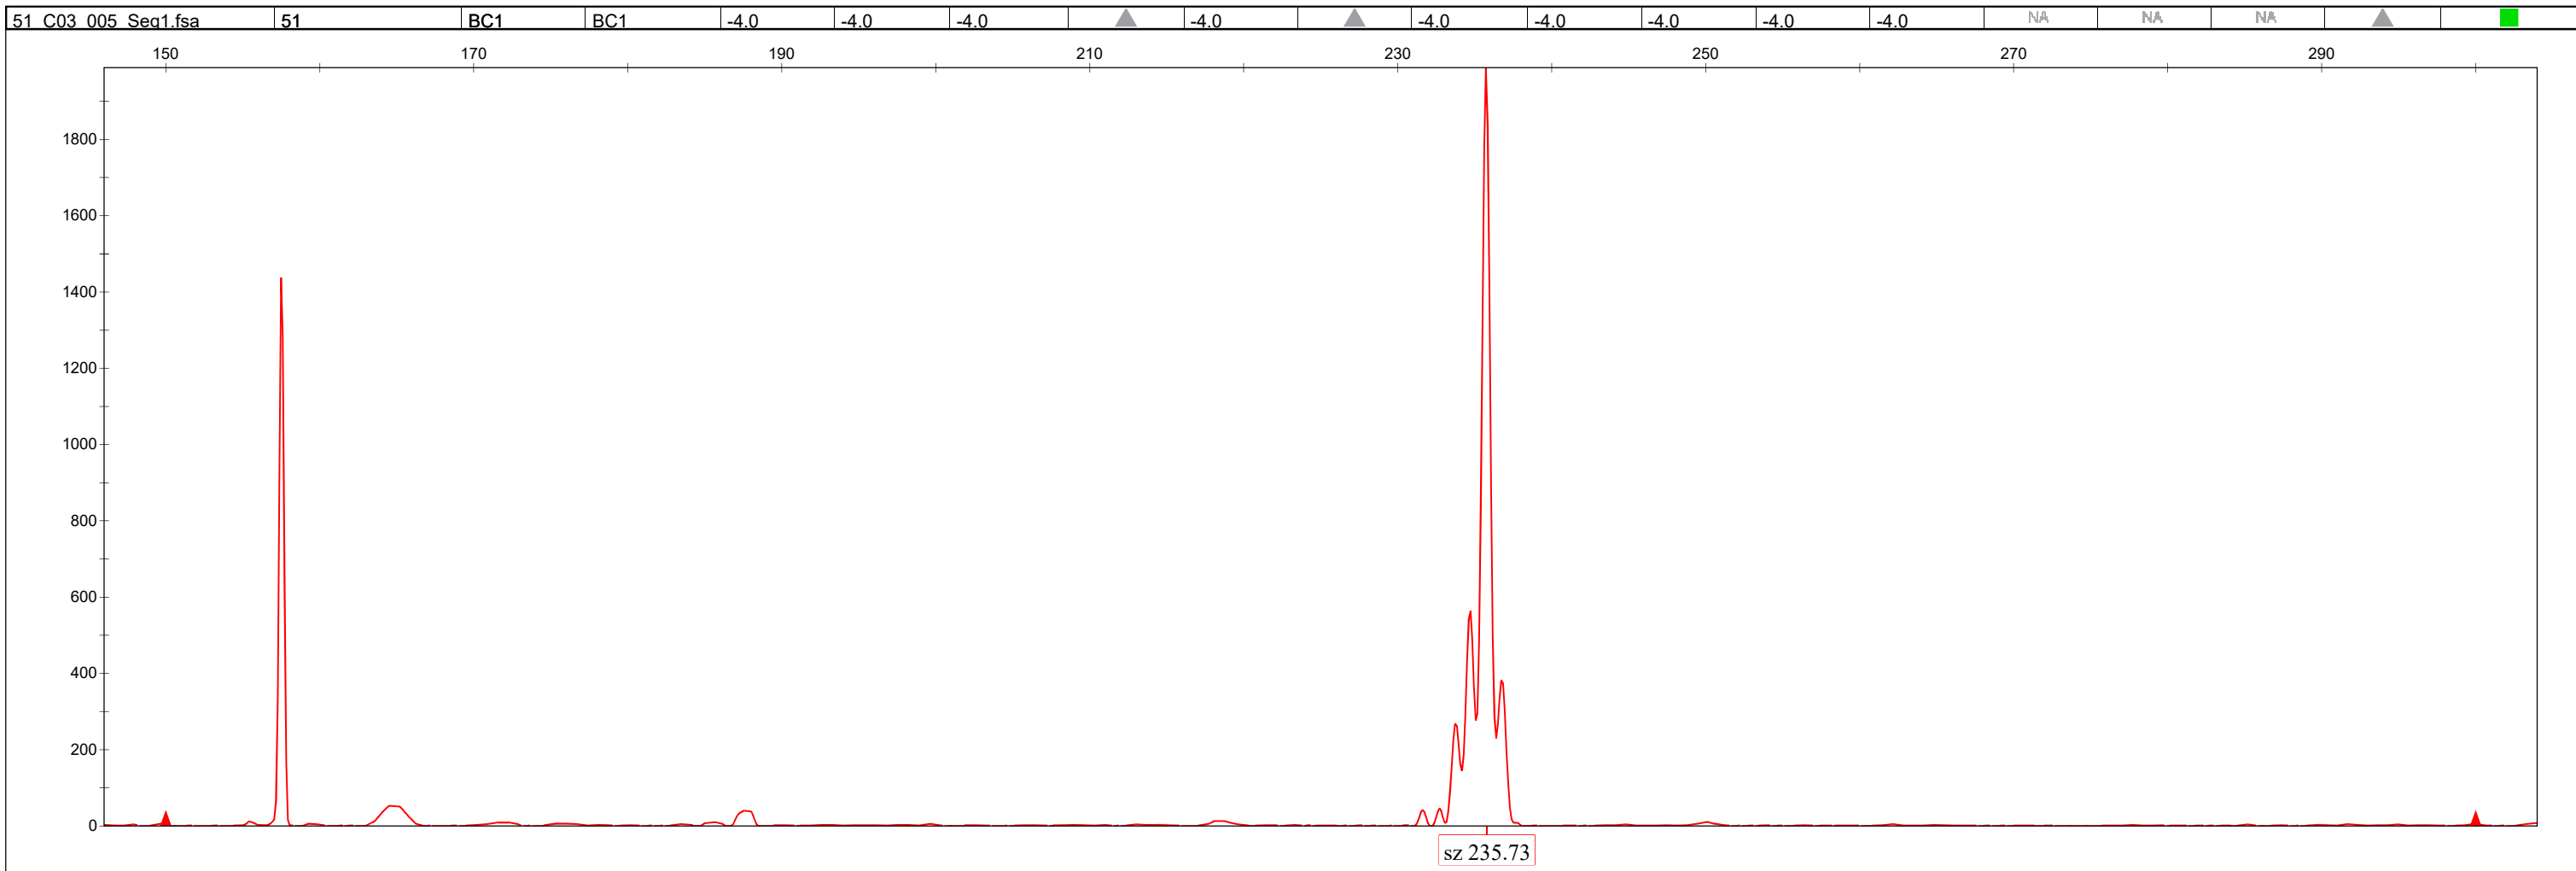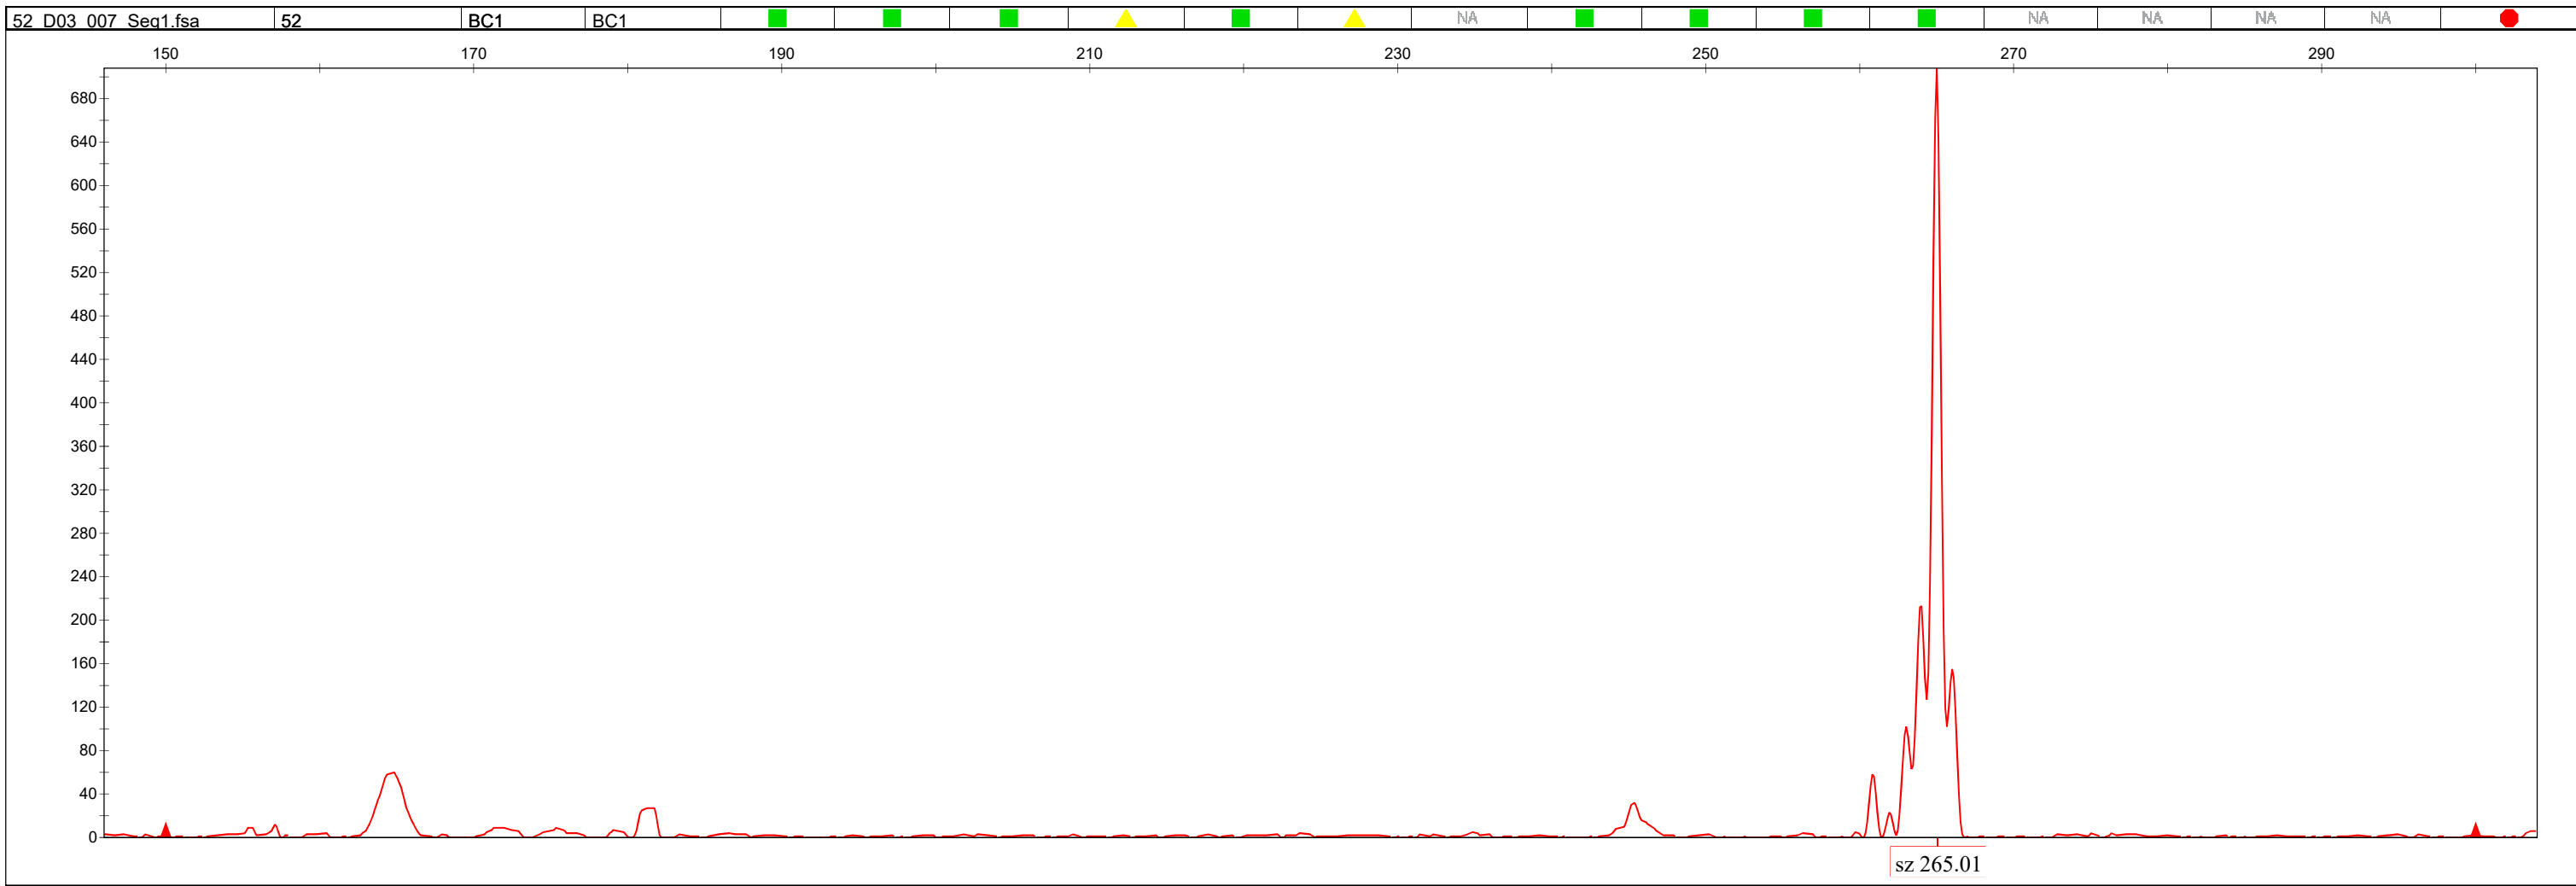

| Sample File         | Sample Name | Panel | Marker | OS   | SHP  | OBA  | SPA | SP   | BIN | PHR  | LPH  | SPU  | AN   | BD   | DP | PH | NB | CC | OV | QV |
|---------------------|-------------|-------|--------|------|------|------|-----|------|-----|------|------|------|------|------|----|----|----|----|----|----|
| 53_F03_009_Seq1.fsa | 53          | BC1   | BC1    | -4.0 | -4.0 | -4.0 |     | -4.0 |     | -4.0 | -4.0 | -4.0 | -4.0 | -4.0 |    | NA | NA | NA |    |    |

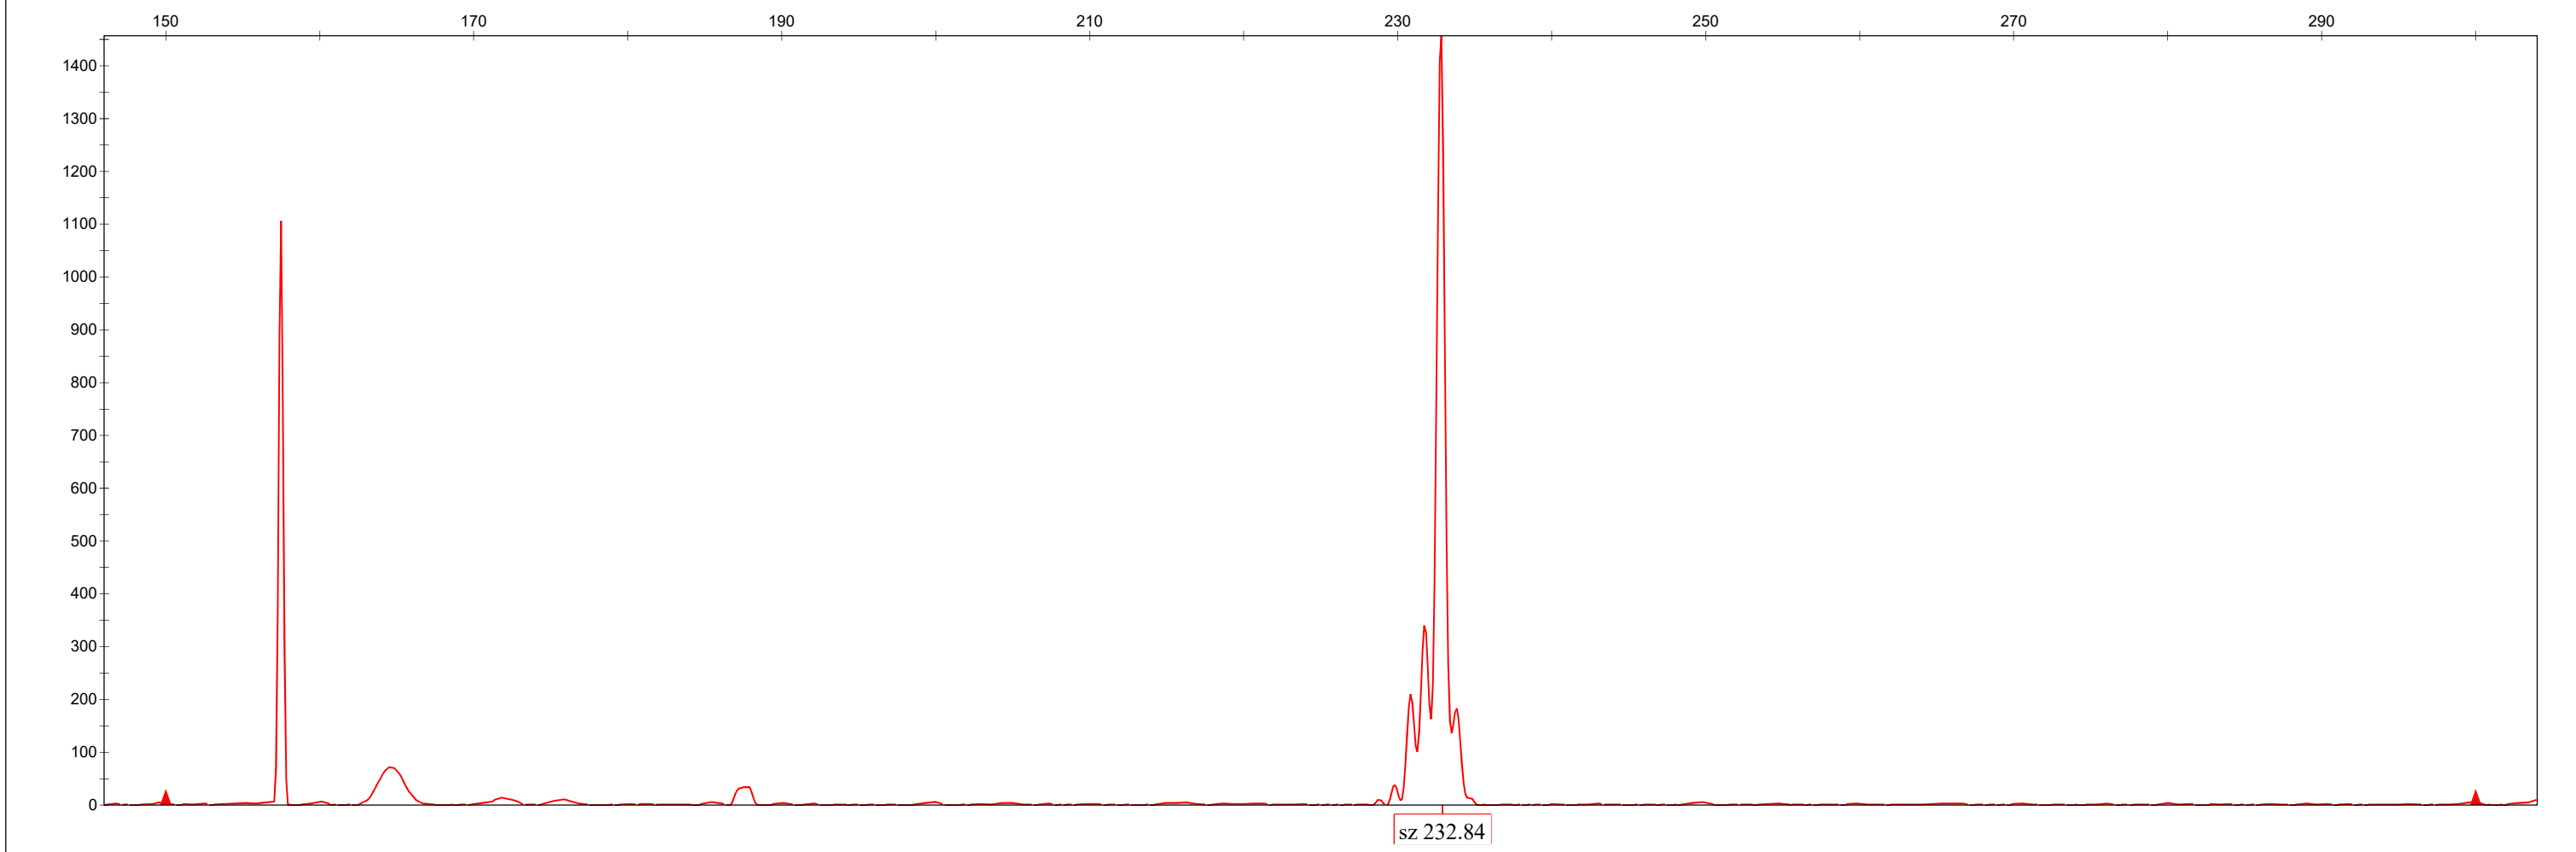

|                     |    |     |     |  |  |  |  |  |  |  |  |  |  |  |  |    |    |    |    |  |
|---------------------|----|-----|-----|--|--|--|--|--|--|--|--|--|--|--|--|----|----|----|----|--|
| 54_F03_011_Seq1.fsa | 54 | BC1 | BC1 |  |  |  |  |  |  |  |  |  |  |  |  | NA | NA | NA | NA |  |
|---------------------|----|-----|-----|--|--|--|--|--|--|--|--|--|--|--|--|----|----|----|----|--|

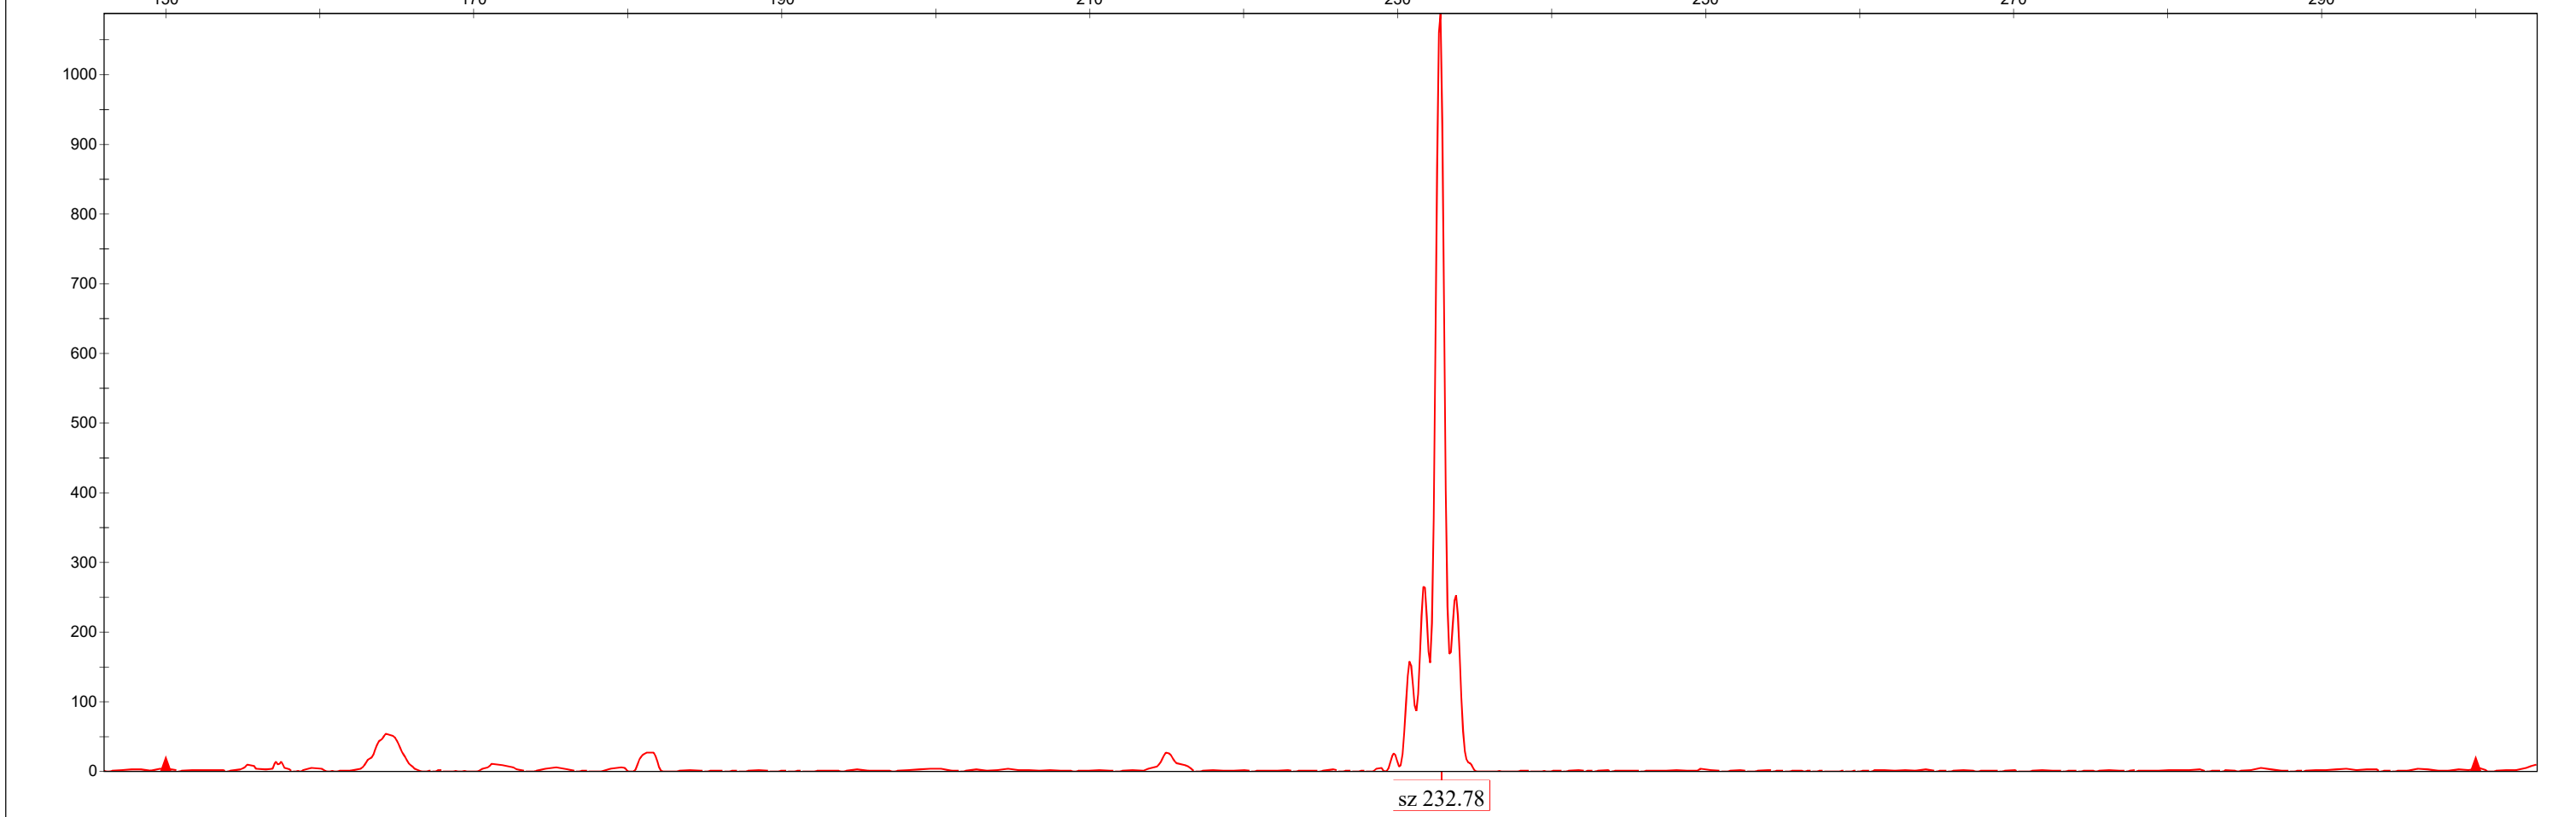

|                     |    |     |     |  |  |  |  |  |  |  |  |  |  |  |  |    |    |    |    |  |
|---------------------|----|-----|-----|--|--|--|--|--|--|--|--|--|--|--|--|----|----|----|----|--|
| 55_G03_013_Seq1.fsa | 55 | BC1 | BC1 |  |  |  |  |  |  |  |  |  |  |  |  | NA | NA | NA | NA |  |
|---------------------|----|-----|-----|--|--|--|--|--|--|--|--|--|--|--|--|----|----|----|----|--|

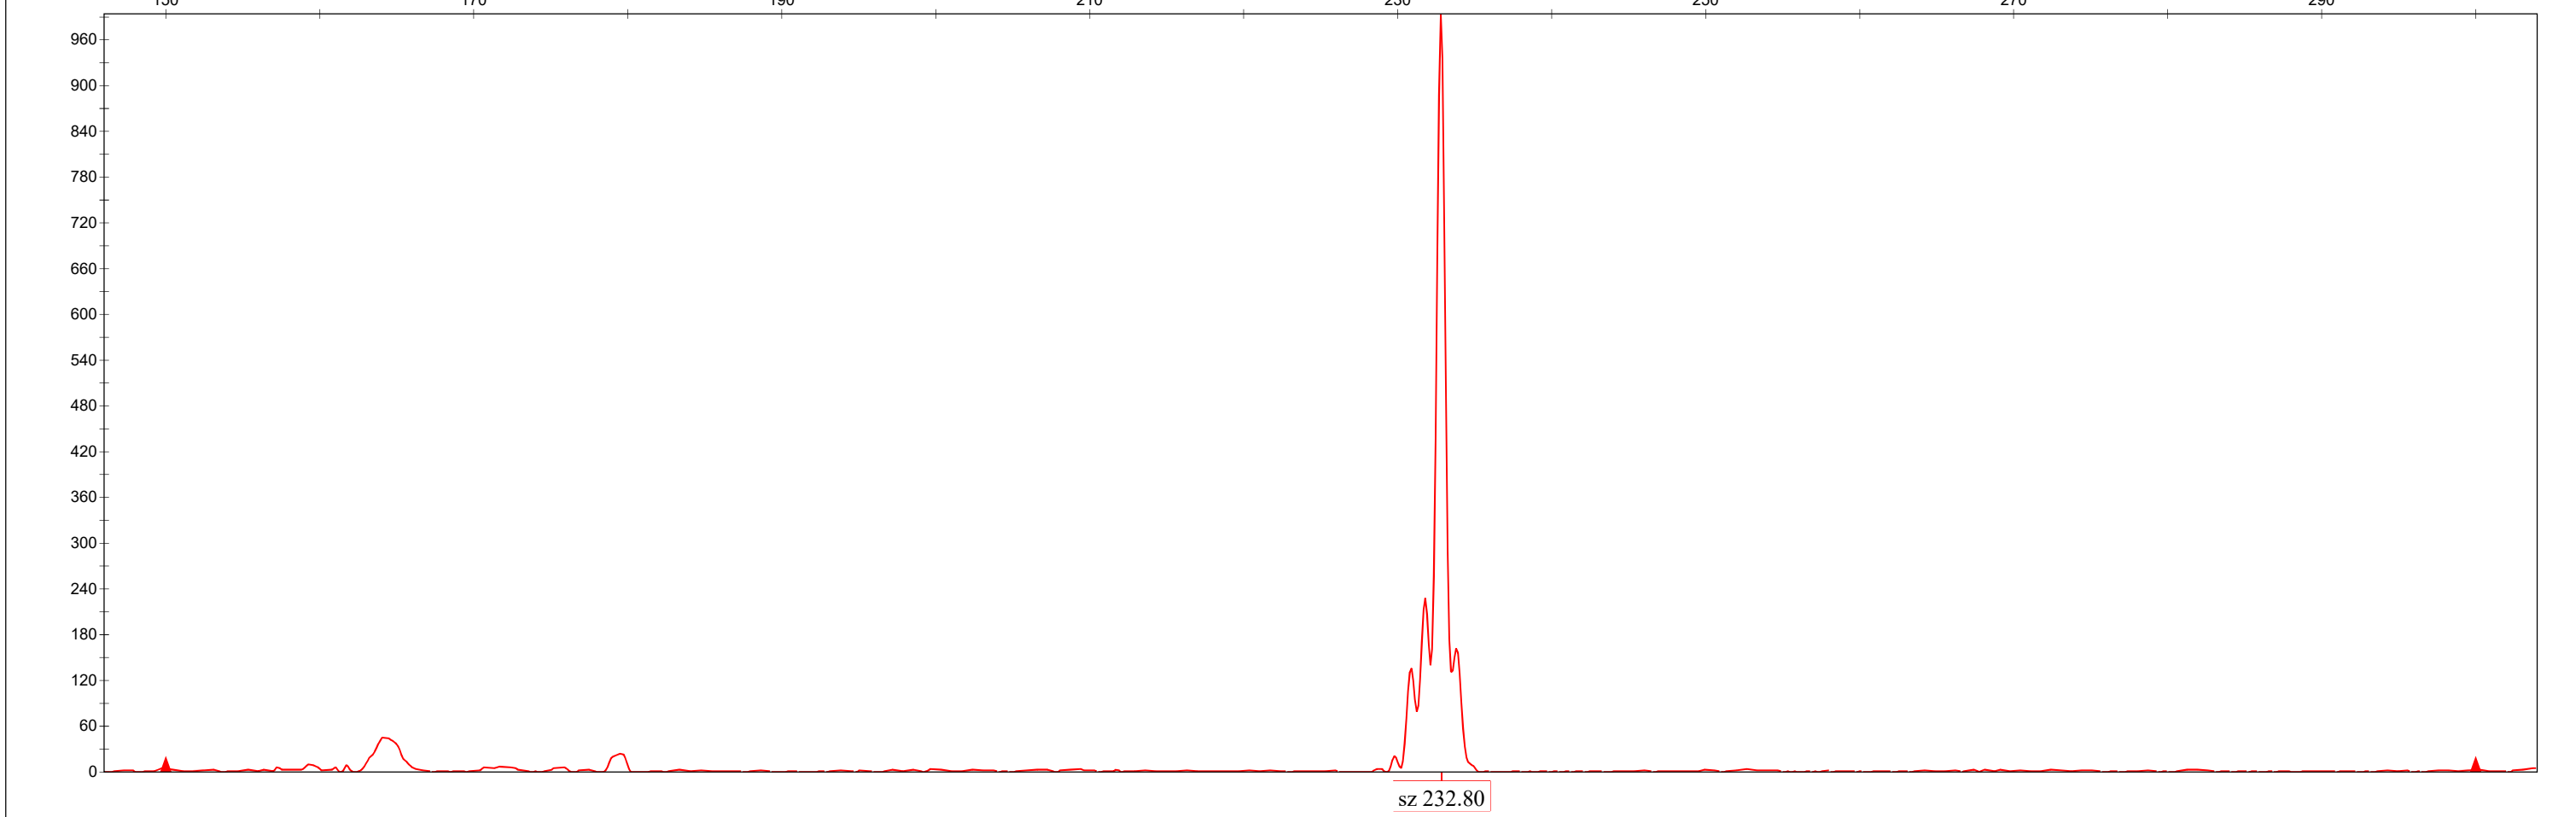

|                     |    |     |     |      |      |      |  |      |  |      |      |      |      |  |    |    |    |  |  |
|---------------------|----|-----|-----|------|------|------|--|------|--|------|------|------|------|--|----|----|----|--|--|
| 56_H03_015_Seq1.fsa | 56 | BC1 | BC1 | -4.0 | -4.0 | -4.0 |  | -4.0 |  | -4.0 | -4.0 | -4.0 | -4.0 |  | NA | NA | NA |  |  |
|---------------------|----|-----|-----|------|------|------|--|------|--|------|------|------|------|--|----|----|----|--|--|

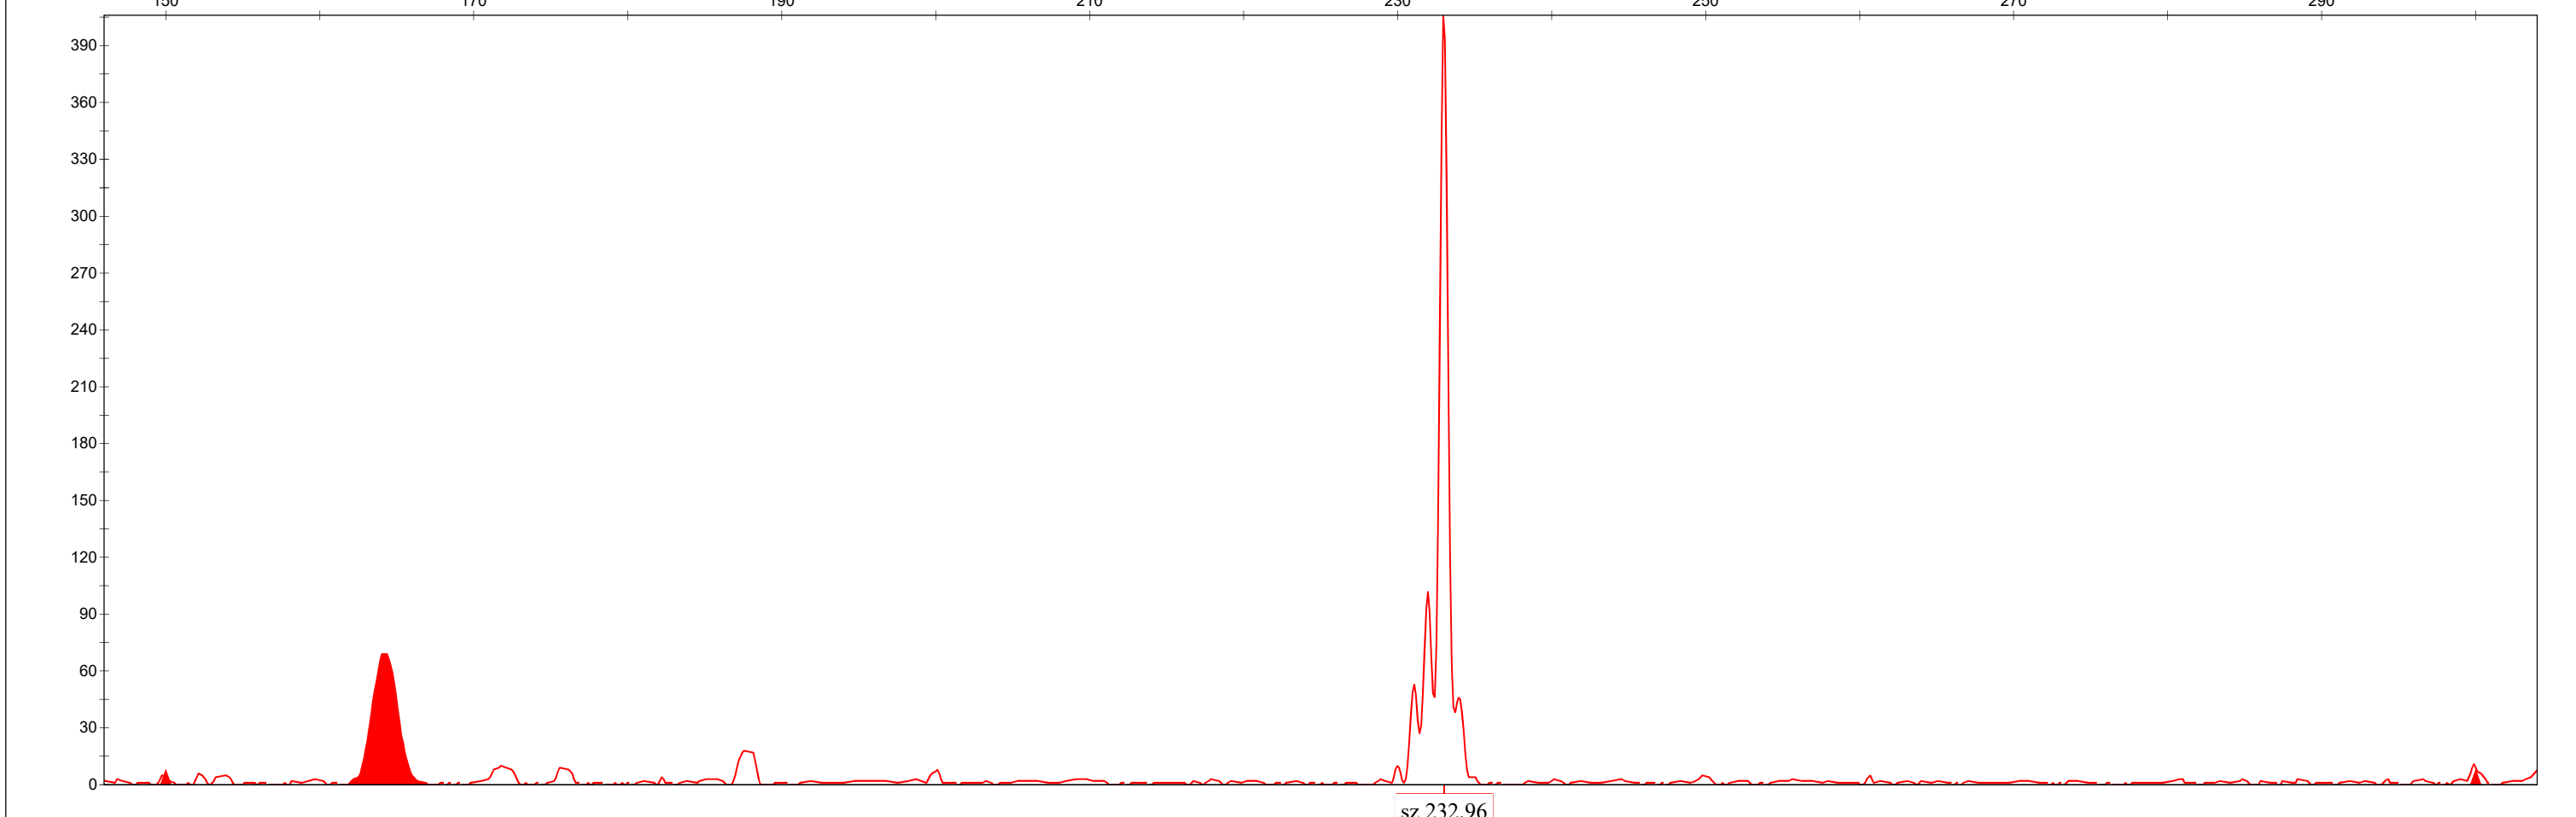

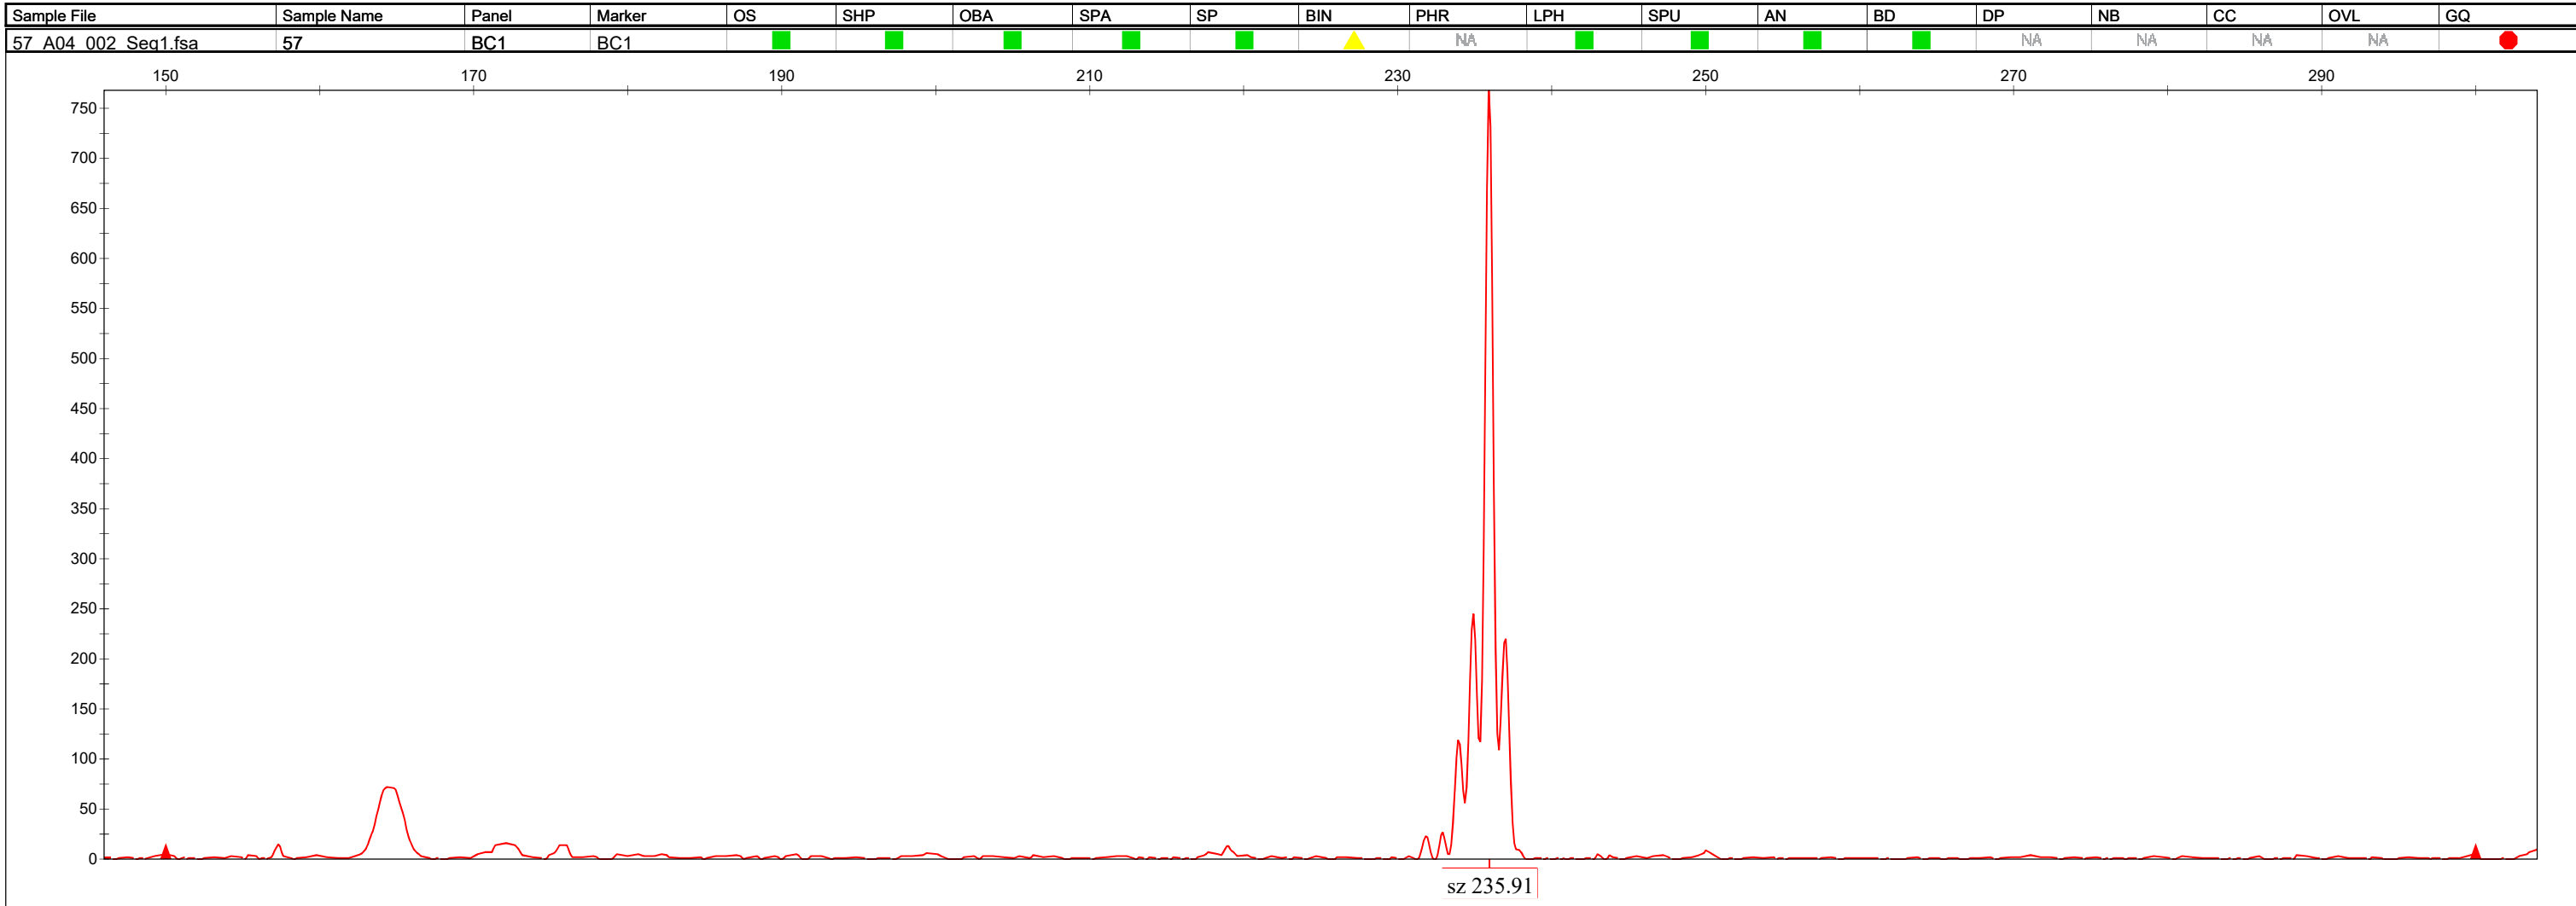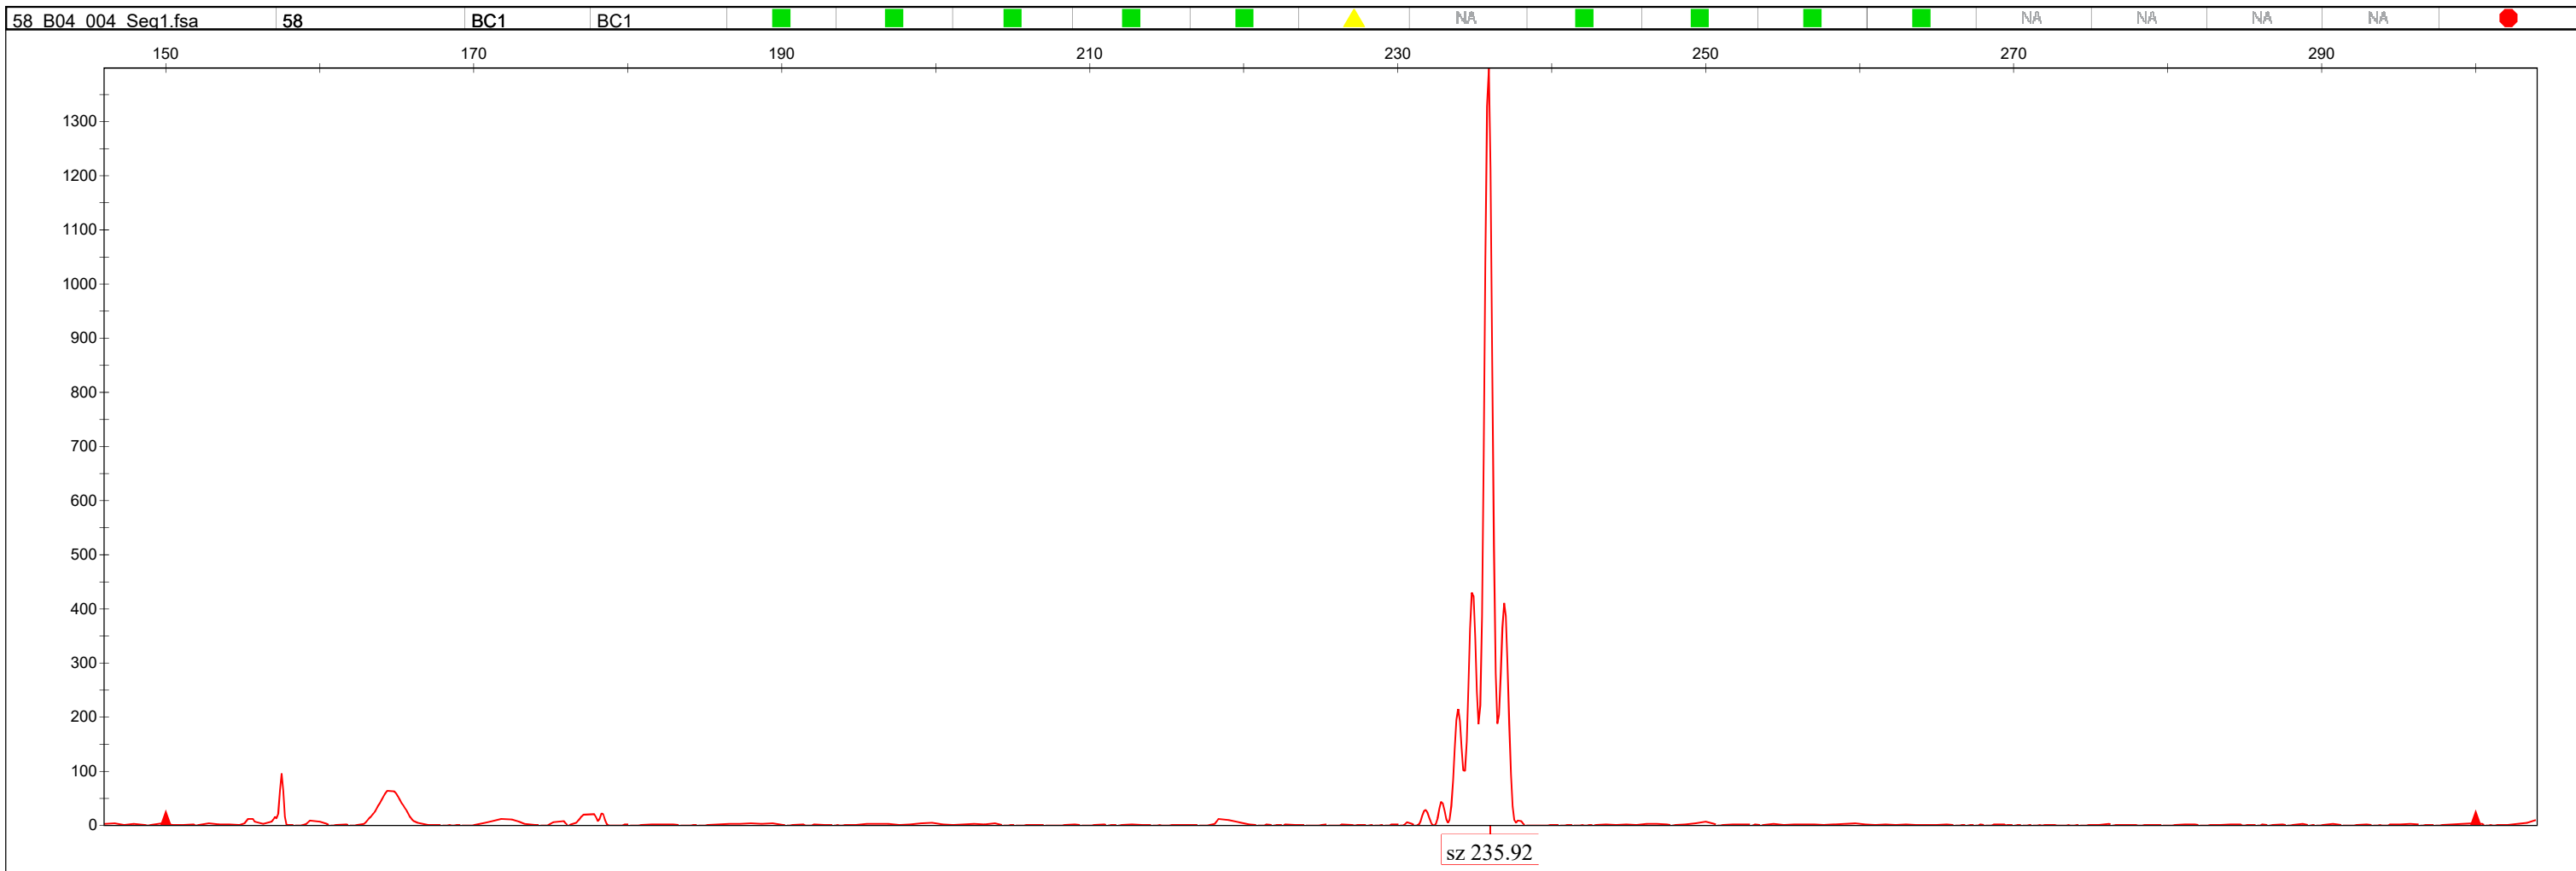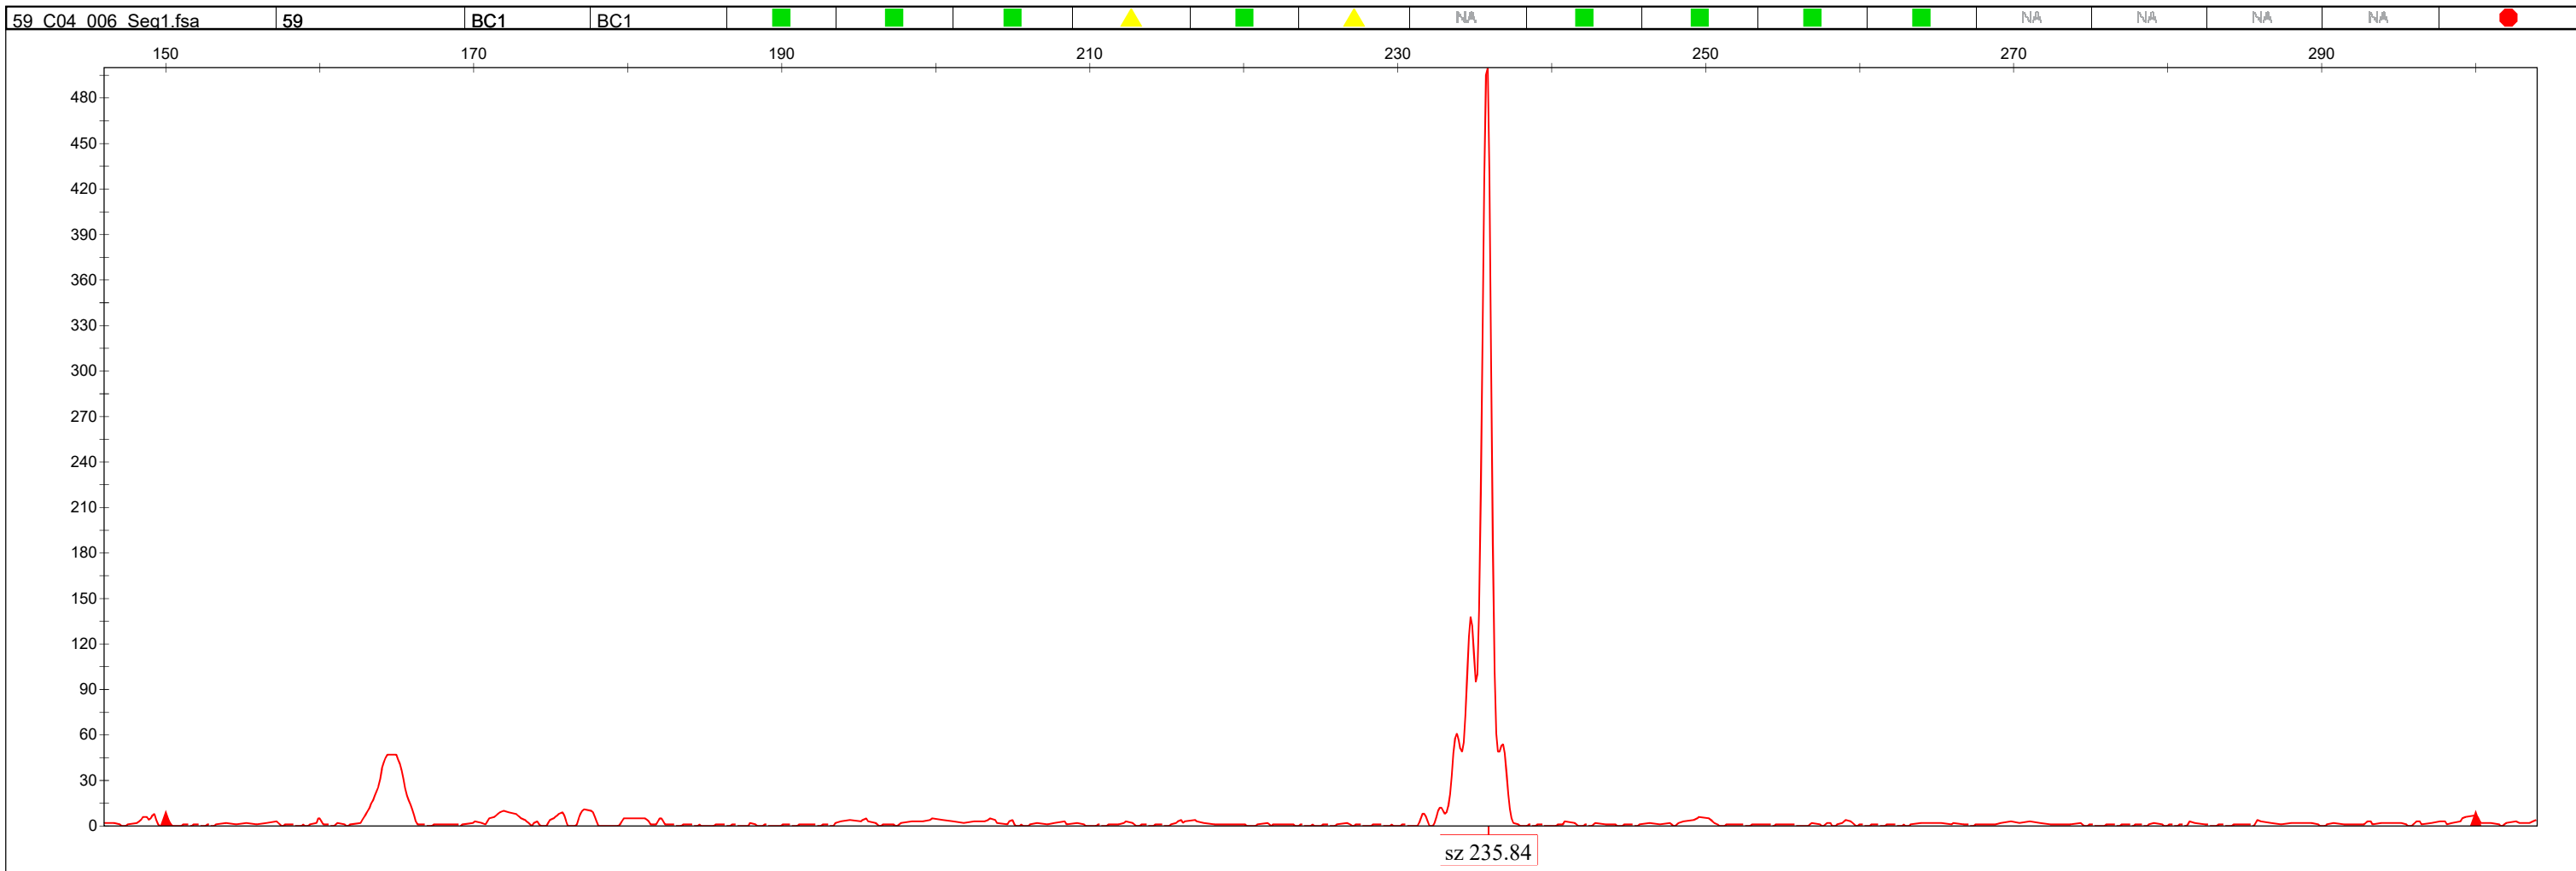

Supplement: s1 [file s1]
