# Supplementary material for: Molecular Biological Methods to Assess Different Botrytis cinerea Strains on Grapes
Source: MDPI journal article supplement (doi:10.3390/microbiolres15020037), 2024-04-19

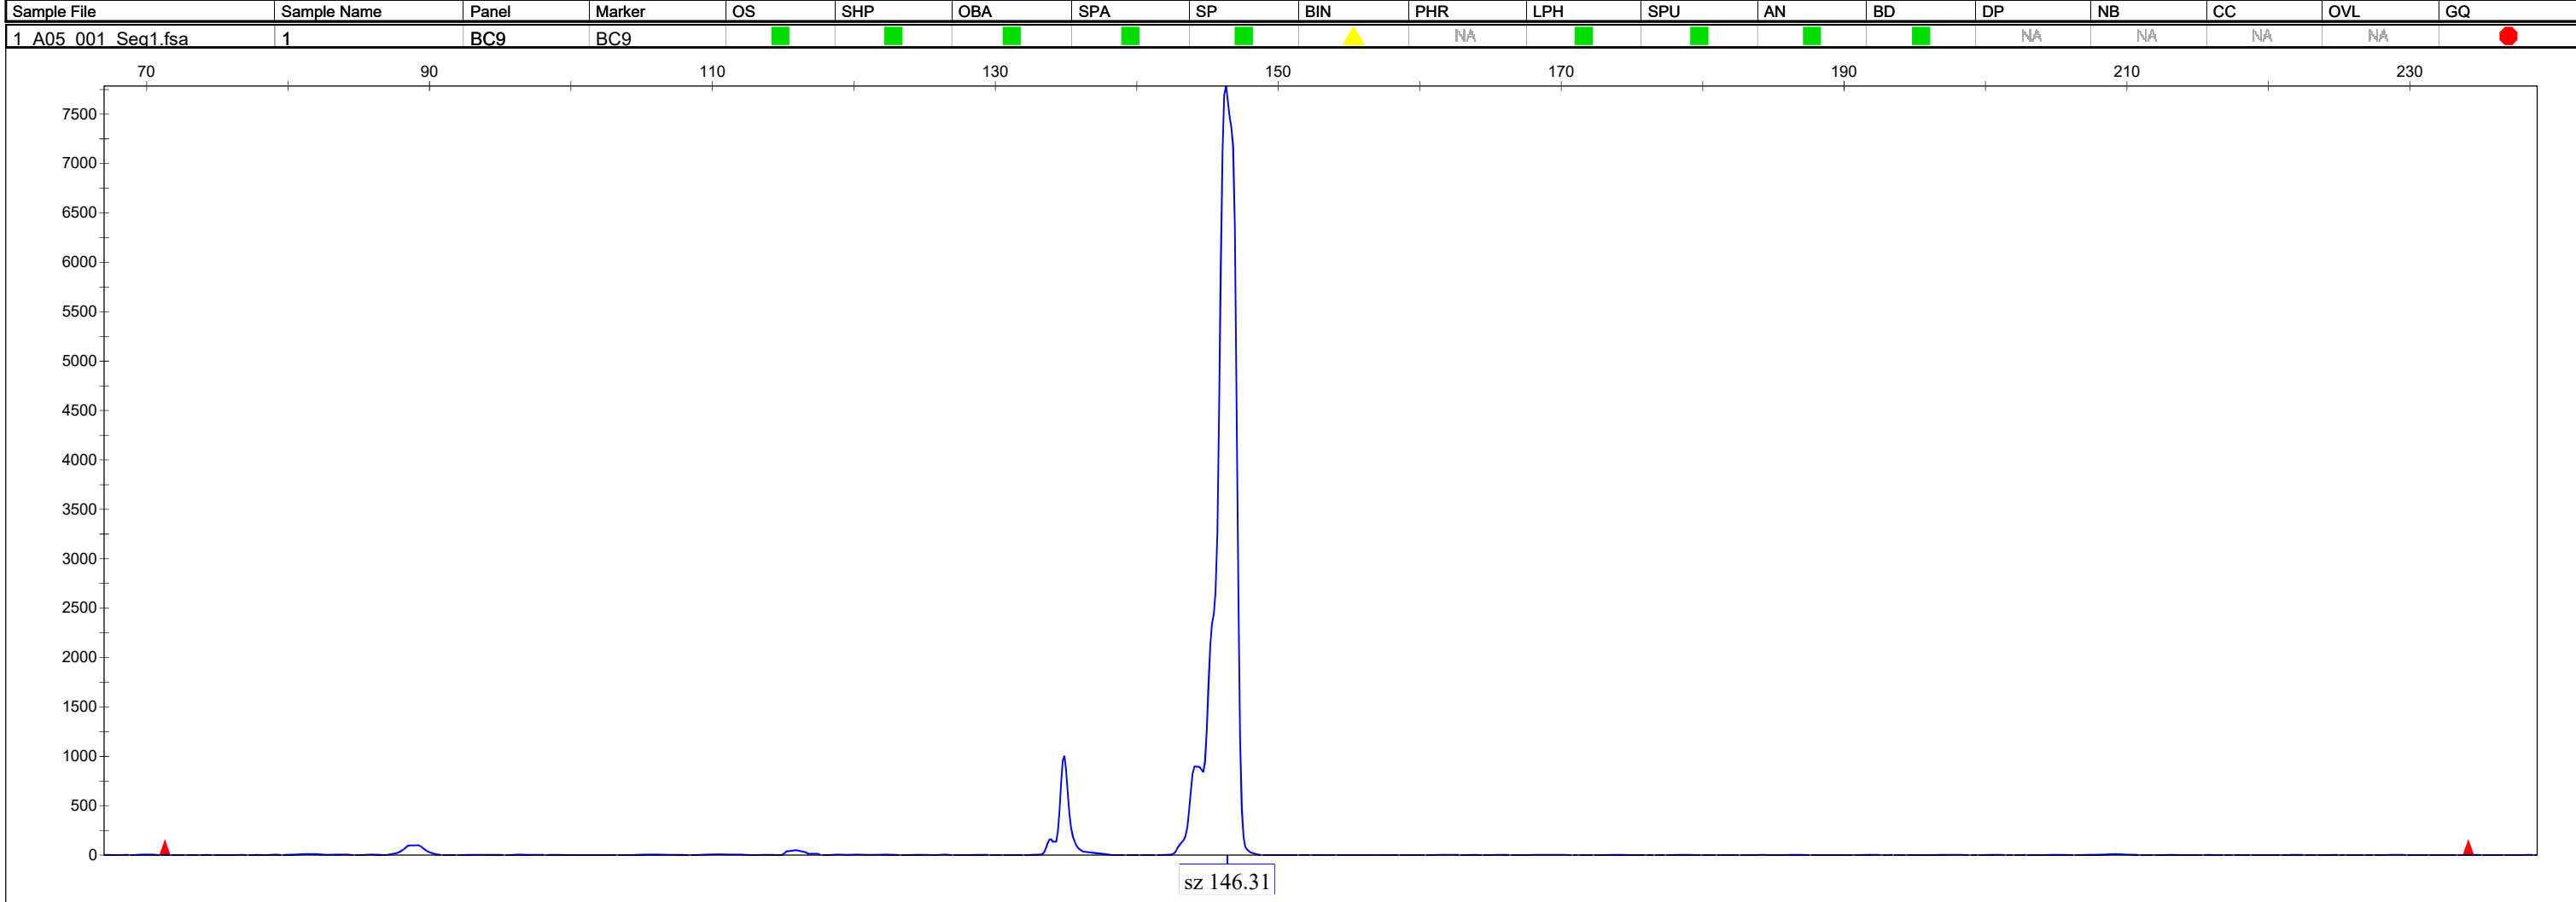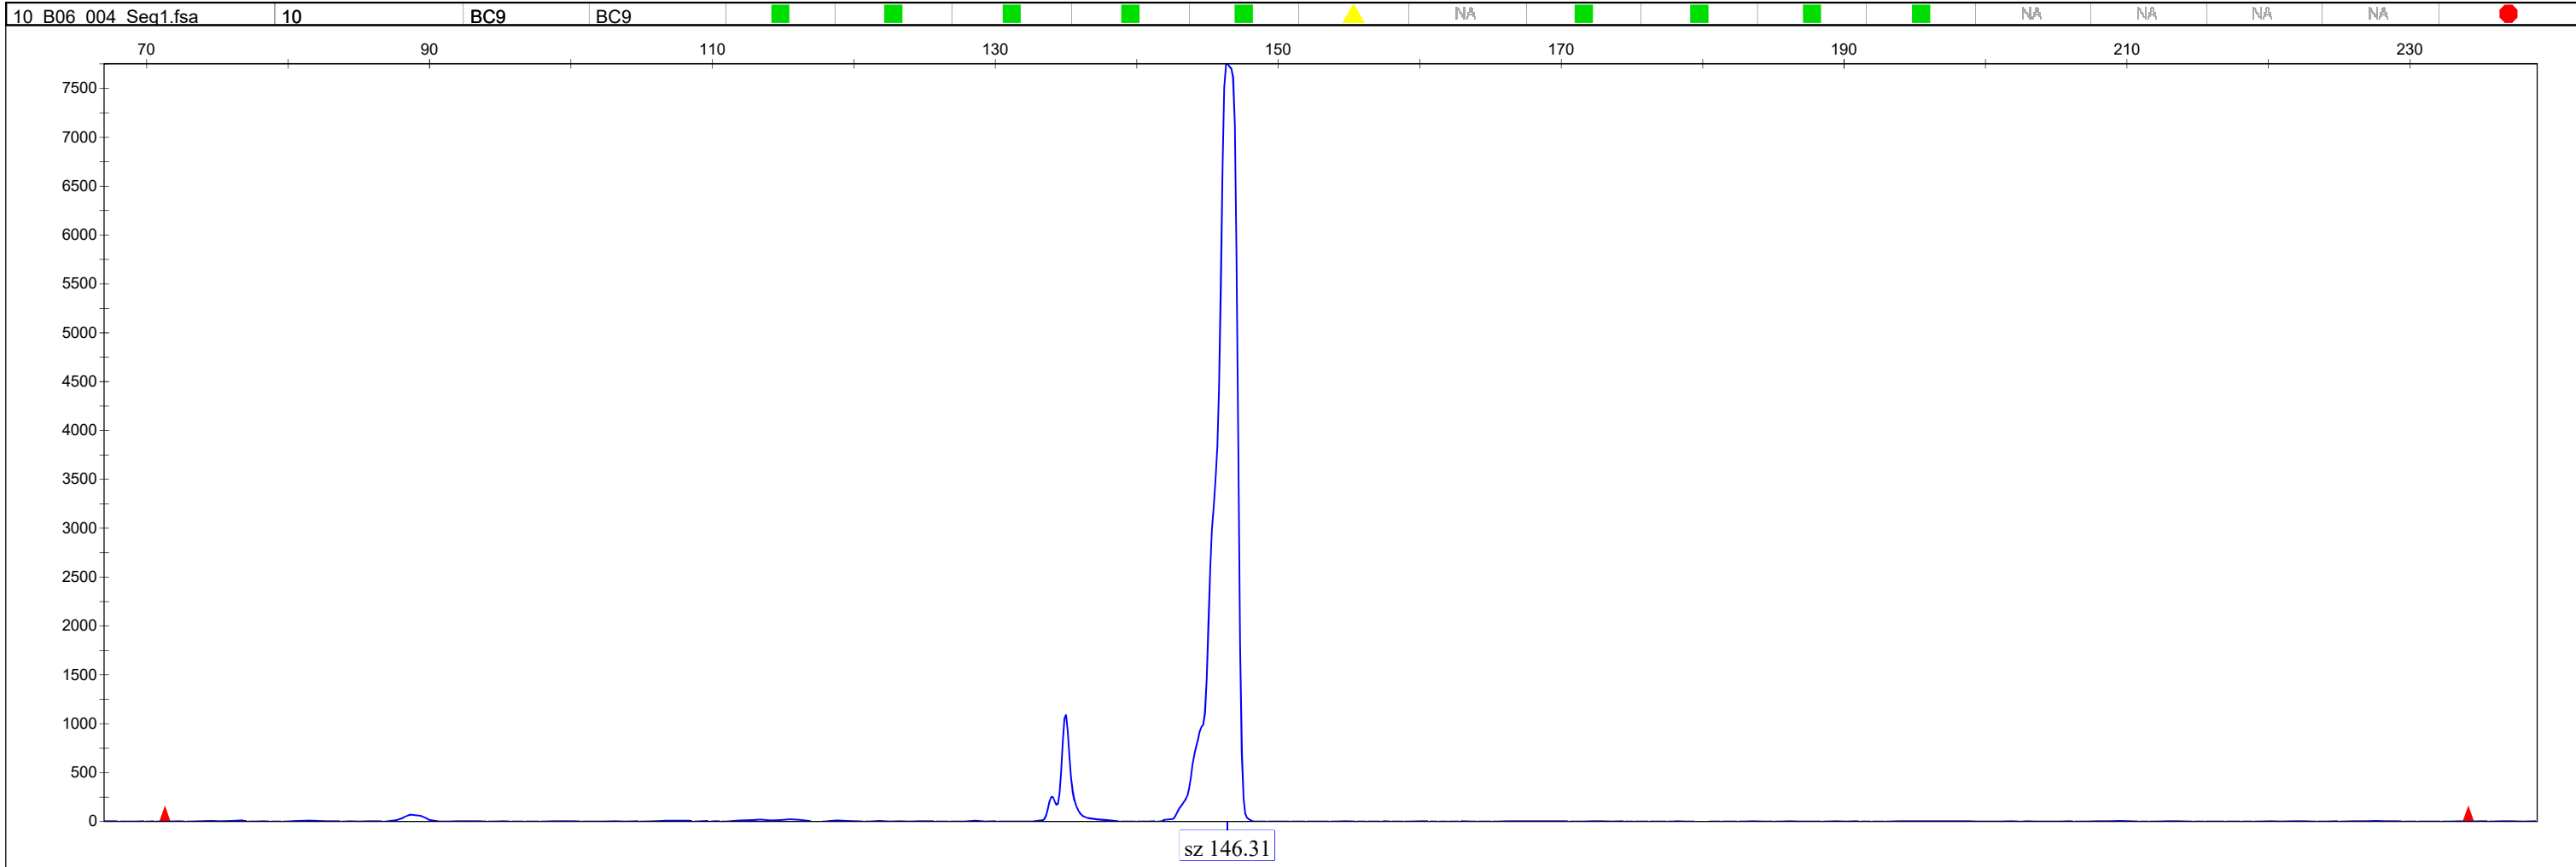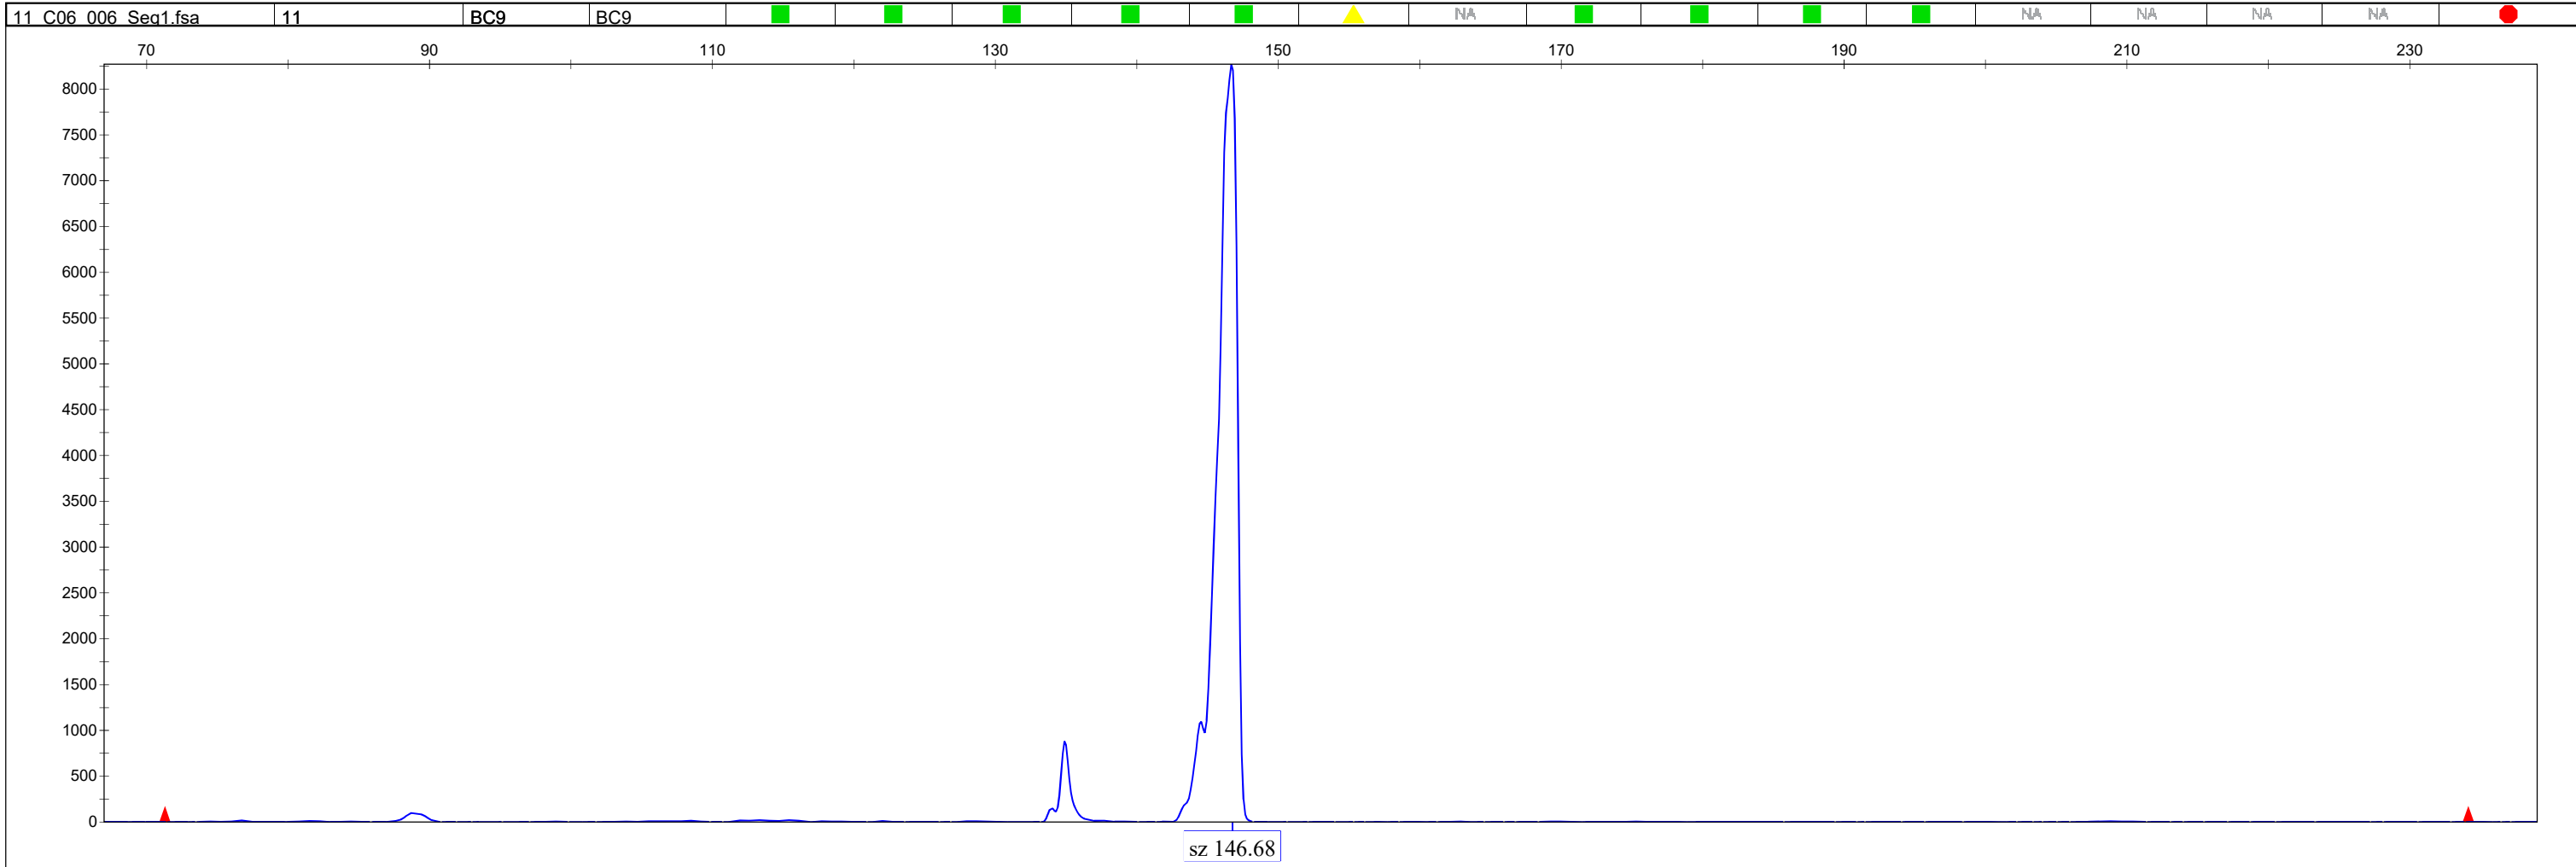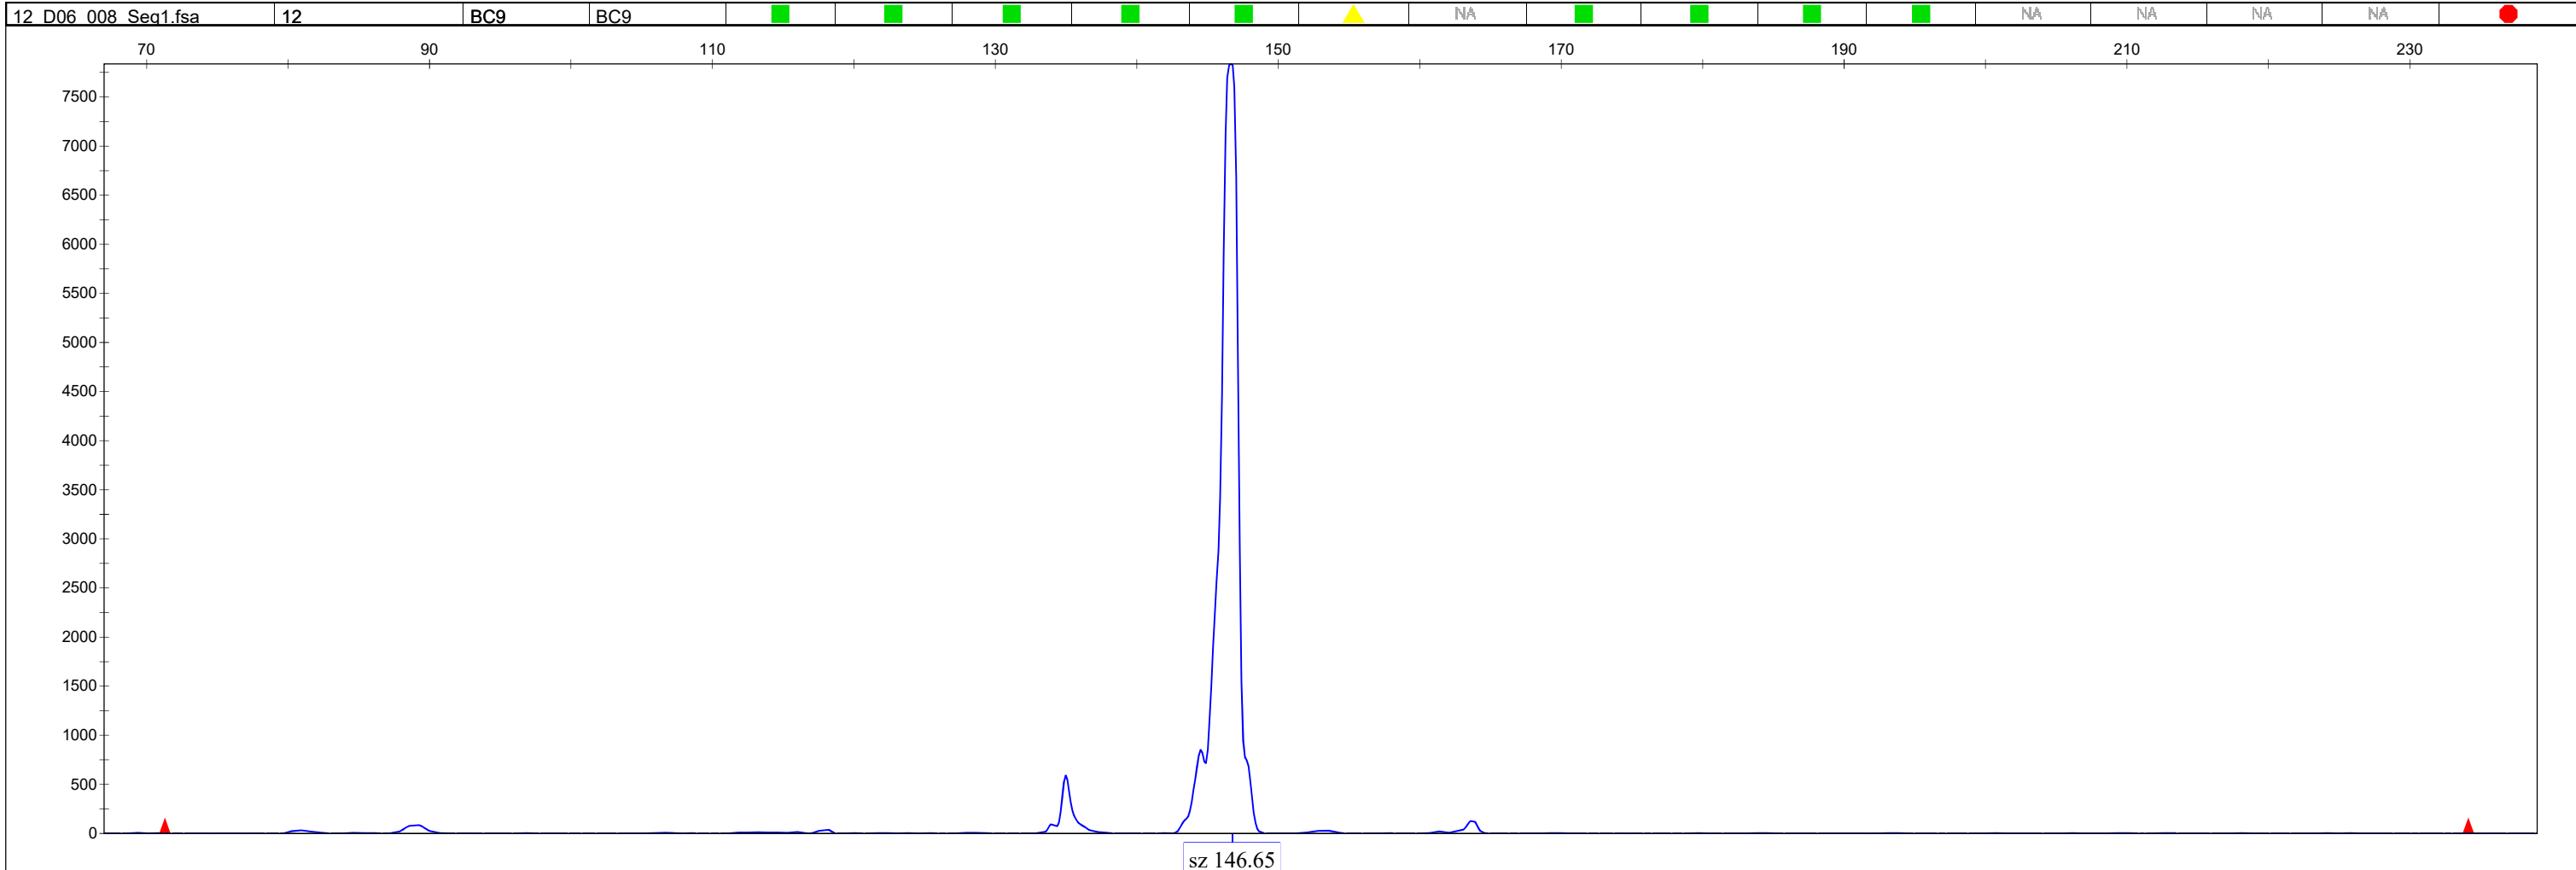

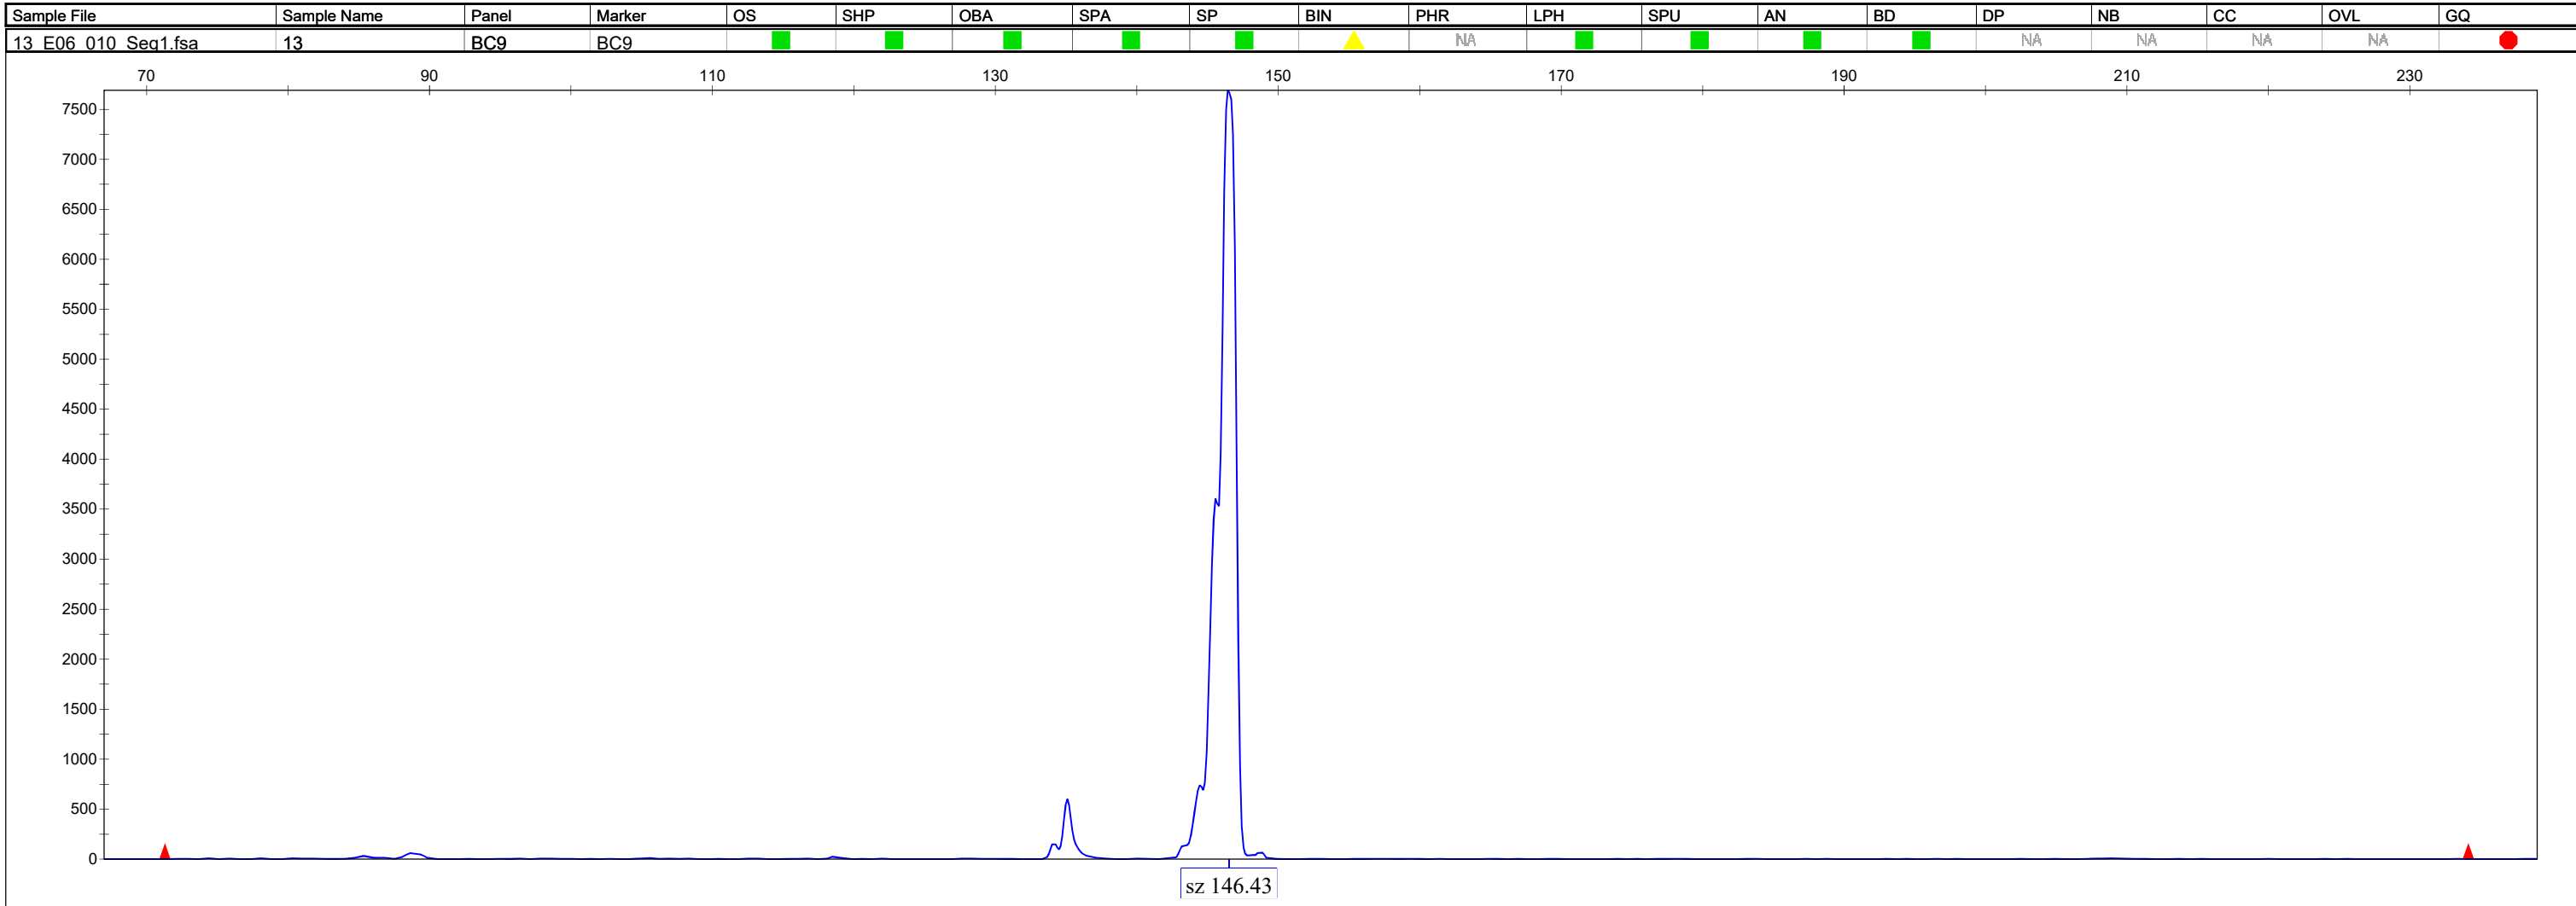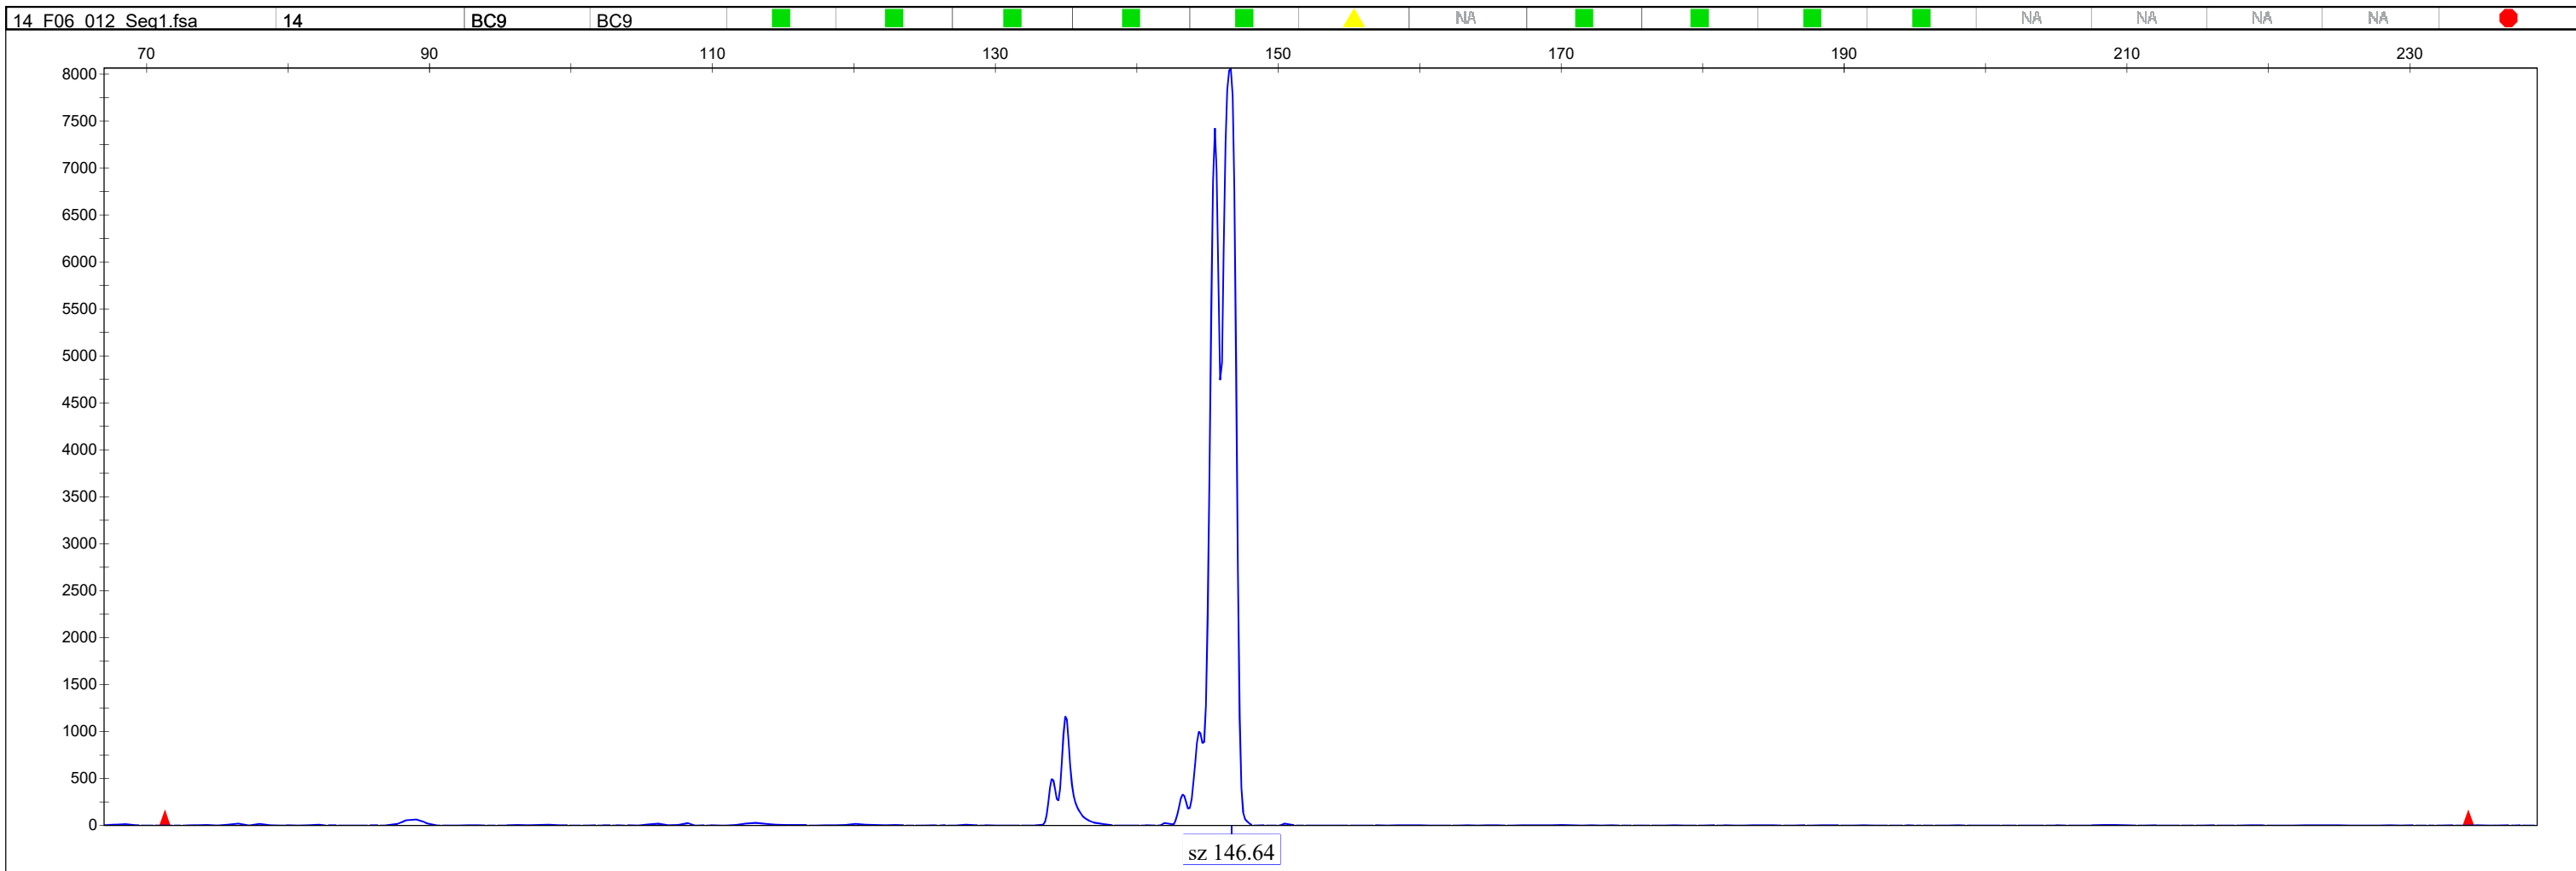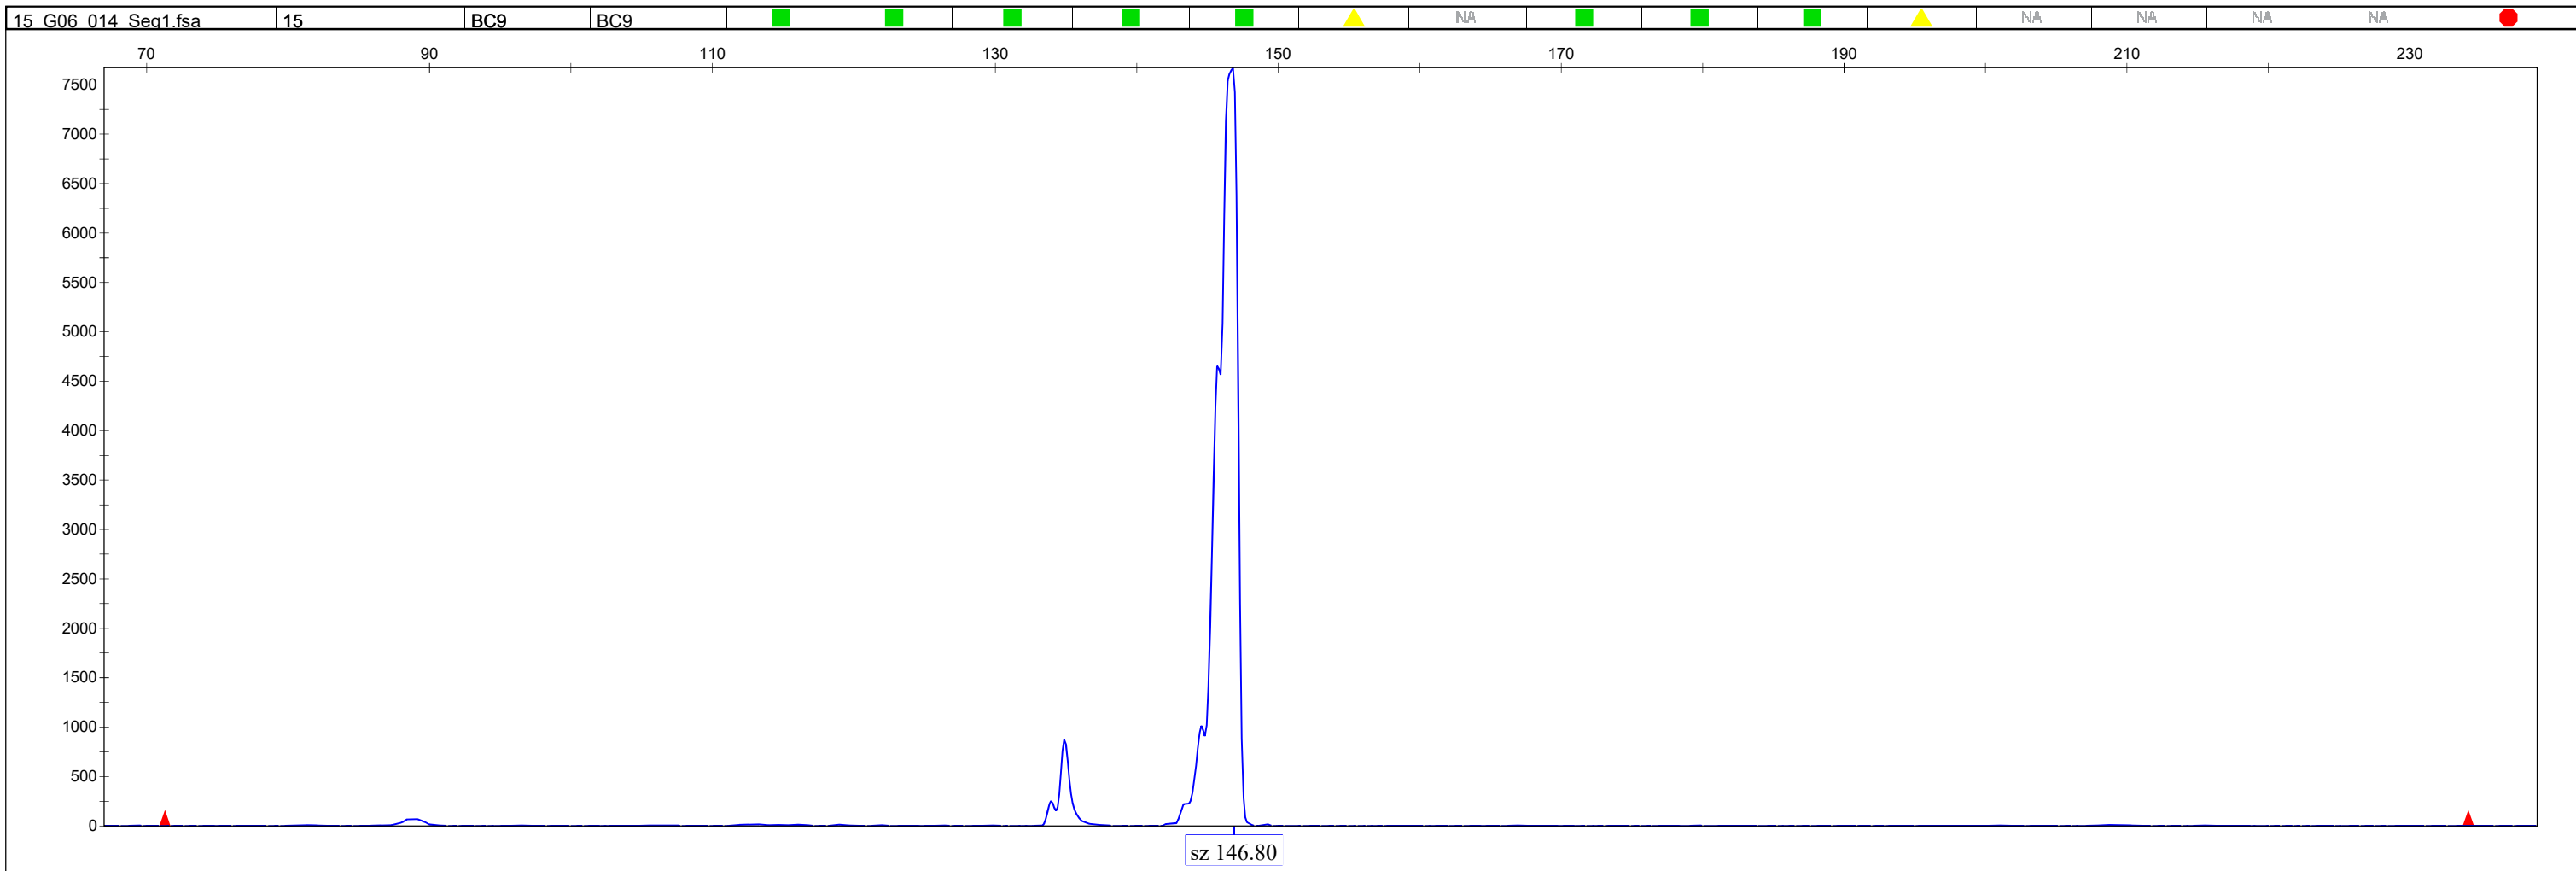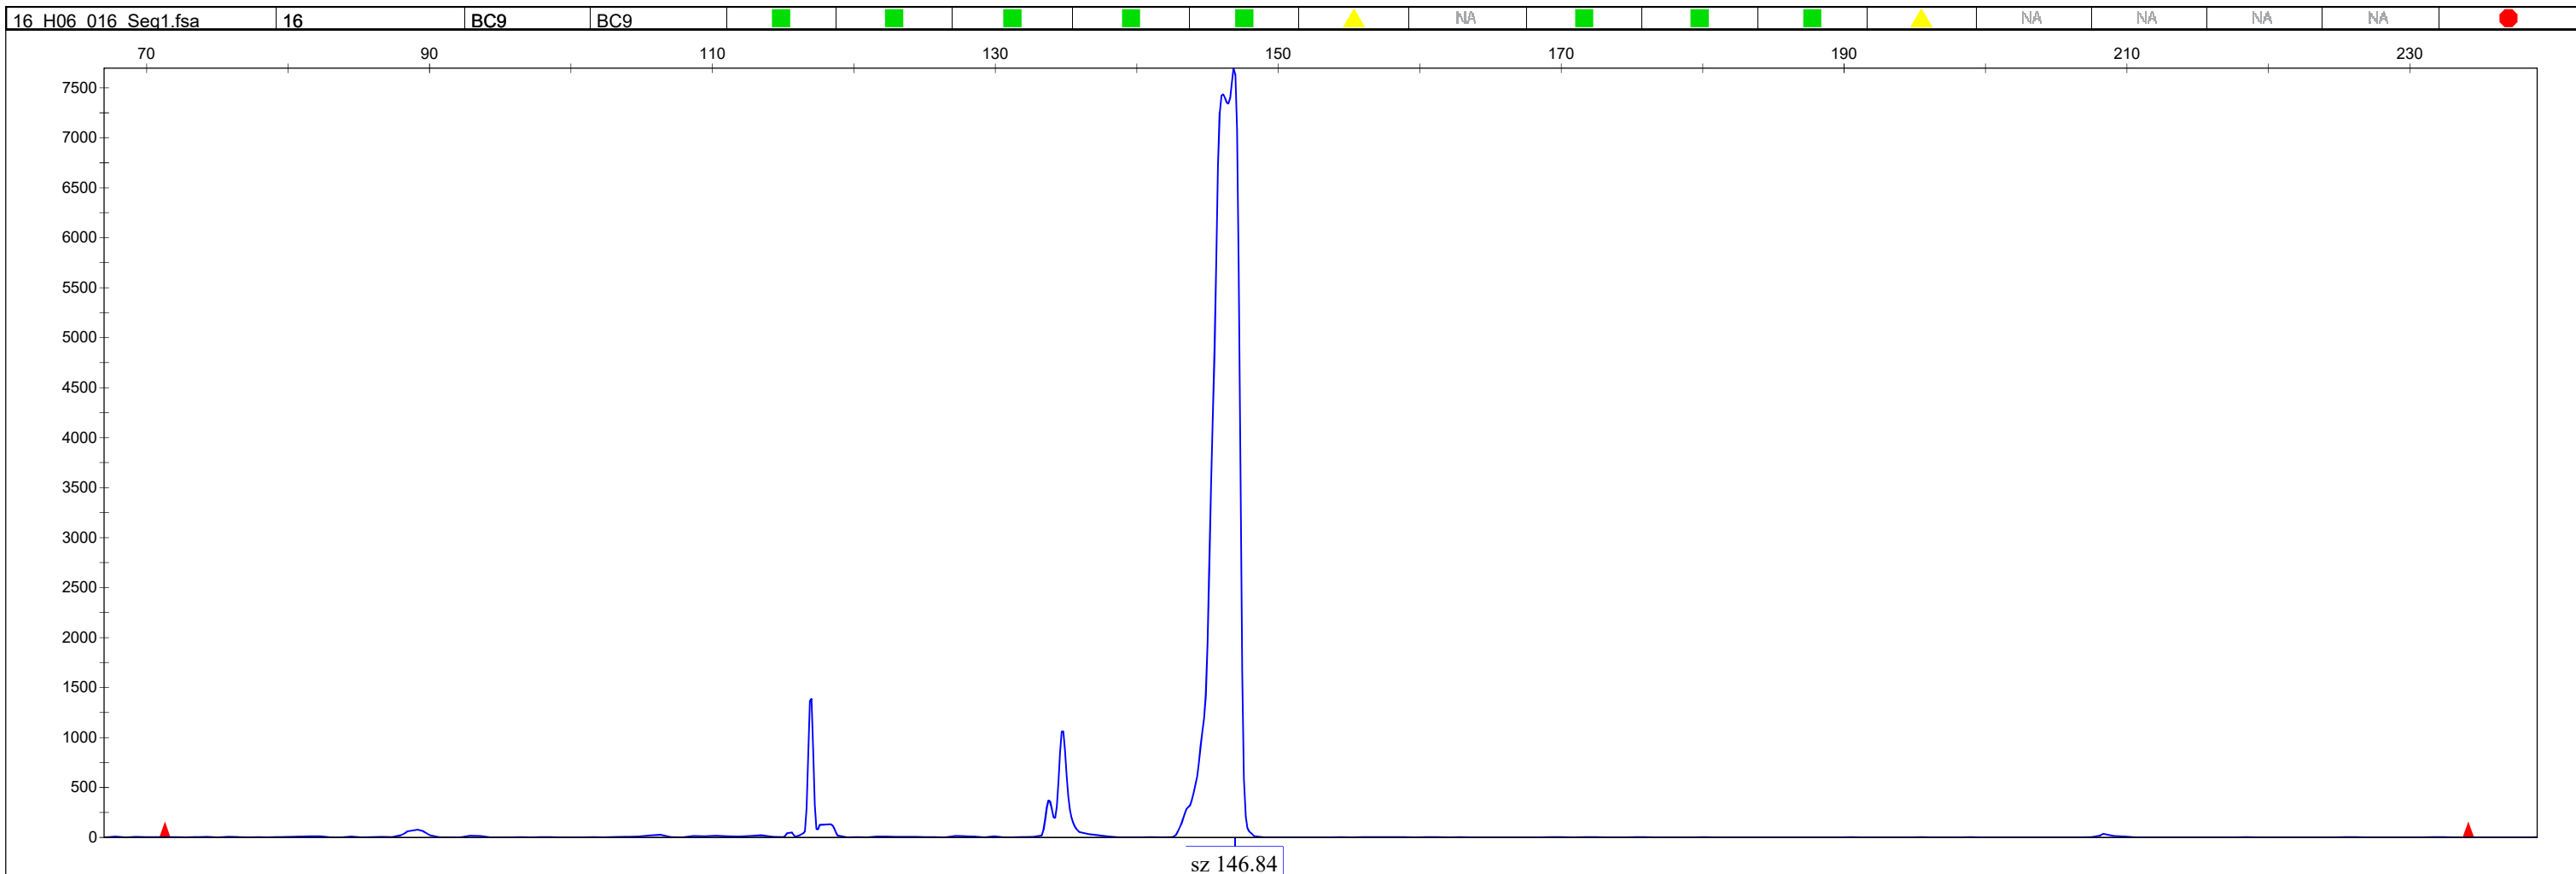

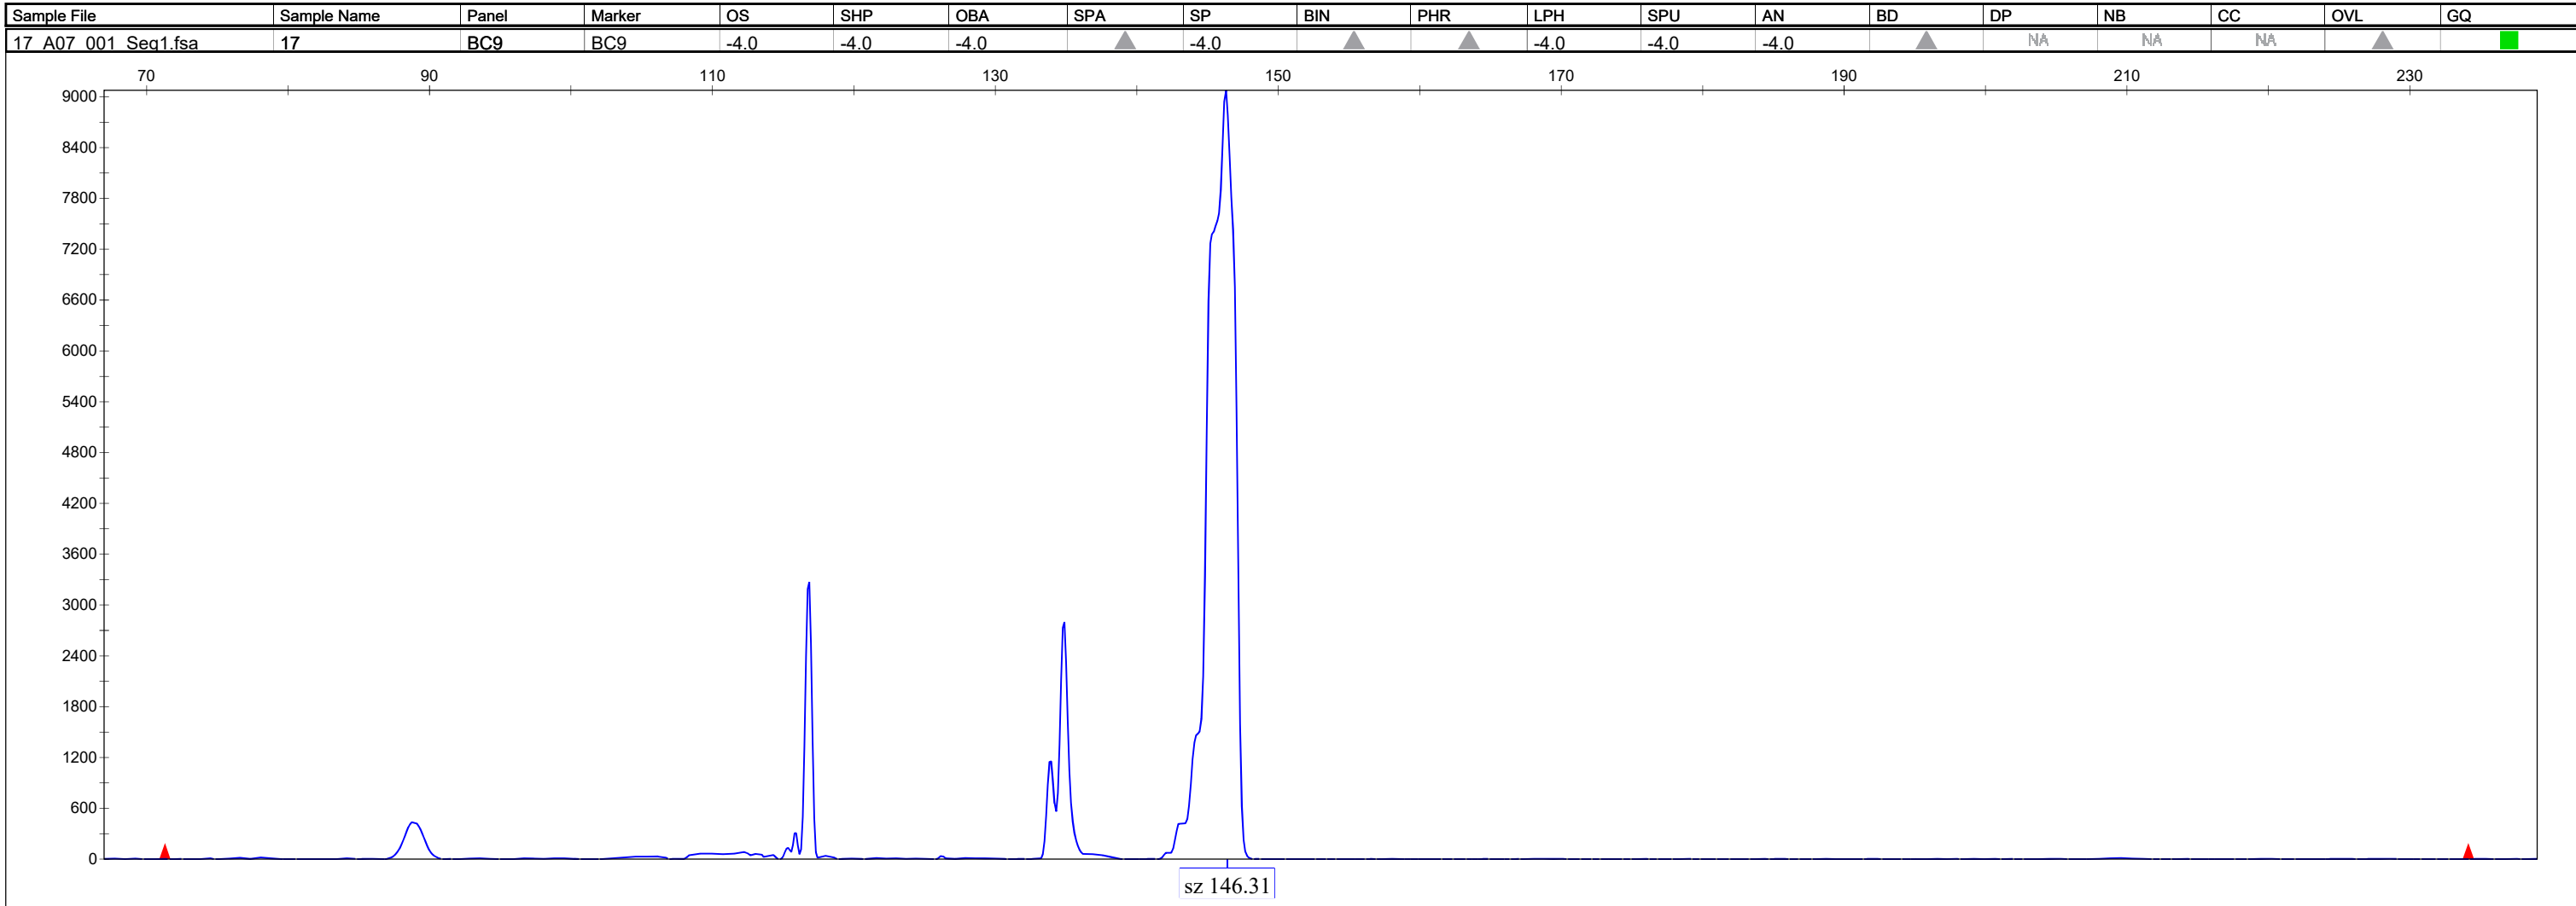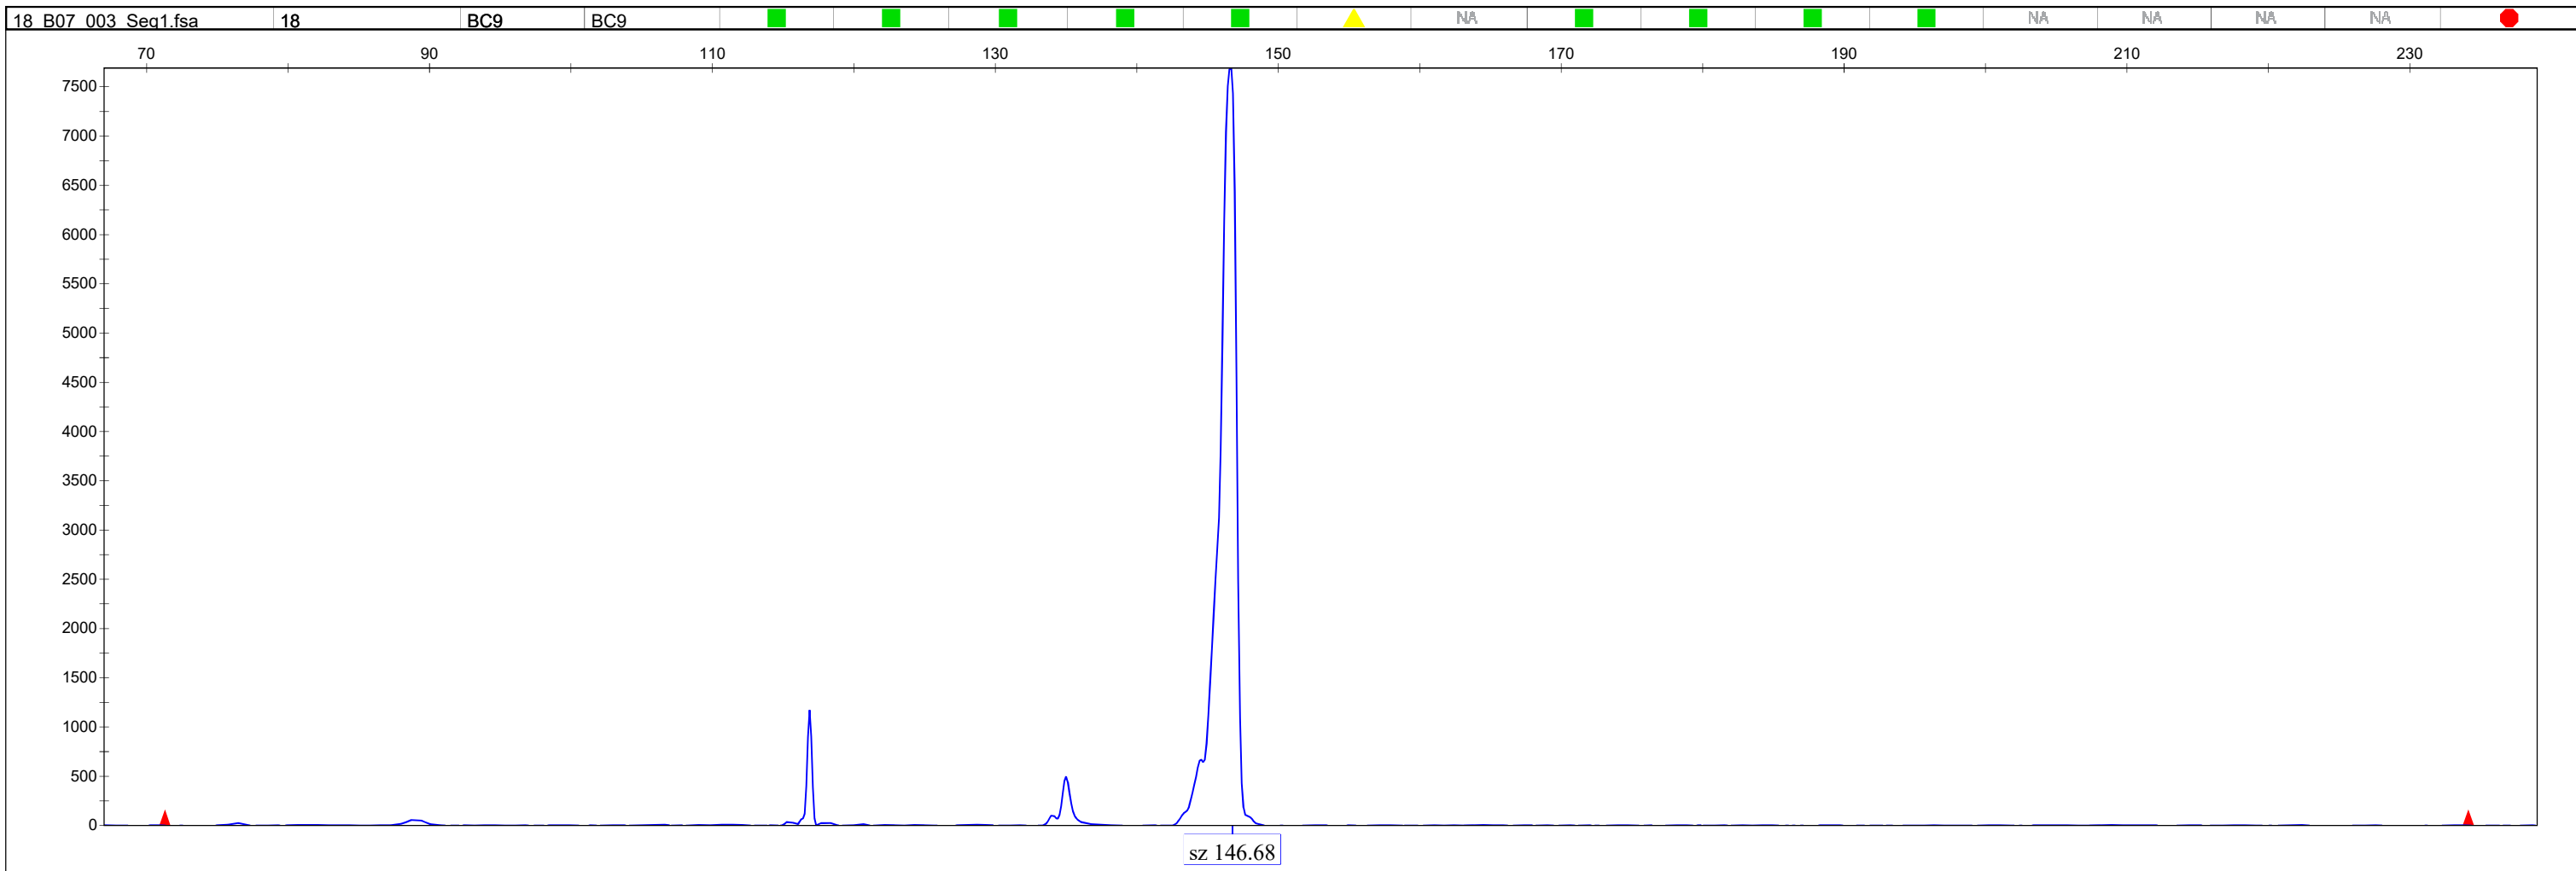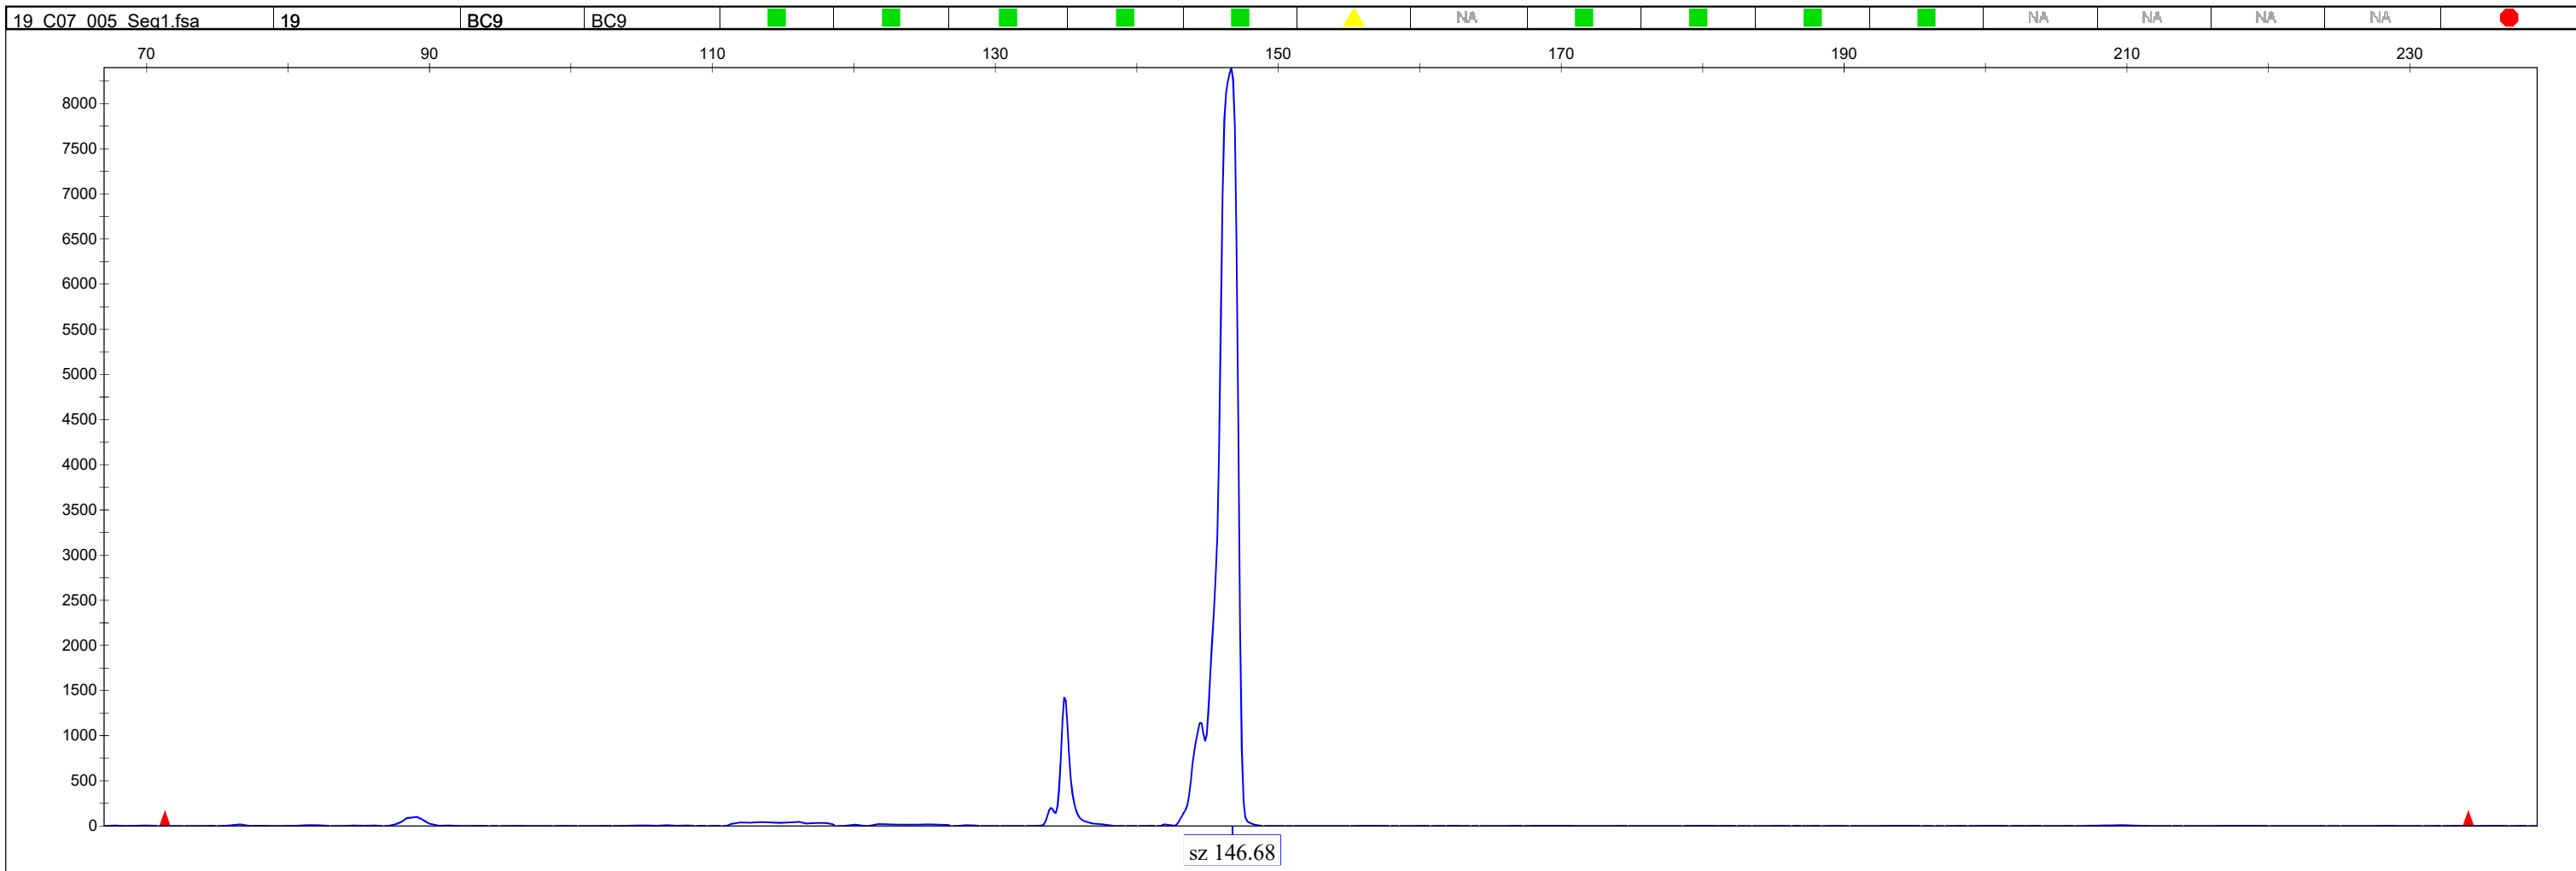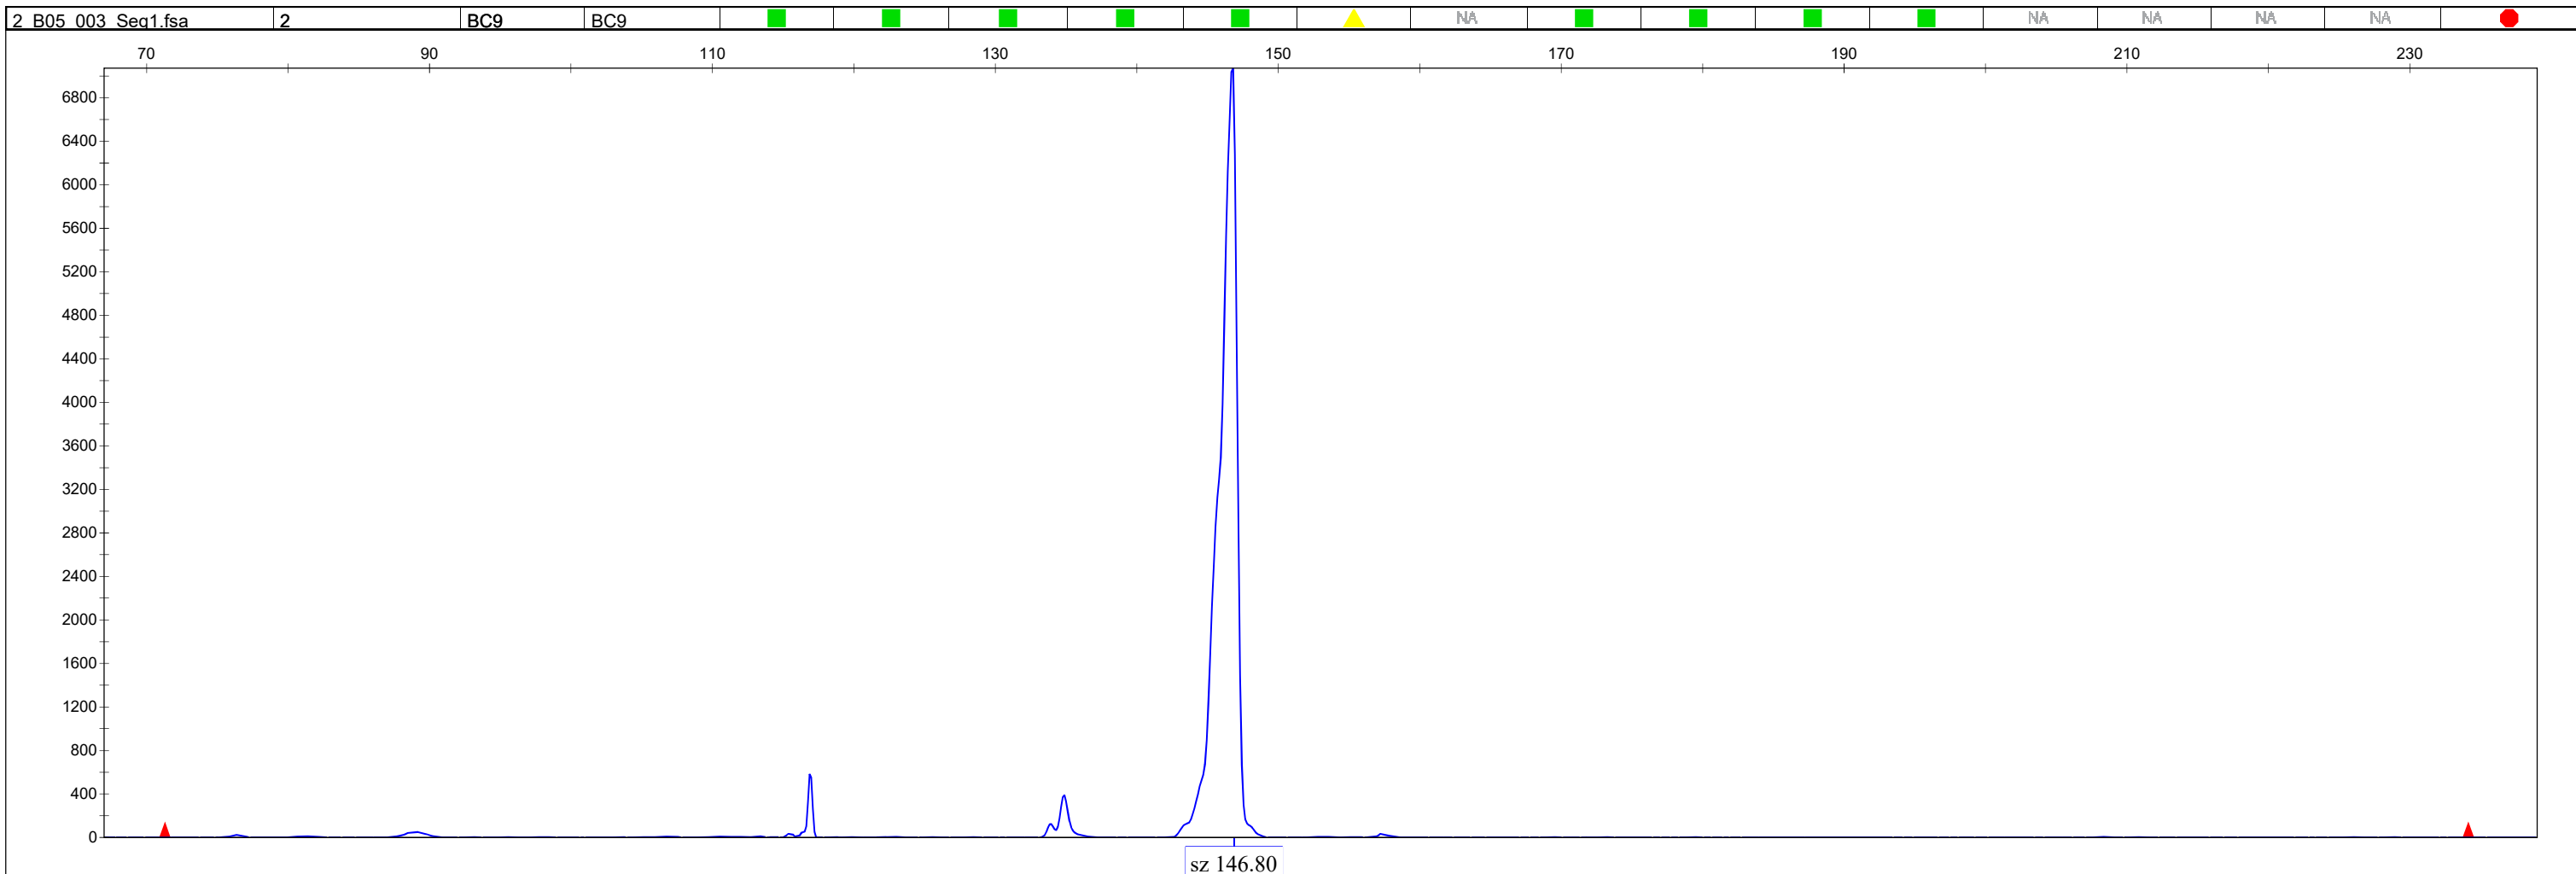

| Sample File         | Sample Name | Panel | Marker | OS | SHP | OBA | SPA | SP | BIN | PHR | LPH | SPU | AN | BD | DP | NB | CC | OVL | GQ |
|---------------------|-------------|-------|--------|----|-----|-----|-----|----|-----|-----|-----|-----|----|----|----|----|----|-----|----|
| 20_D07_007_Seq1.fsa | 20          | BC9   | BC9    |    |     |     |     |    |     |     |     |     |    |    |    |    |    |     |    |

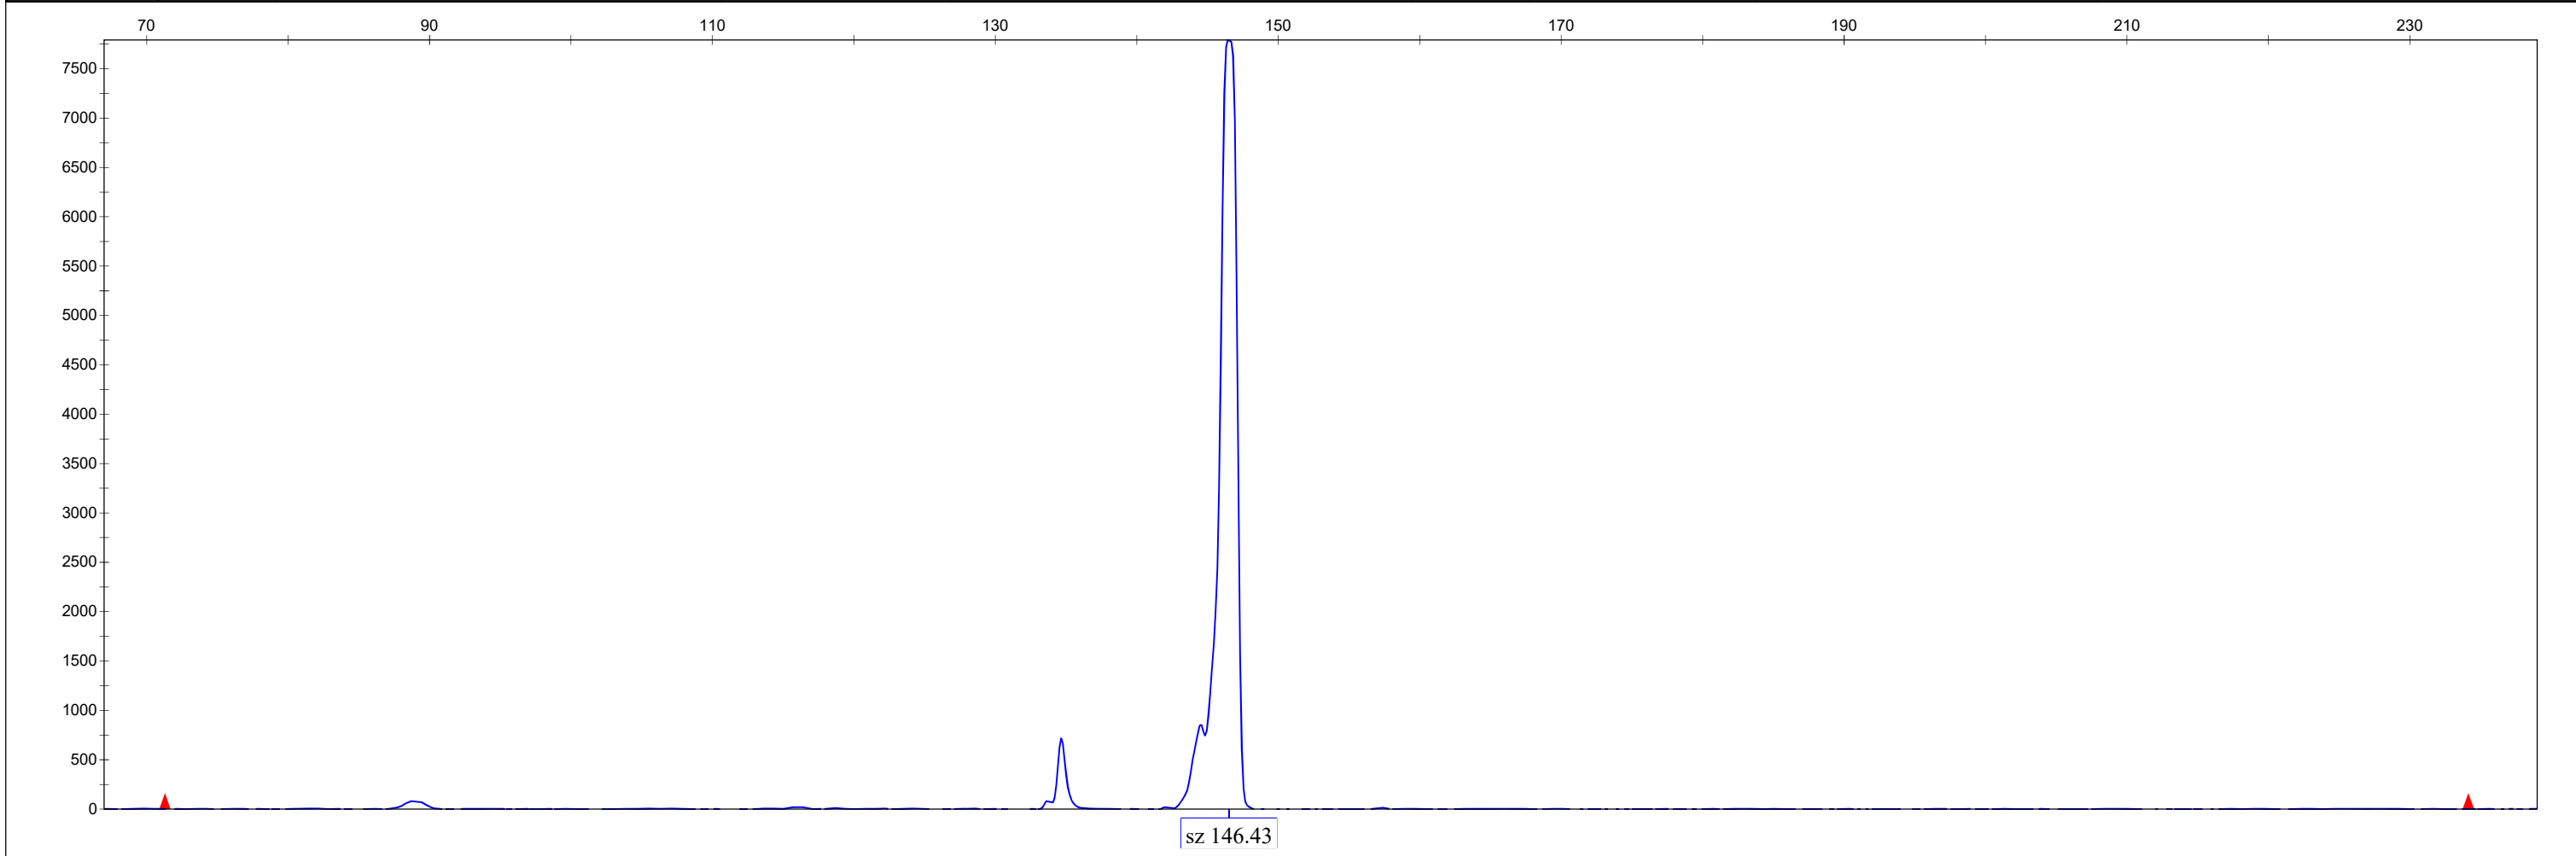

|                     |    |     |     |  |  |  |  |  |  |  |  |  |  |  |  |  |  |  |  |
|---------------------|----|-----|-----|--|--|--|--|--|--|--|--|--|--|--|--|--|--|--|--|
| 21_F07_009_Seq1.fsa | 21 | BC9 | BC9 |  |  |  |  |  |  |  |  |  |  |  |  |  |  |  |  |
|---------------------|----|-----|-----|--|--|--|--|--|--|--|--|--|--|--|--|--|--|--|--|

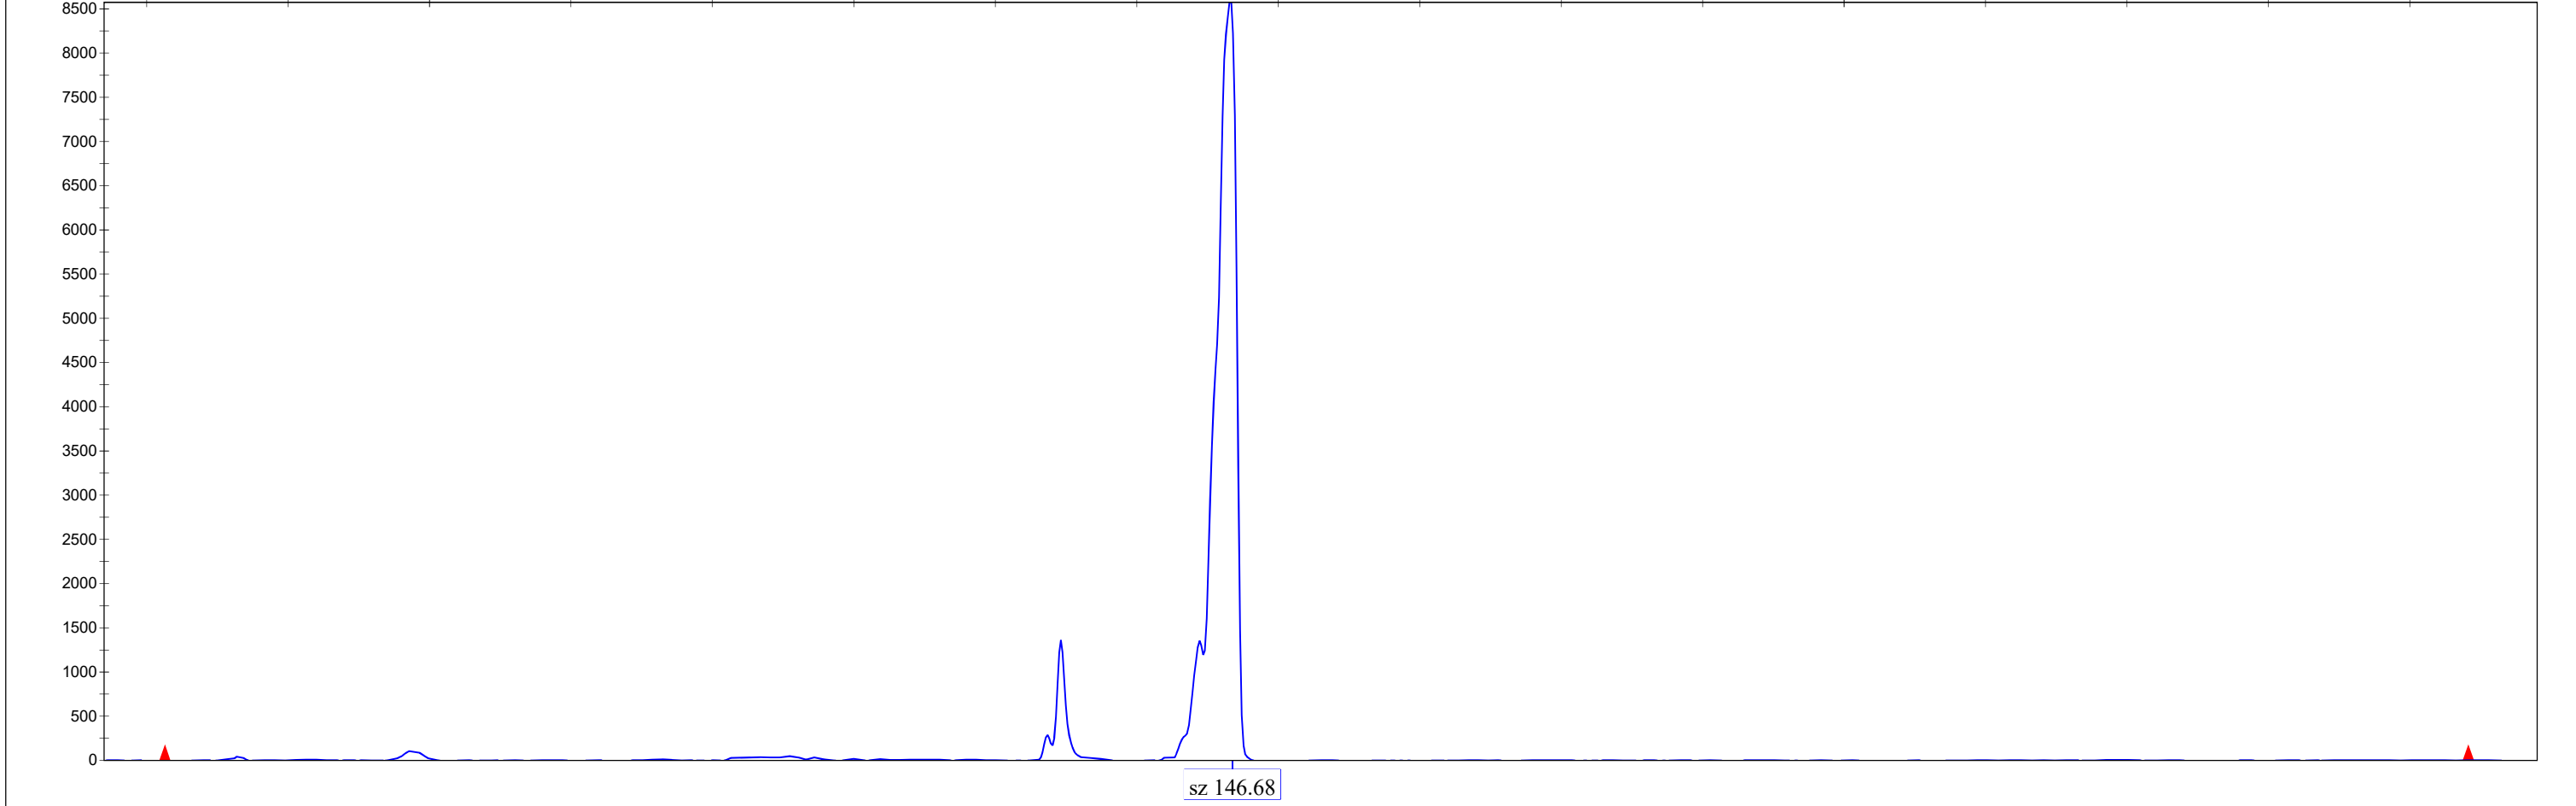

|                     |    |     |     |      |      |      |  |      |  |  |      |      |      |      |    |    |    |  |  |
|---------------------|----|-----|-----|------|------|------|--|------|--|--|------|------|------|------|----|----|----|--|--|
| 22_F07_011_Seq1.fsa | 22 | BC9 | BC9 | -4.0 | -4.0 | -4.0 |  | -4.0 |  |  | -4.0 | -4.0 | -4.0 | -4.0 | NA | NA | NA |  |  |
|---------------------|----|-----|-----|------|------|------|--|------|--|--|------|------|------|------|----|----|----|--|--|

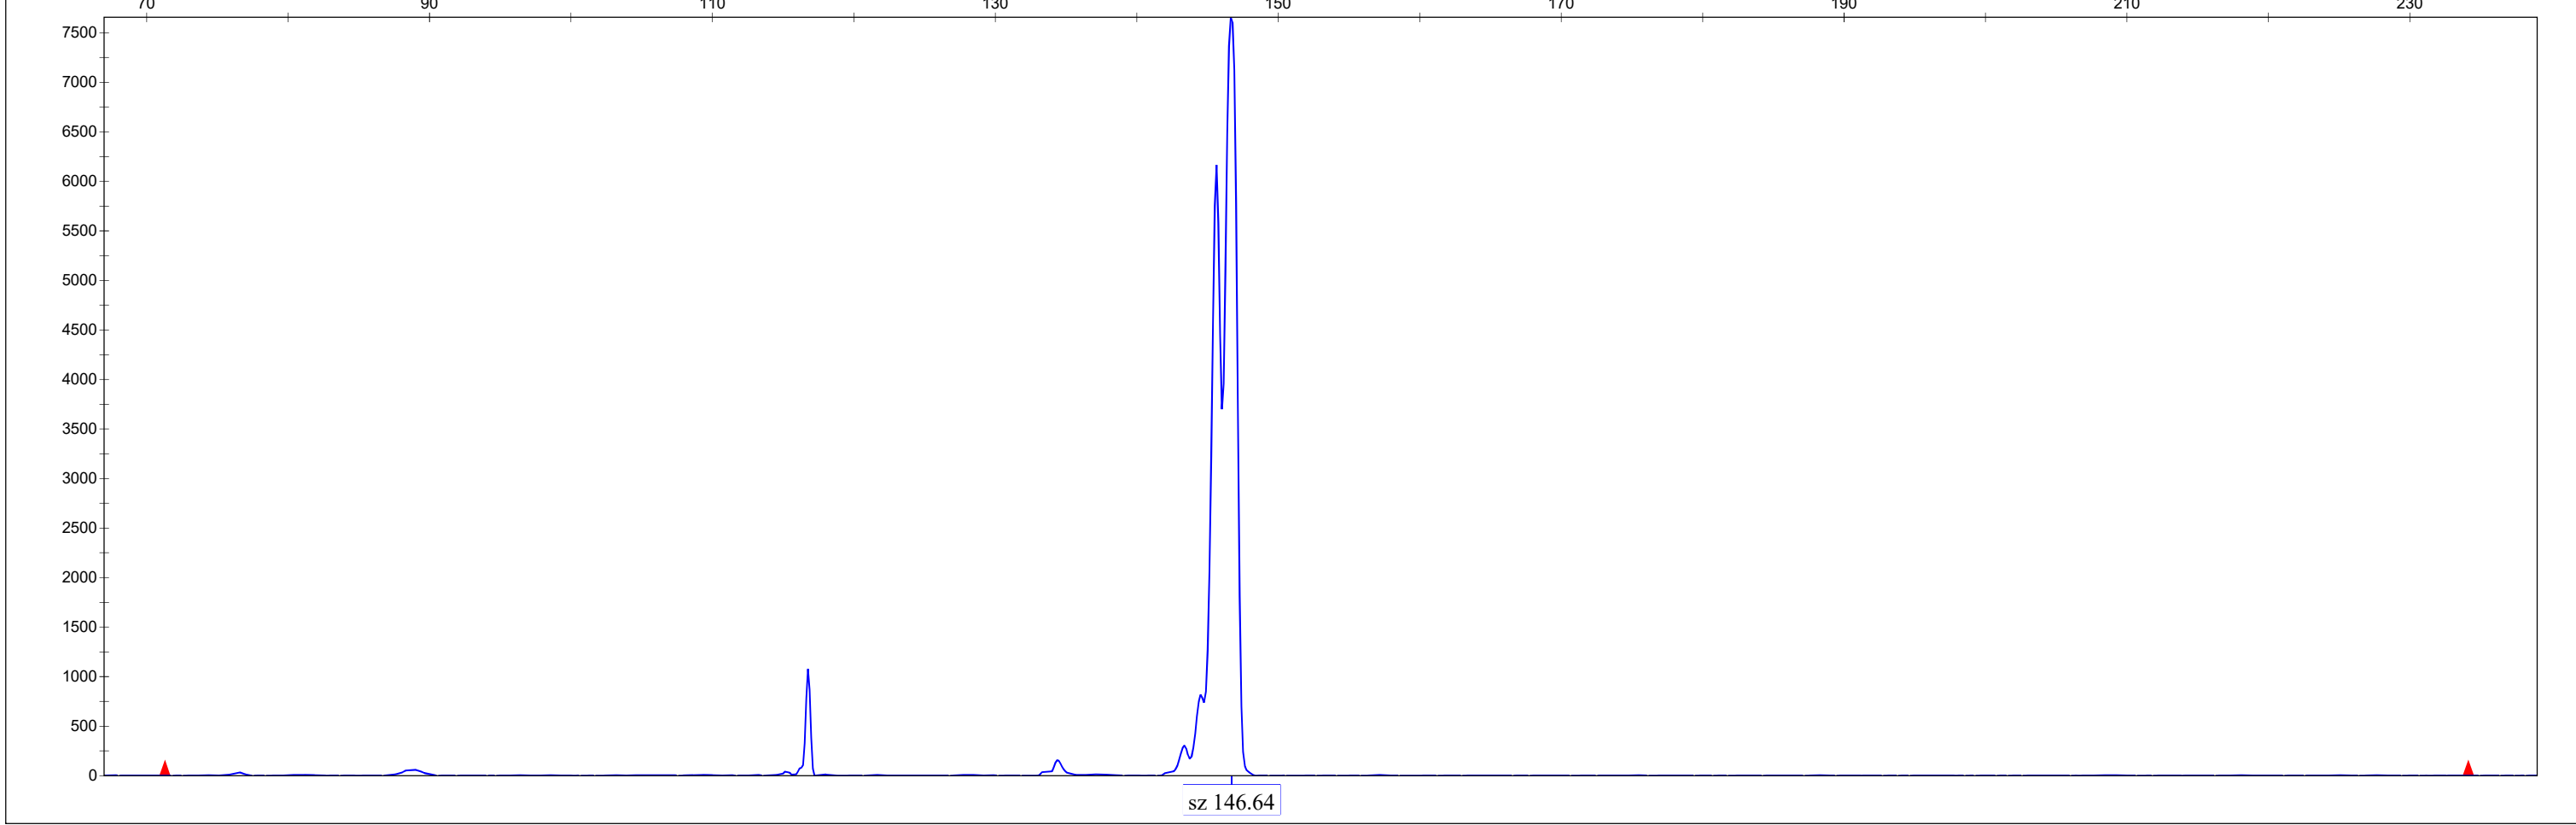

|                     |    |     |     |  |  |  |  |  |  |  |  |  |  |  |  |  |  |  |  |
|---------------------|----|-----|-----|--|--|--|--|--|--|--|--|--|--|--|--|--|--|--|--|
| 23_G07_013_Seq1.fsa | 23 | BC9 | BC9 |  |  |  |  |  |  |  |  |  |  |  |  |  |  |  |  |
|---------------------|----|-----|-----|--|--|--|--|--|--|--|--|--|--|--|--|--|--|--|--|

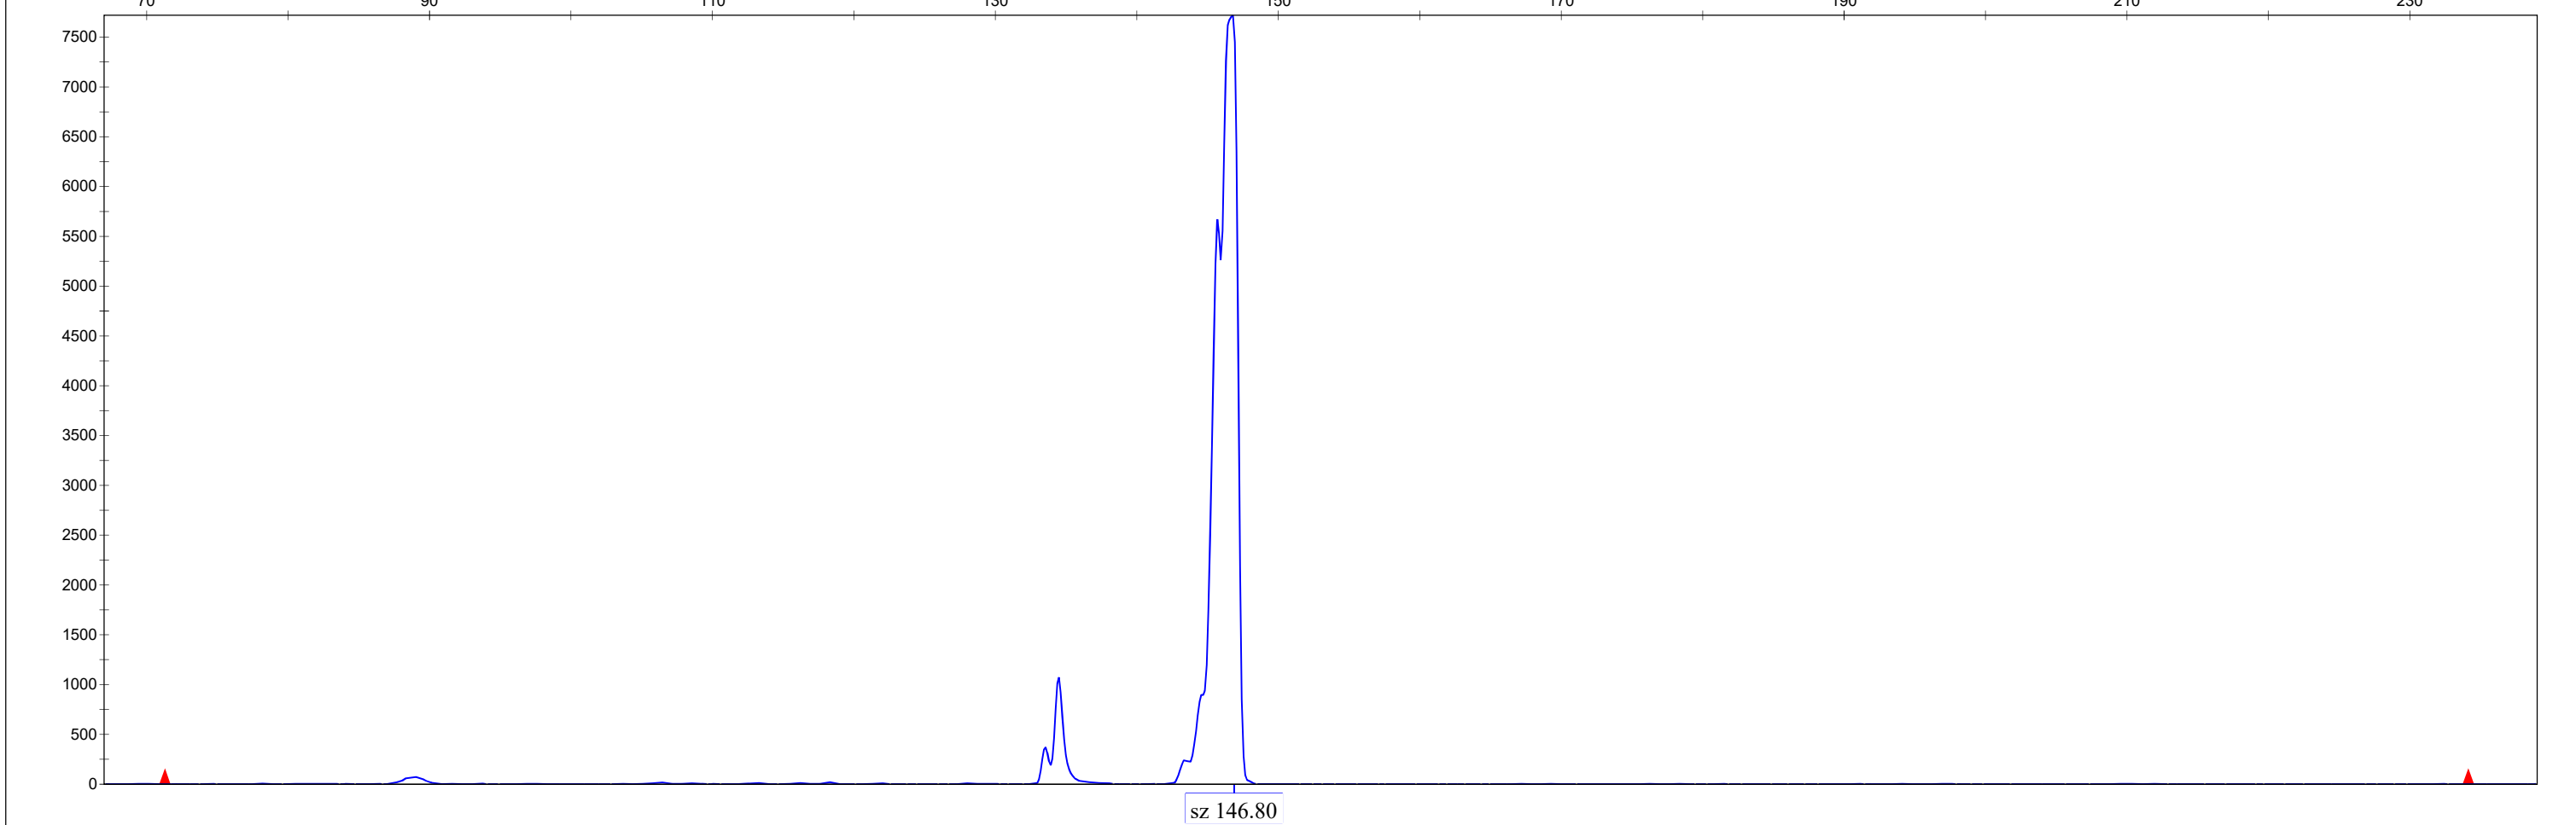

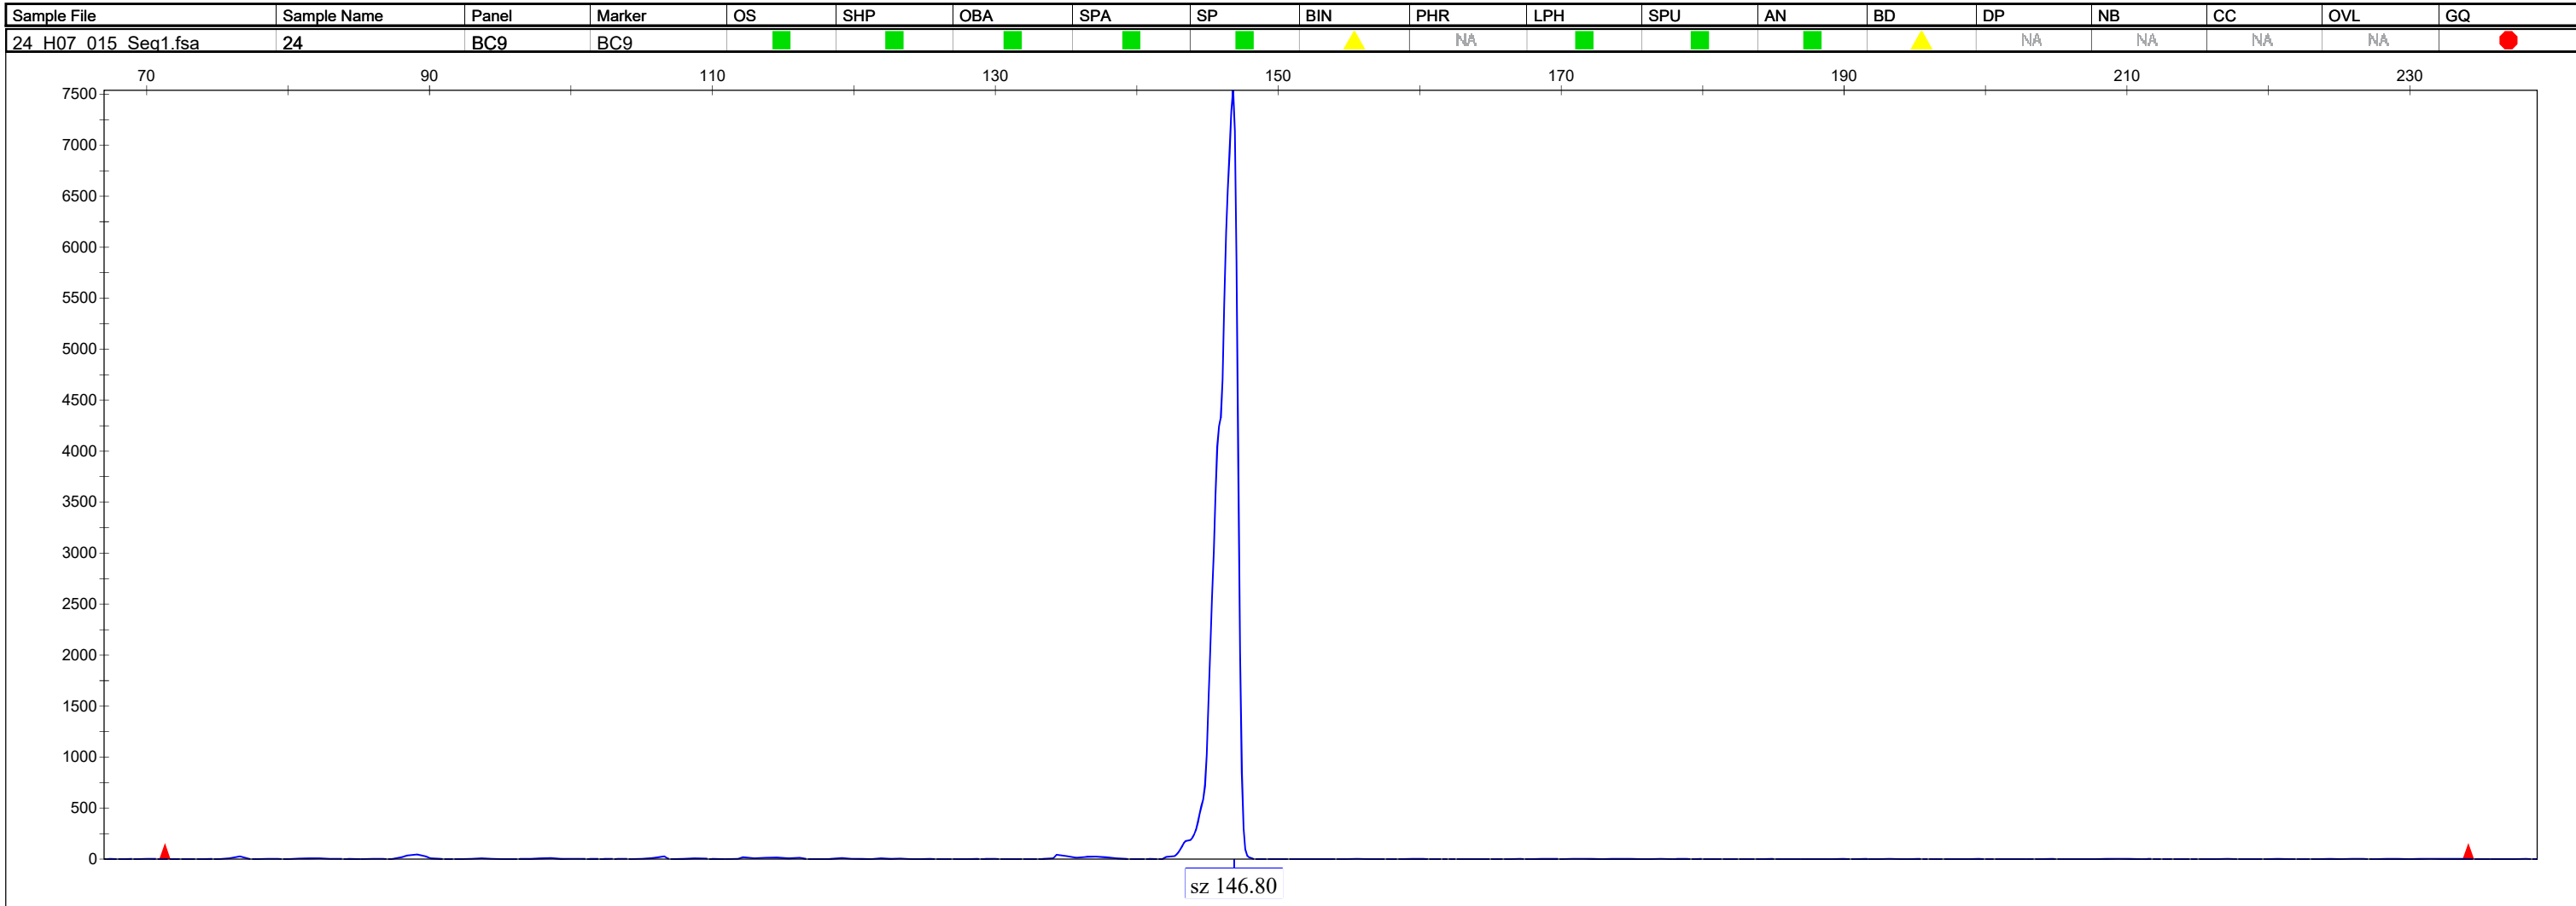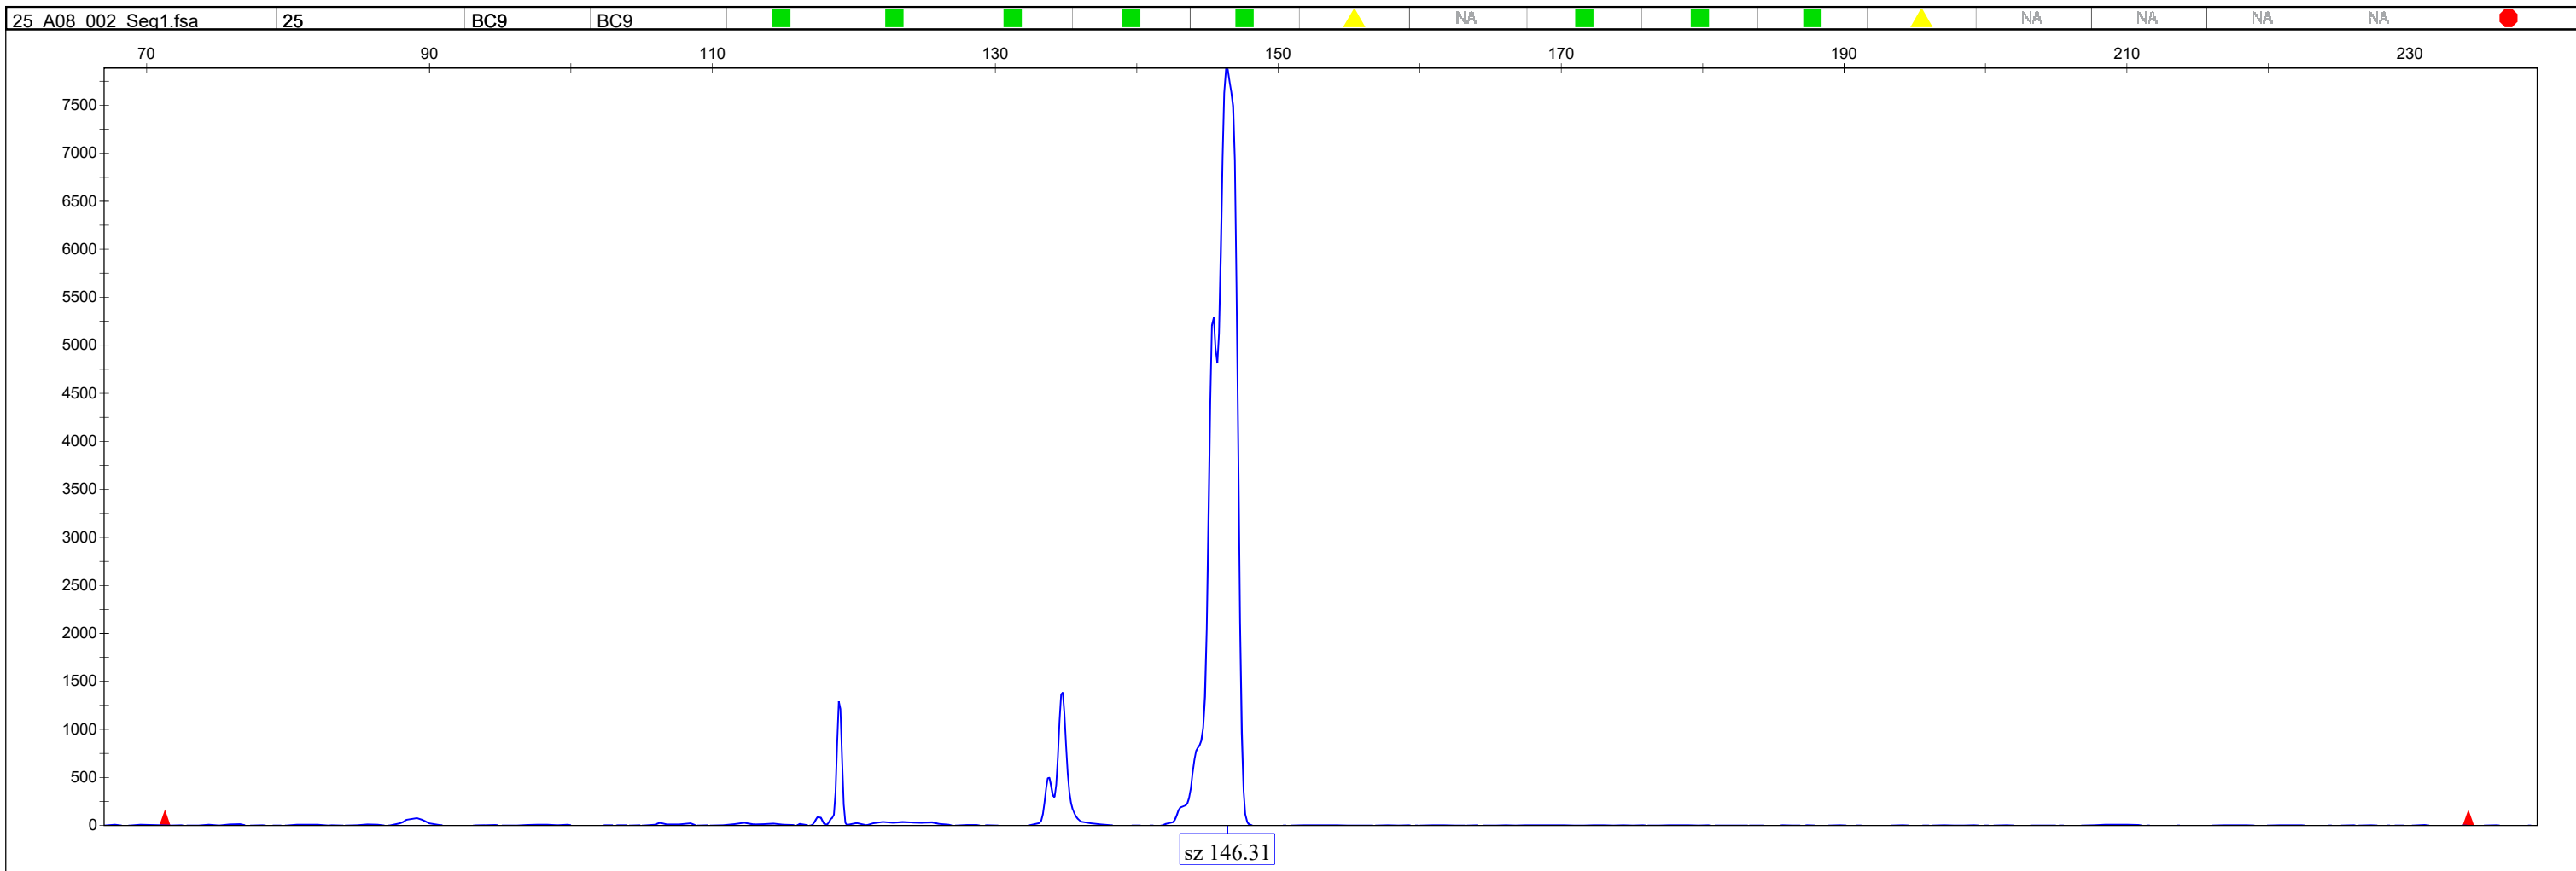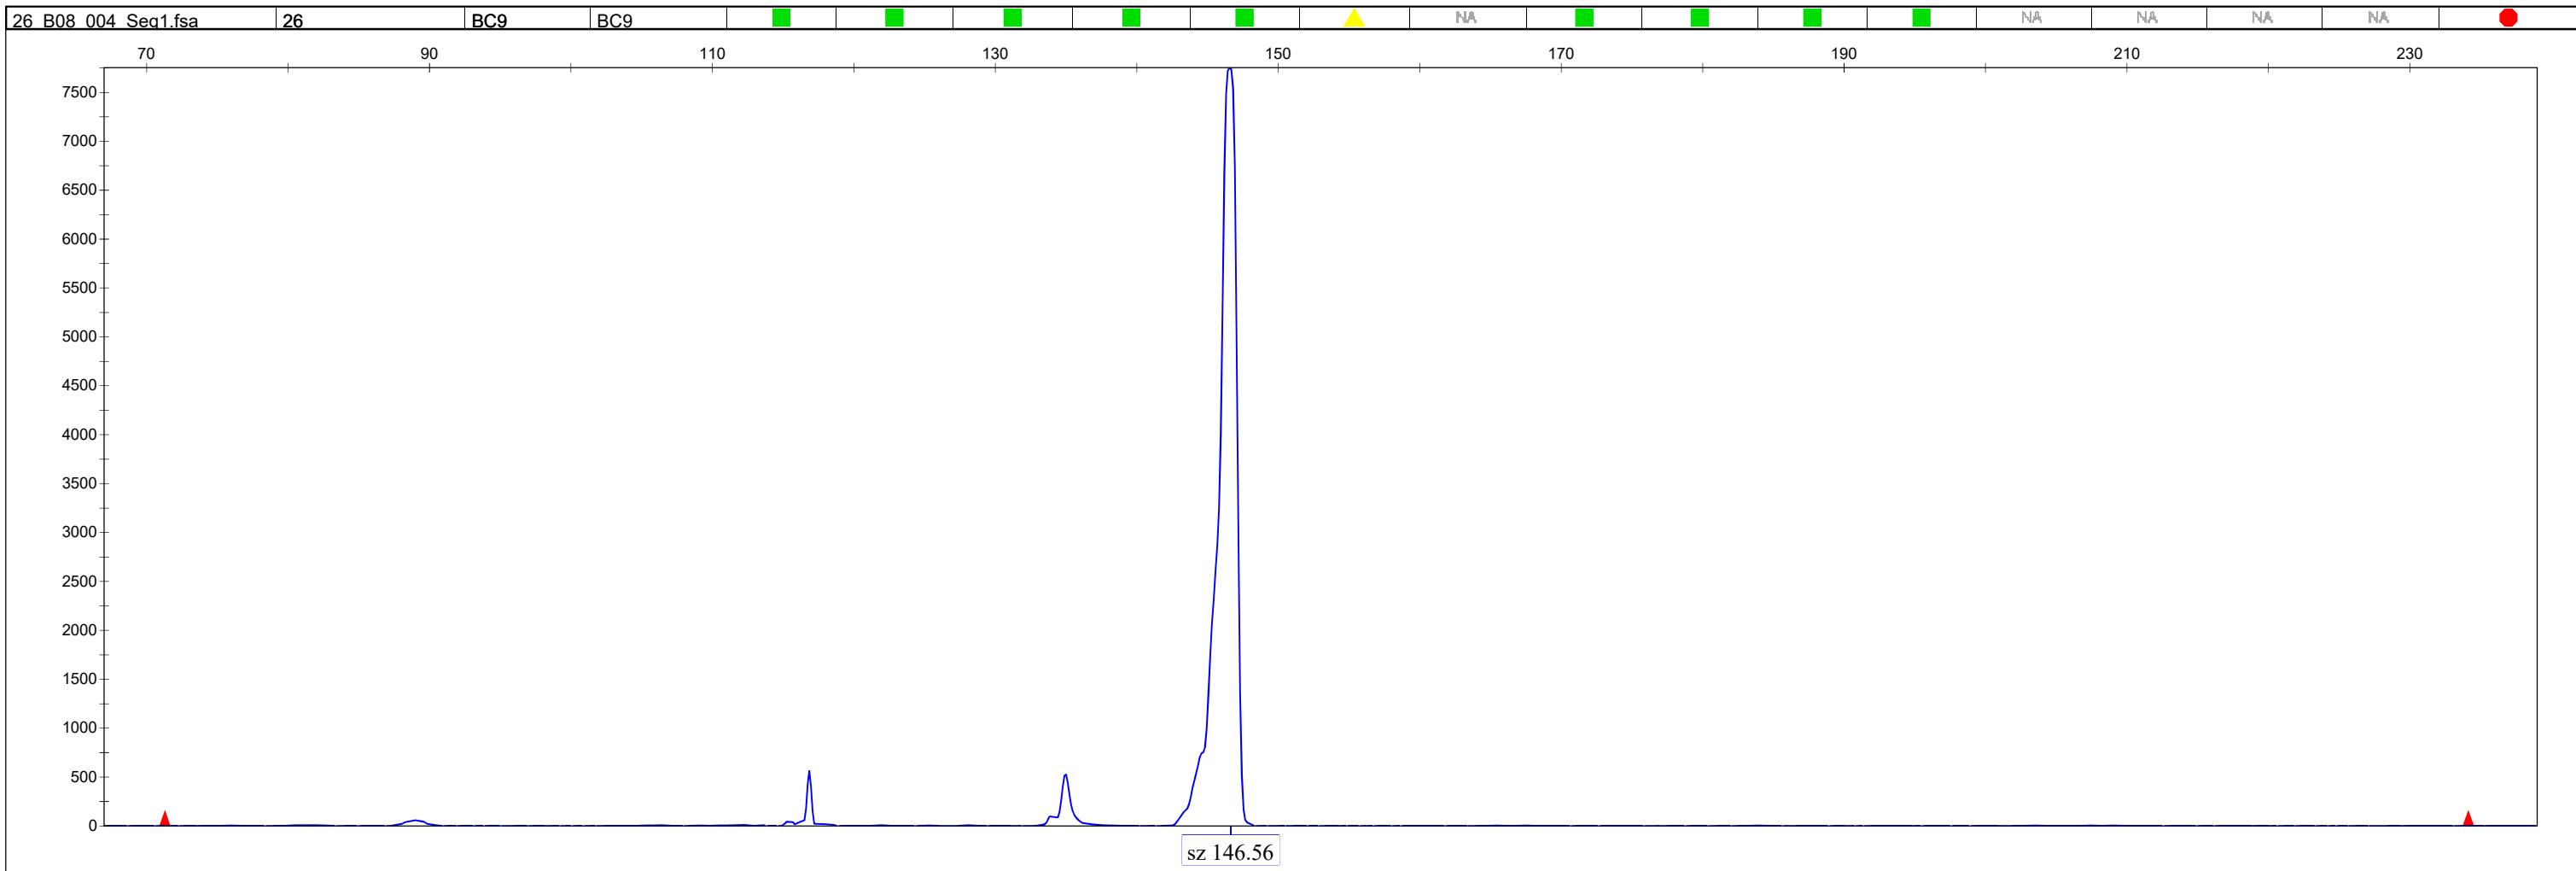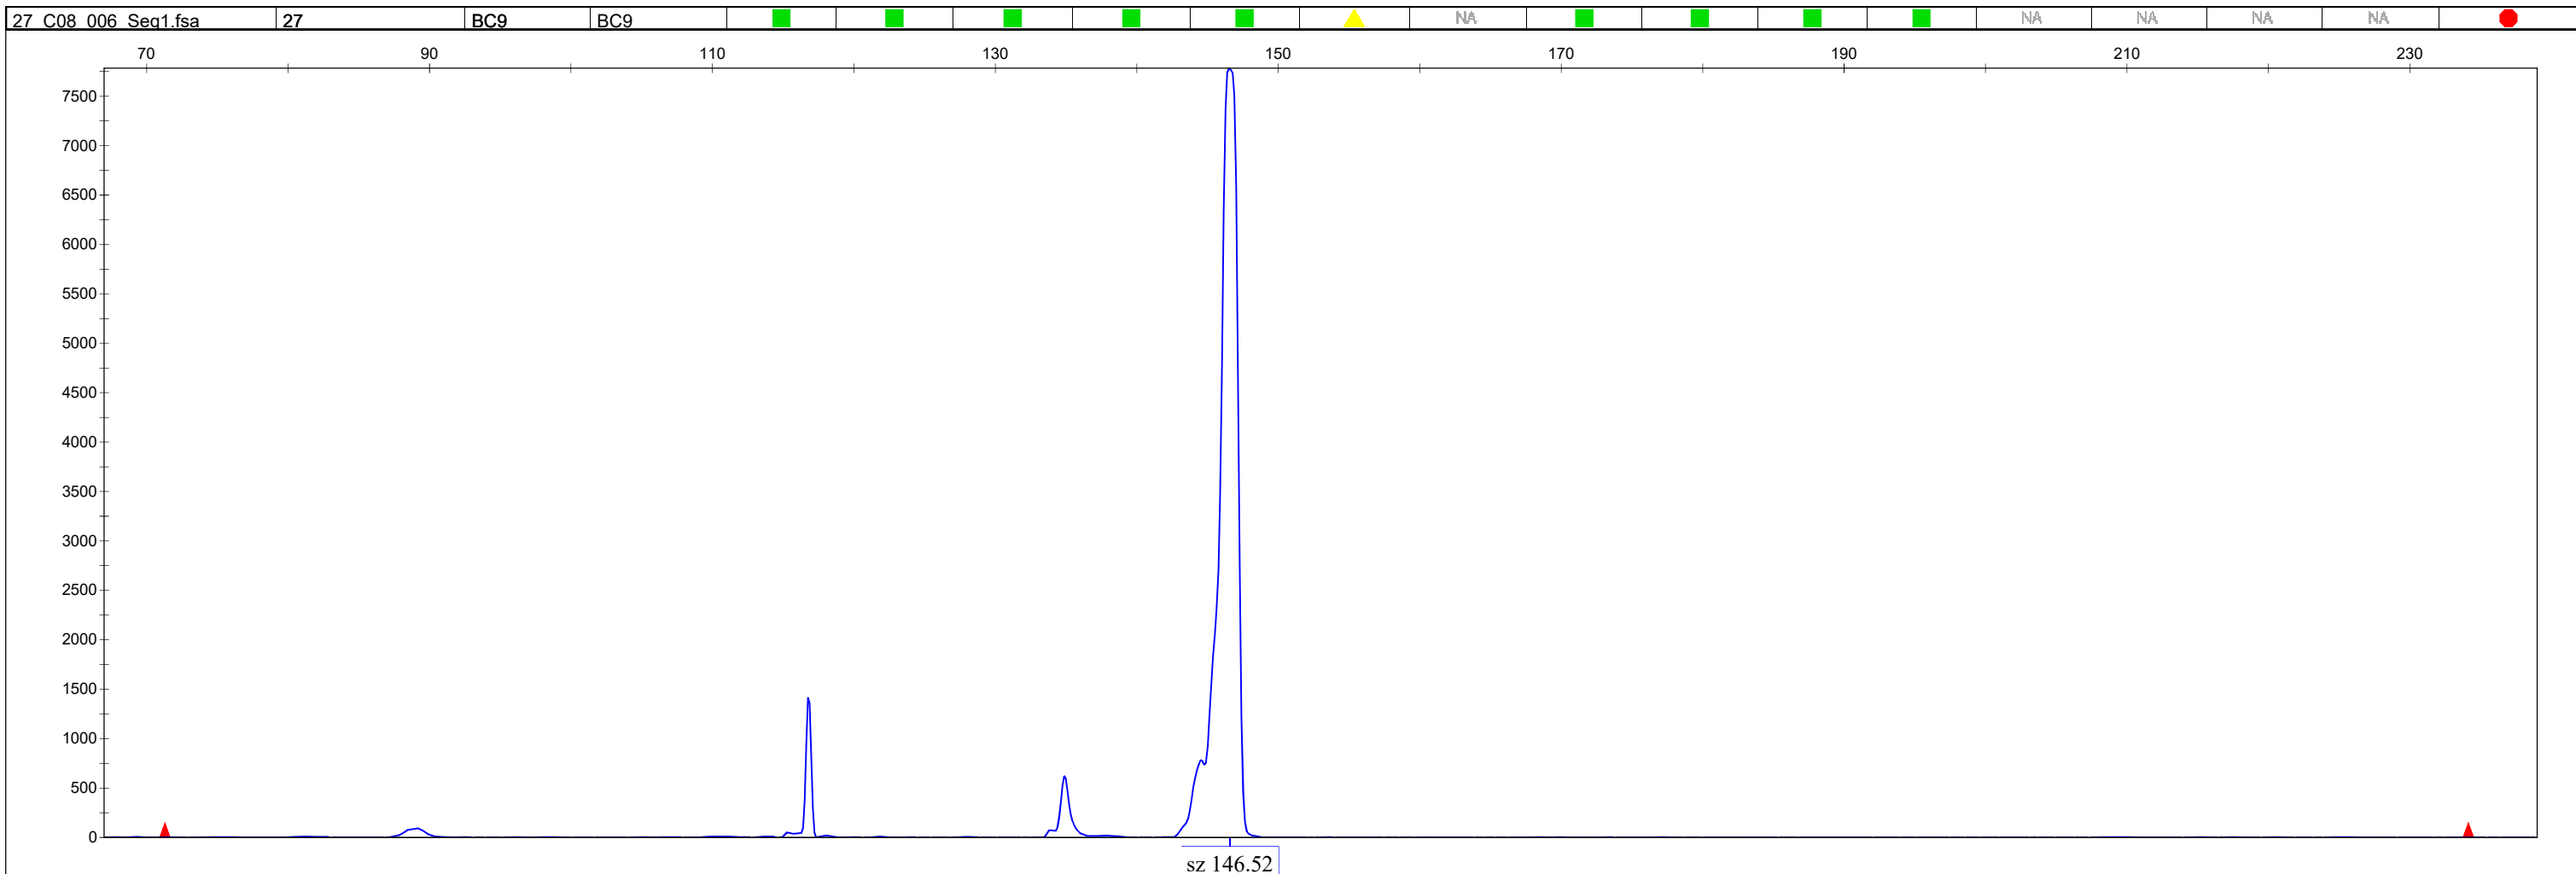

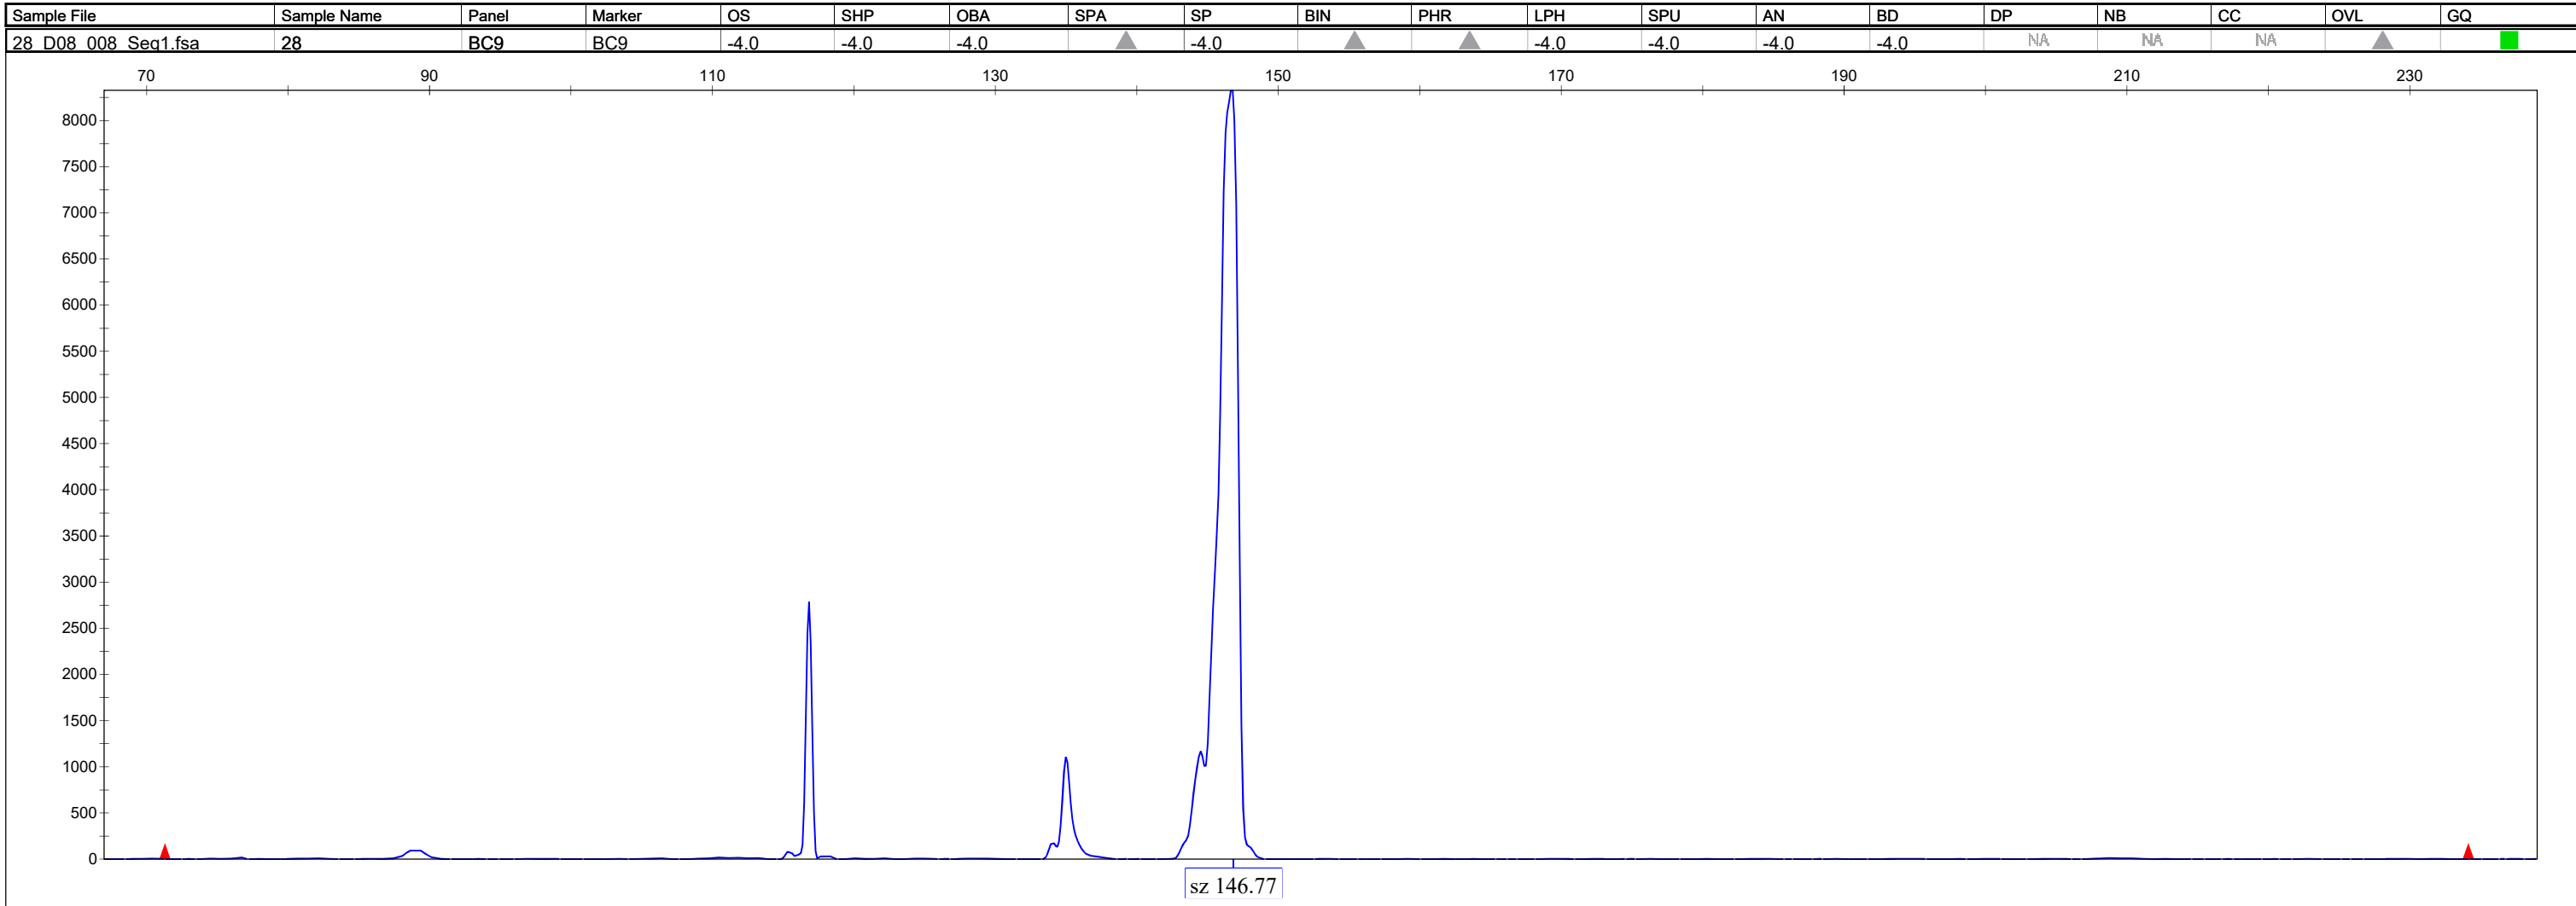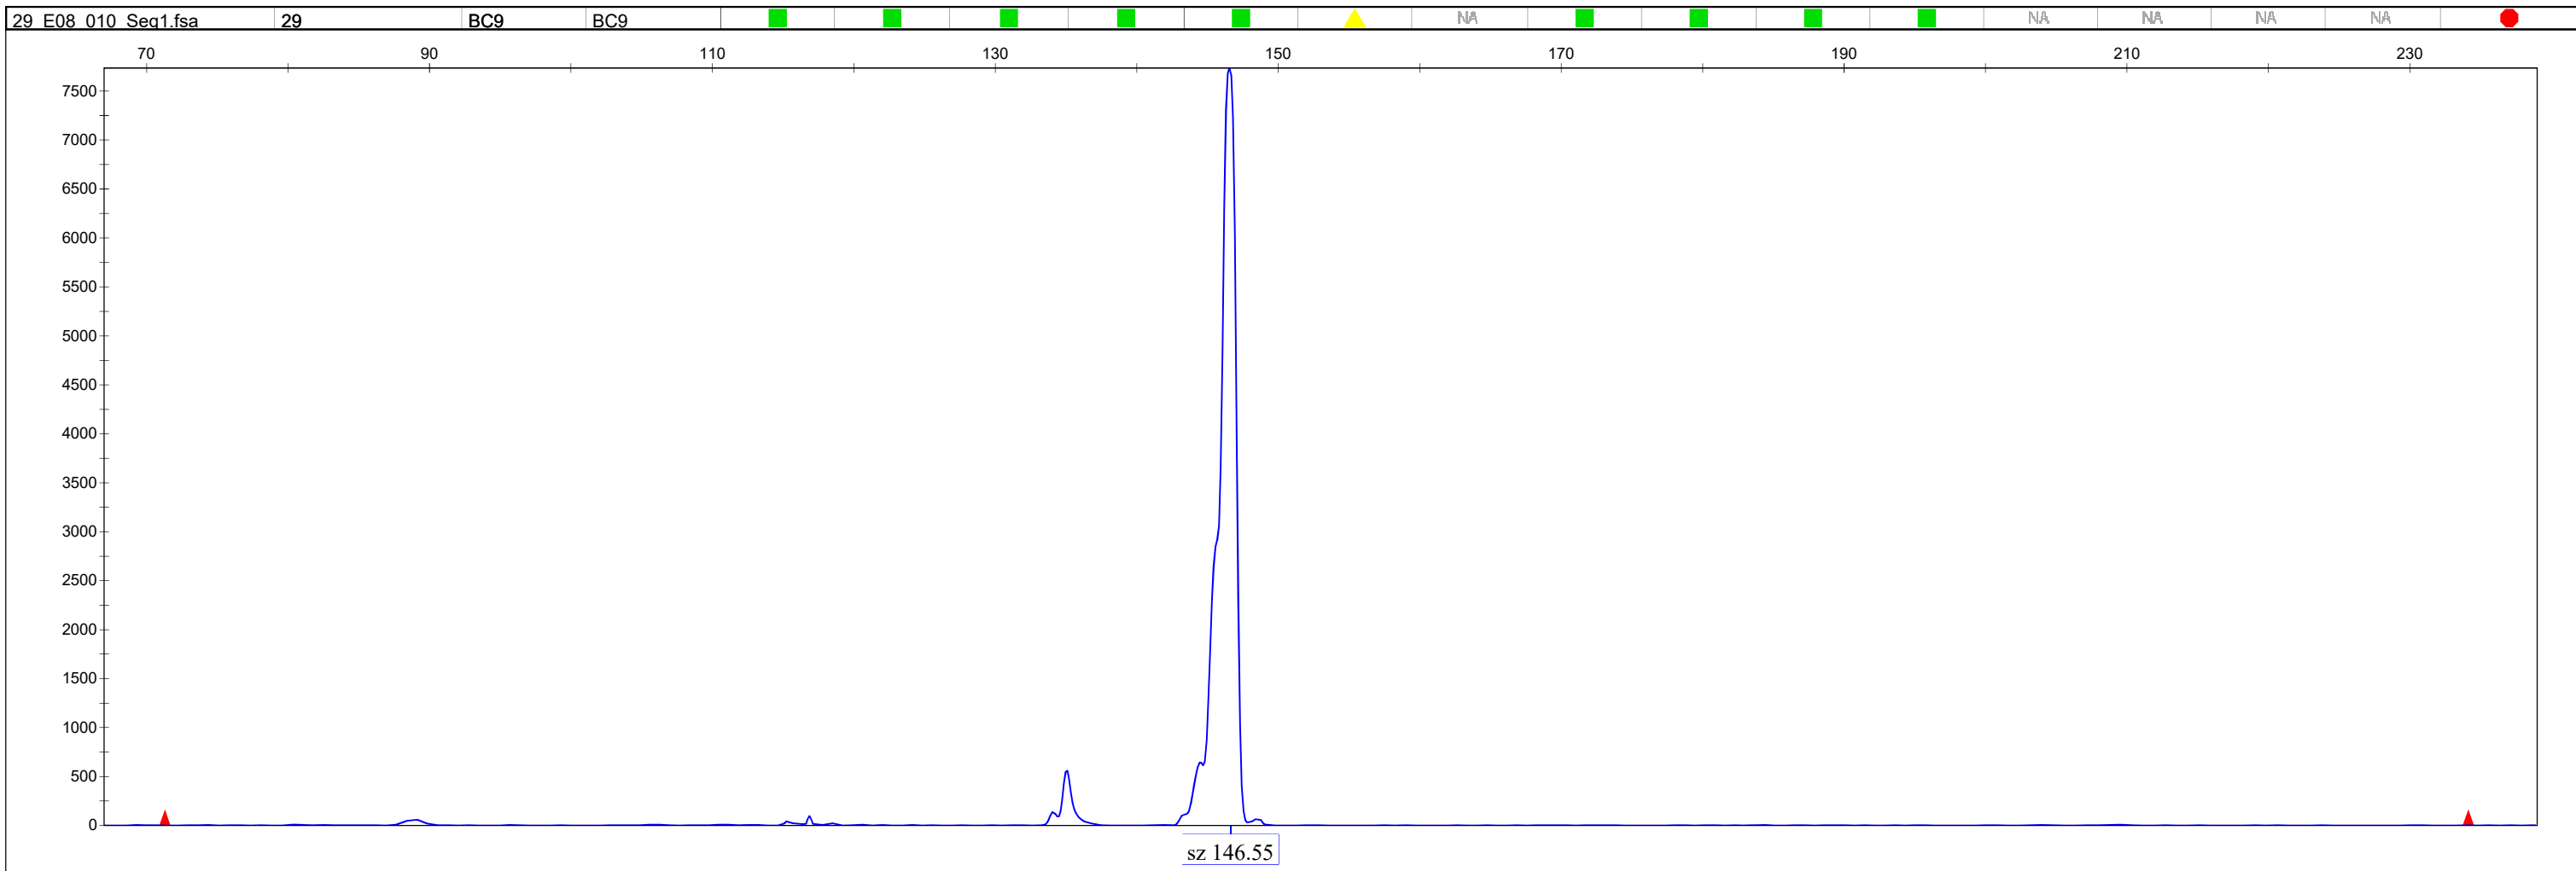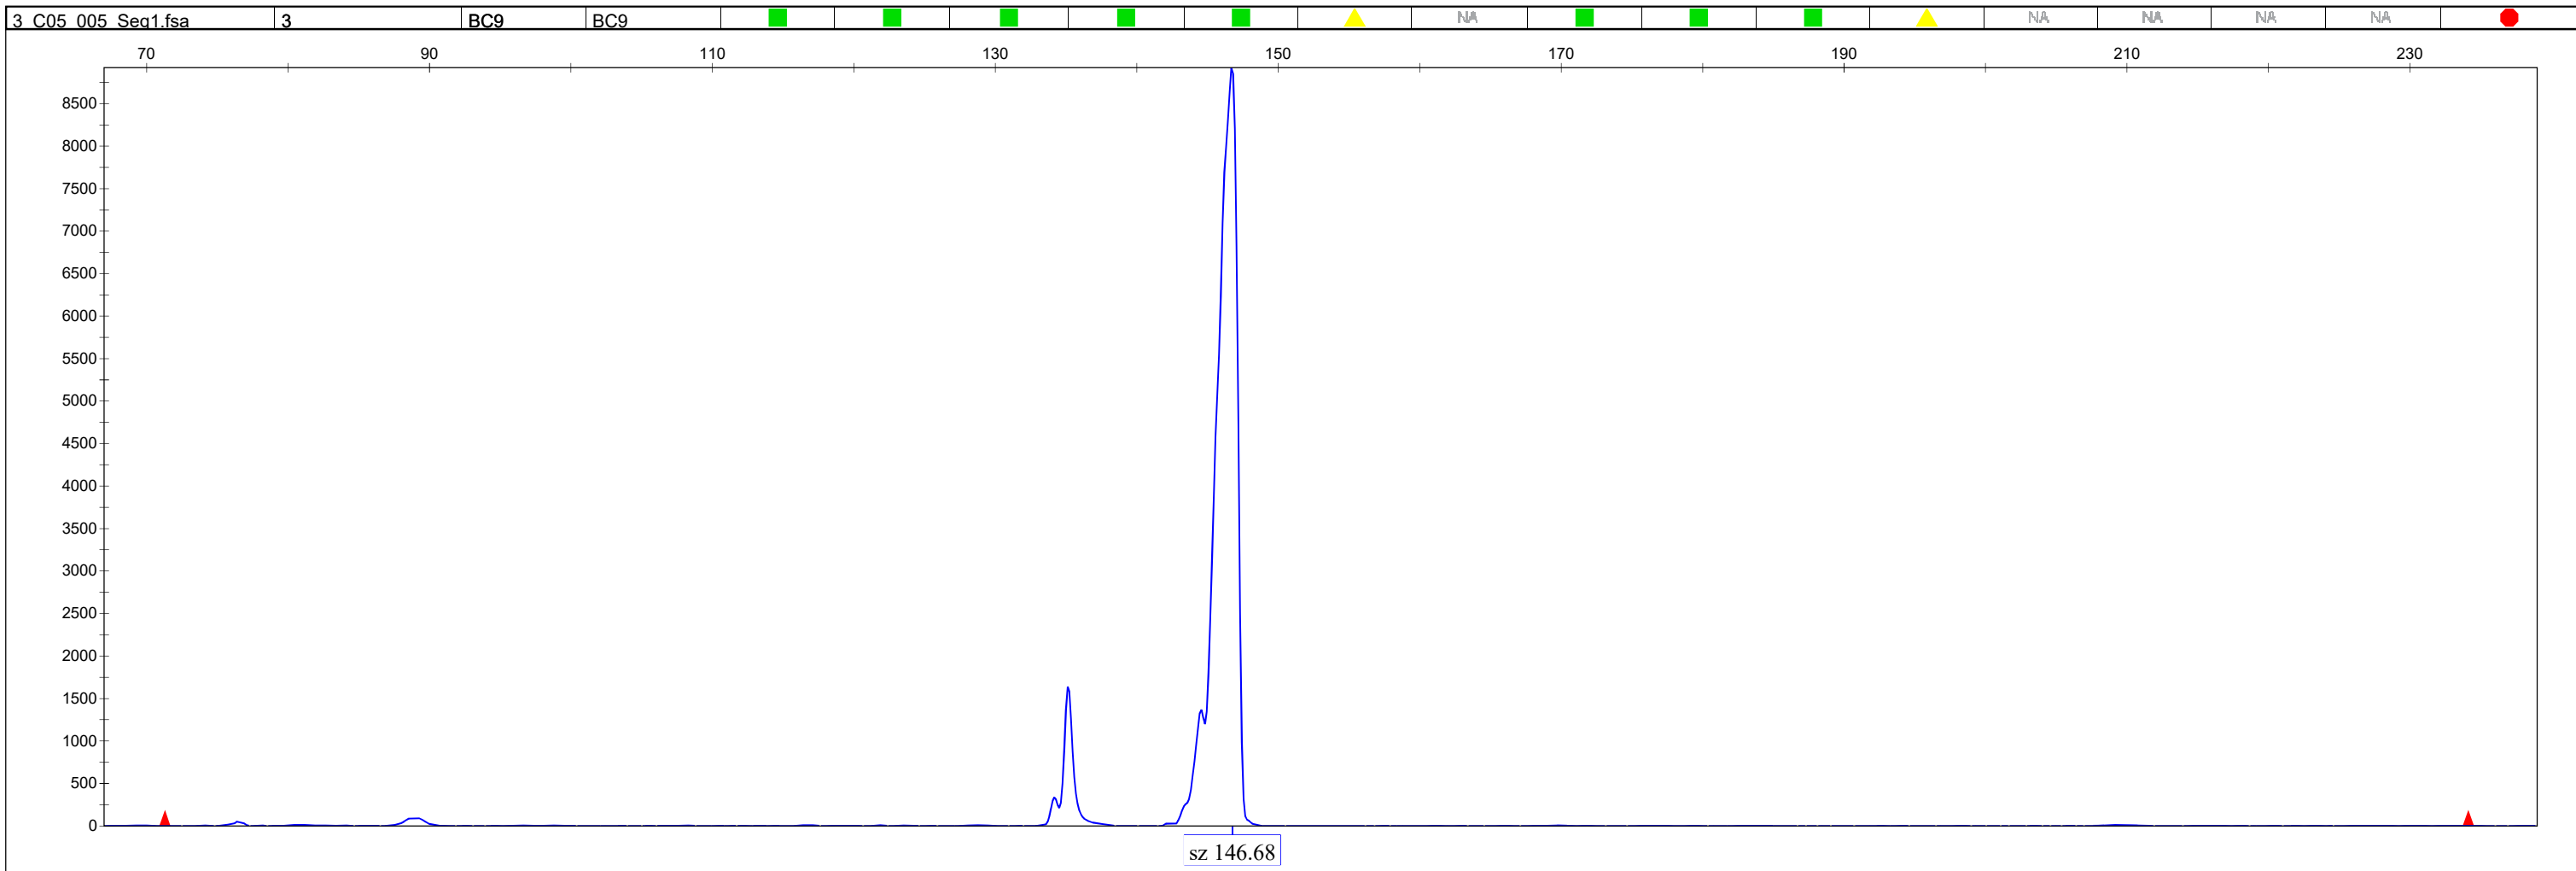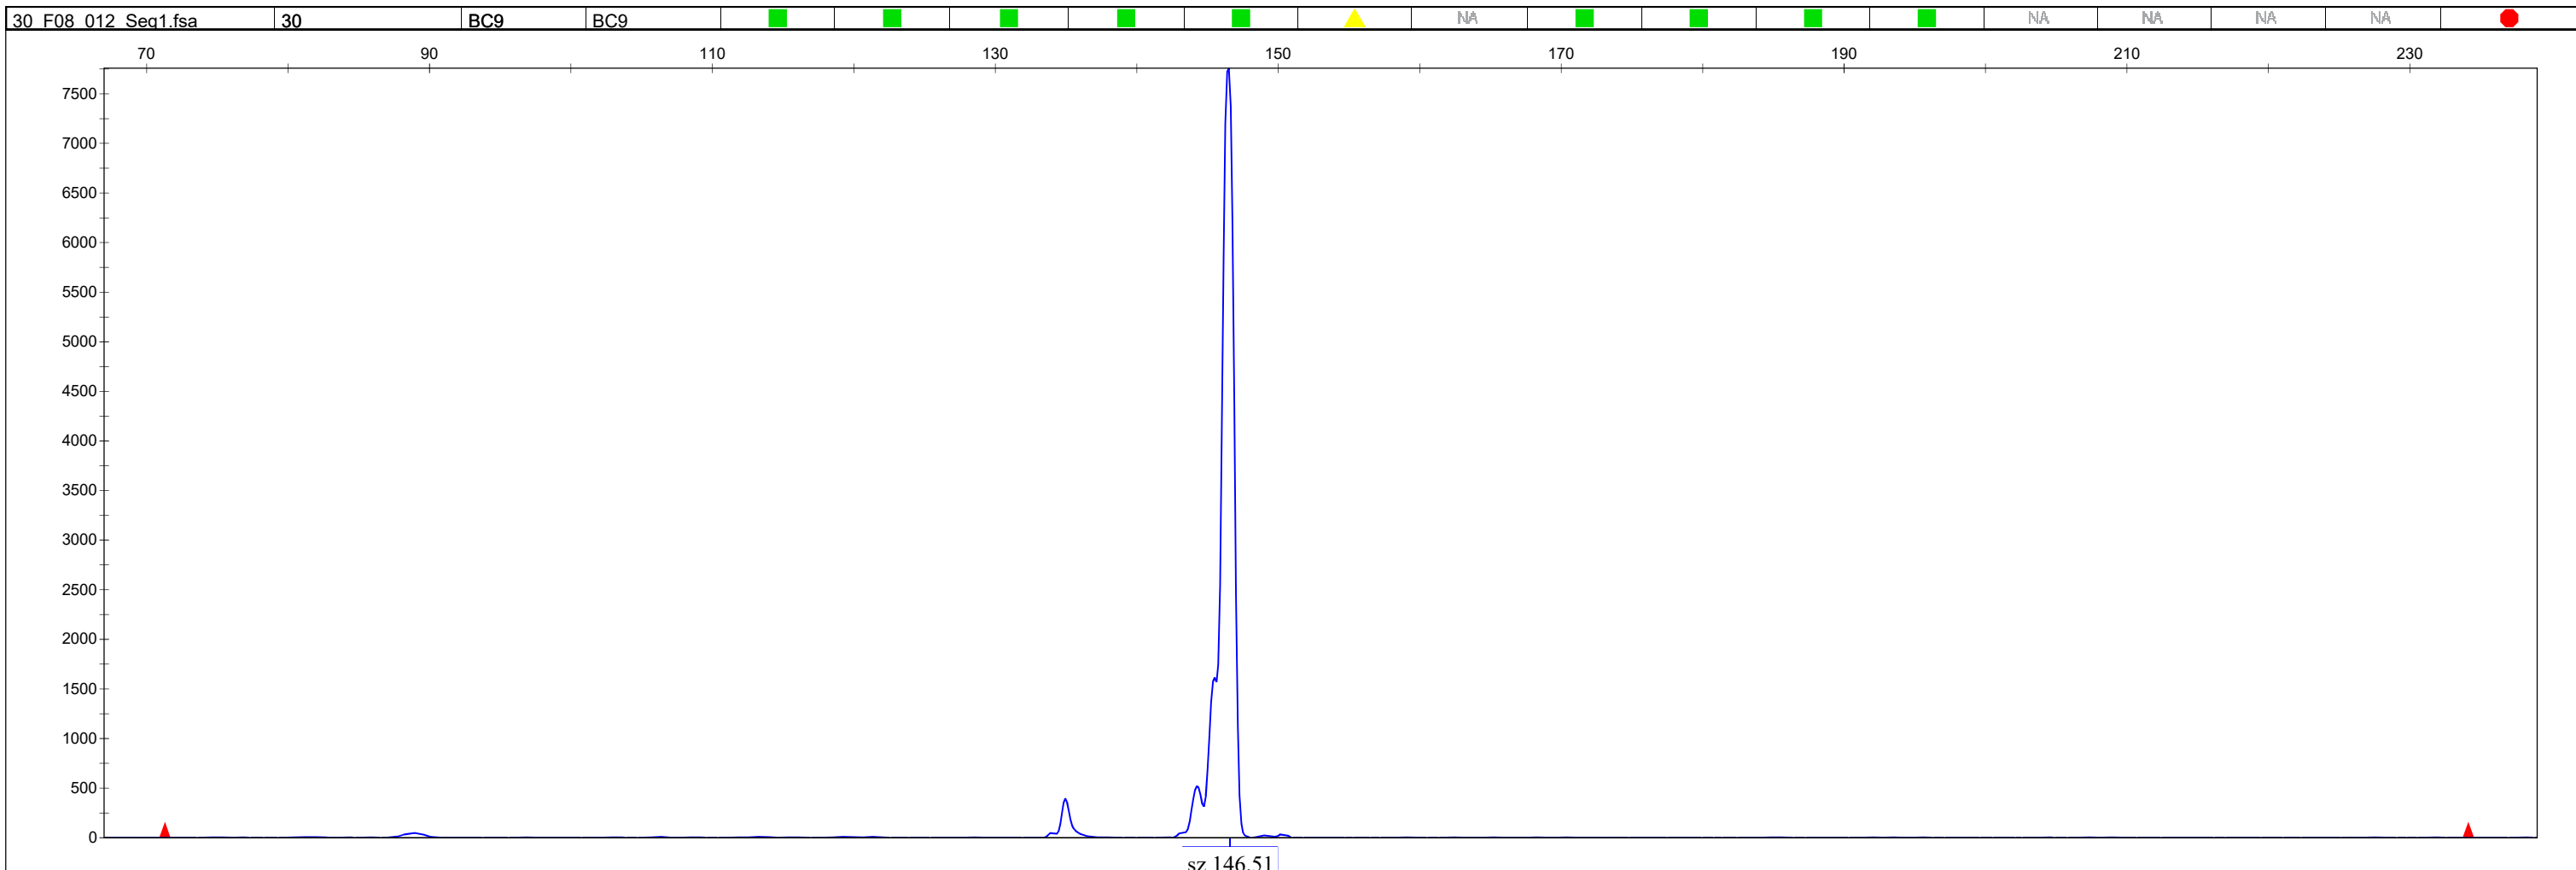

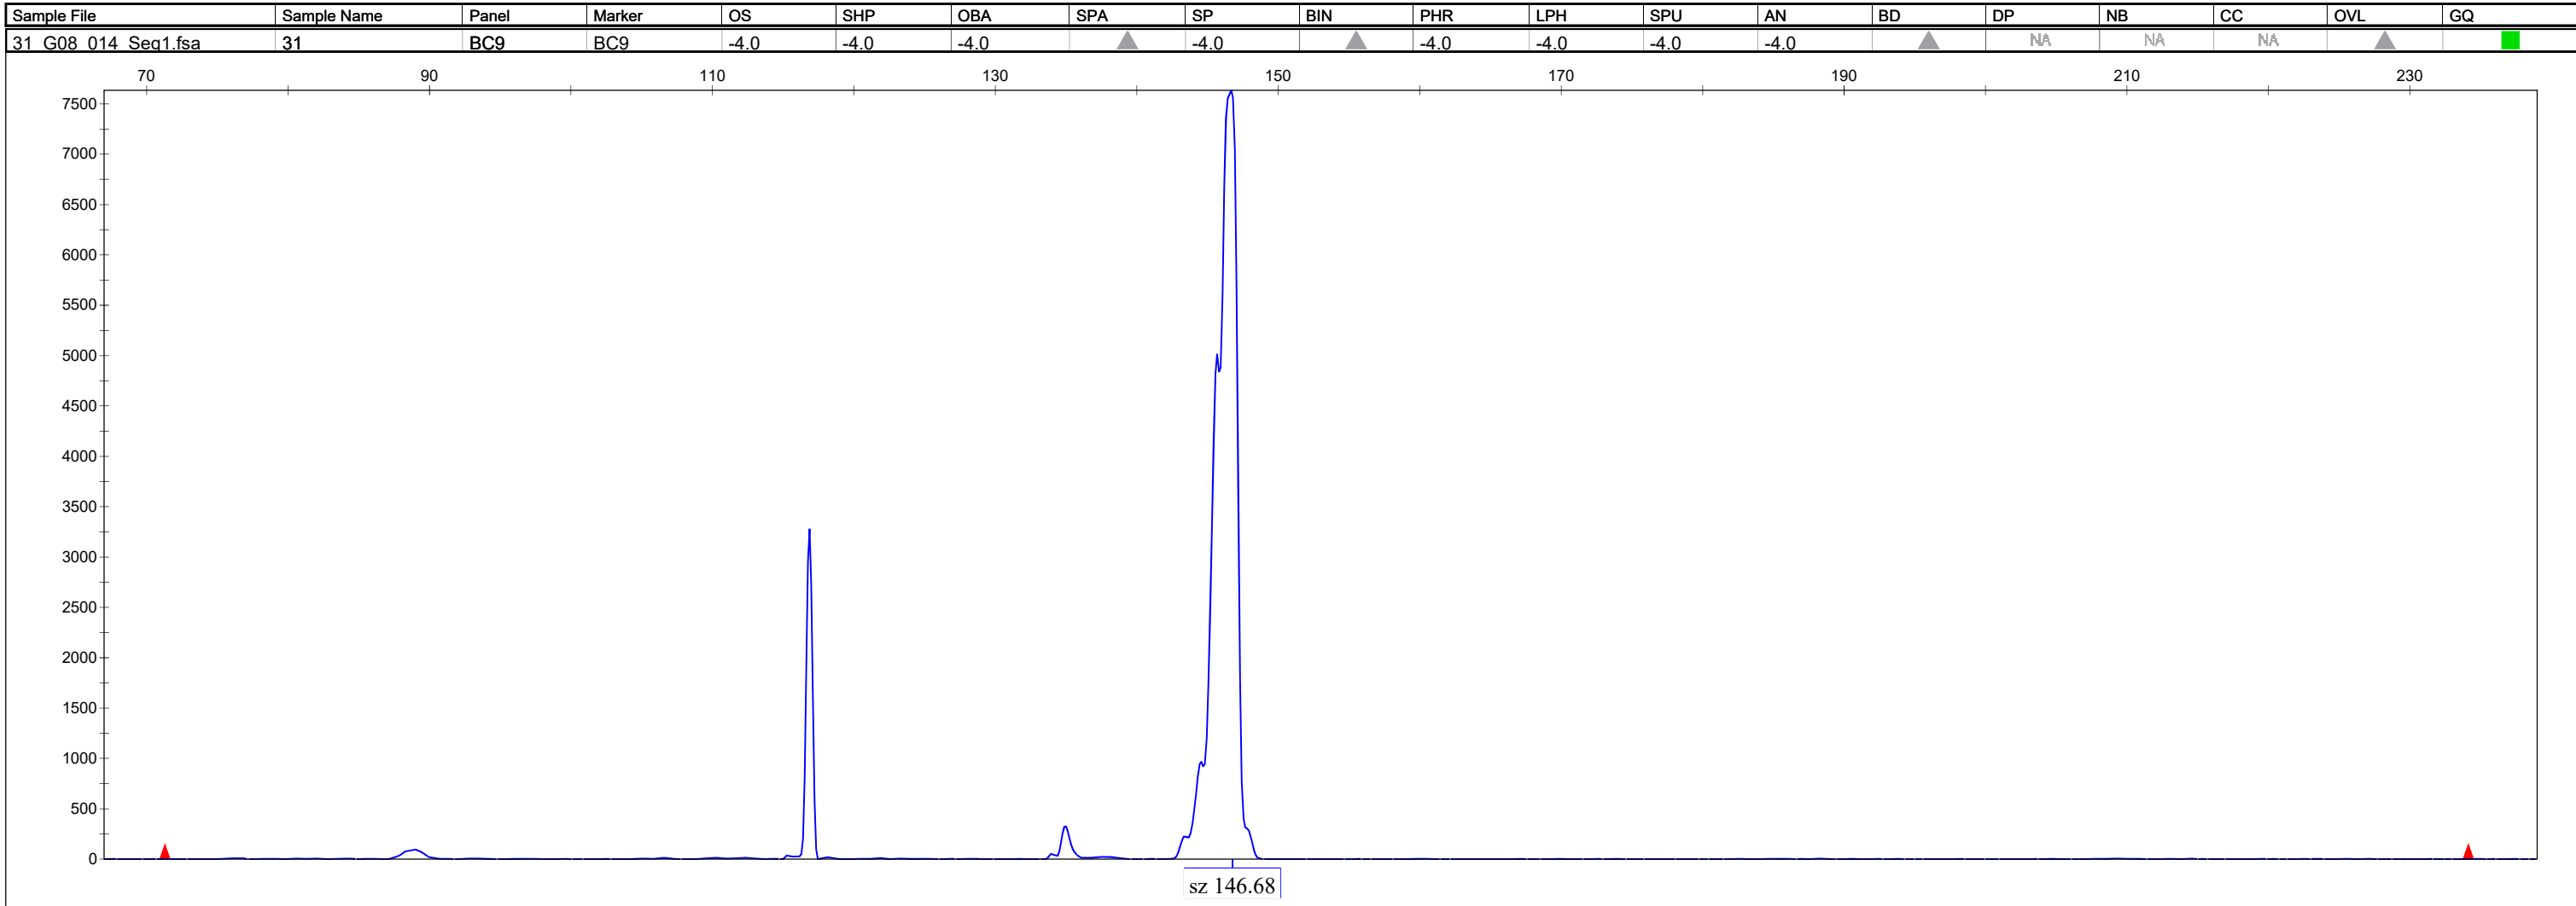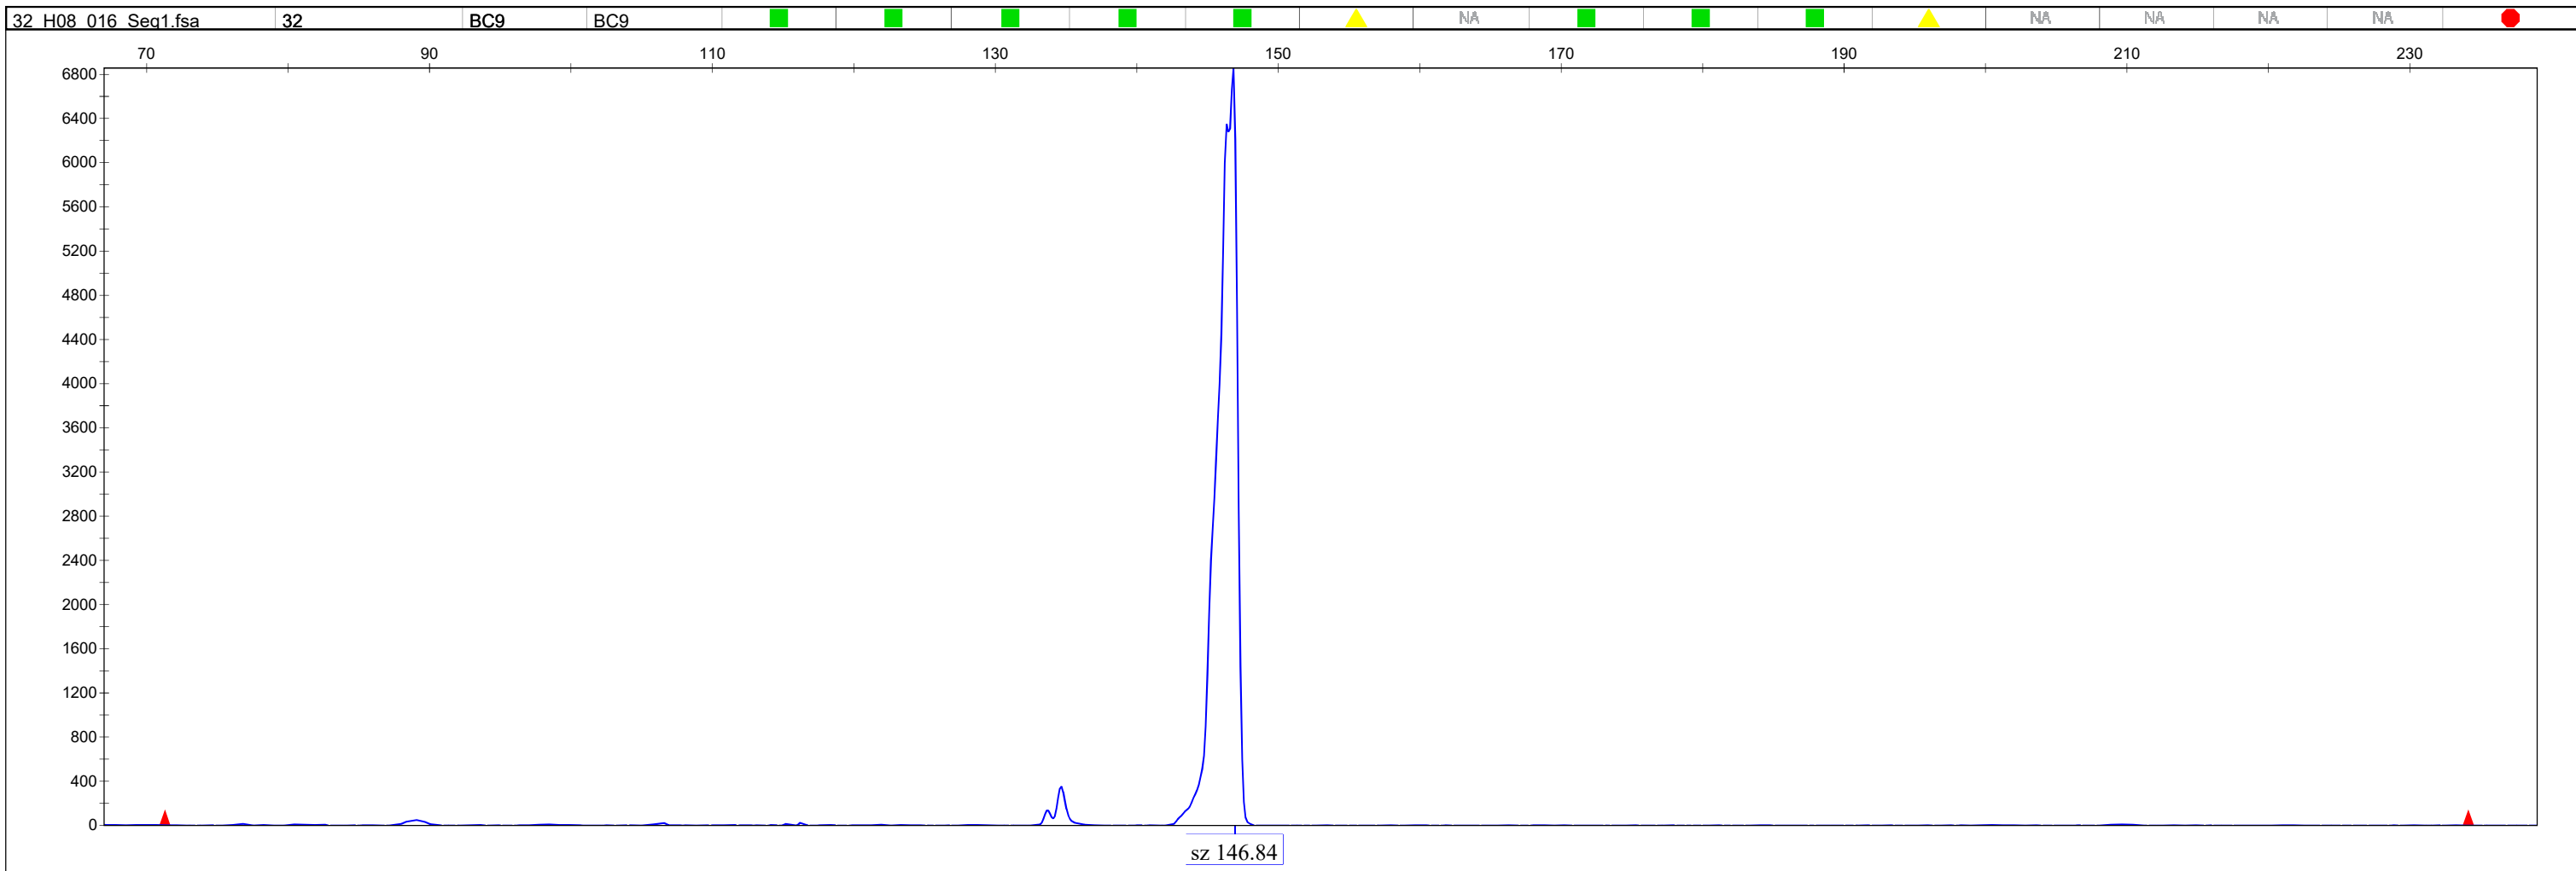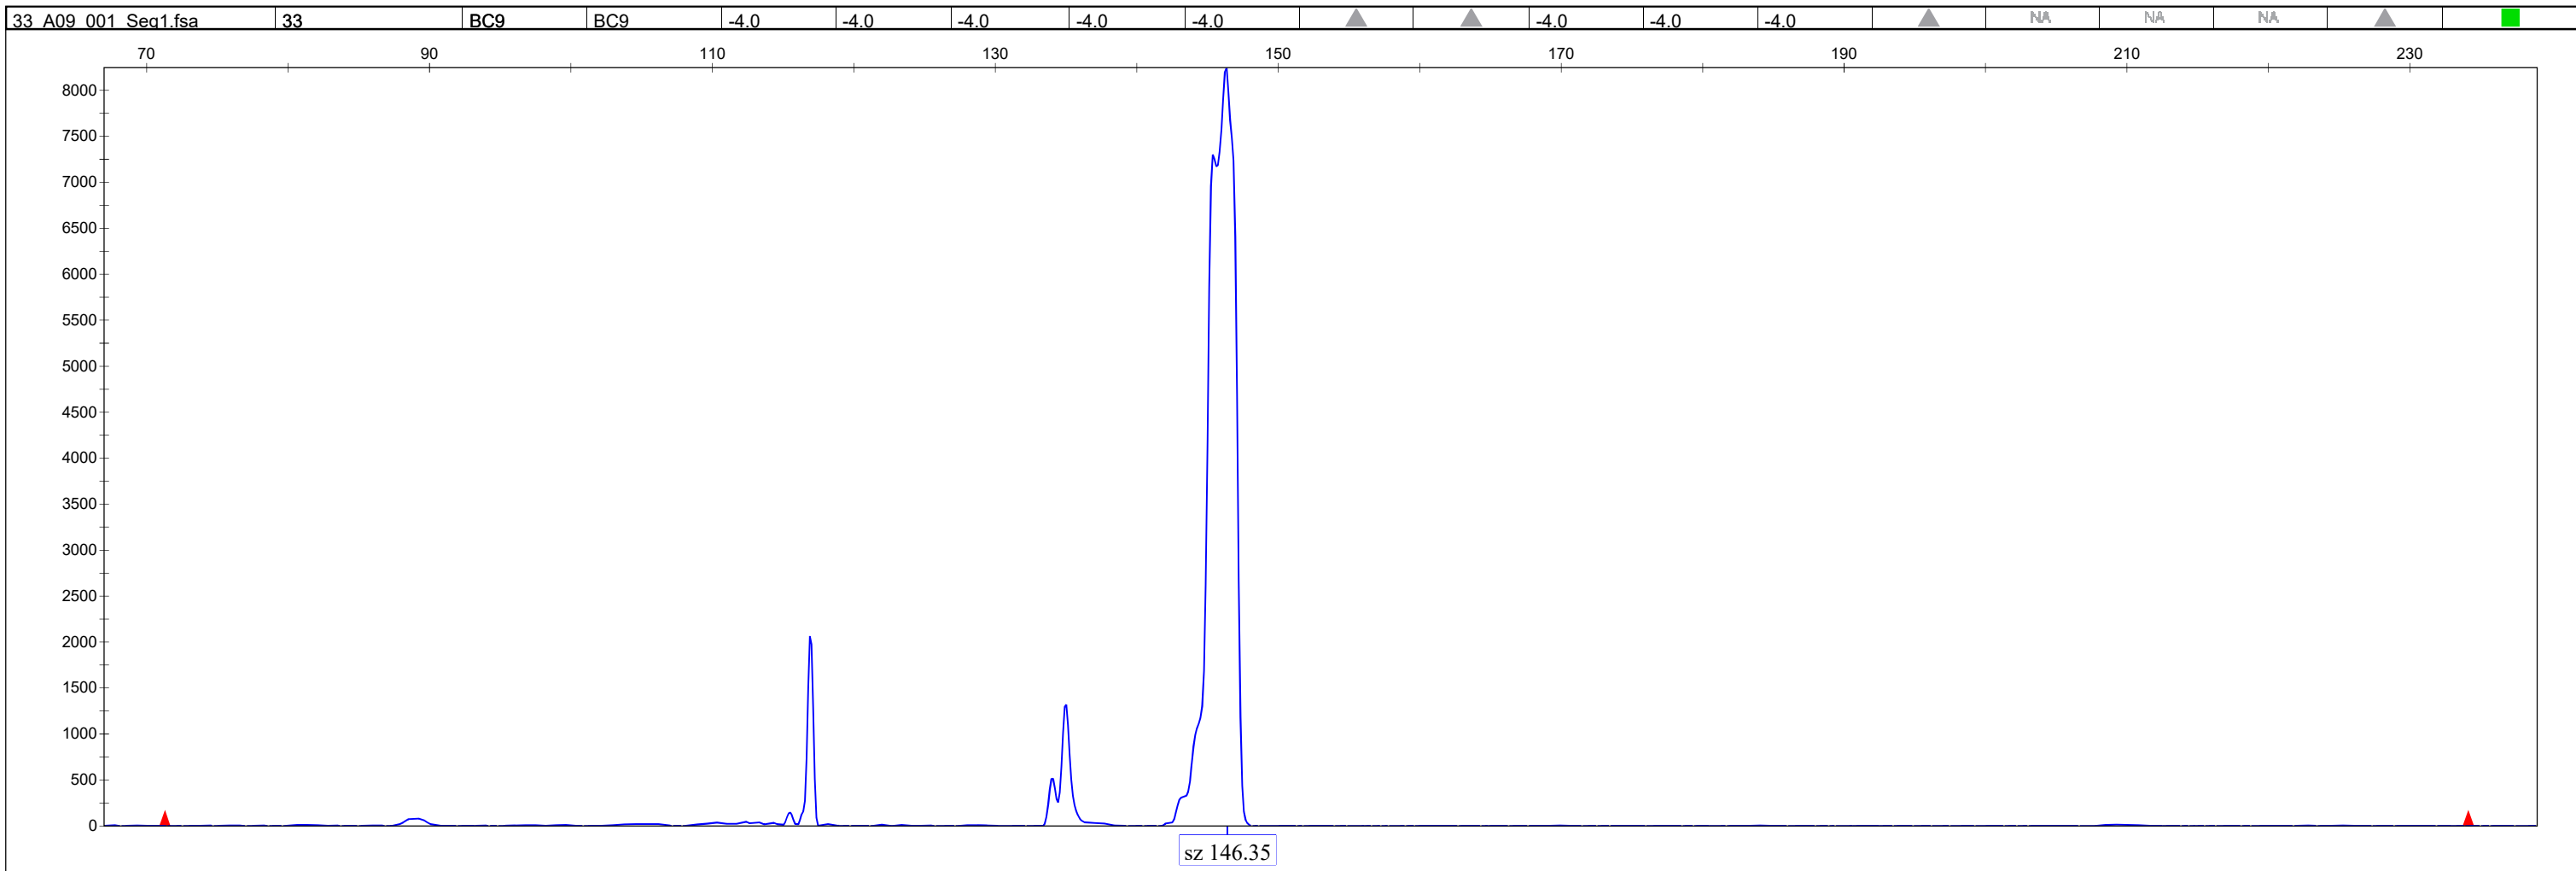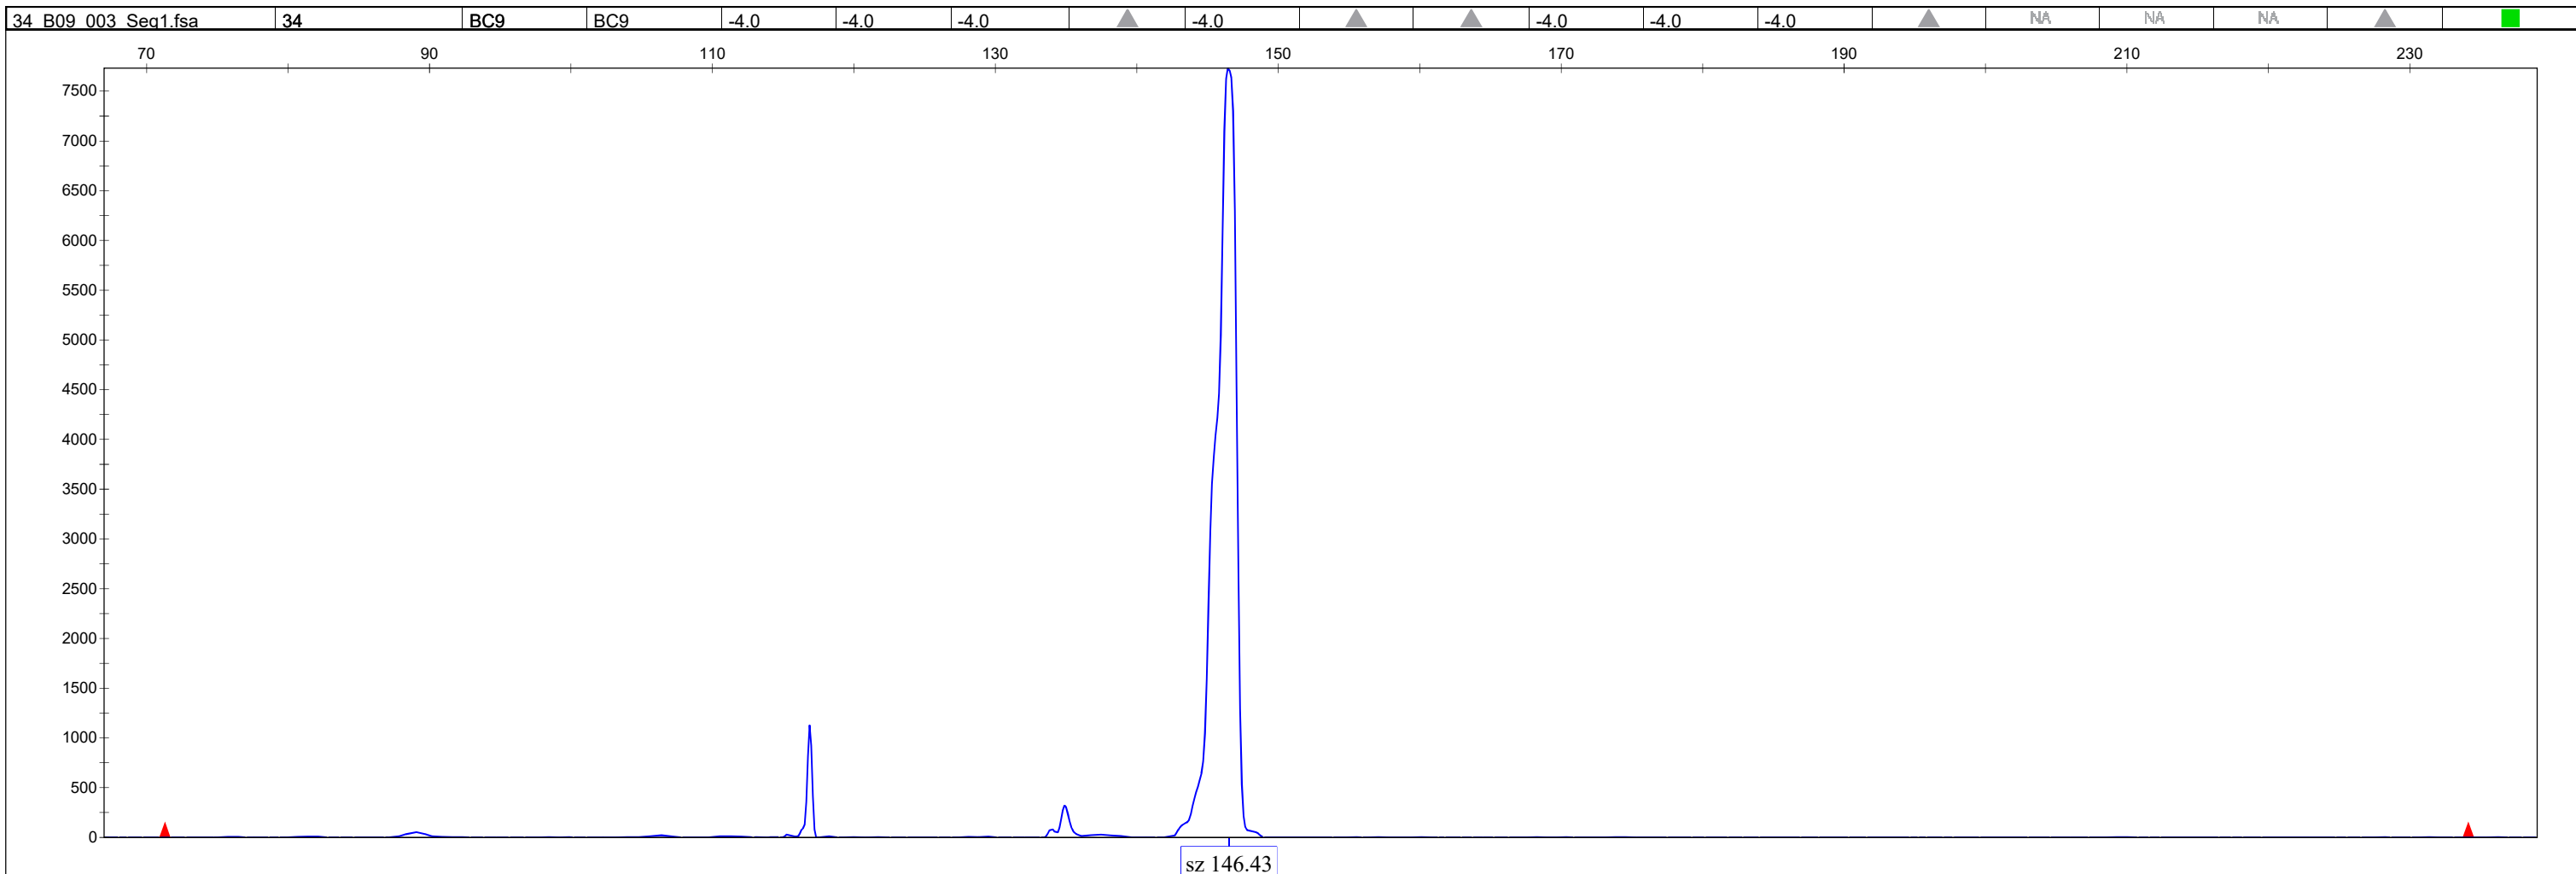

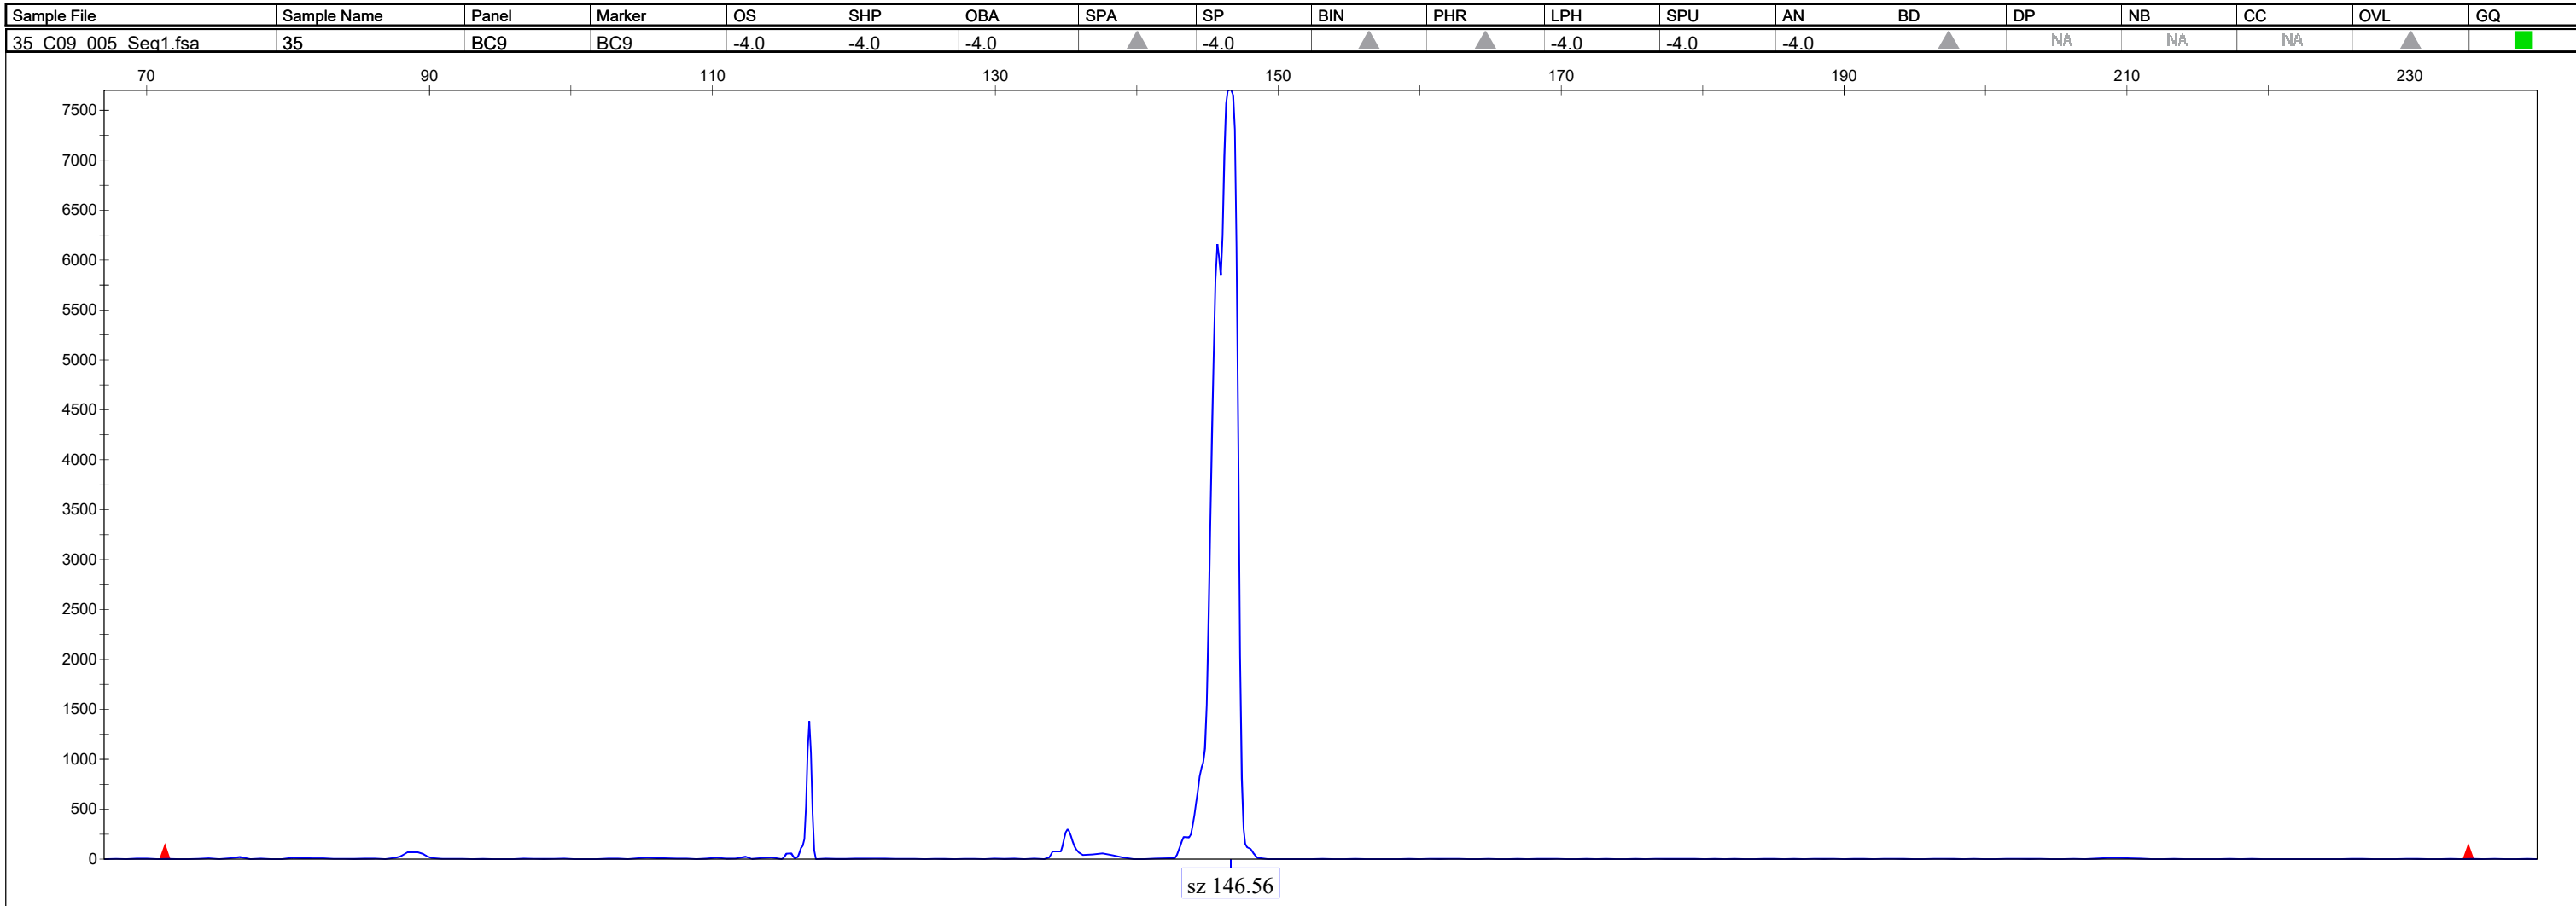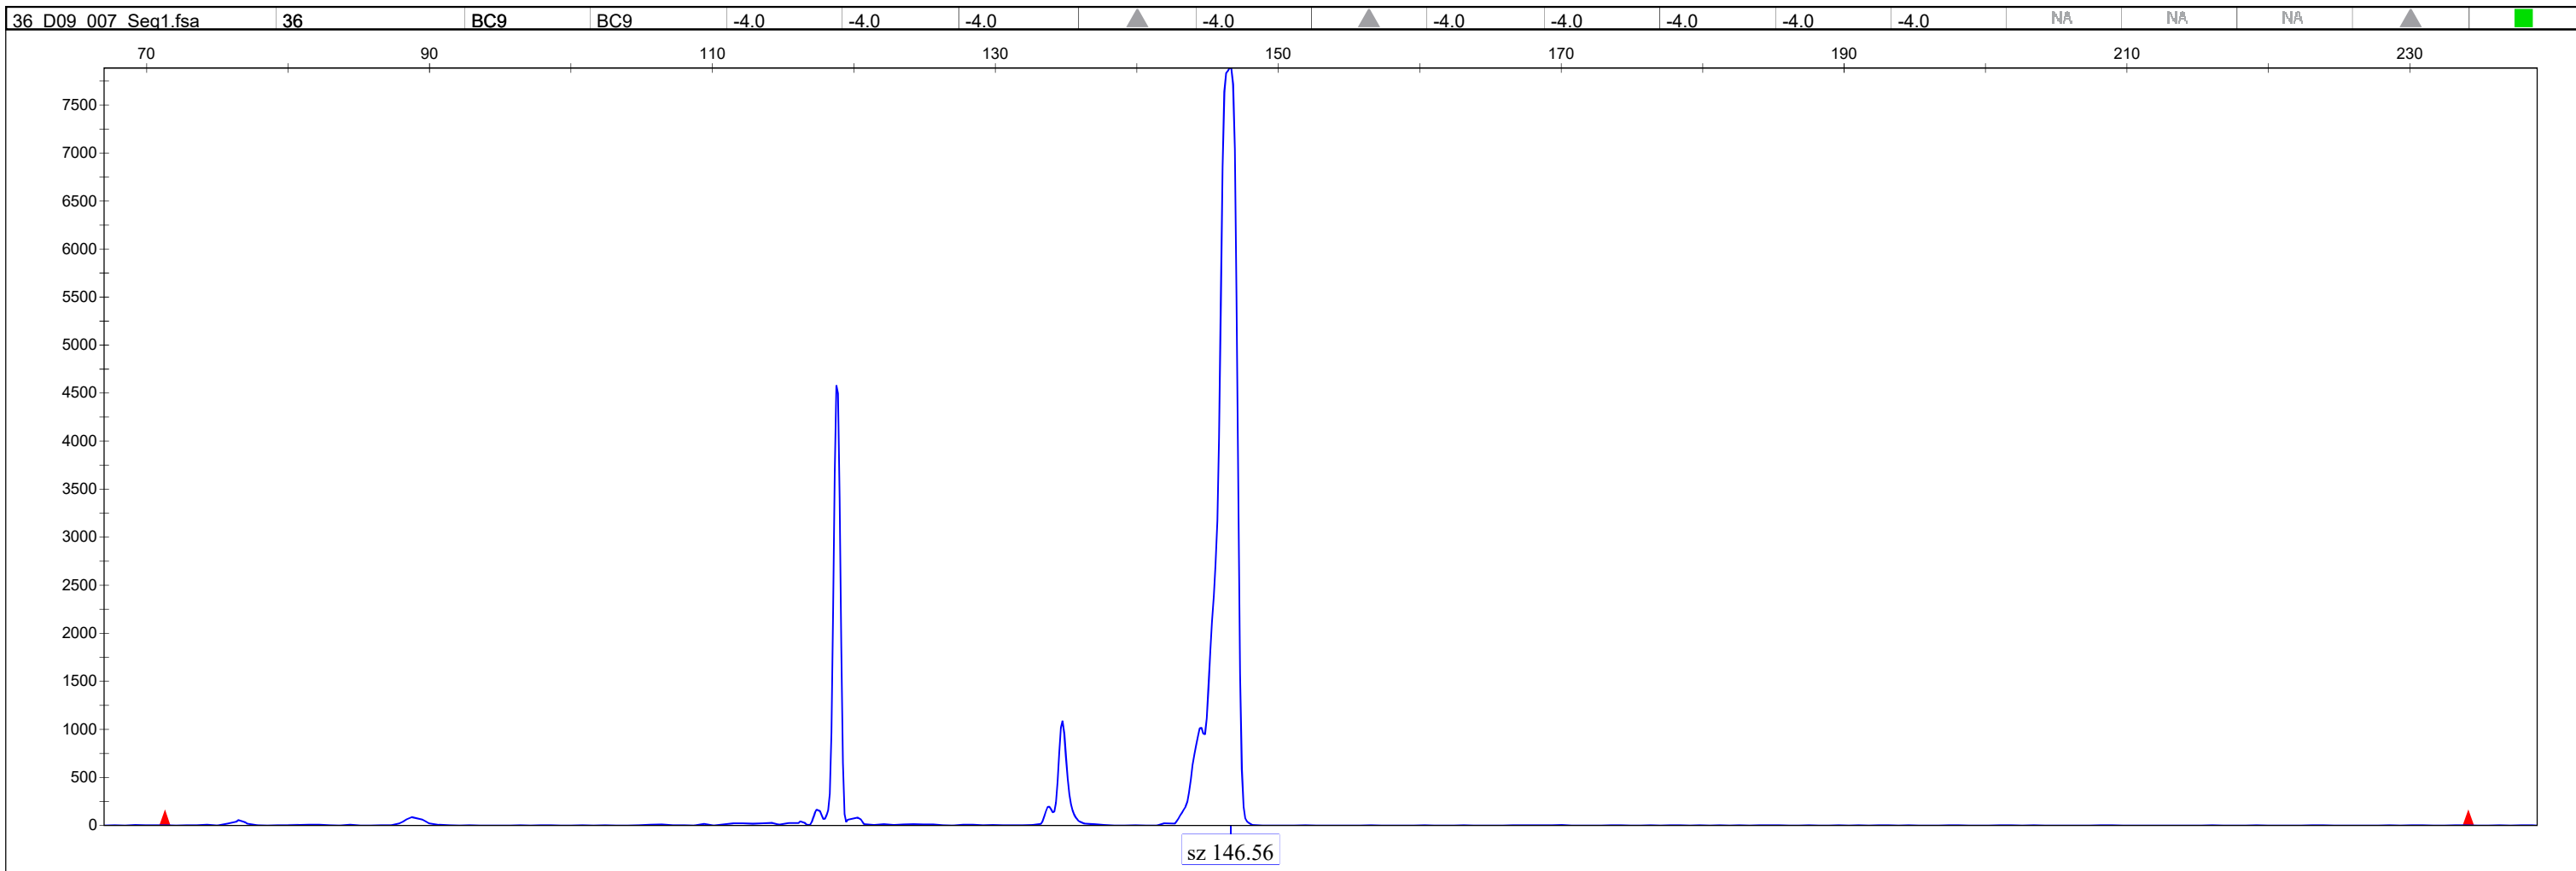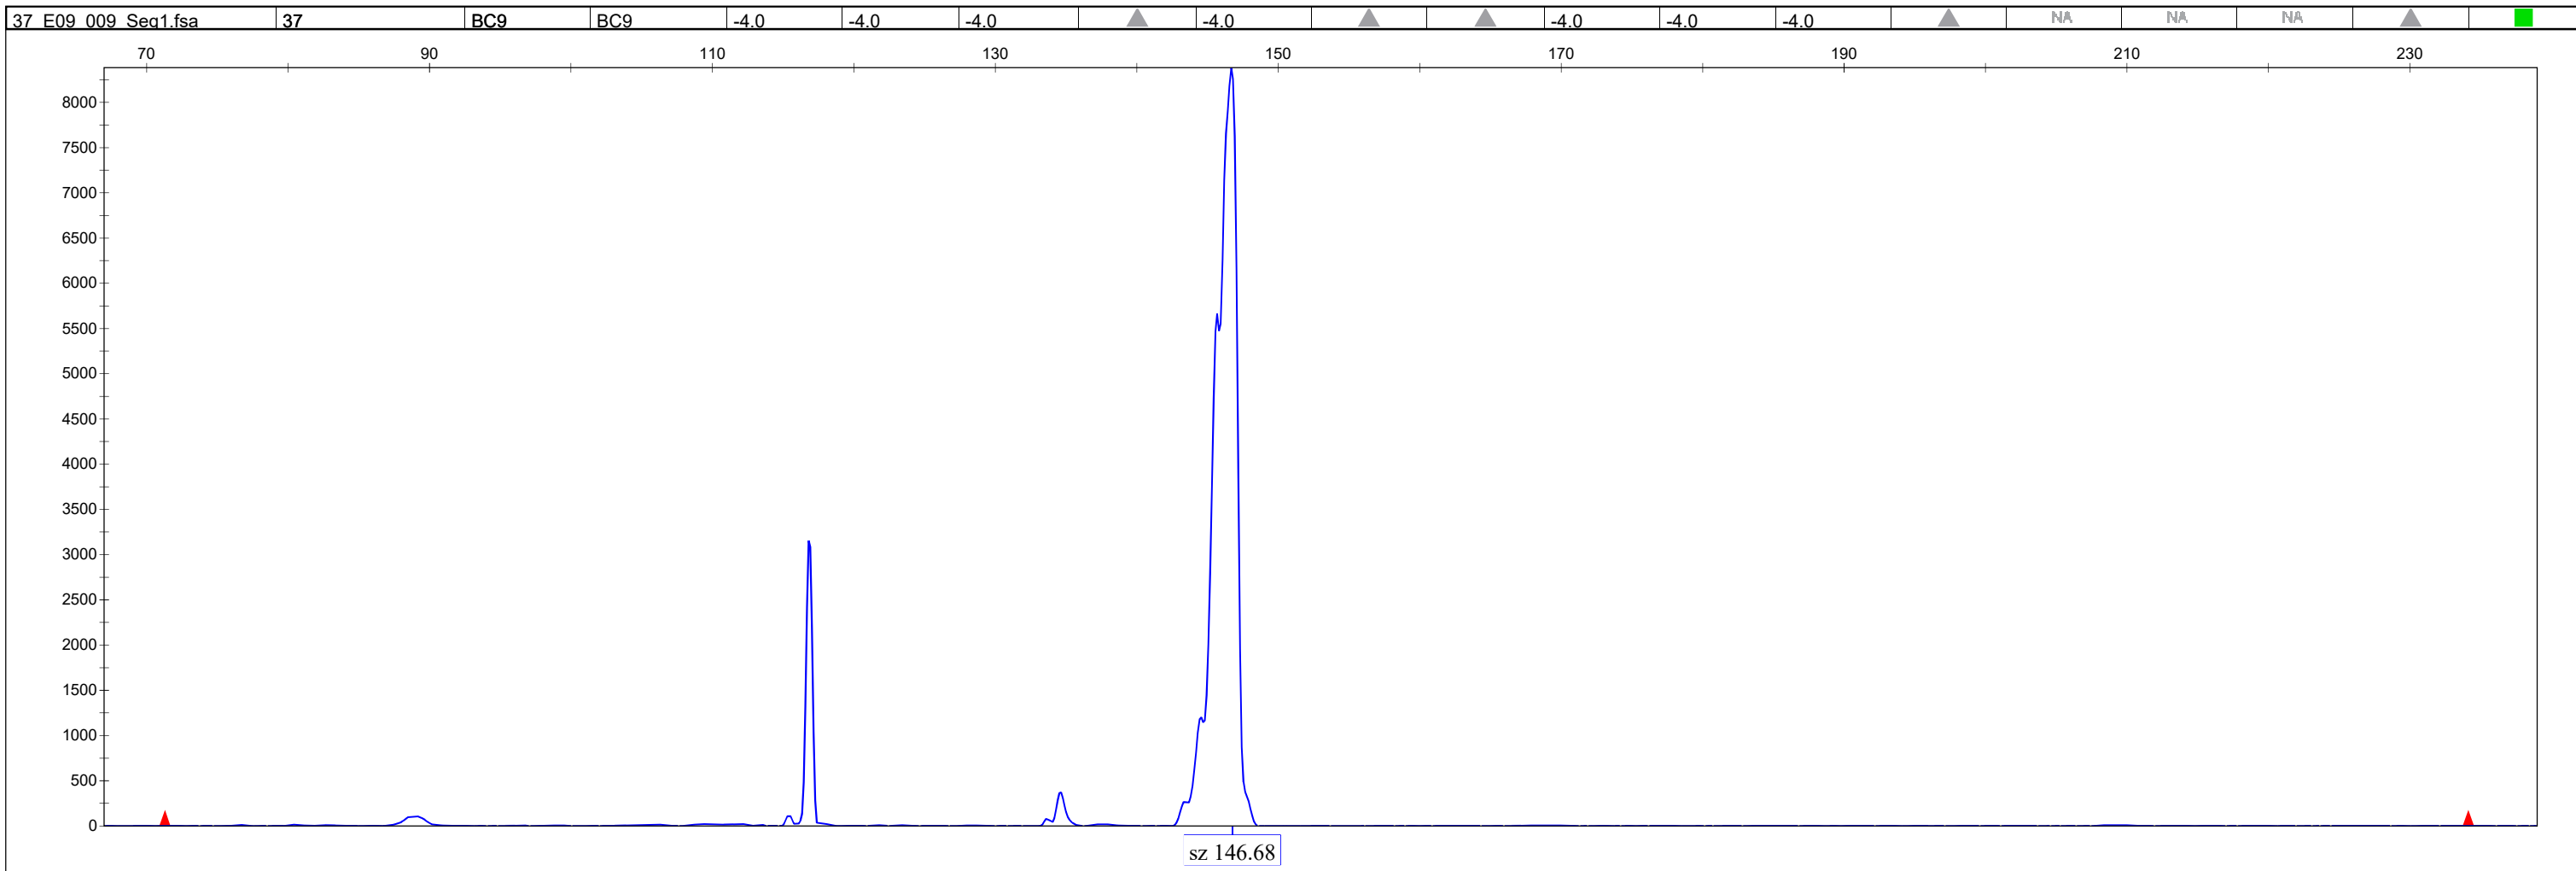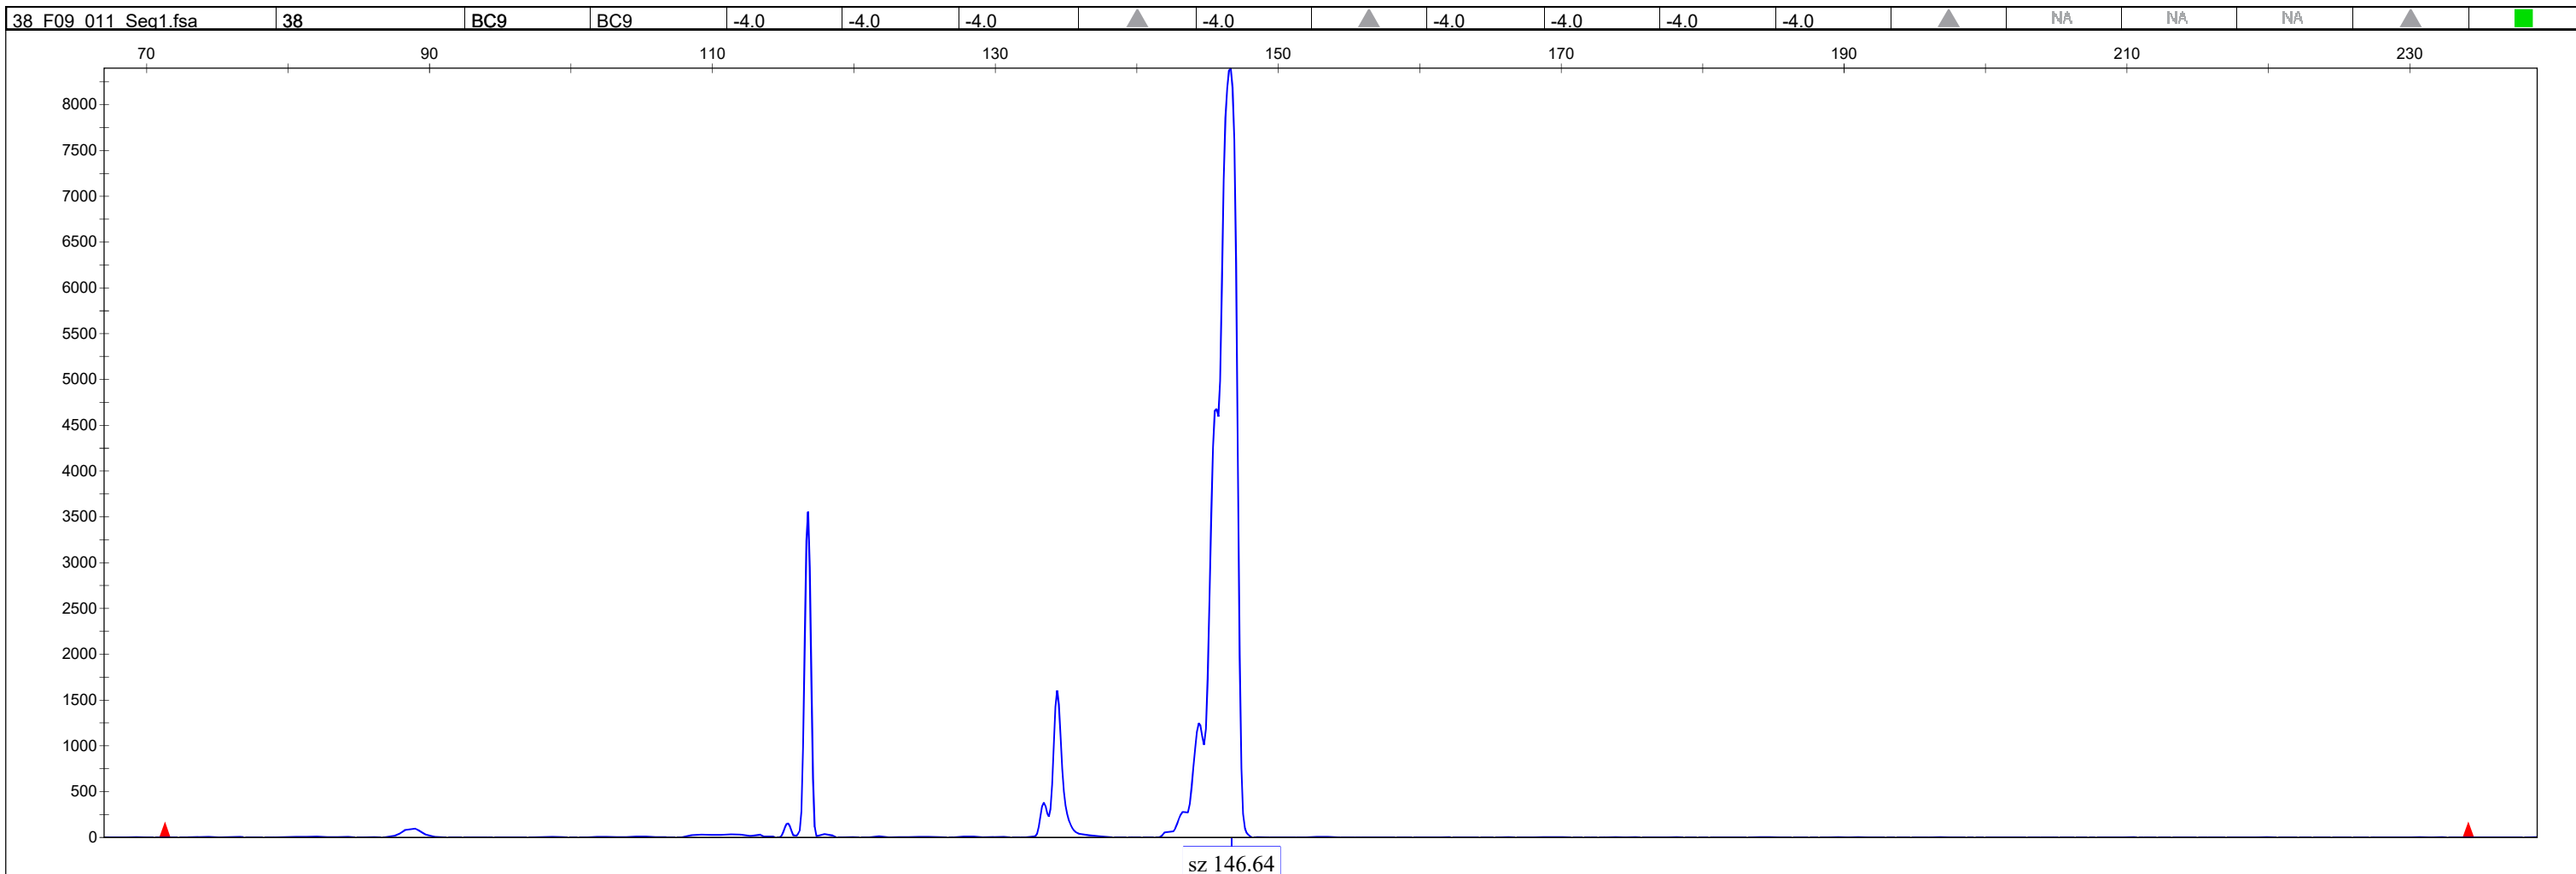



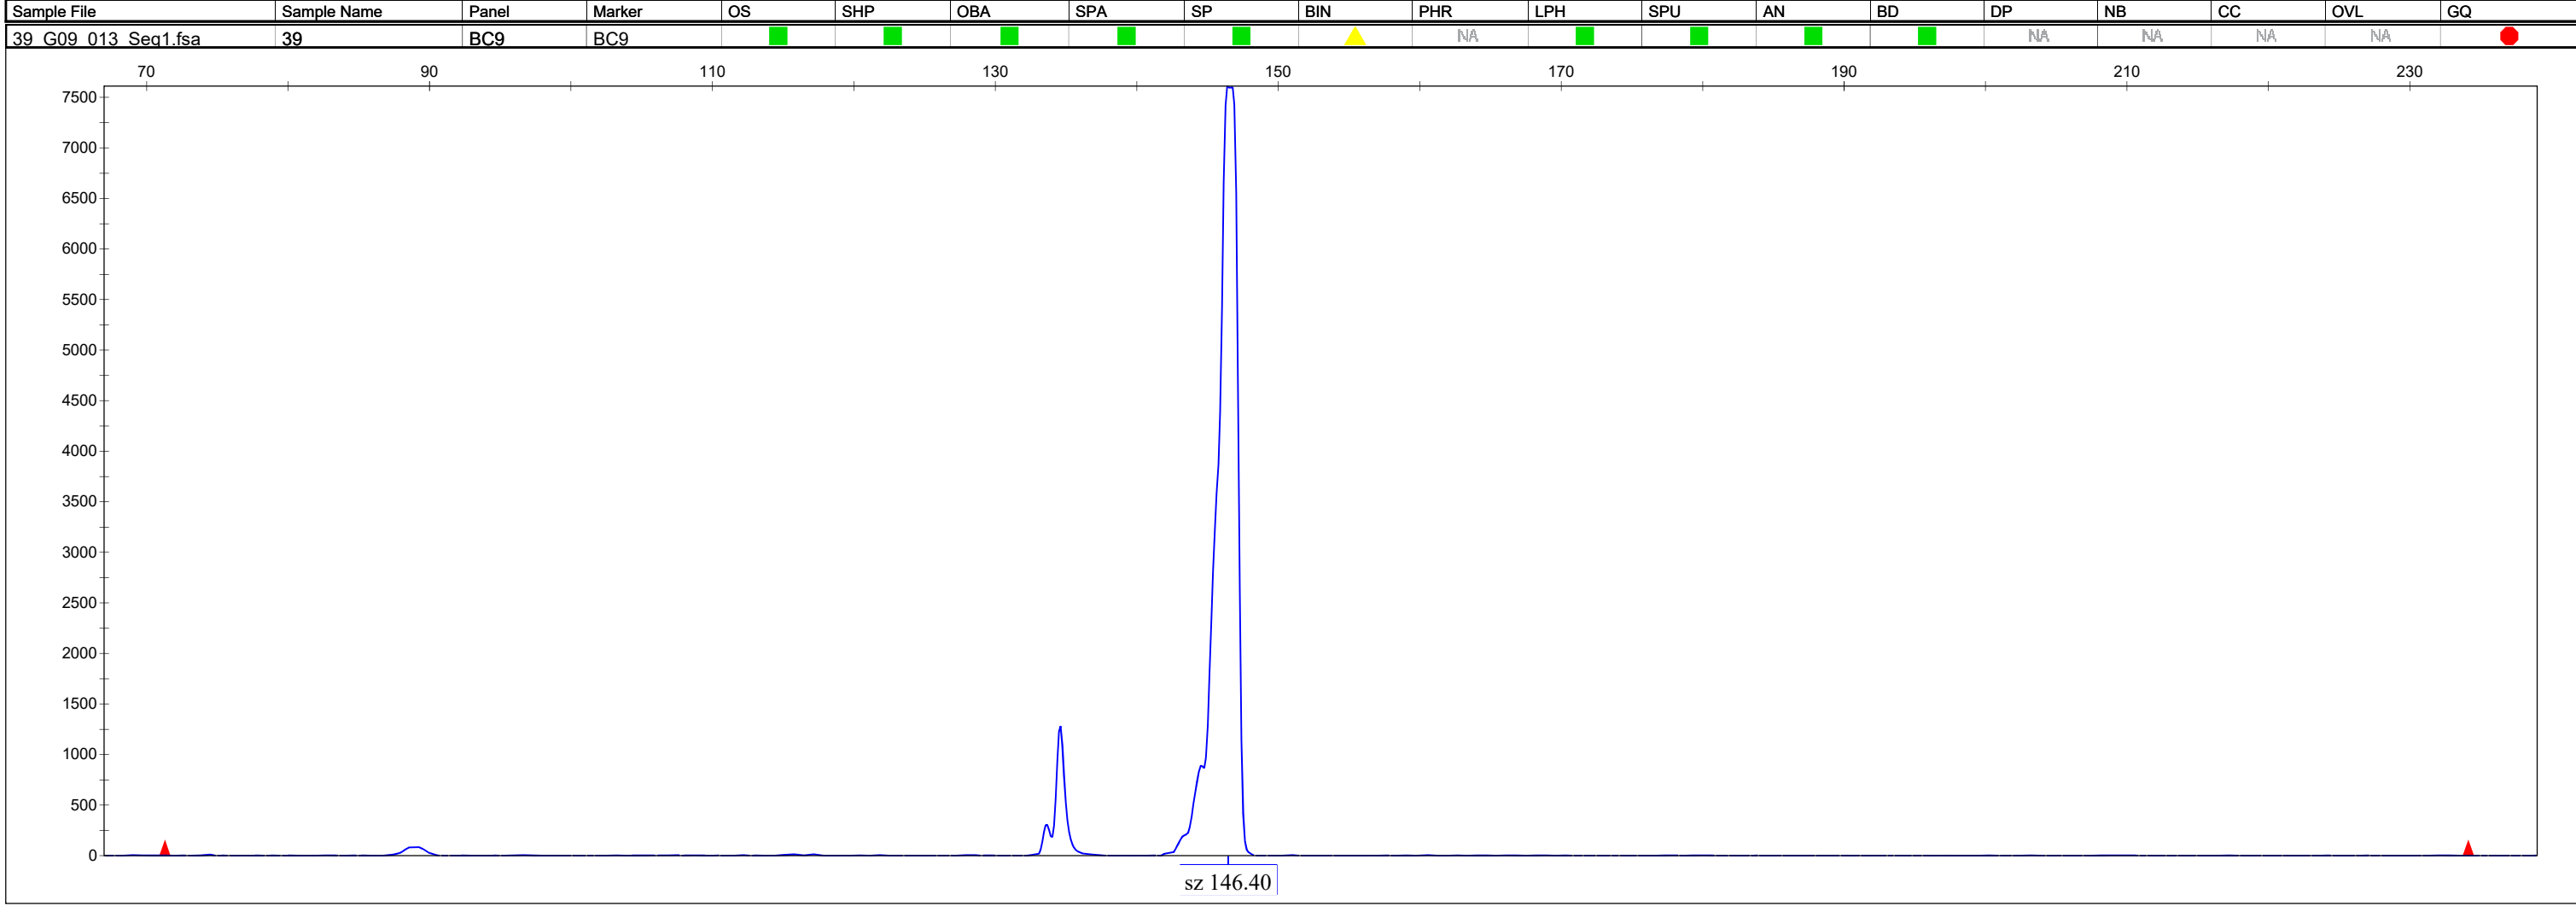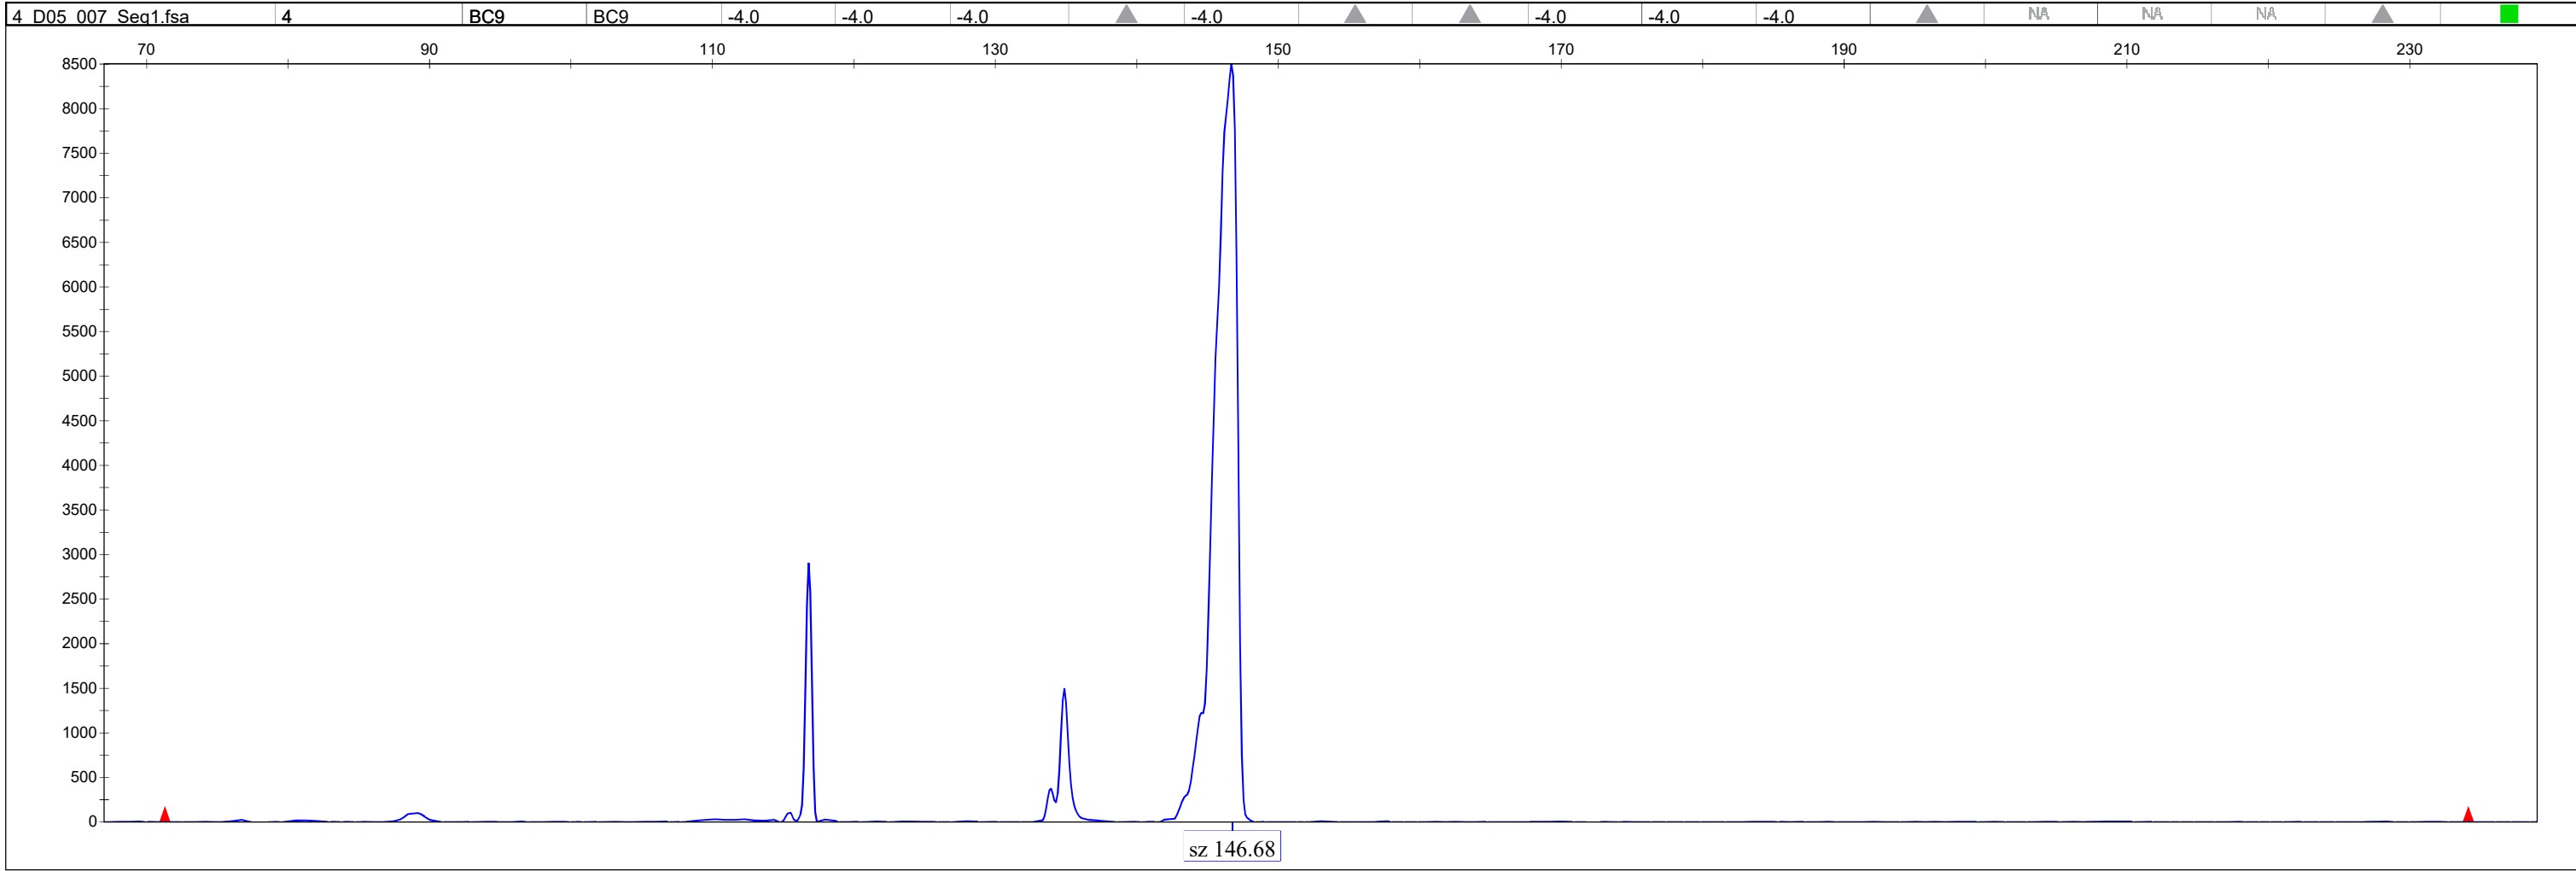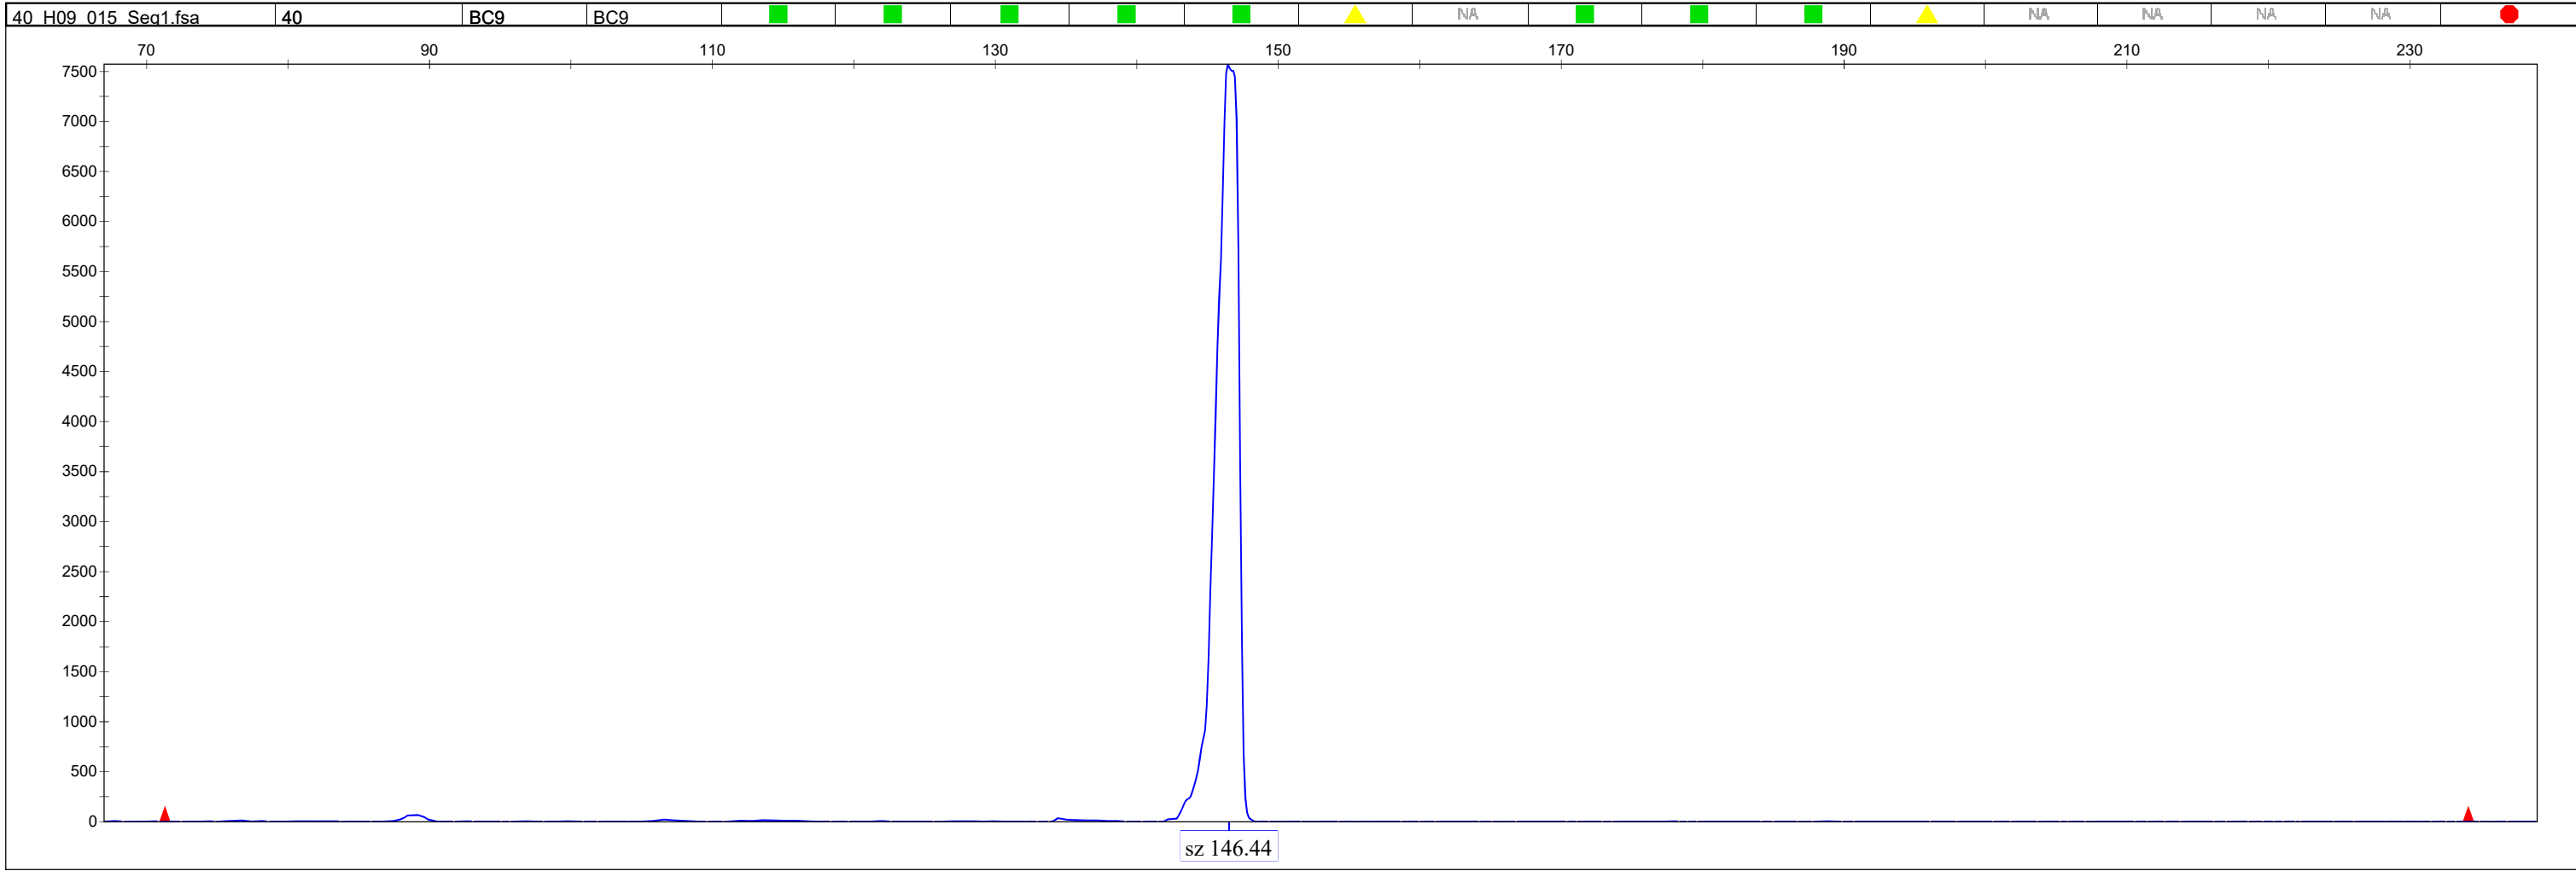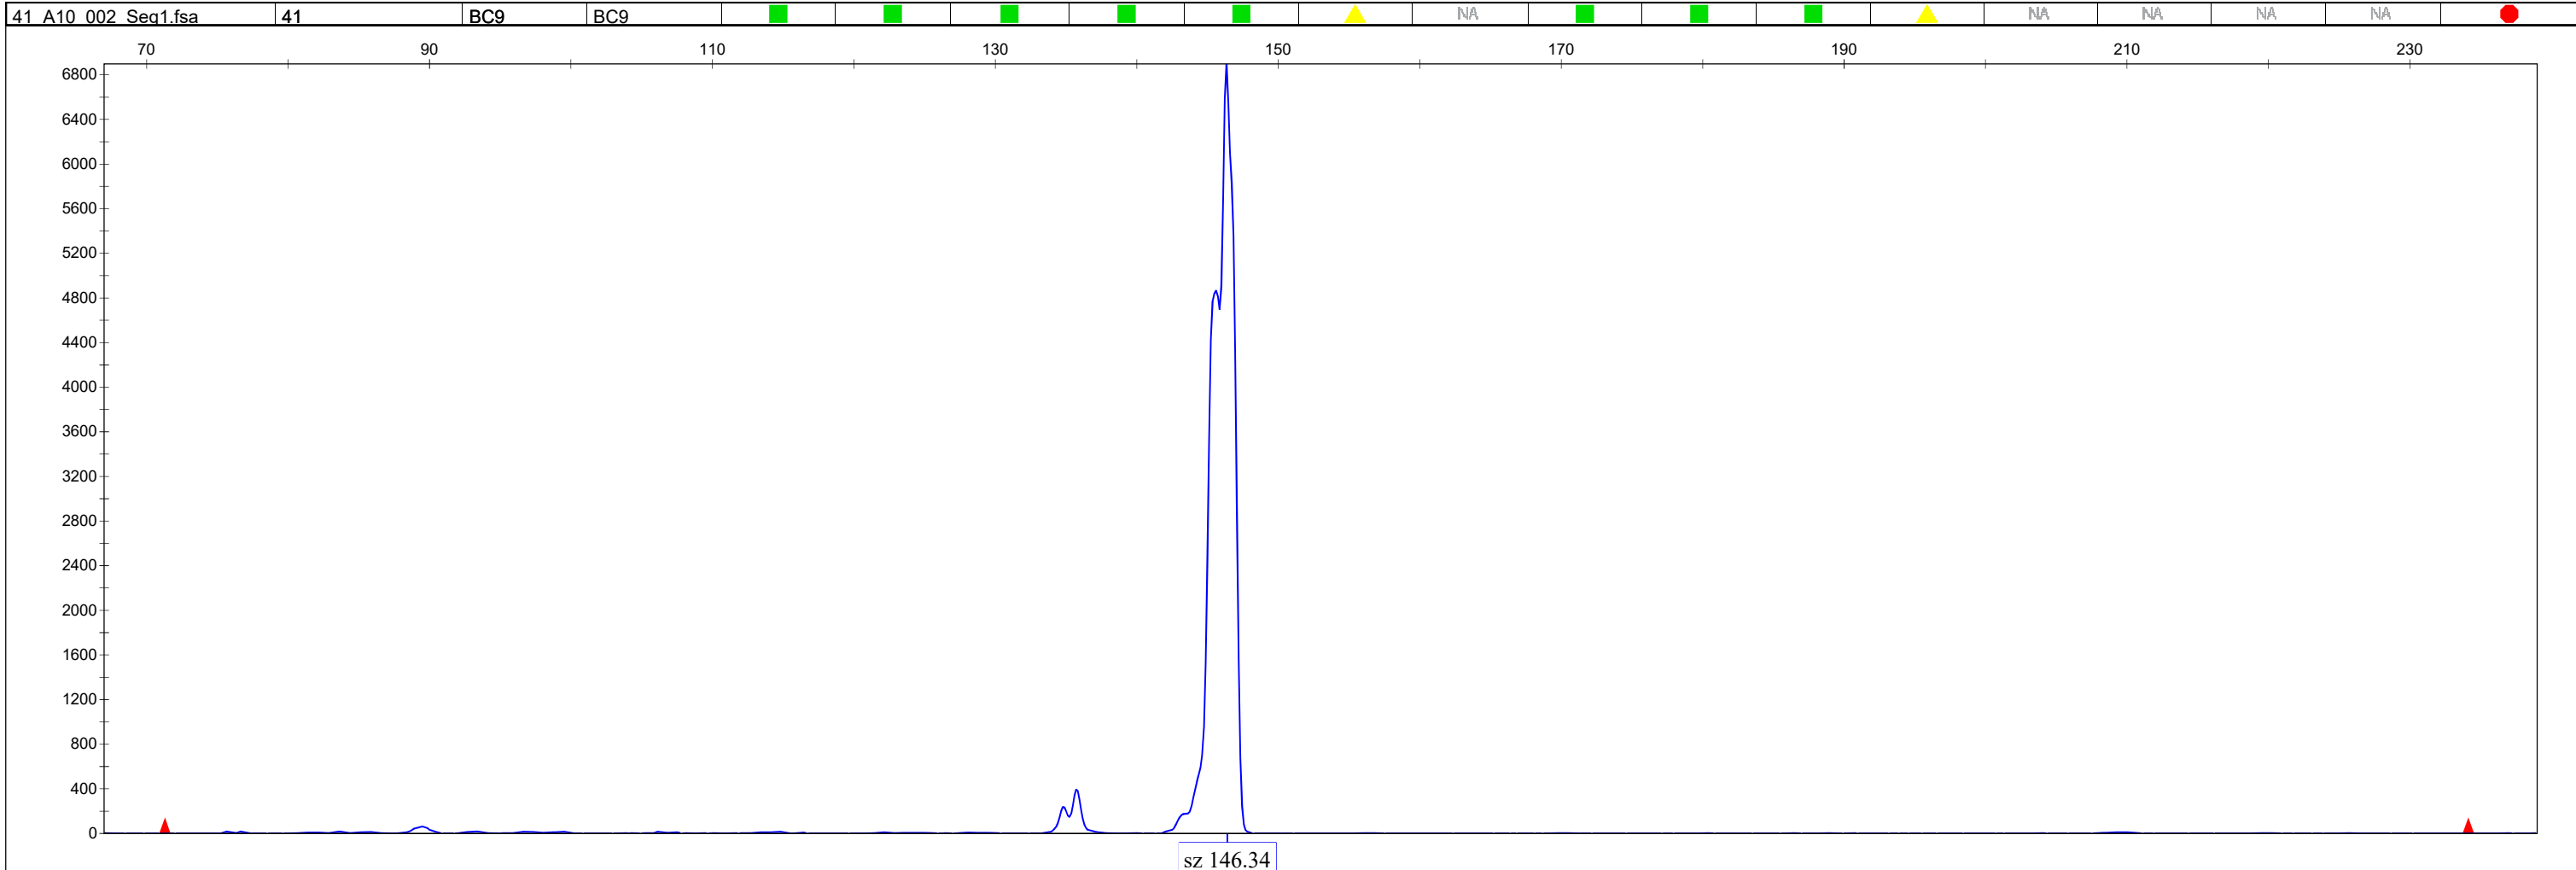

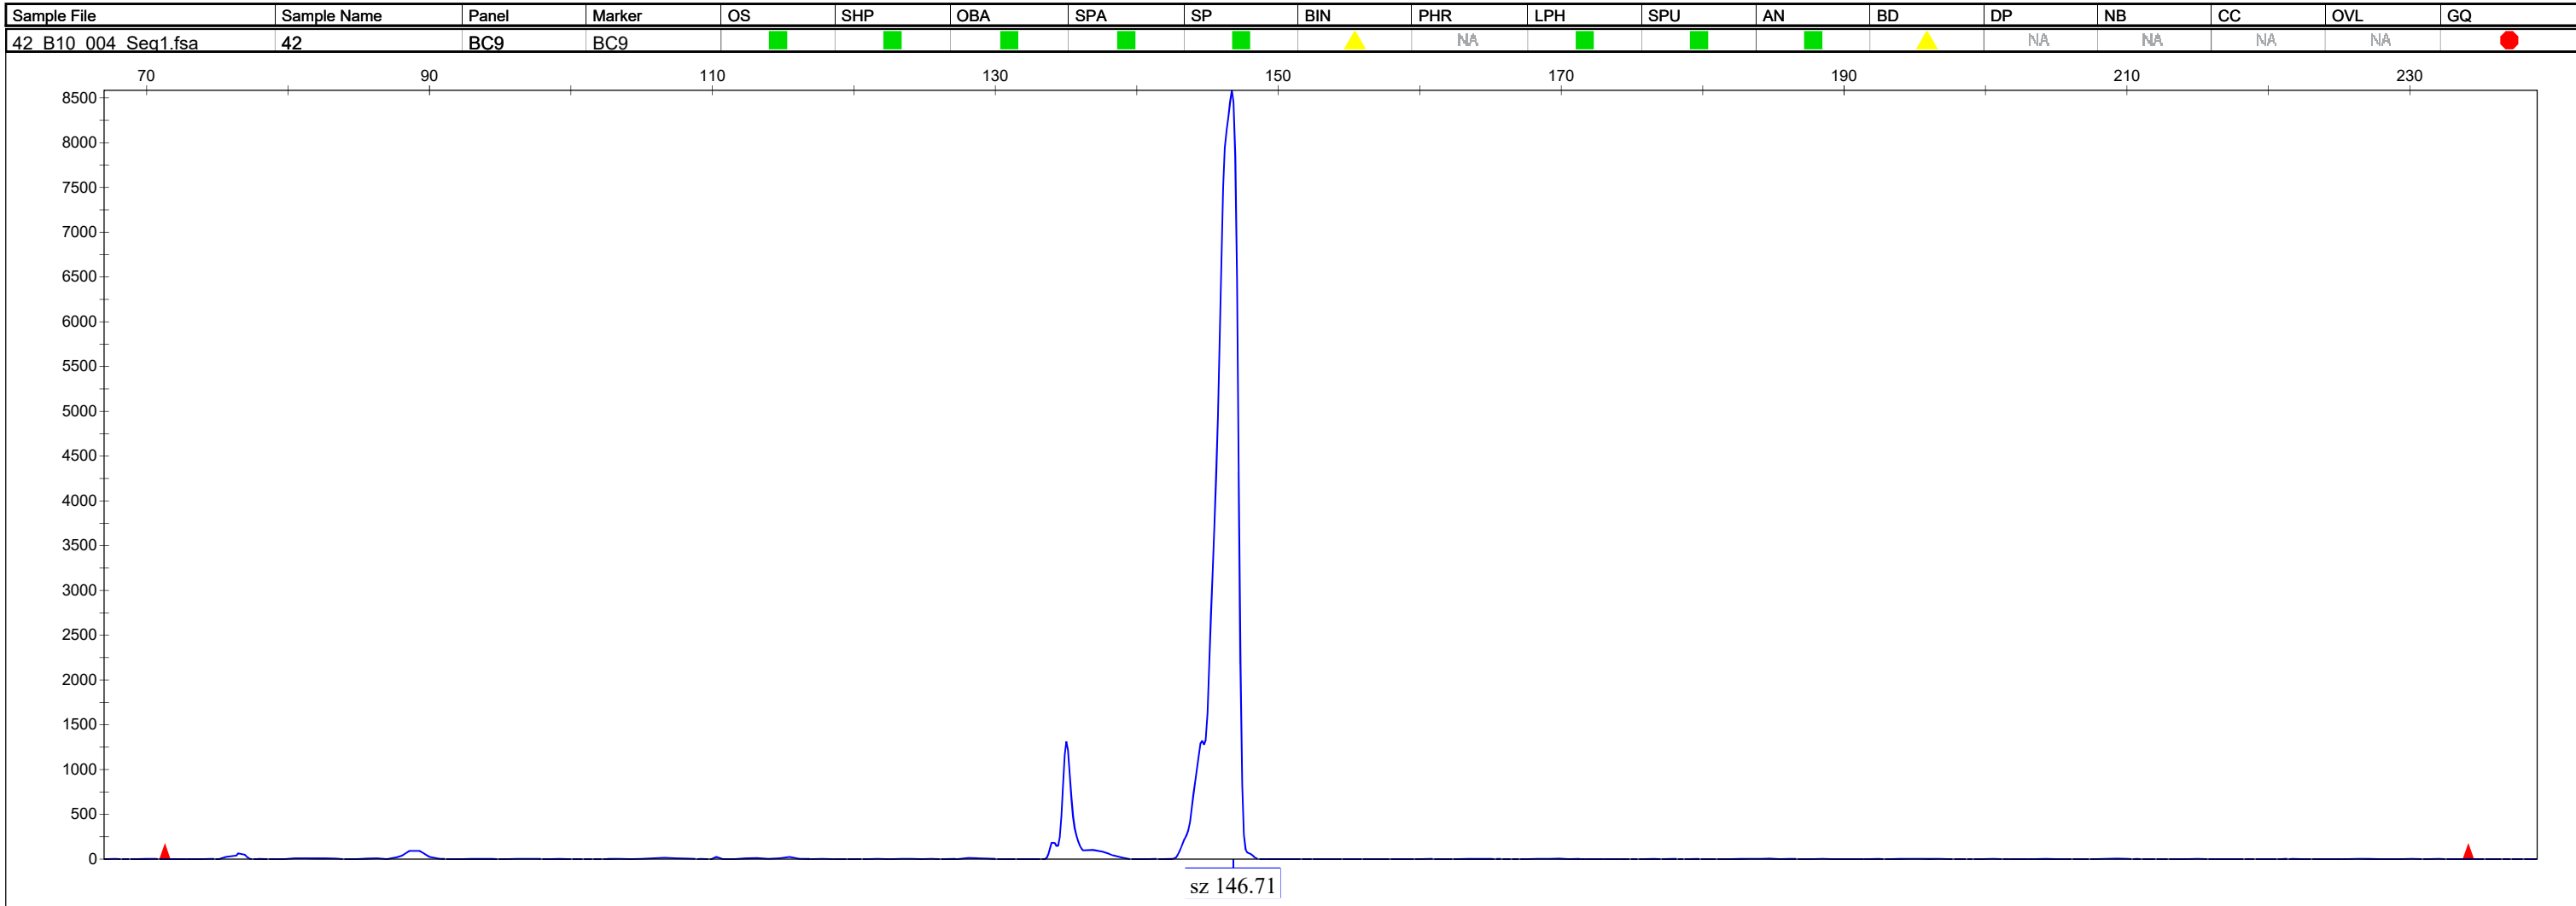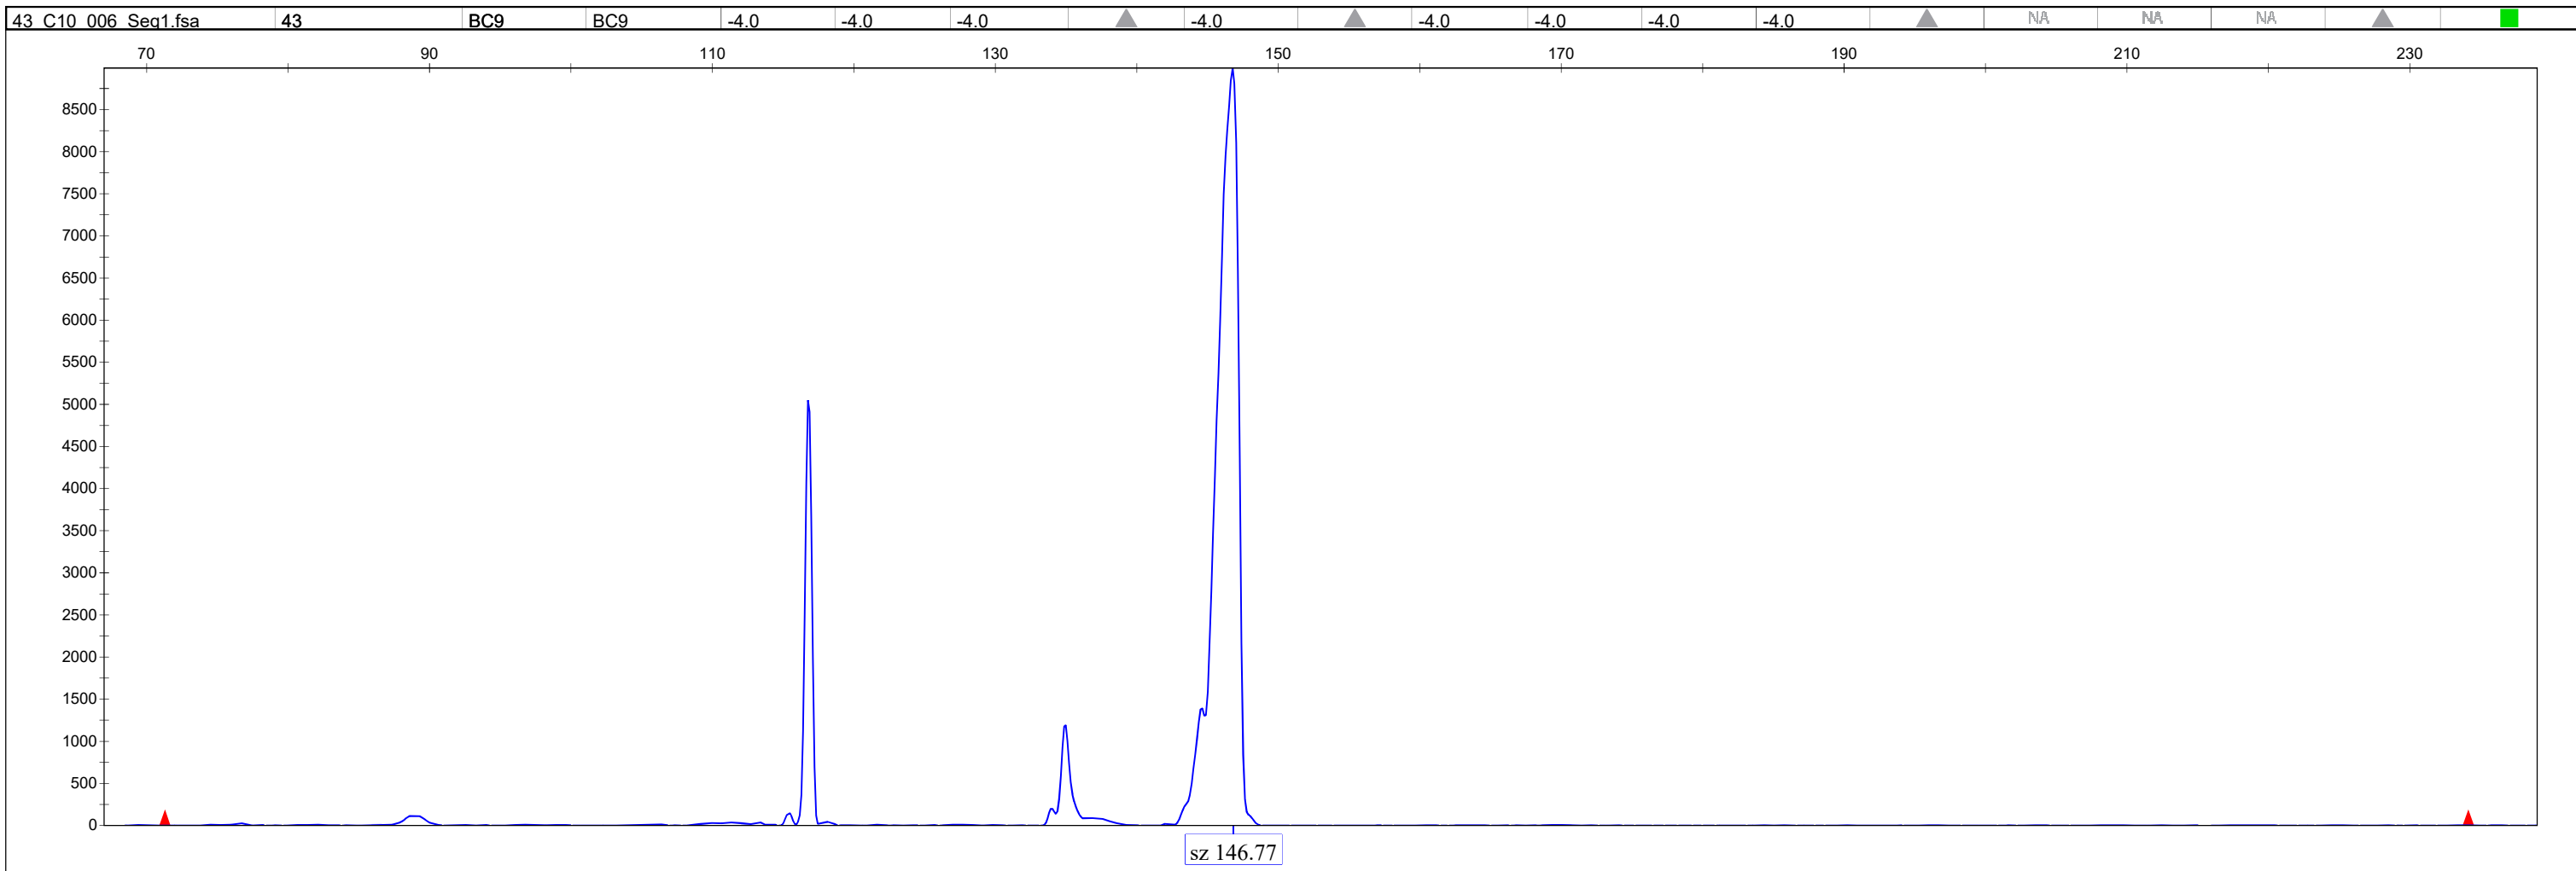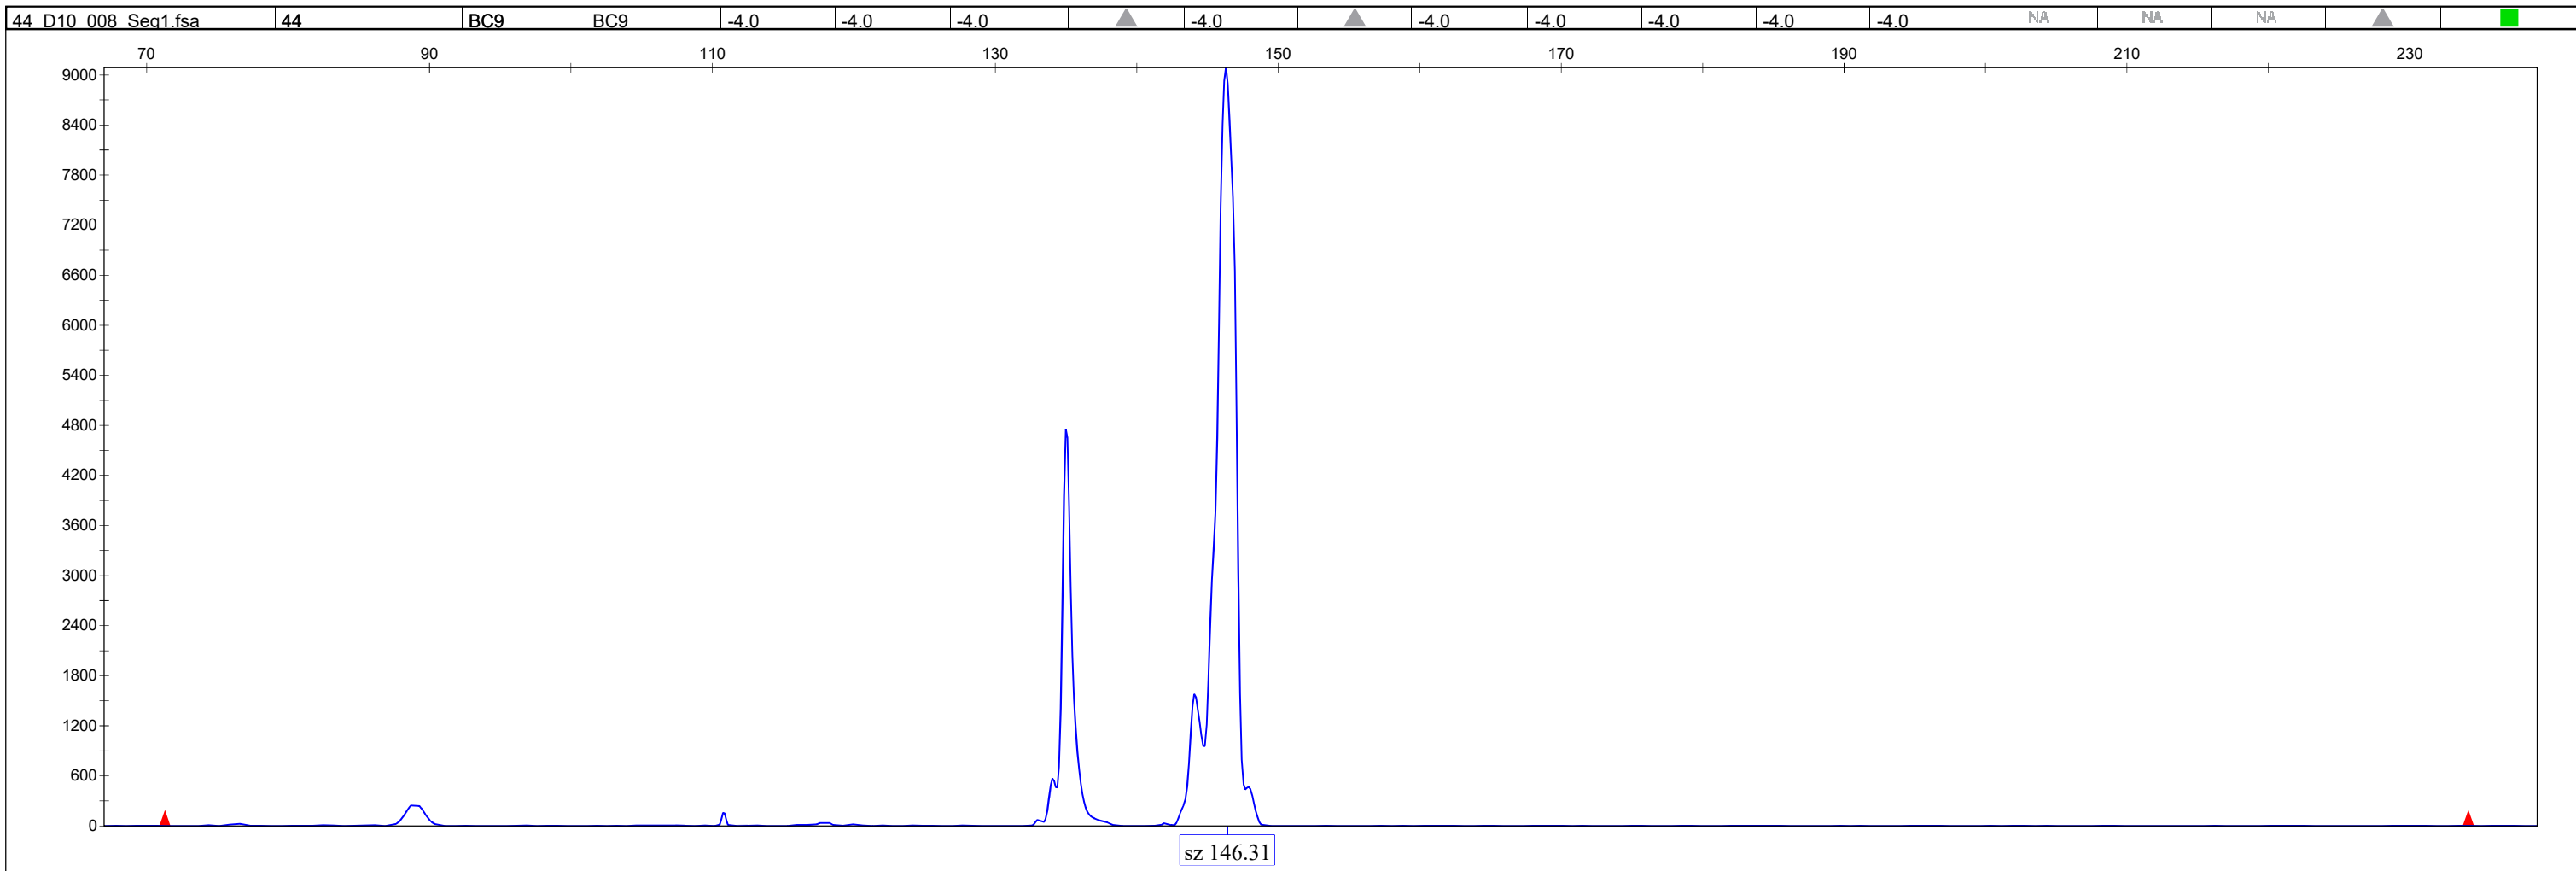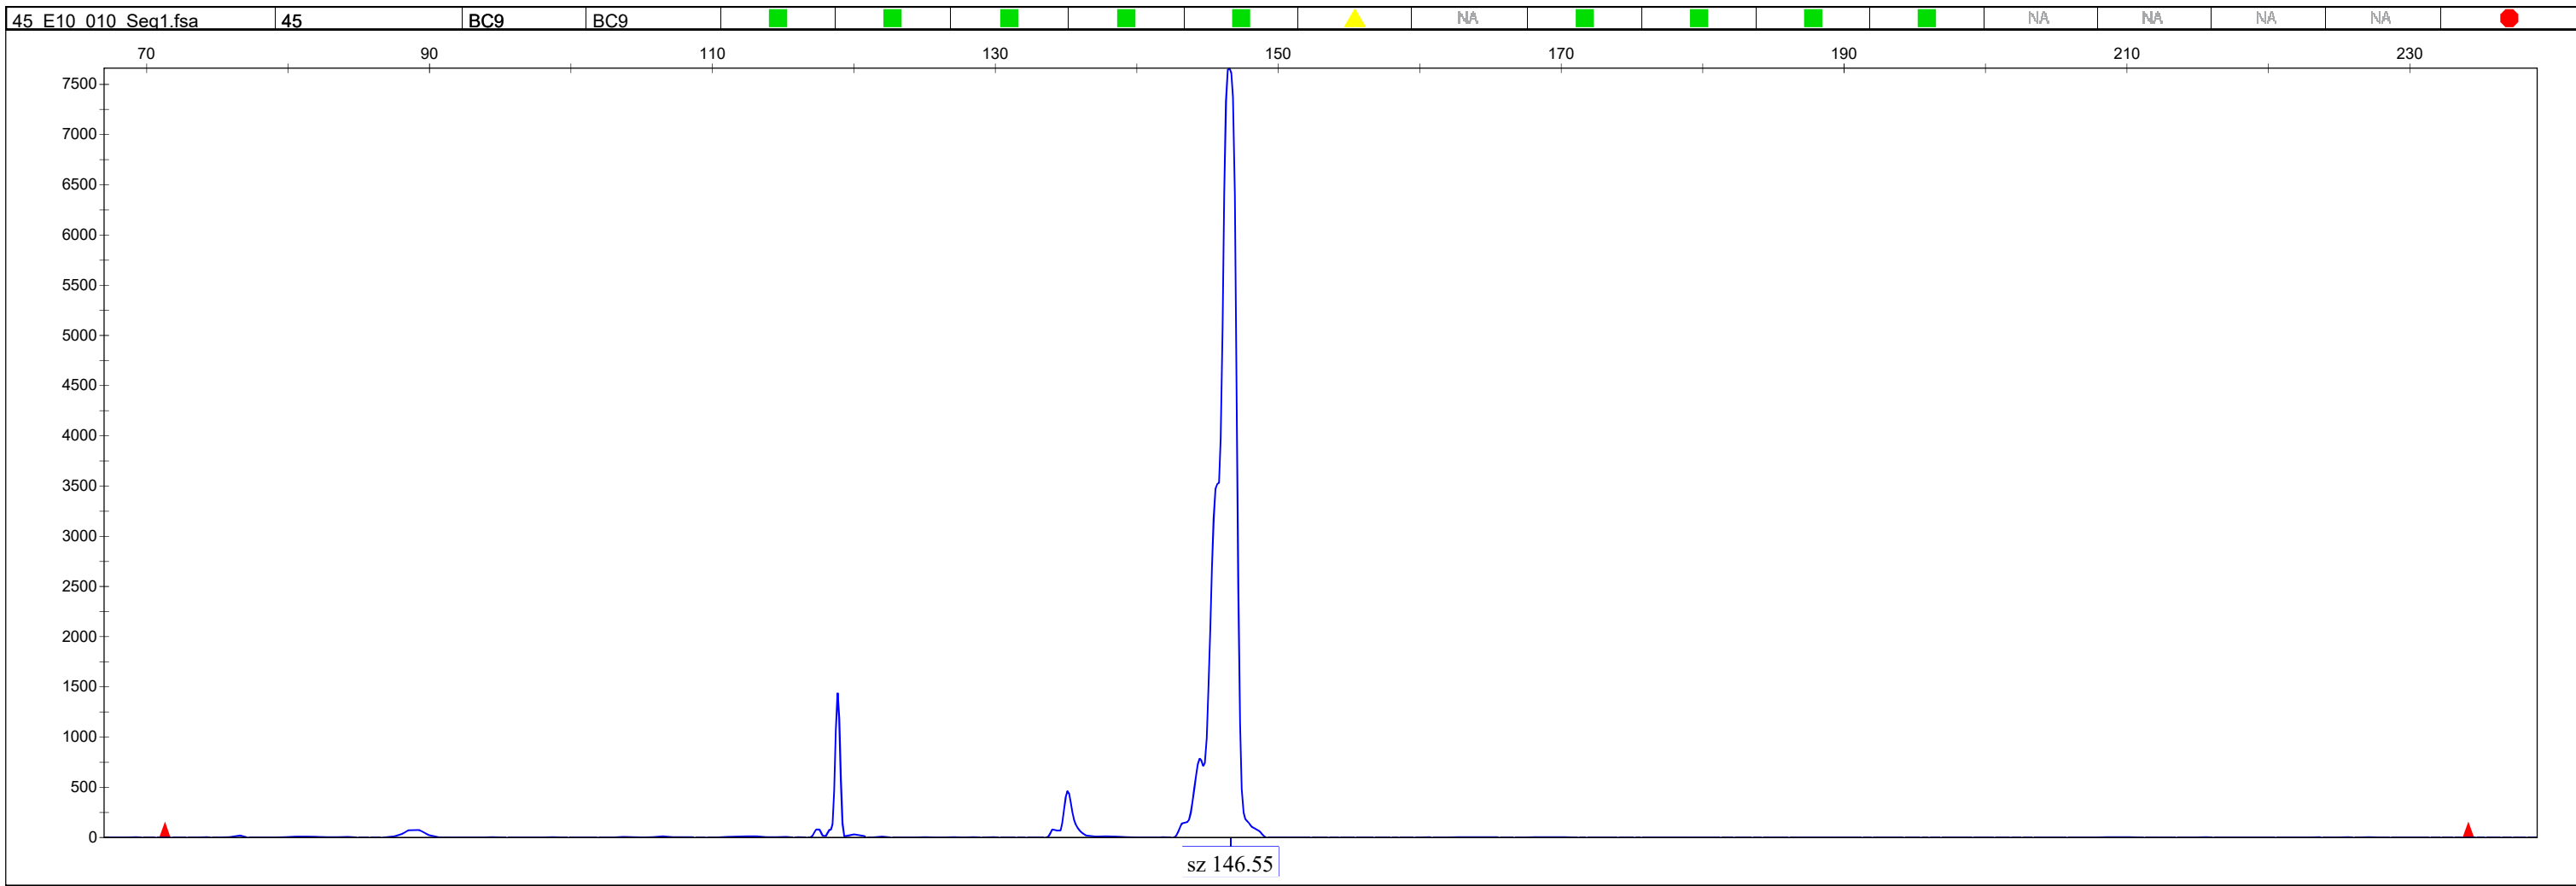

| Sample File         | Sample Name | Panel | Marker | OS   | SHP  | OBA  | SPA | SP   | BIN | PHR | LPH  | SPU  | AN   | BD   | DP | NB | CC | OVL | GQ |
|---------------------|-------------|-------|--------|------|------|------|-----|------|-----|-----|------|------|------|------|----|----|----|-----|----|
| 46_F10_012_Seq1.fsa | 46          | BC9   | BC9    | -4.0 | -4.0 | -4.0 |     | -4.0 |     |     | -4.0 | -4.0 | -4.0 | -4.0 |    | NA | NA | NA  |    |

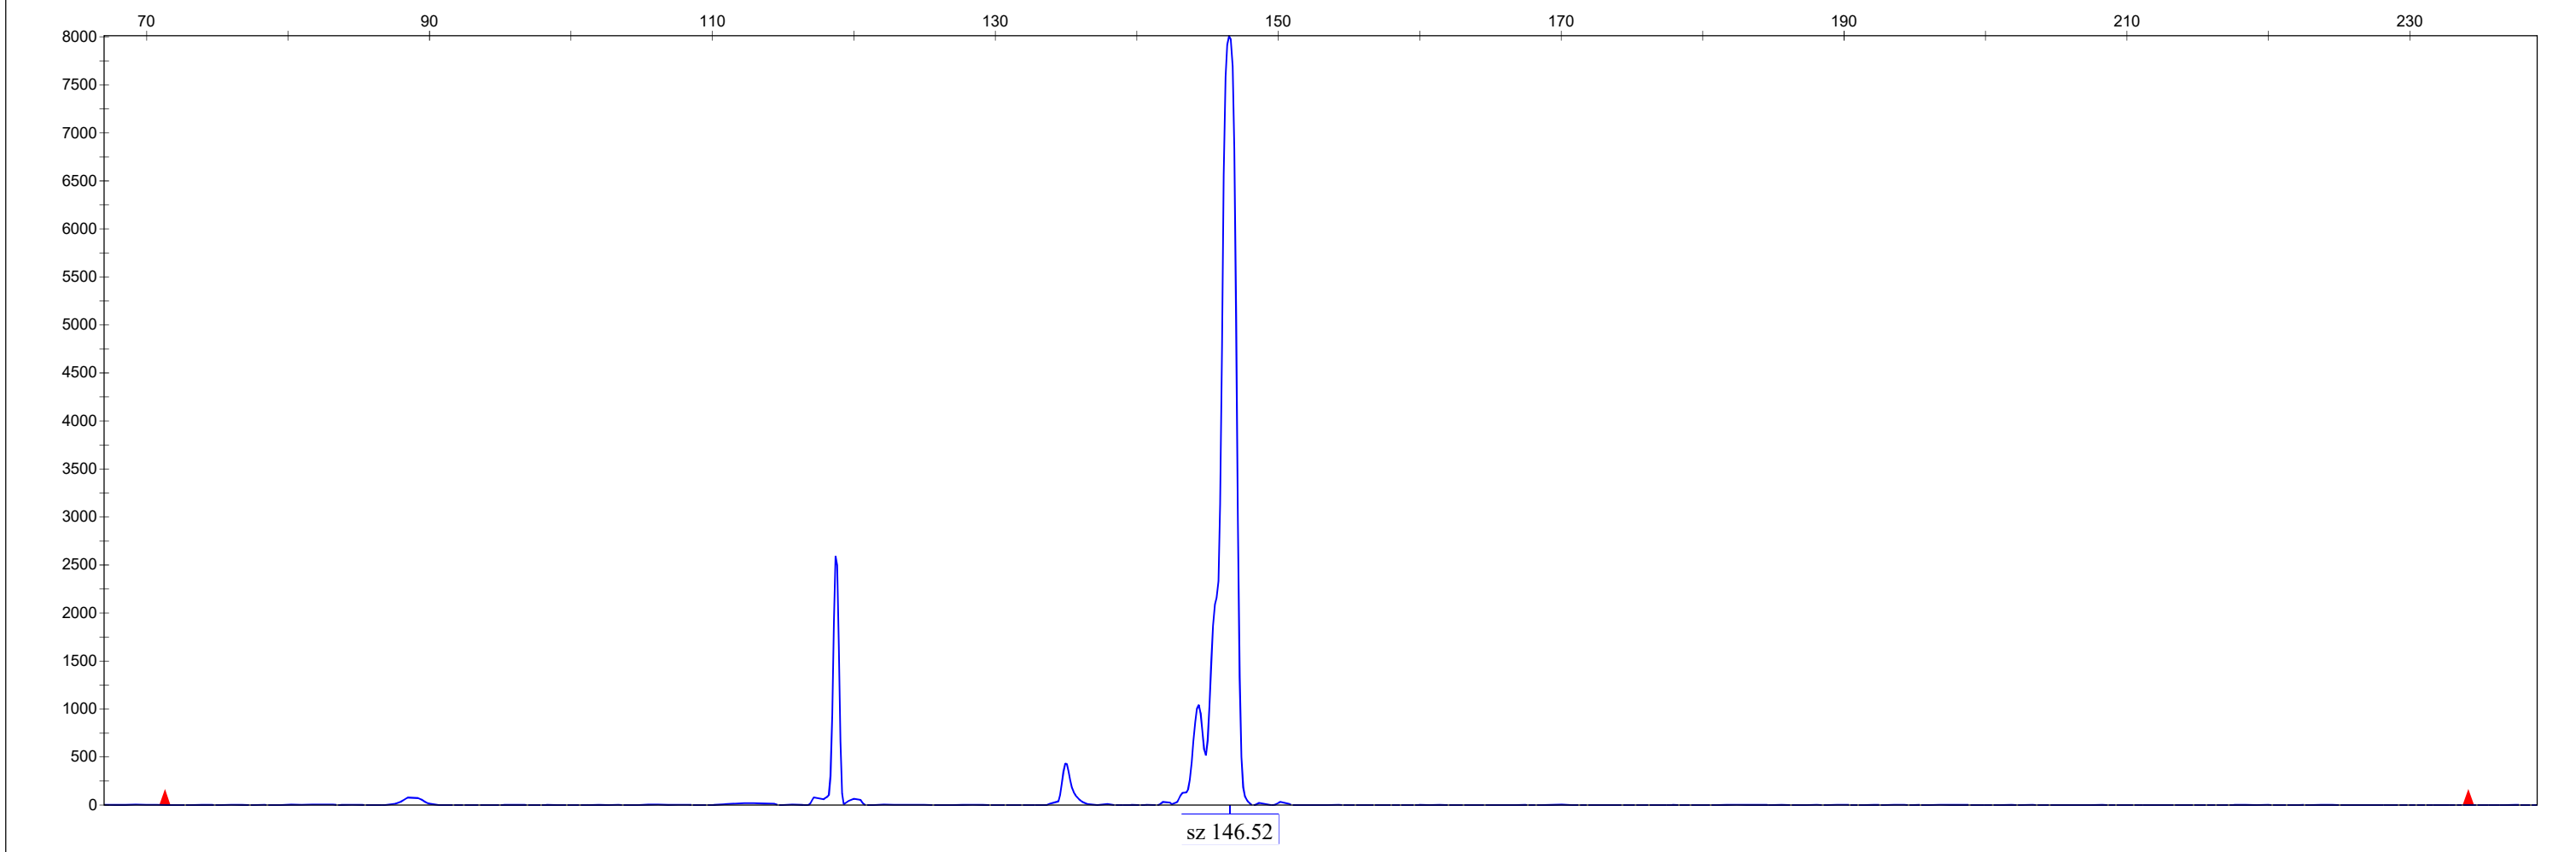

|                     |    |     |     |  |  |  |  |  |  |  |  |  |  |  |  |  |  |  |  |
|---------------------|----|-----|-----|--|--|--|--|--|--|--|--|--|--|--|--|--|--|--|--|
| 47_G10_014_Seq1.fsa | 47 | BC9 | BC9 |  |  |  |  |  |  |  |  |  |  |  |  |  |  |  |  |
|---------------------|----|-----|-----|--|--|--|--|--|--|--|--|--|--|--|--|--|--|--|--|

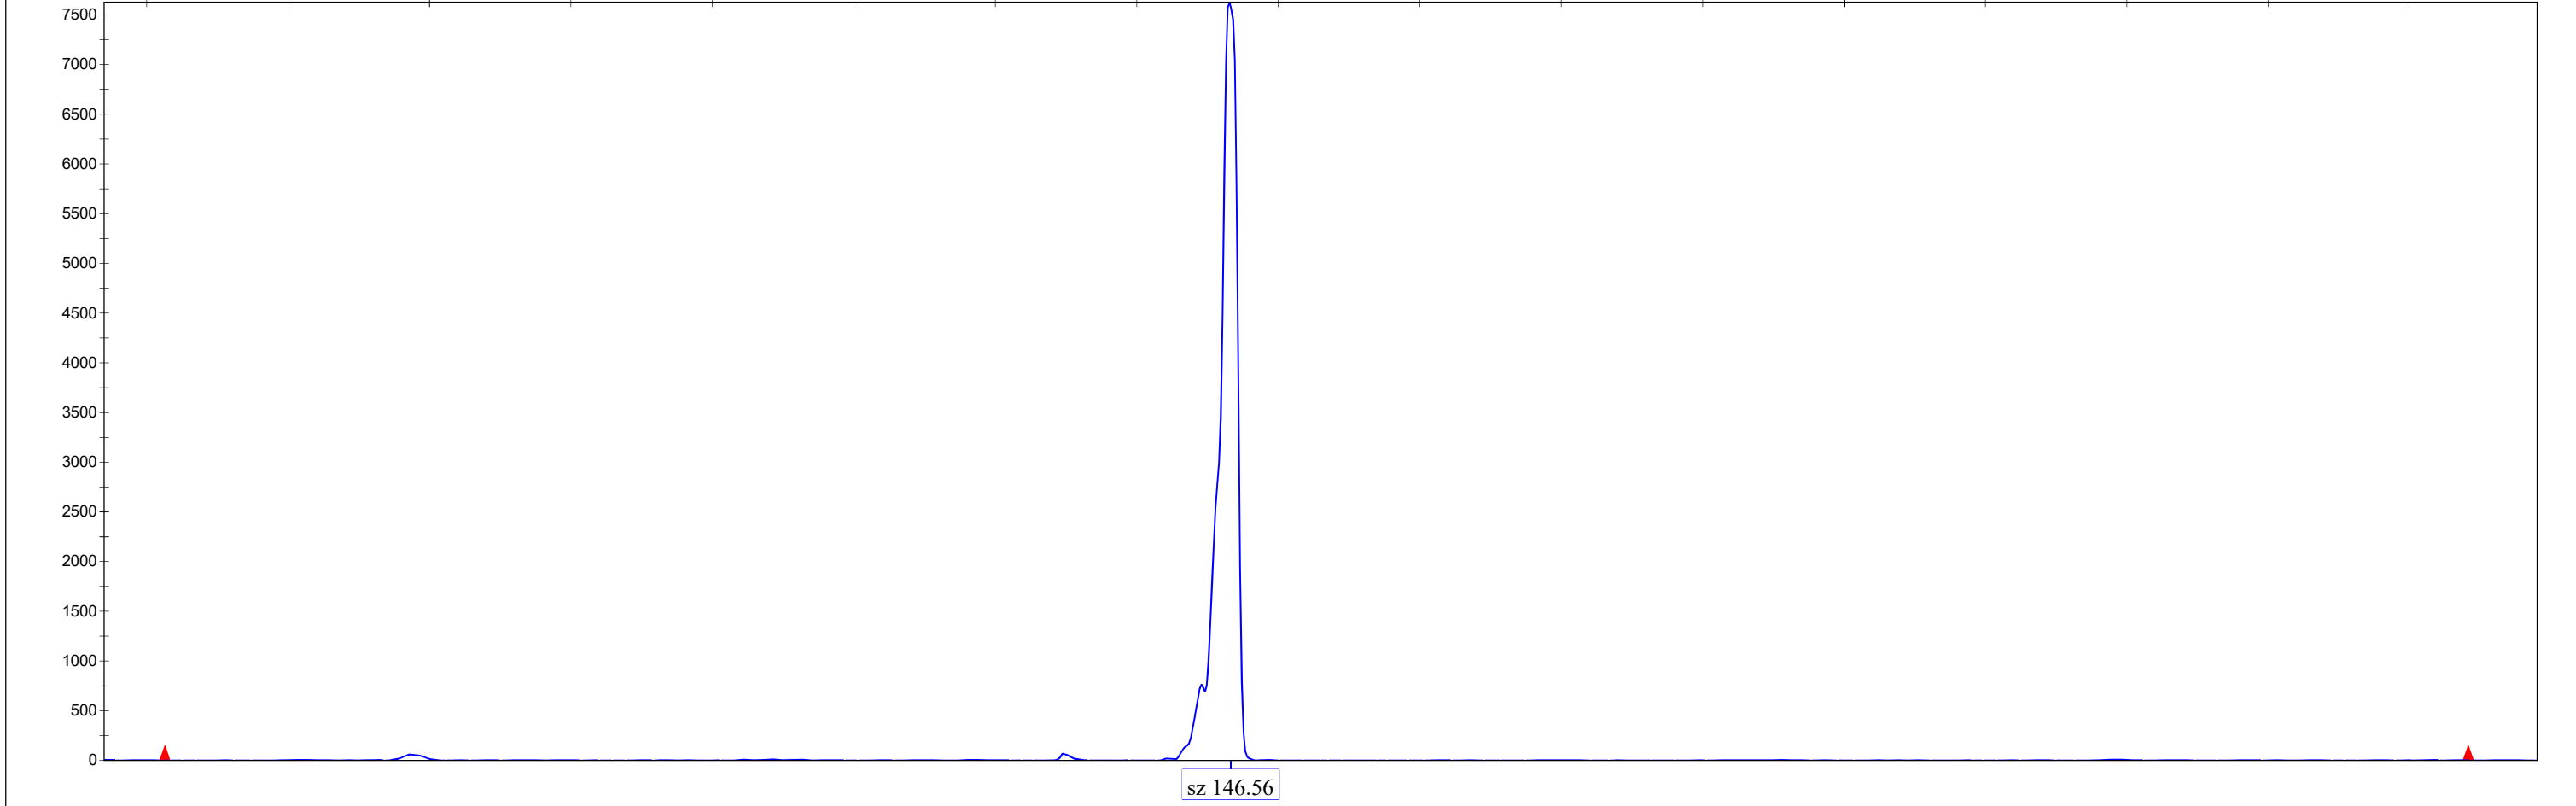

|                     |    |     |     |      |      |      |  |      |  |  |      |      |      |      |  |    |    |    |  |
|---------------------|----|-----|-----|------|------|------|--|------|--|--|------|------|------|------|--|----|----|----|--|
| 48_H10_016_Seq1.fsa | 48 | BC9 | BC9 | -4.0 | -4.0 | -4.0 |  | -4.0 |  |  | -4.0 | -4.0 | -4.0 | -4.0 |  | NA | NA | NA |  |
|---------------------|----|-----|-----|------|------|------|--|------|--|--|------|------|------|------|--|----|----|----|--|

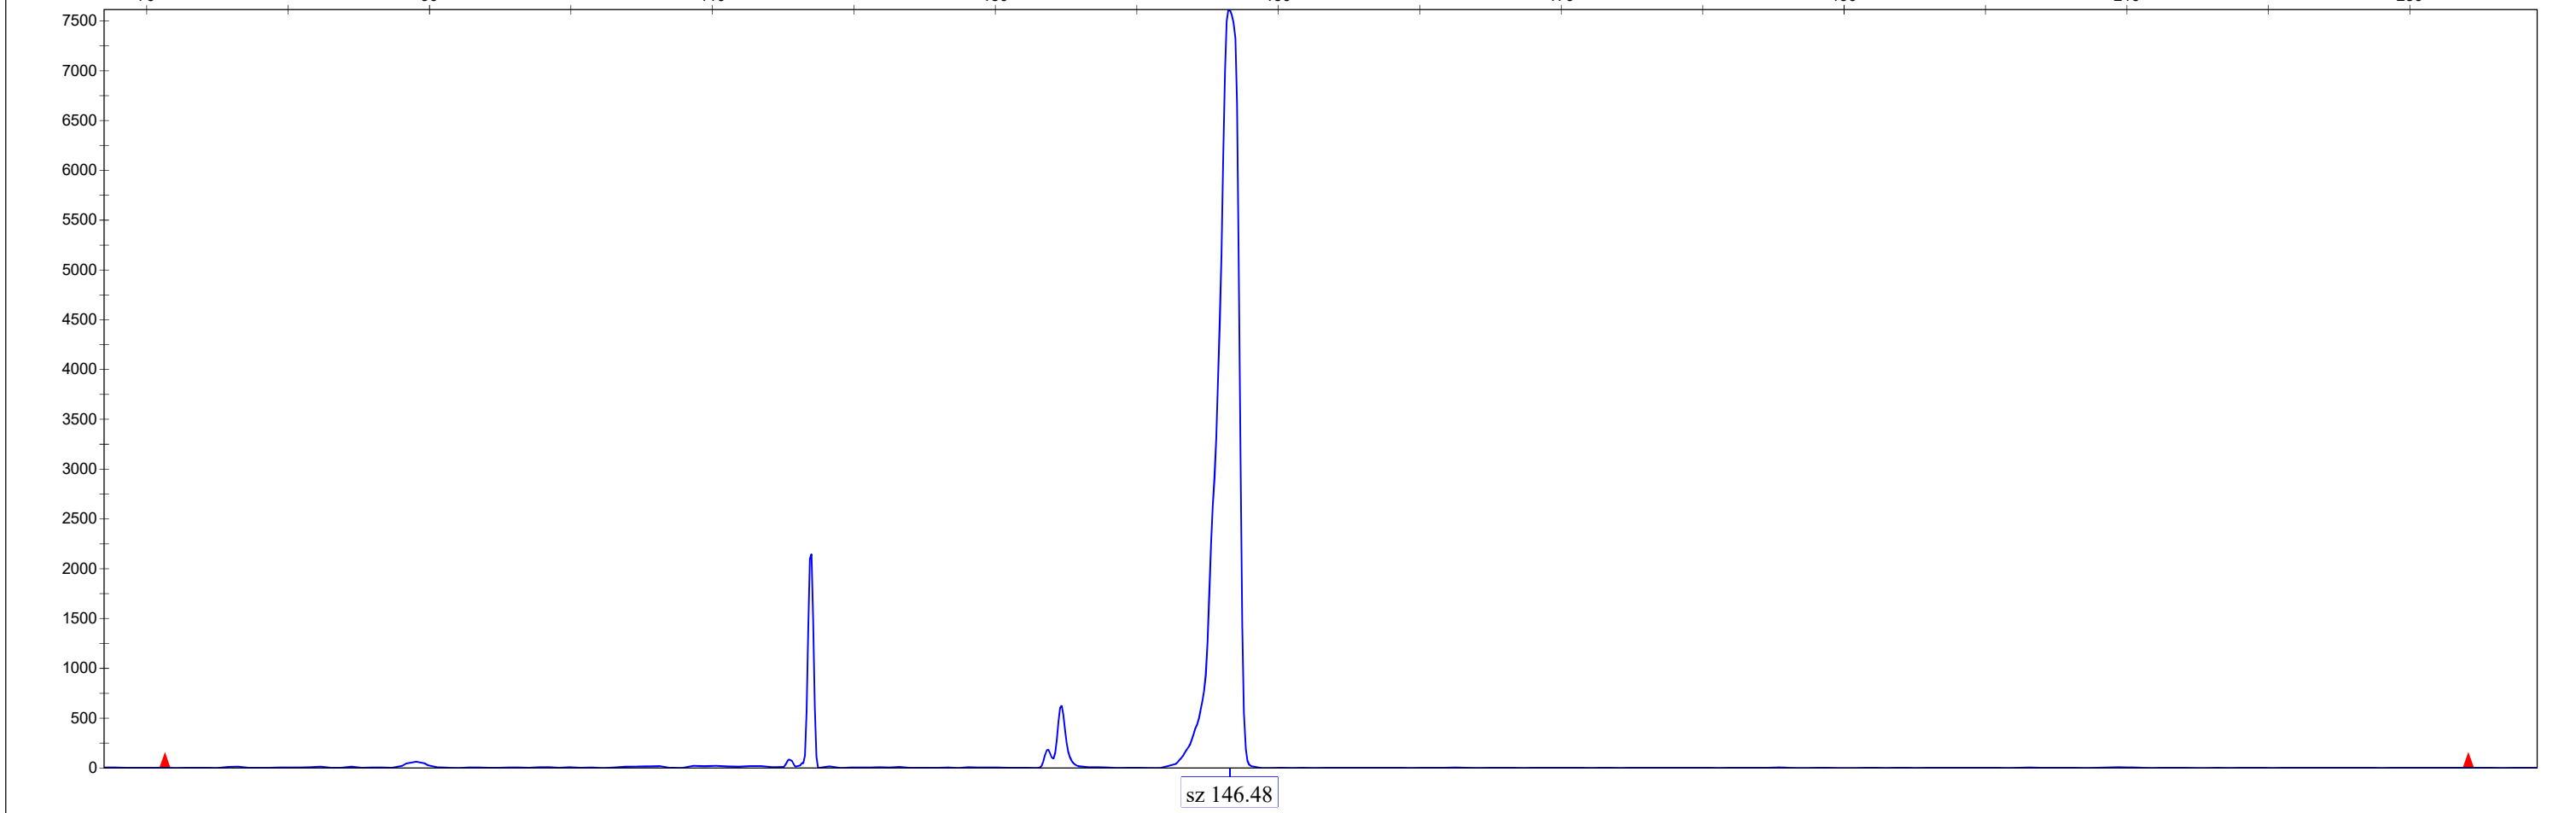

|                     |    |     |     |      |      |      |  |      |  |  |      |      |      |      |  |    |    |    |  |
|---------------------|----|-----|-----|------|------|------|--|------|--|--|------|------|------|------|--|----|----|----|--|
| 49_A11_001_Seq1.fsa | 49 | BC9 | BC9 | -4.0 | -4.0 | -4.0 |  | -4.0 |  |  | -4.0 | -4.0 | -4.0 | -4.0 |  | NA | NA | NA |  |
|---------------------|----|-----|-----|------|------|------|--|------|--|--|------|------|------|------|--|----|----|----|--|

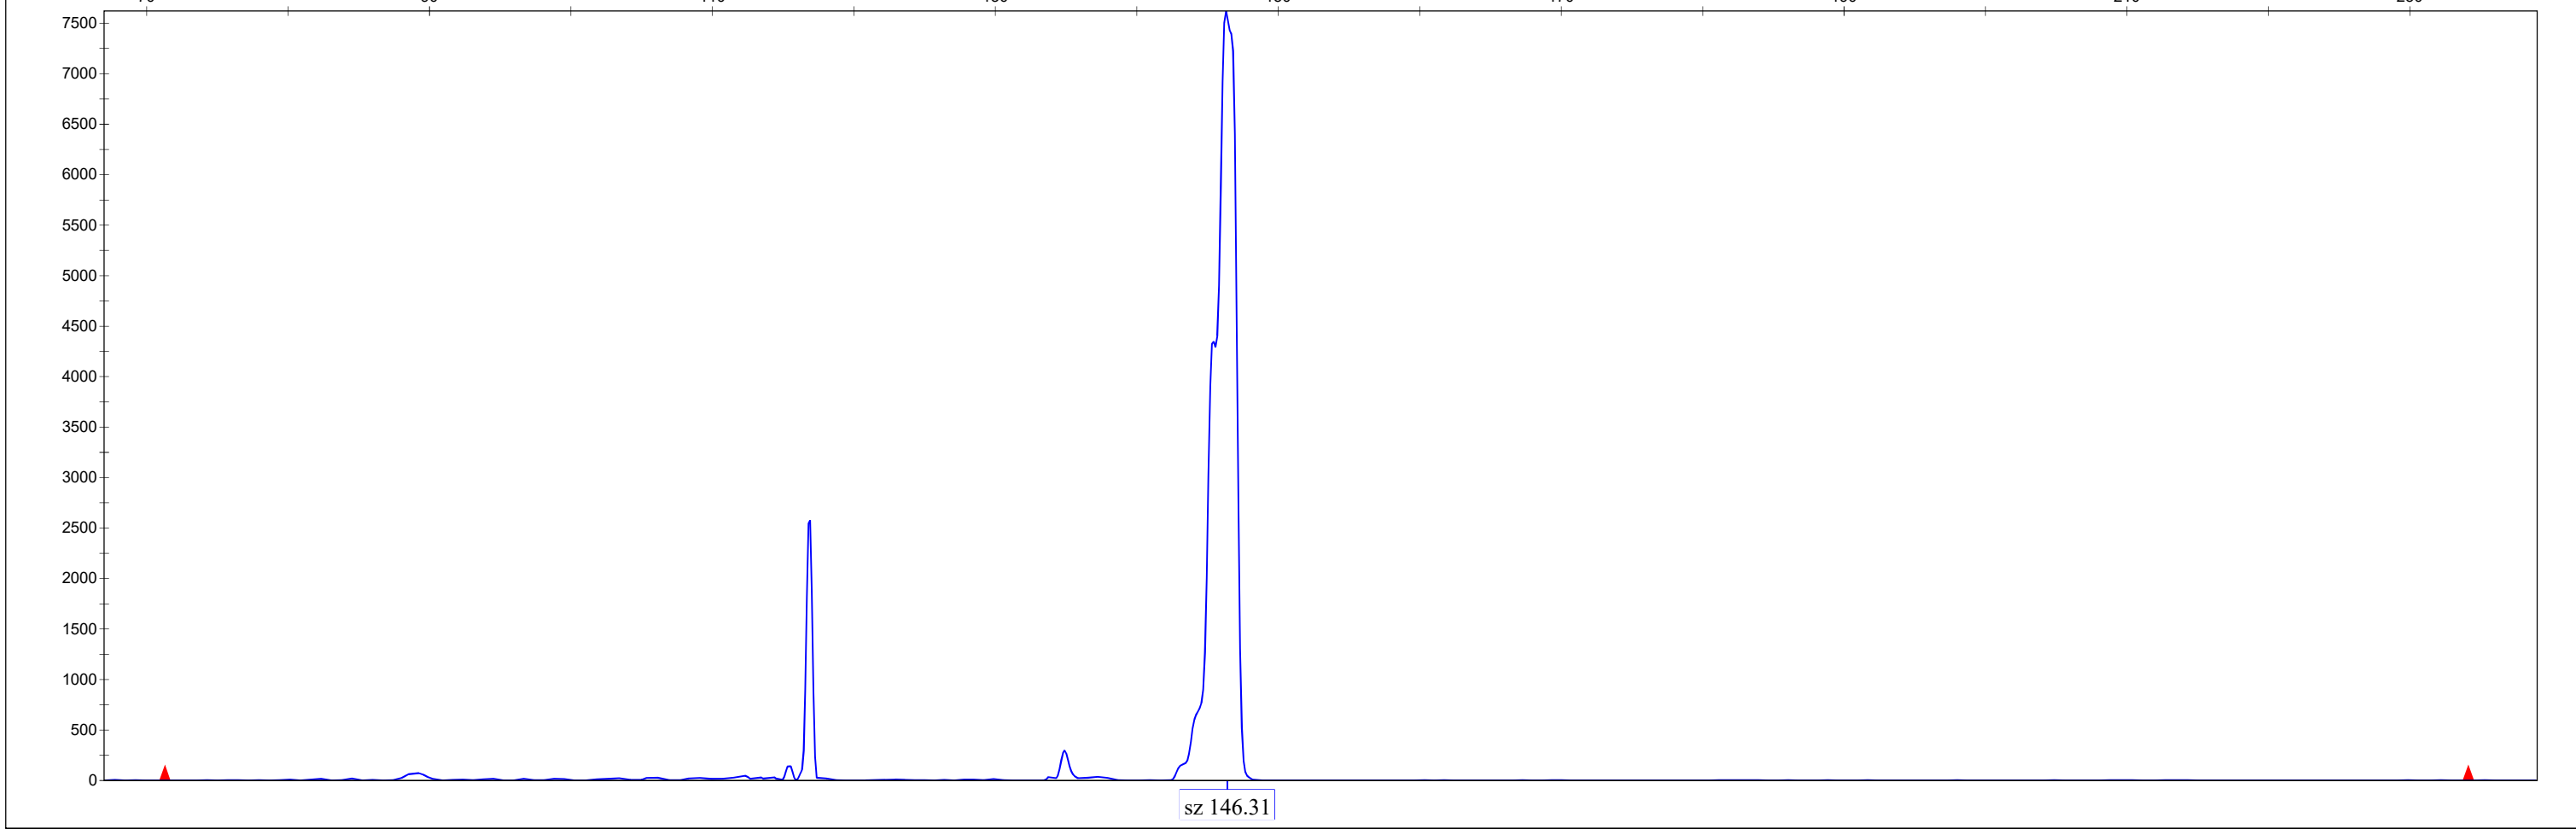

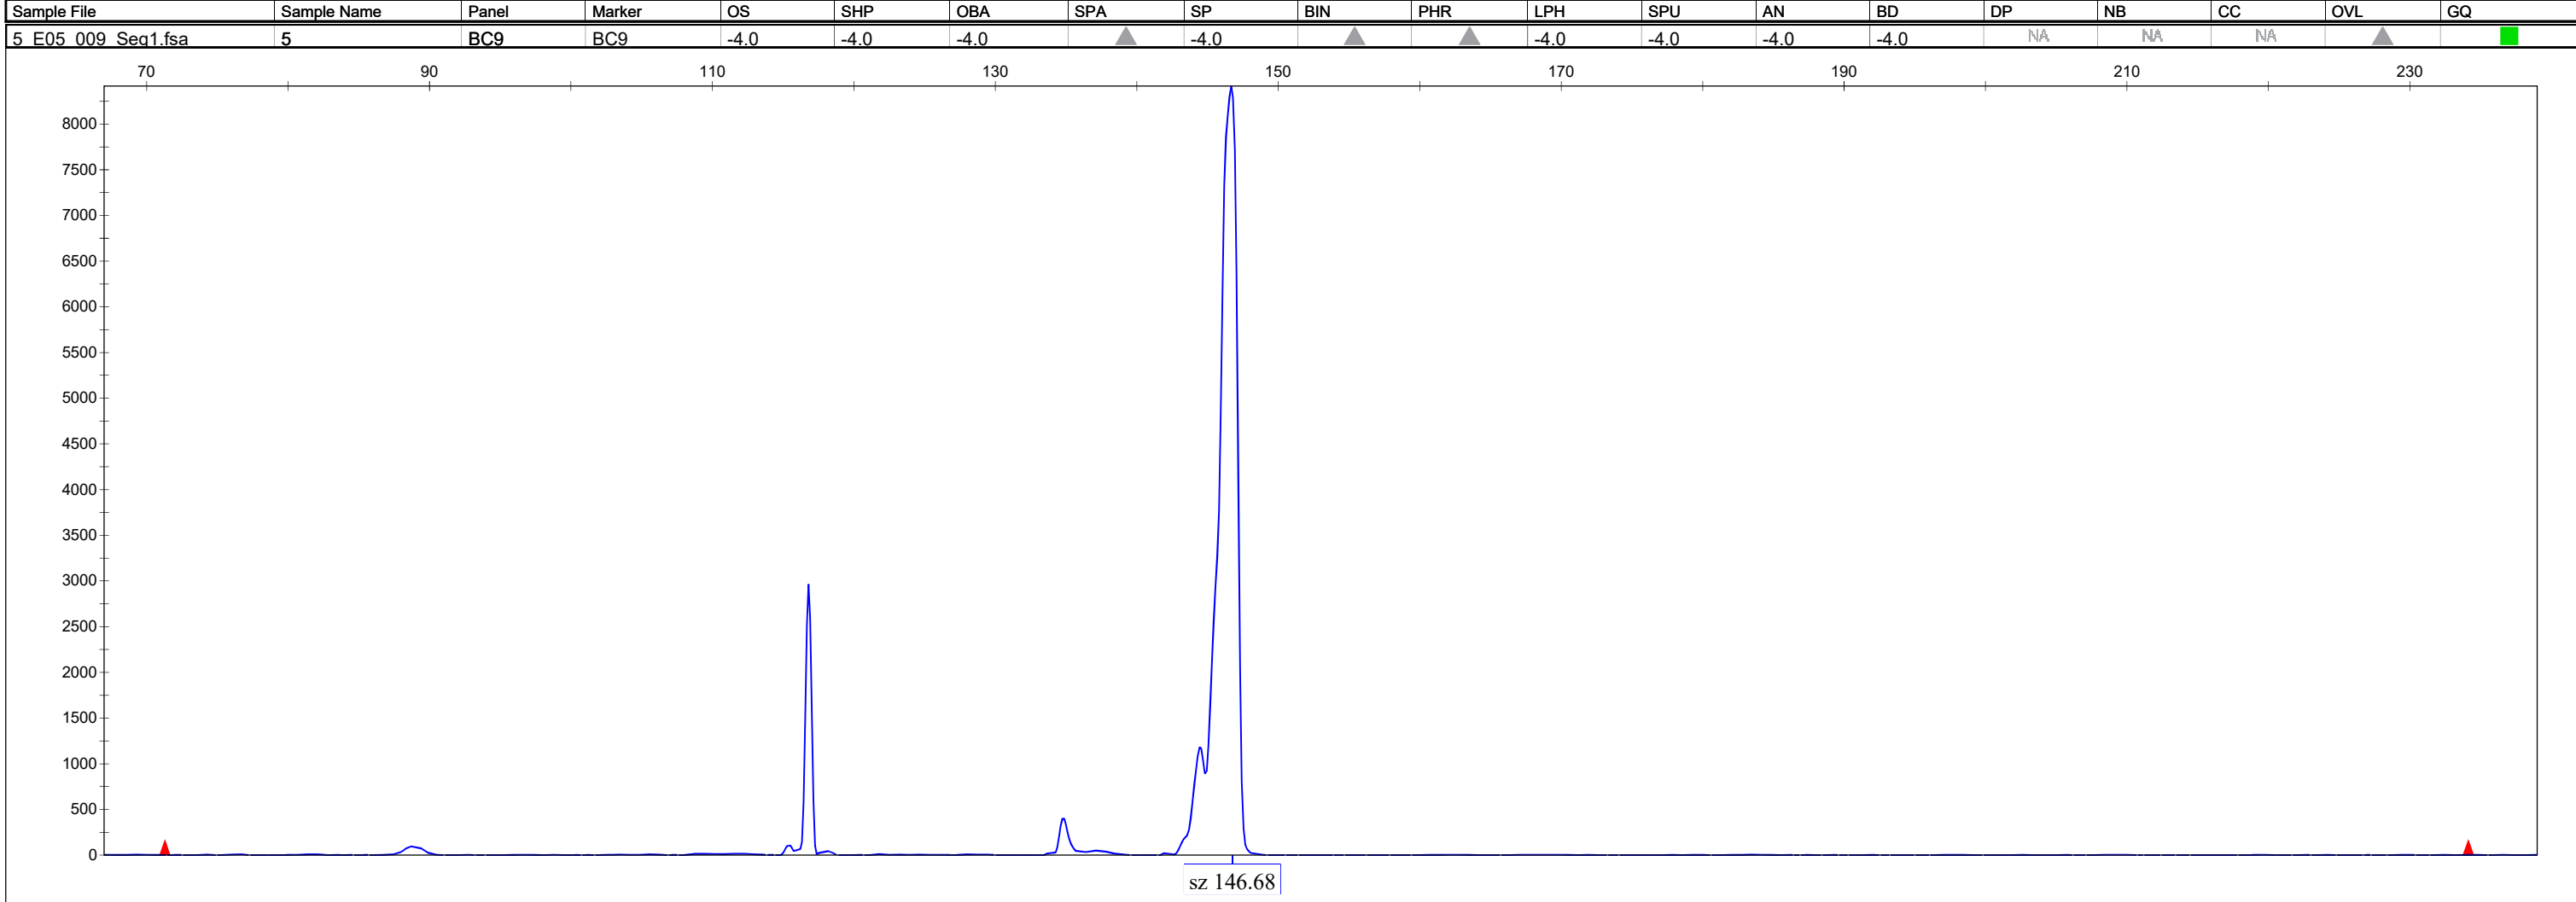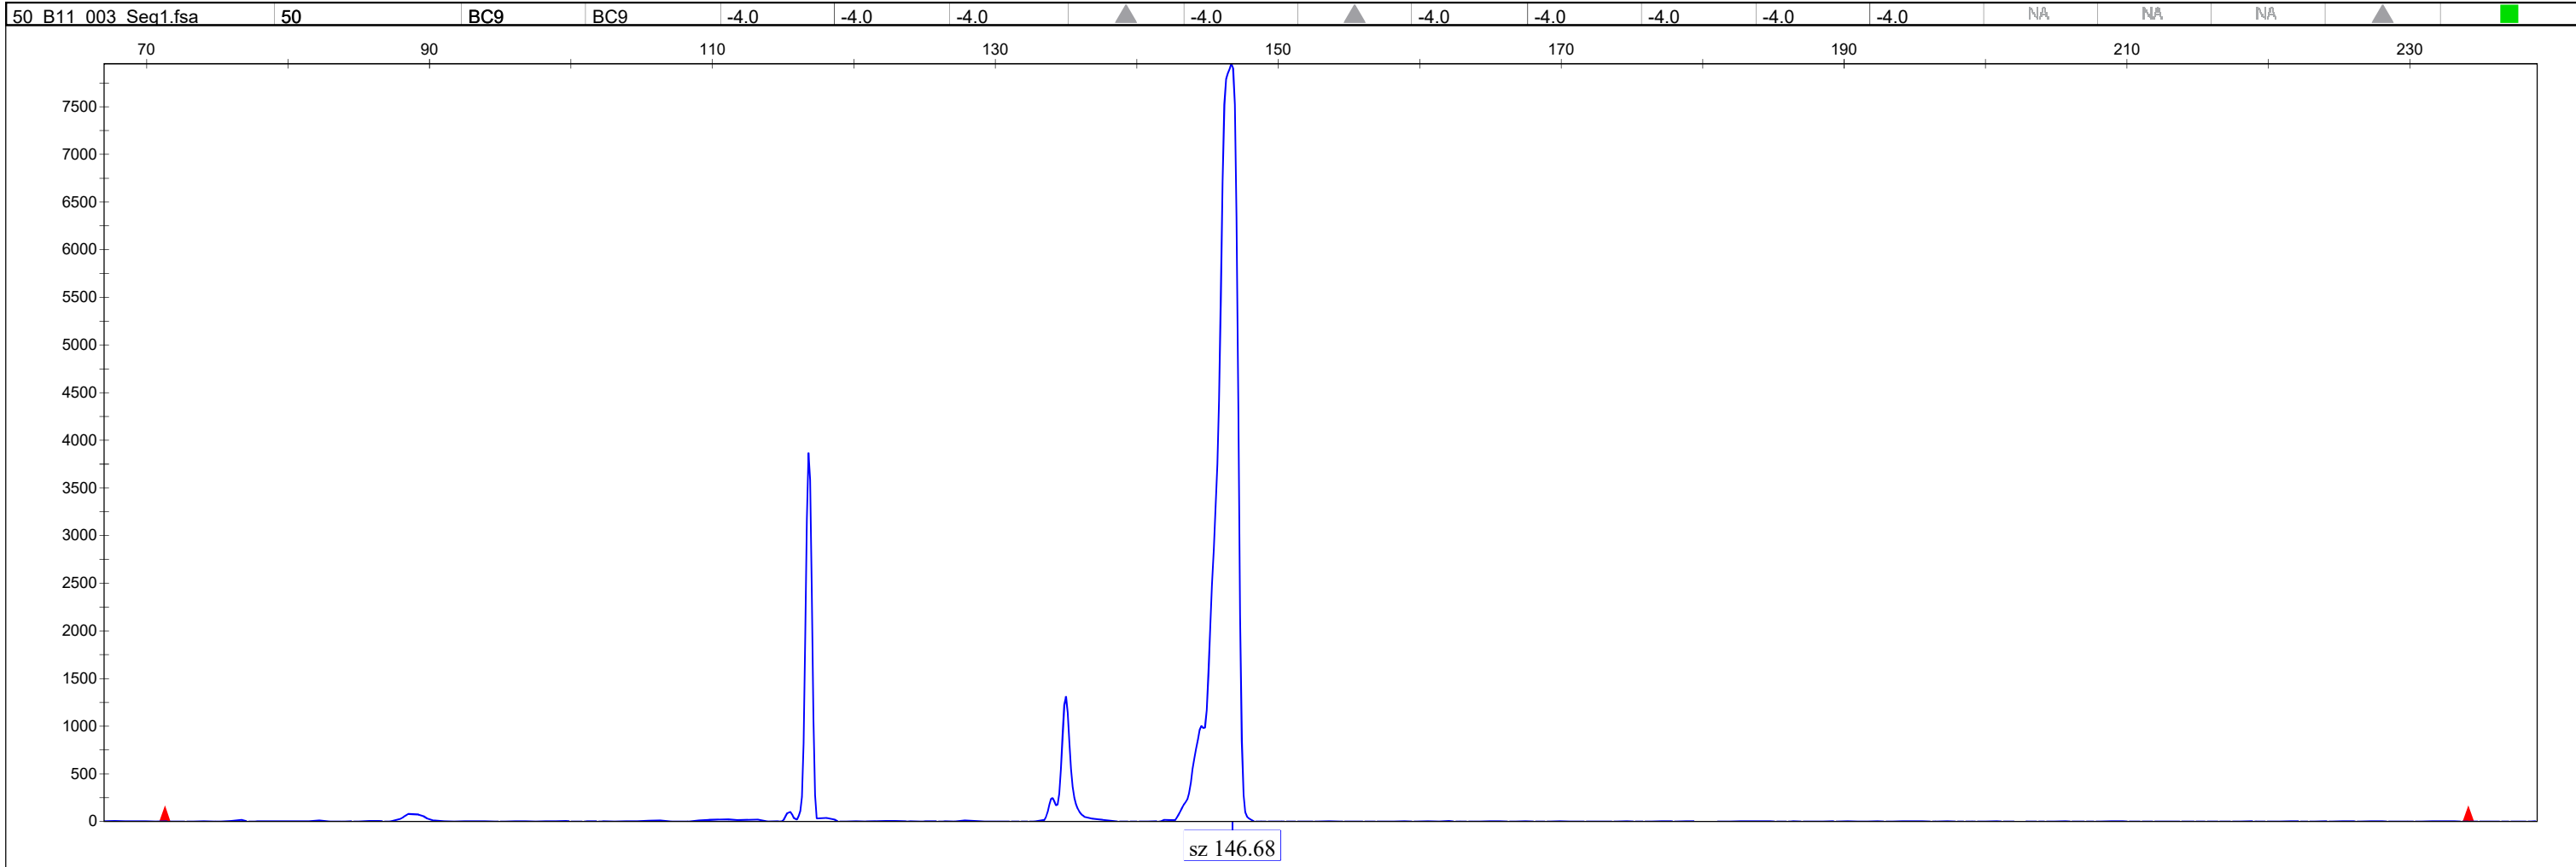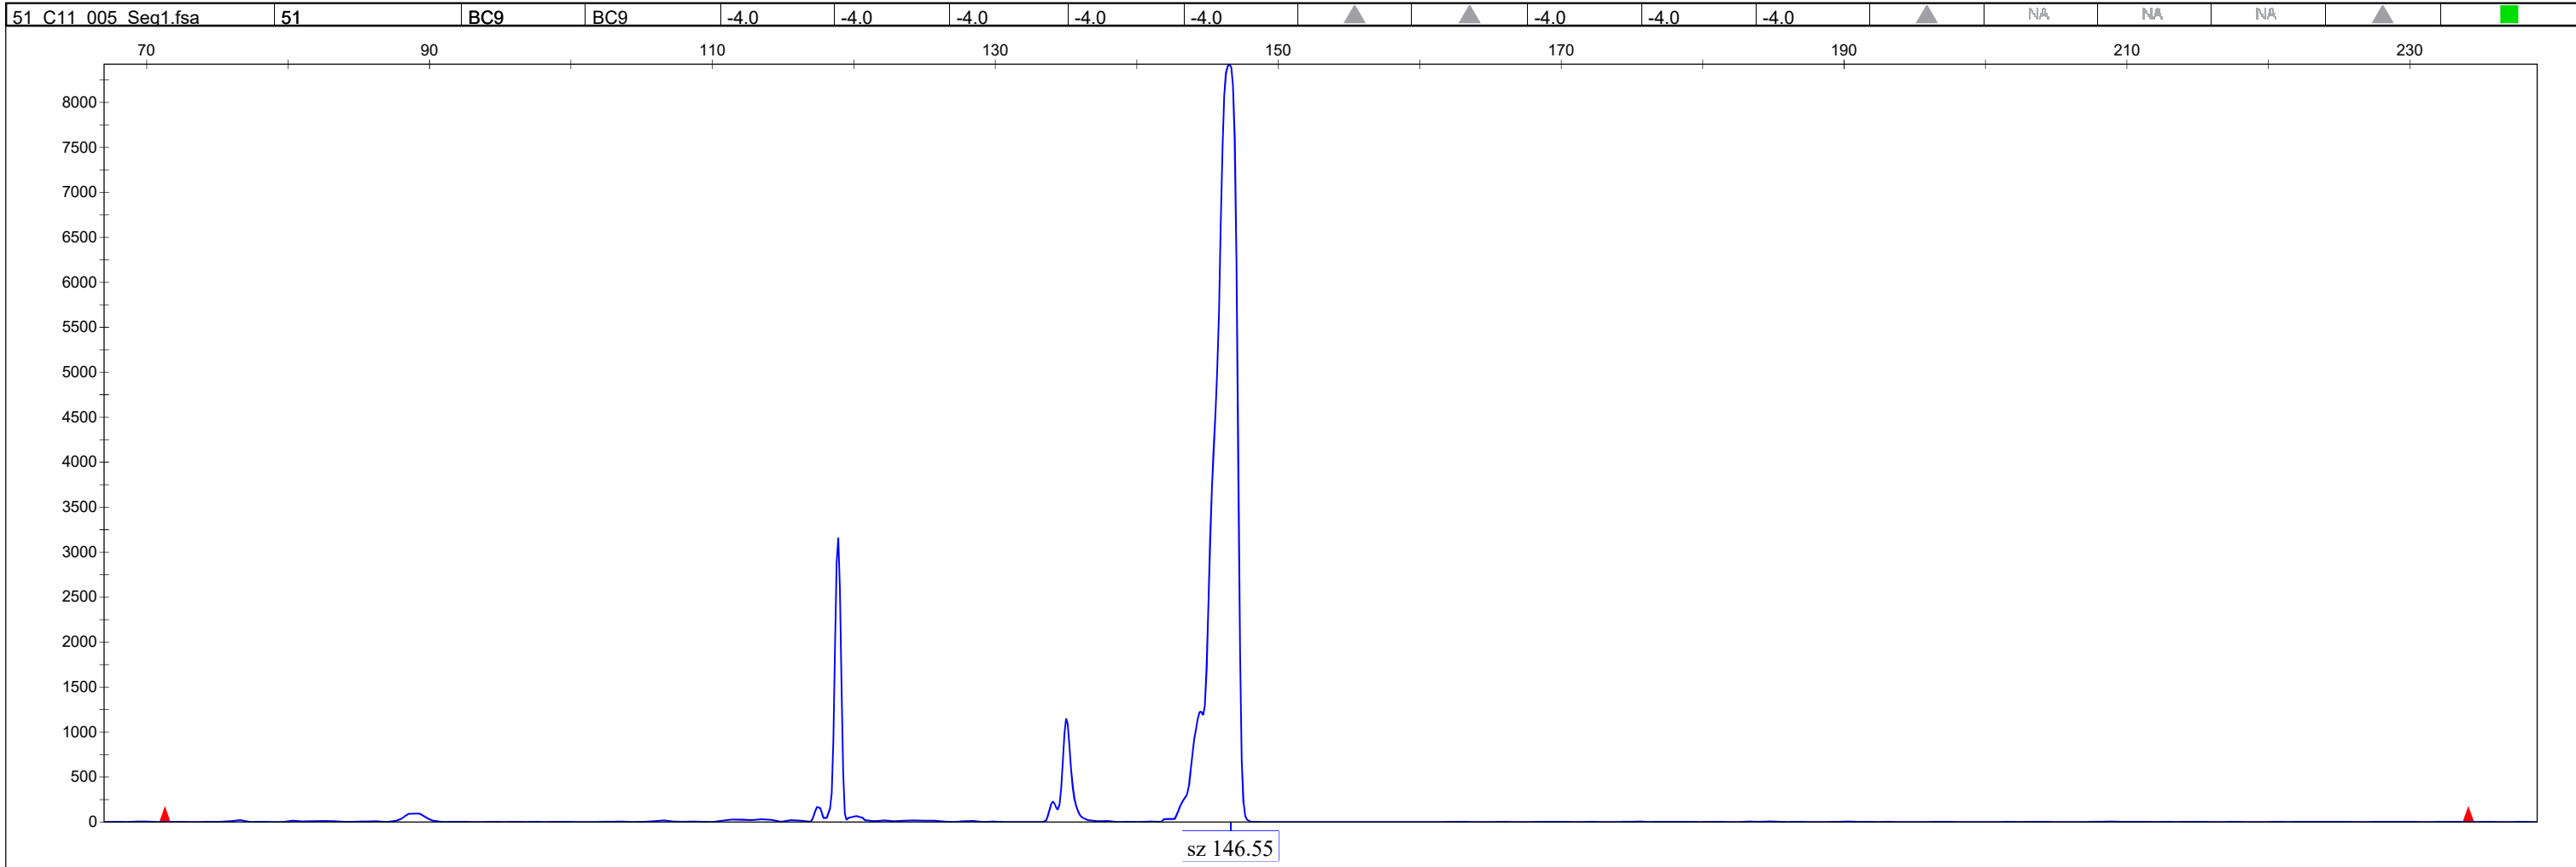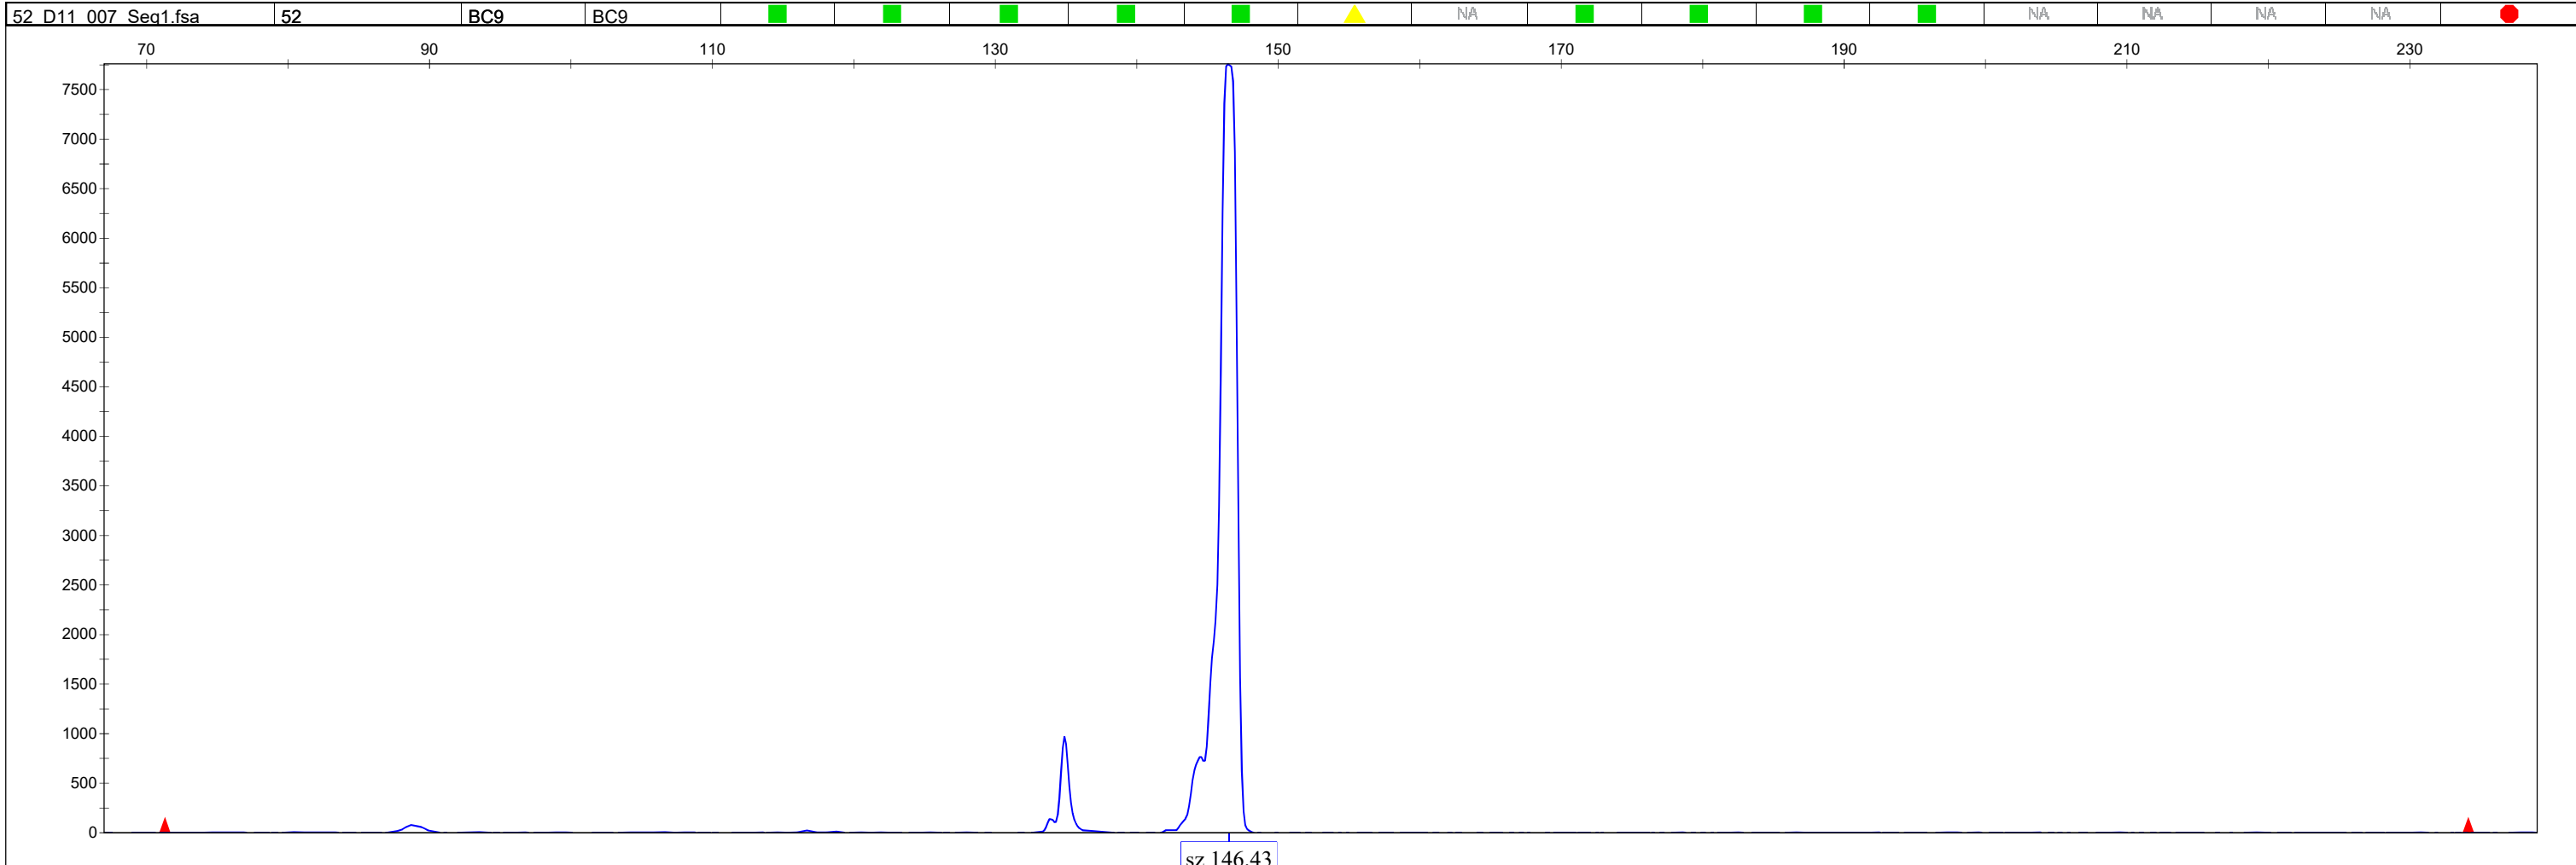

| Sample File         | Sample Name | Panel | Marker | OS   | SHP  | OBA  | SPA | SP   | BIN | PHR | LPH  | SPU  | AN   | BD | DP | NB | CC | OVL | GQ |
|---------------------|-------------|-------|--------|------|------|------|-----|------|-----|-----|------|------|------|----|----|----|----|-----|----|
| 53 E11 009 Seq1.fsa | 53          | BC9   | BC9    | -4.0 | -4.0 | -4.0 |     | -4.0 |     |     | -4.0 | -4.0 | -4.0 |    | NA | NA | NA |     |    |

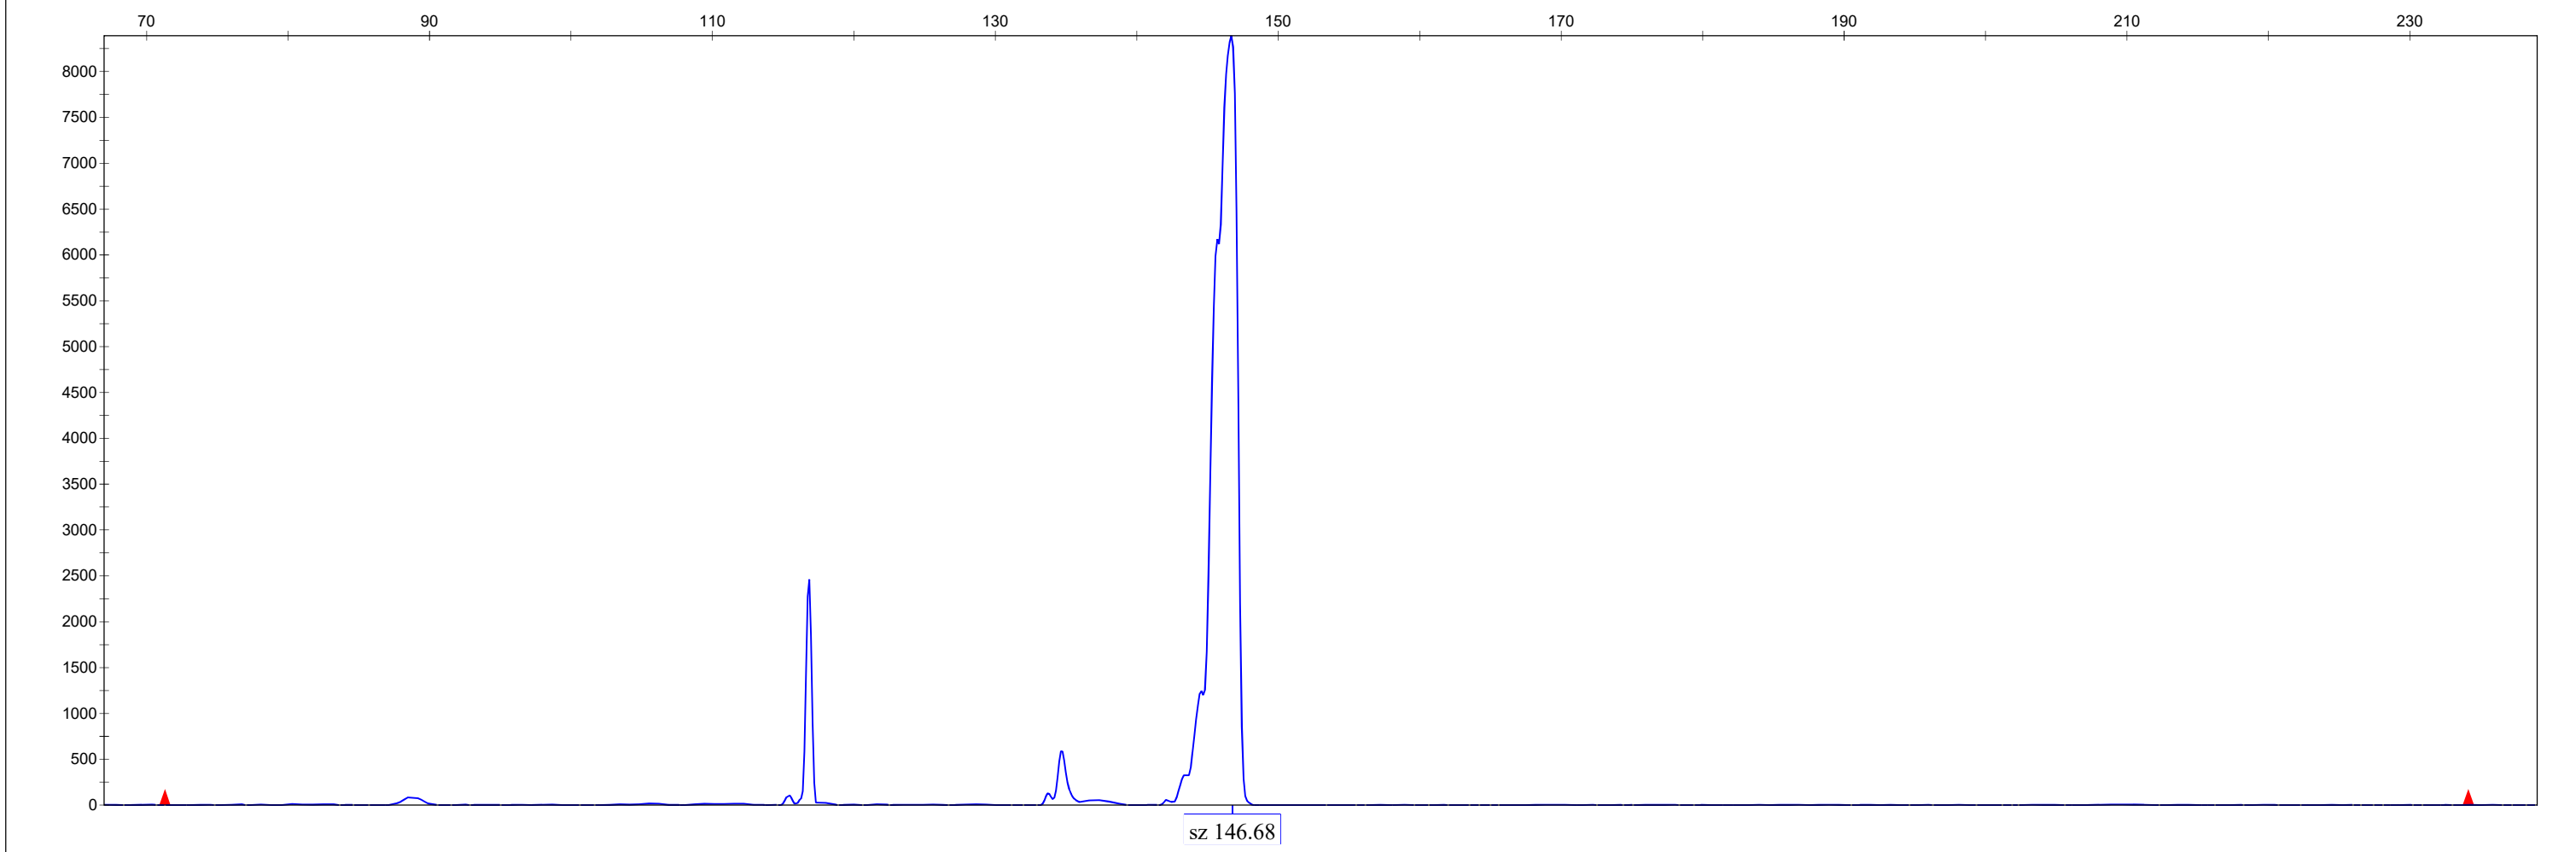

|                     |    |     |     |  |  |  |  |  |  |  |  |  |  |  |  |  |  |  |  |
|---------------------|----|-----|-----|--|--|--|--|--|--|--|--|--|--|--|--|--|--|--|--|
| 54 F11 011 Seq1.fsa | 54 | BC9 | BC9 |  |  |  |  |  |  |  |  |  |  |  |  |  |  |  |  |
|---------------------|----|-----|-----|--|--|--|--|--|--|--|--|--|--|--|--|--|--|--|--|

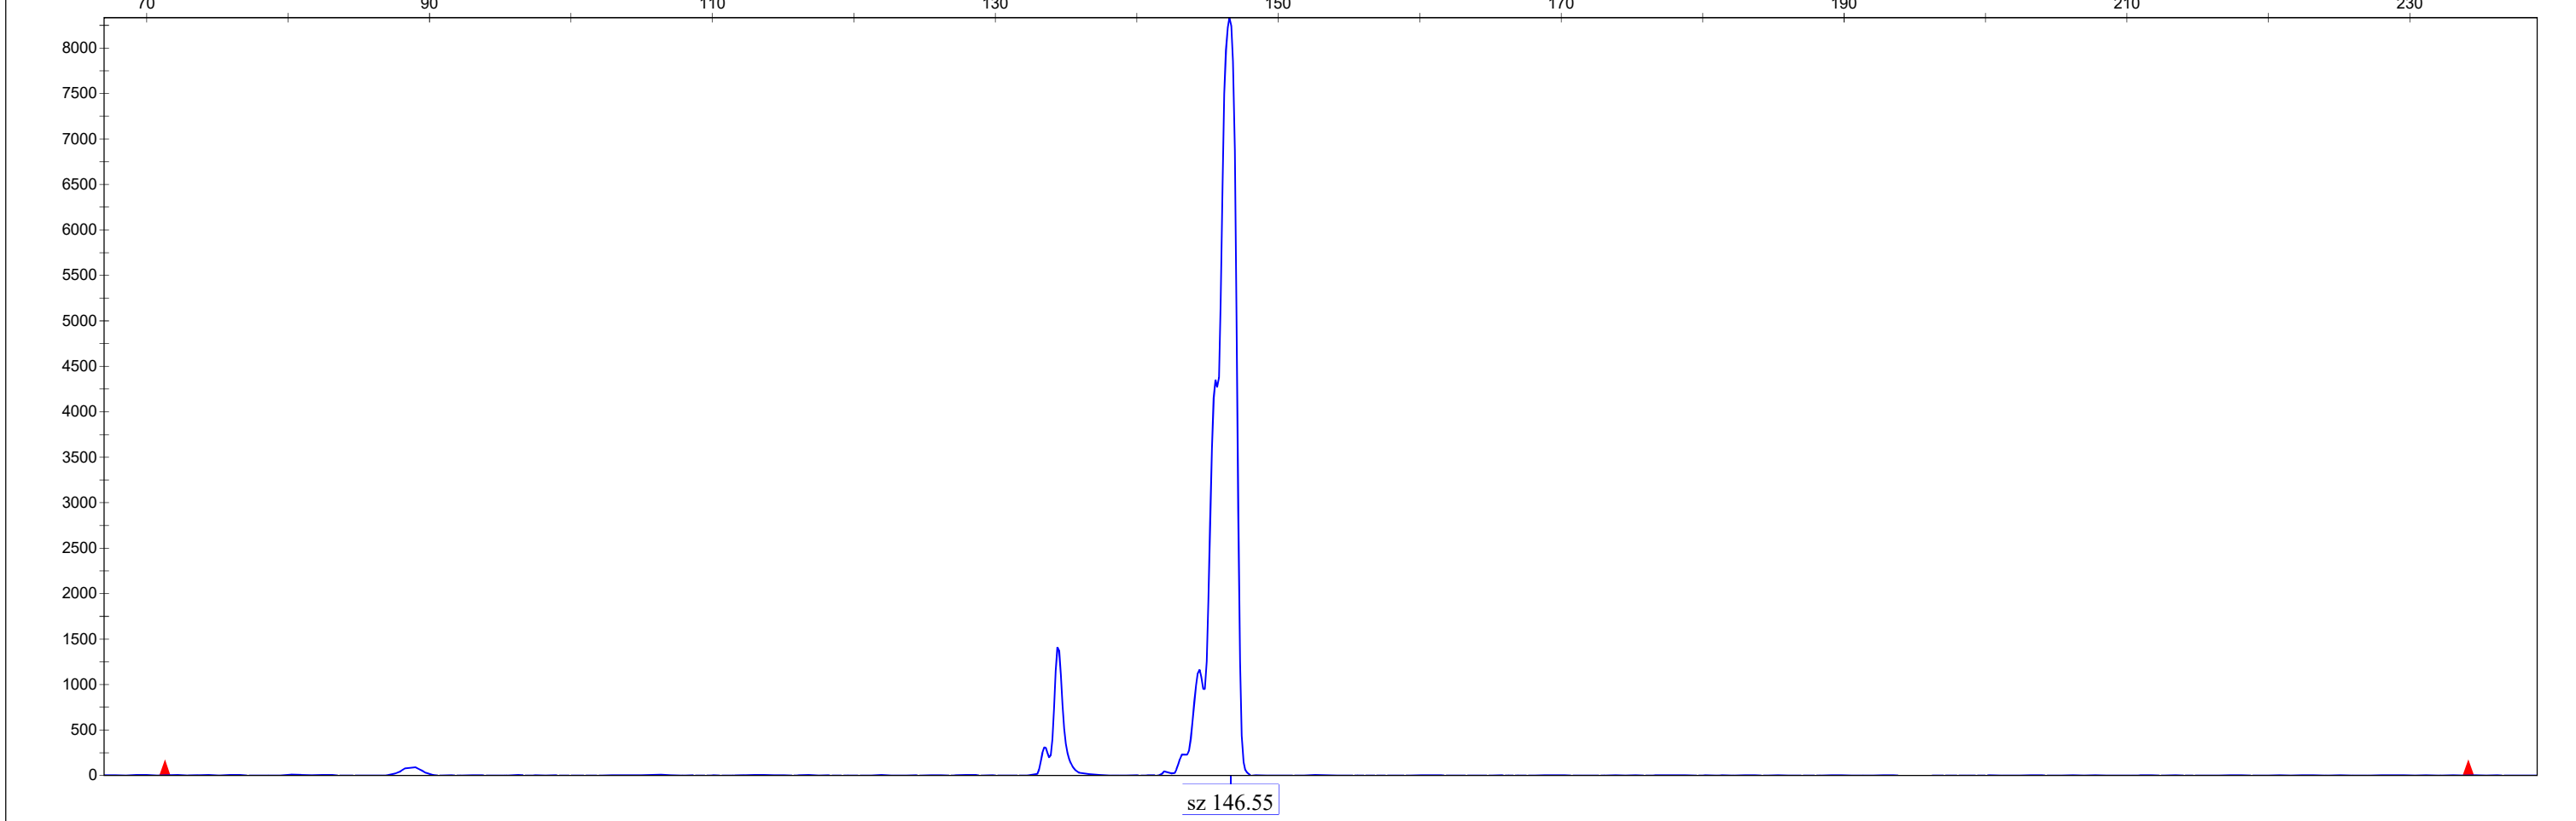

|                     |    |     |     |  |  |  |  |  |  |  |  |  |  |  |  |  |  |  |  |
|---------------------|----|-----|-----|--|--|--|--|--|--|--|--|--|--|--|--|--|--|--|--|
| 55 G11 013 Seq1.fsa | 55 | BC9 | BC9 |  |  |  |  |  |  |  |  |  |  |  |  |  |  |  |  |
|---------------------|----|-----|-----|--|--|--|--|--|--|--|--|--|--|--|--|--|--|--|--|

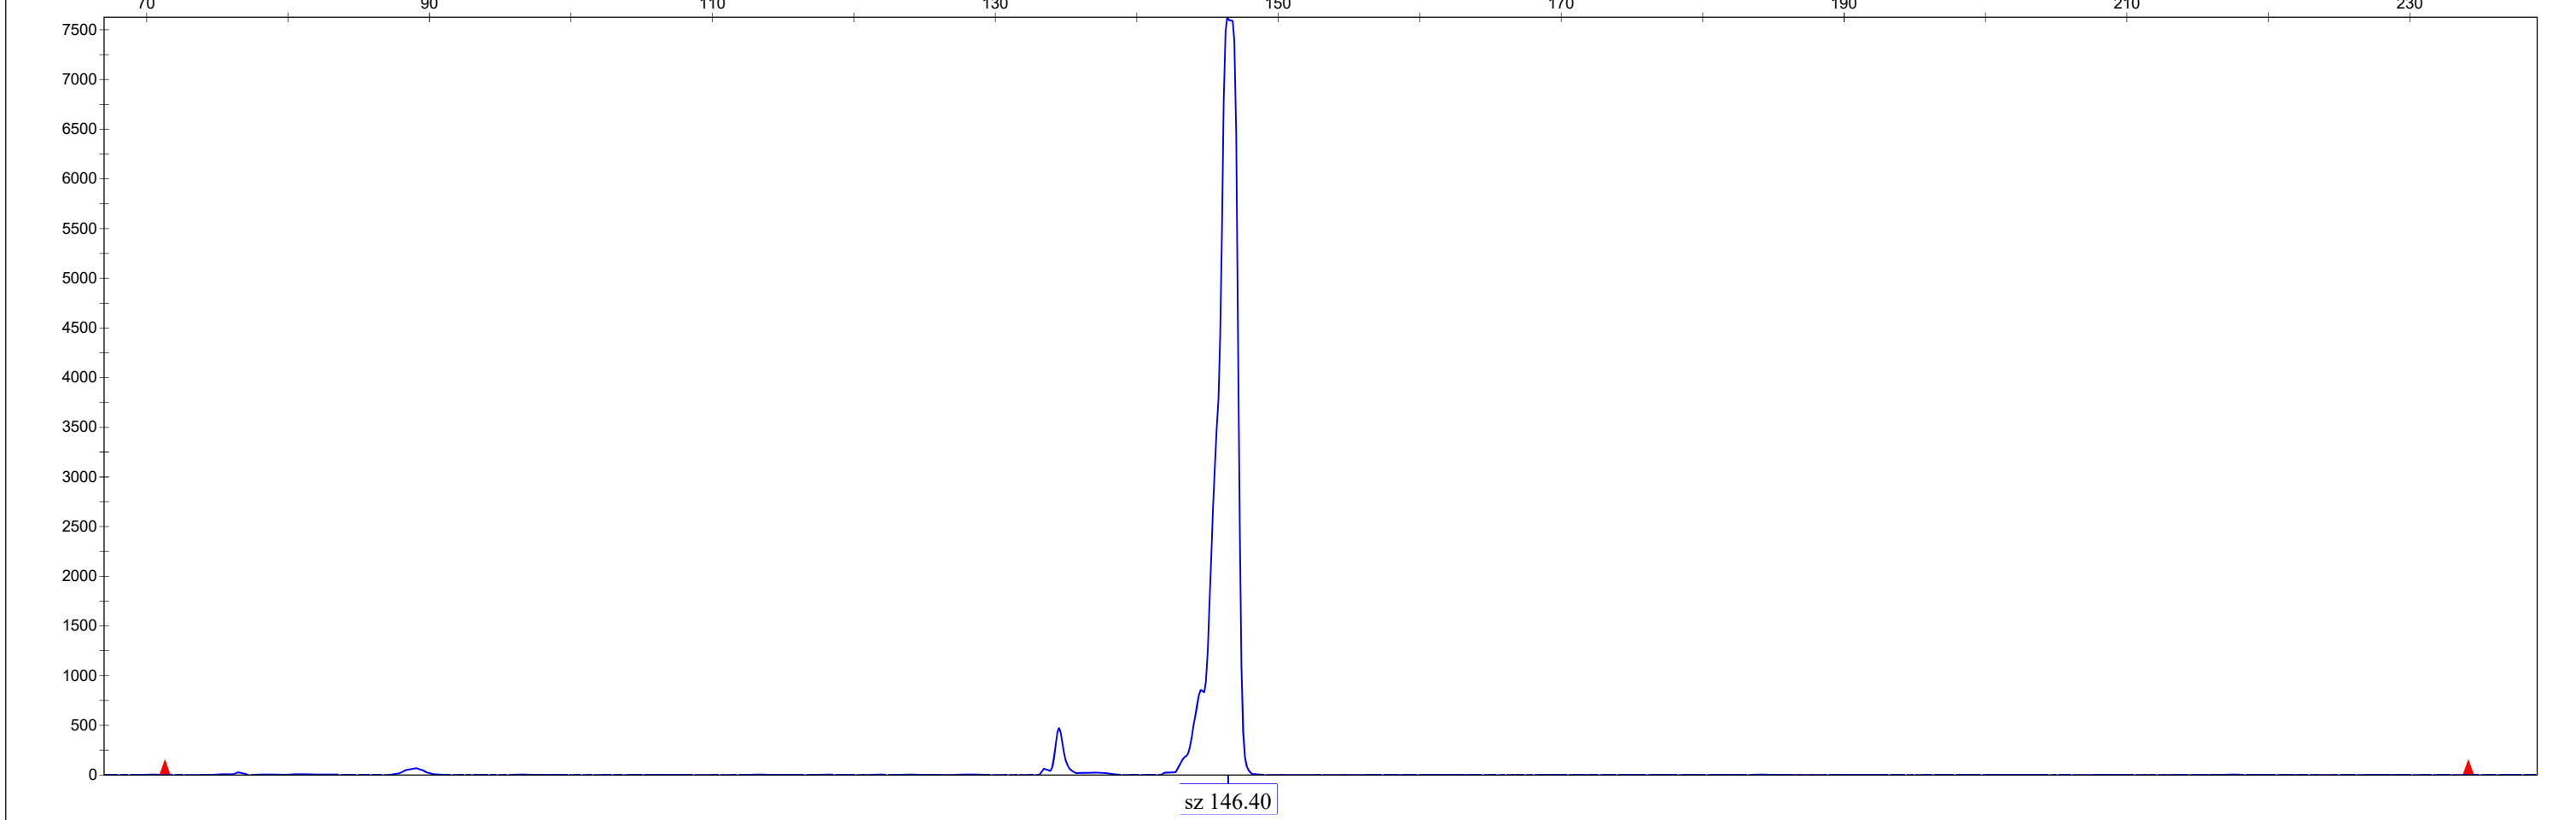

|                     |    |     |     |  |  |  |  |  |  |  |  |  |  |  |  |  |  |  |  |
|---------------------|----|-----|-----|--|--|--|--|--|--|--|--|--|--|--|--|--|--|--|--|
| 56 H11 015 Seq1.fsa | 56 | BC9 | BC9 |  |  |  |  |  |  |  |  |  |  |  |  |  |  |  |  |
|---------------------|----|-----|-----|--|--|--|--|--|--|--|--|--|--|--|--|--|--|--|--|

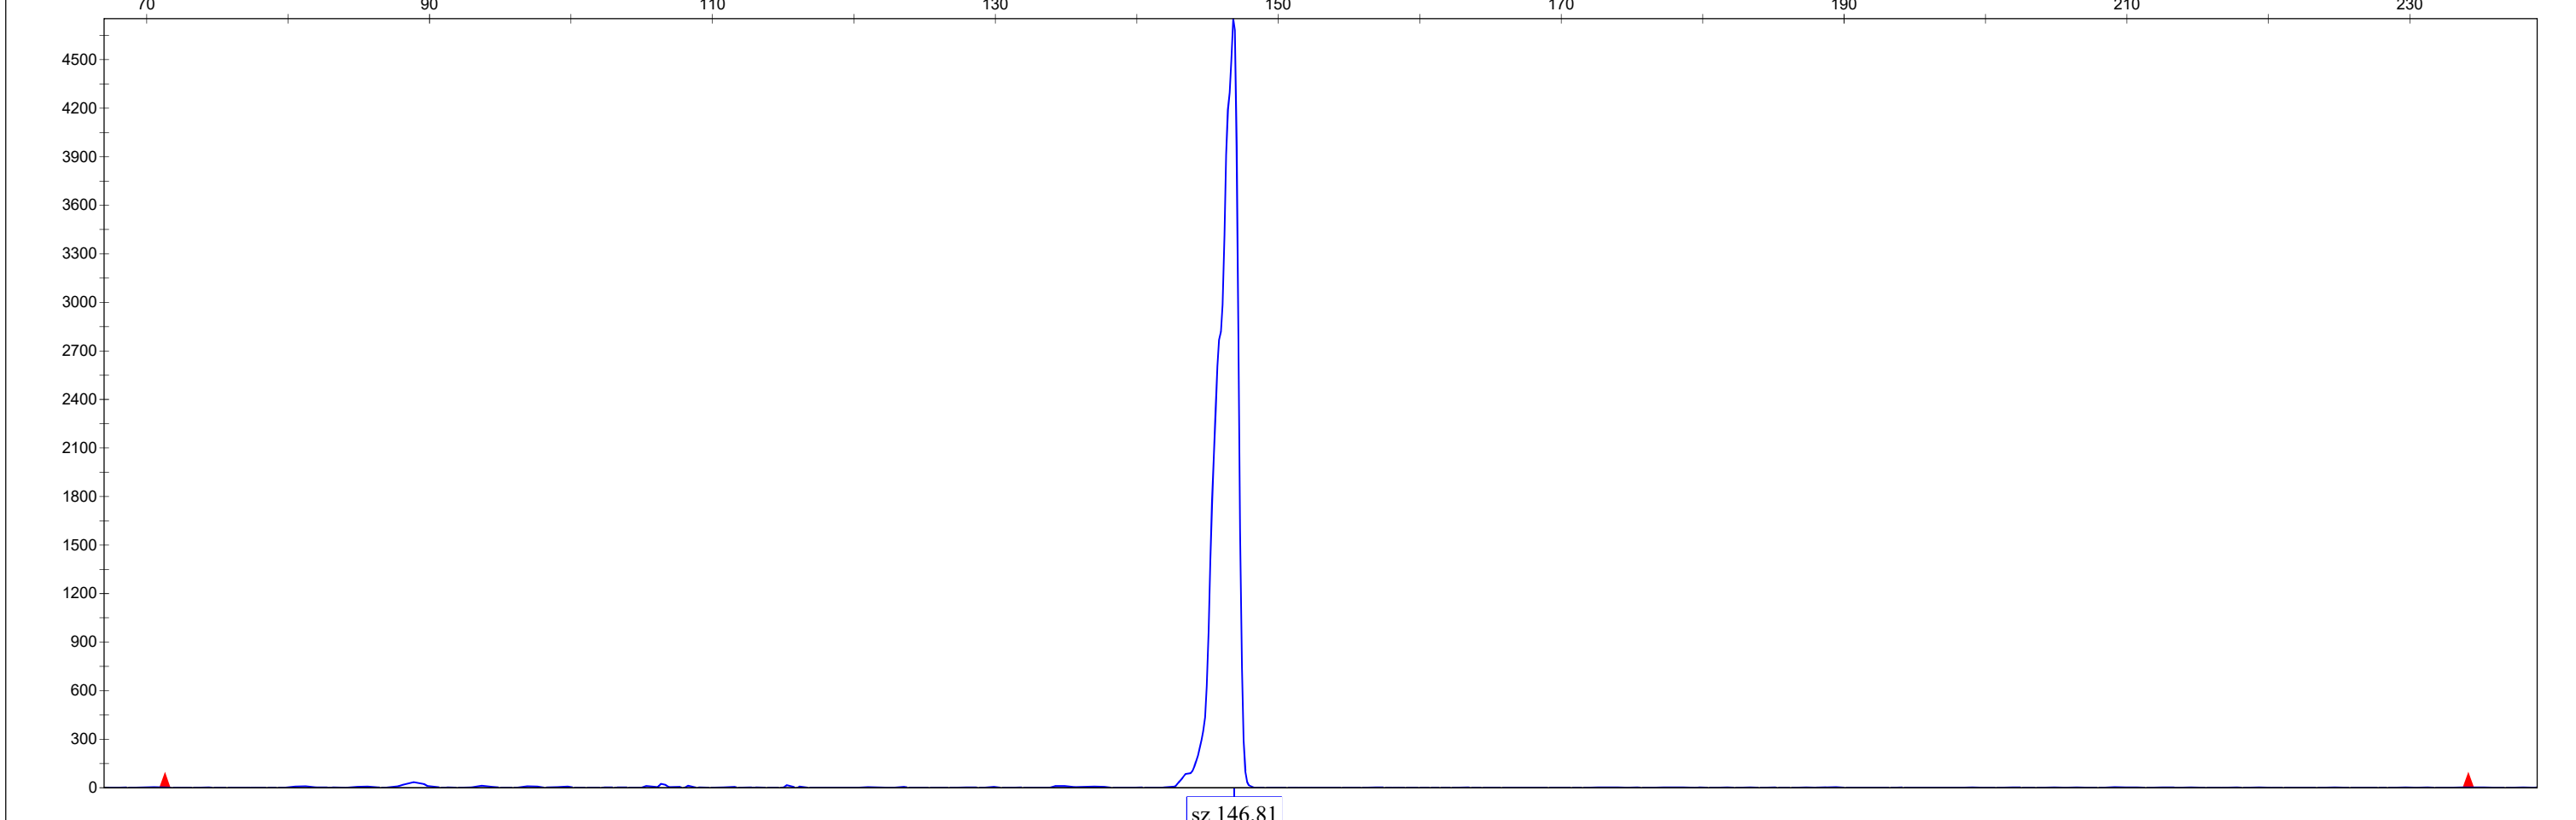

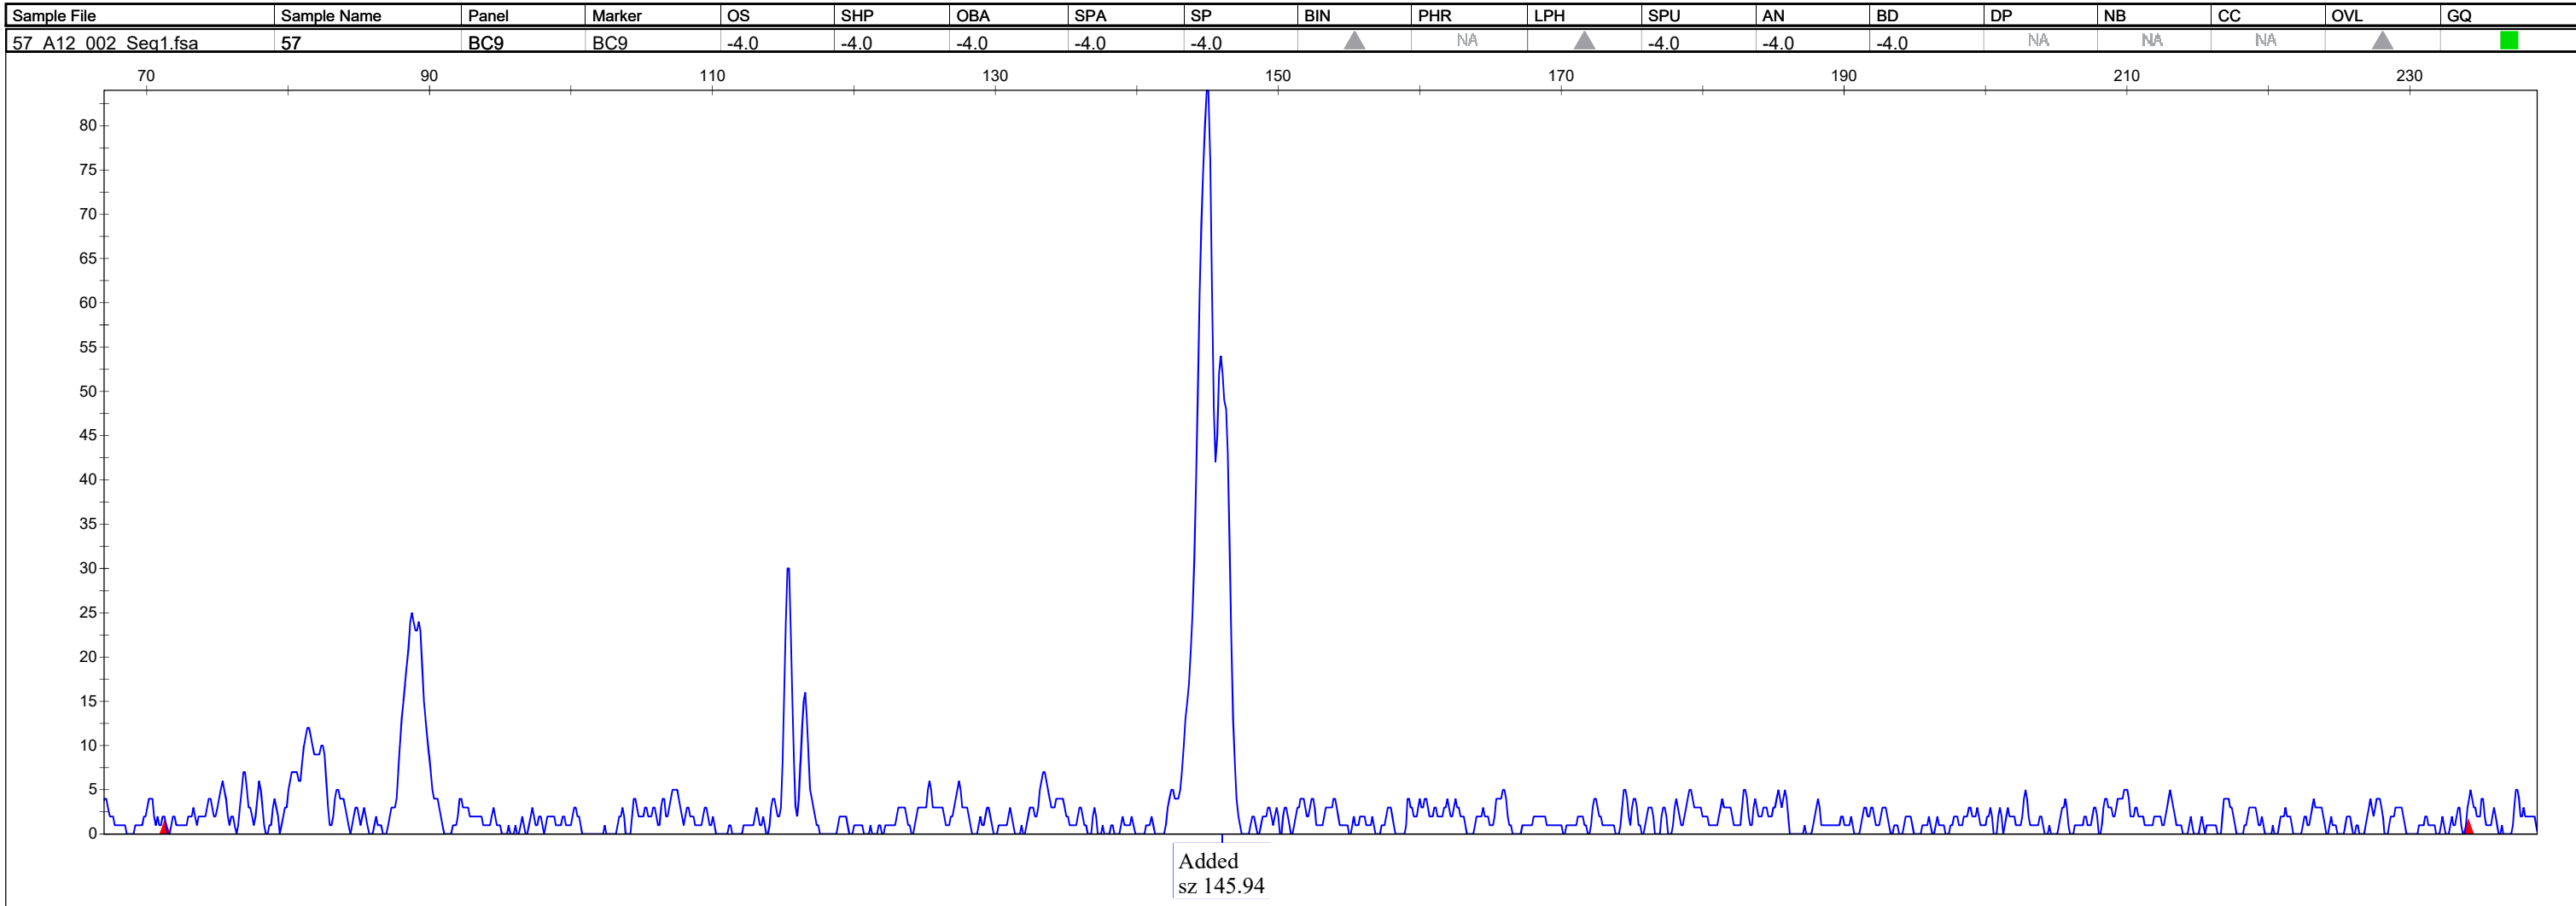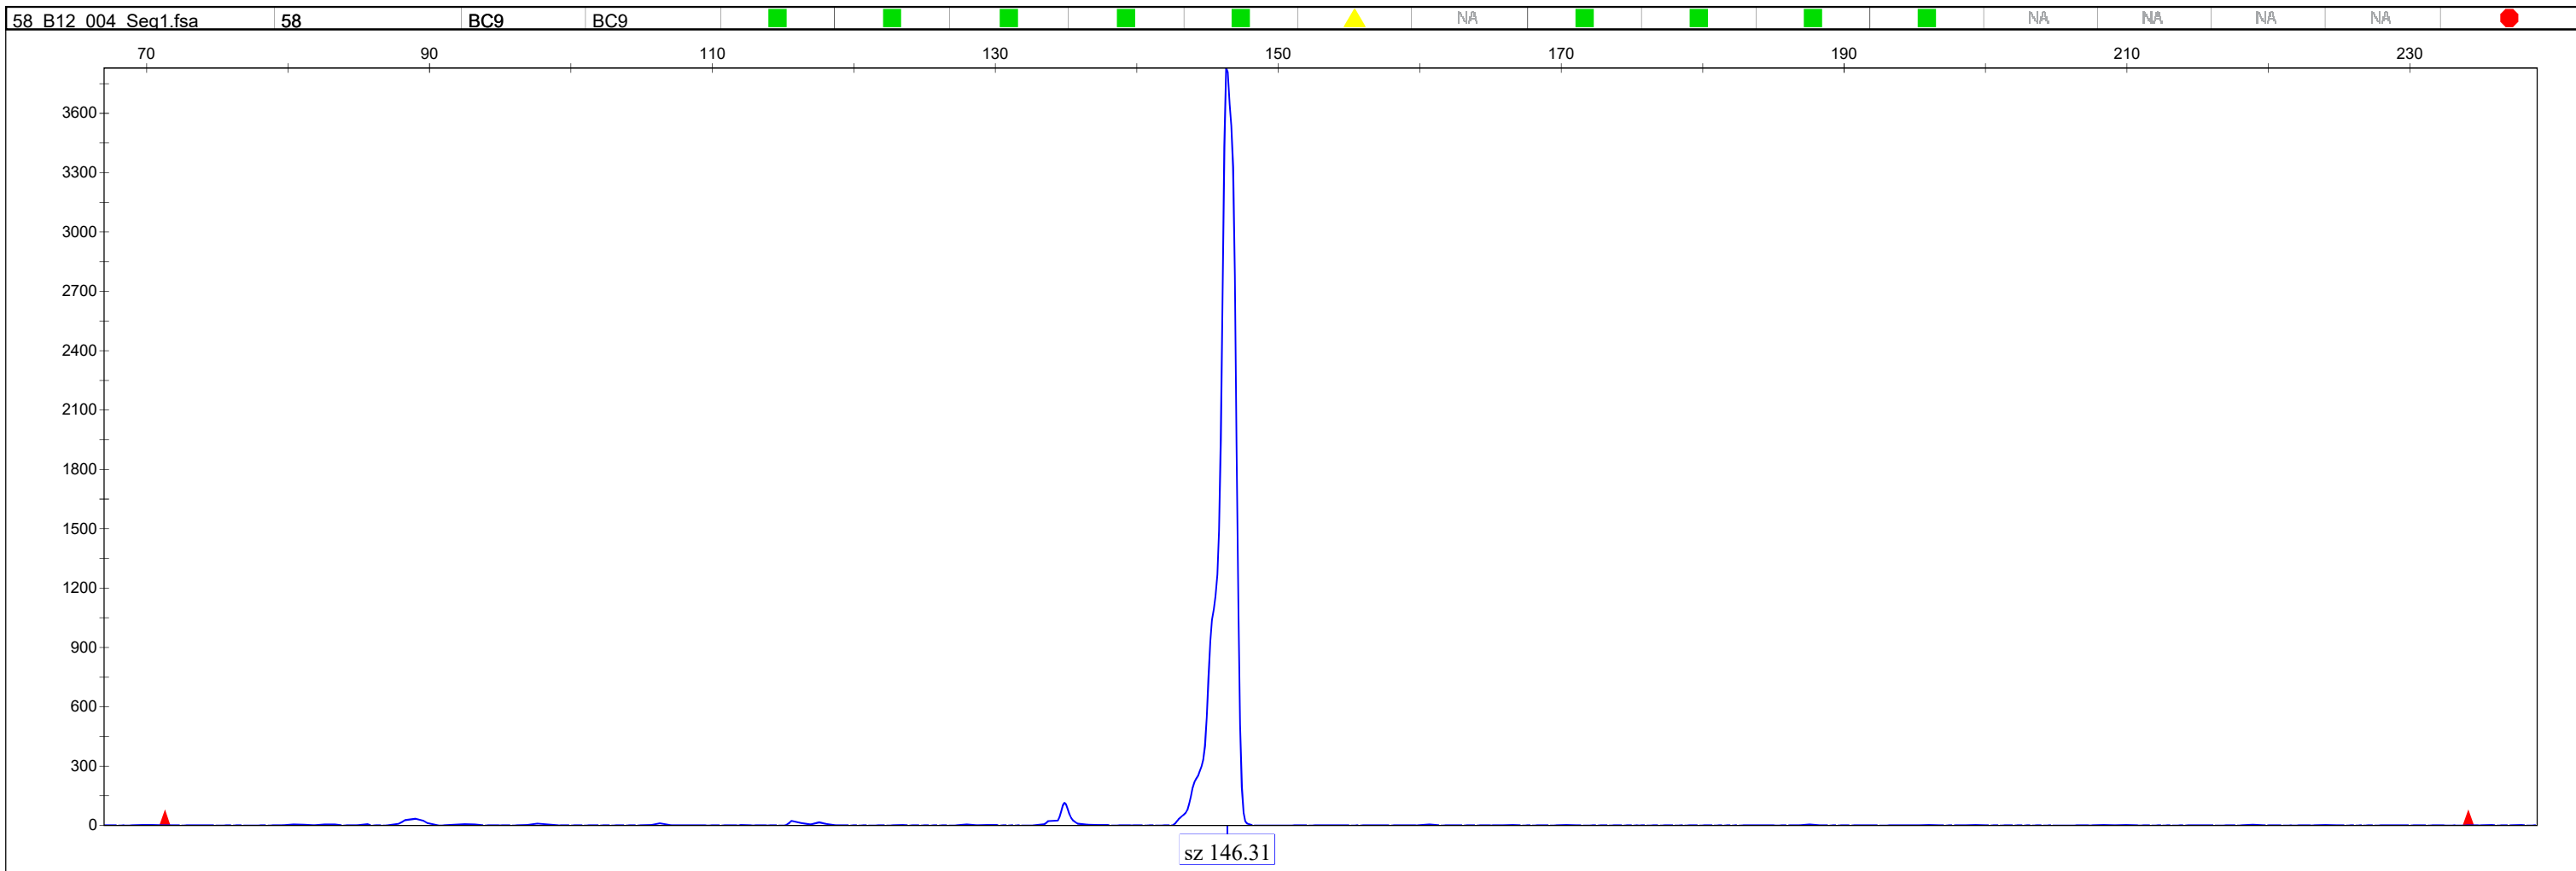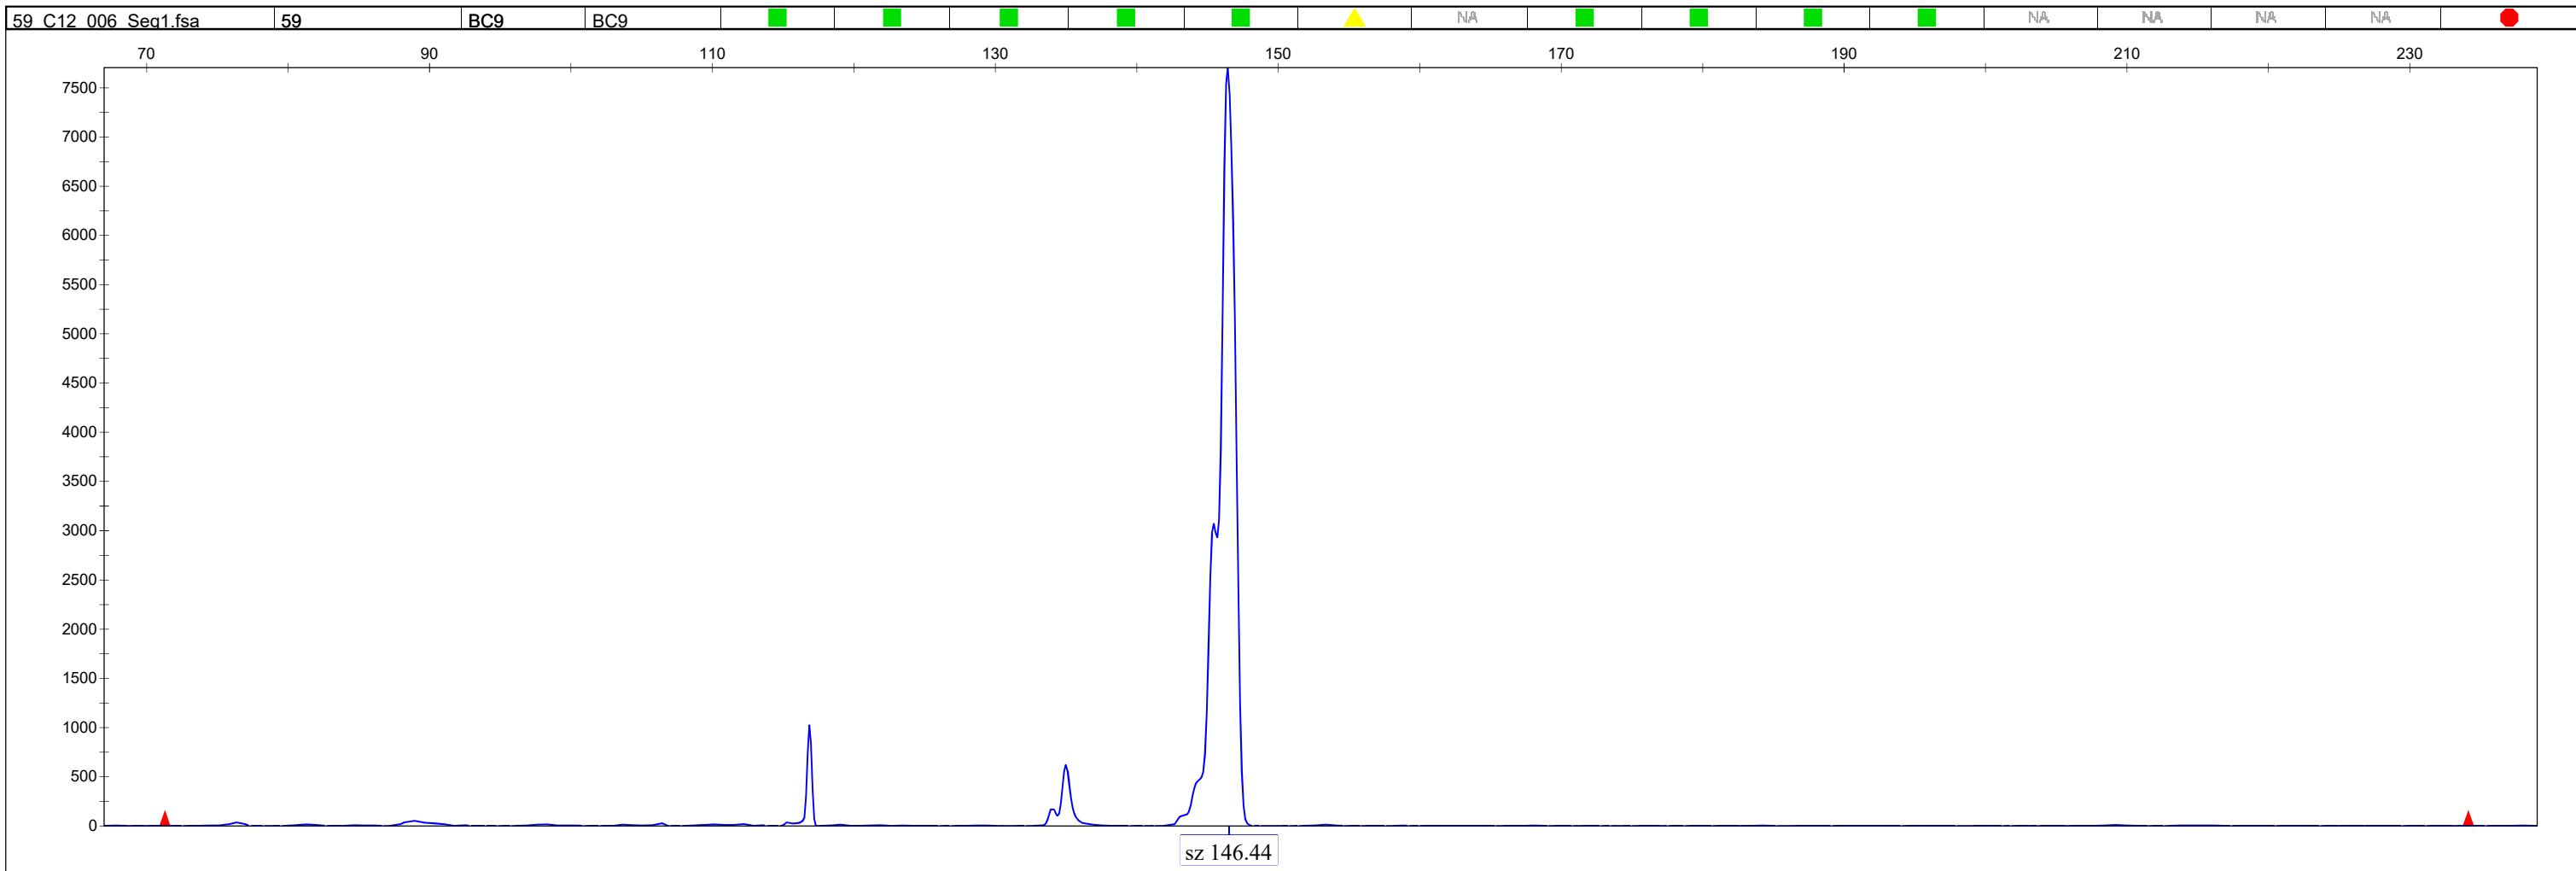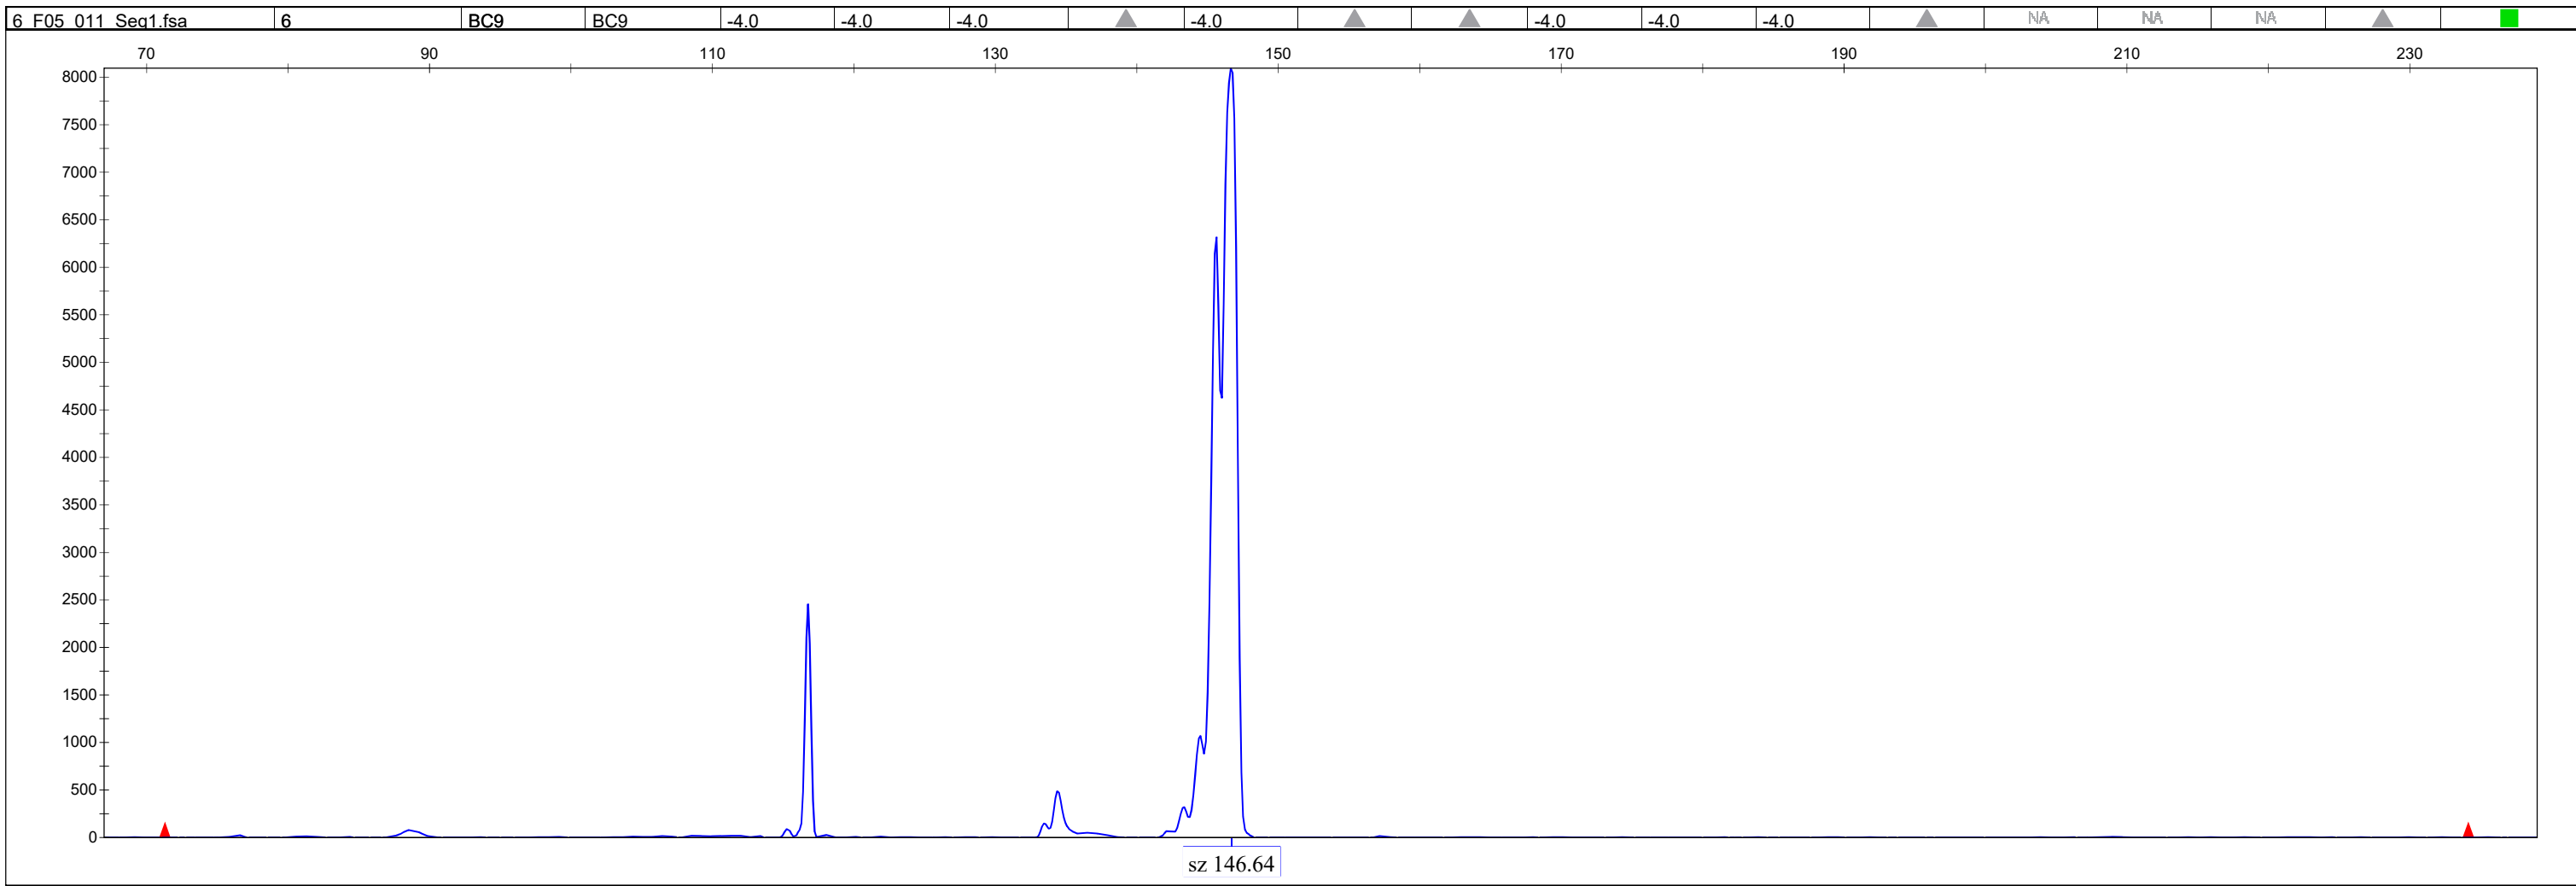

| Sample File        | Sample Name | Panel | Marker | OS   | SHP  | OBA  | SPA | SP   | BIN | PHR | LPH | SPU  | AN   | BD   | DP | NB | CC | OVL | GQ |
|--------------------|-------------|-------|--------|------|------|------|-----|------|-----|-----|-----|------|------|------|----|----|----|-----|----|
| 7 G05_013 Seq1.fsa | 7           | BC9   | BC9    | -4.0 | -4.0 | -4.0 |     | -4.0 |     | NA  |     | -4.0 | -4.0 | -4.0 | NA | NA | NA |     |    |

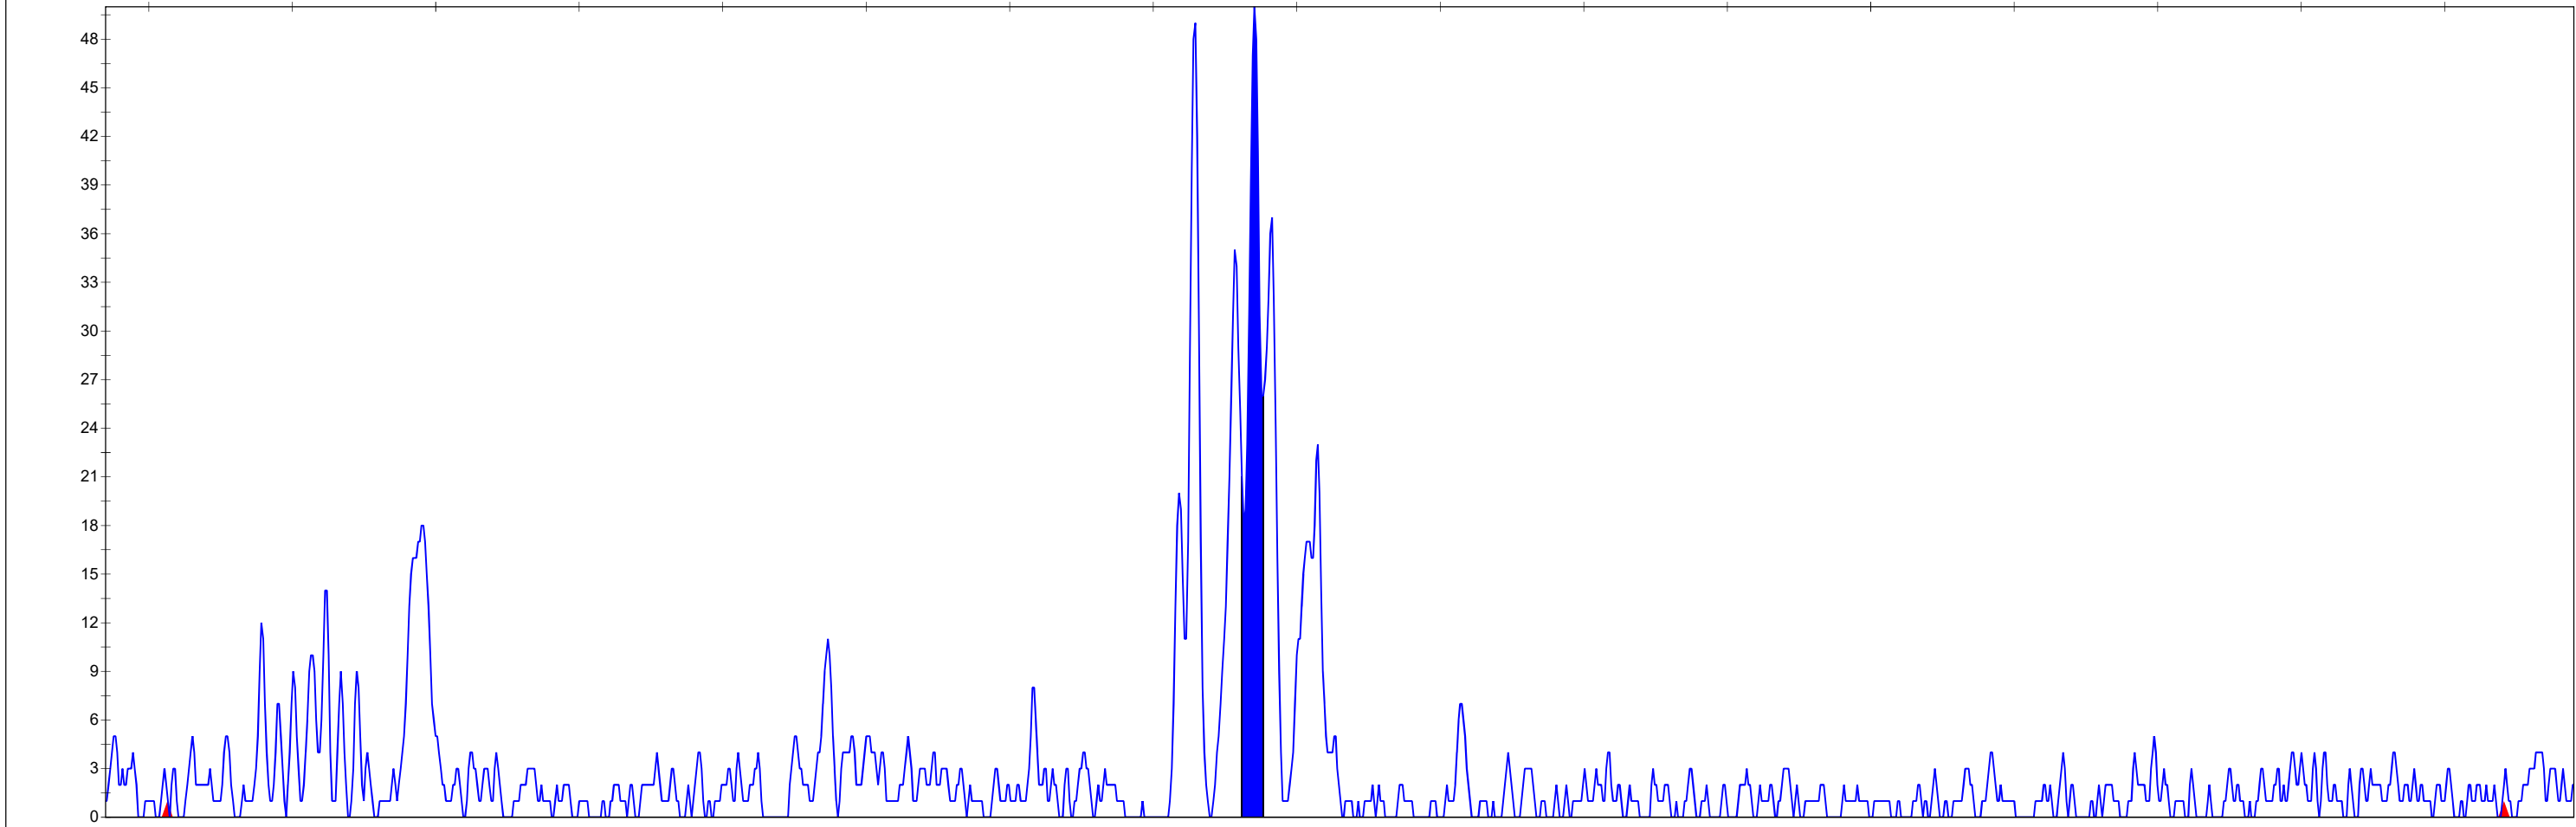

|                    |   |     |     |  |  |  |  |  |  |    |  |  |  |  |  |    |    |    |    |  |
|--------------------|---|-----|-----|--|--|--|--|--|--|----|--|--|--|--|--|----|----|----|----|--|
| 8 H05_015 Seq1.fsa | 8 | BC9 | BC9 |  |  |  |  |  |  | NA |  |  |  |  |  | NA | NA | NA | NA |  |
|--------------------|---|-----|-----|--|--|--|--|--|--|----|--|--|--|--|--|----|----|----|----|--|

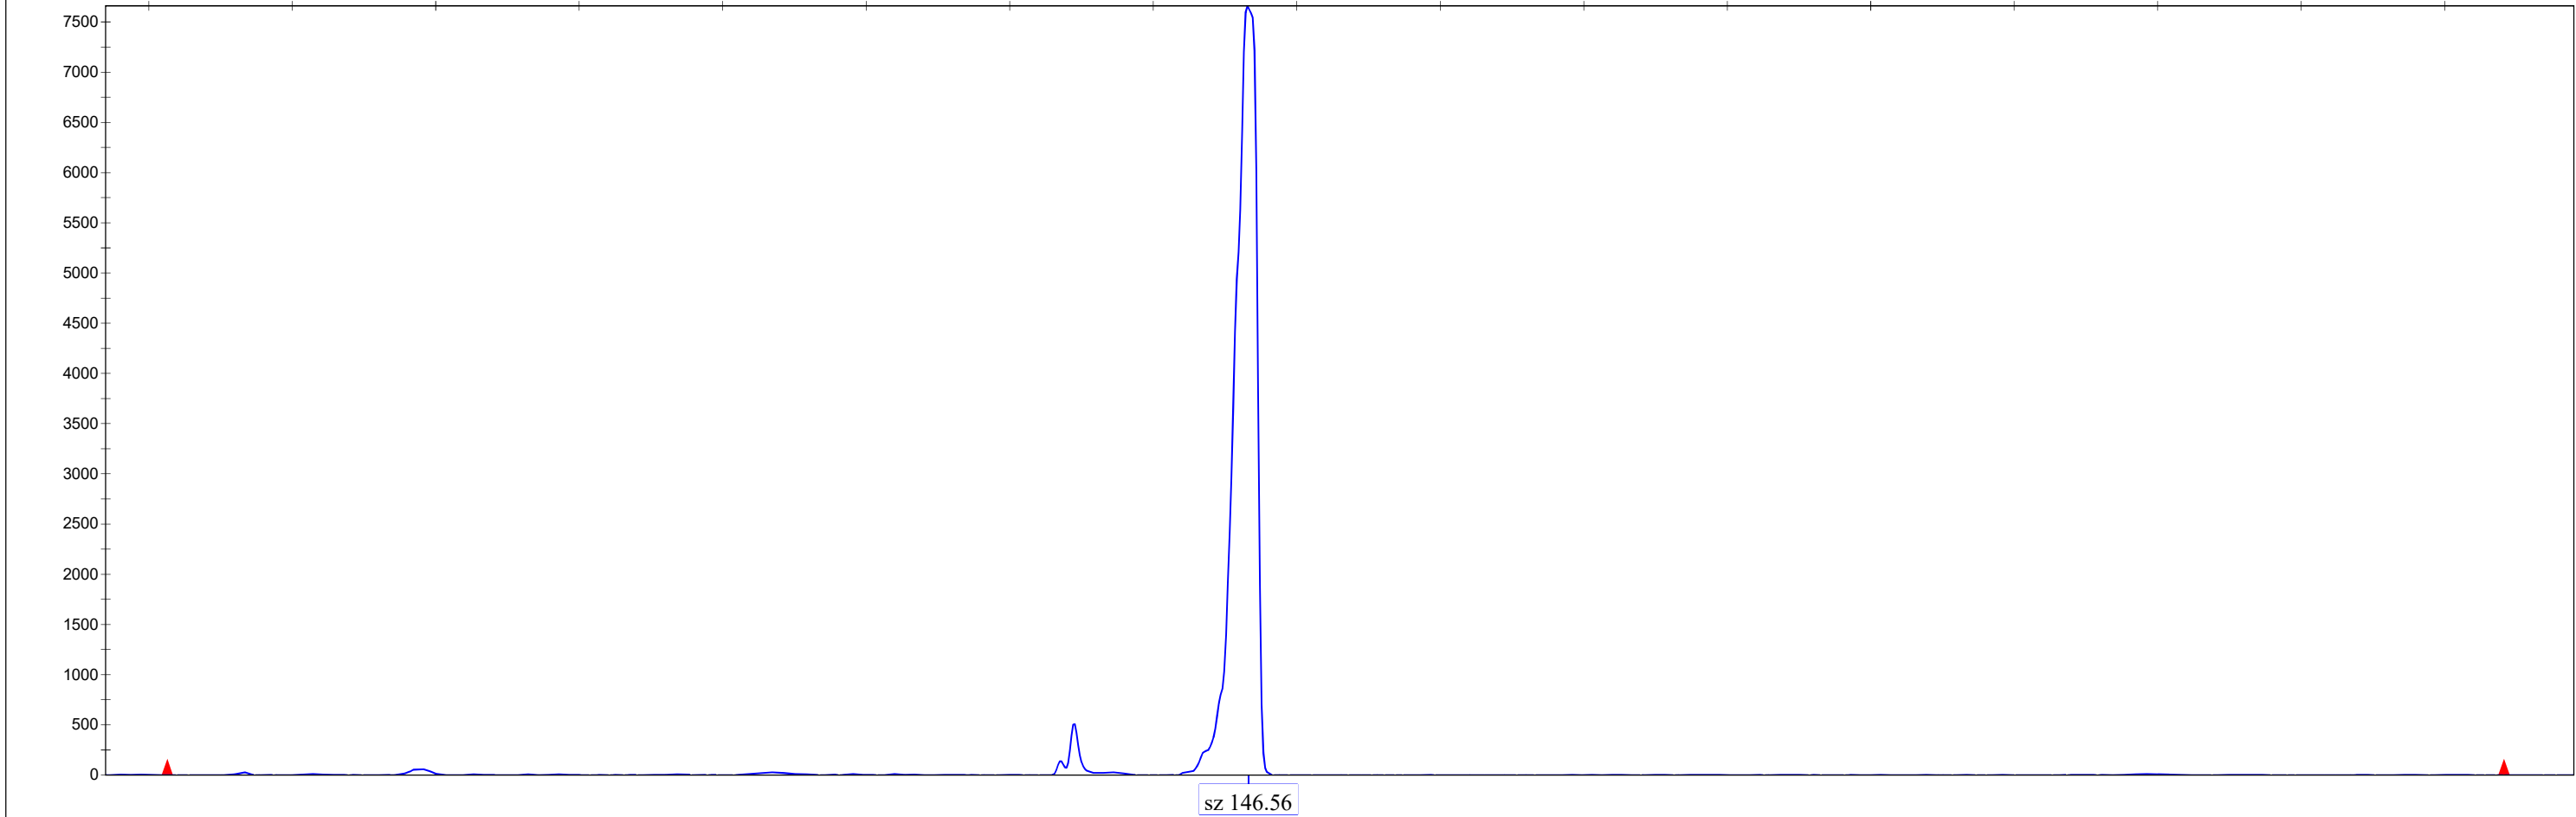

|                    |   |     |     |  |  |  |  |  |  |    |  |  |  |  |  |    |    |    |    |  |
|--------------------|---|-----|-----|--|--|--|--|--|--|----|--|--|--|--|--|----|----|----|----|--|
| 9 A06_002 Seq1.fsa | 9 | BC9 | BC9 |  |  |  |  |  |  | NA |  |  |  |  |  | NA | NA | NA | NA |  |
|--------------------|---|-----|-----|--|--|--|--|--|--|----|--|--|--|--|--|----|----|----|----|--|

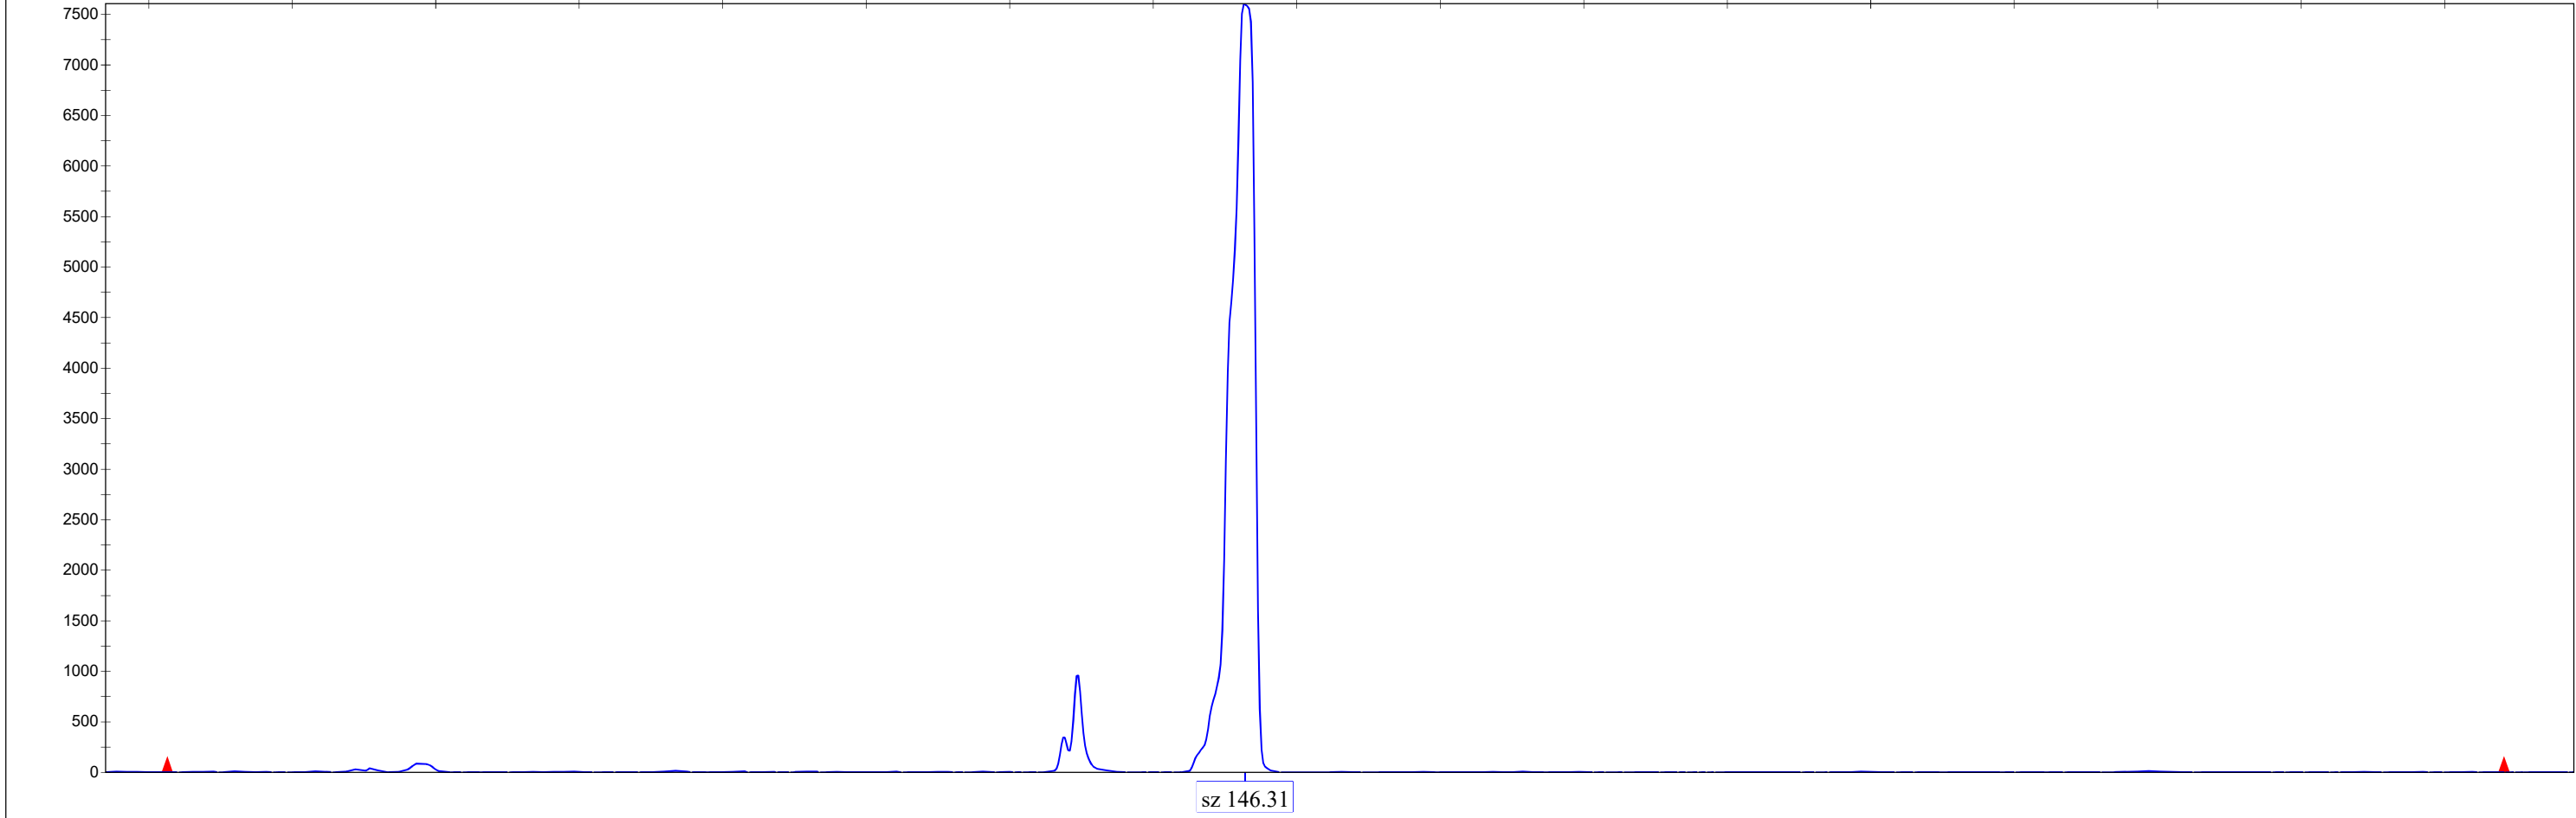

Supplement: s1 [file s1]
