# Supplementary material for: Molecular Biological Methods to Assess Different Botrytis cinerea Strains on Grapes
Source: MDPI journal article supplement (doi:10.3390/microbiolres15020037), 2024-04-19

| Sample File         | Sample Name | Panel | Marker | OS   | SHP  | OBA  | SPA | SP   | BIN | PHR  | LPH | SPU  | AN   | BD | DP | NB | CC | OVL | GQ |
|---------------------|-------------|-------|--------|------|------|------|-----|------|-----|------|-----|------|------|----|----|----|----|-----|----|
| 01_A01_001_Seq1.fsa | 01          | BC3   | BC3    | -4.0 | -4.0 | -4.0 |     | -4.0 |     | -4.0 |     | -4.0 | -4.0 |    |    | NA | NA | NA  |    |

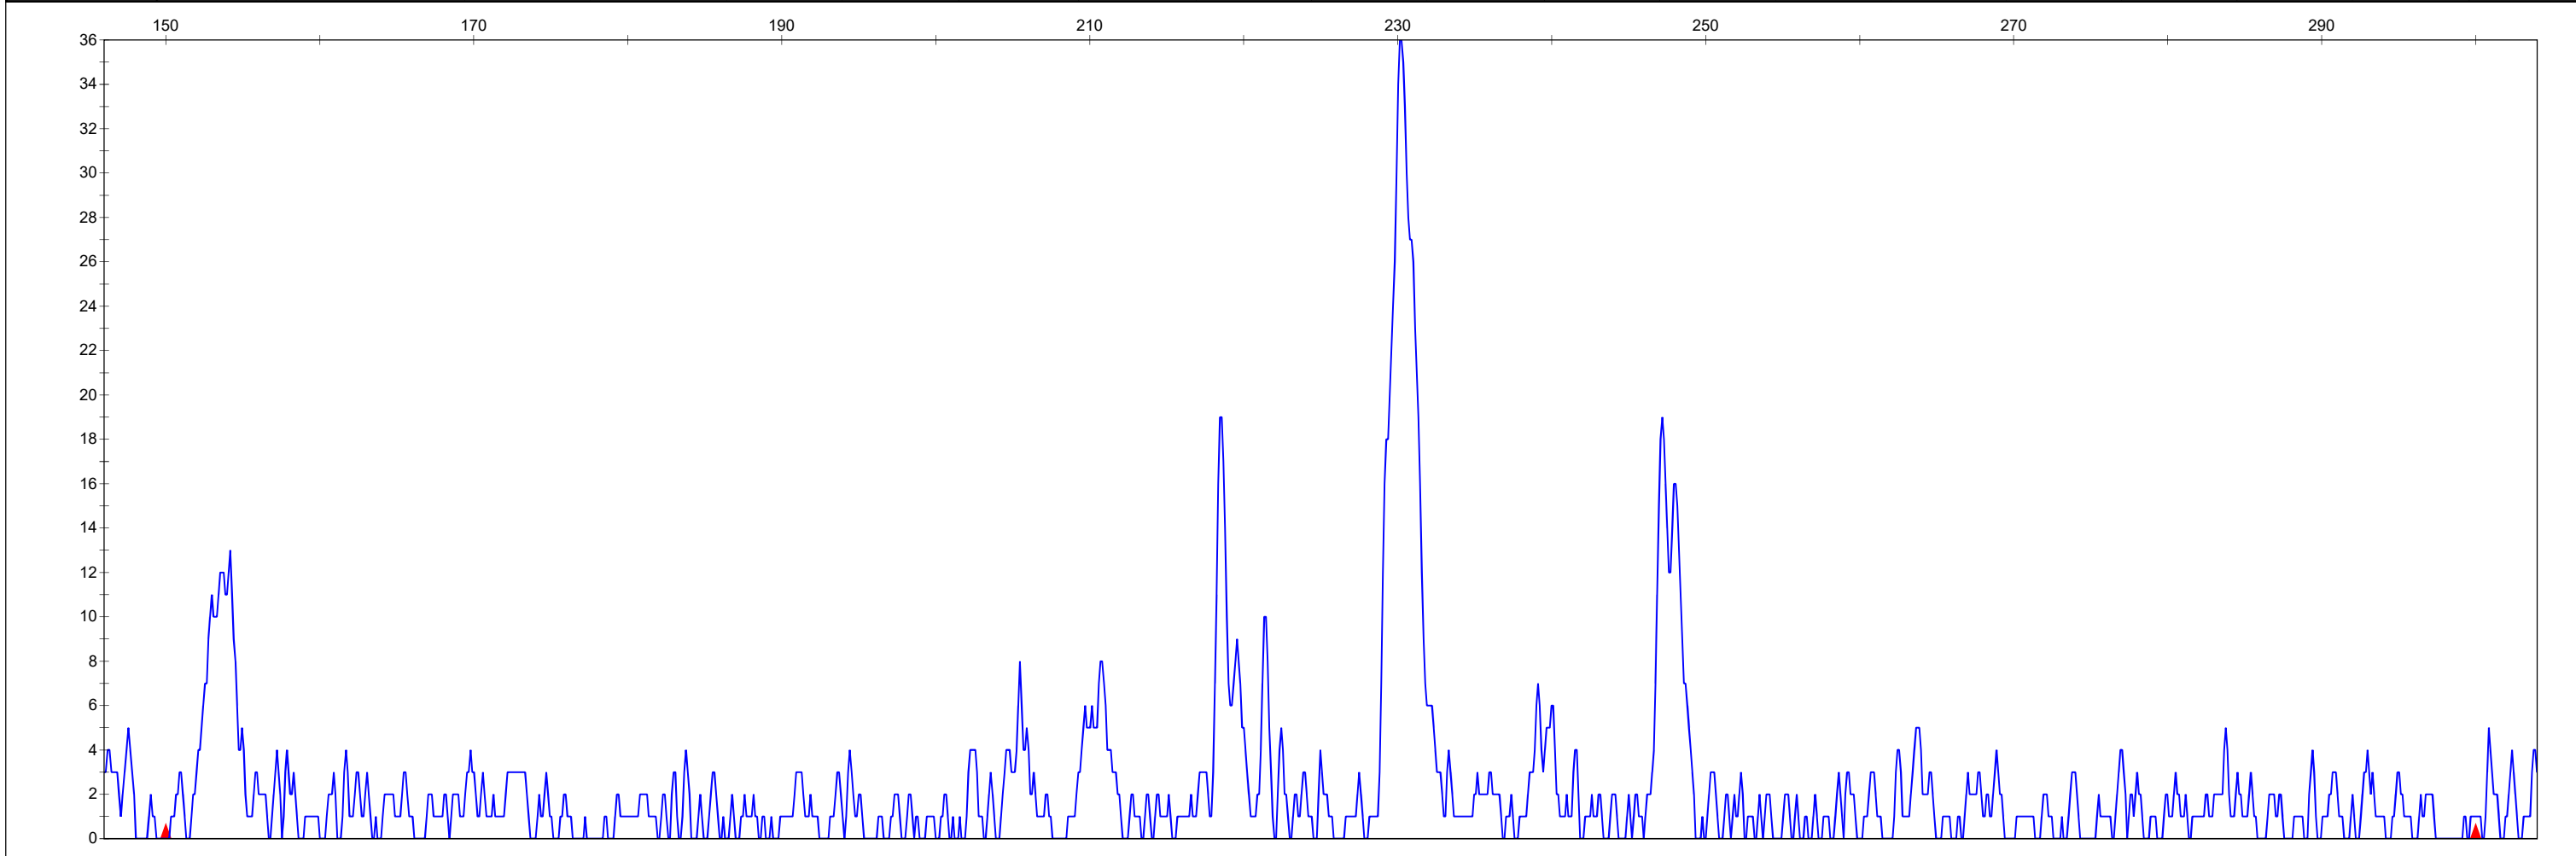

|                     |    |     |     |      |      |      |  |      |  |      |  |      |  |  |  |    |    |    |  |  |
|---------------------|----|-----|-----|------|------|------|--|------|--|------|--|------|--|--|--|----|----|----|--|--|
| 02_B01_003_Seq1.fsa | 02 | BC3 | BC3 | -4.0 | -4.0 | -4.0 |  | -4.0 |  | -4.0 |  | -4.0 |  |  |  | NA | NA | NA |  |  |
|---------------------|----|-----|-----|------|------|------|--|------|--|------|--|------|--|--|--|----|----|----|--|--|

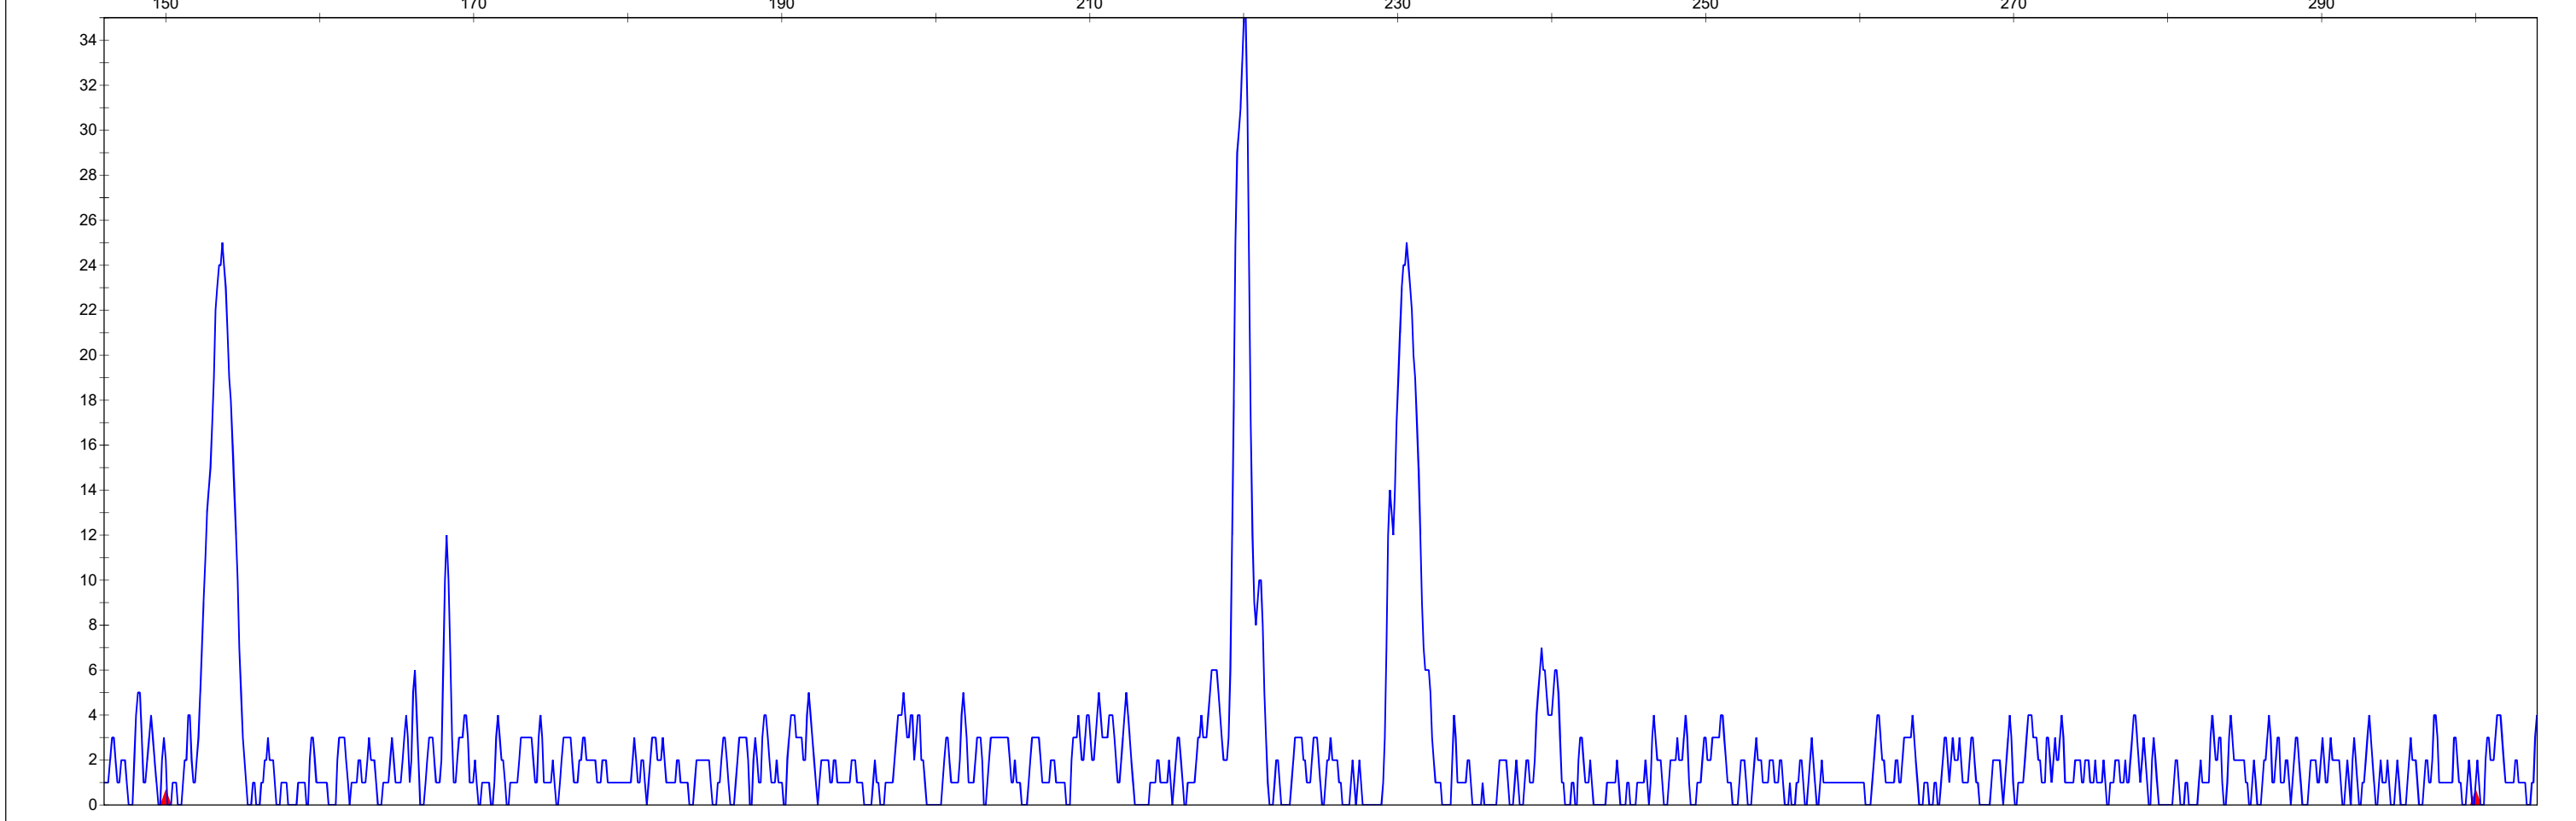

|                     |    |     |     |      |      |      |      |      |  |  |  |  |  |  |  |    |    |    |  |  |
|---------------------|----|-----|-----|------|------|------|------|------|--|--|--|--|--|--|--|----|----|----|--|--|
| 03_C01_005_Seq1.fsa | 03 | BC3 | BC3 | -4.0 | -4.0 | -4.0 | -4.0 | -4.0 |  |  |  |  |  |  |  | NA | NA | NA |  |  |
|---------------------|----|-----|-----|------|------|------|------|------|--|--|--|--|--|--|--|----|----|----|--|--|

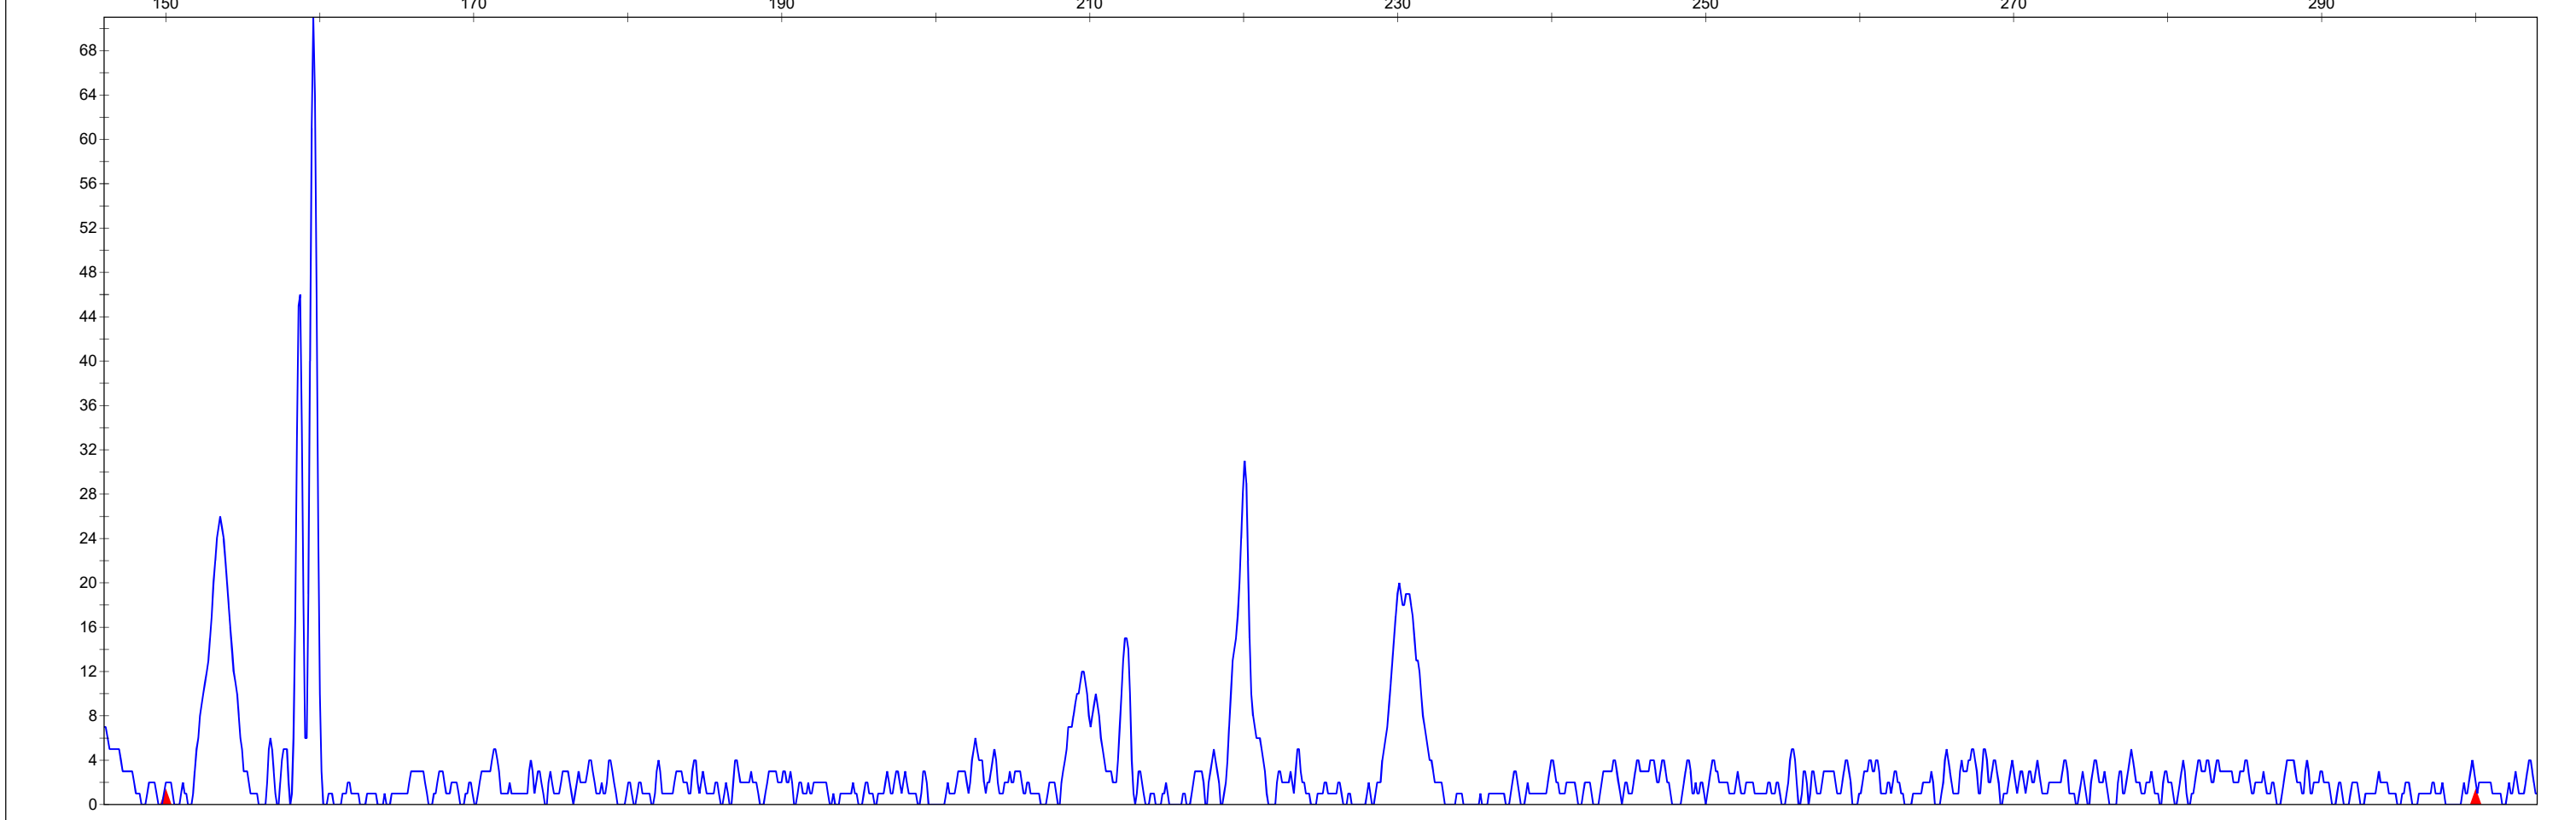

|                     |    |     |     |      |      |      |      |      |  |  |  |      |      |  |  |    |    |    |  |  |
|---------------------|----|-----|-----|------|------|------|------|------|--|--|--|------|------|--|--|----|----|----|--|--|
| 04_D01_007_Seq1.fsa | 04 | BC3 | BC3 | -4.0 | -4.0 | -4.0 | -4.0 | -4.0 |  |  |  | -4.0 | -4.0 |  |  | NA | NA | NA |  |  |
|---------------------|----|-----|-----|------|------|------|------|------|--|--|--|------|------|--|--|----|----|----|--|--|

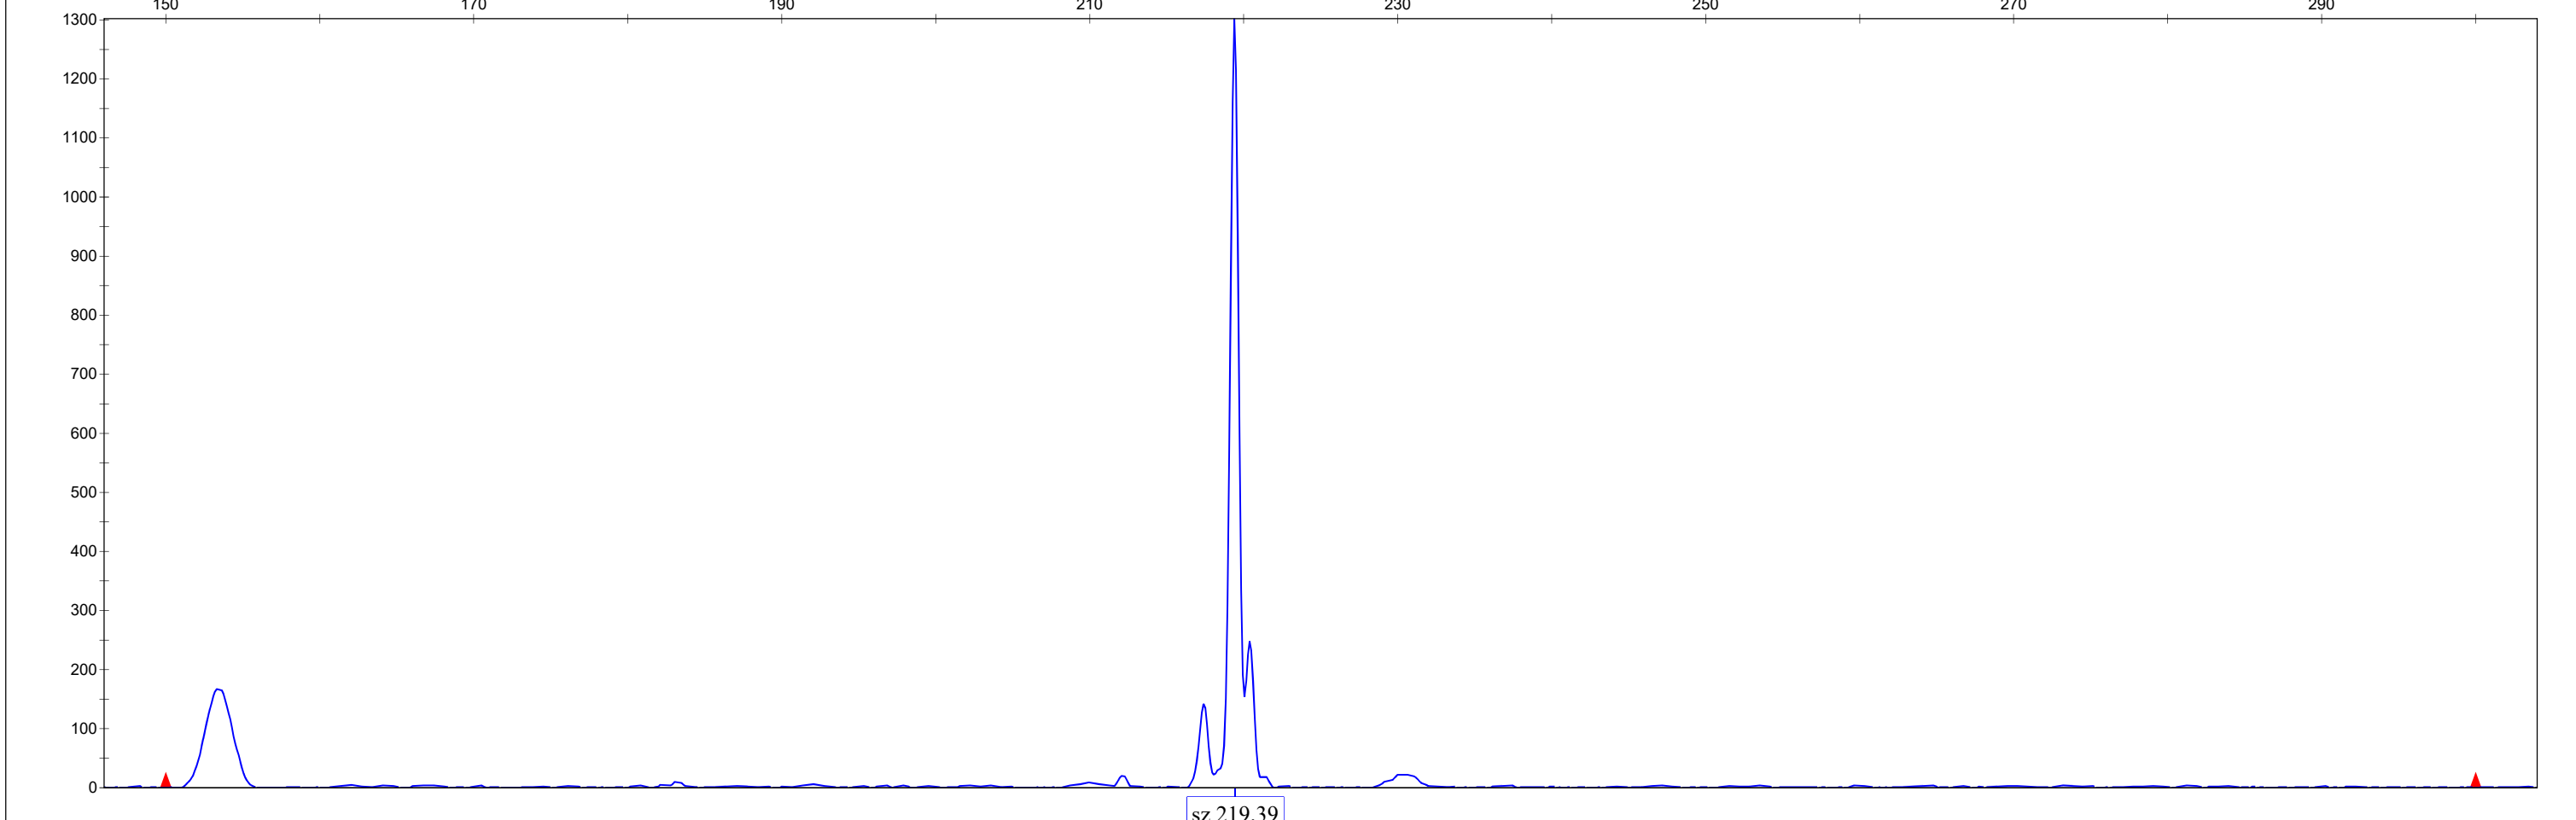

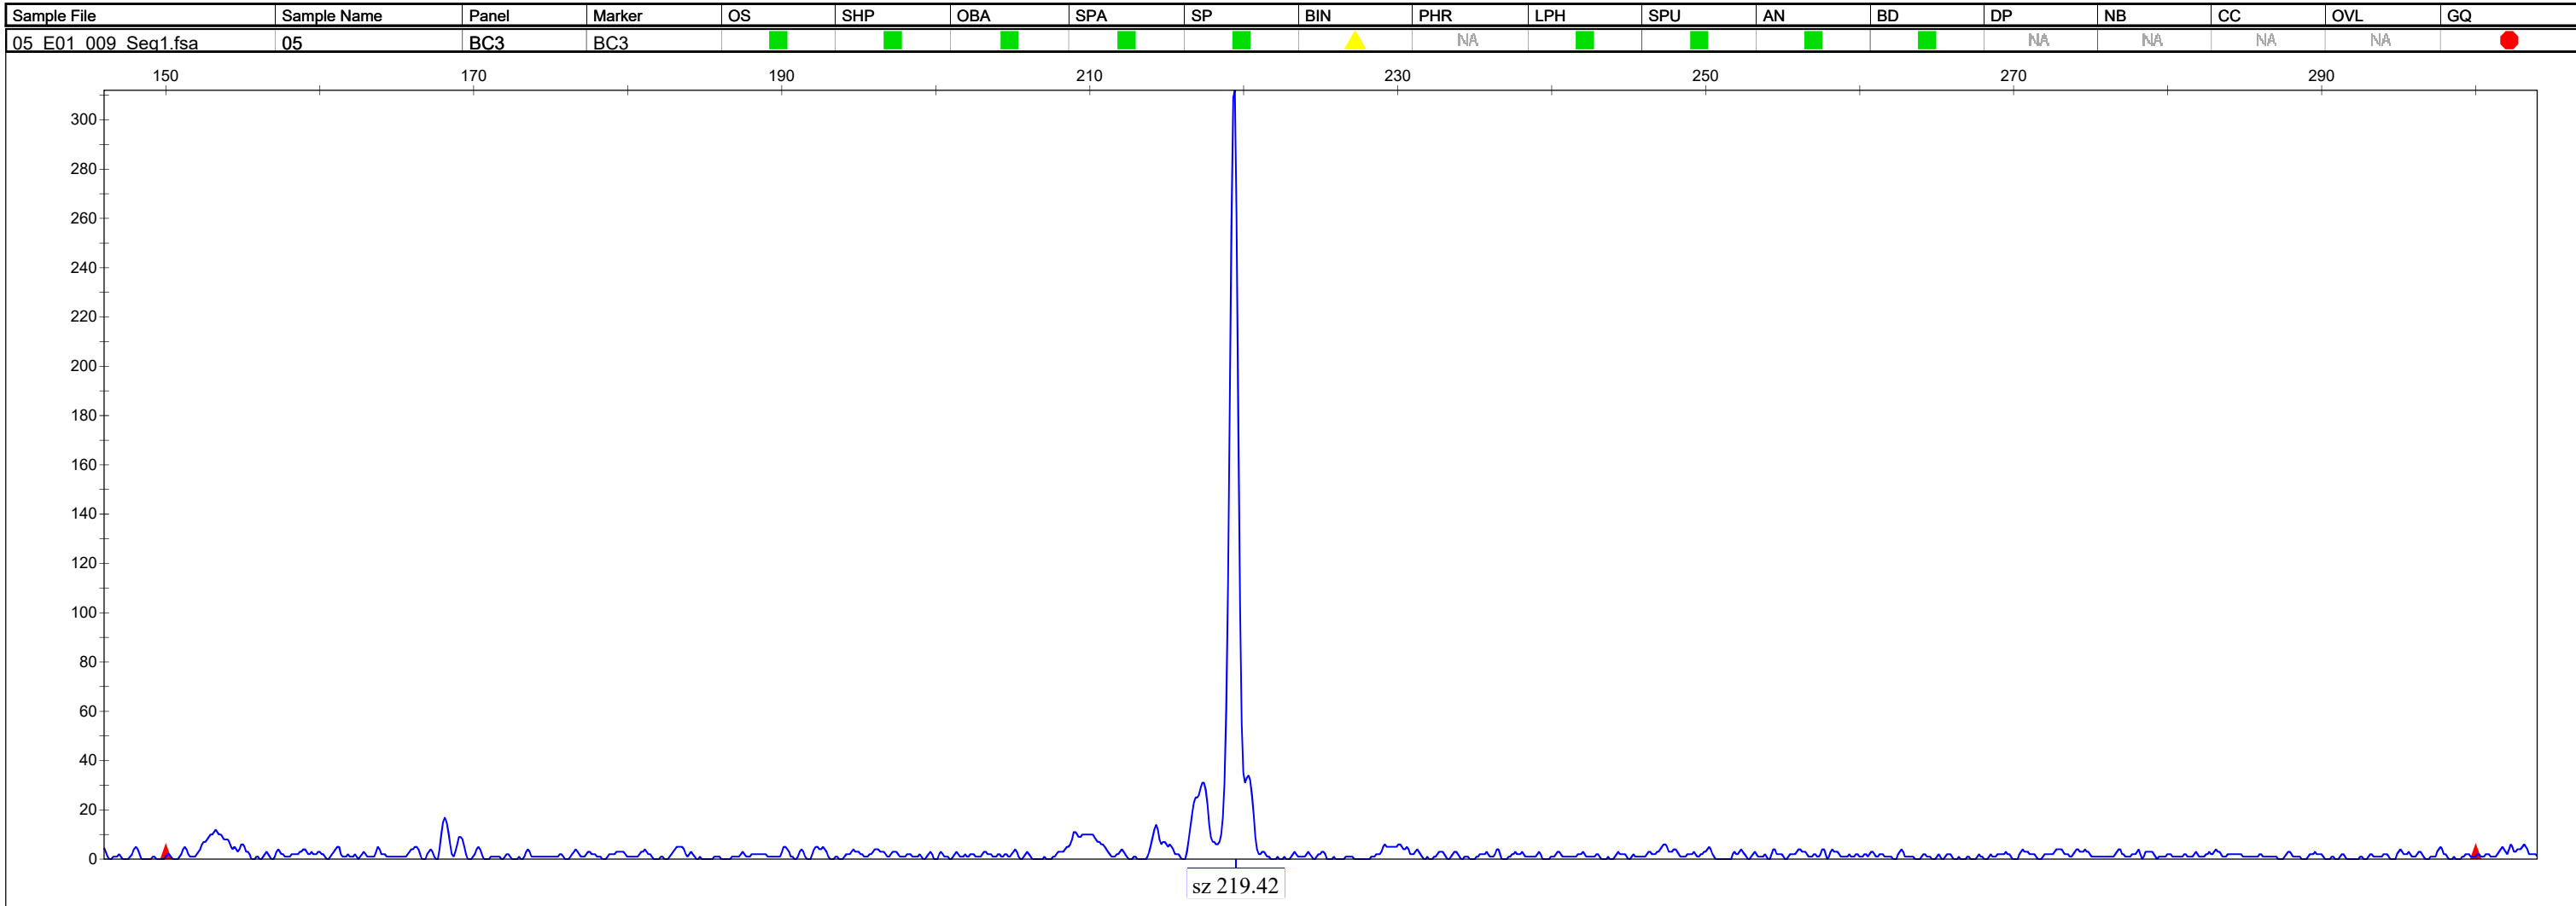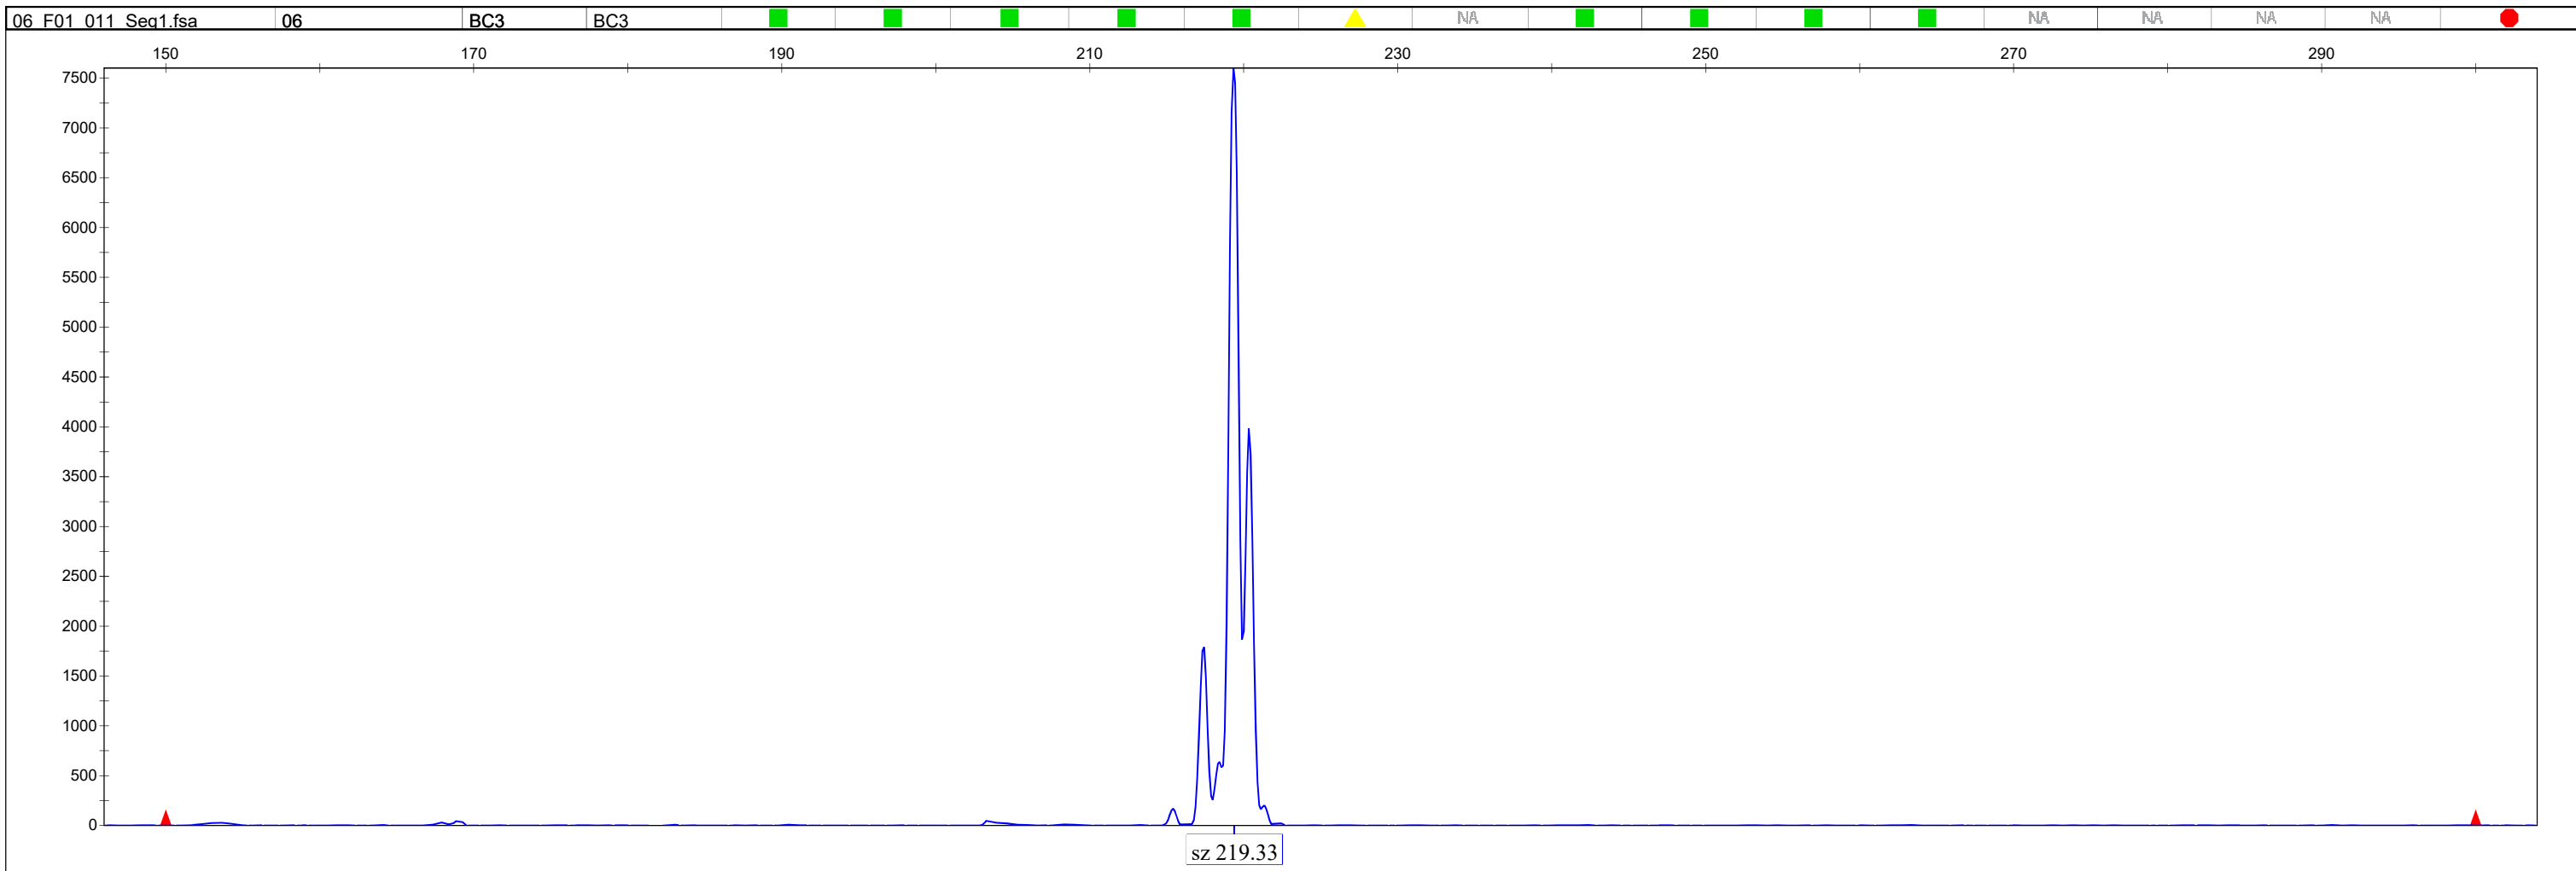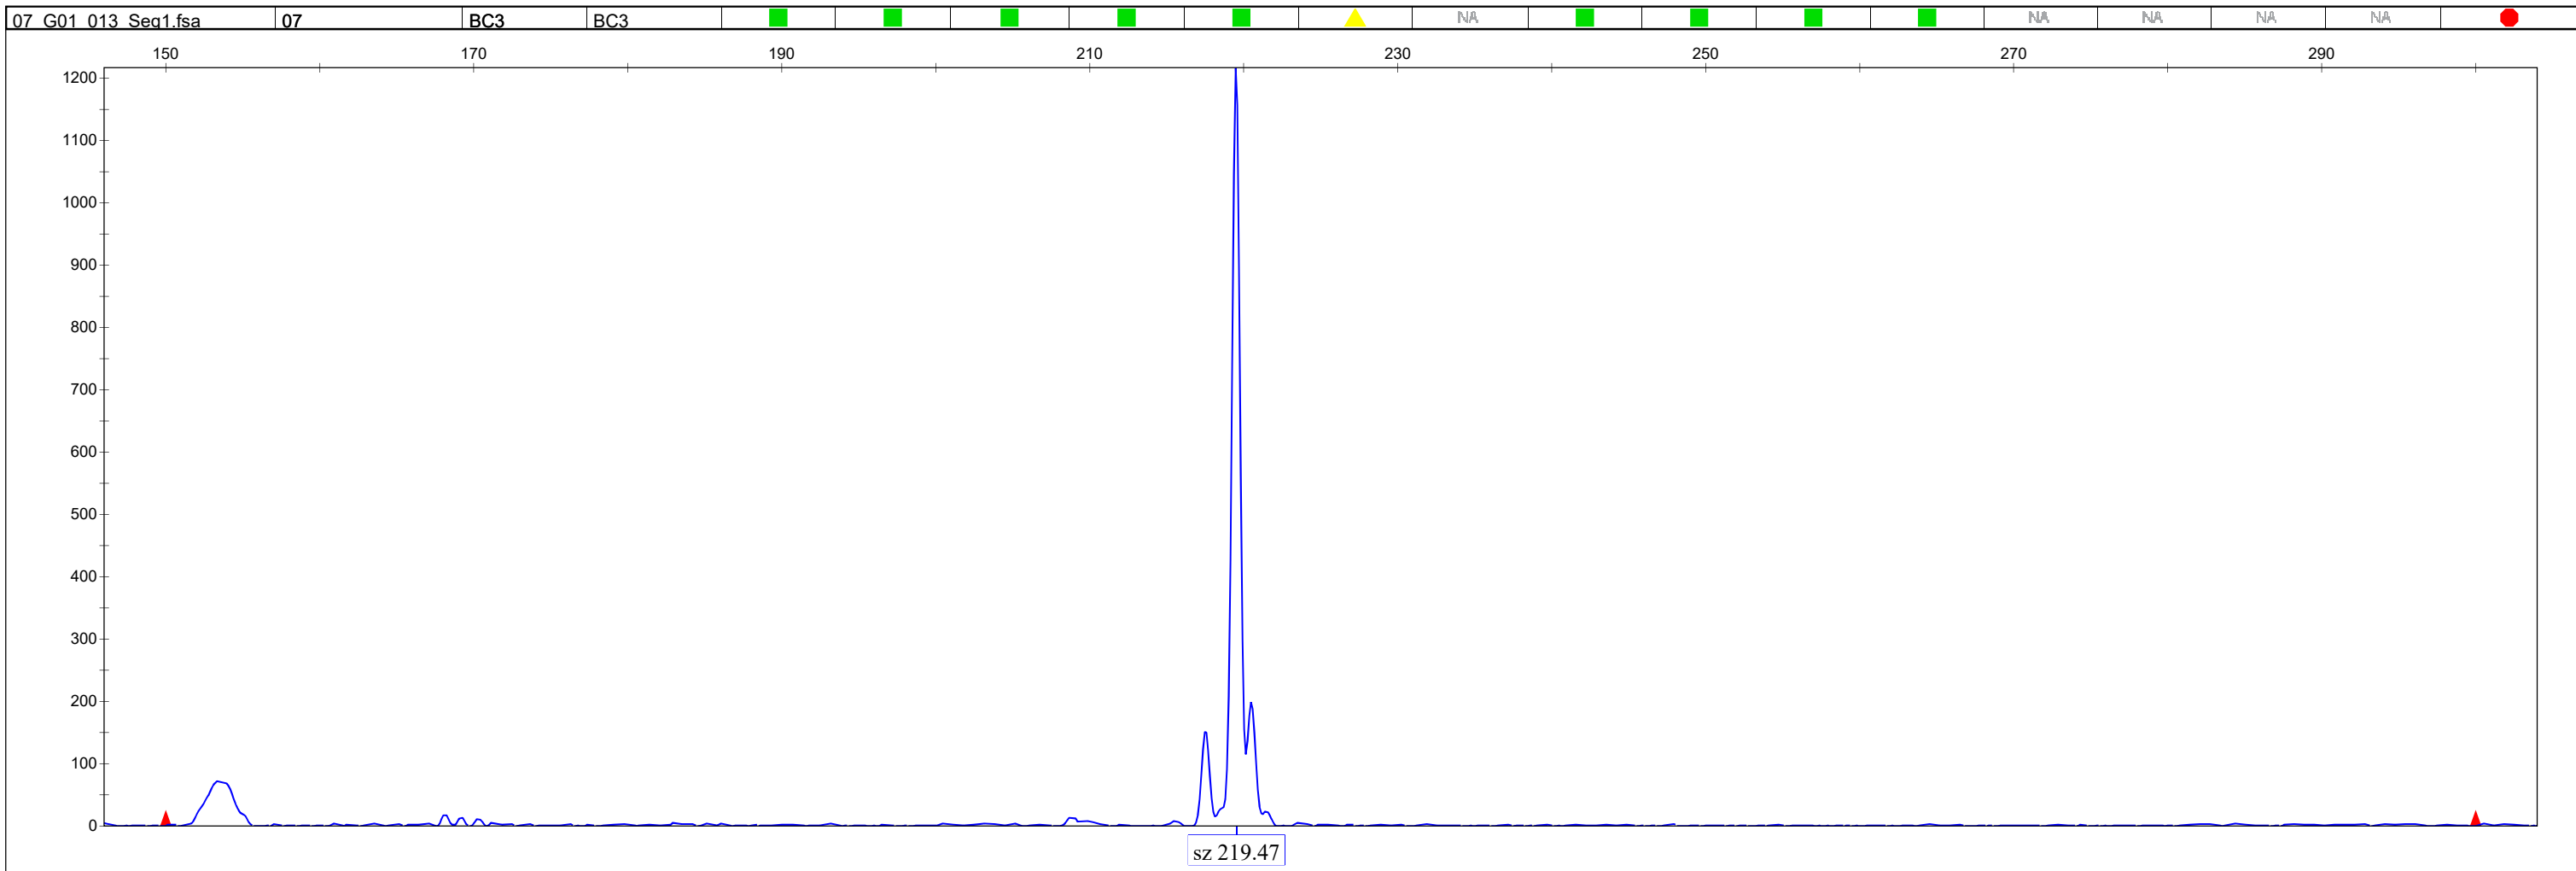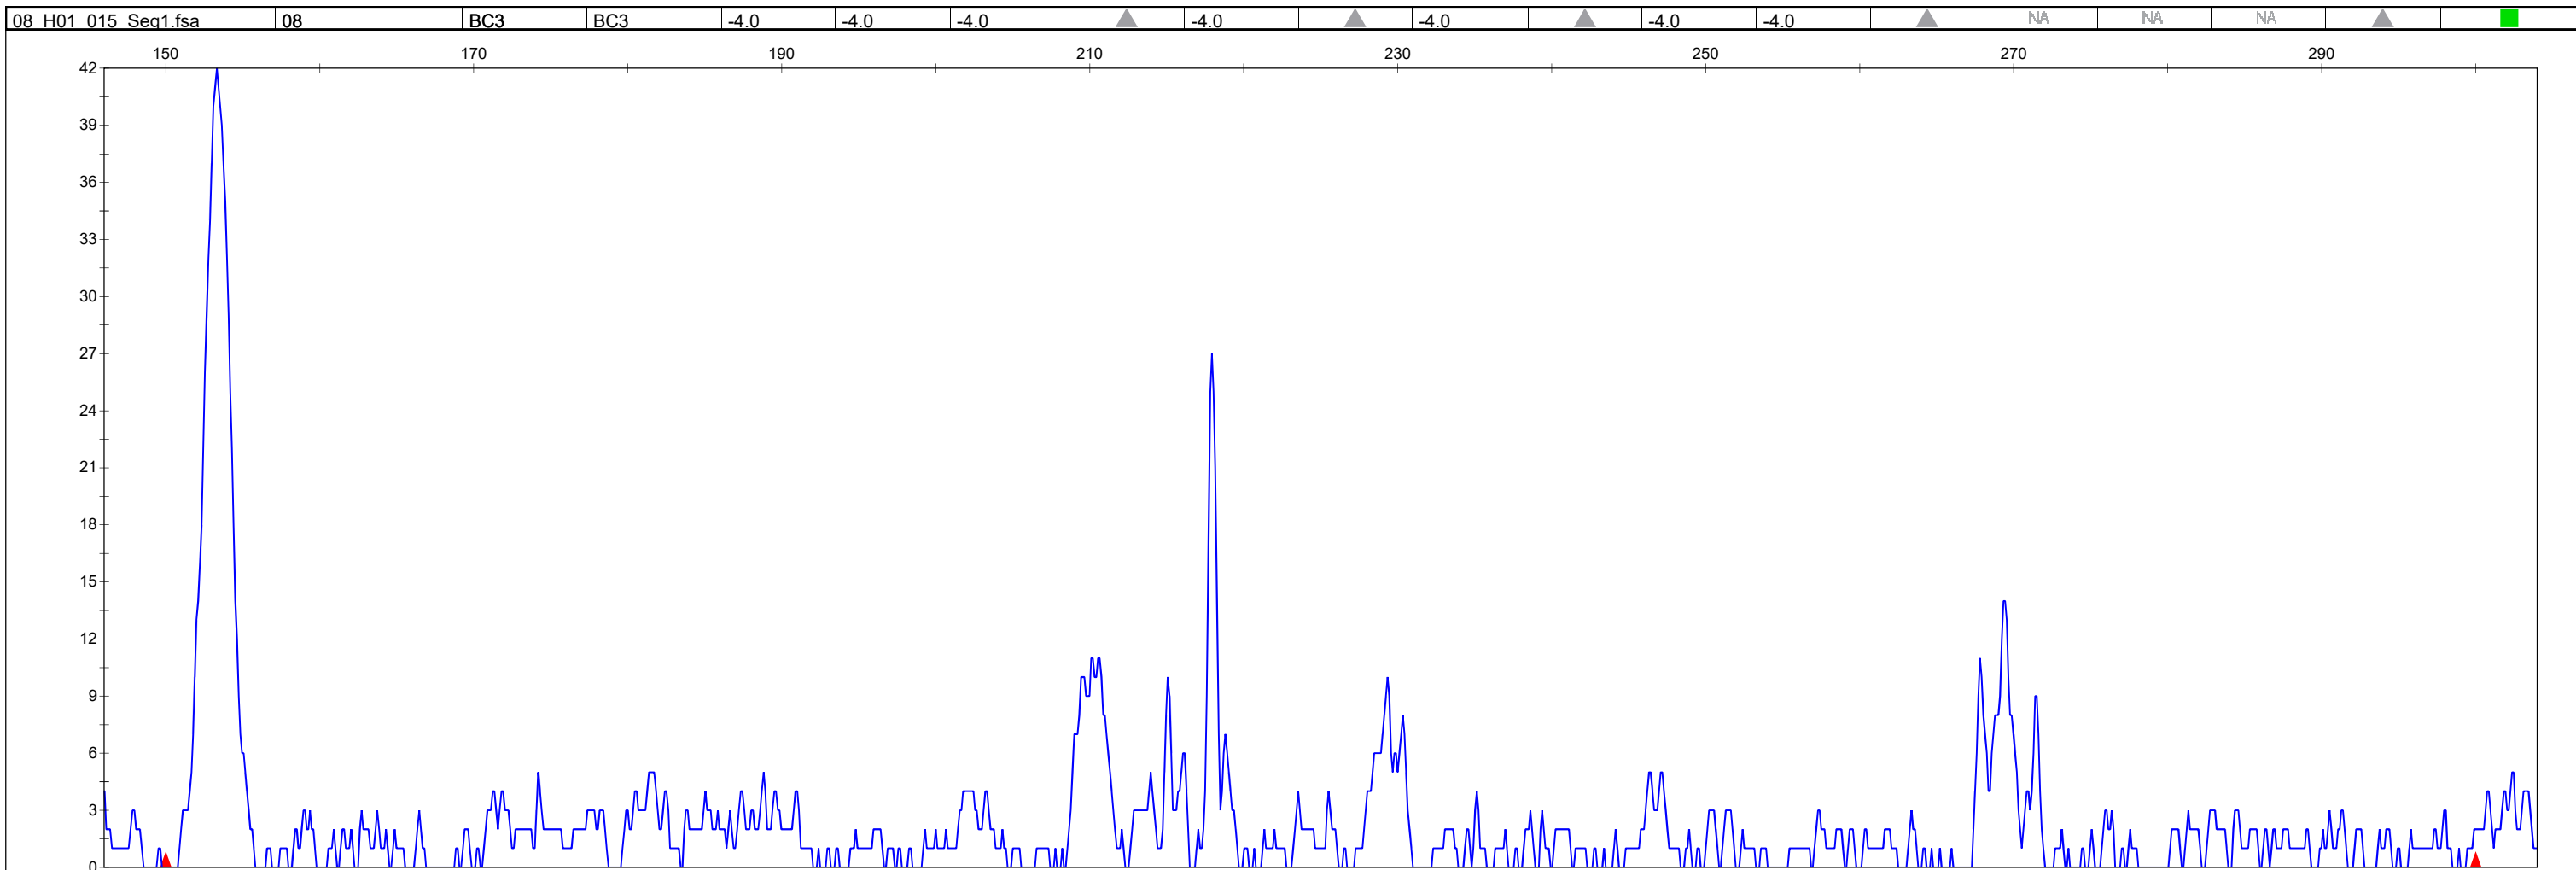

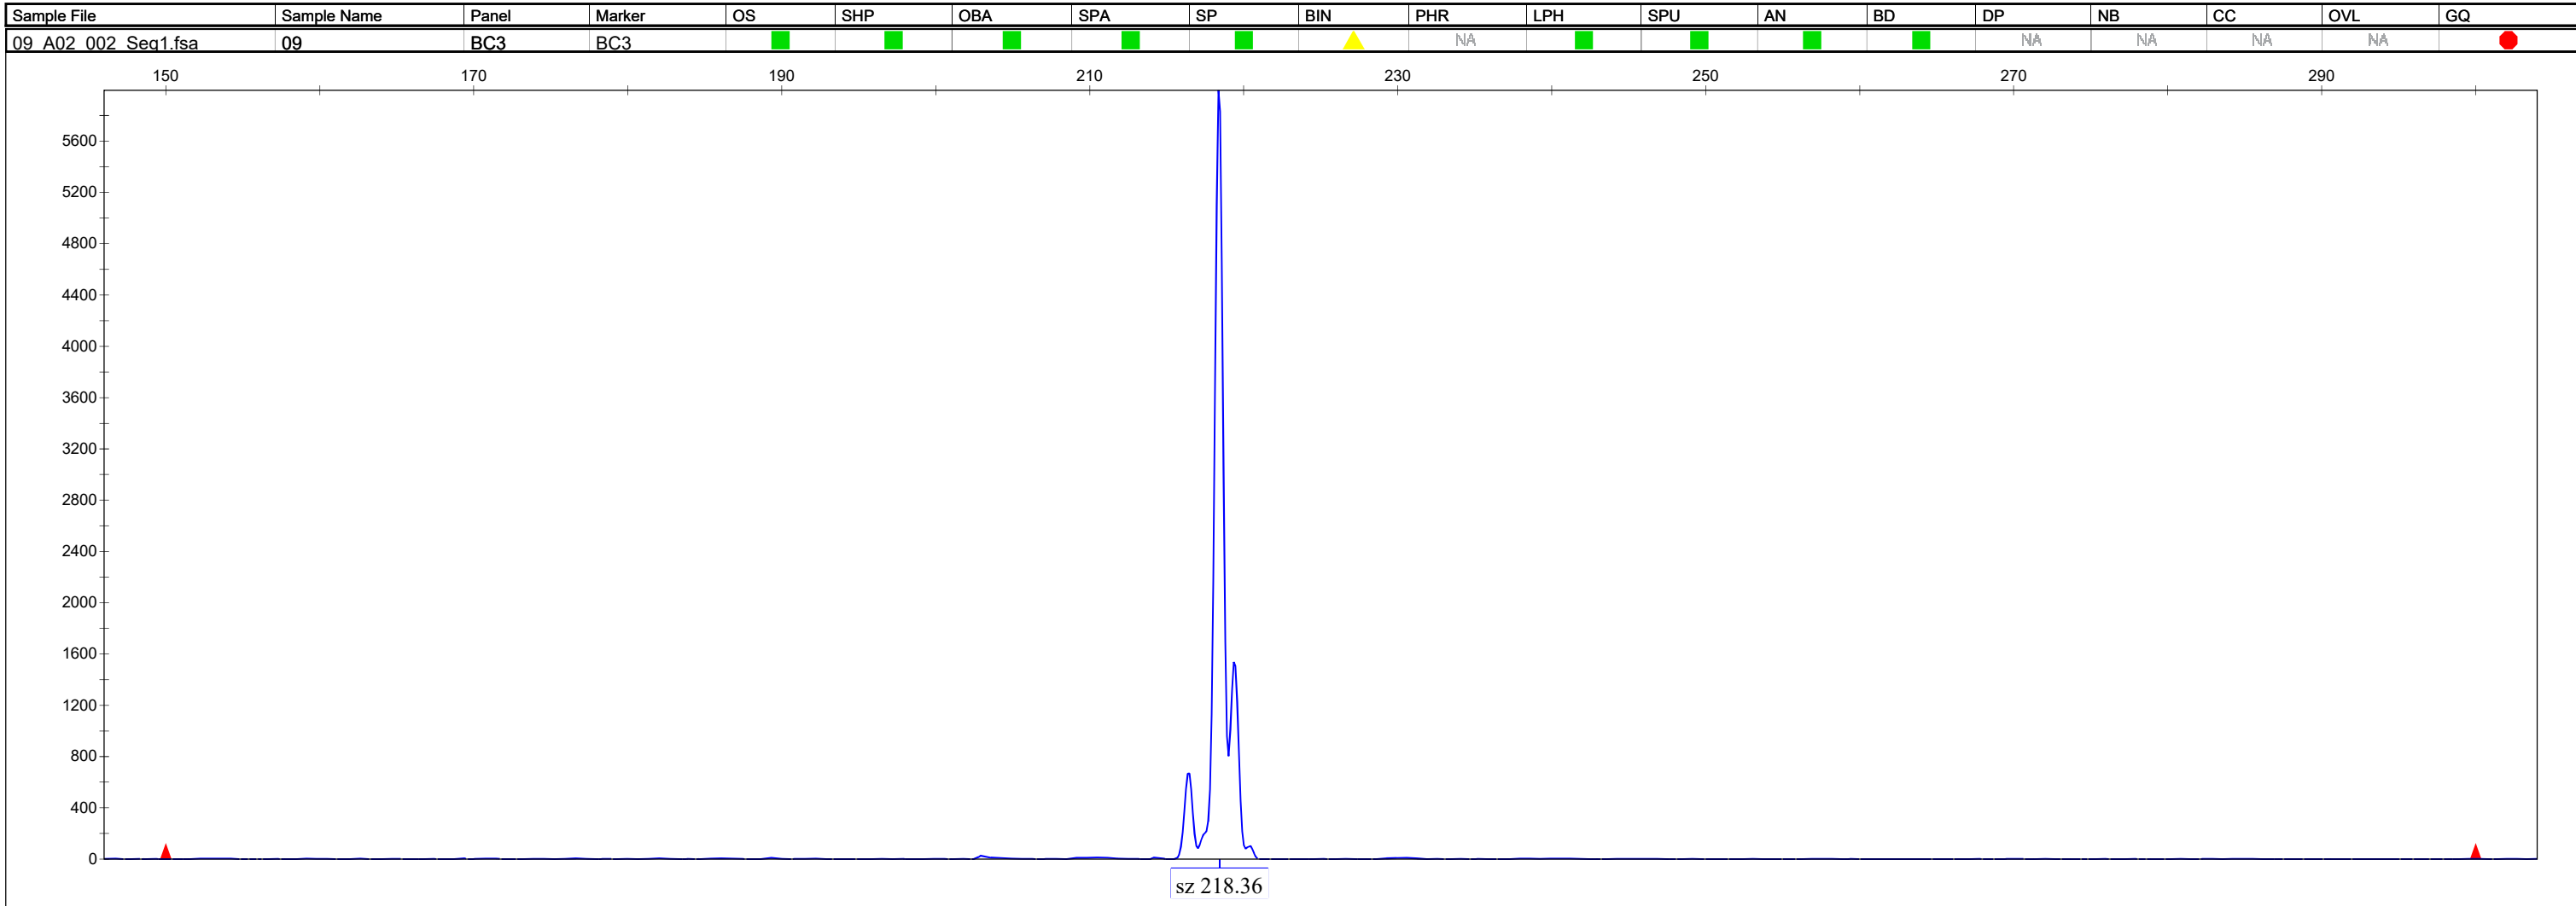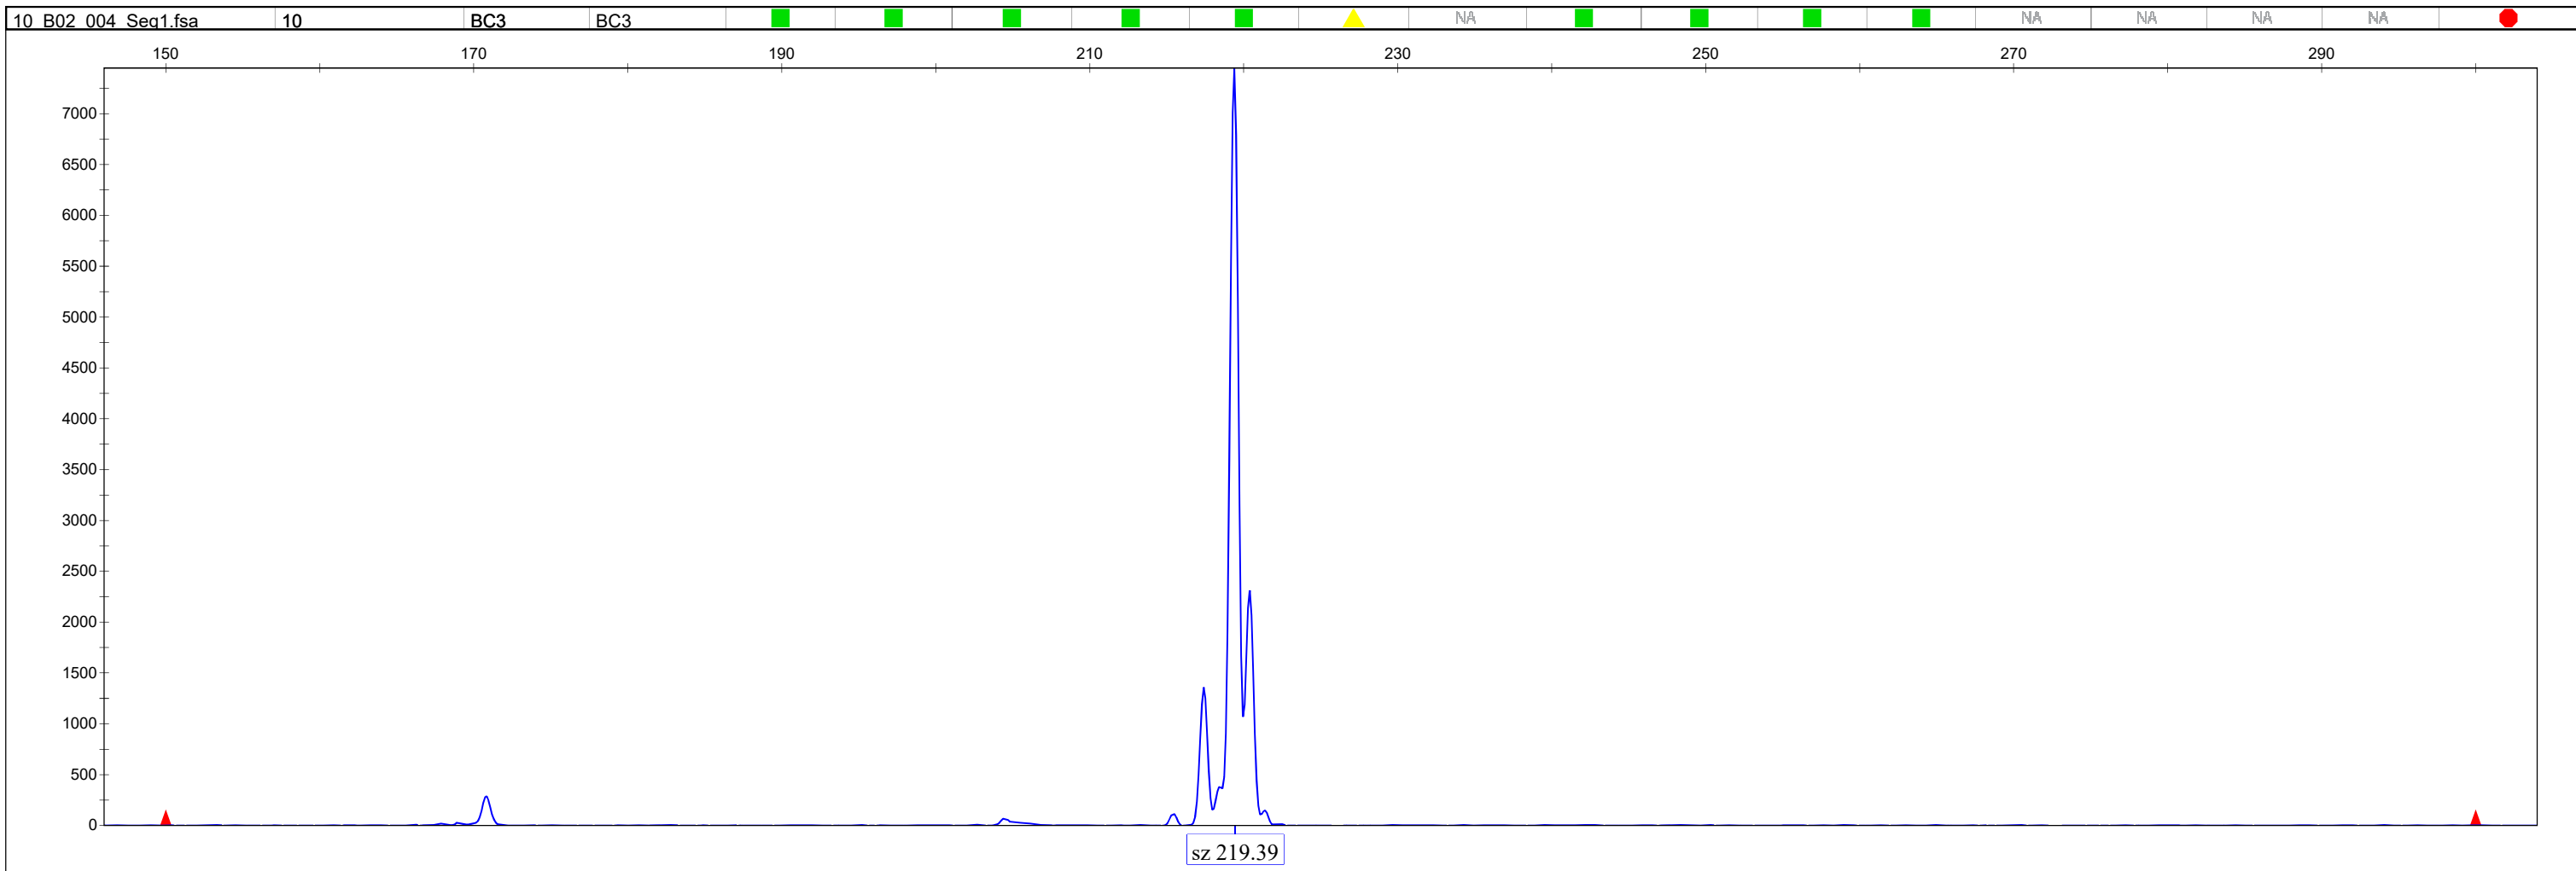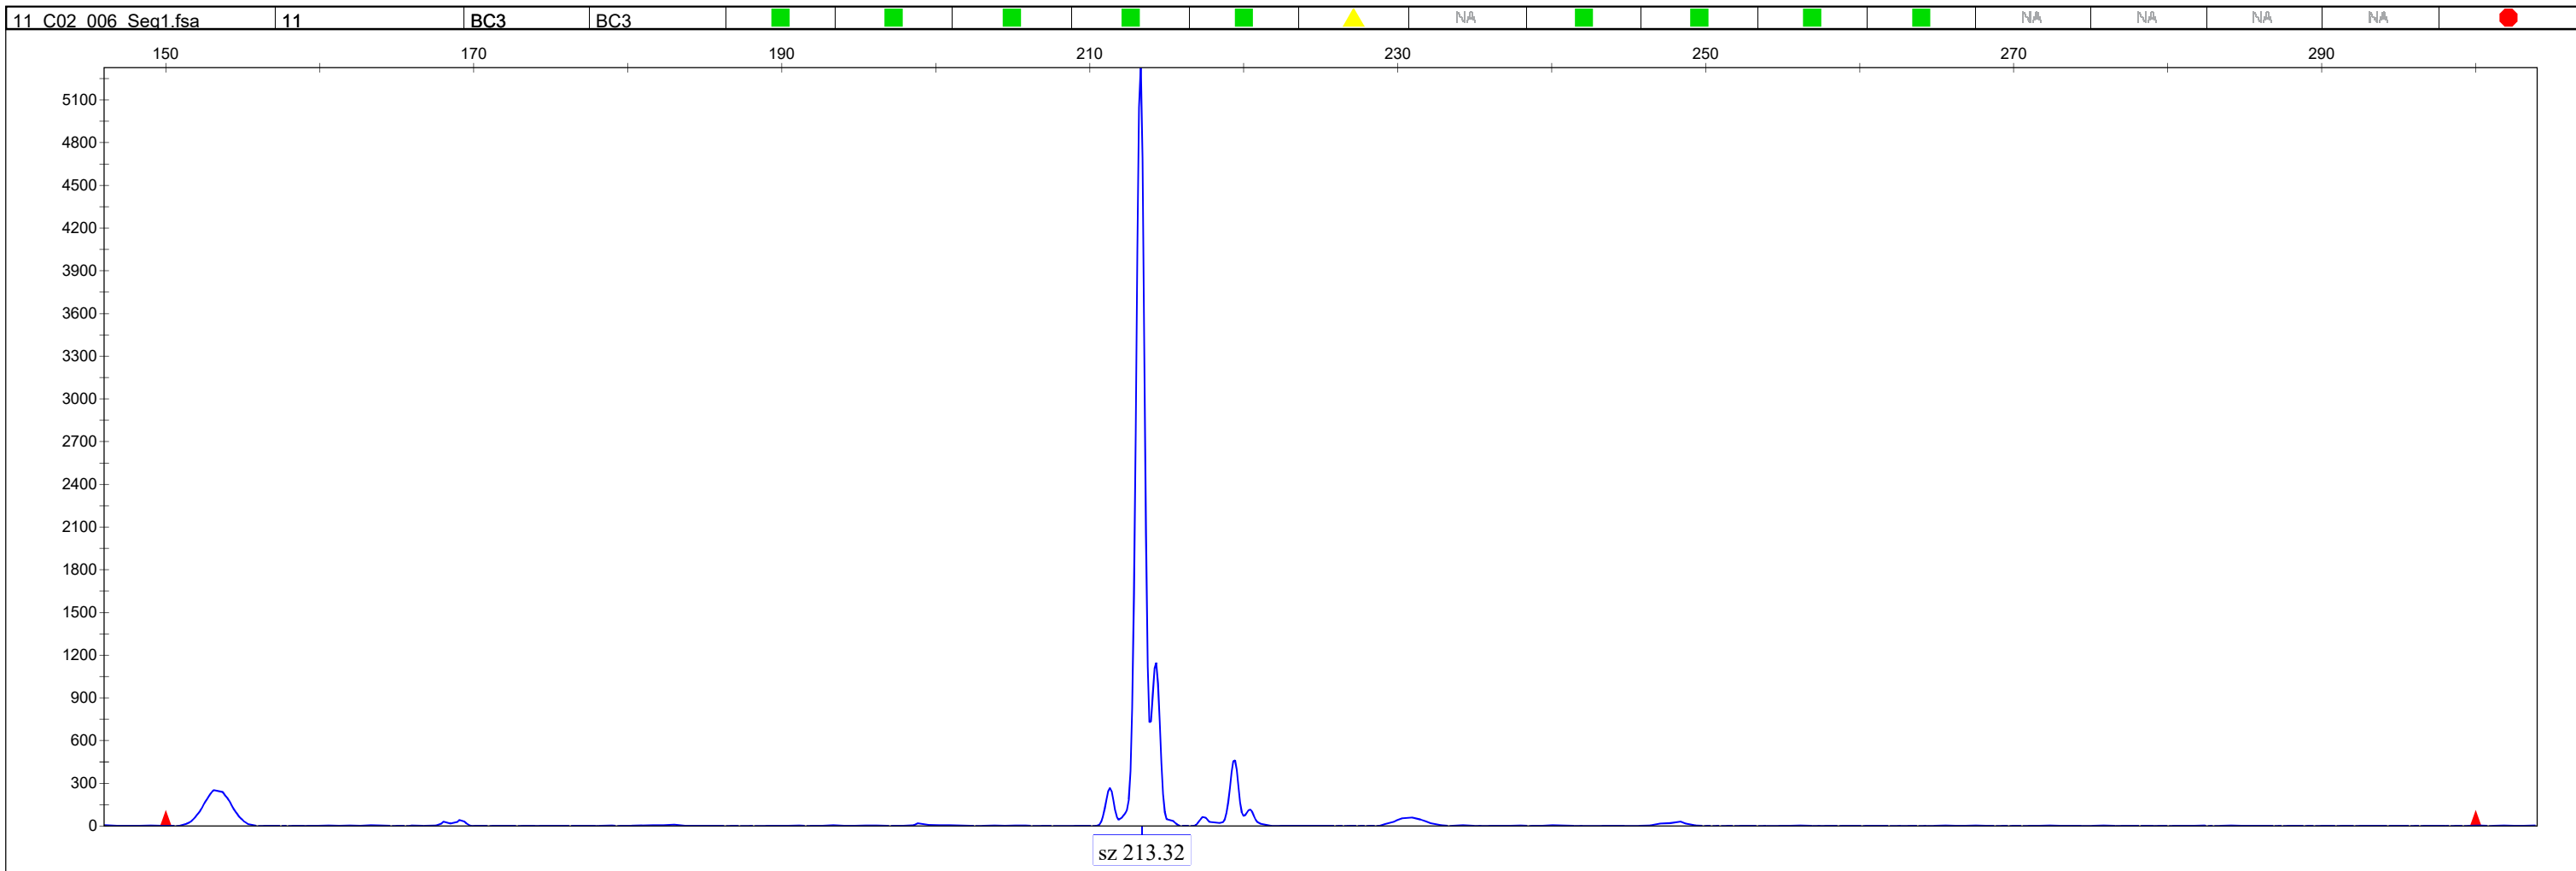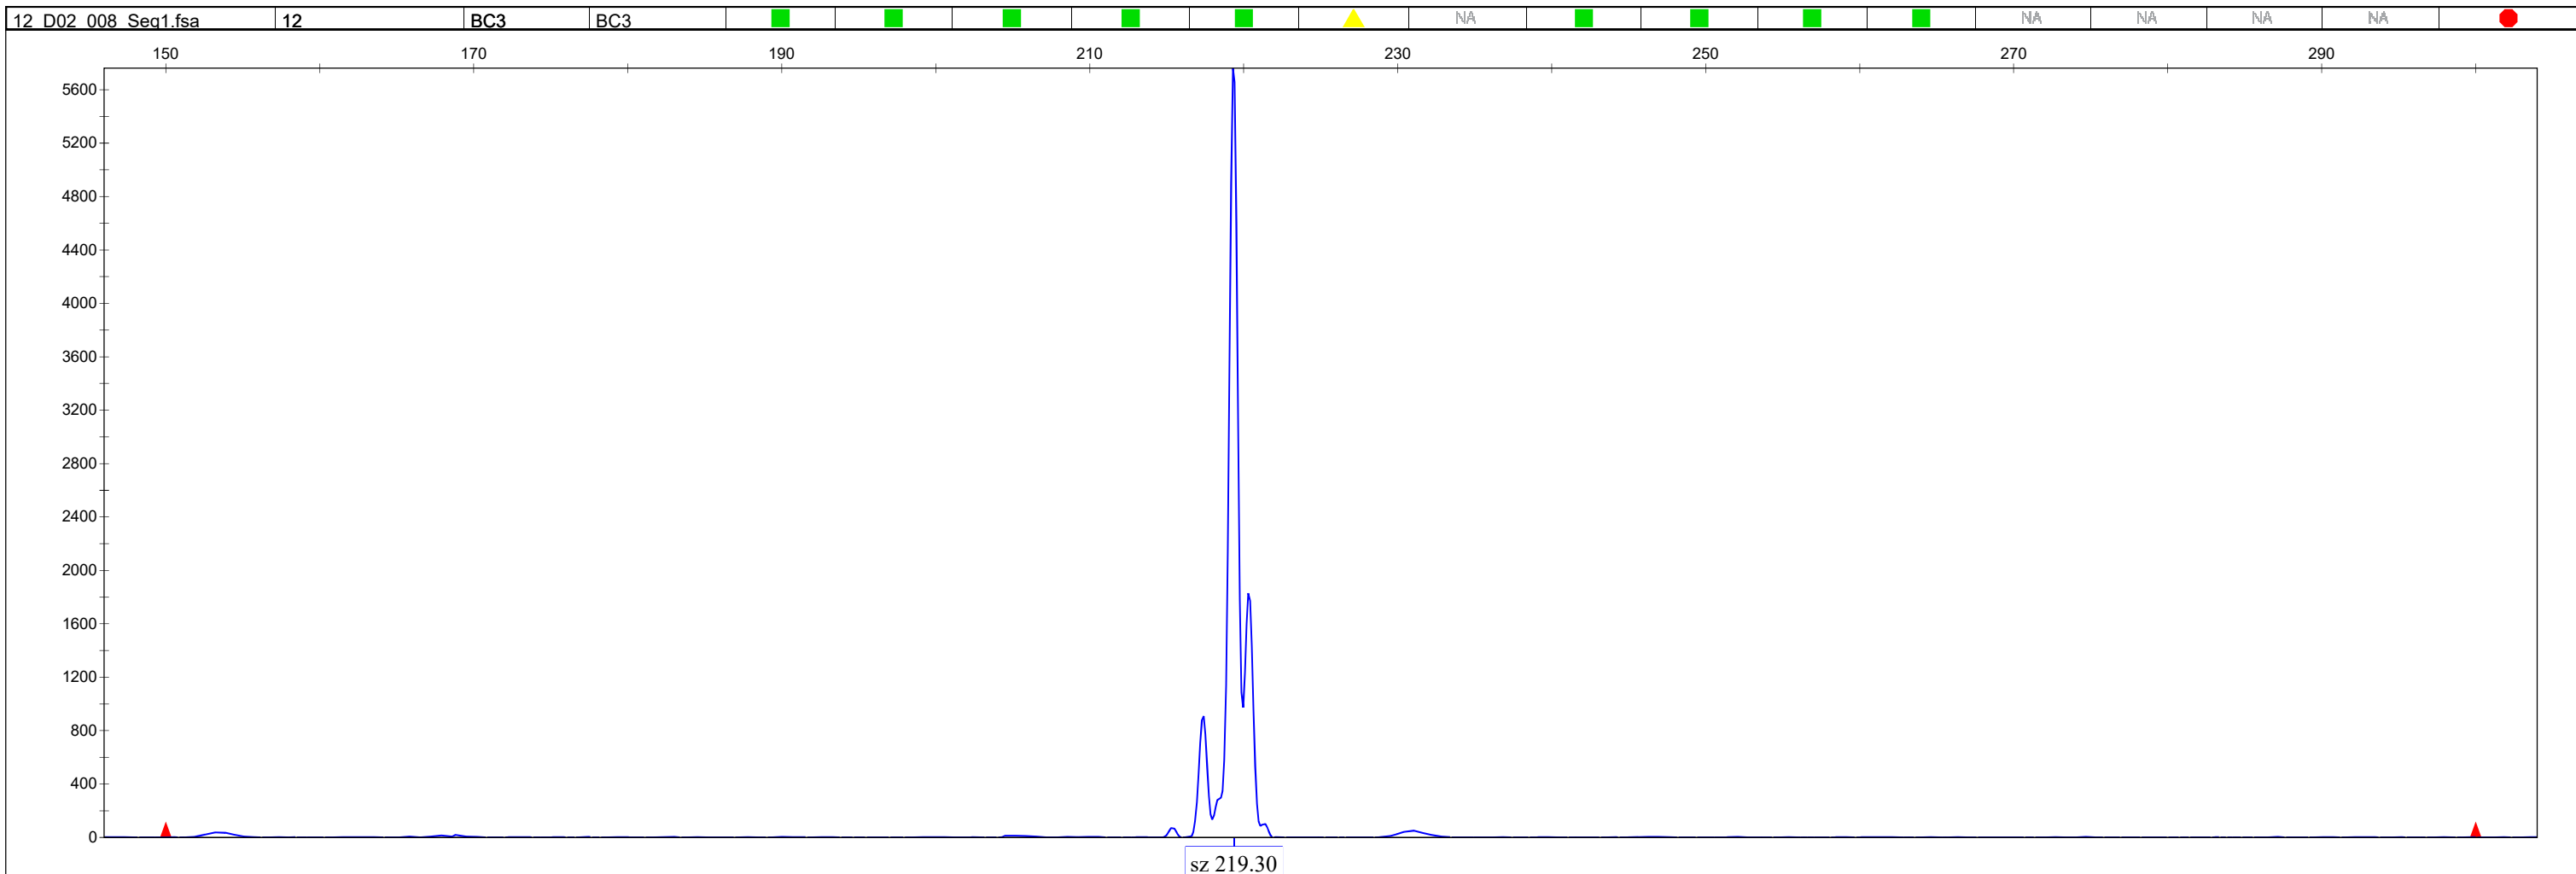

| Sample File | Sample Name | Panel | Marker | OS | SHP | OBA | SPA | SP | BIN | PHR | LPH | SPU | AN | BD | DP | NB | CC | OVL | GQ |
|-------------|-------------|-------|--------|----|-----|-----|-----|----|-----|-----|-----|-----|----|----|----|----|----|-----|----|
|-------------|-------------|-------|--------|----|-----|-----|-----|----|-----|-----|-----|-----|----|----|----|----|----|-----|----|

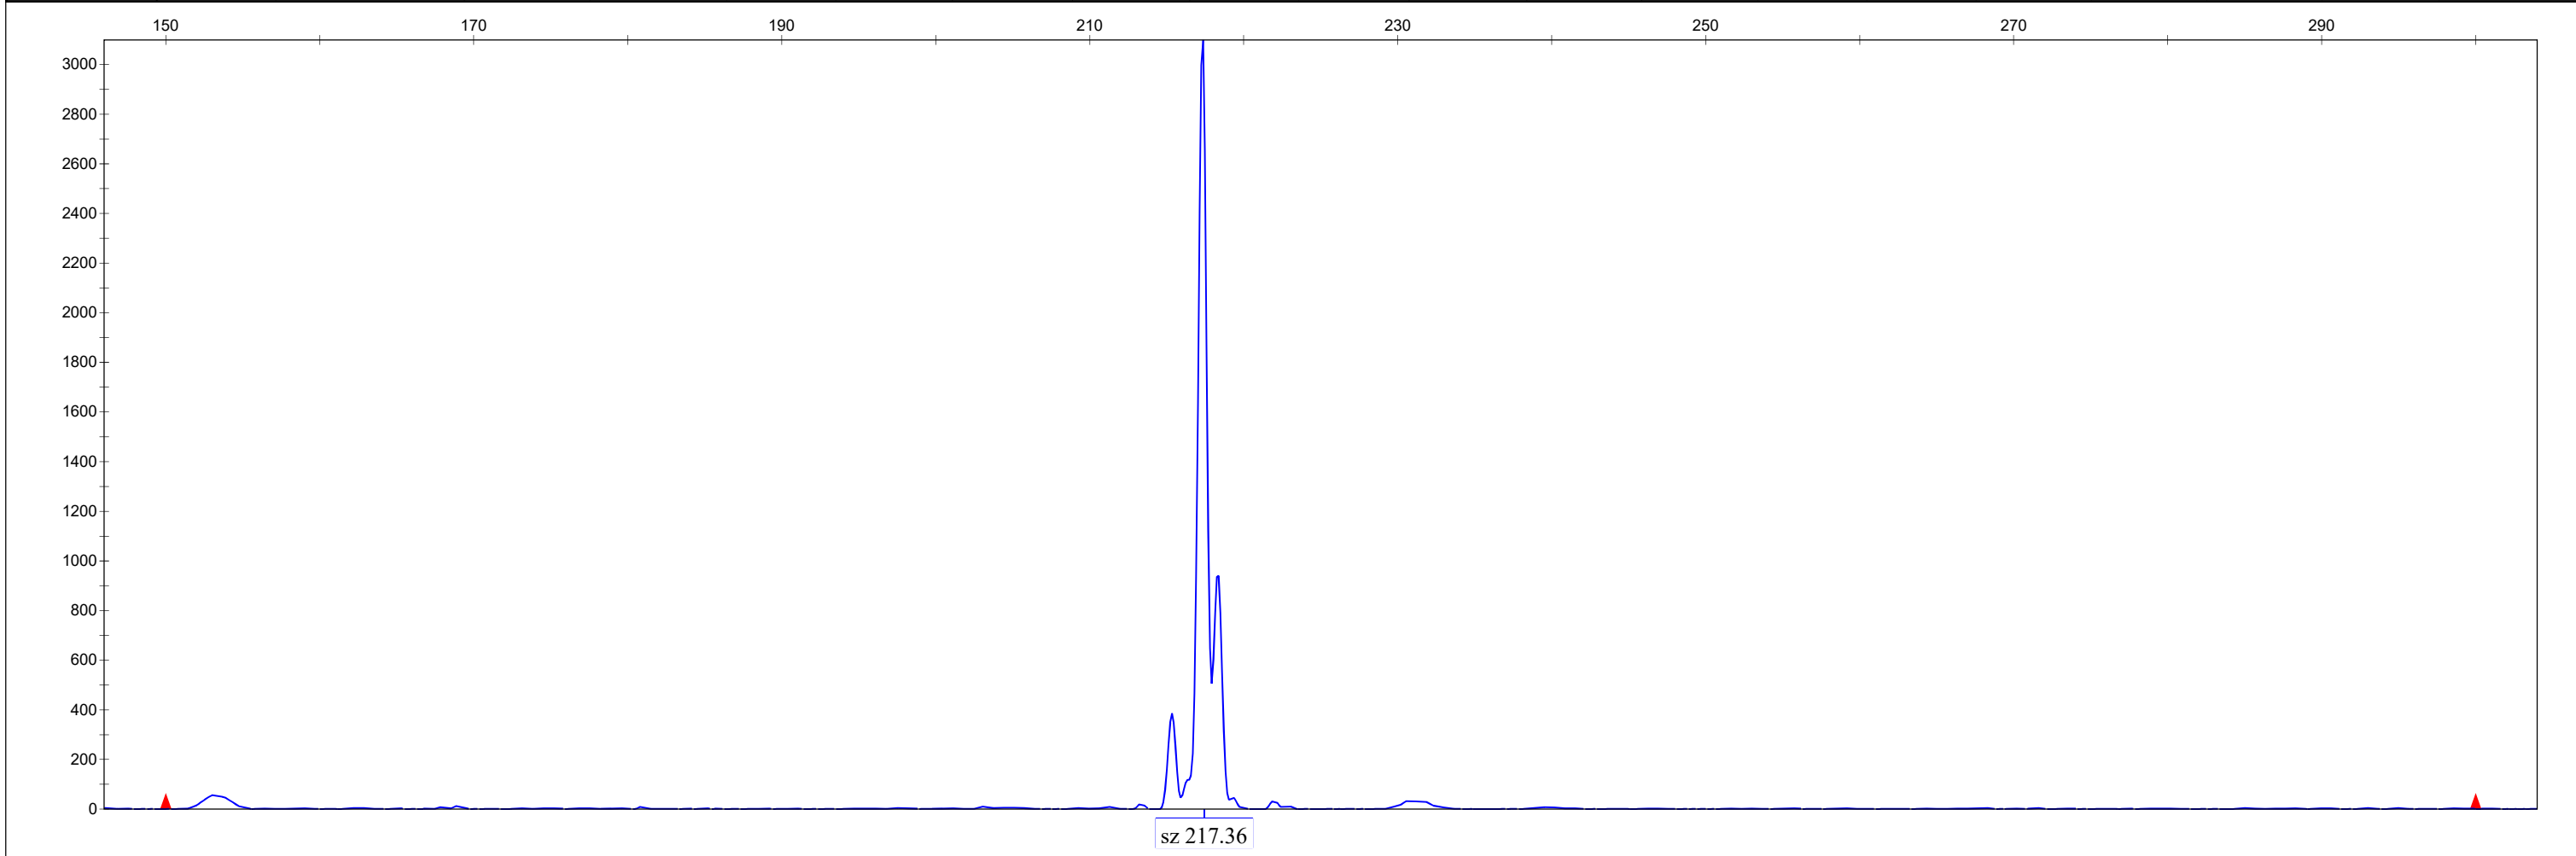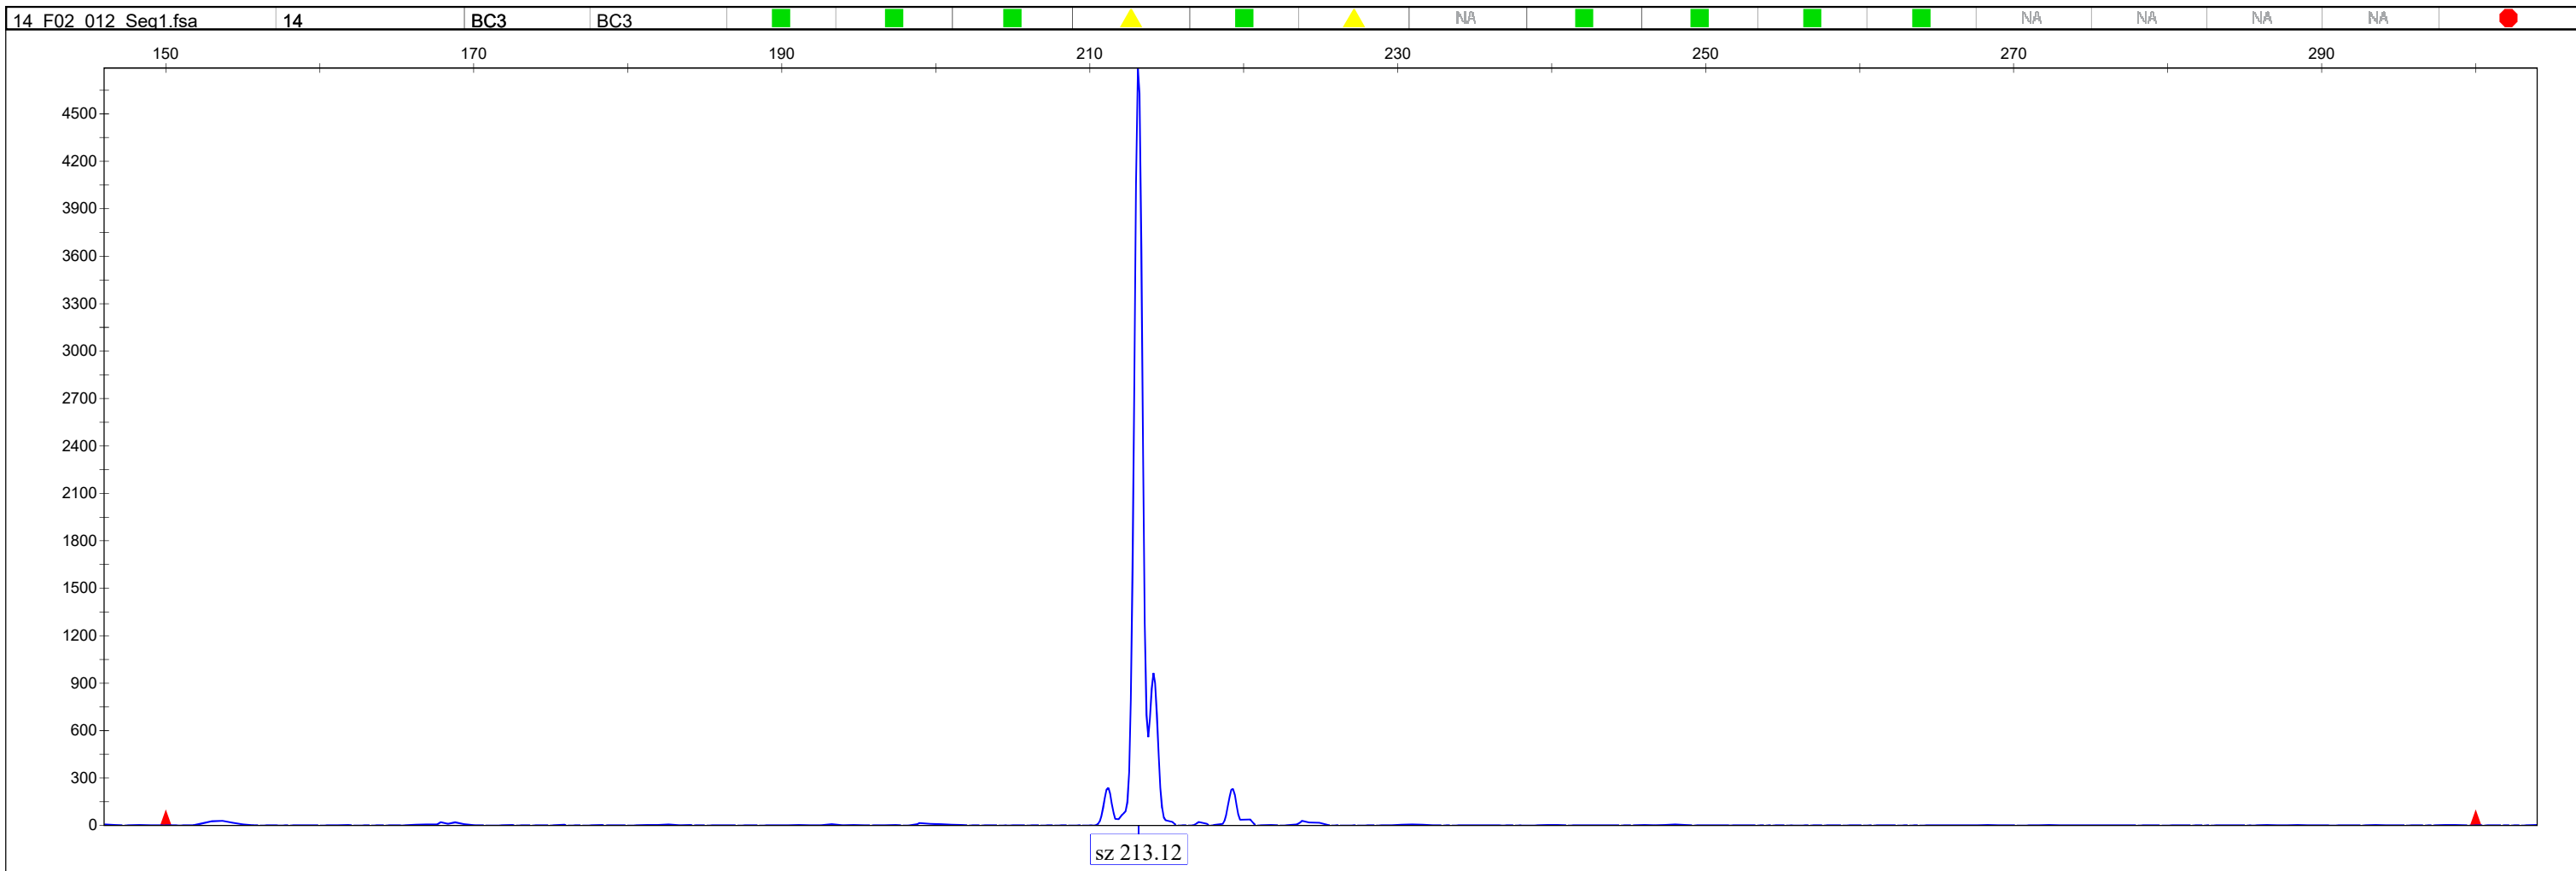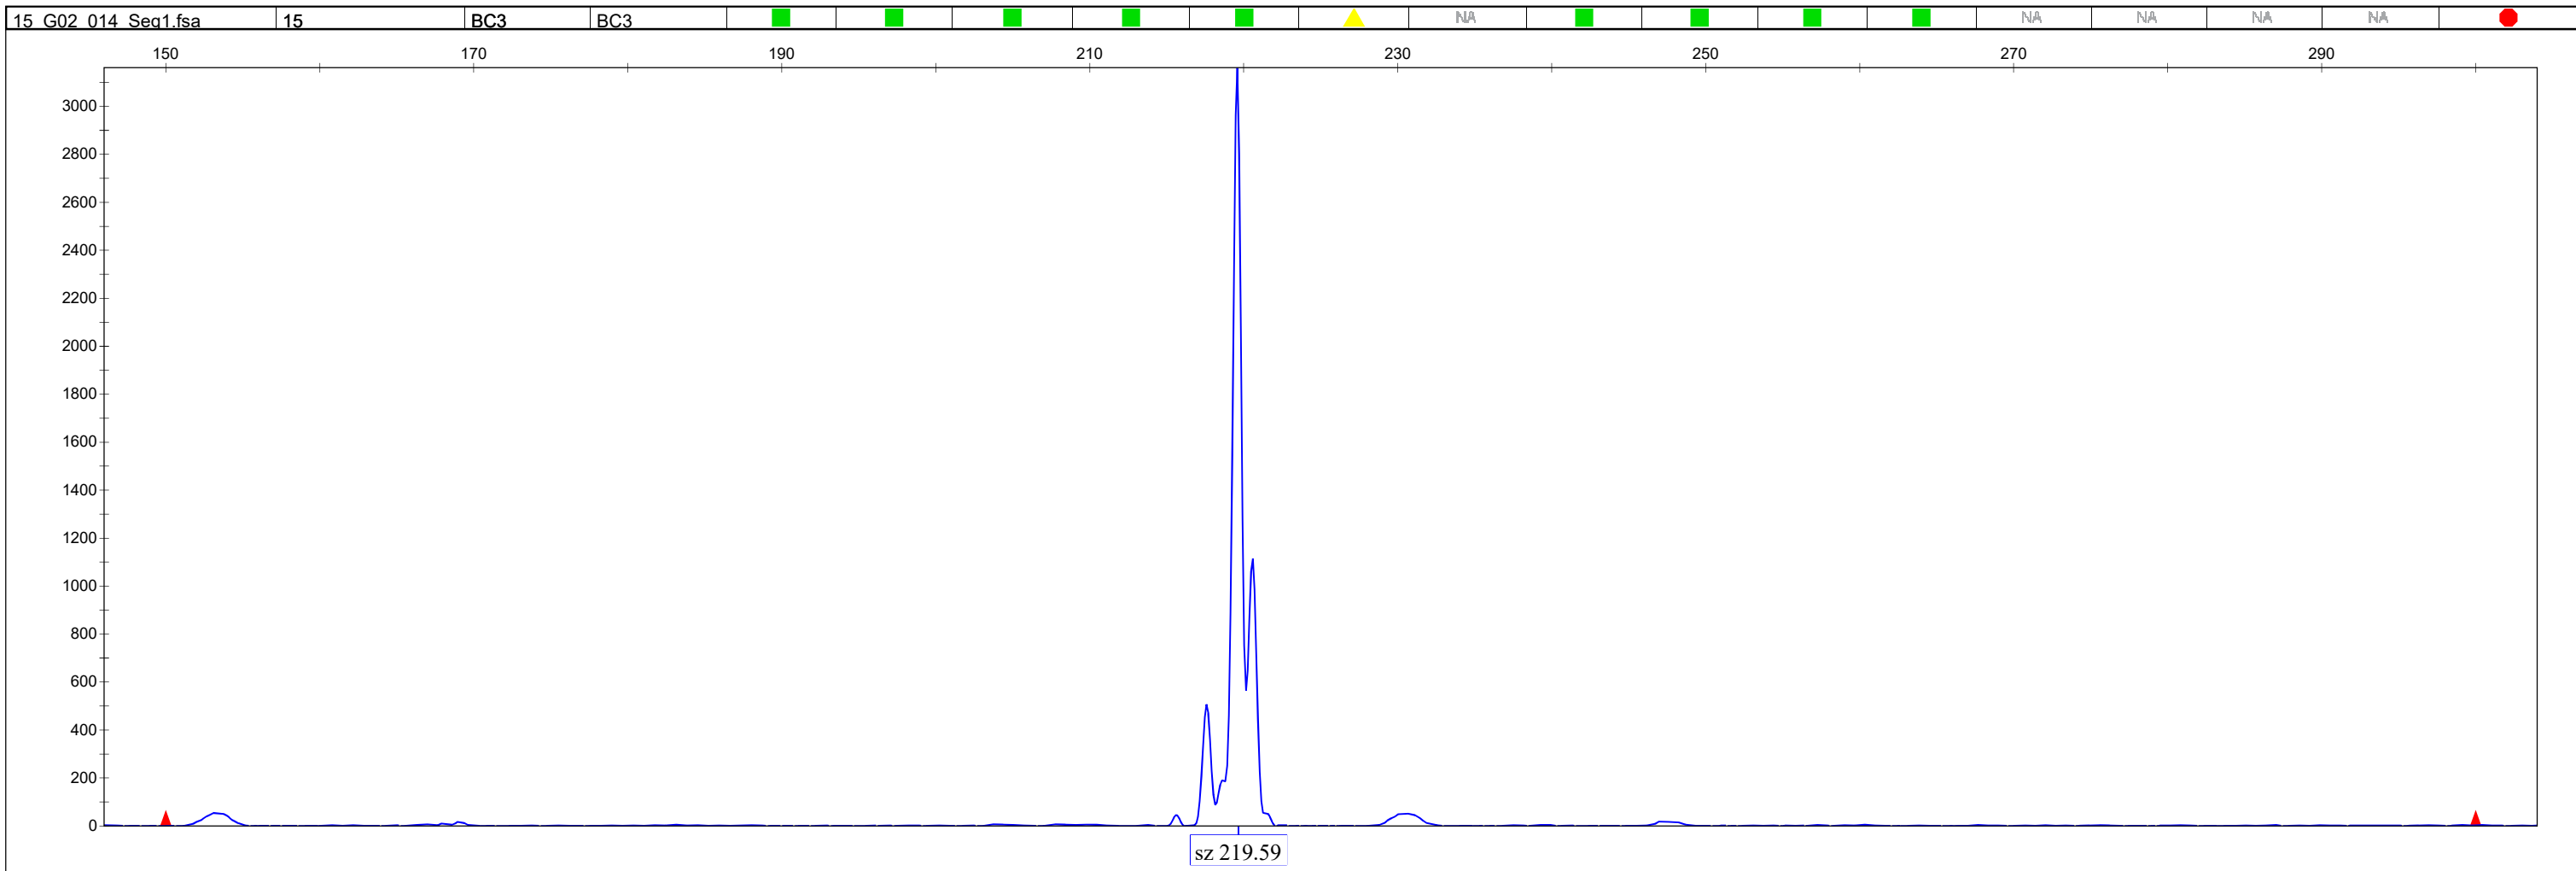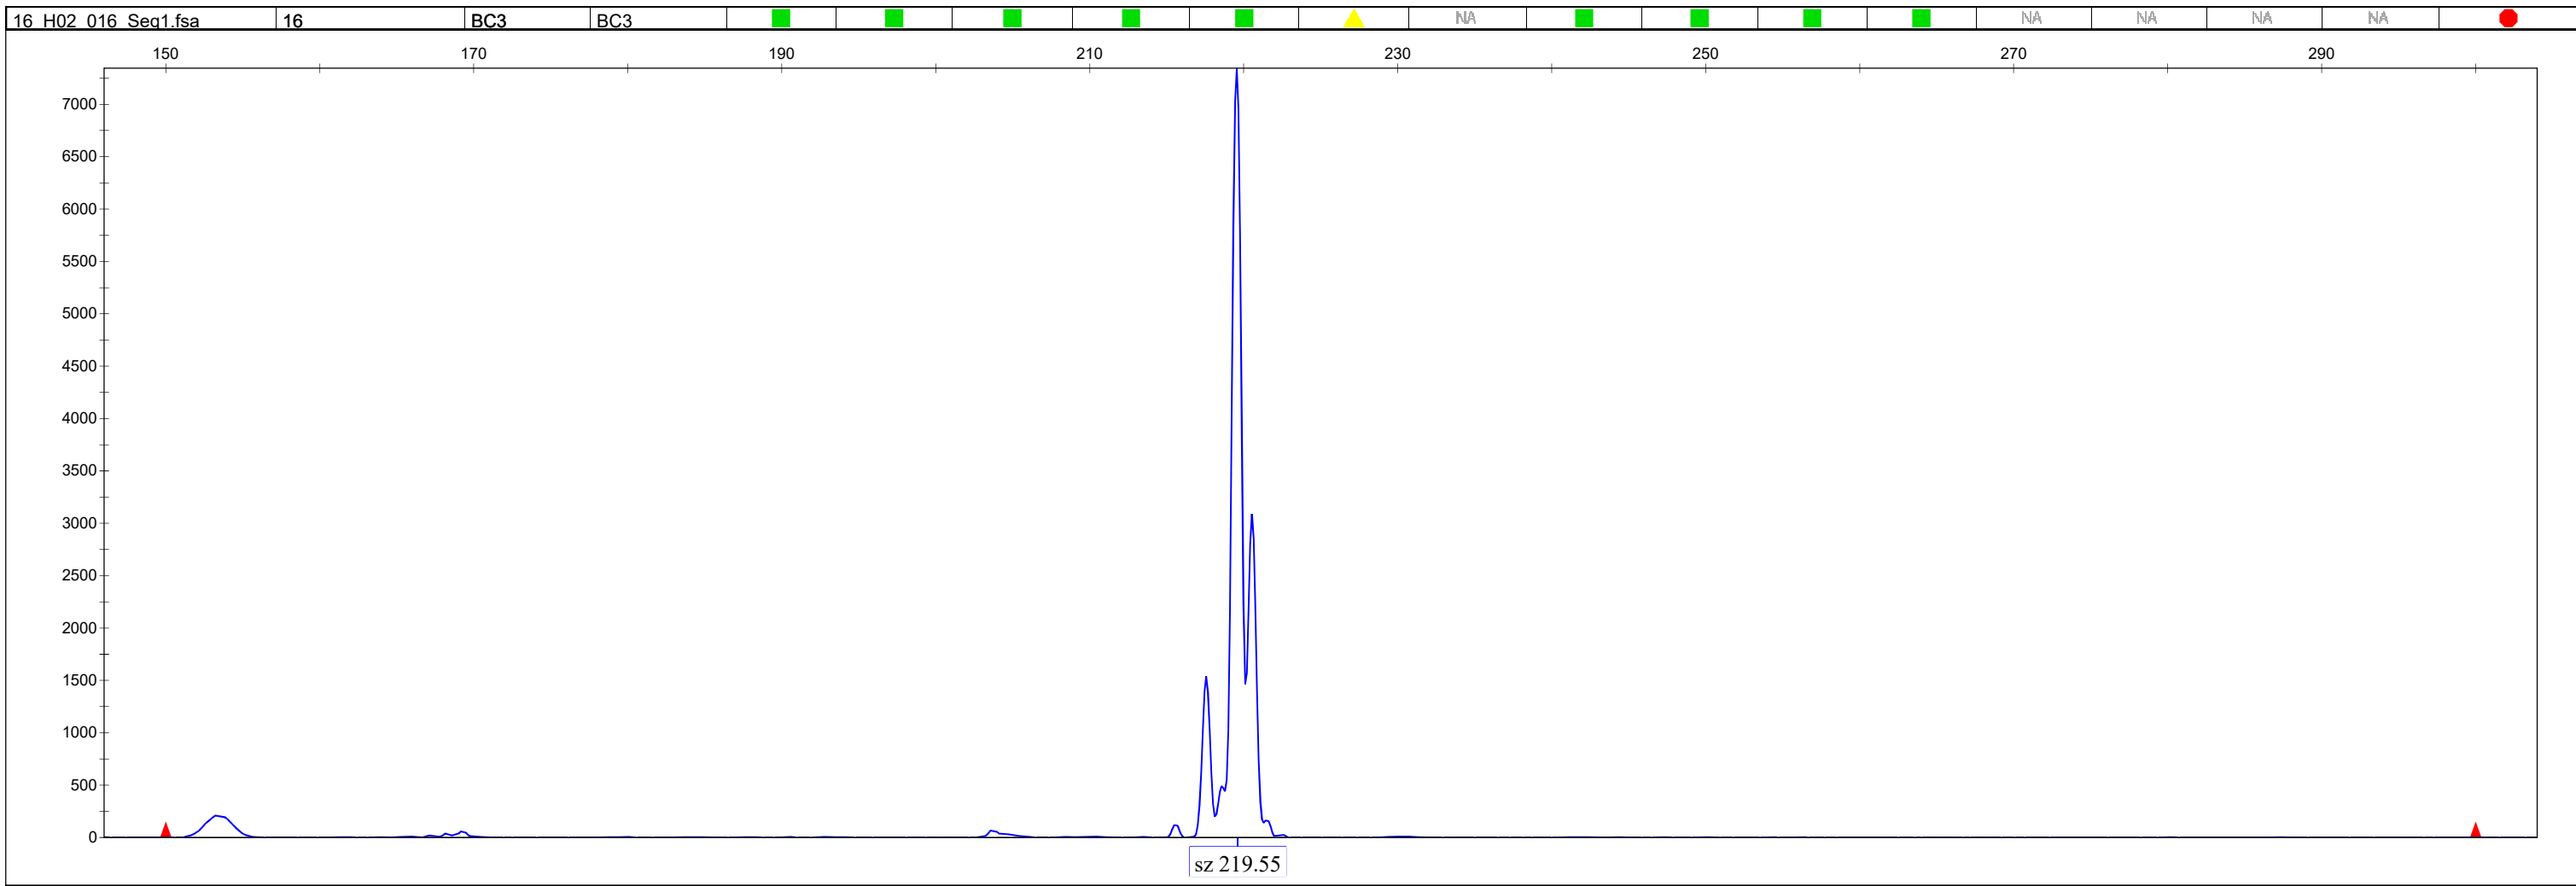

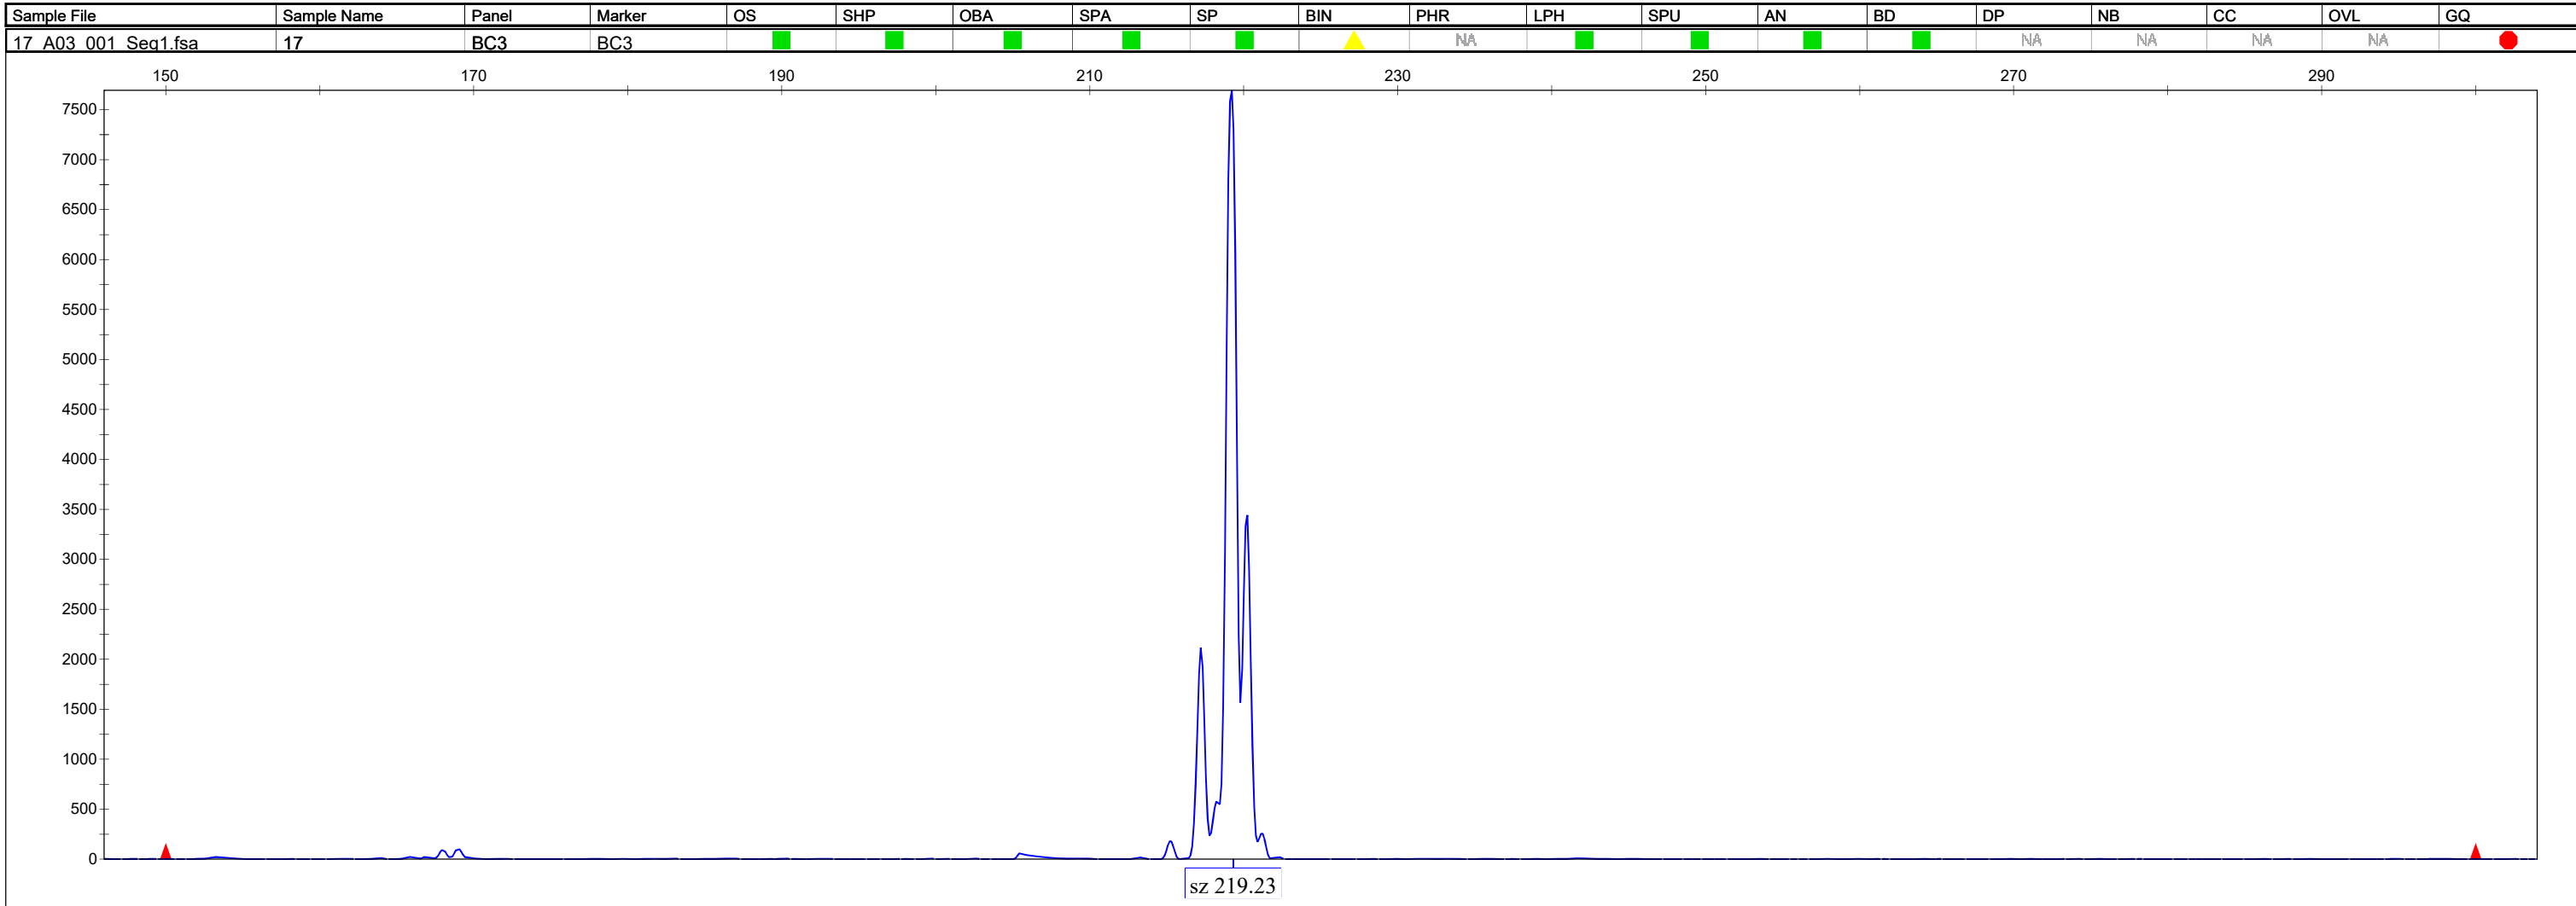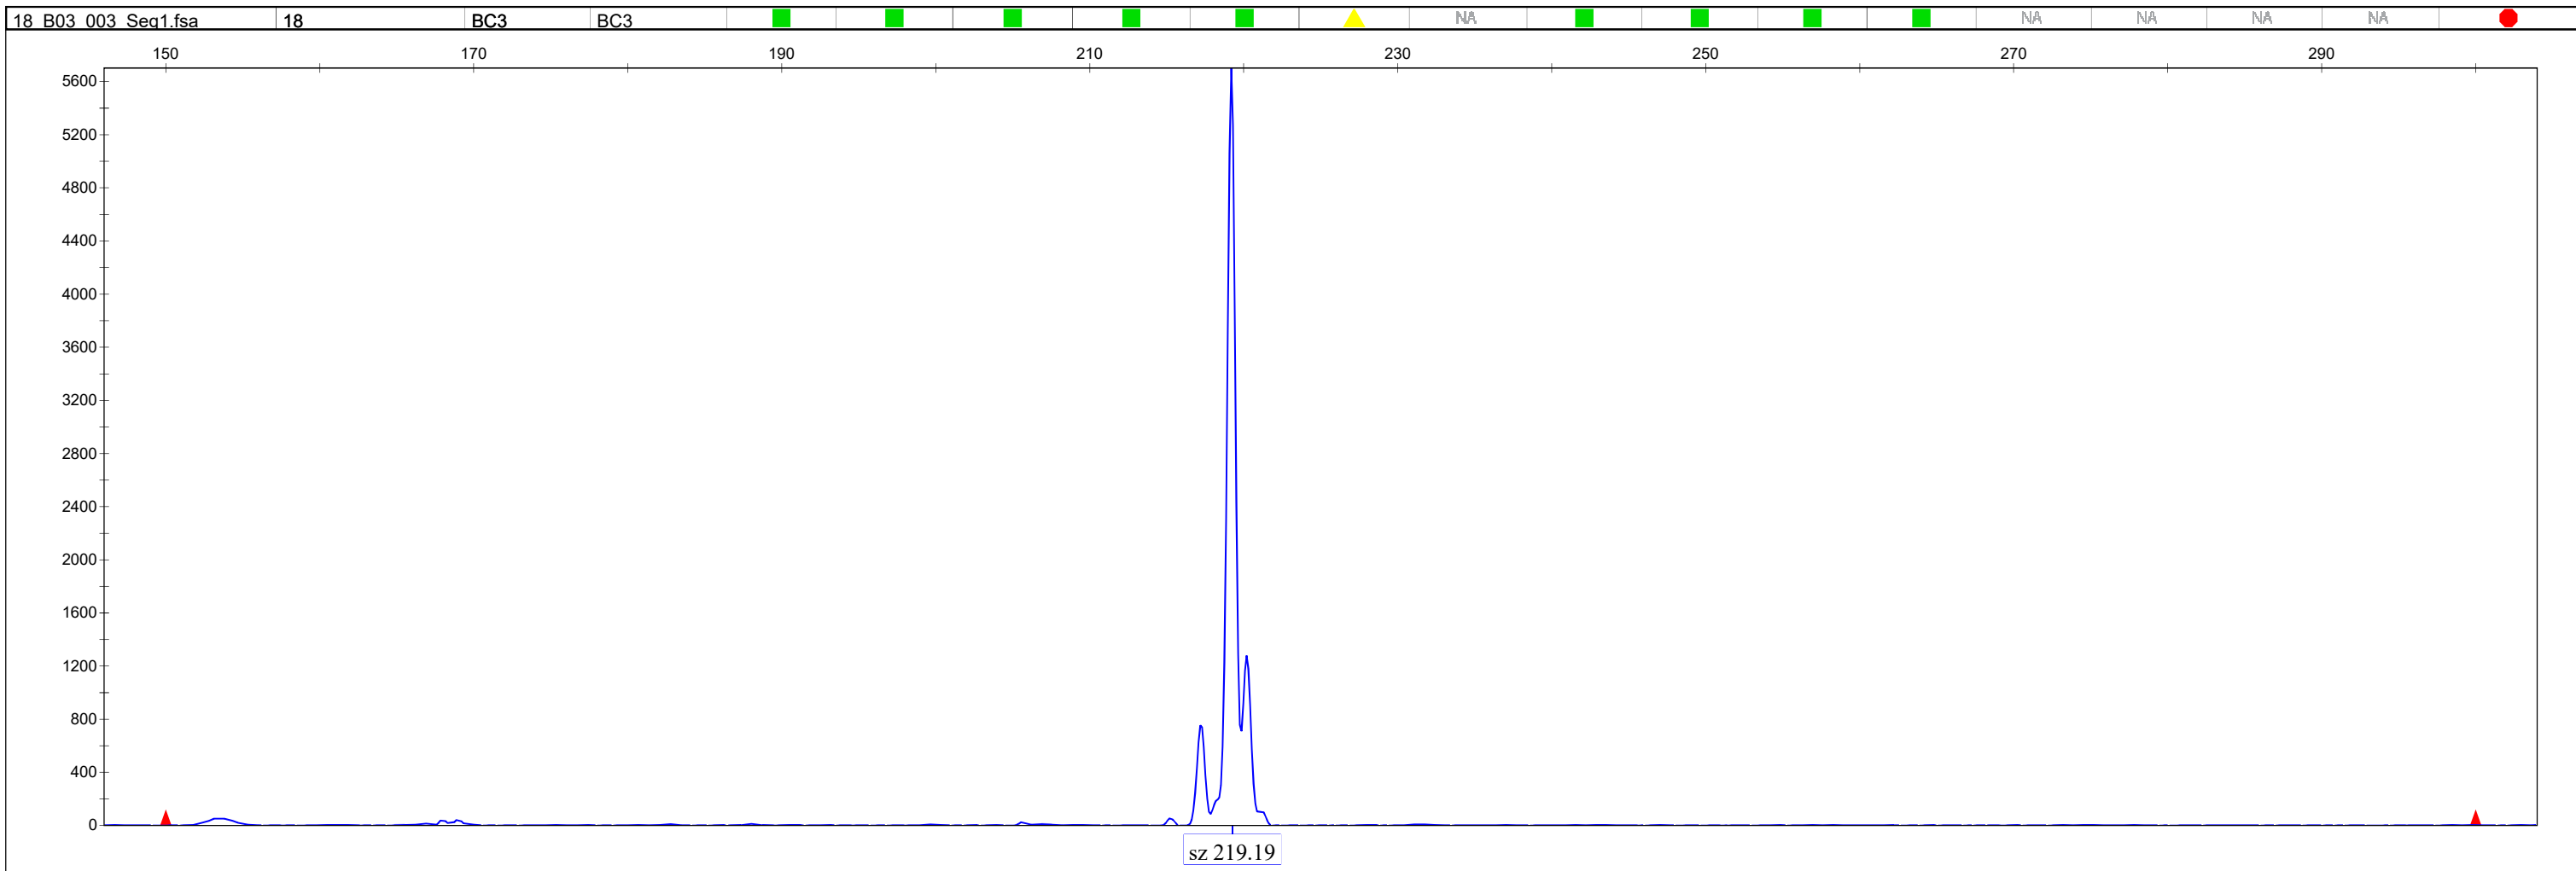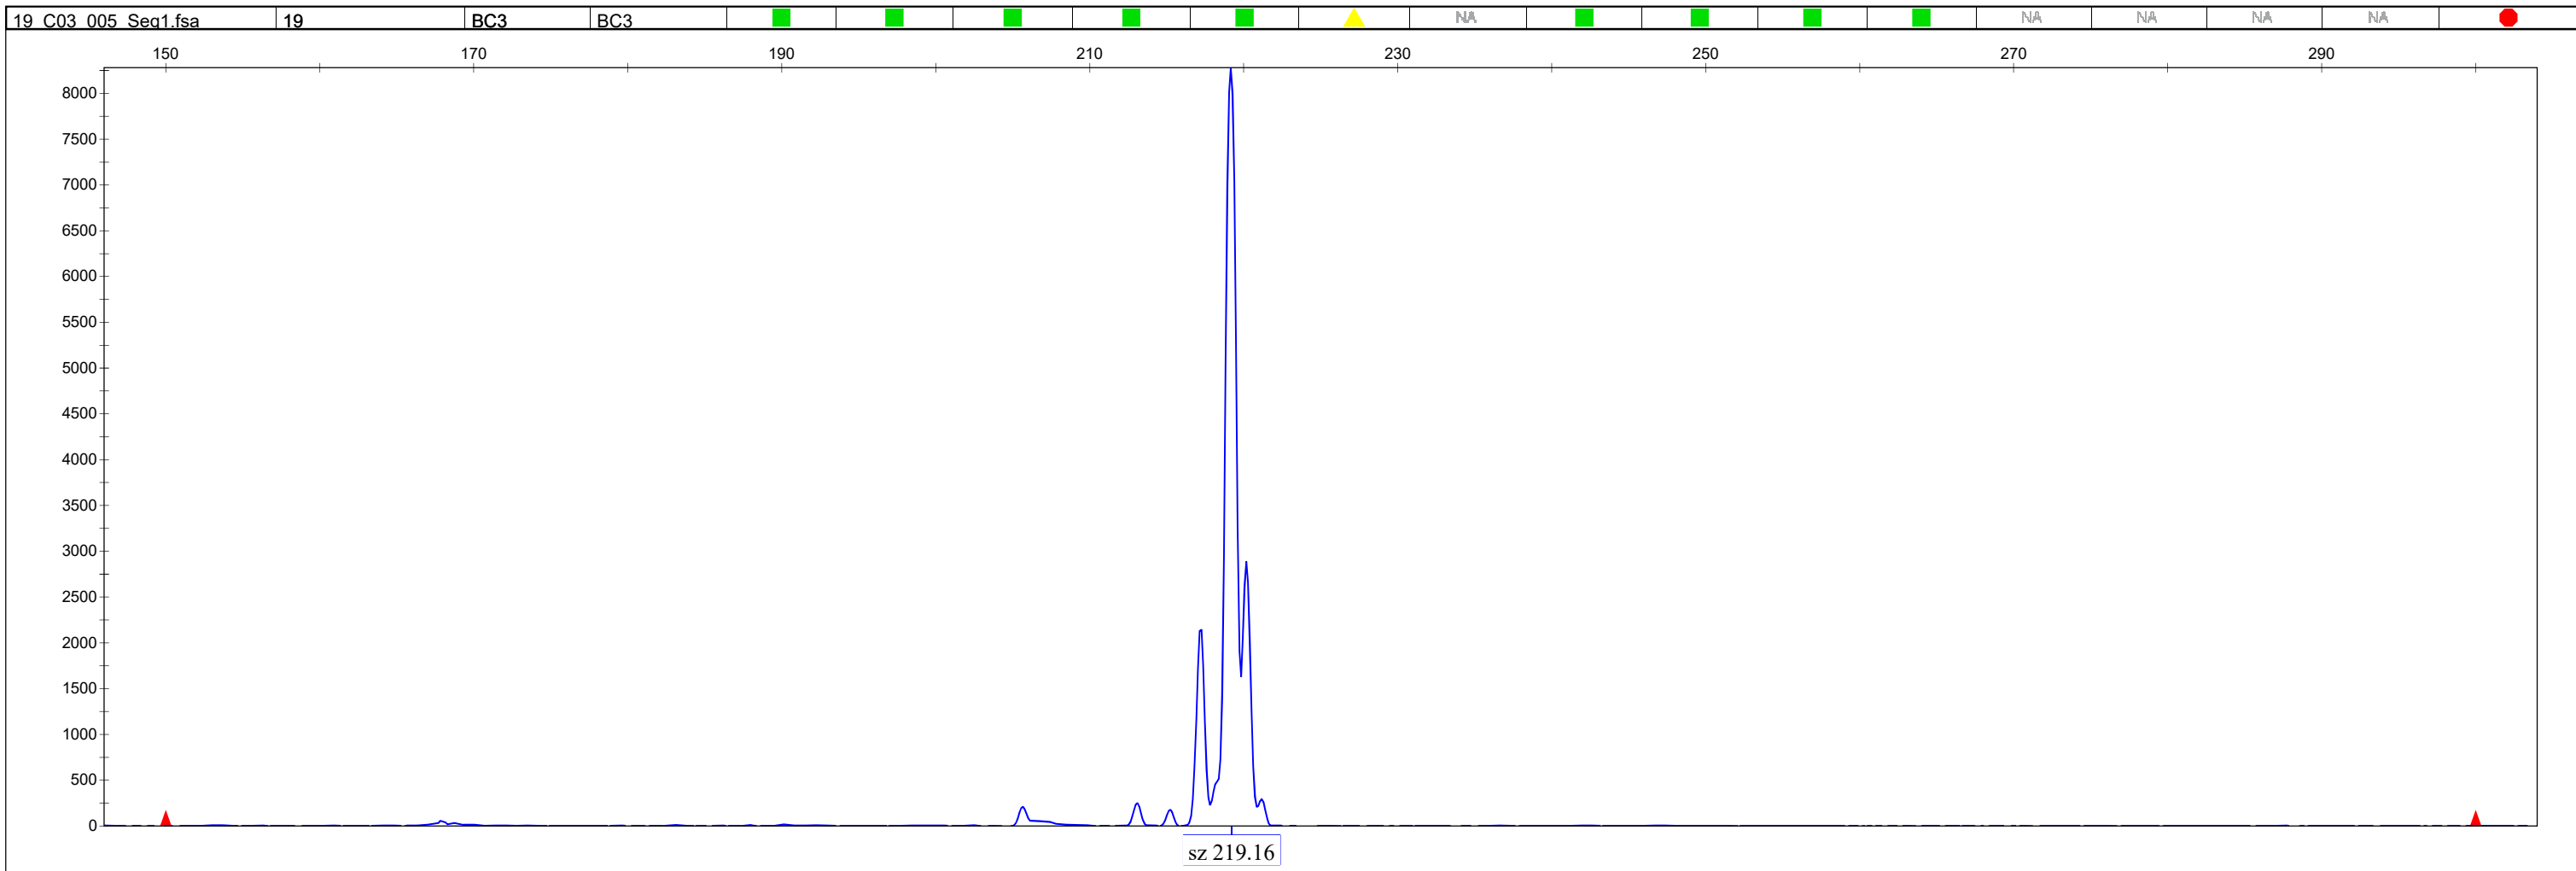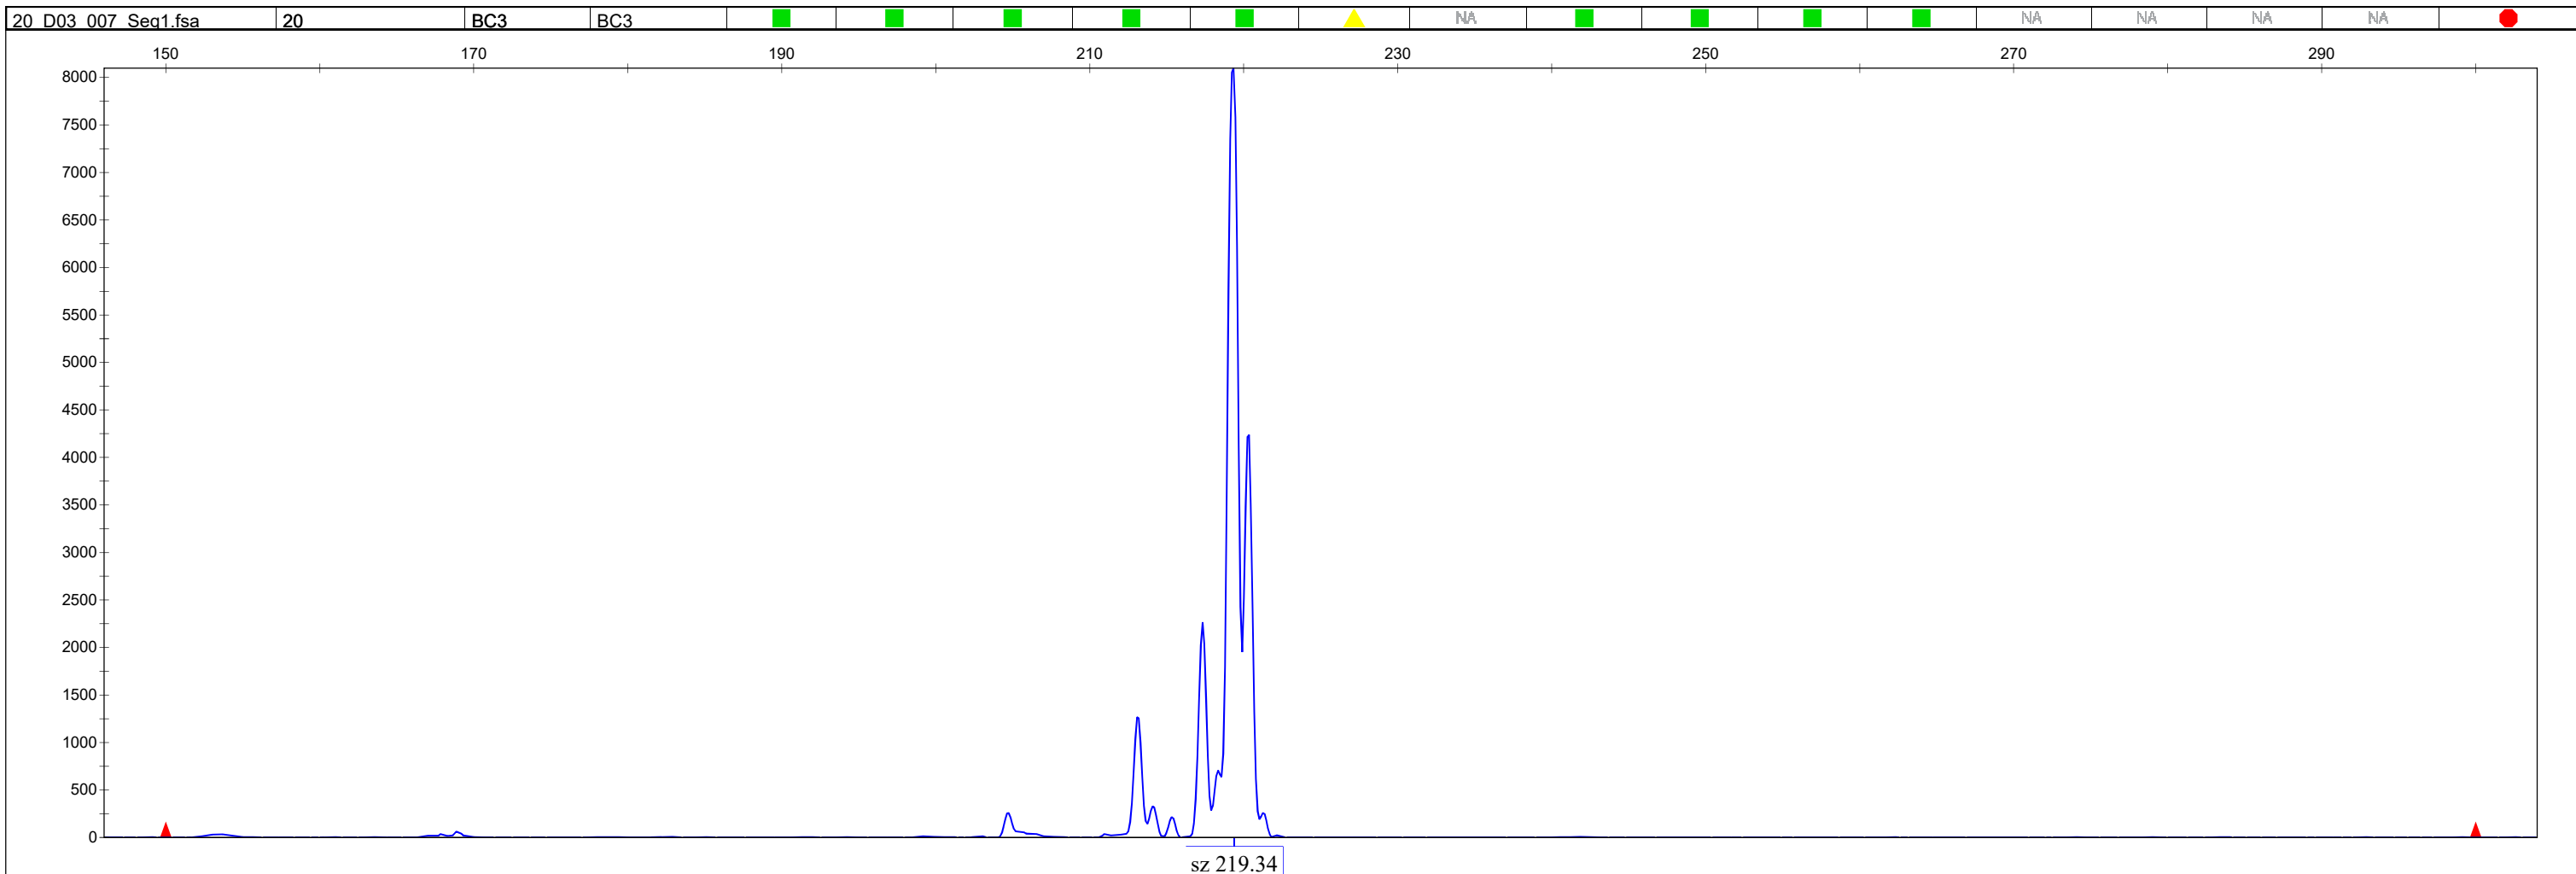

| Sample File         | Sample Name | Panel | Marker | OS | SHP | OBA | SPA | SP | BIN | PHR | LPH | SPU | AN | BD | DP | NB | CC | OVL | GQ |
|---------------------|-------------|-------|--------|----|-----|-----|-----|----|-----|-----|-----|-----|----|----|----|----|----|-----|----|
| 21 E03_009 Seq1.fsa | 21          | BC3   | BC3    |    |     |     |     |    |     |     |     |     |    |    |    |    |    |     |    |

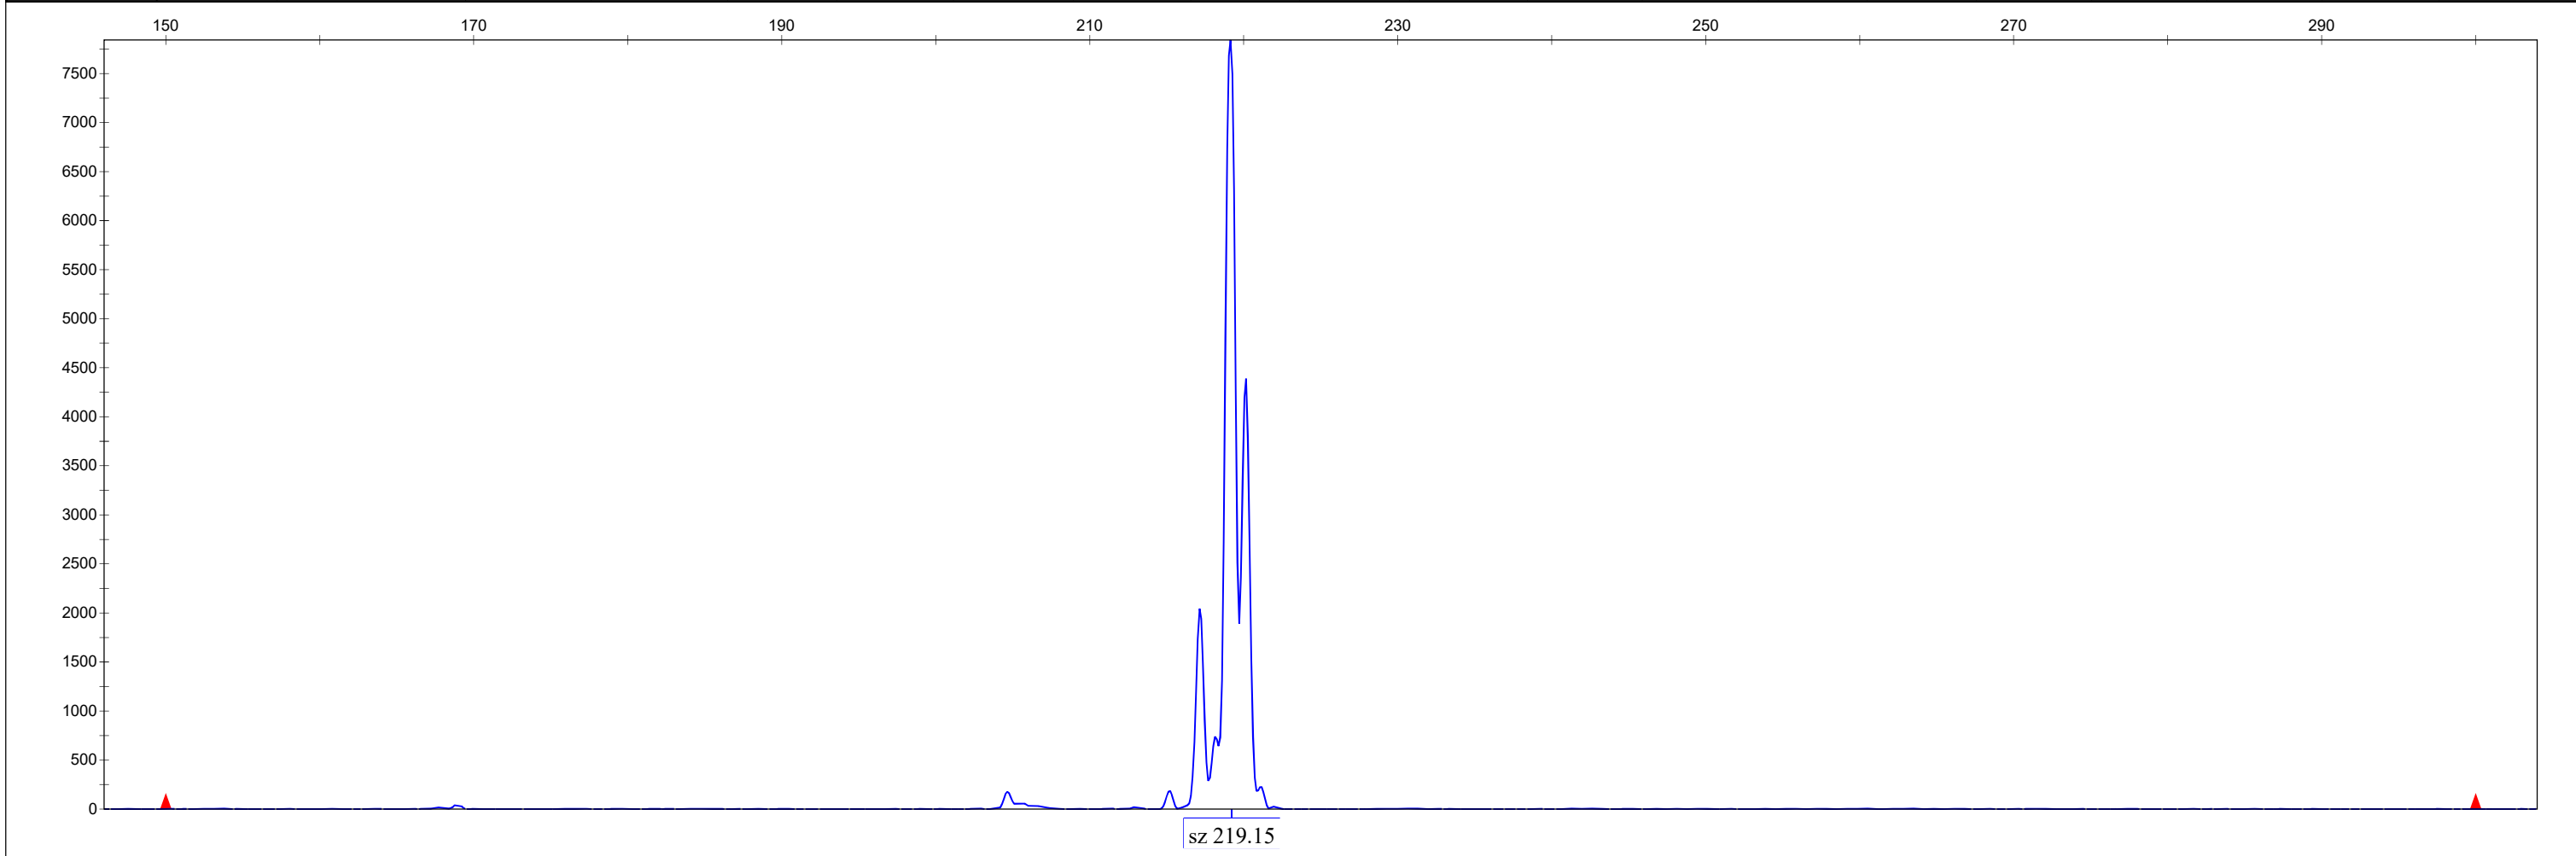

| Sample File         | Sample Name | Panel | Marker | OS | SHP | OBA | SPA | SP | BIN | PHR | LPH | SPU | AN | BD | DP | NB | CC | OVL | GQ |
|---------------------|-------------|-------|--------|----|-----|-----|-----|----|-----|-----|-----|-----|----|----|----|----|----|-----|----|
| 22 F03_011 Seq1.fsa | 22          | BC3   | BC3    |    |     |     |     |    |     |     |     |     |    |    |    |    |    |     |    |

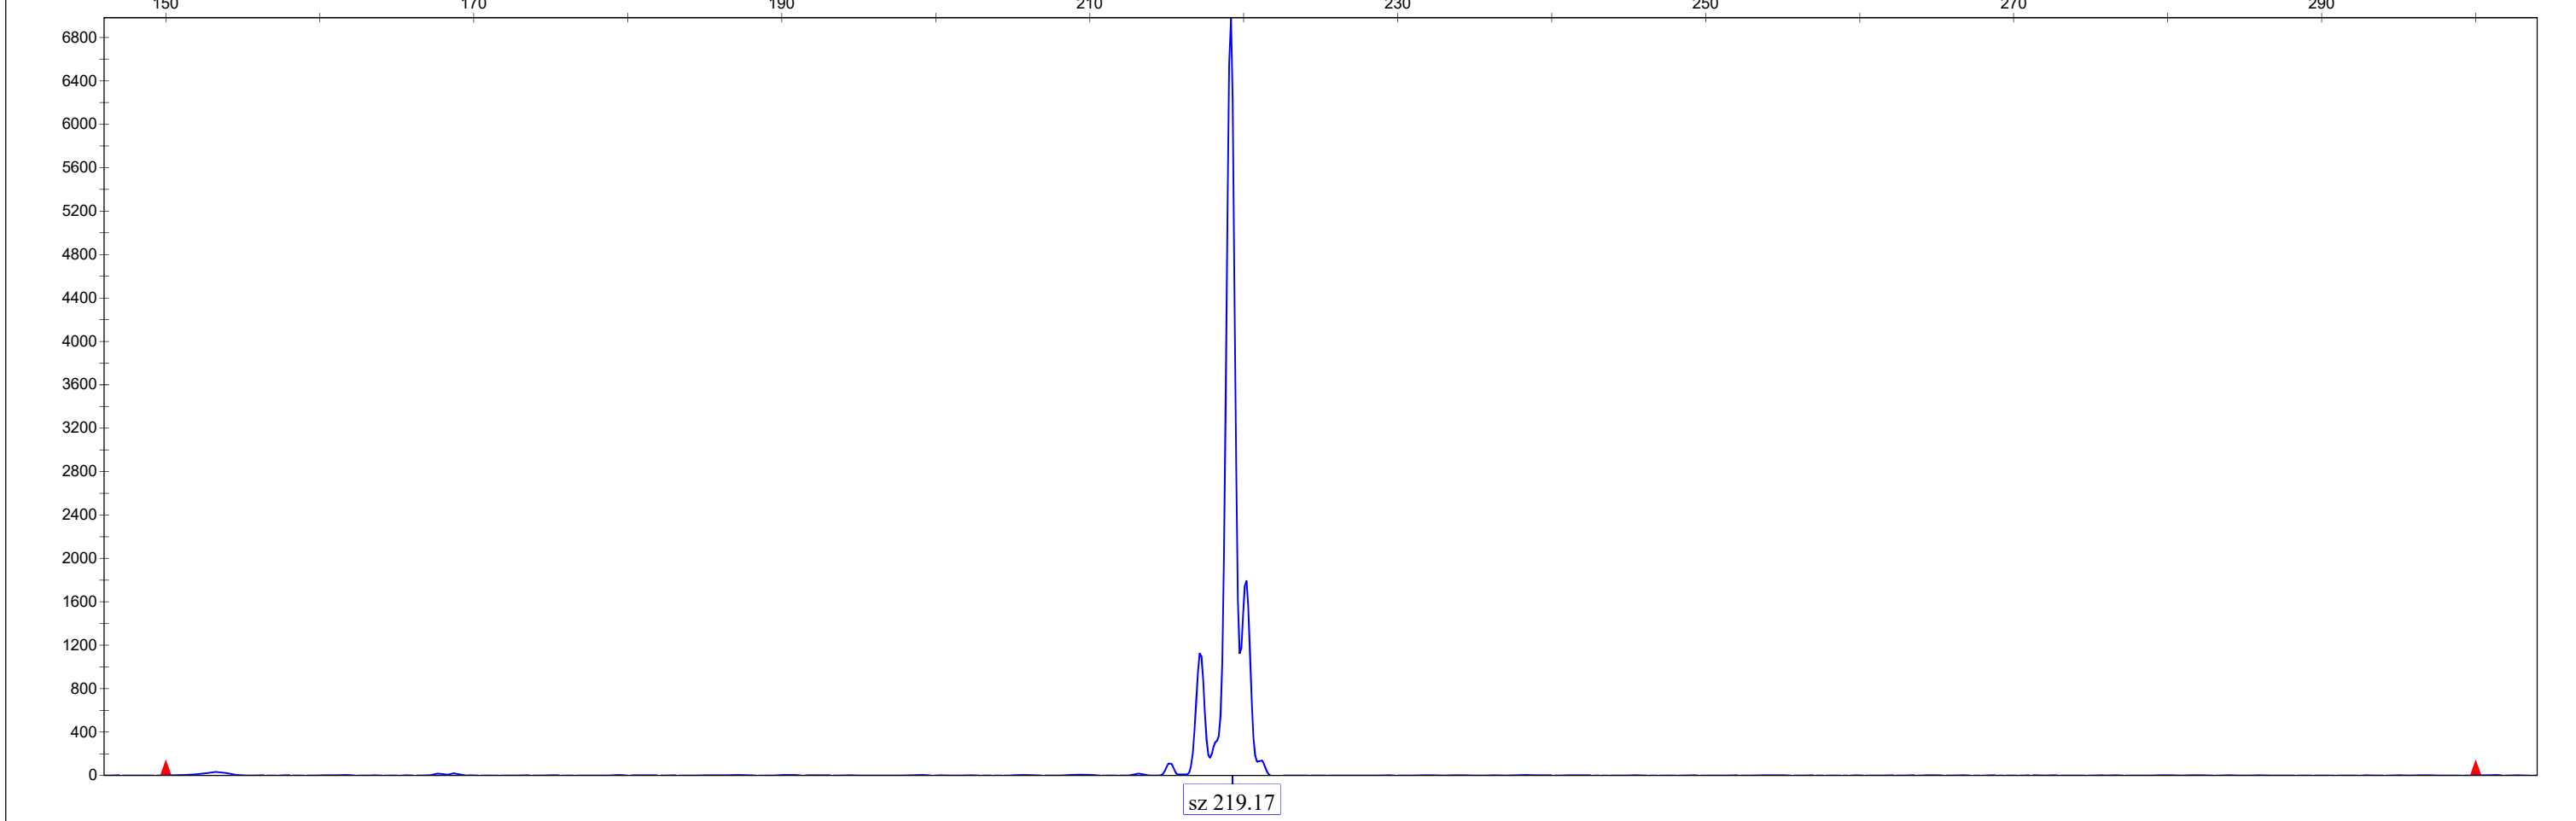

| Sample File         | Sample Name | Panel | Marker | OS | SHP | OBA | SPA | SP | BIN | PHR | LPH | SPU | AN | BD | DP | NB | CC | OVL | GQ |
|---------------------|-------------|-------|--------|----|-----|-----|-----|----|-----|-----|-----|-----|----|----|----|----|----|-----|----|
| 23 G03_013 Seq1.fsa | 23          | BC3   | BC3    |    |     |     |     |    |     |     |     |     |    |    |    |    |    |     |    |

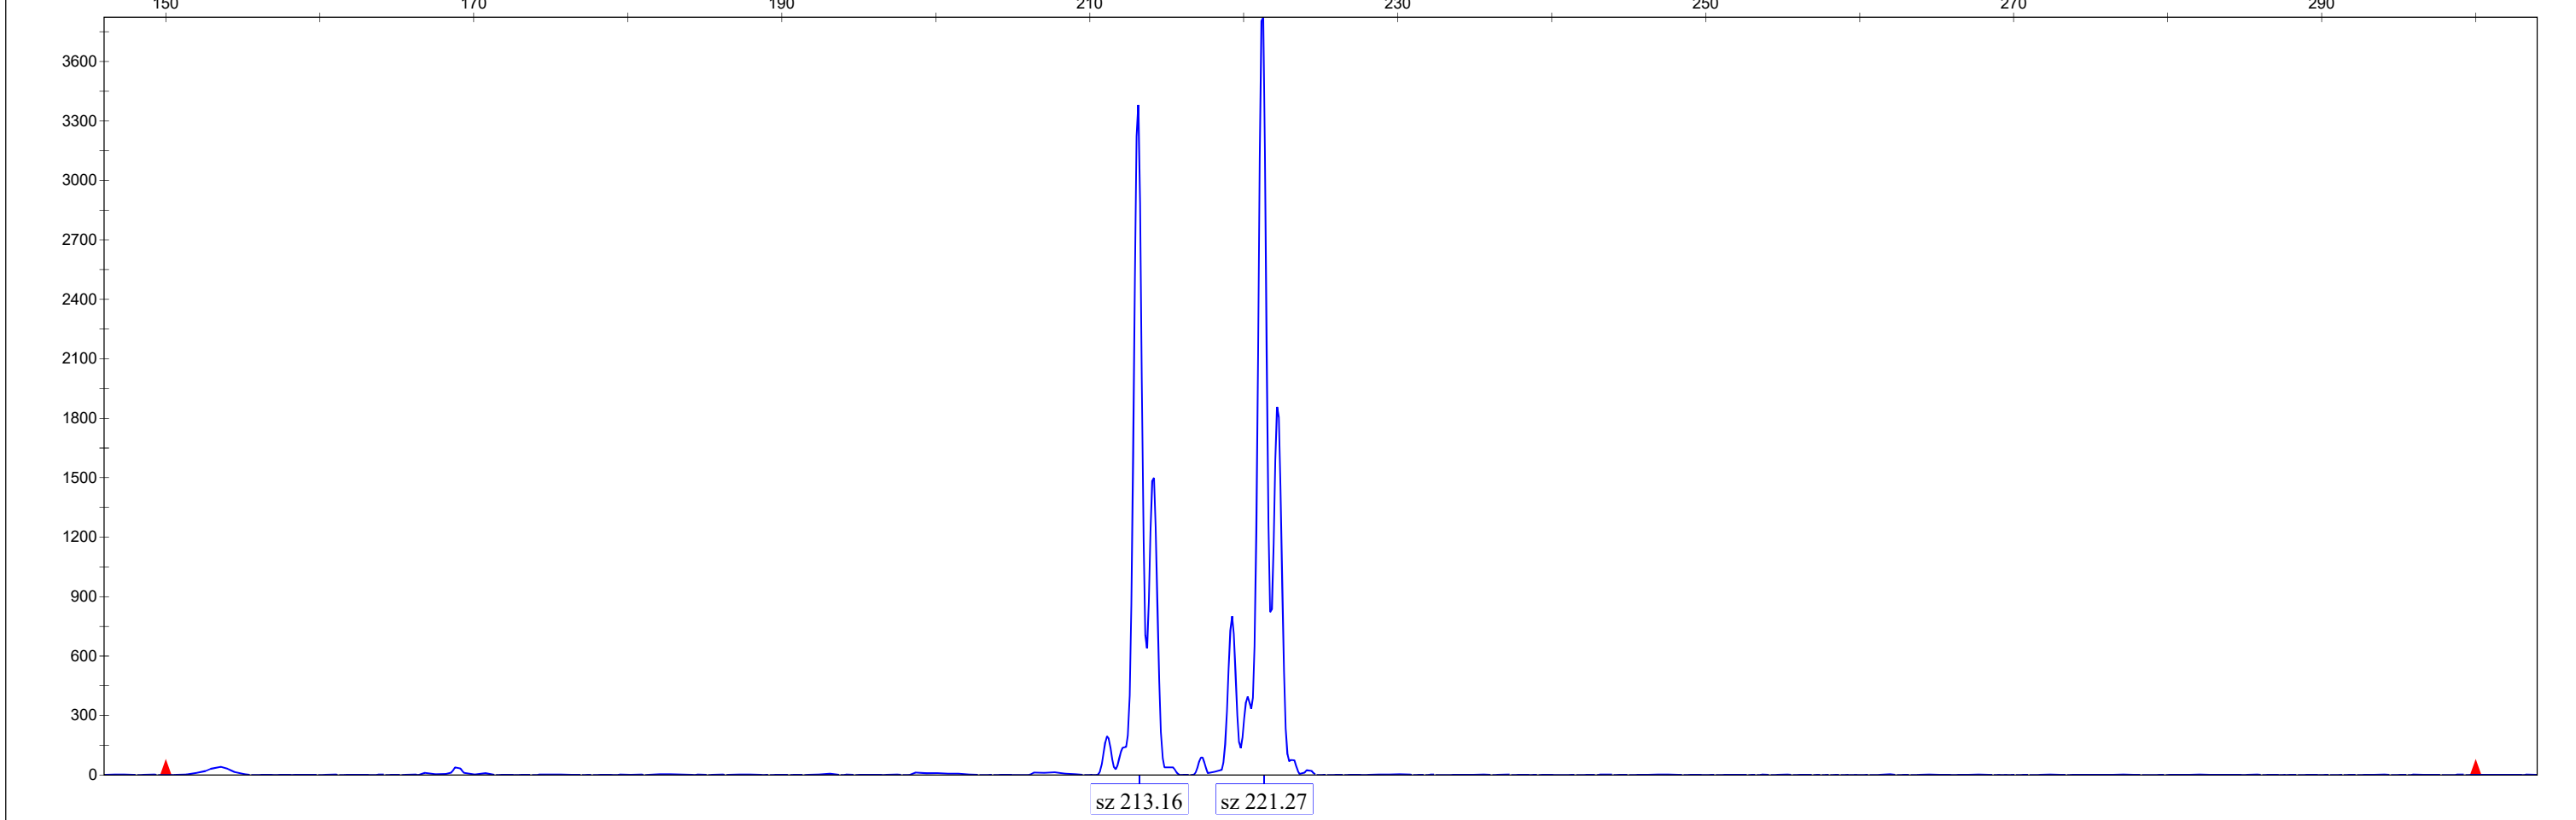

| Sample File         | Sample Name | Panel | Marker | OS | SHP | OBA | SPA | SP | BIN | PHR | LPH | SPU | AN | BD | DP | NB | CC | OVL | GQ |
|---------------------|-------------|-------|--------|----|-----|-----|-----|----|-----|-----|-----|-----|----|----|----|----|----|-----|----|
| 24 H03_015 Seq1.fsa | 24          | BC3   | BC3    |    |     |     |     |    |     |     |     |     |    |    |    |    |    |     |    |

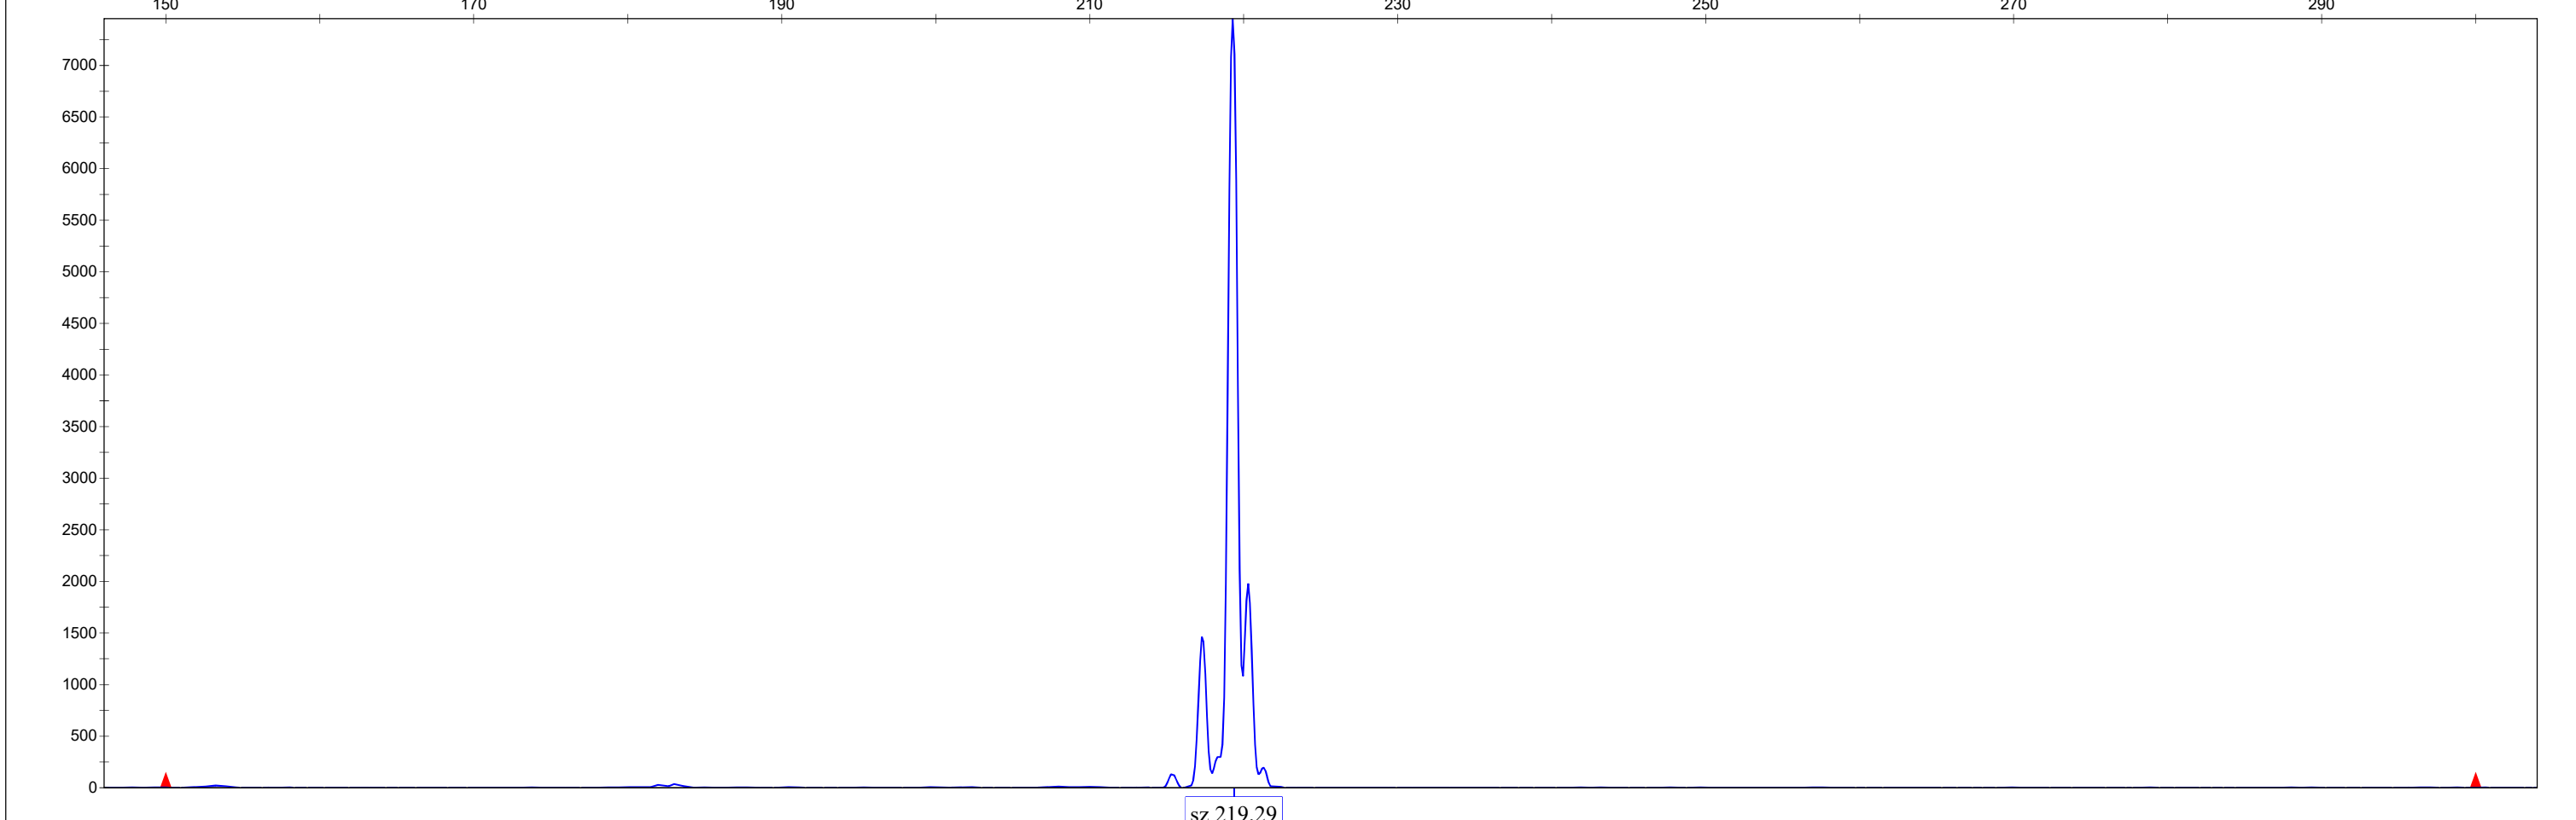

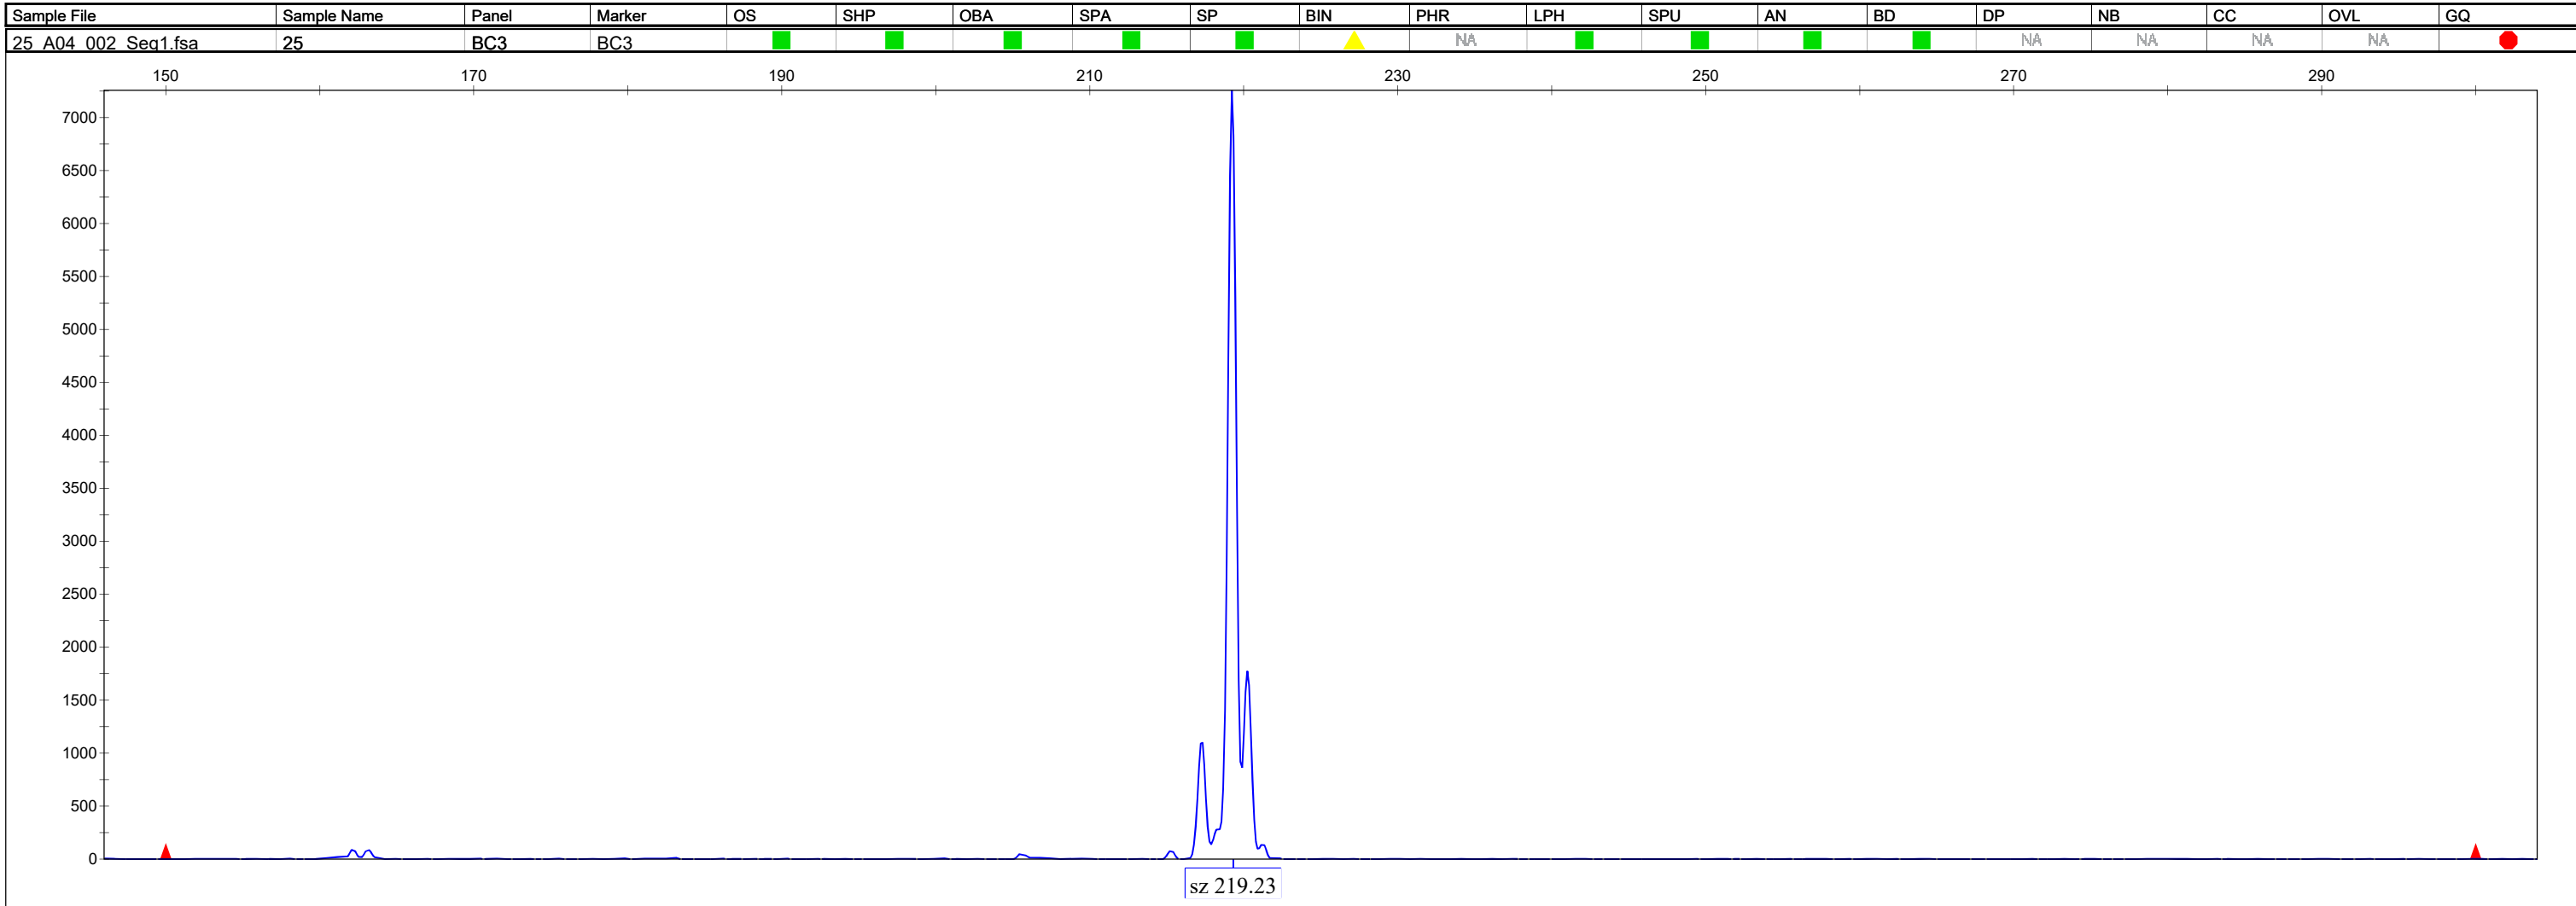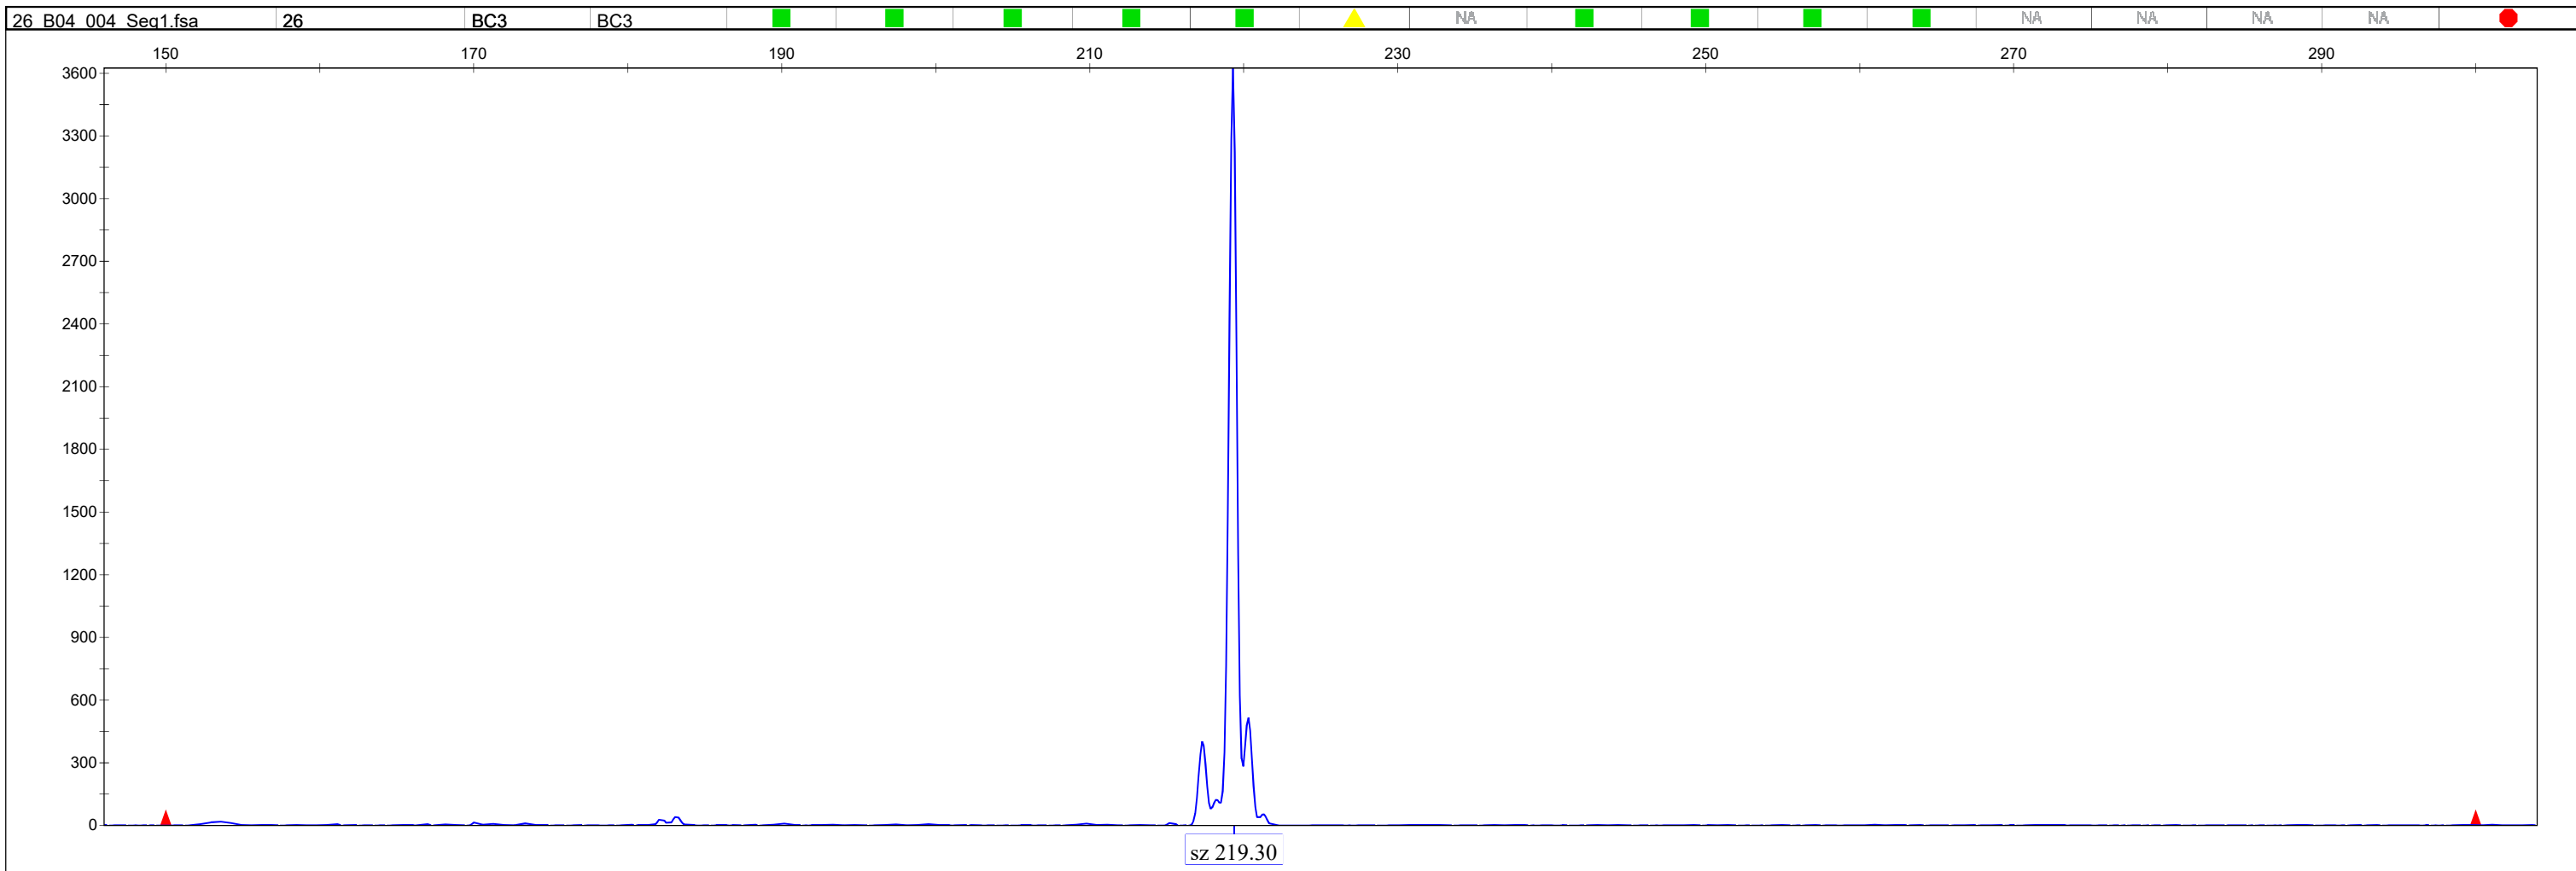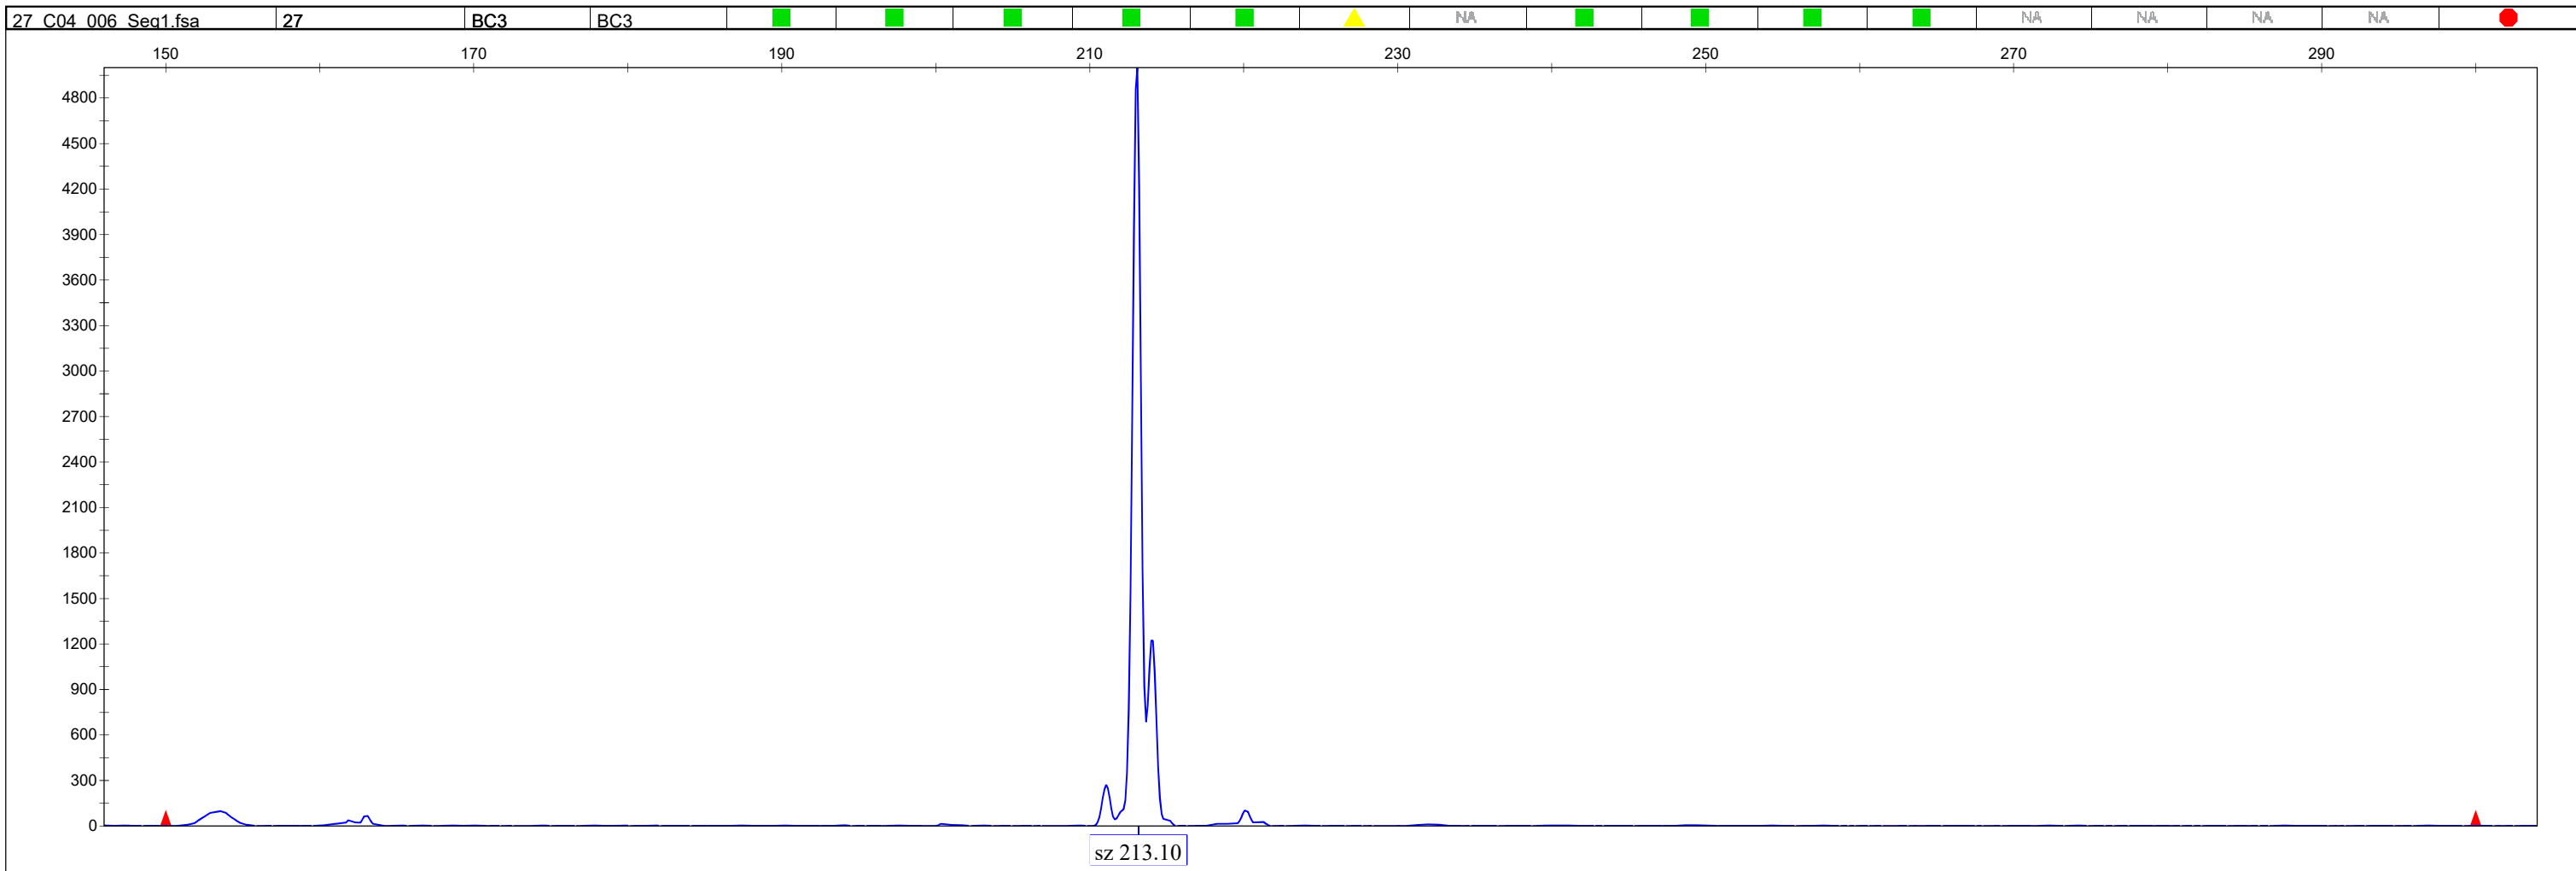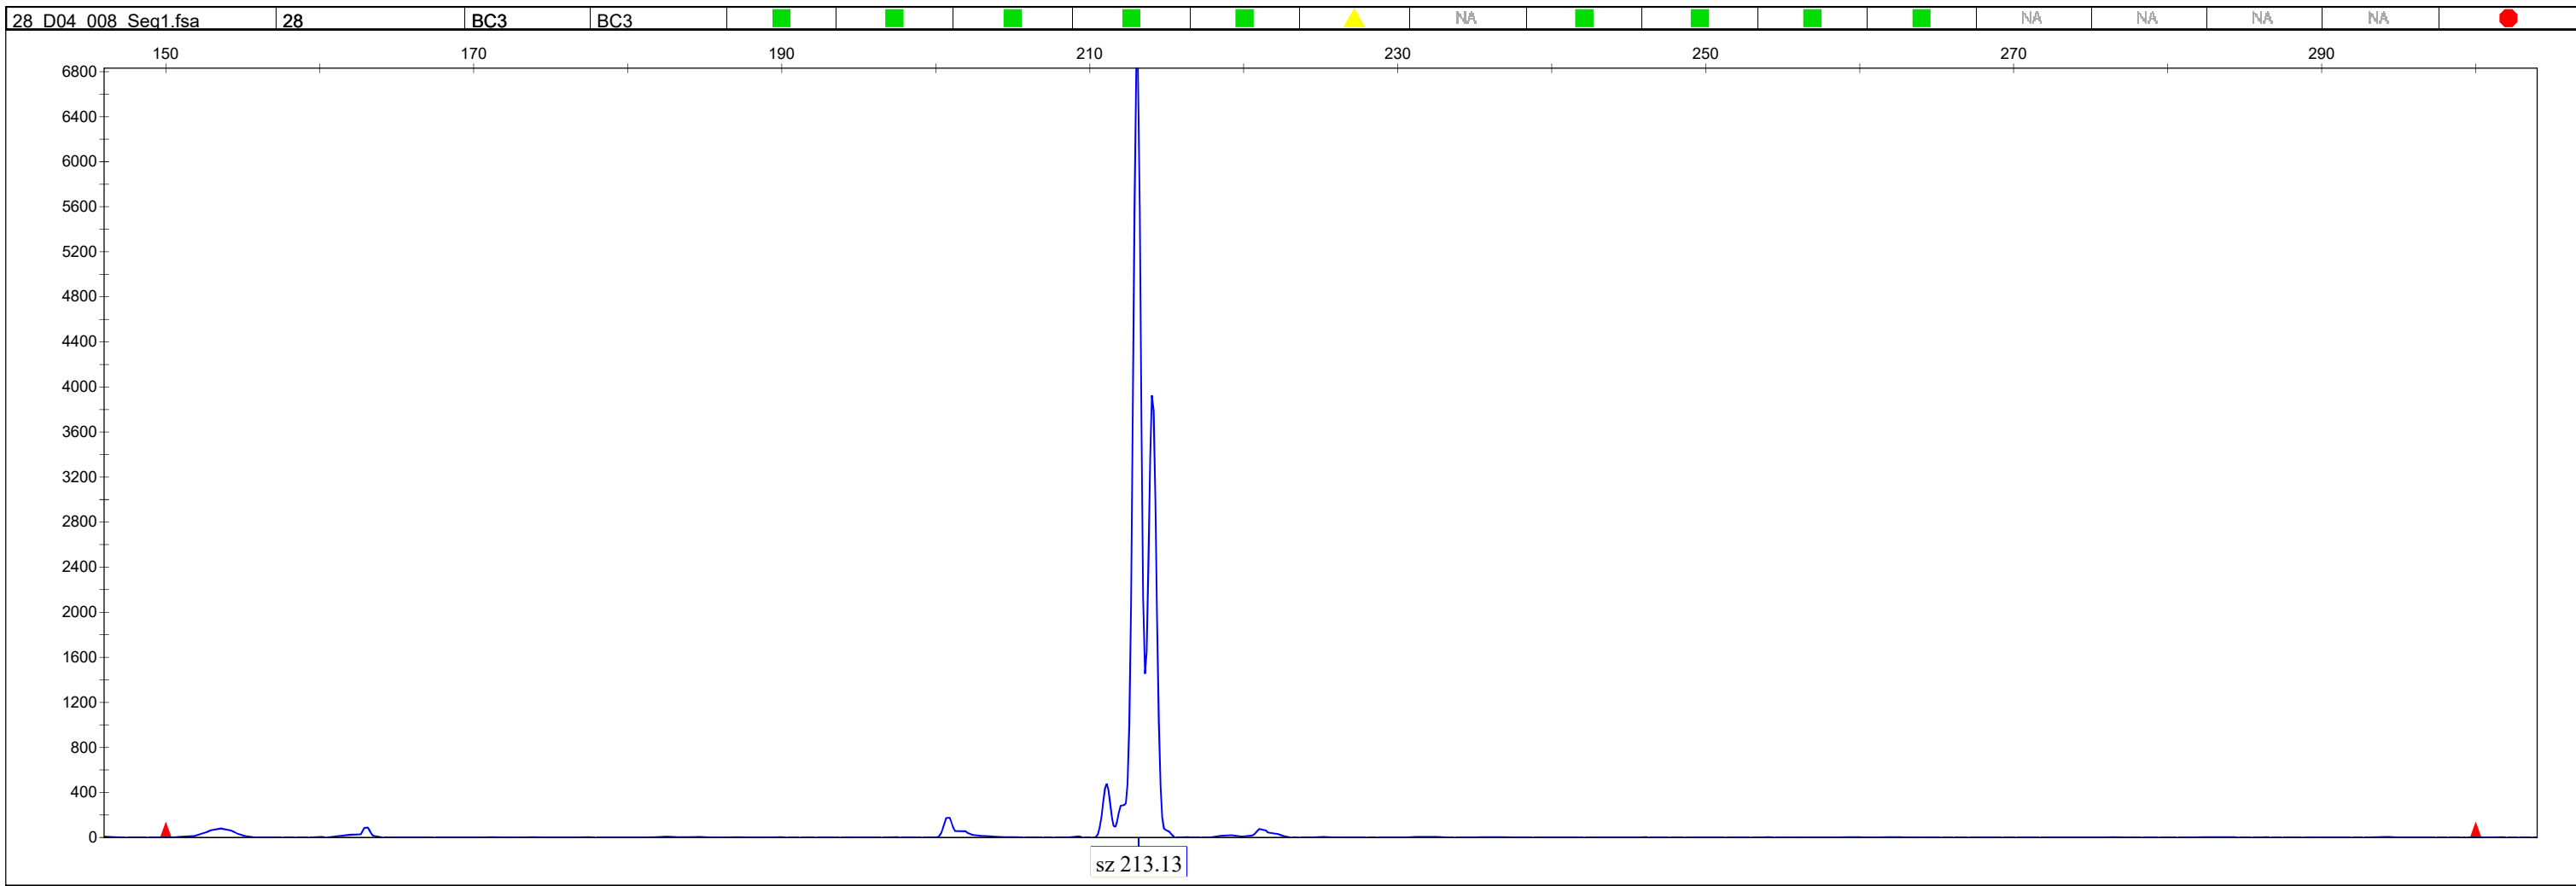

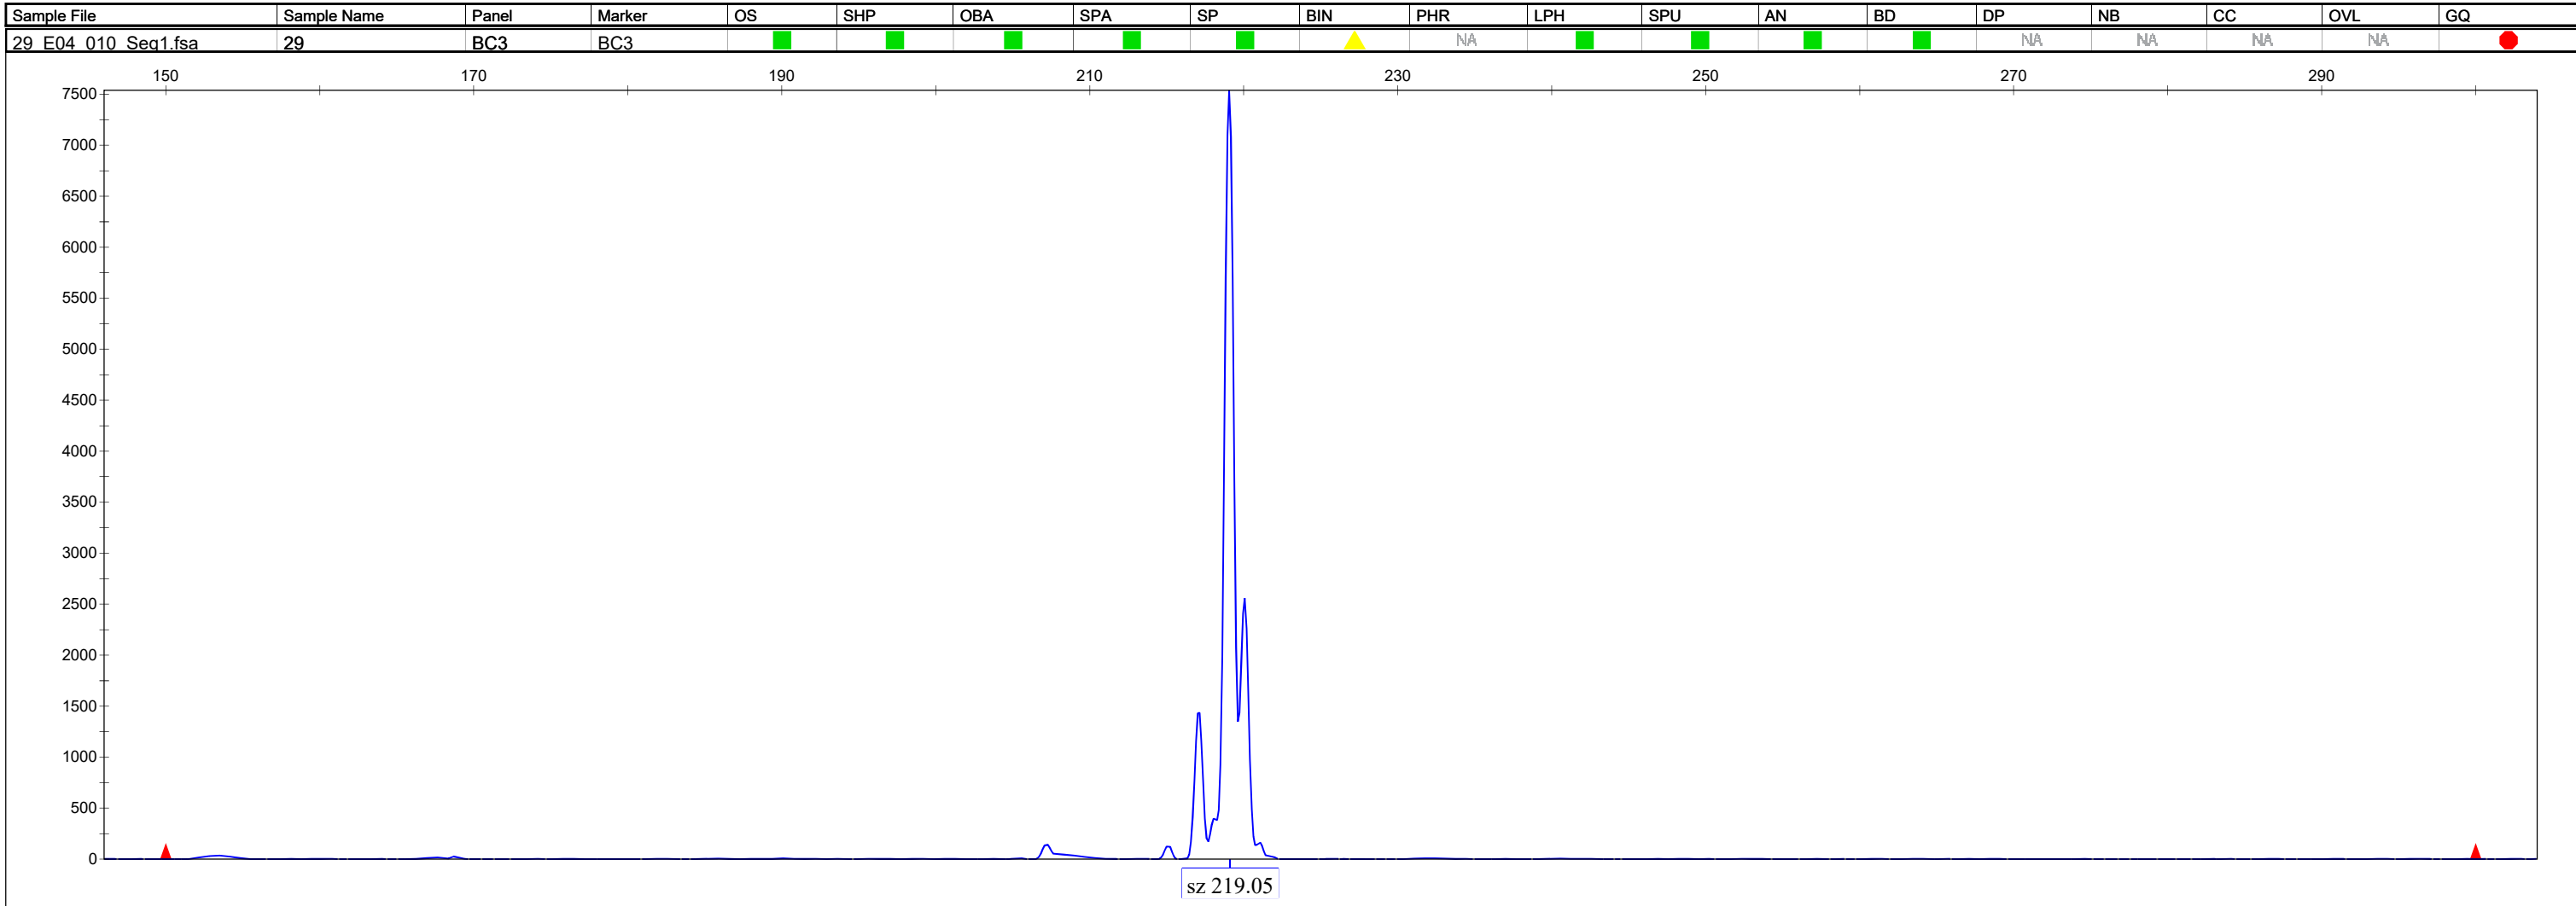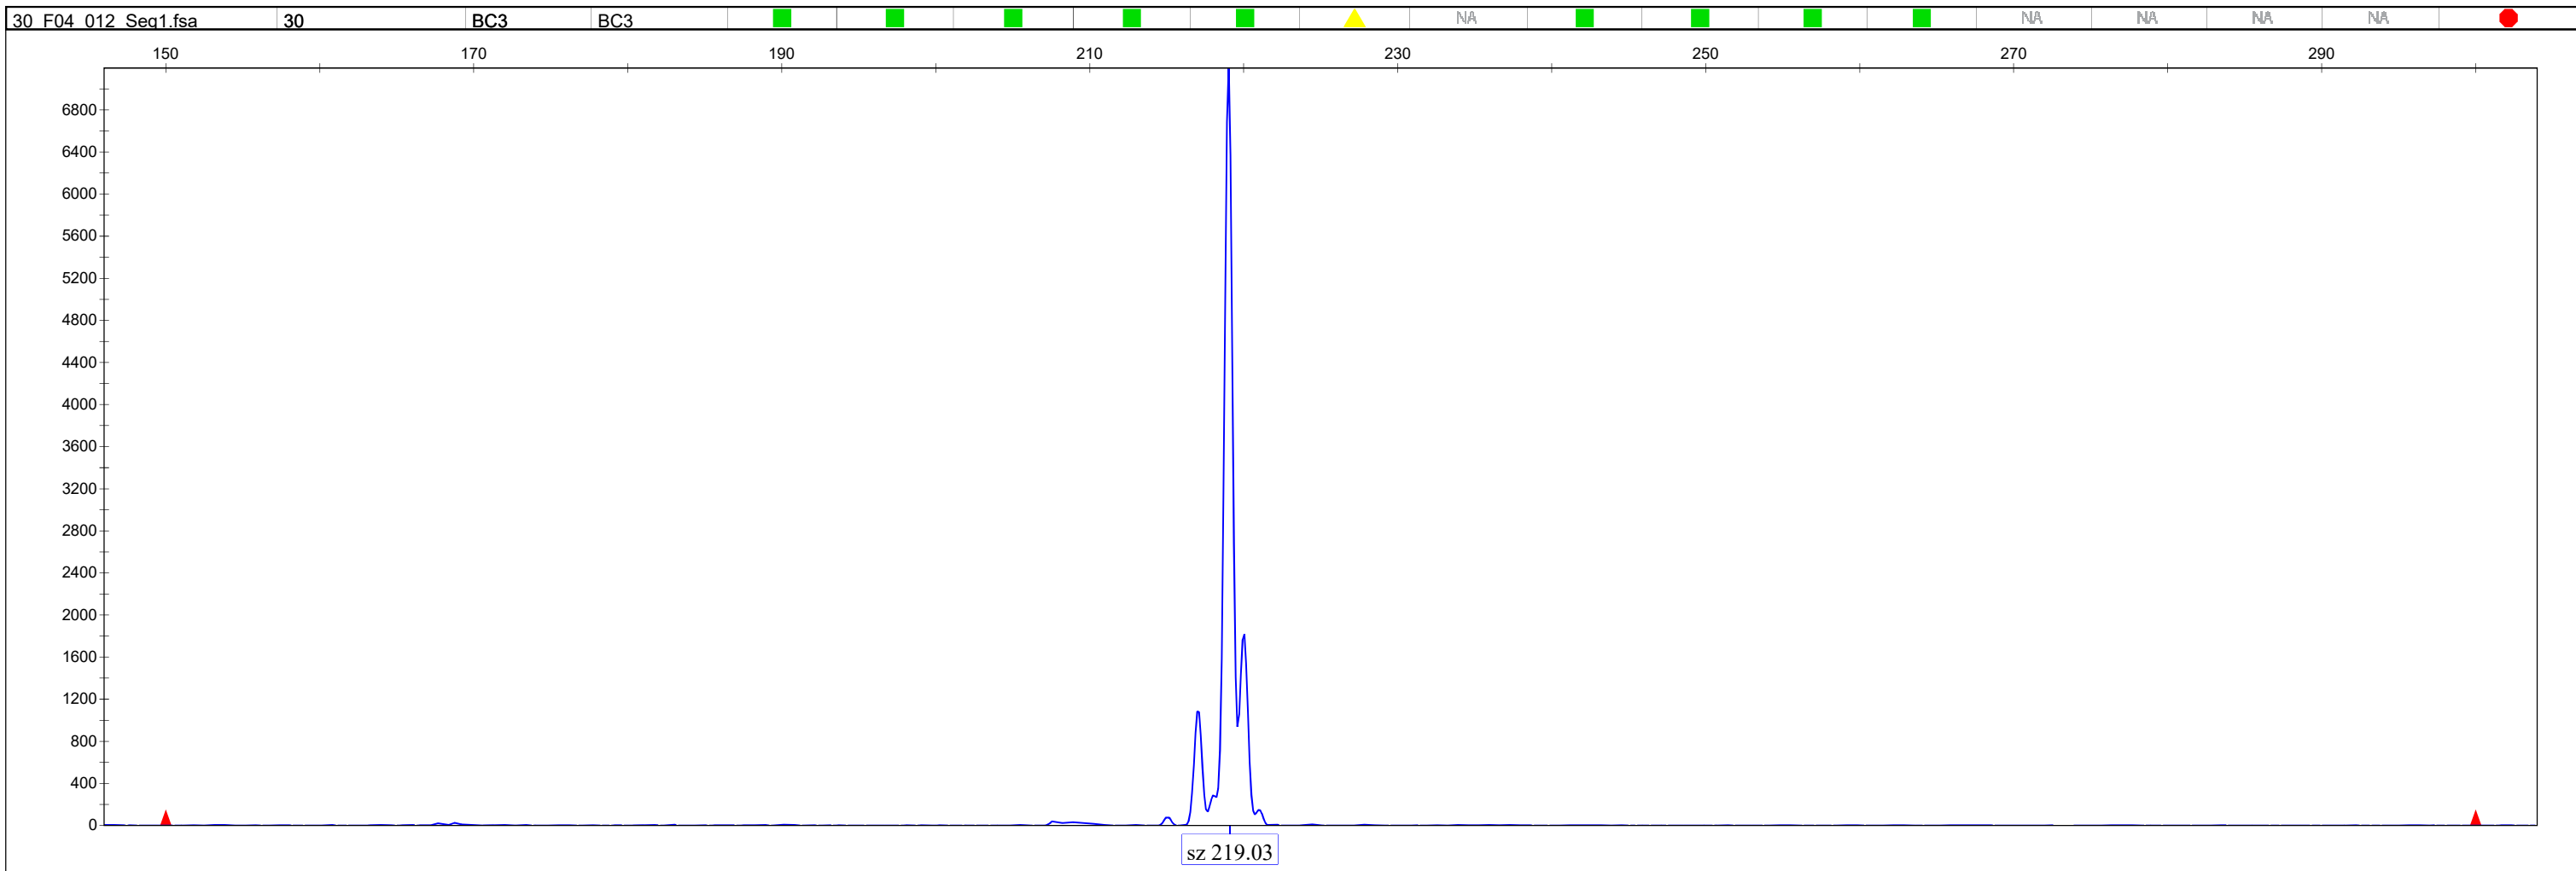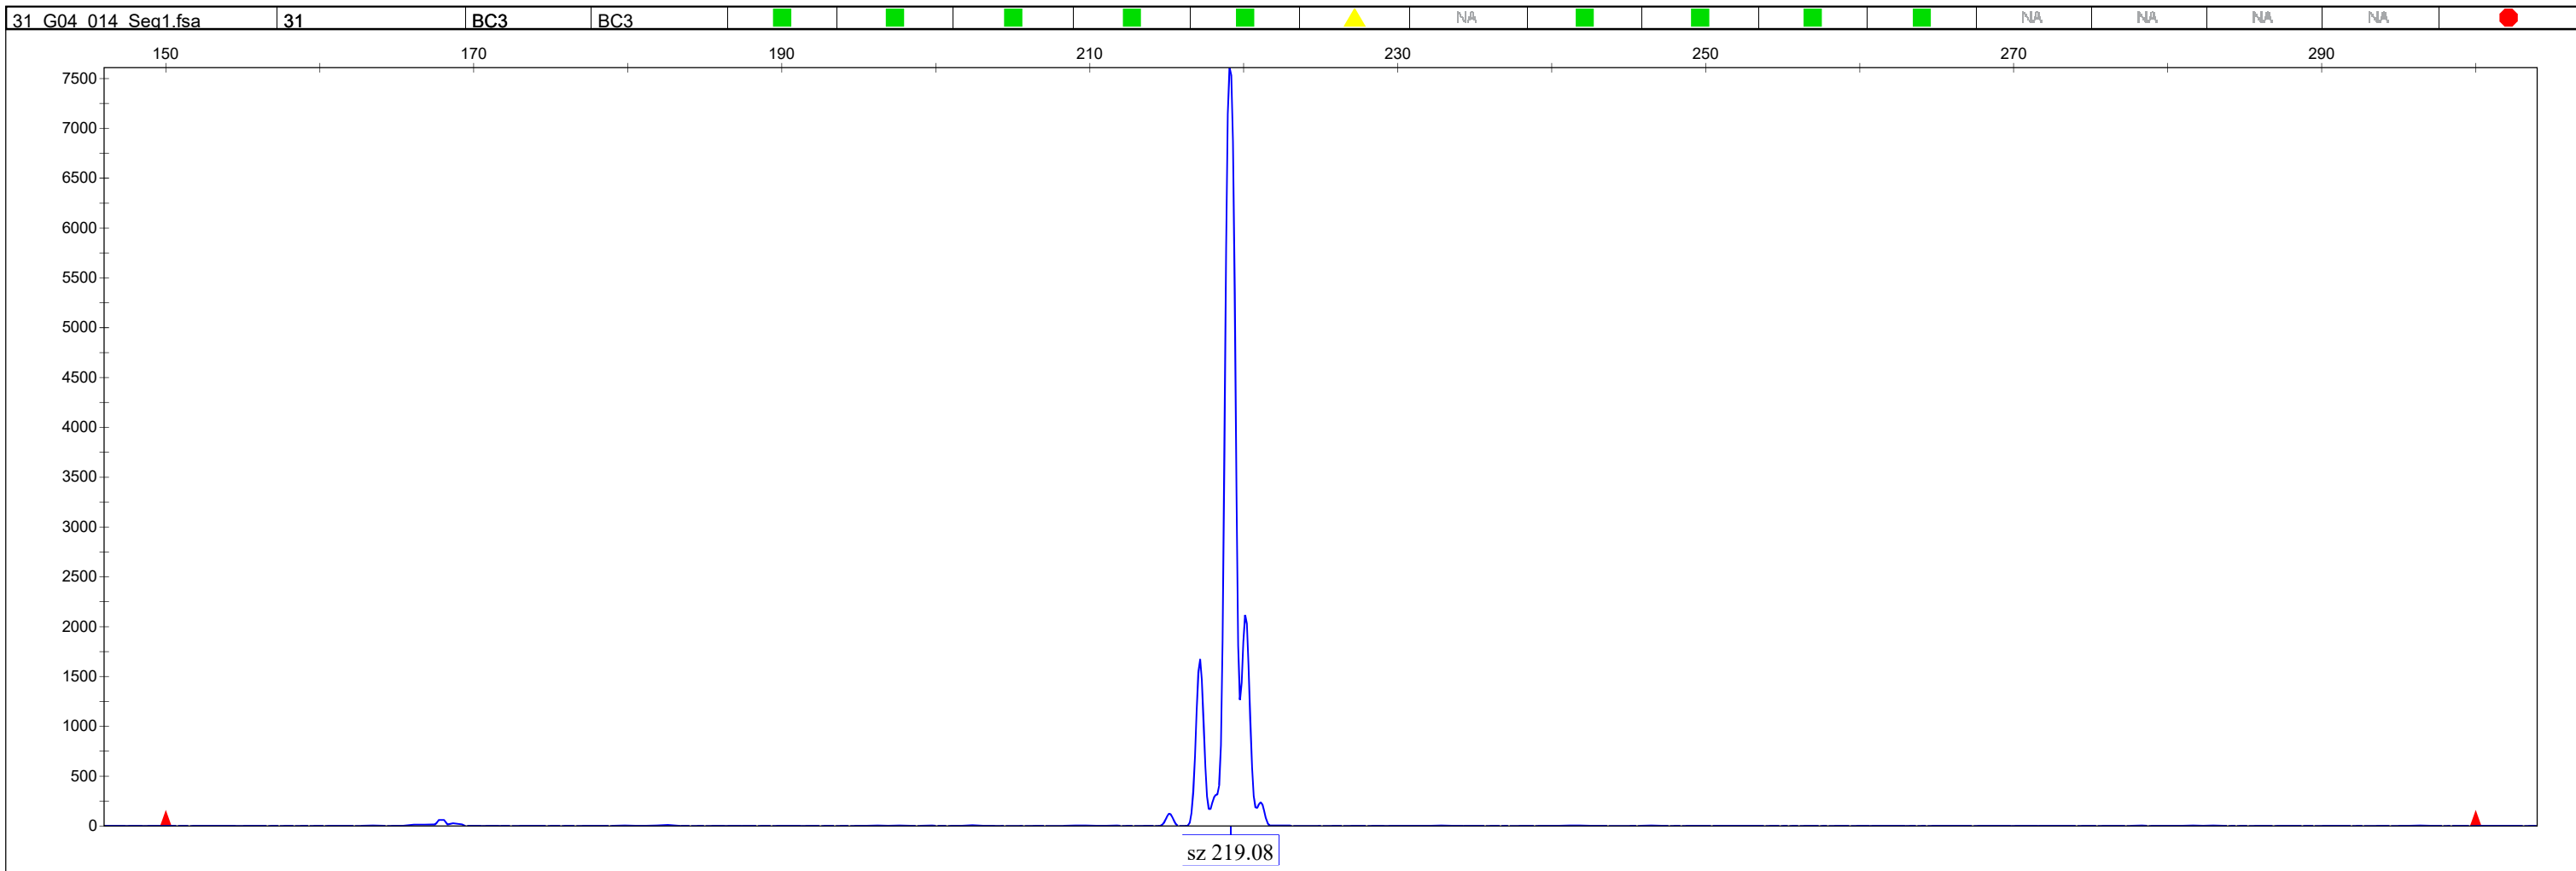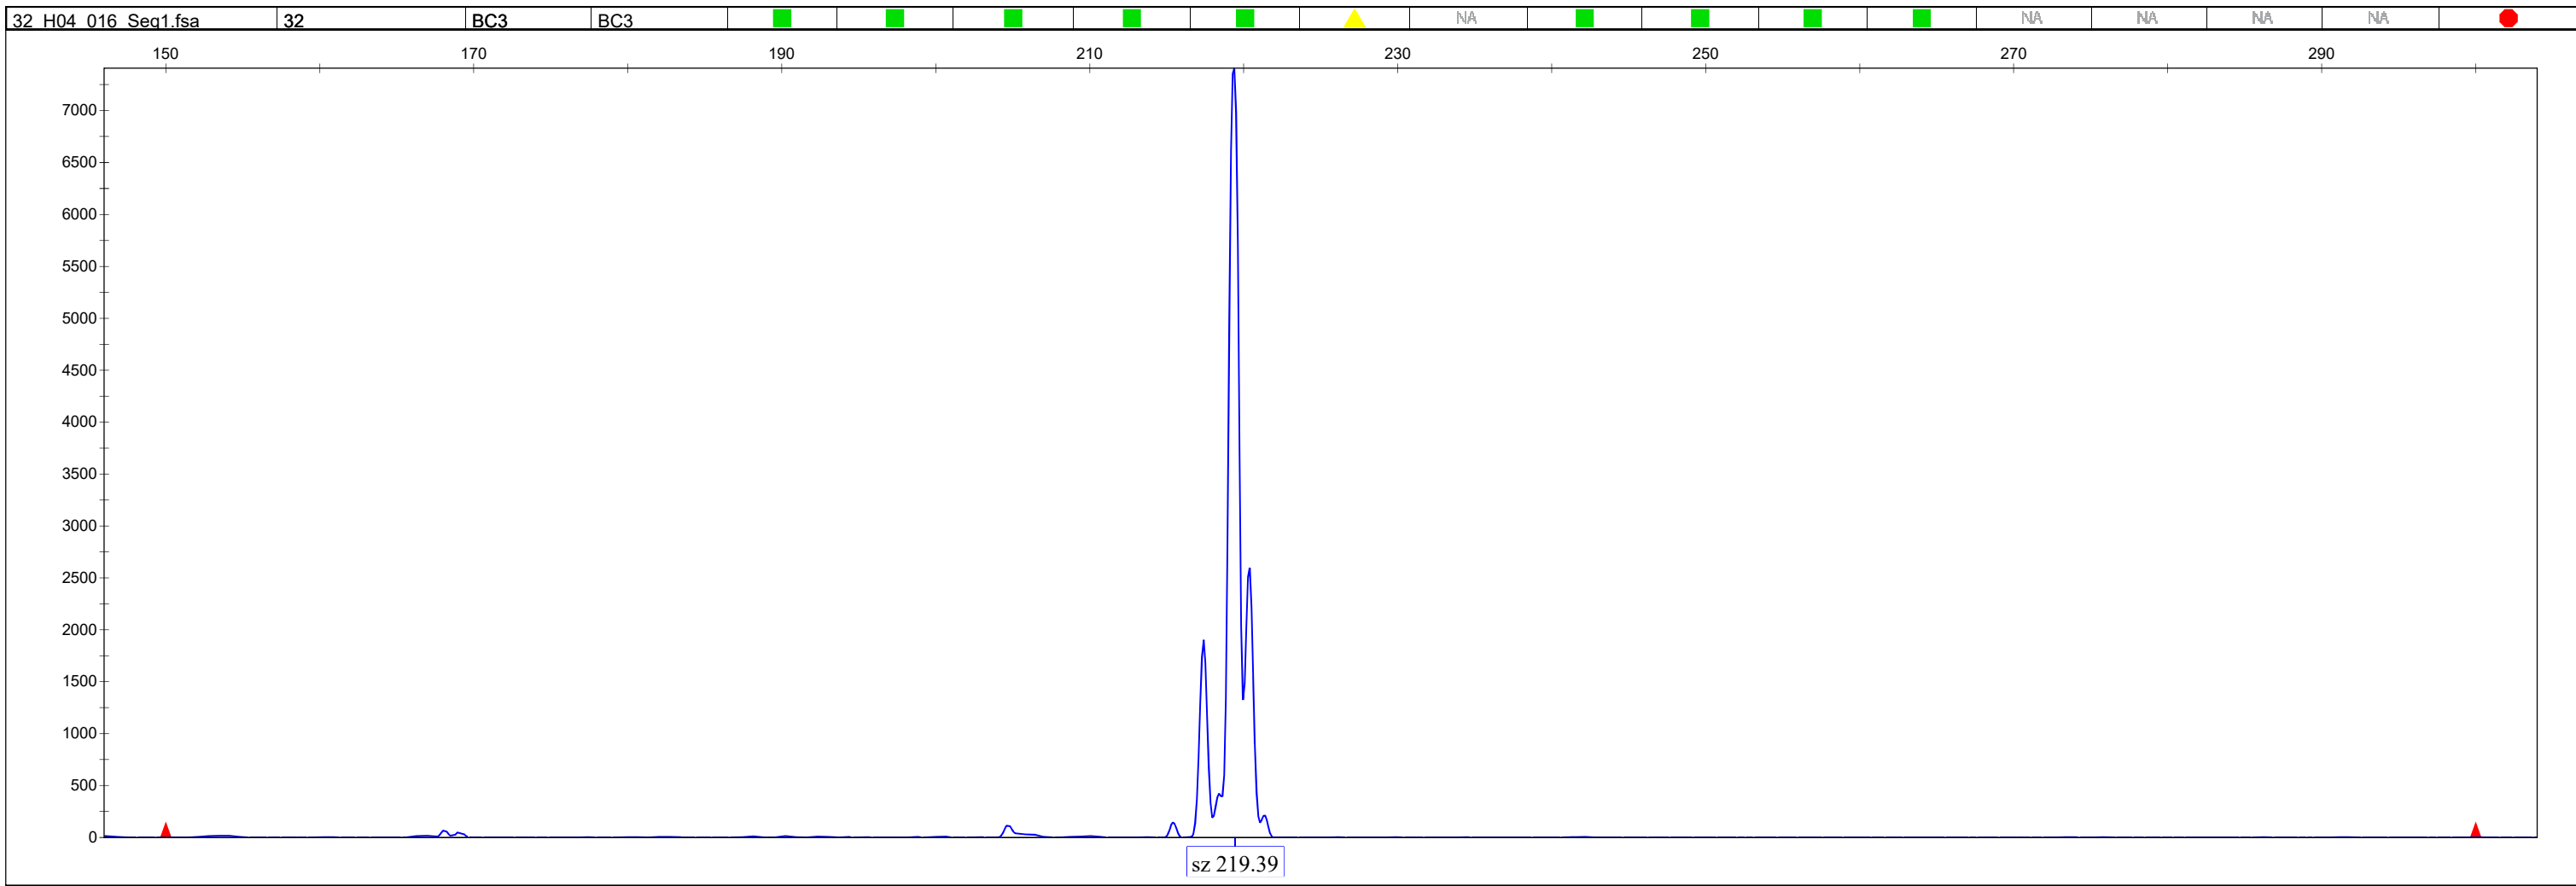



| Sample File | Sample Name | Panel | Marker | OS | SHP | OBA | SPA | SP | BIN | PHR | LPH | SPU | AN | BD | DP | NB | CC | OVL | GQ |
|-------------|-------------|-------|--------|----|-----|-----|-----|----|-----|-----|-----|-----|----|----|----|----|----|-----|----|
|-------------|-------------|-------|--------|----|-----|-----|-----|----|-----|-----|-----|-----|----|----|----|----|----|-----|----|

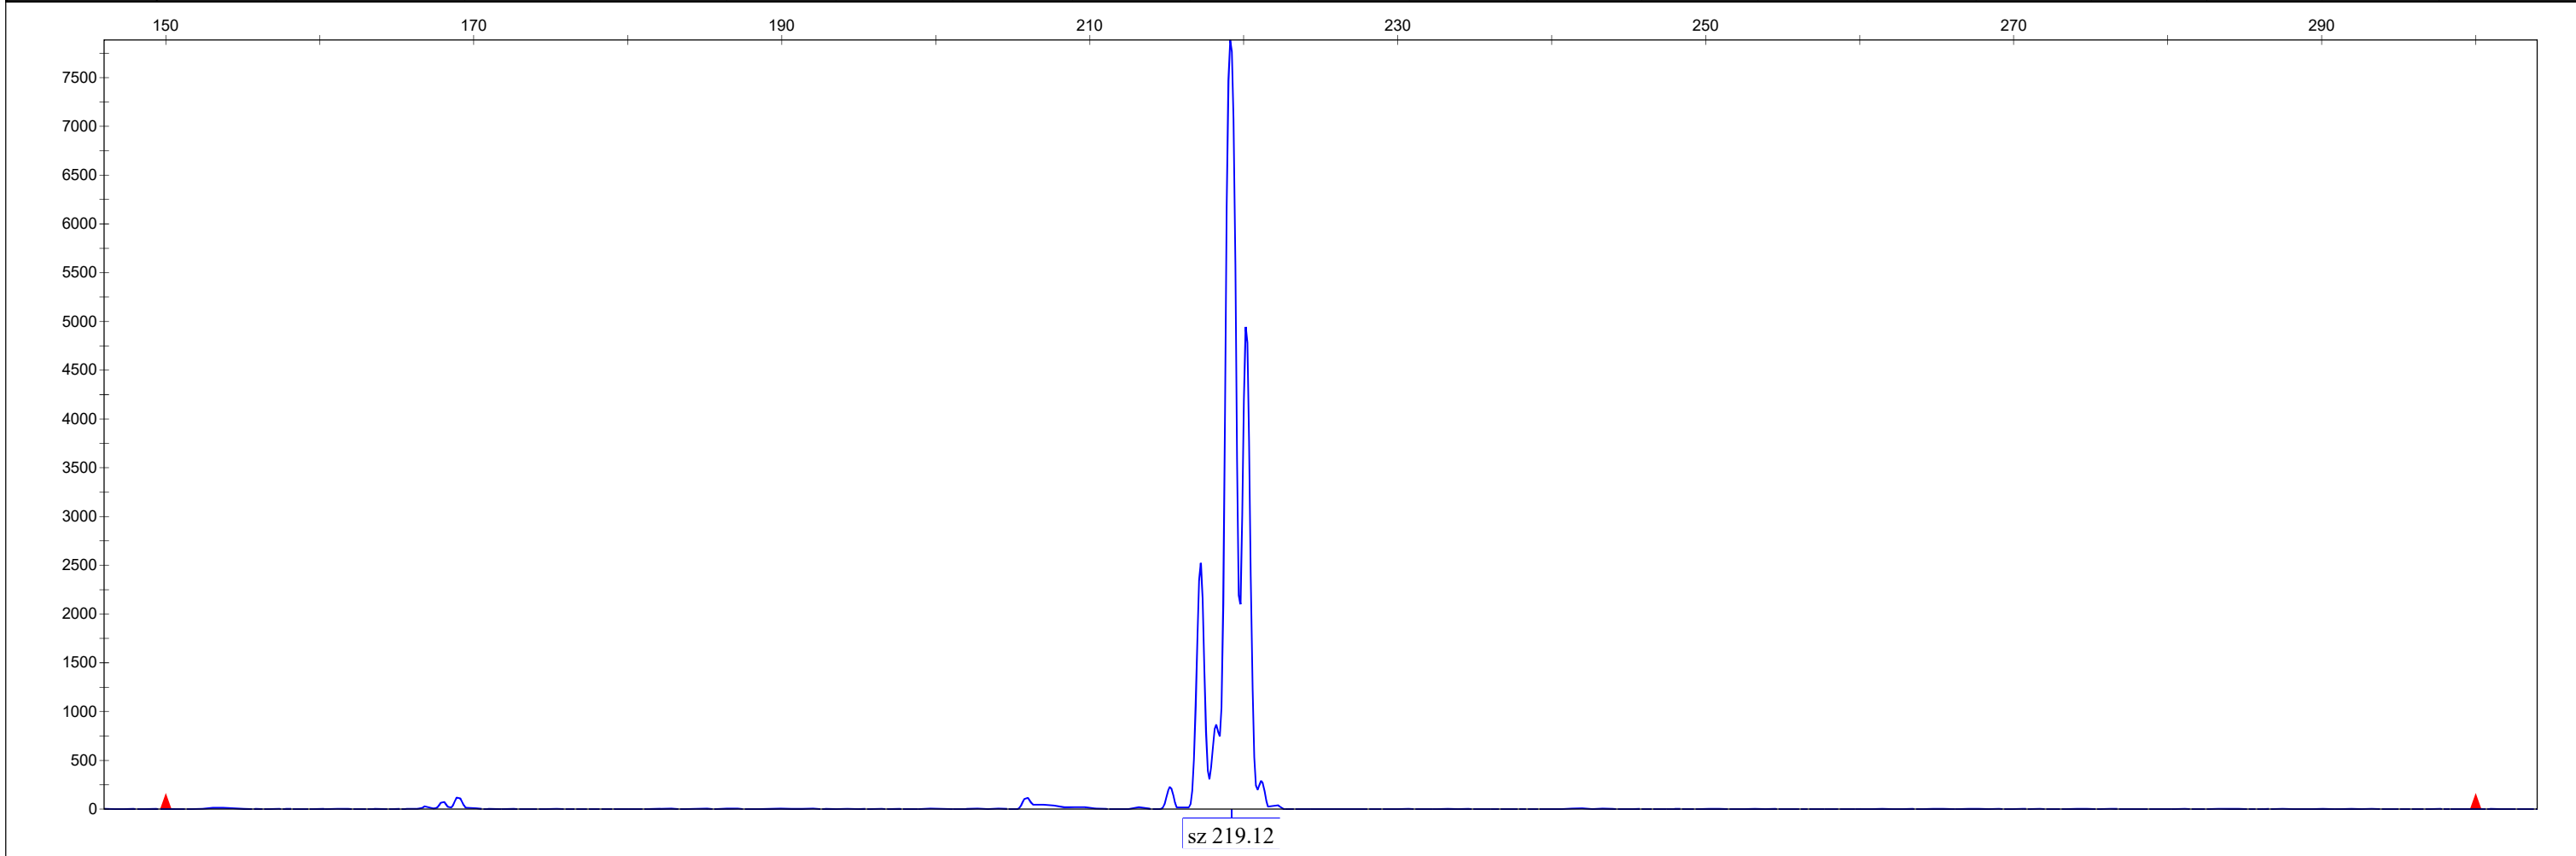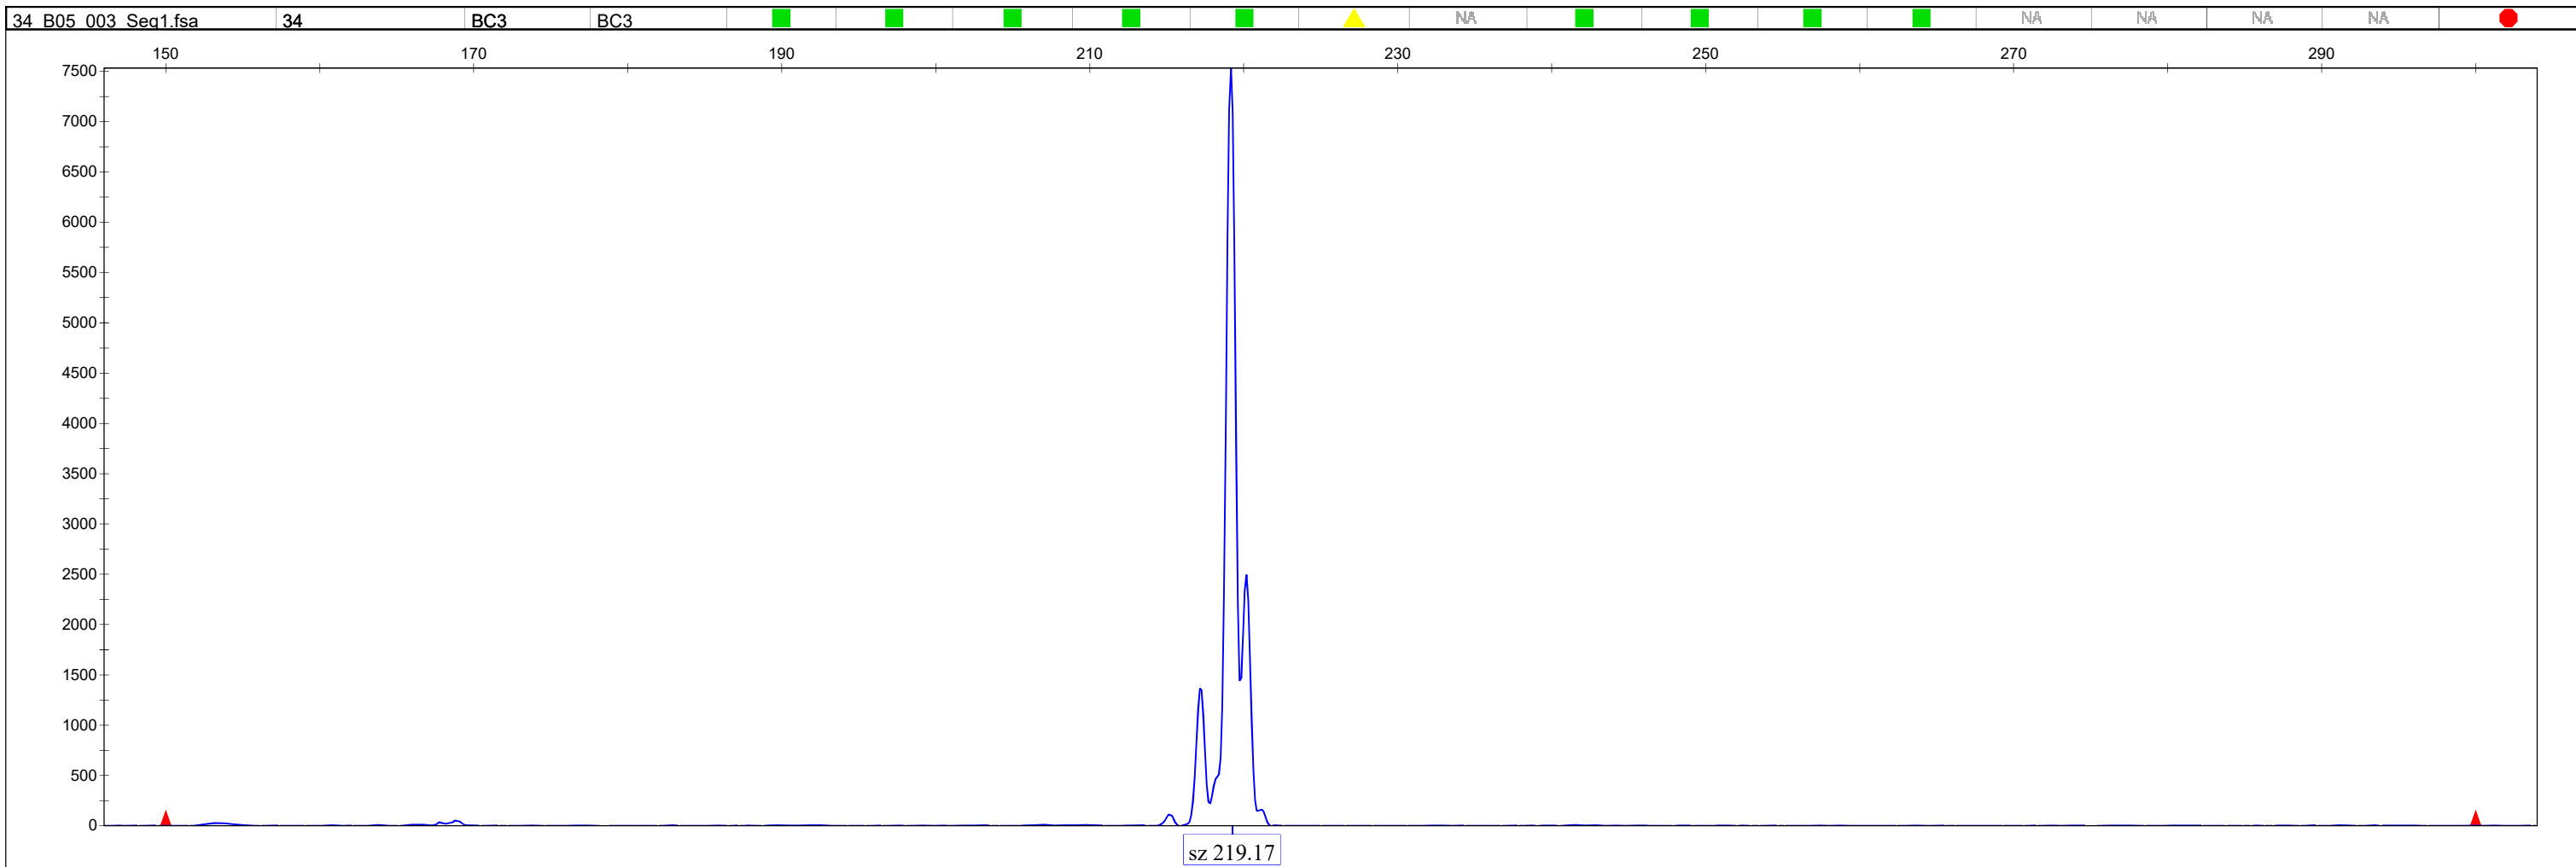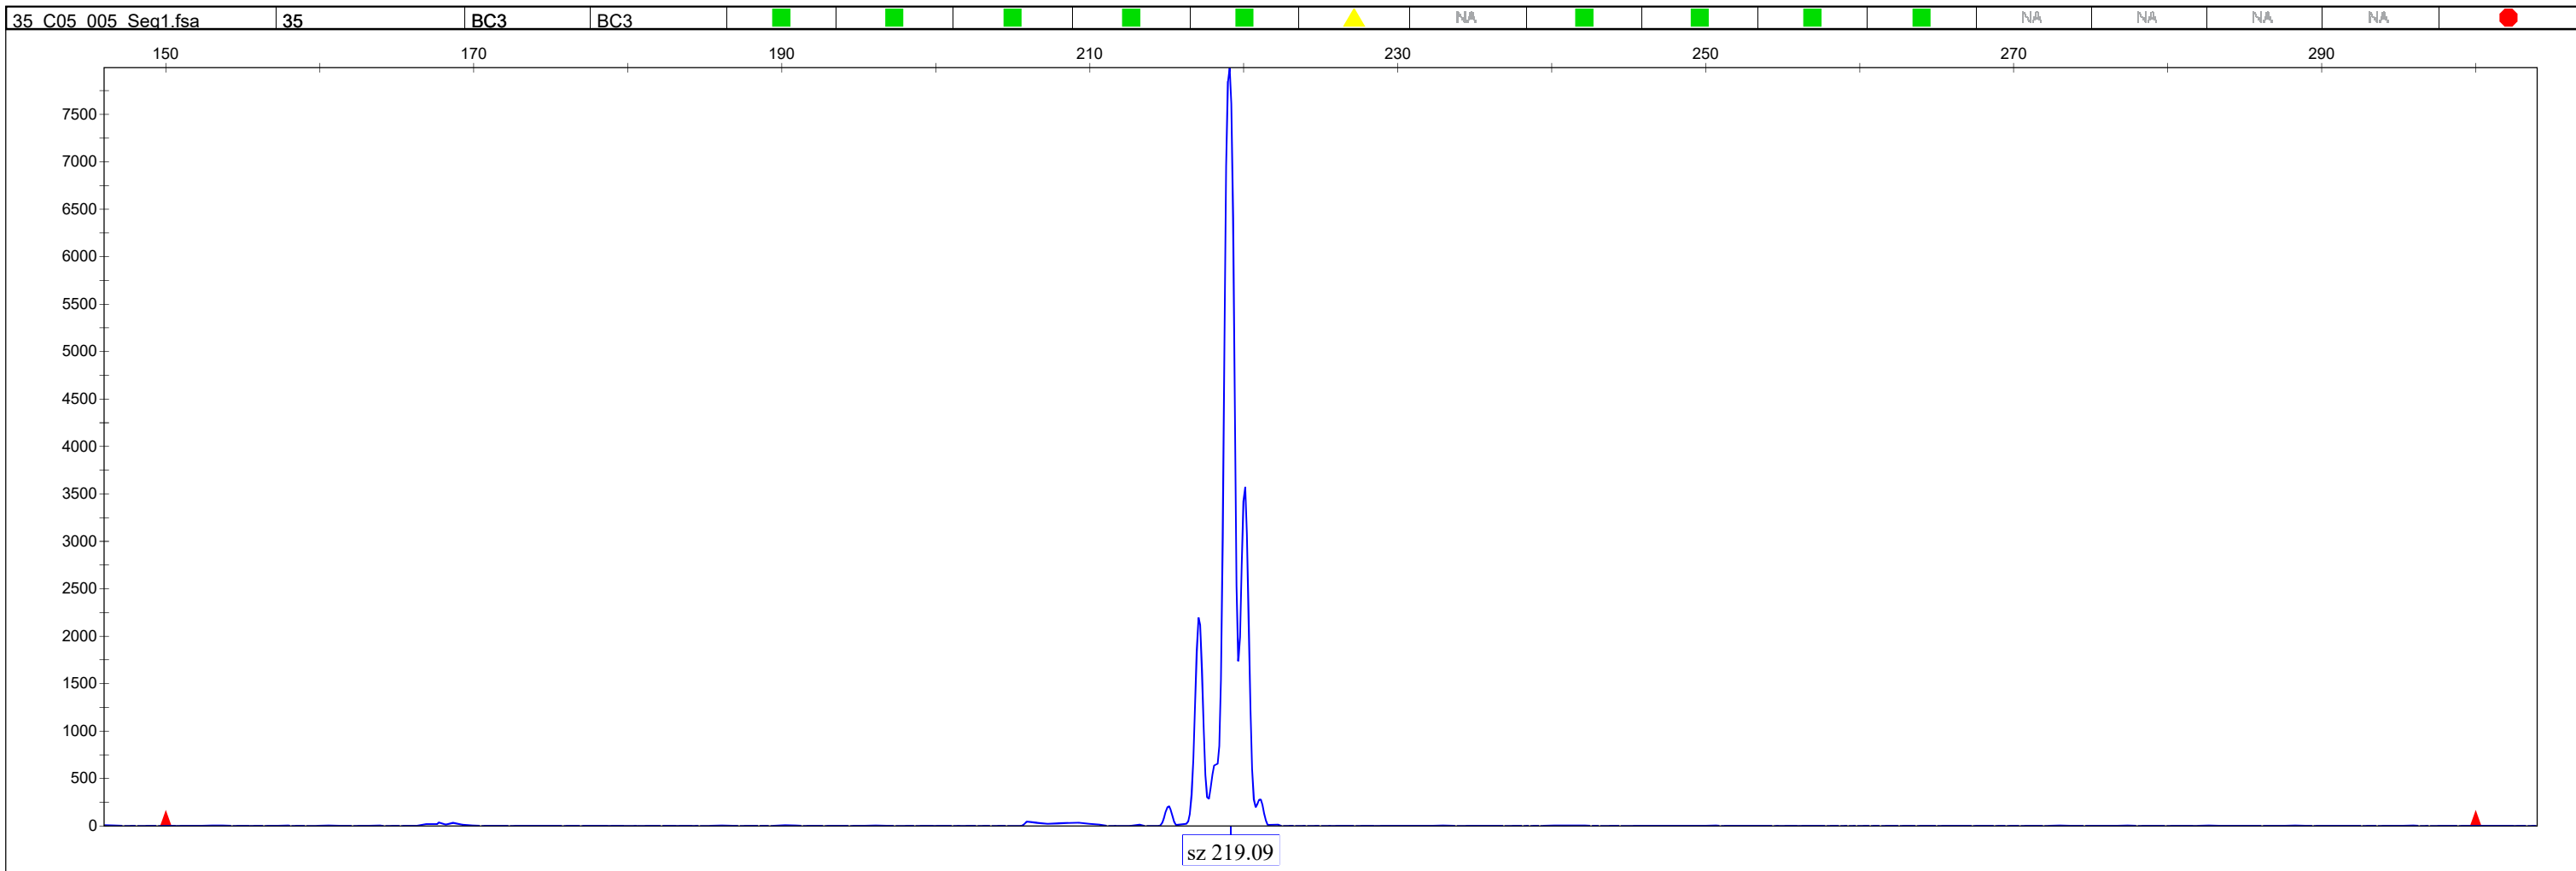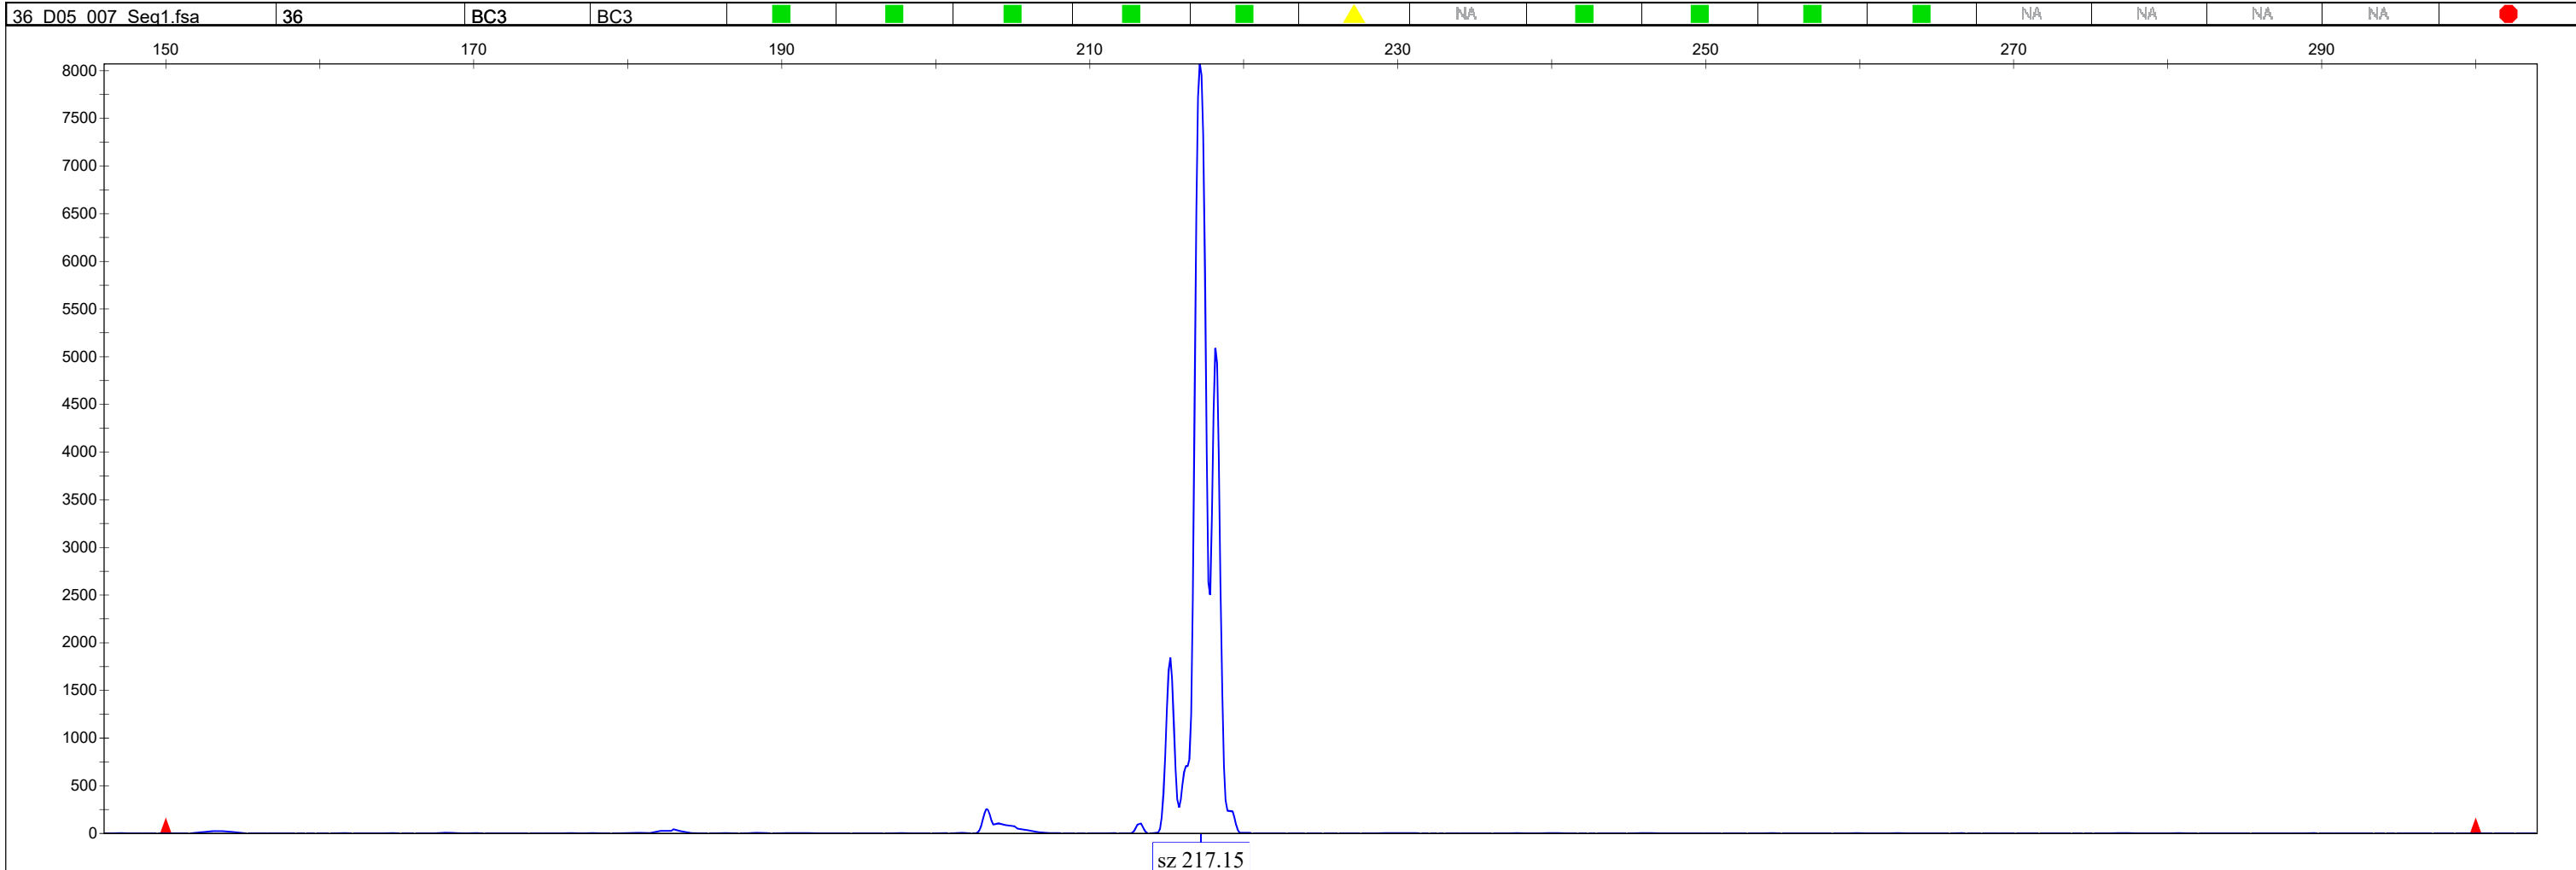

| Sample File         | Sample Name | Panel | Marker | OS   | SHP  | OBA | SPA  | SP   | BIN | PHR  | LPH  | SPU  | AN   | BD   | DP | NB  | CC  | OVL | GQ |   |
|---------------------|-------------|-------|--------|------|------|-----|------|------|-----|------|------|------|------|------|----|-----|-----|-----|----|---|
| 37_E05_009_Seq1.fsa | 37          | BC3   | BC3    | -4.0 | -4.0 | ▲   | -4.0 | -4.0 | ▲   | -4.0 | -4.0 | -4.0 | -4.0 | -4.0 |    | N/A | N/A | N/A | ▲  | ■ |

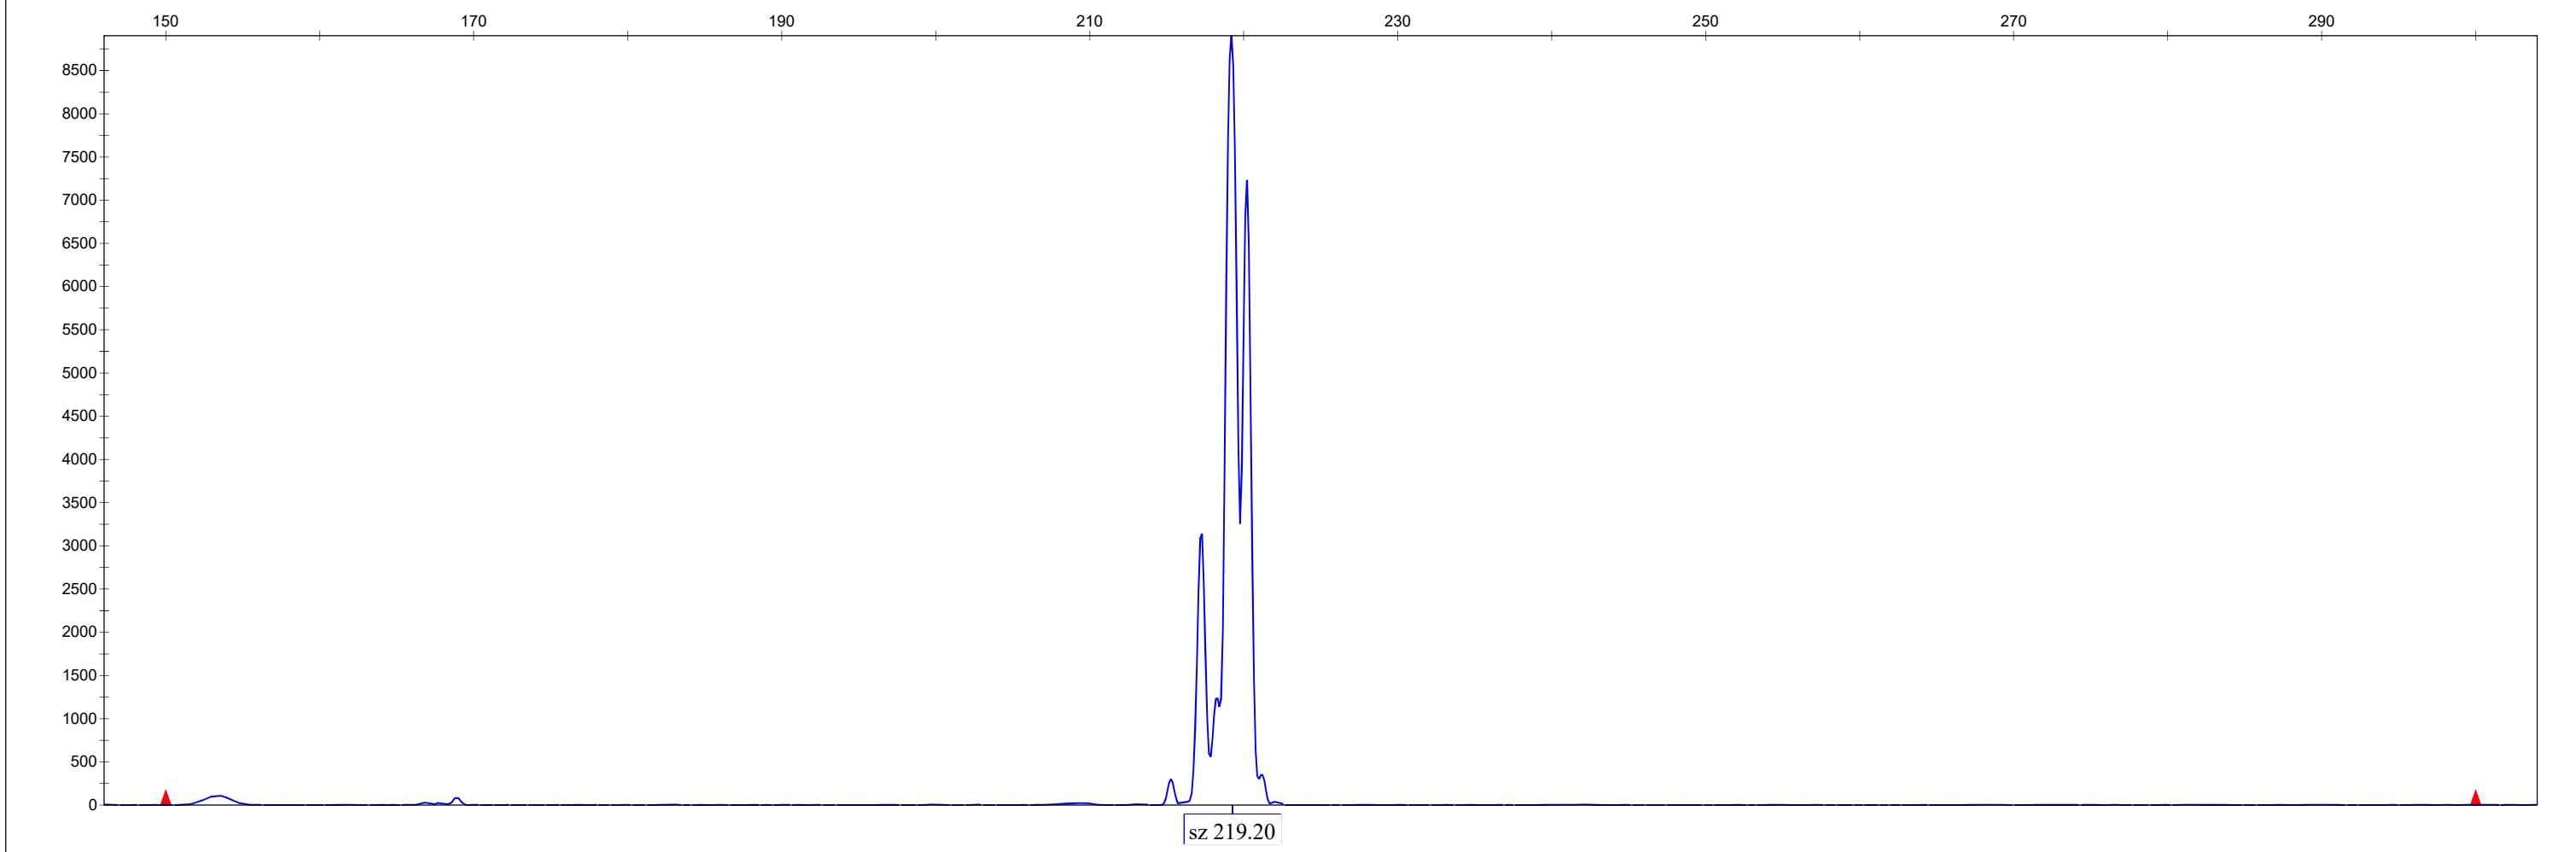

|                     |    |     |     |  |  |  |  |  |  |  |  |  |  |  |  |  |  |  |  |  |
|---------------------|----|-----|-----|--|--|--|--|--|--|--|--|--|--|--|--|--|--|--|--|--|
| 38 F05_011 Seq1.fsa | 38 | BC3 | BC3 |  |  |  |  |  |  |  |  |  |  |  |  |  |  |  |  |  |
|---------------------|----|-----|-----|--|--|--|--|--|--|--|--|--|--|--|--|--|--|--|--|--|

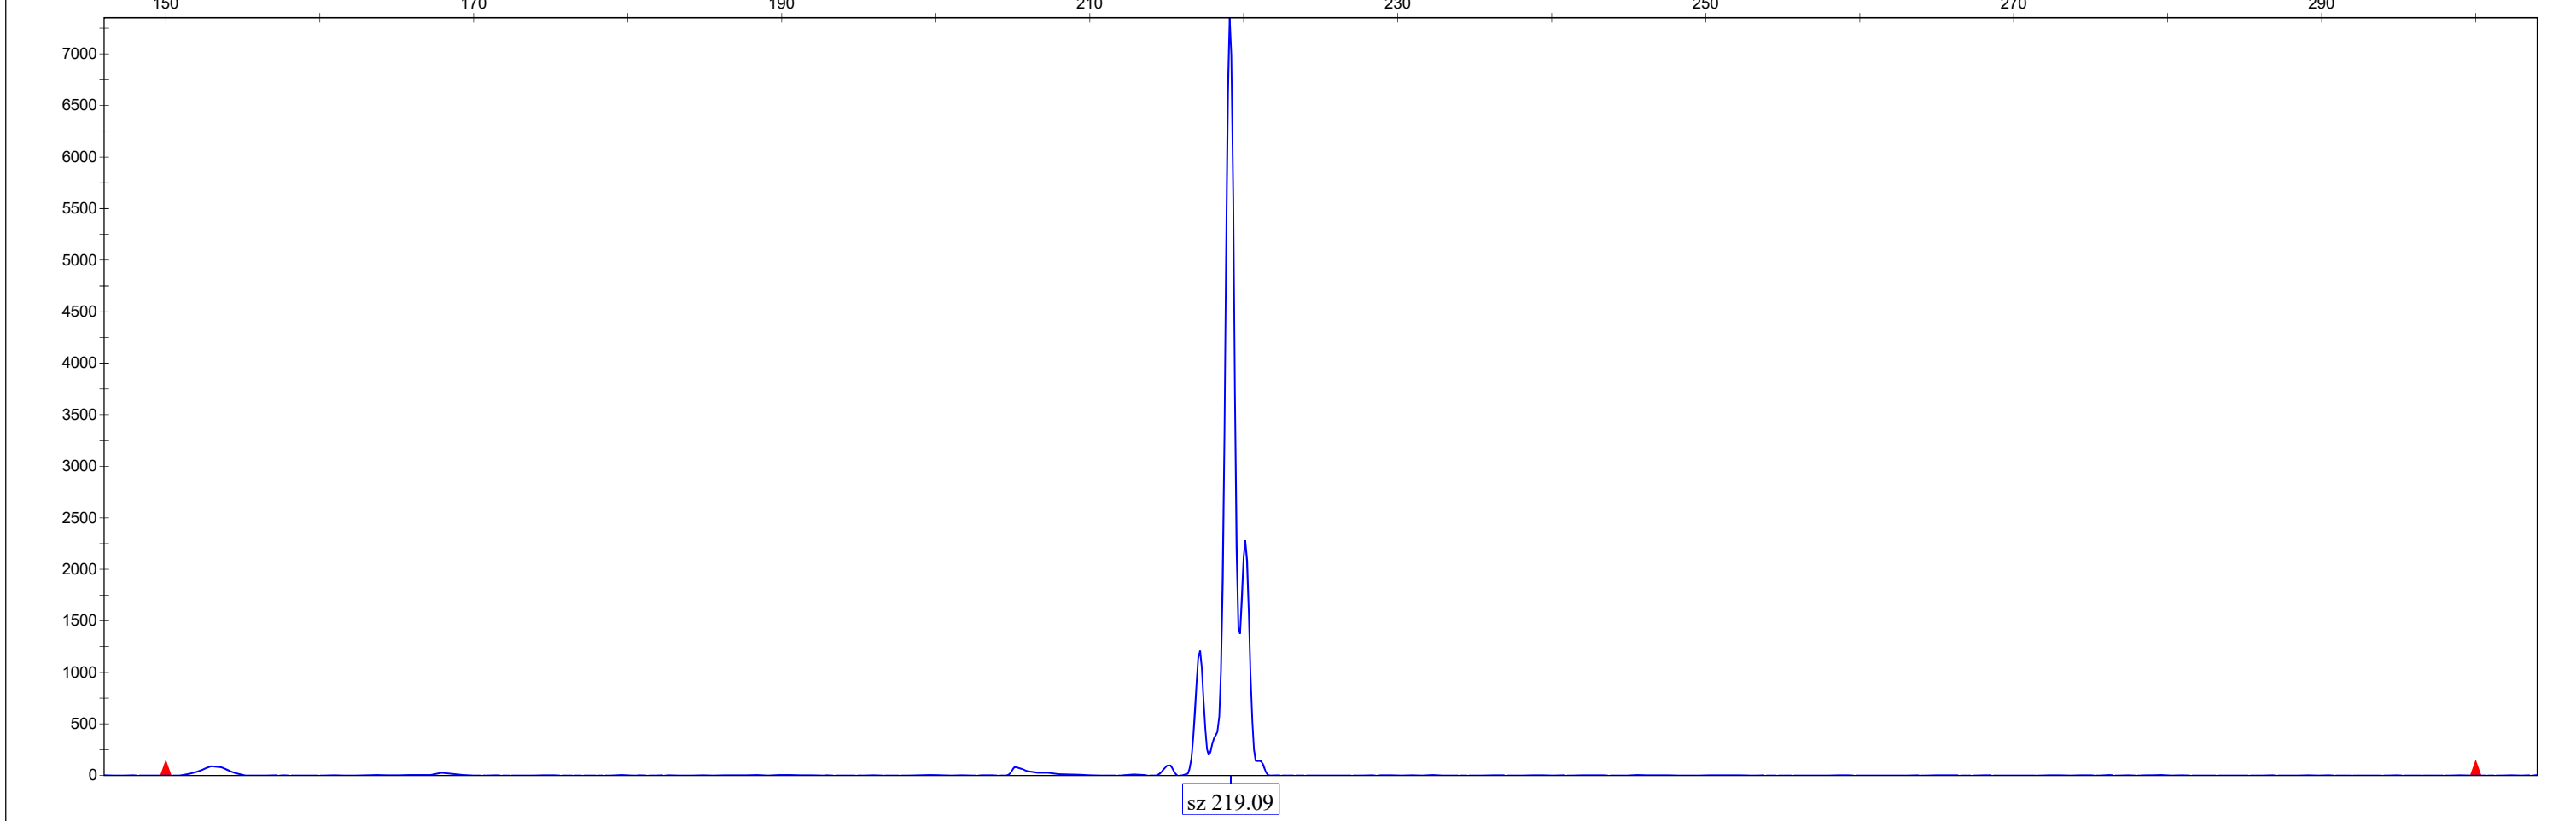

|                     |    |     |     |  |  |  |  |  |  |  |  |  |  |  |  |  |  |  |  |  |
|---------------------|----|-----|-----|--|--|--|--|--|--|--|--|--|--|--|--|--|--|--|--|--|
| 39 G05_013 Seq1.fsa | 39 | BC3 | BC3 |  |  |  |  |  |  |  |  |  |  |  |  |  |  |  |  |  |
|---------------------|----|-----|-----|--|--|--|--|--|--|--|--|--|--|--|--|--|--|--|--|--|

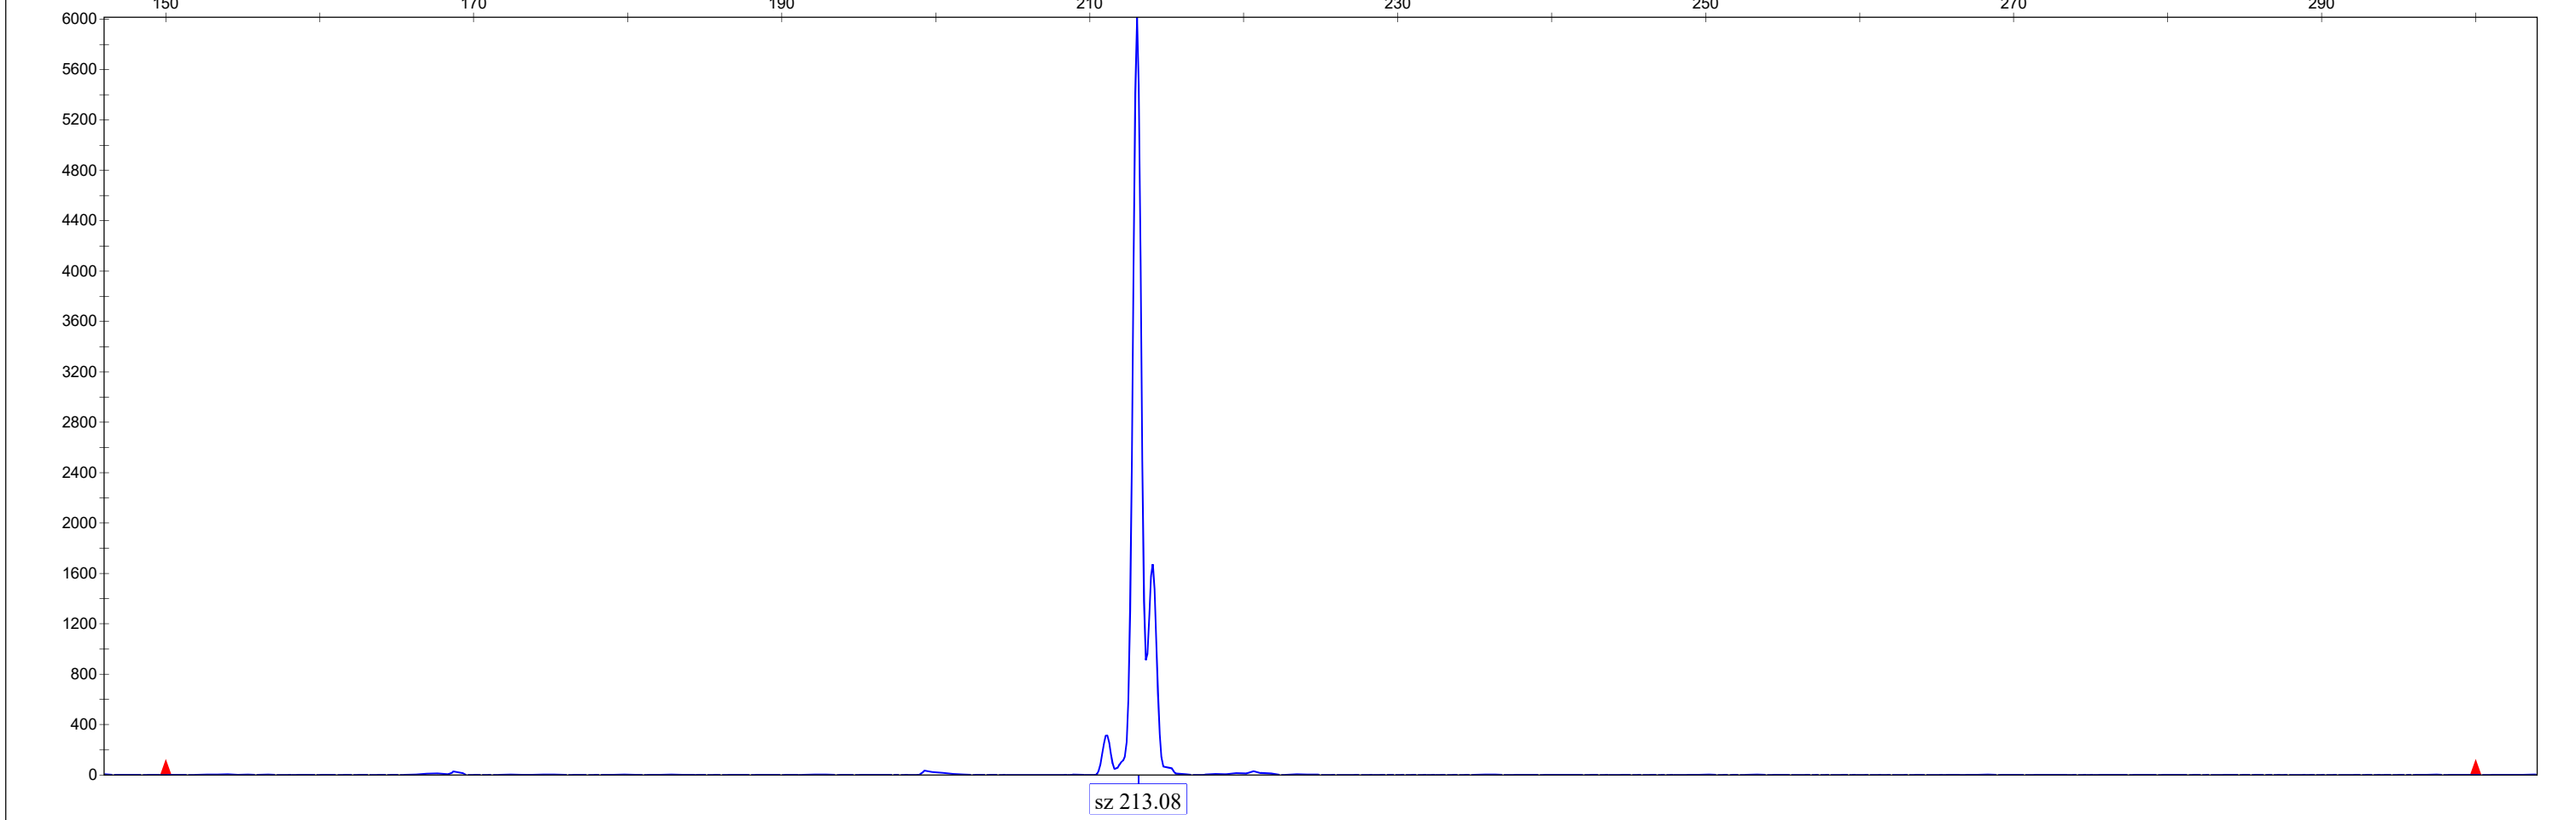

|                     |    |     |     |  |  |  |  |  |  |  |  |  |  |  |  |  |  |  |  |  |
|---------------------|----|-----|-----|--|--|--|--|--|--|--|--|--|--|--|--|--|--|--|--|--|
| 40 H05_015 Seq1.fsa | 40 | BC3 | BC3 |  |  |  |  |  |  |  |  |  |  |  |  |  |  |  |  |  |
|---------------------|----|-----|-----|--|--|--|--|--|--|--|--|--|--|--|--|--|--|--|--|--|

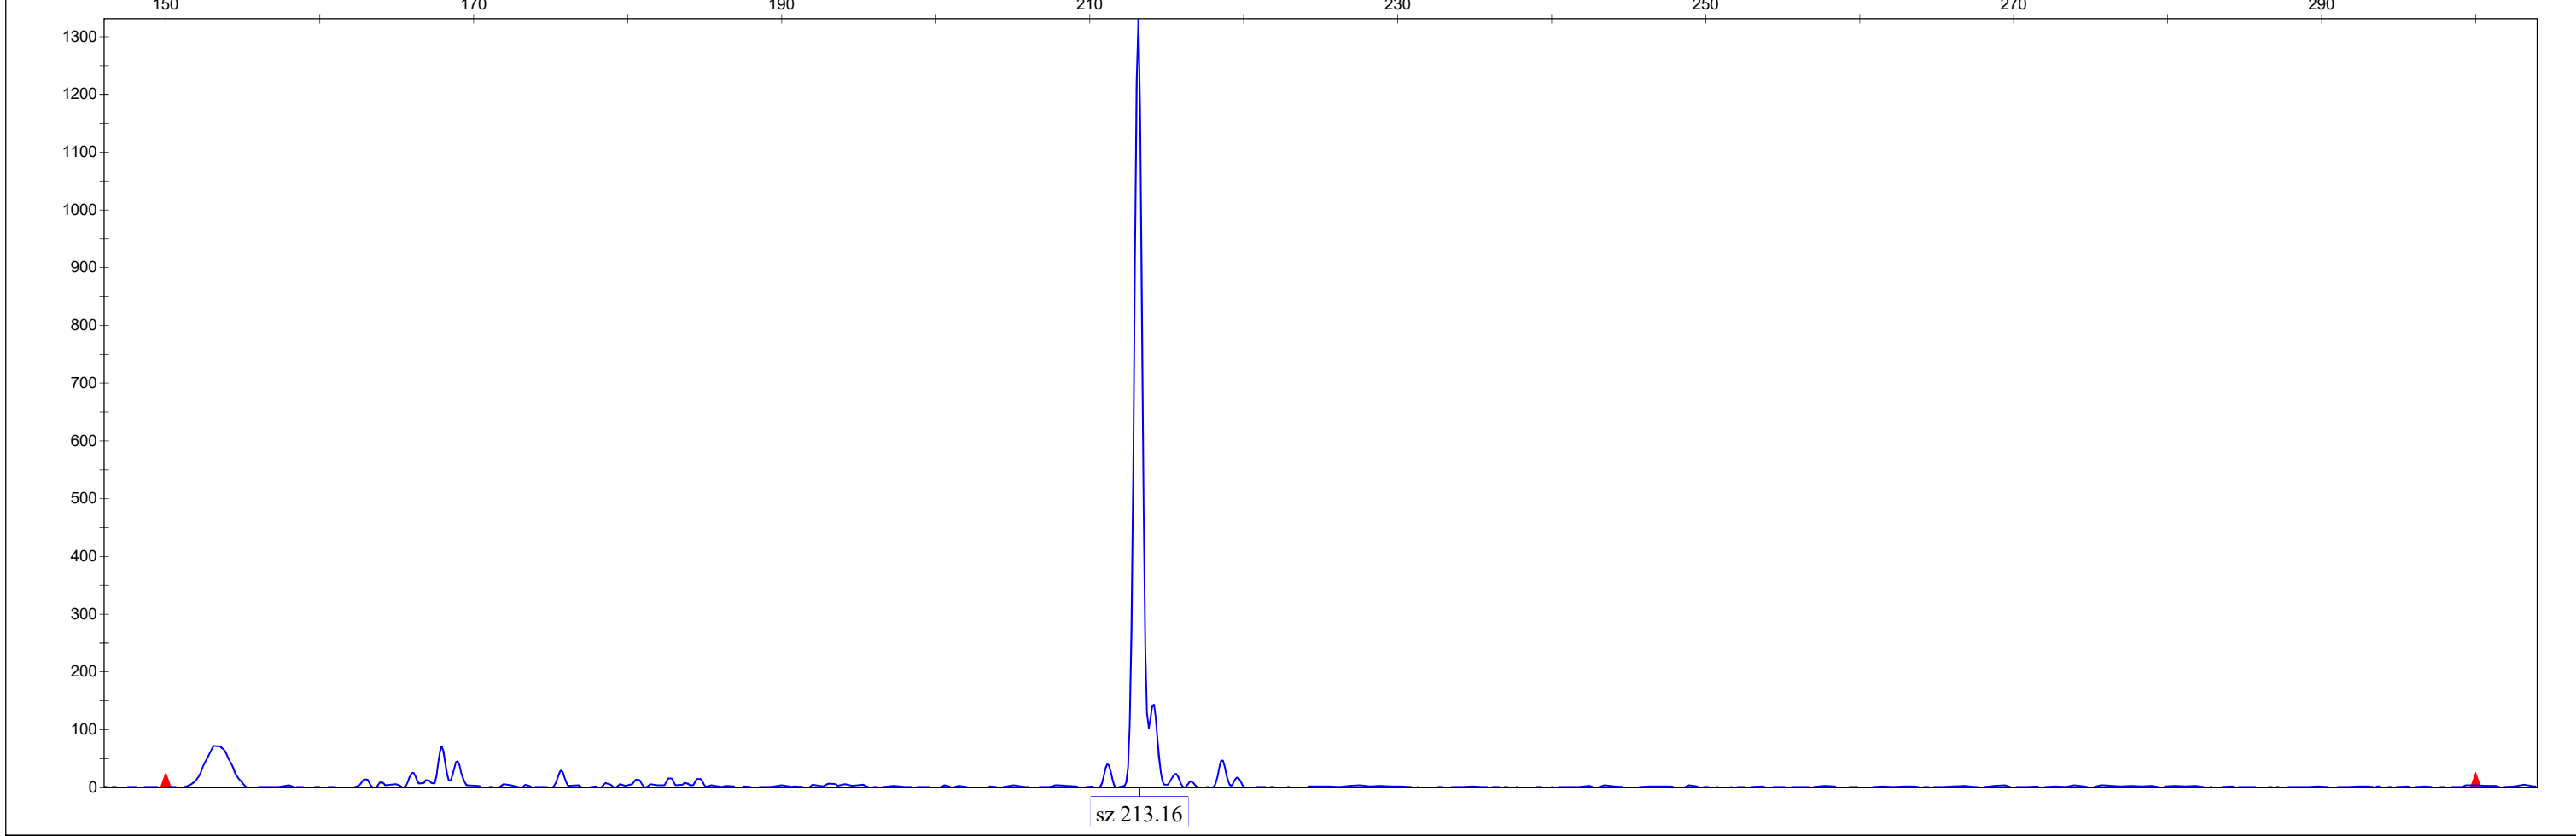

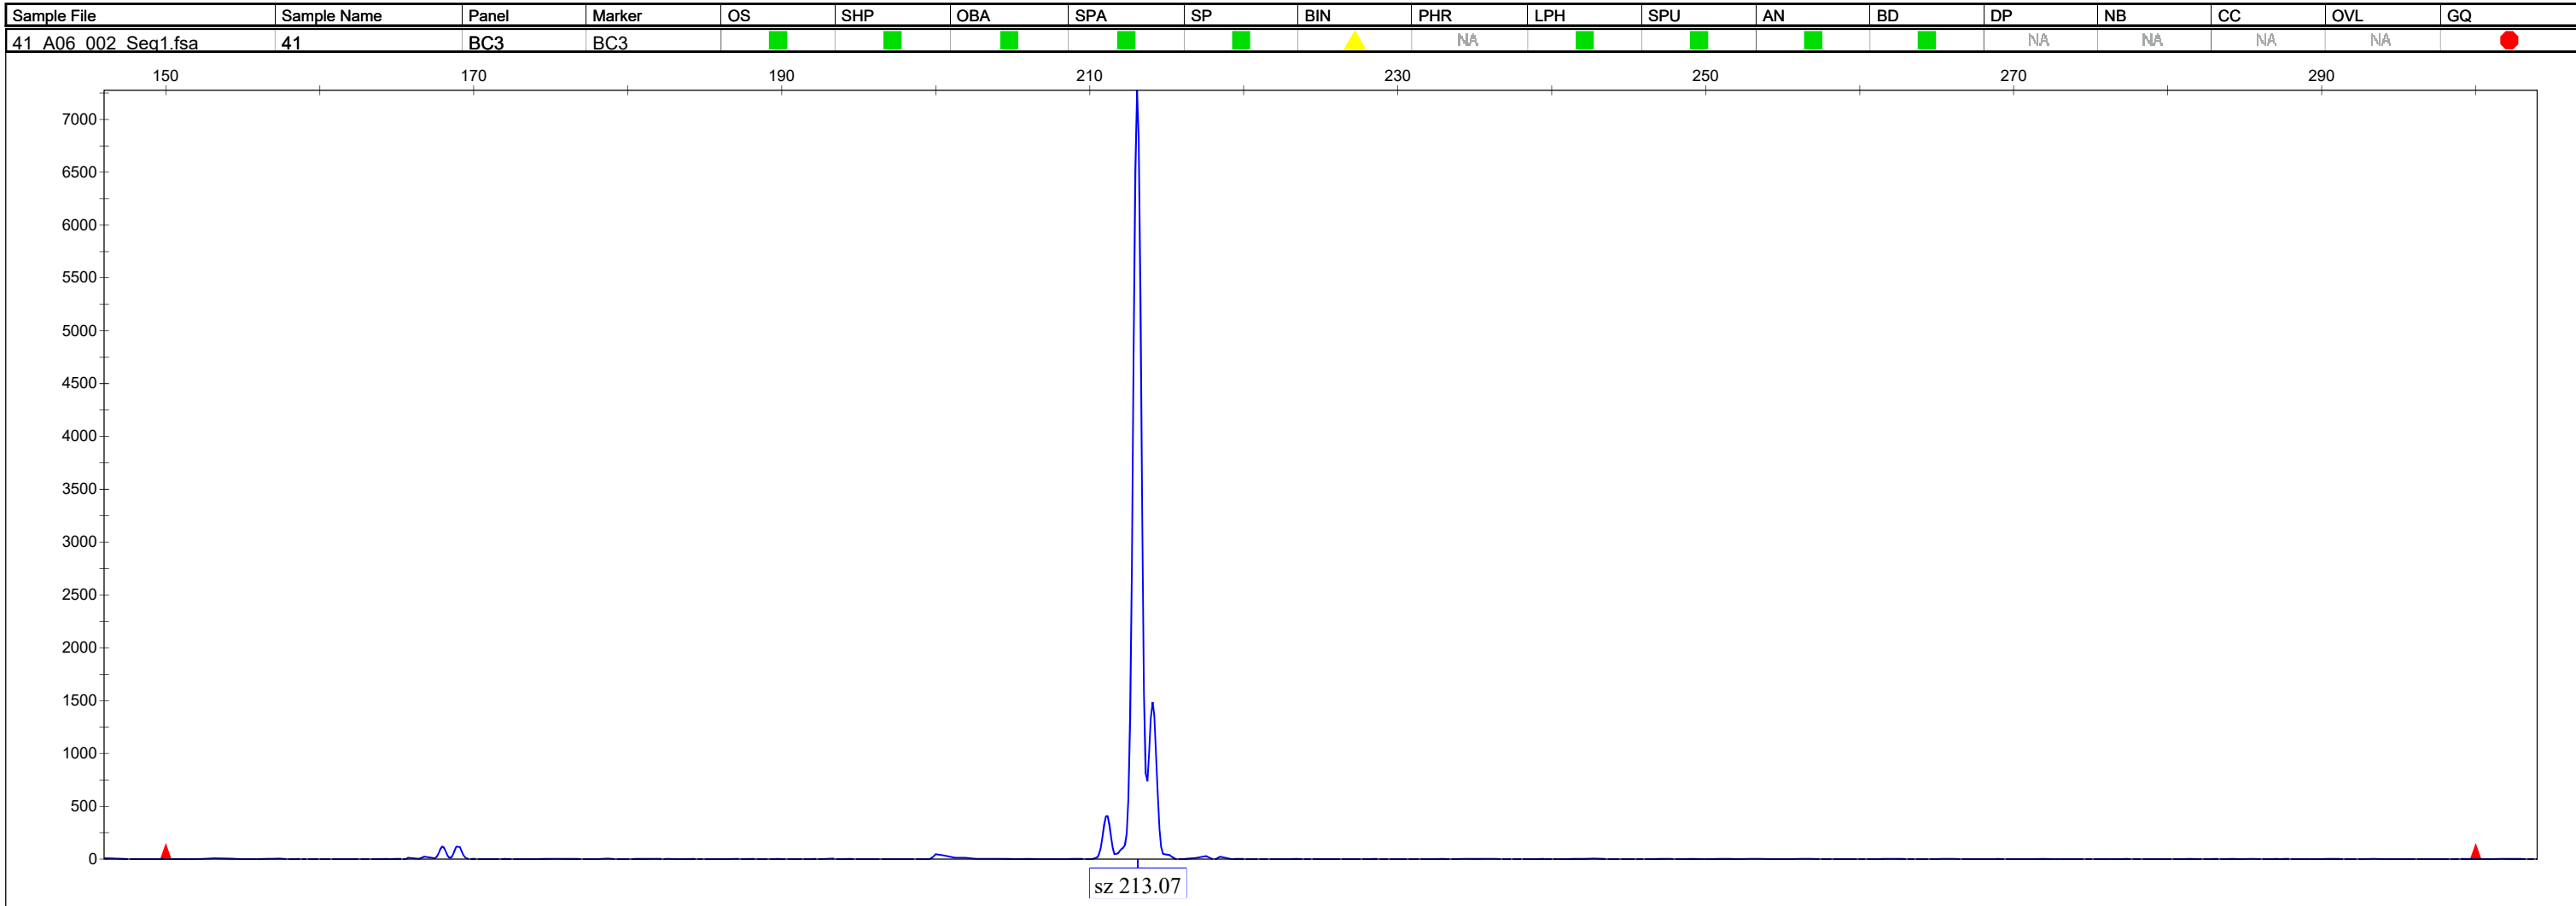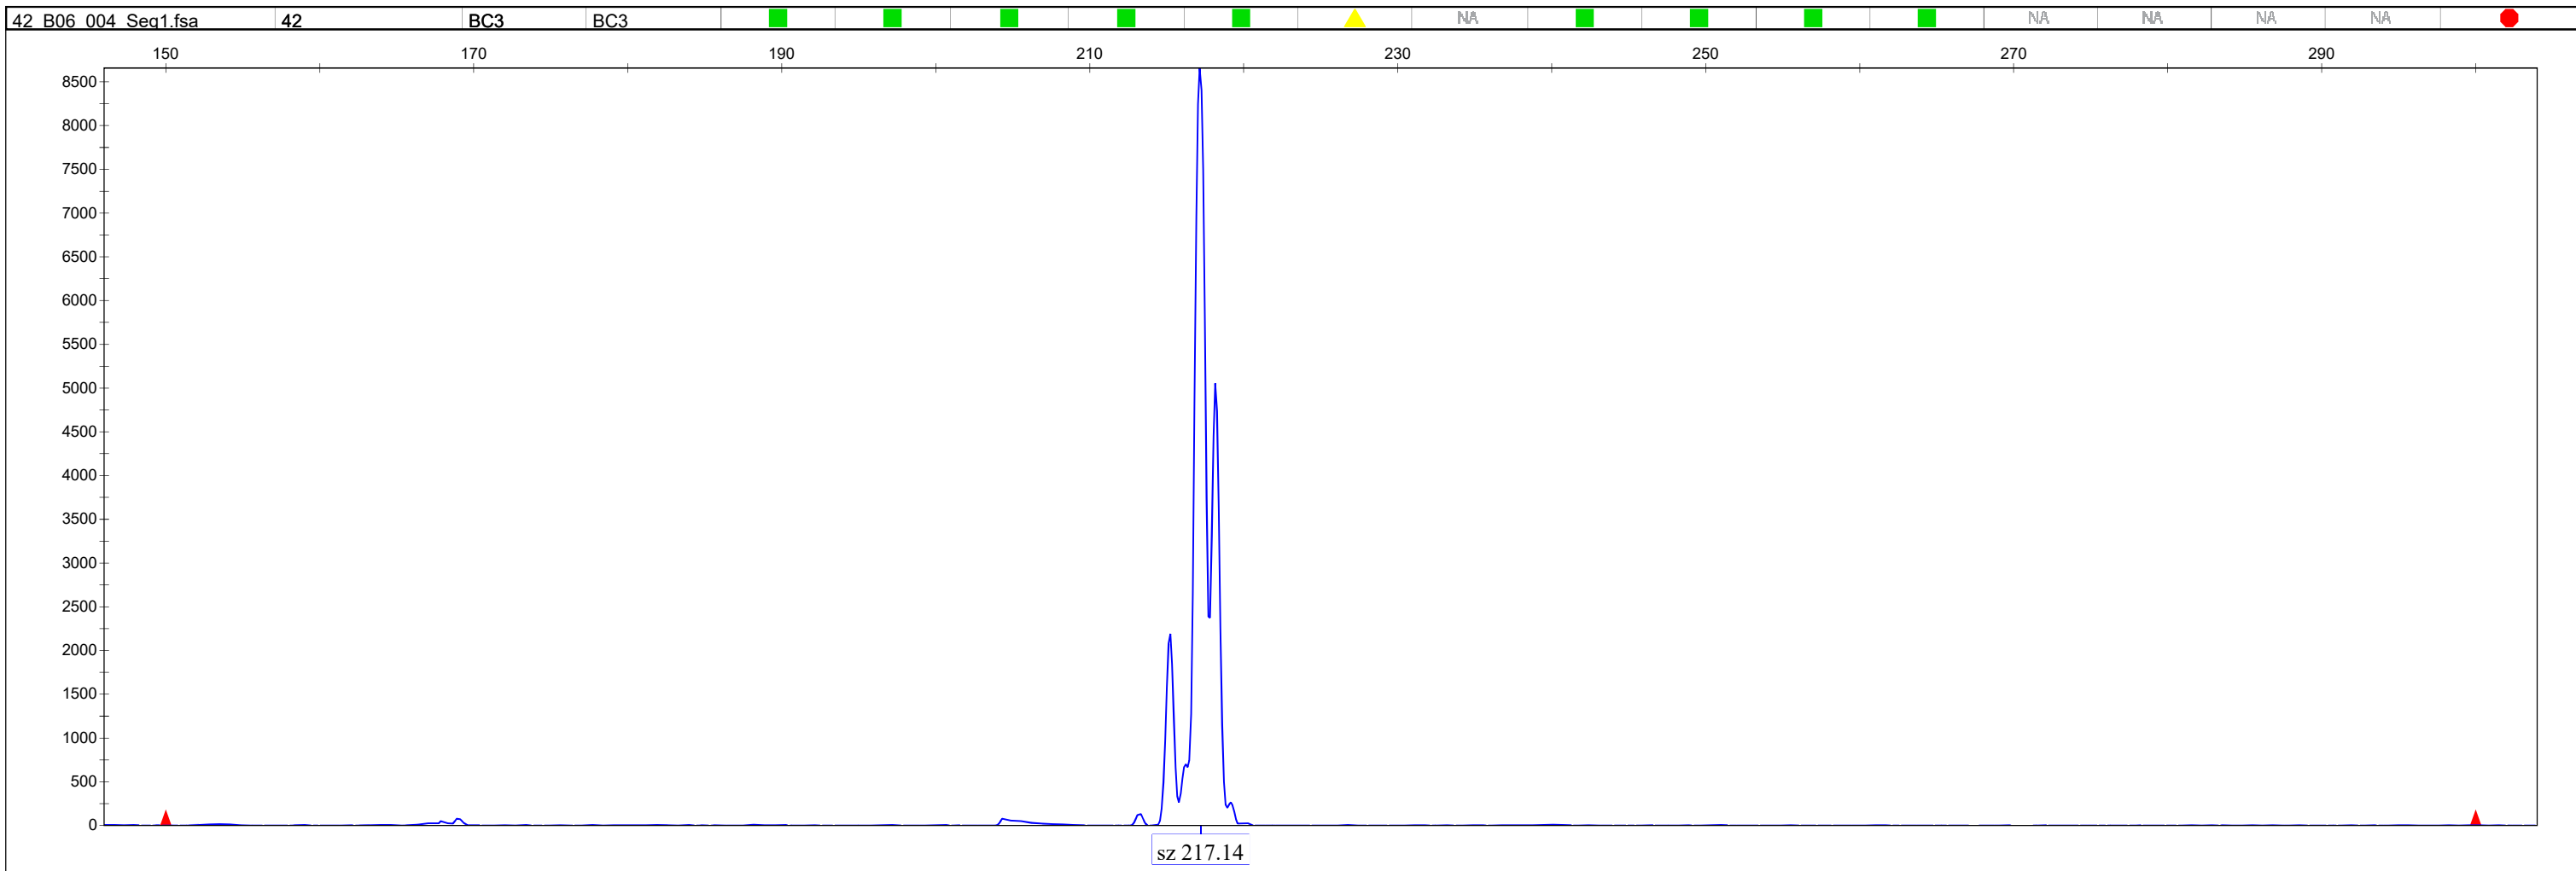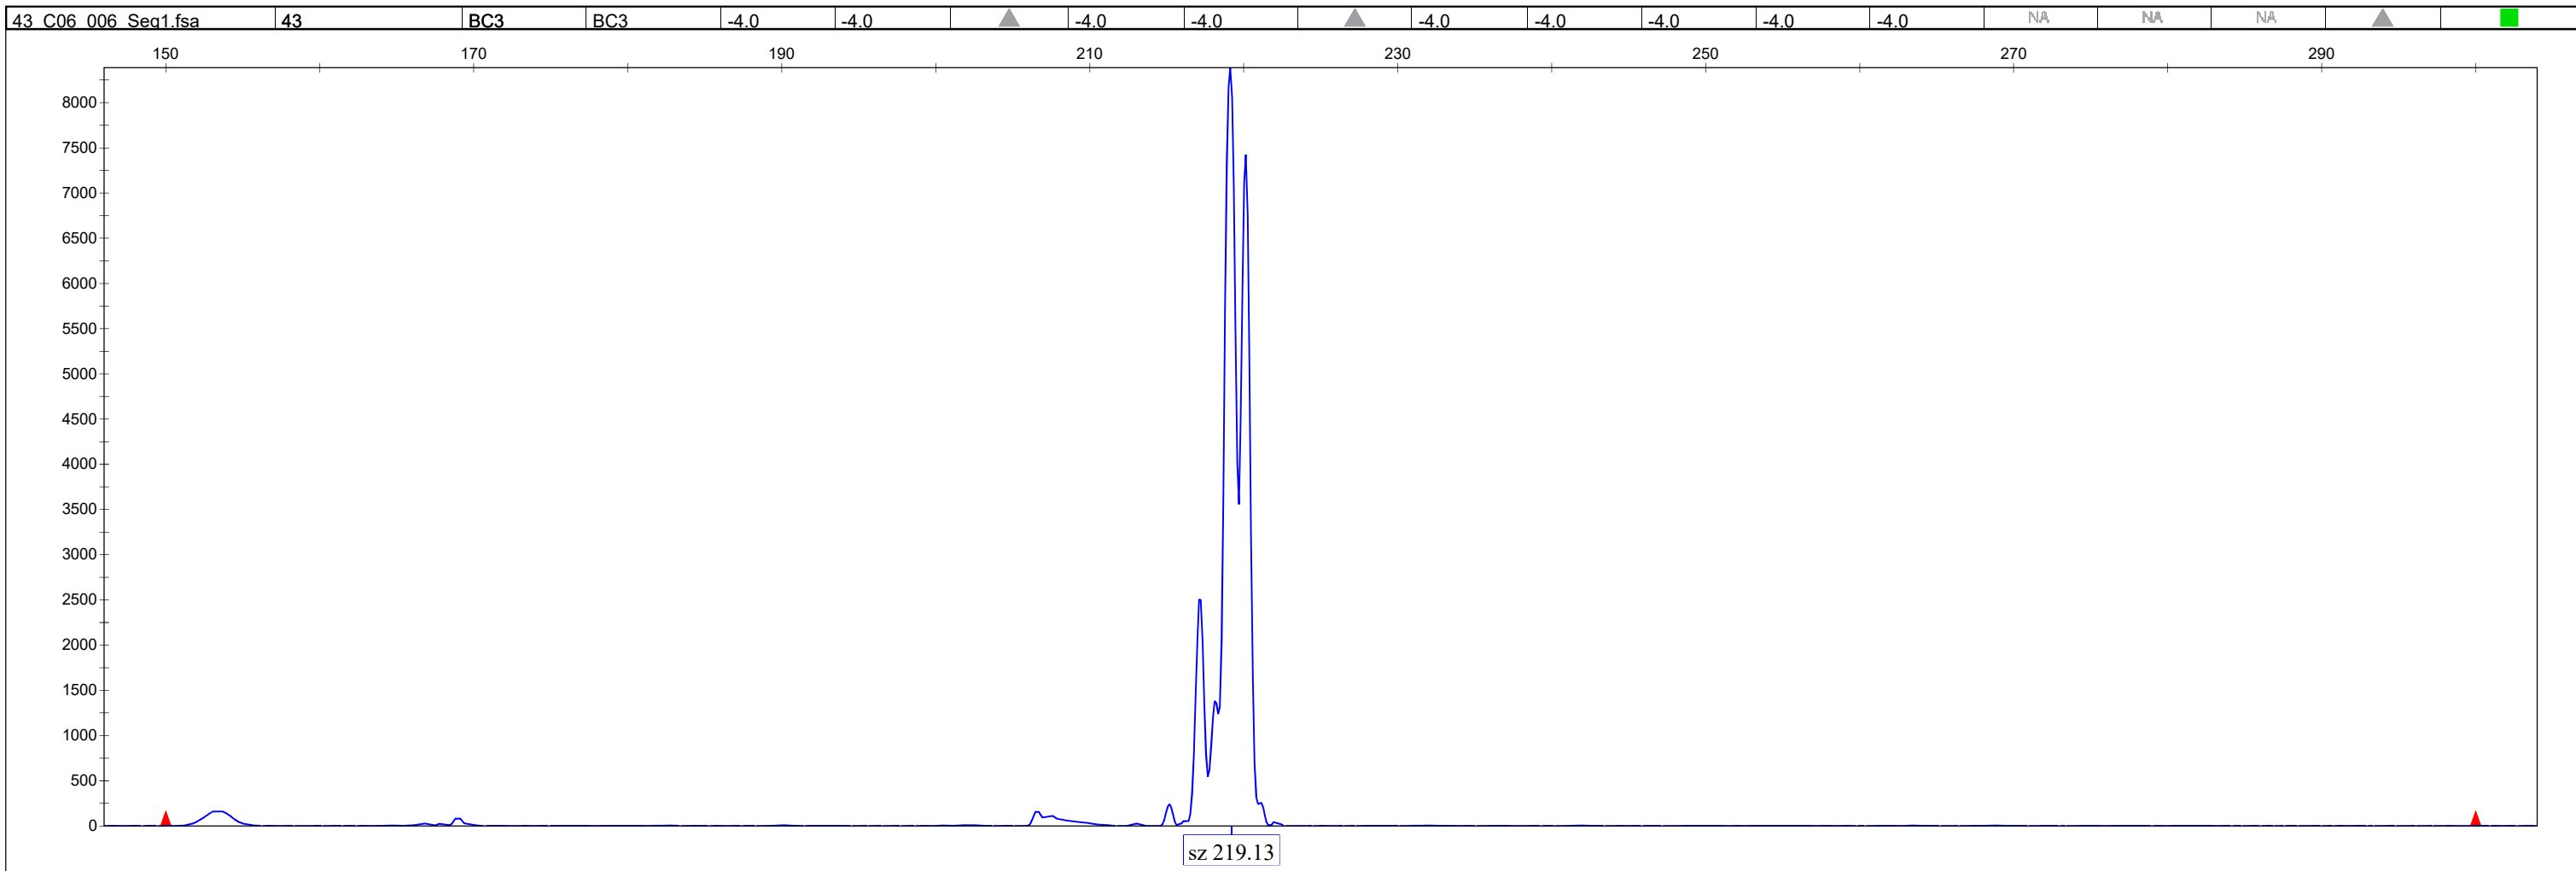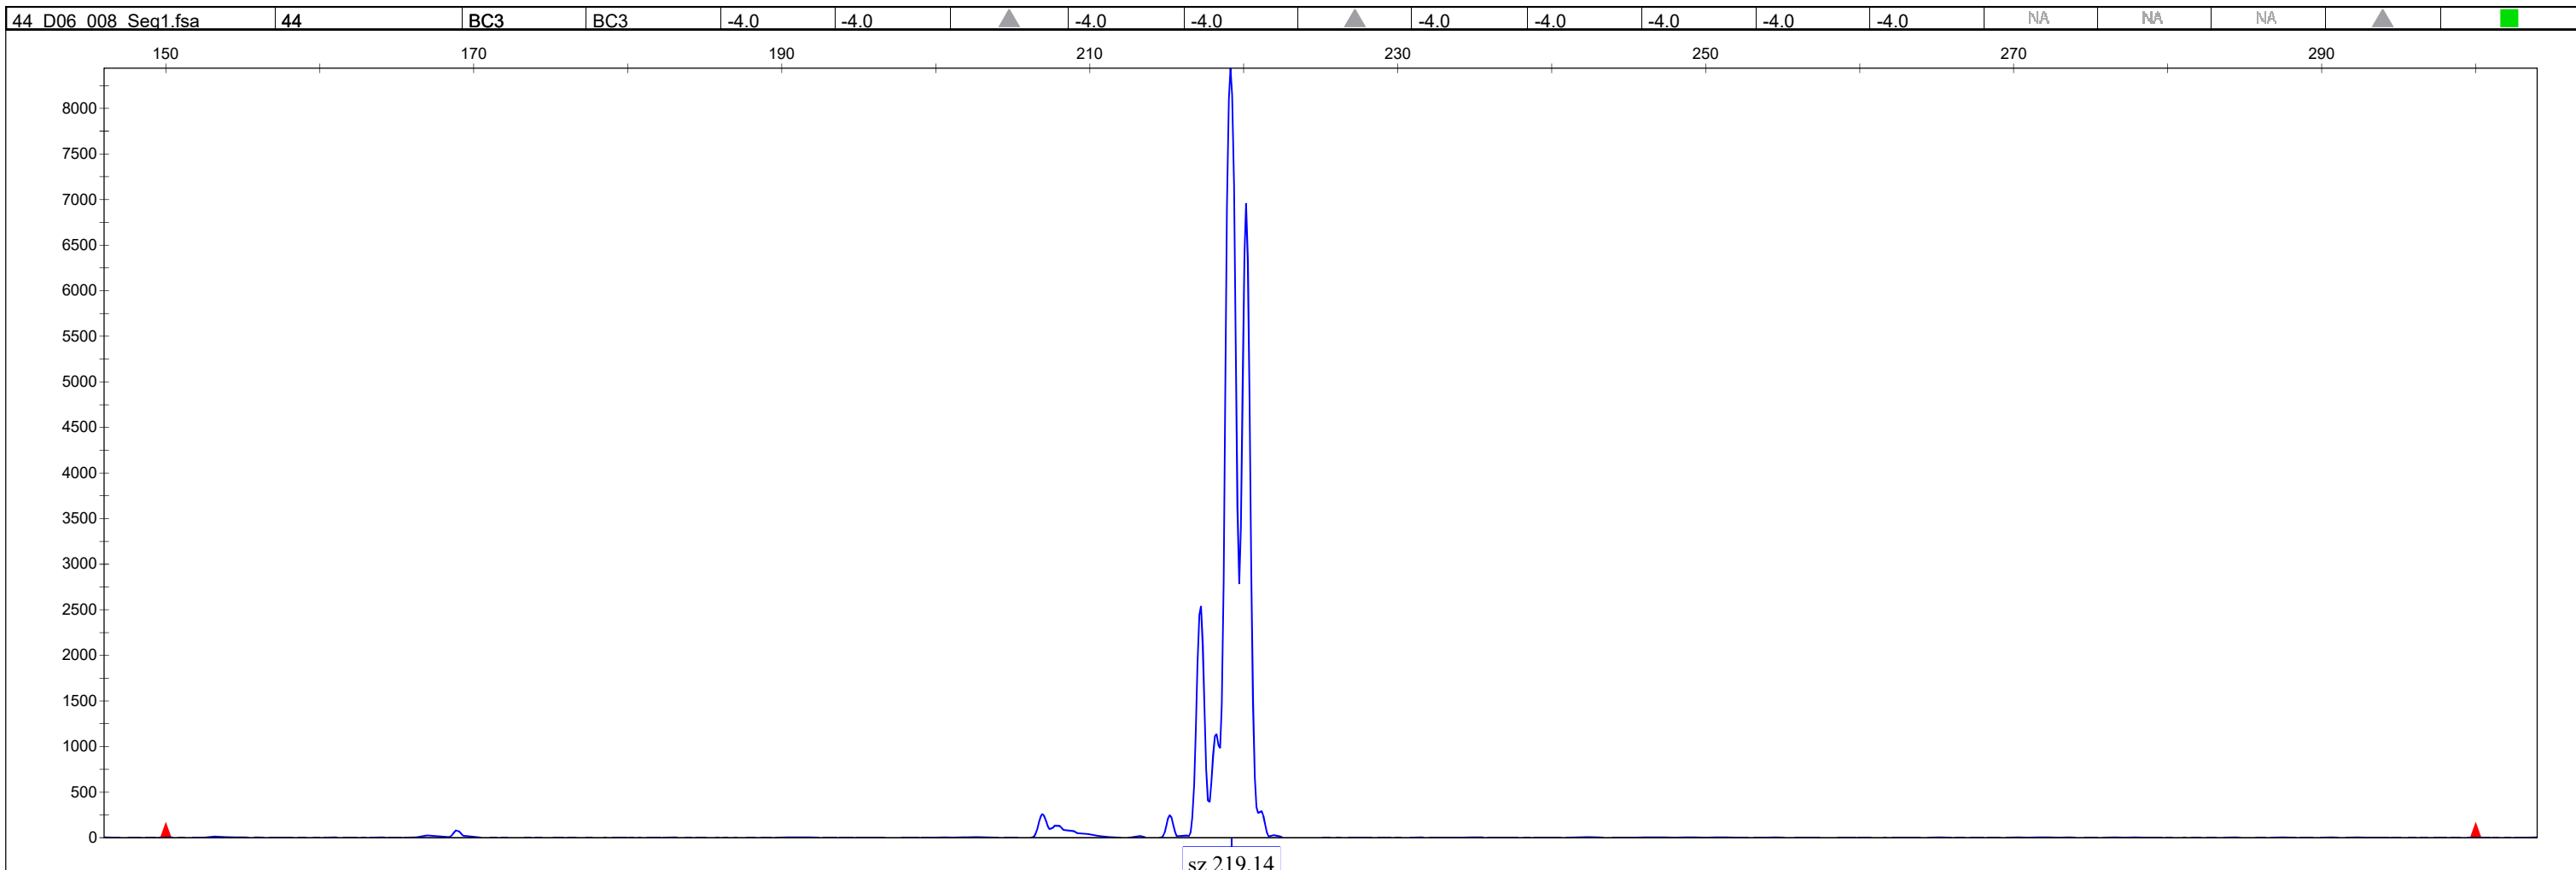

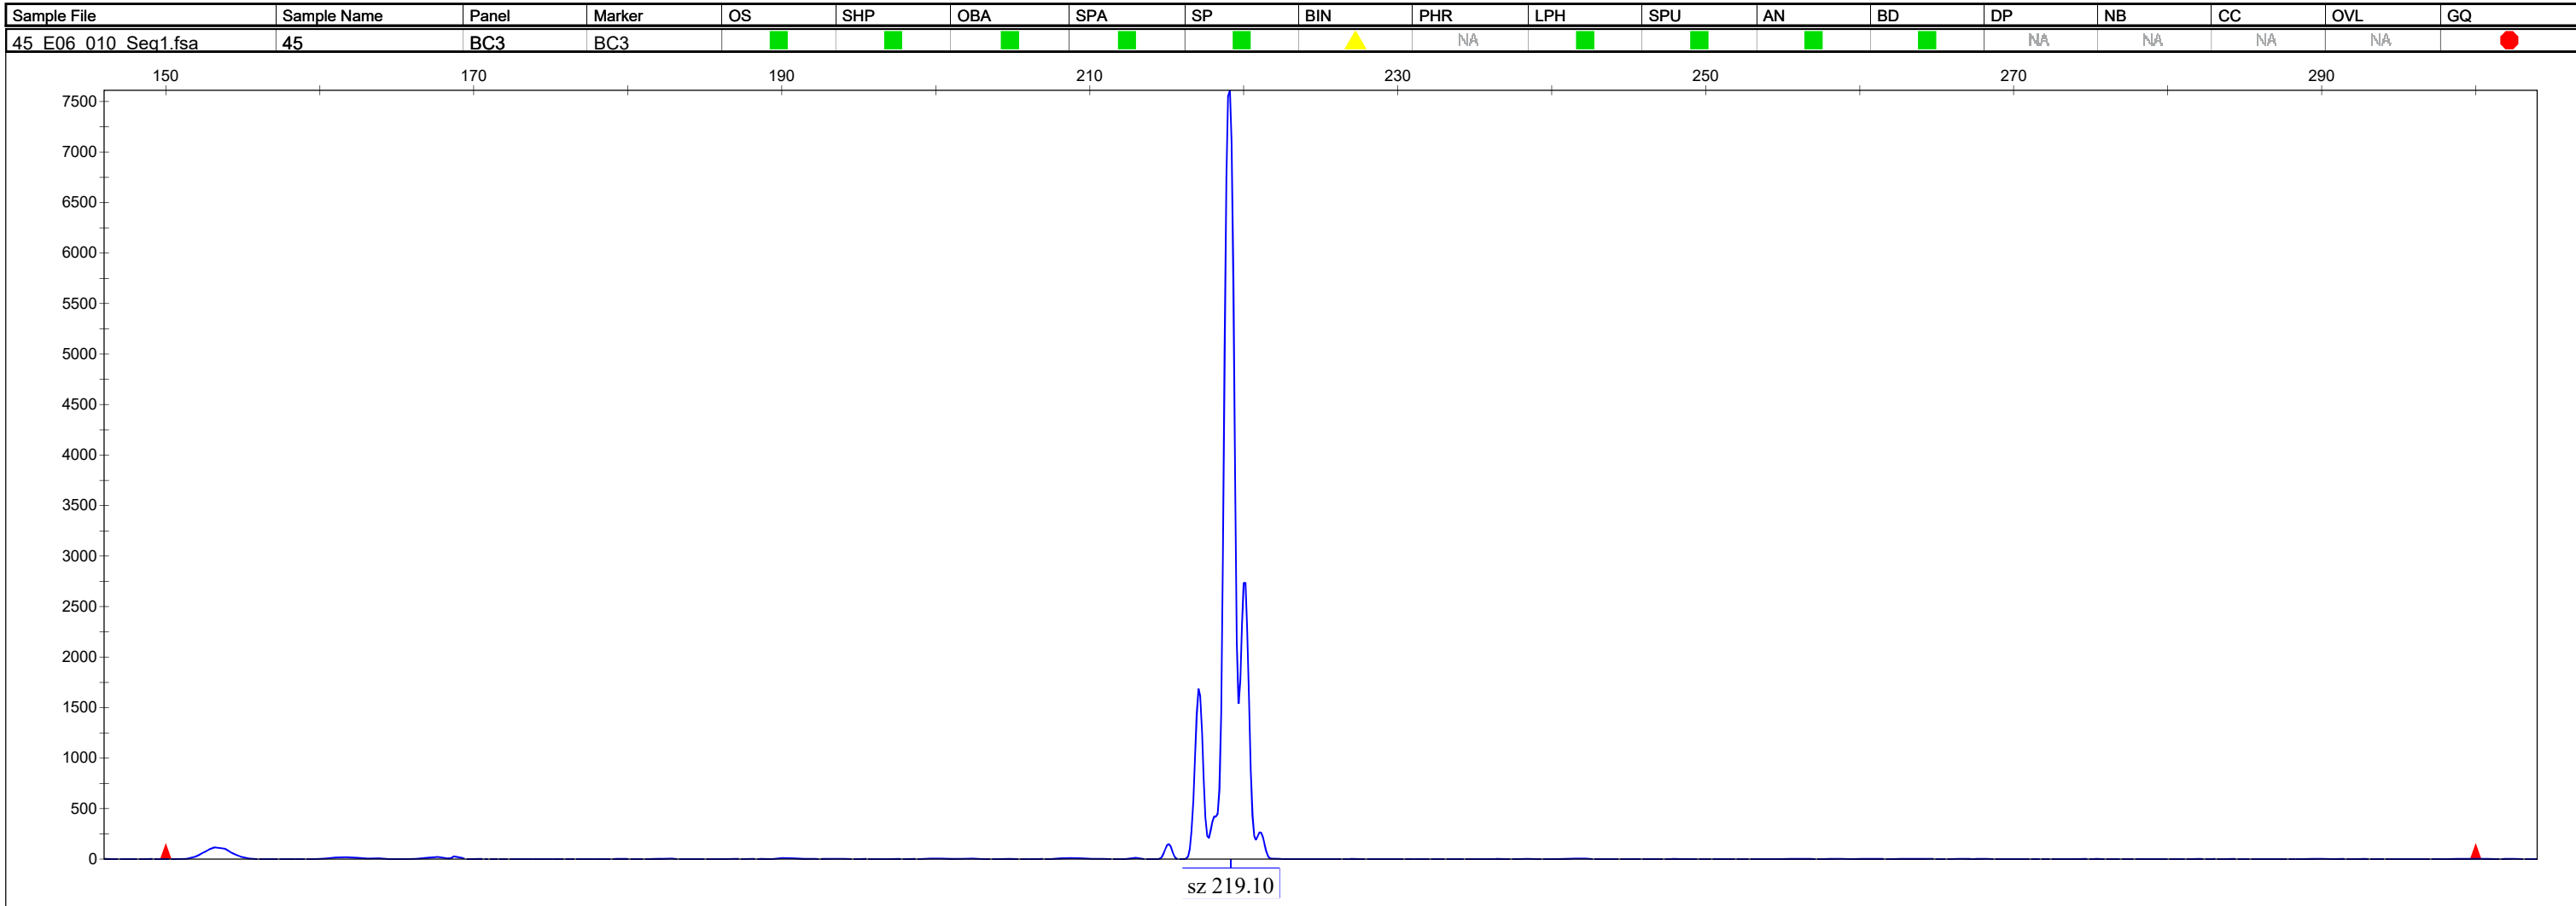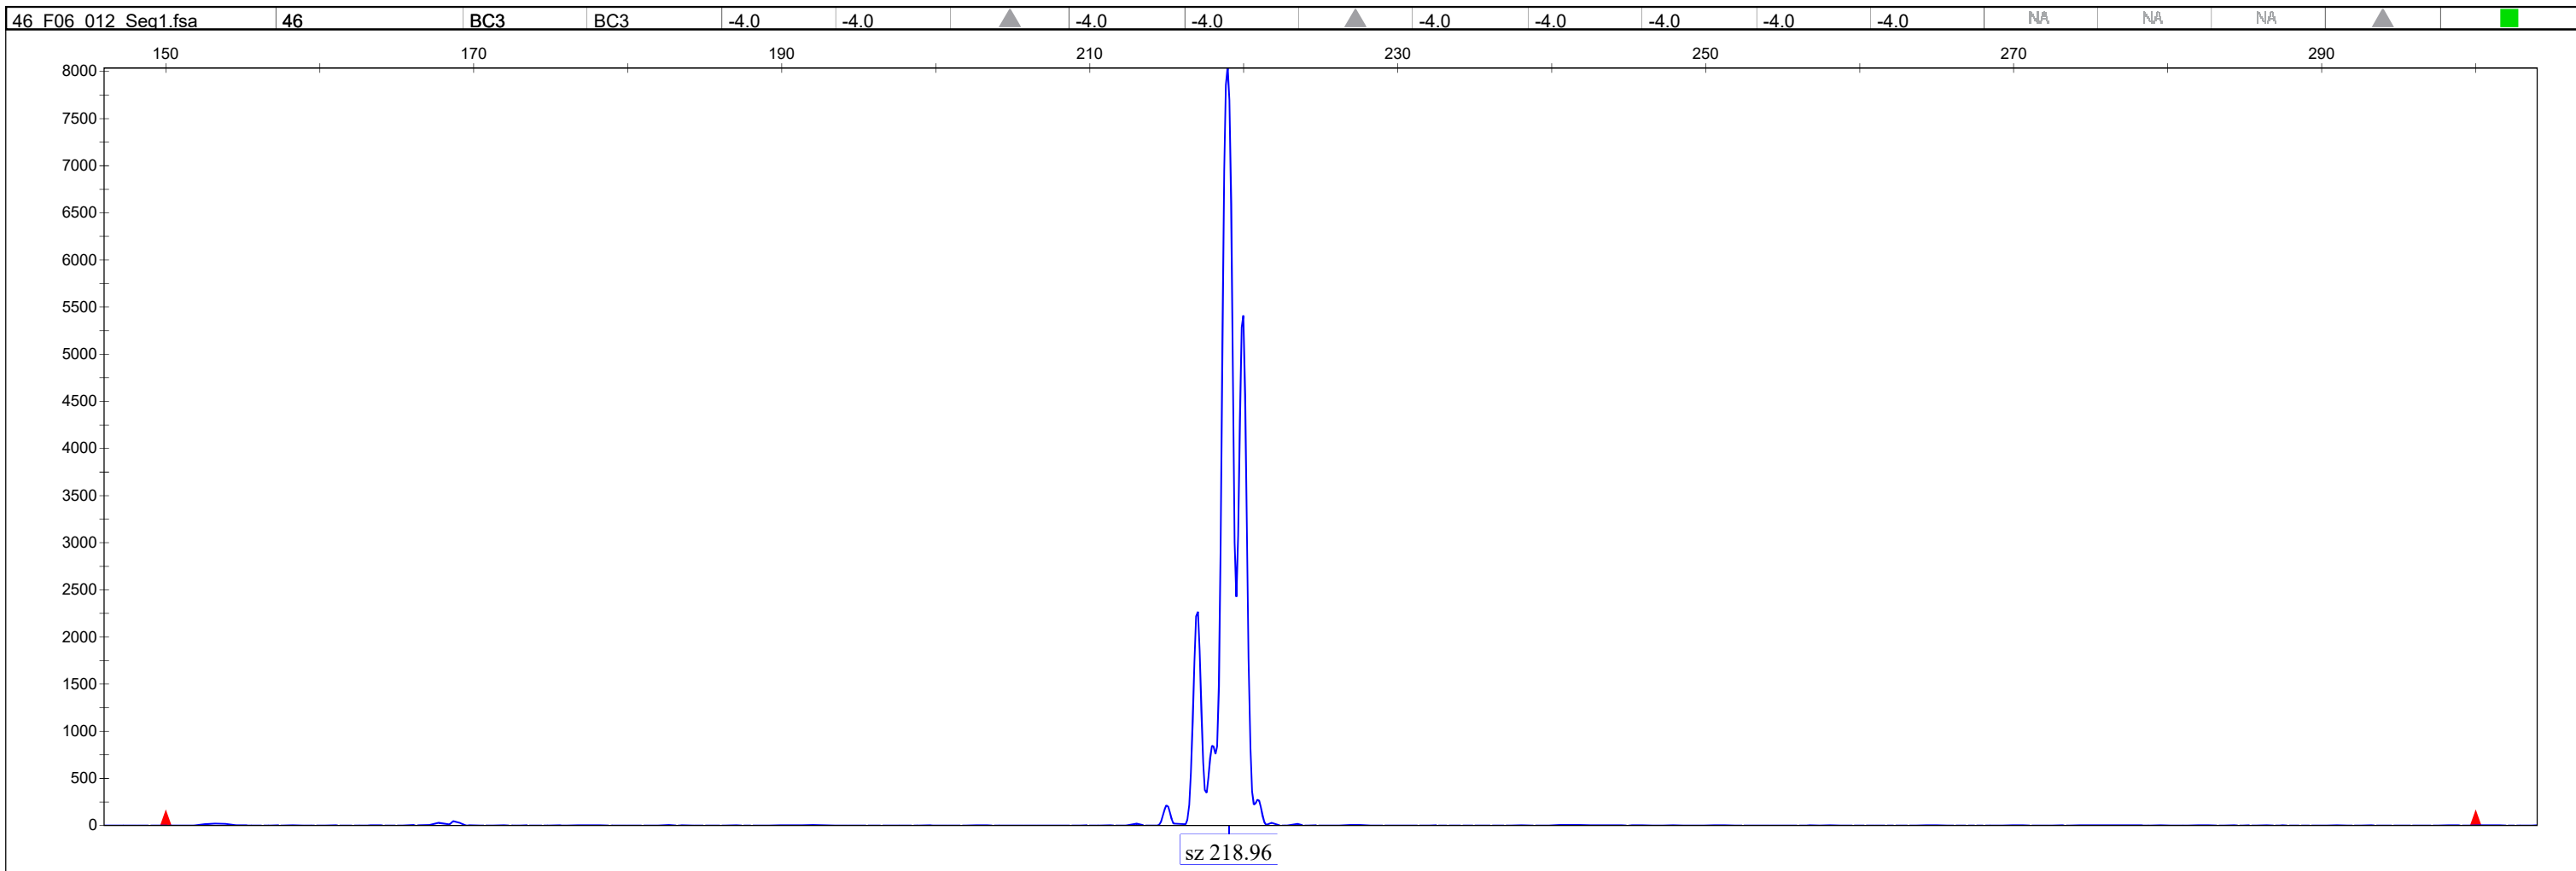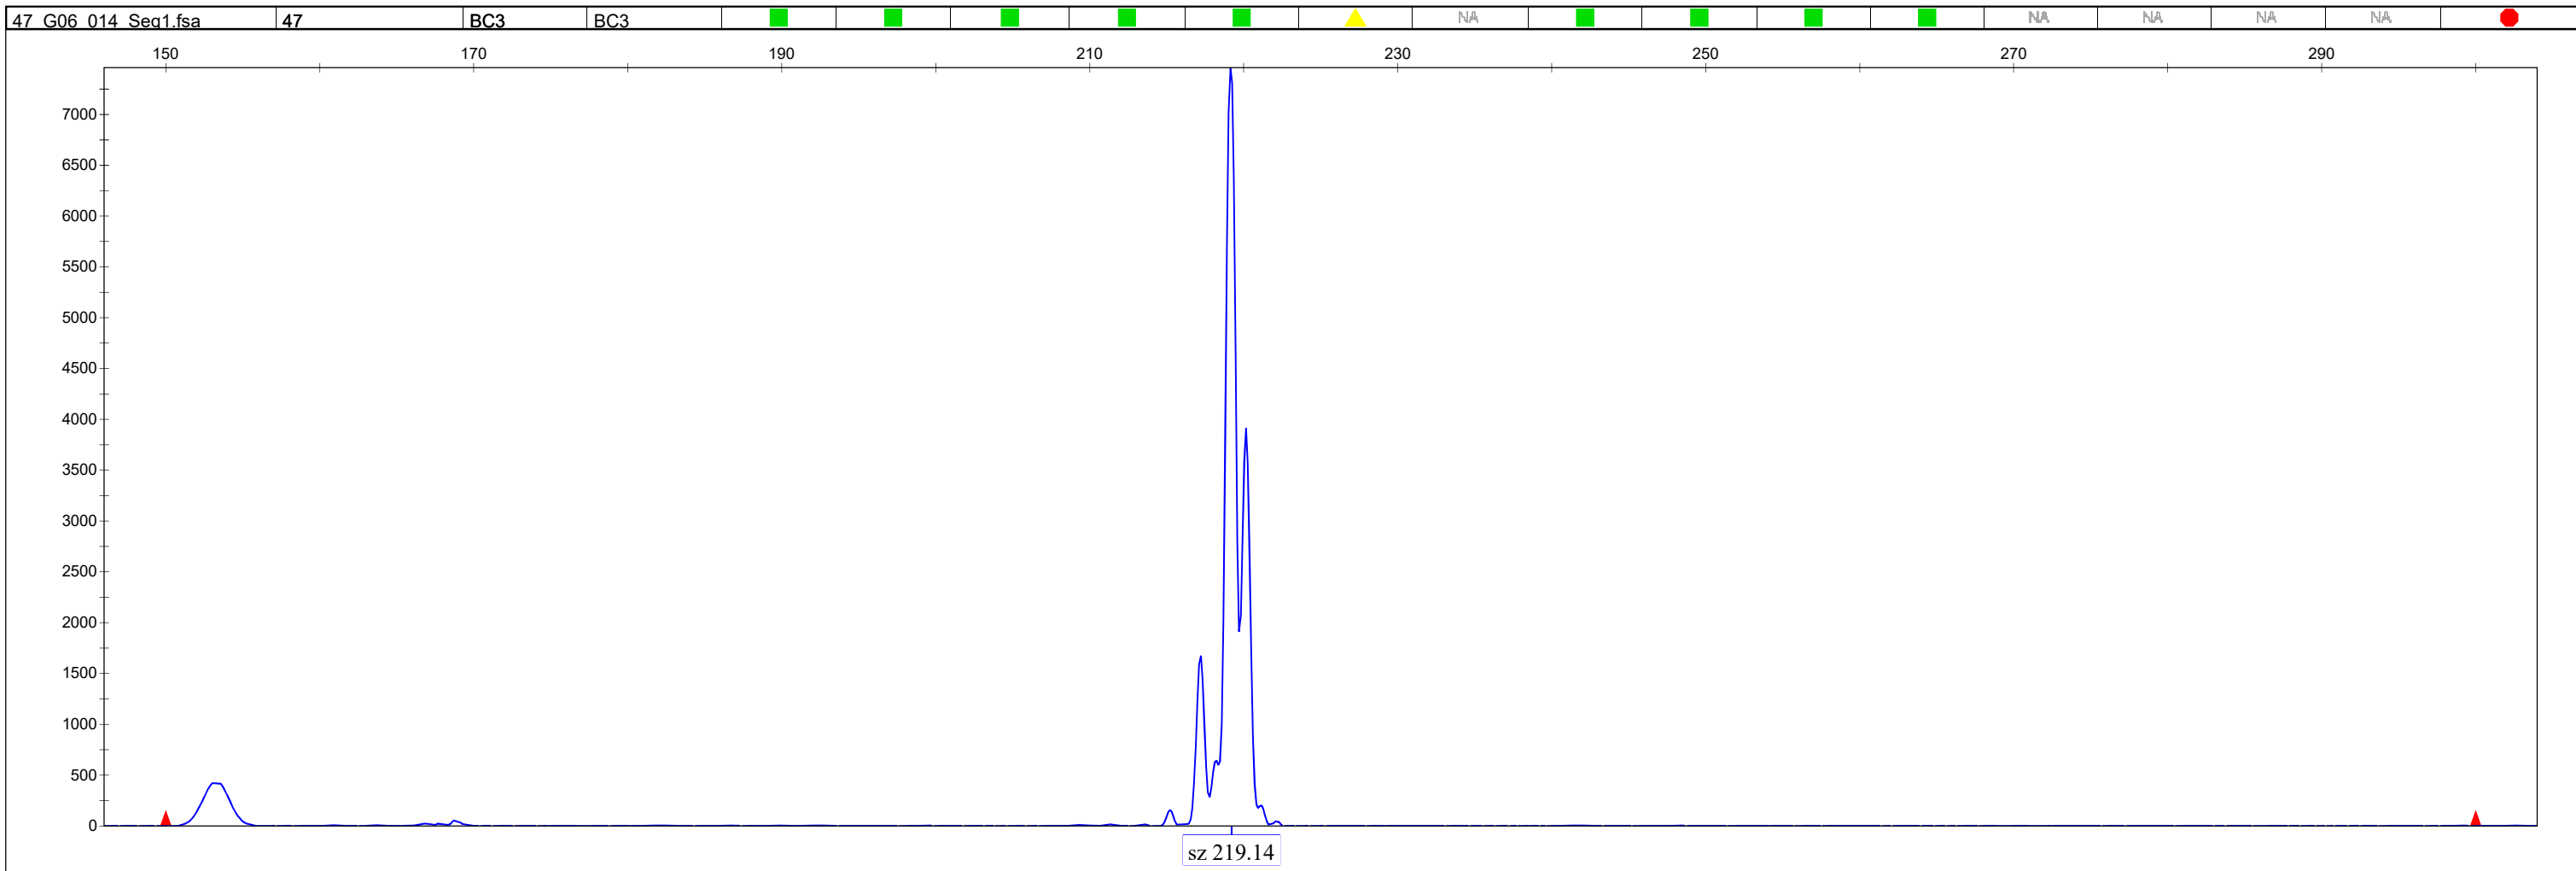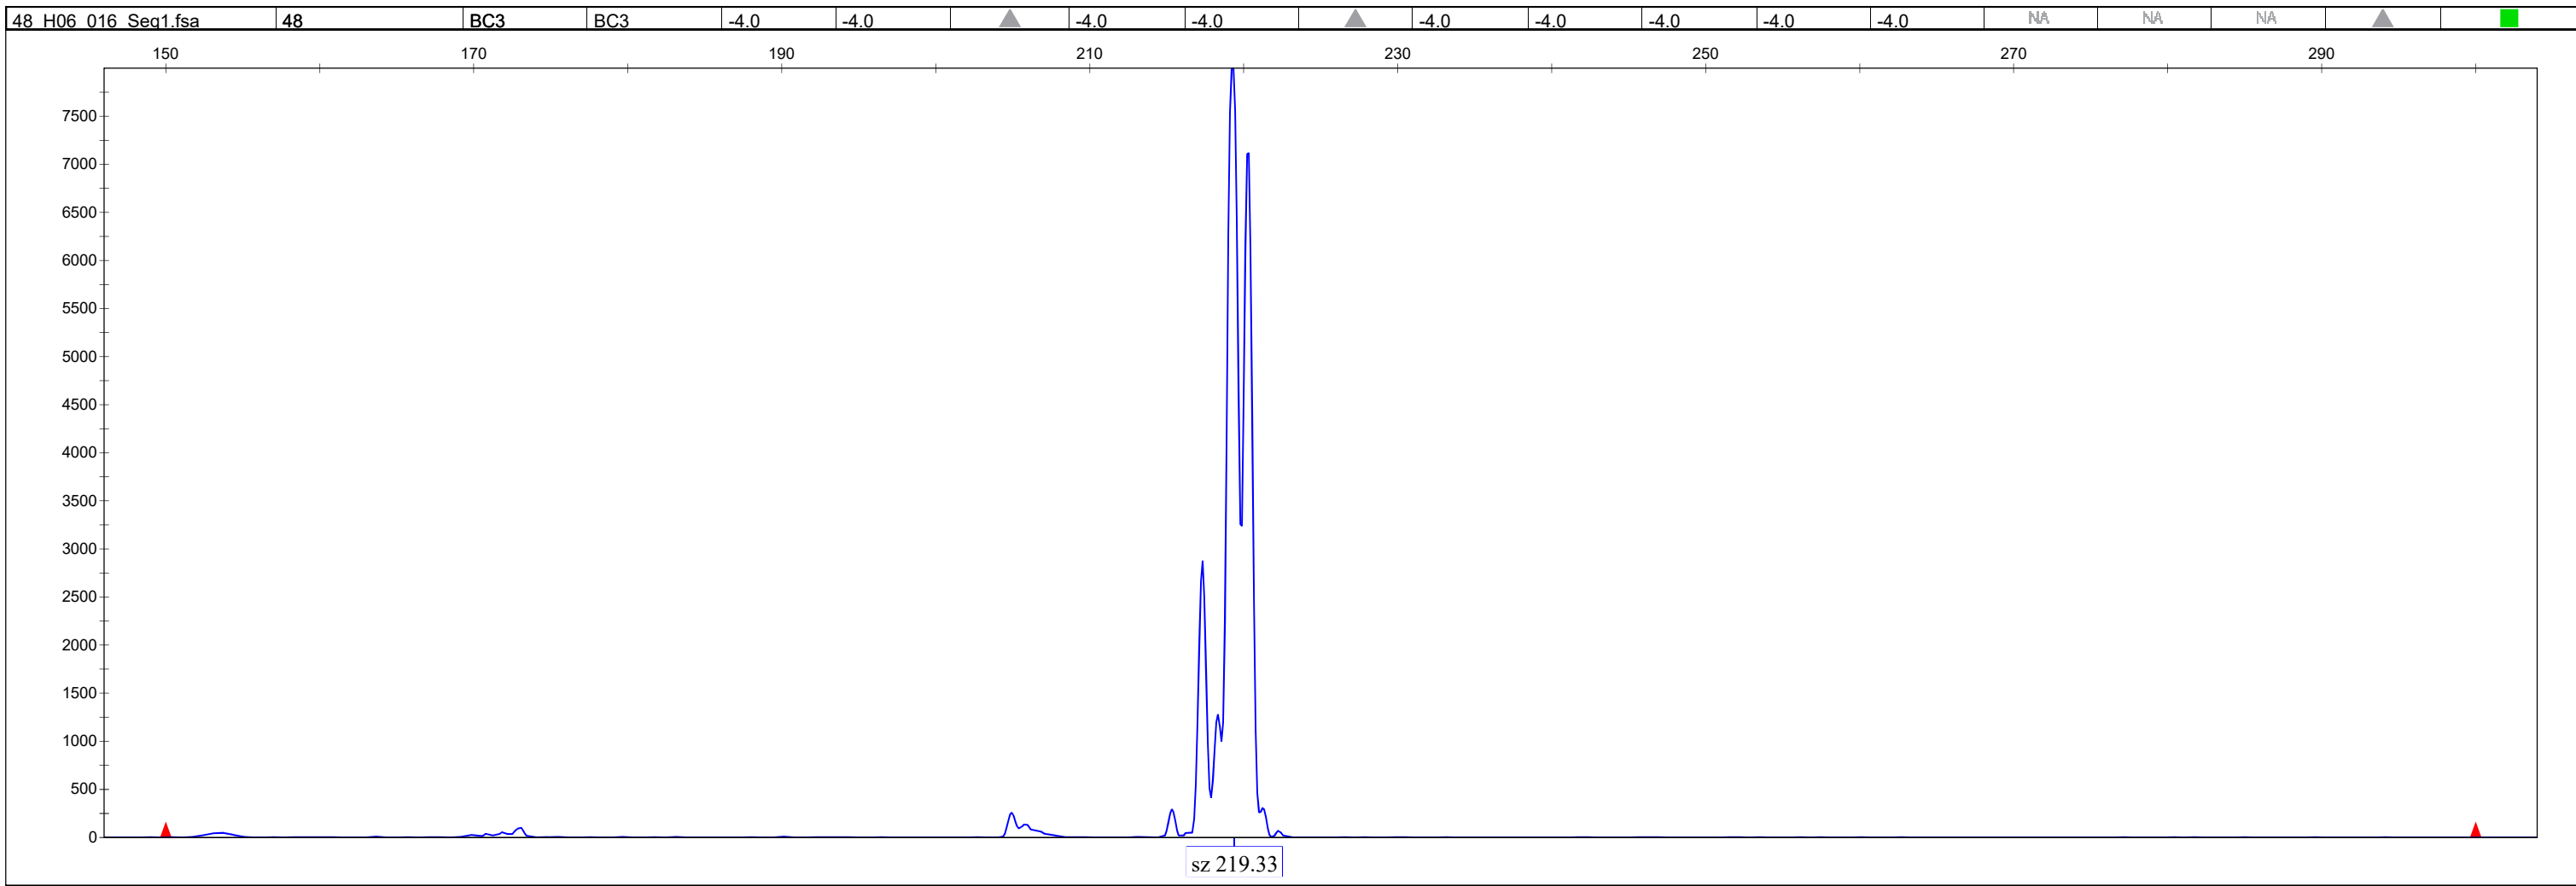

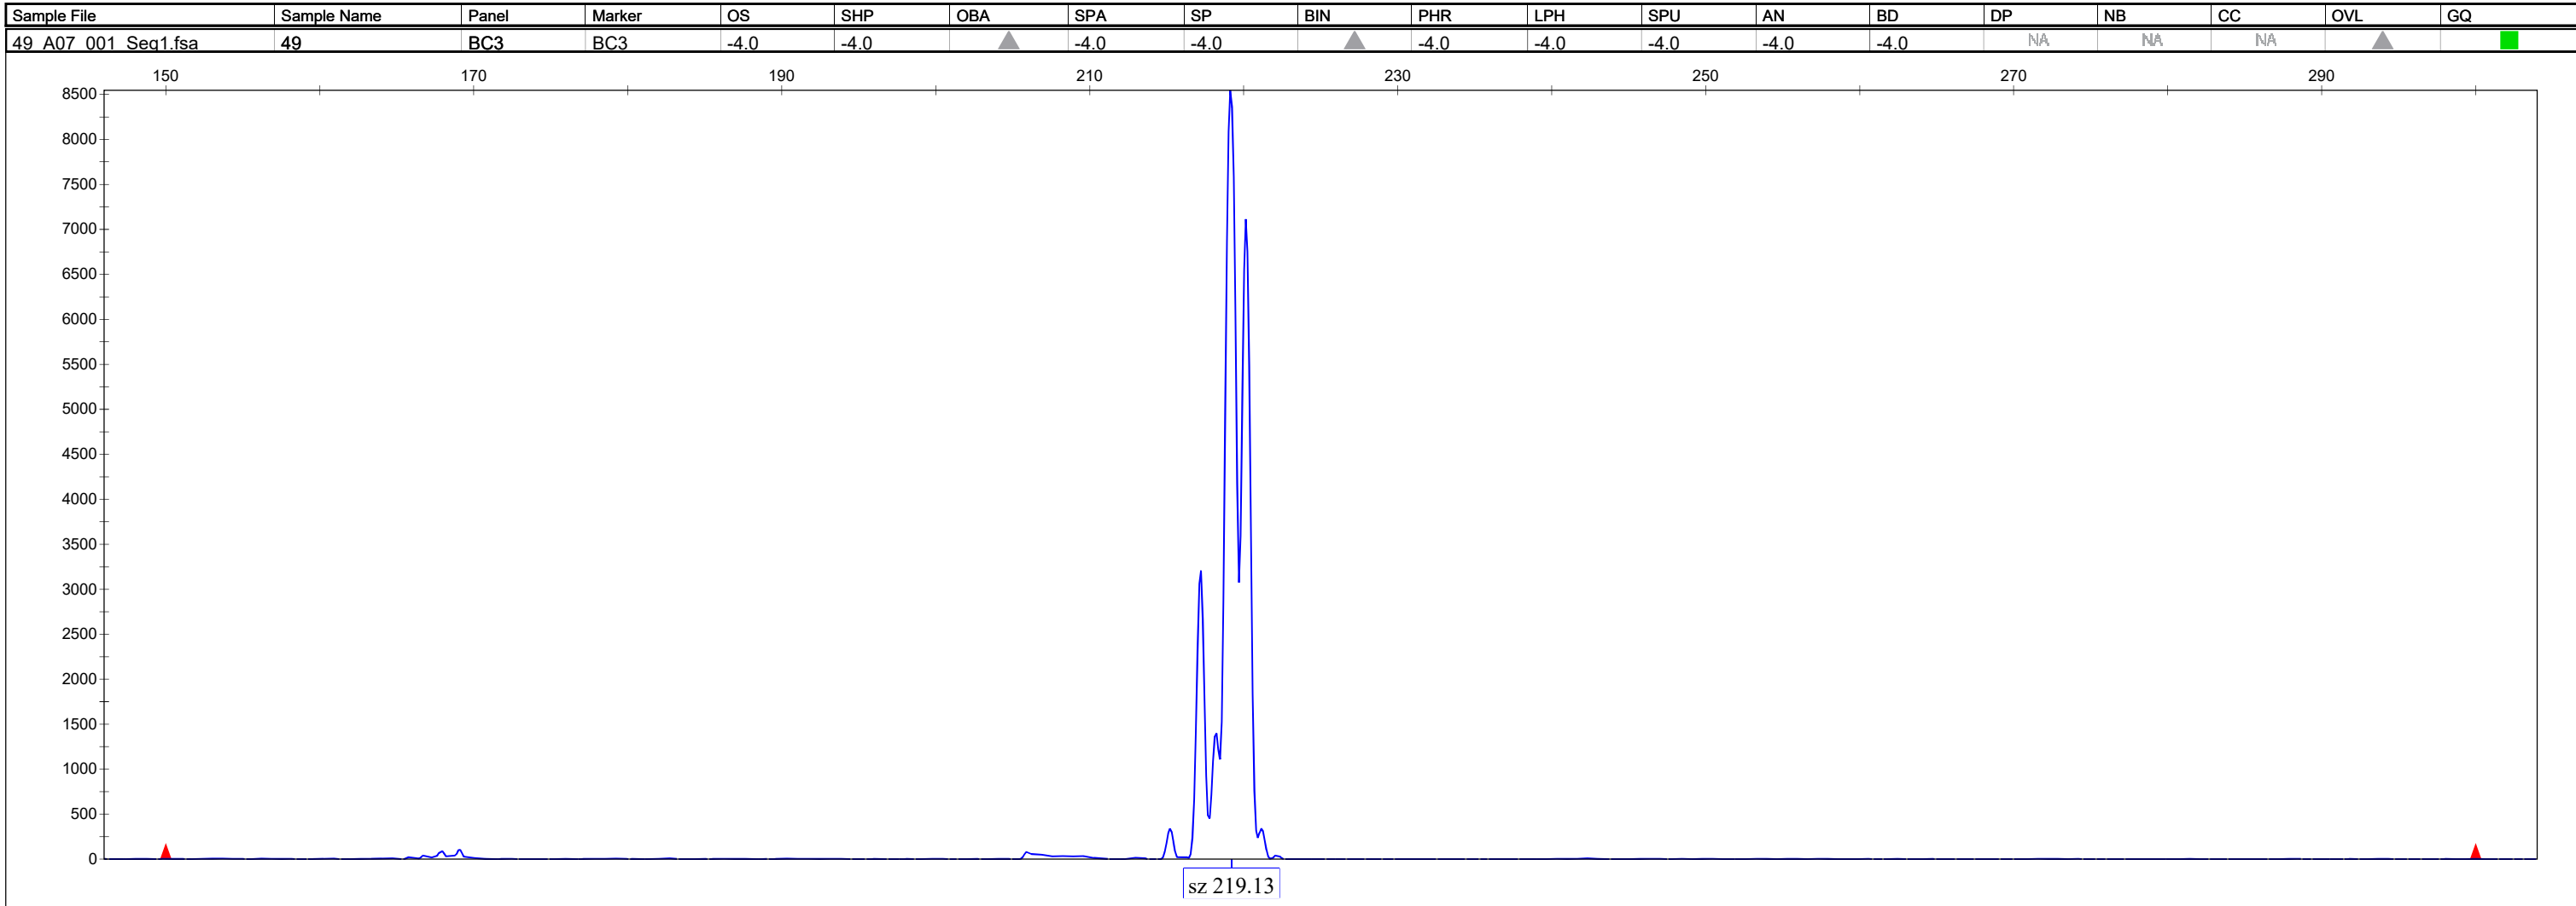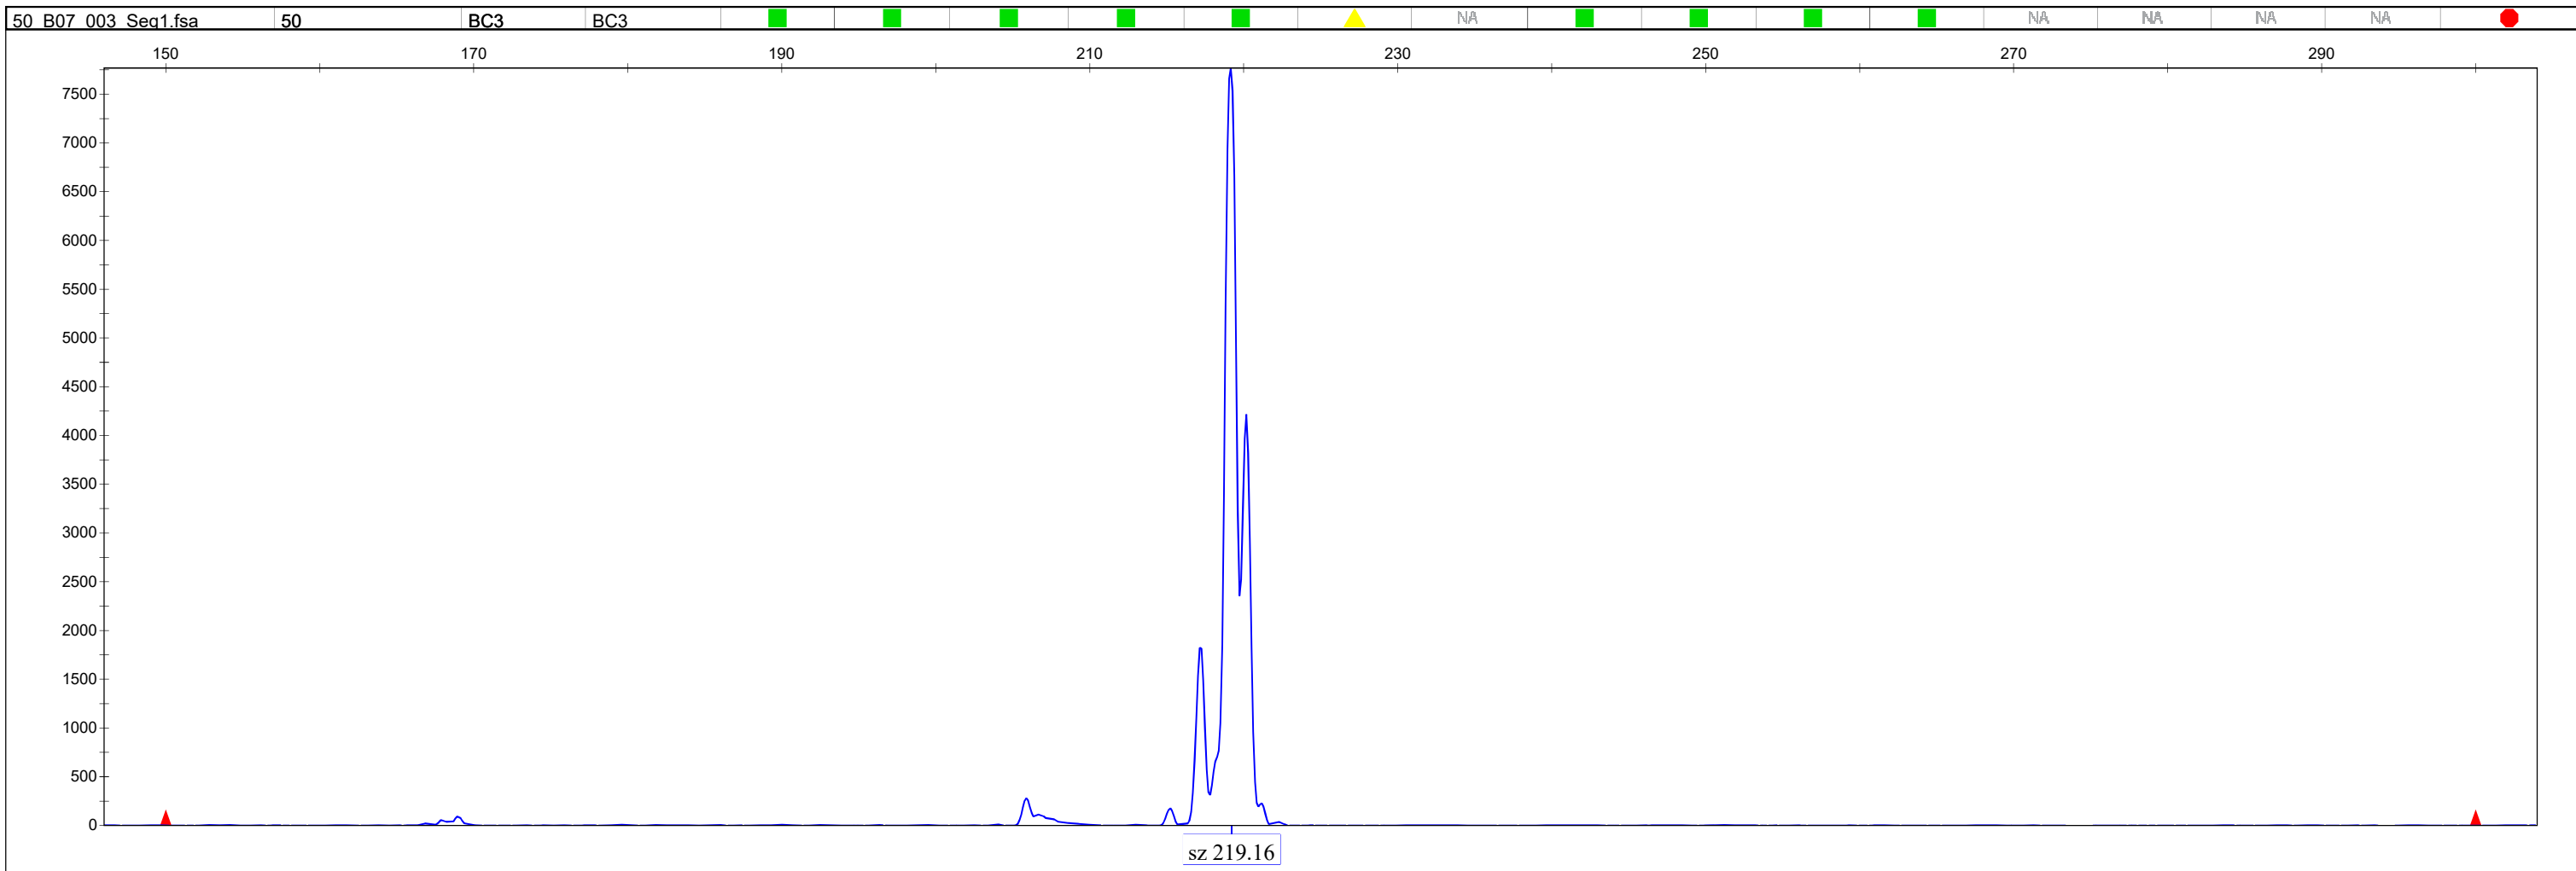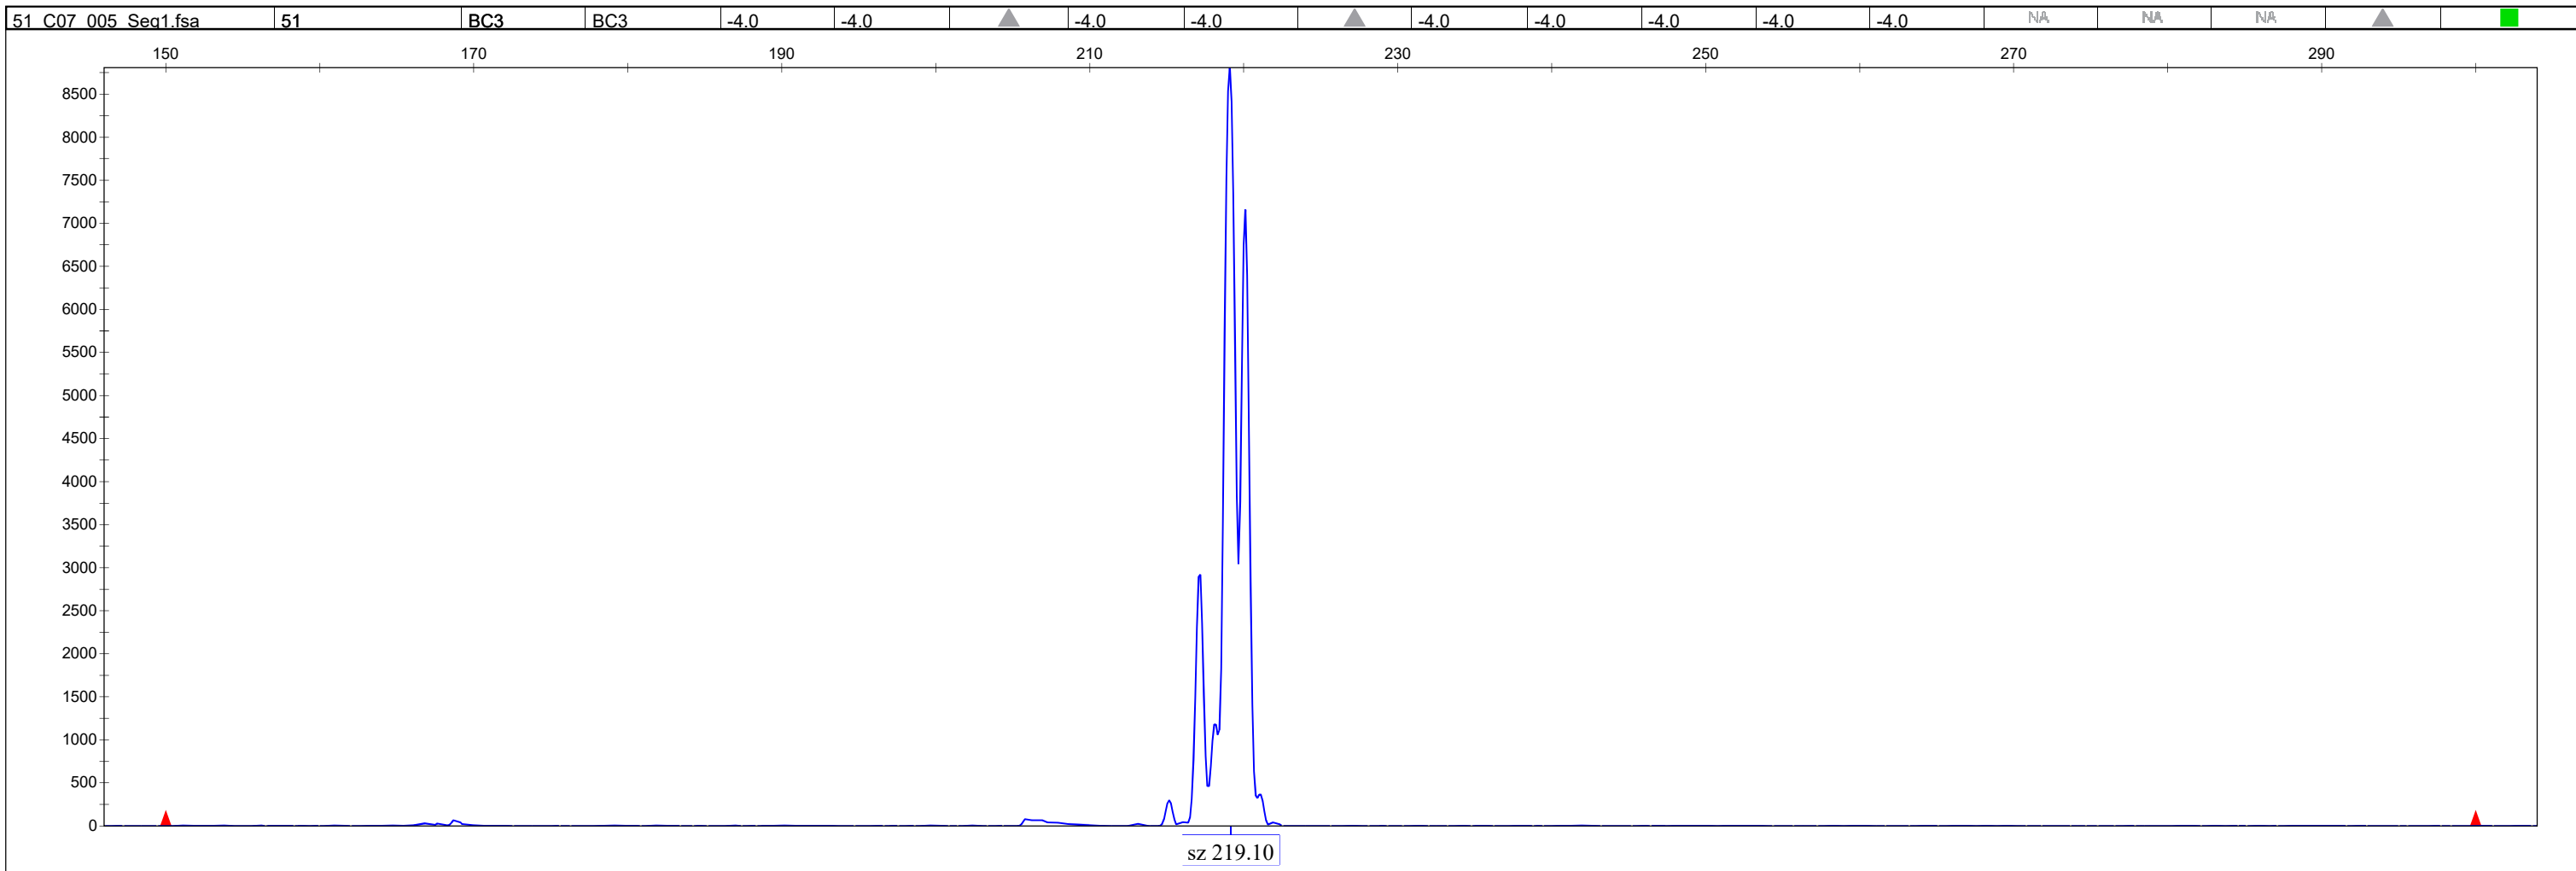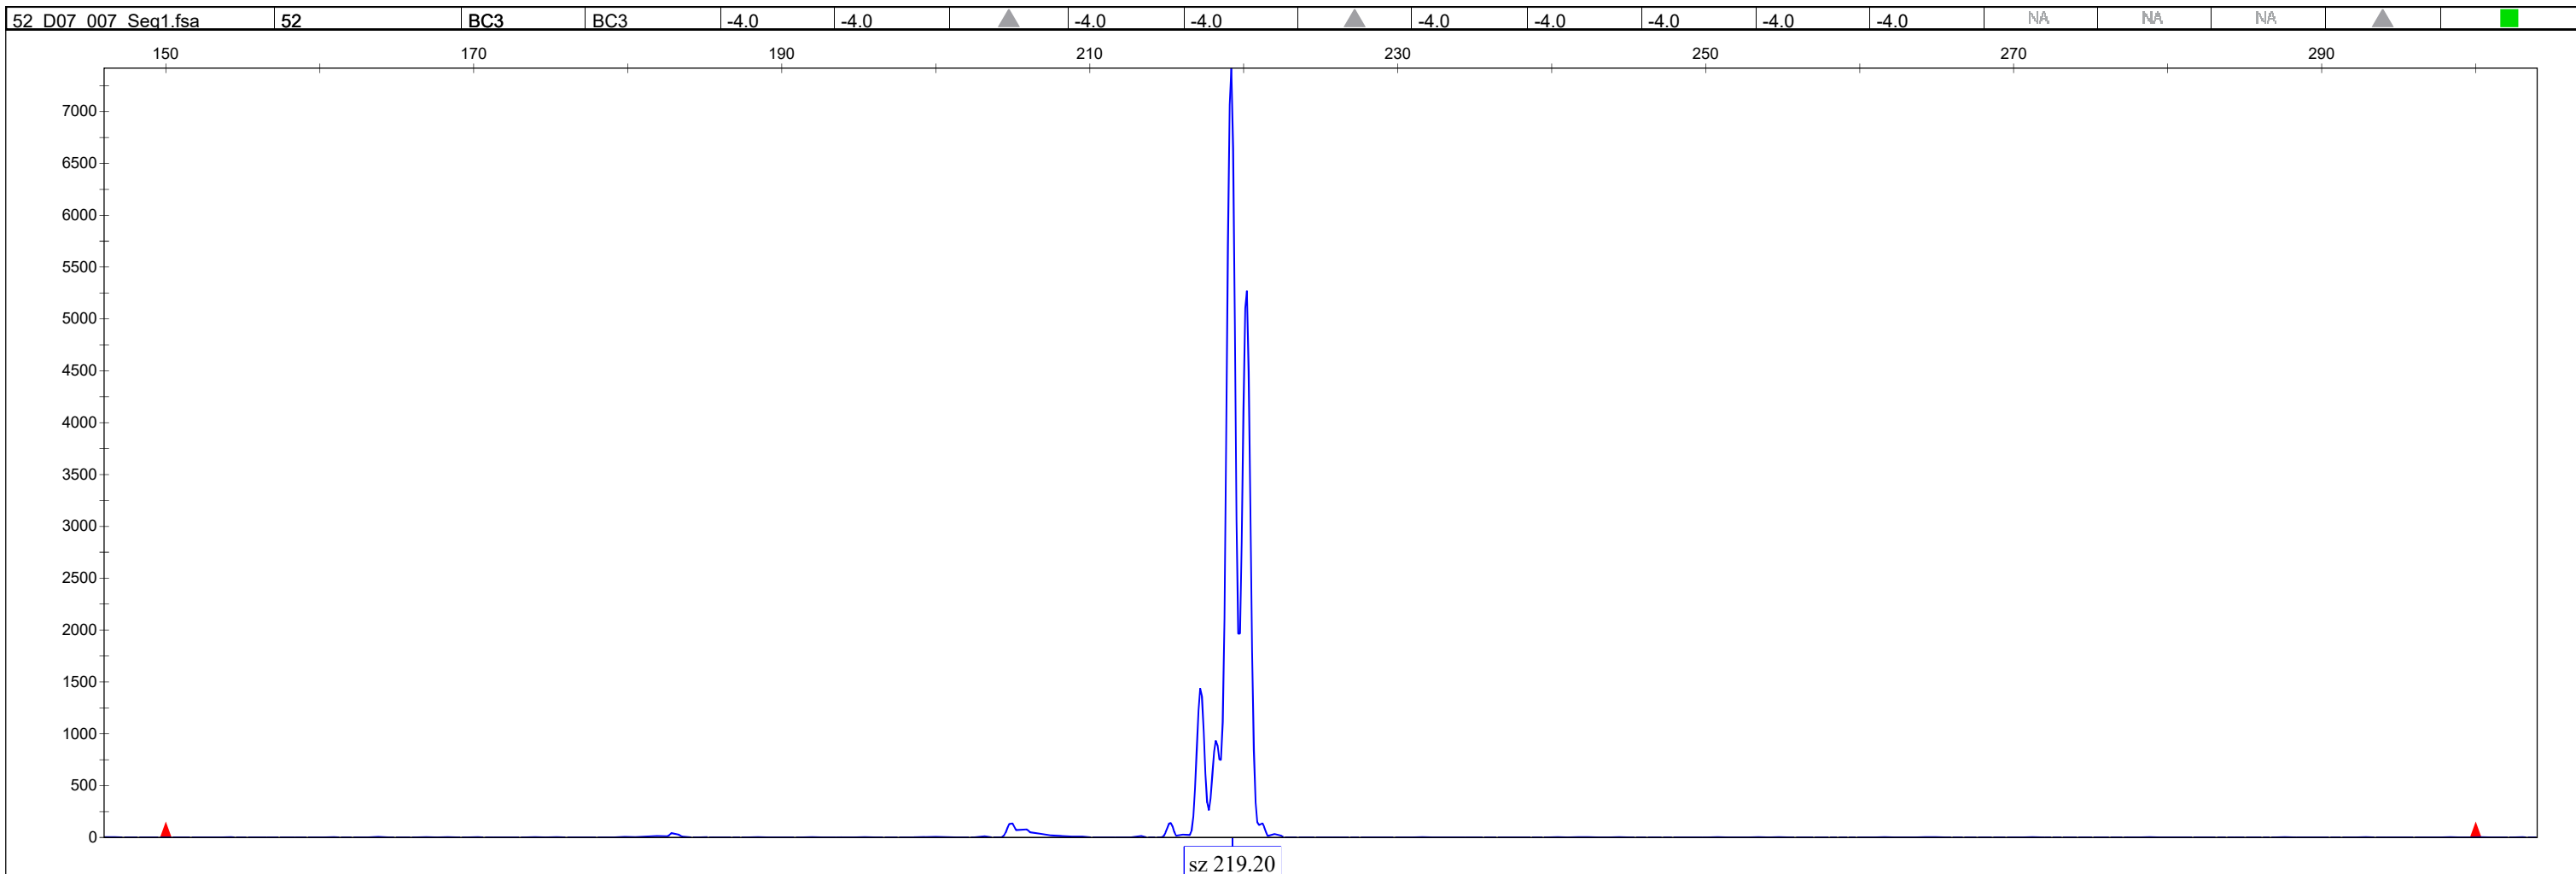

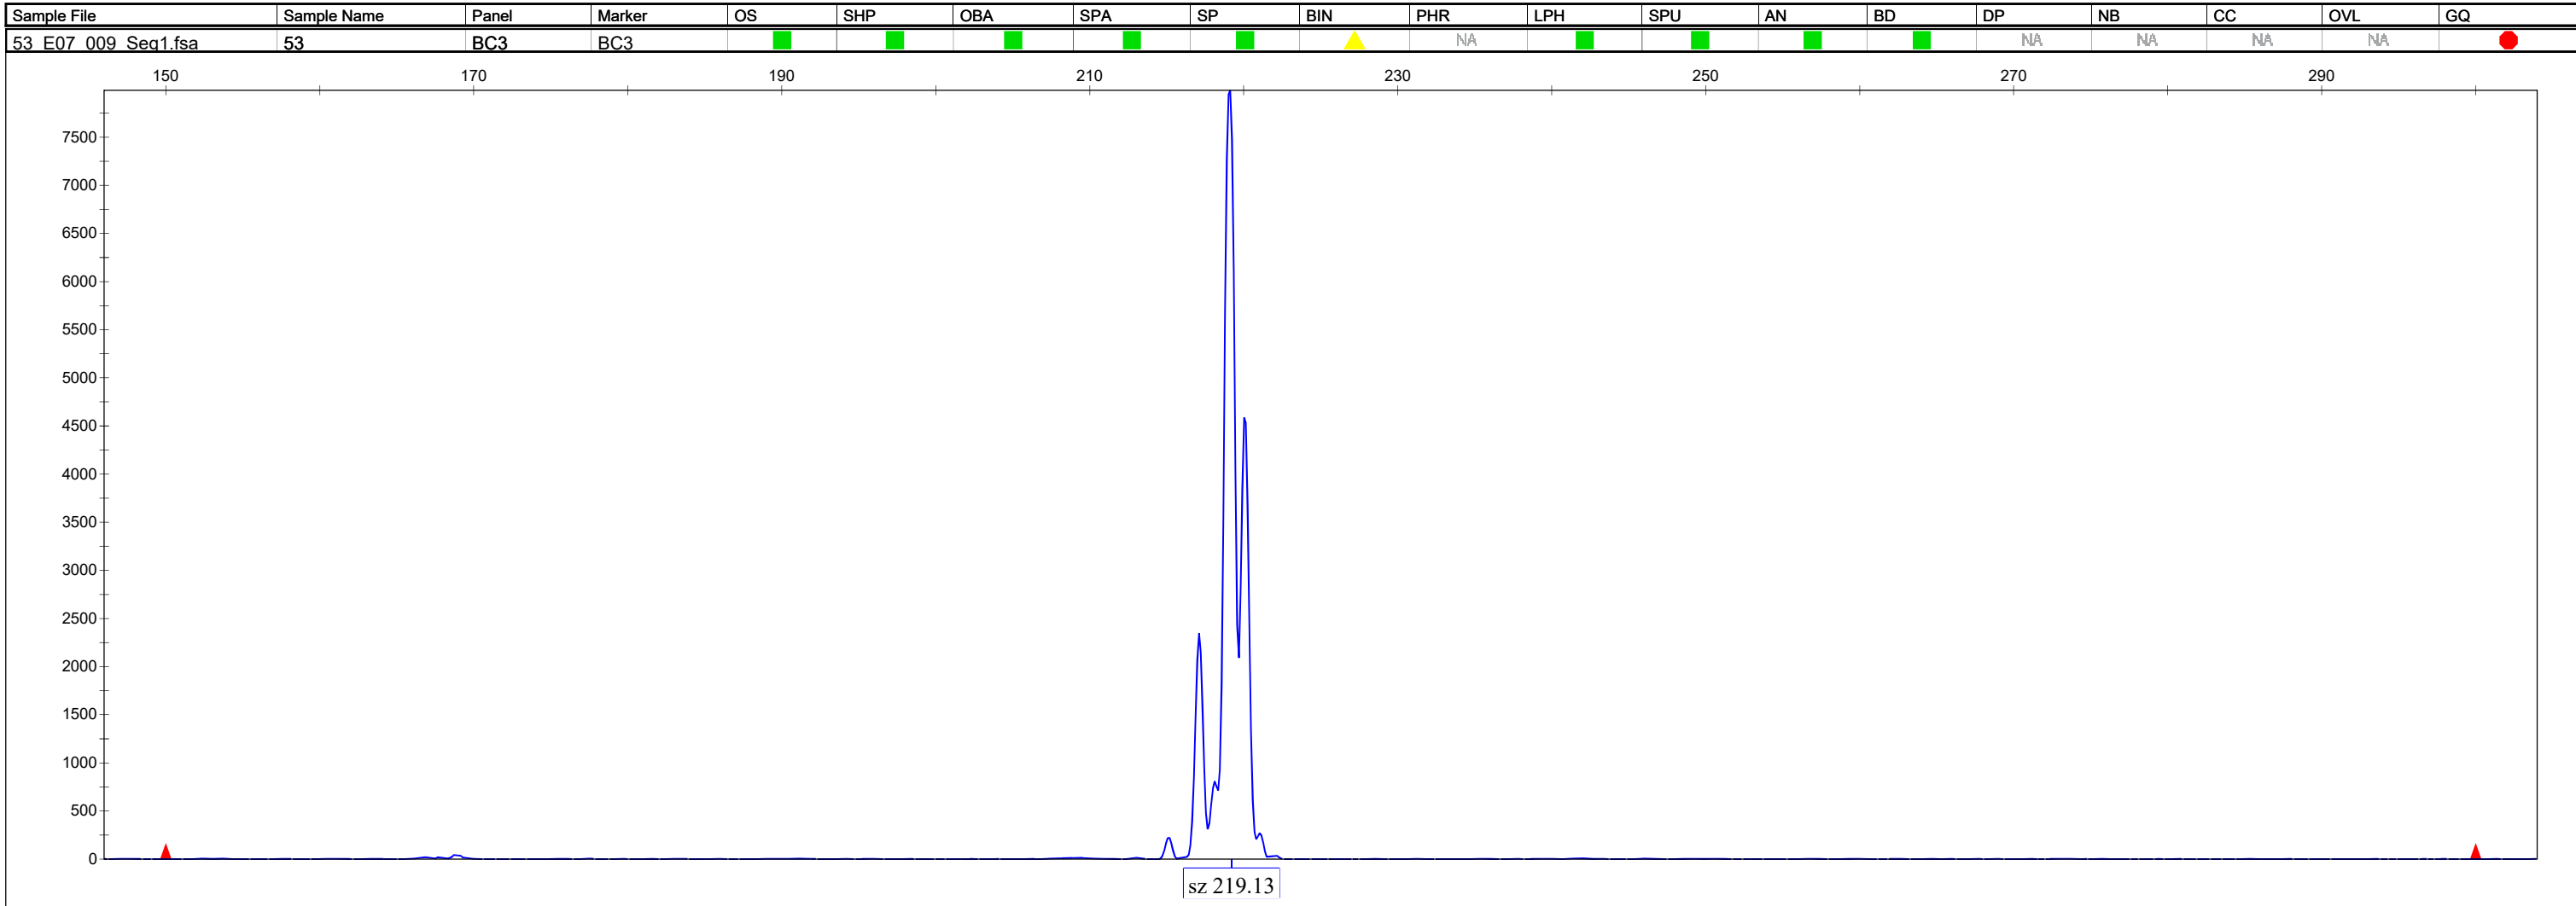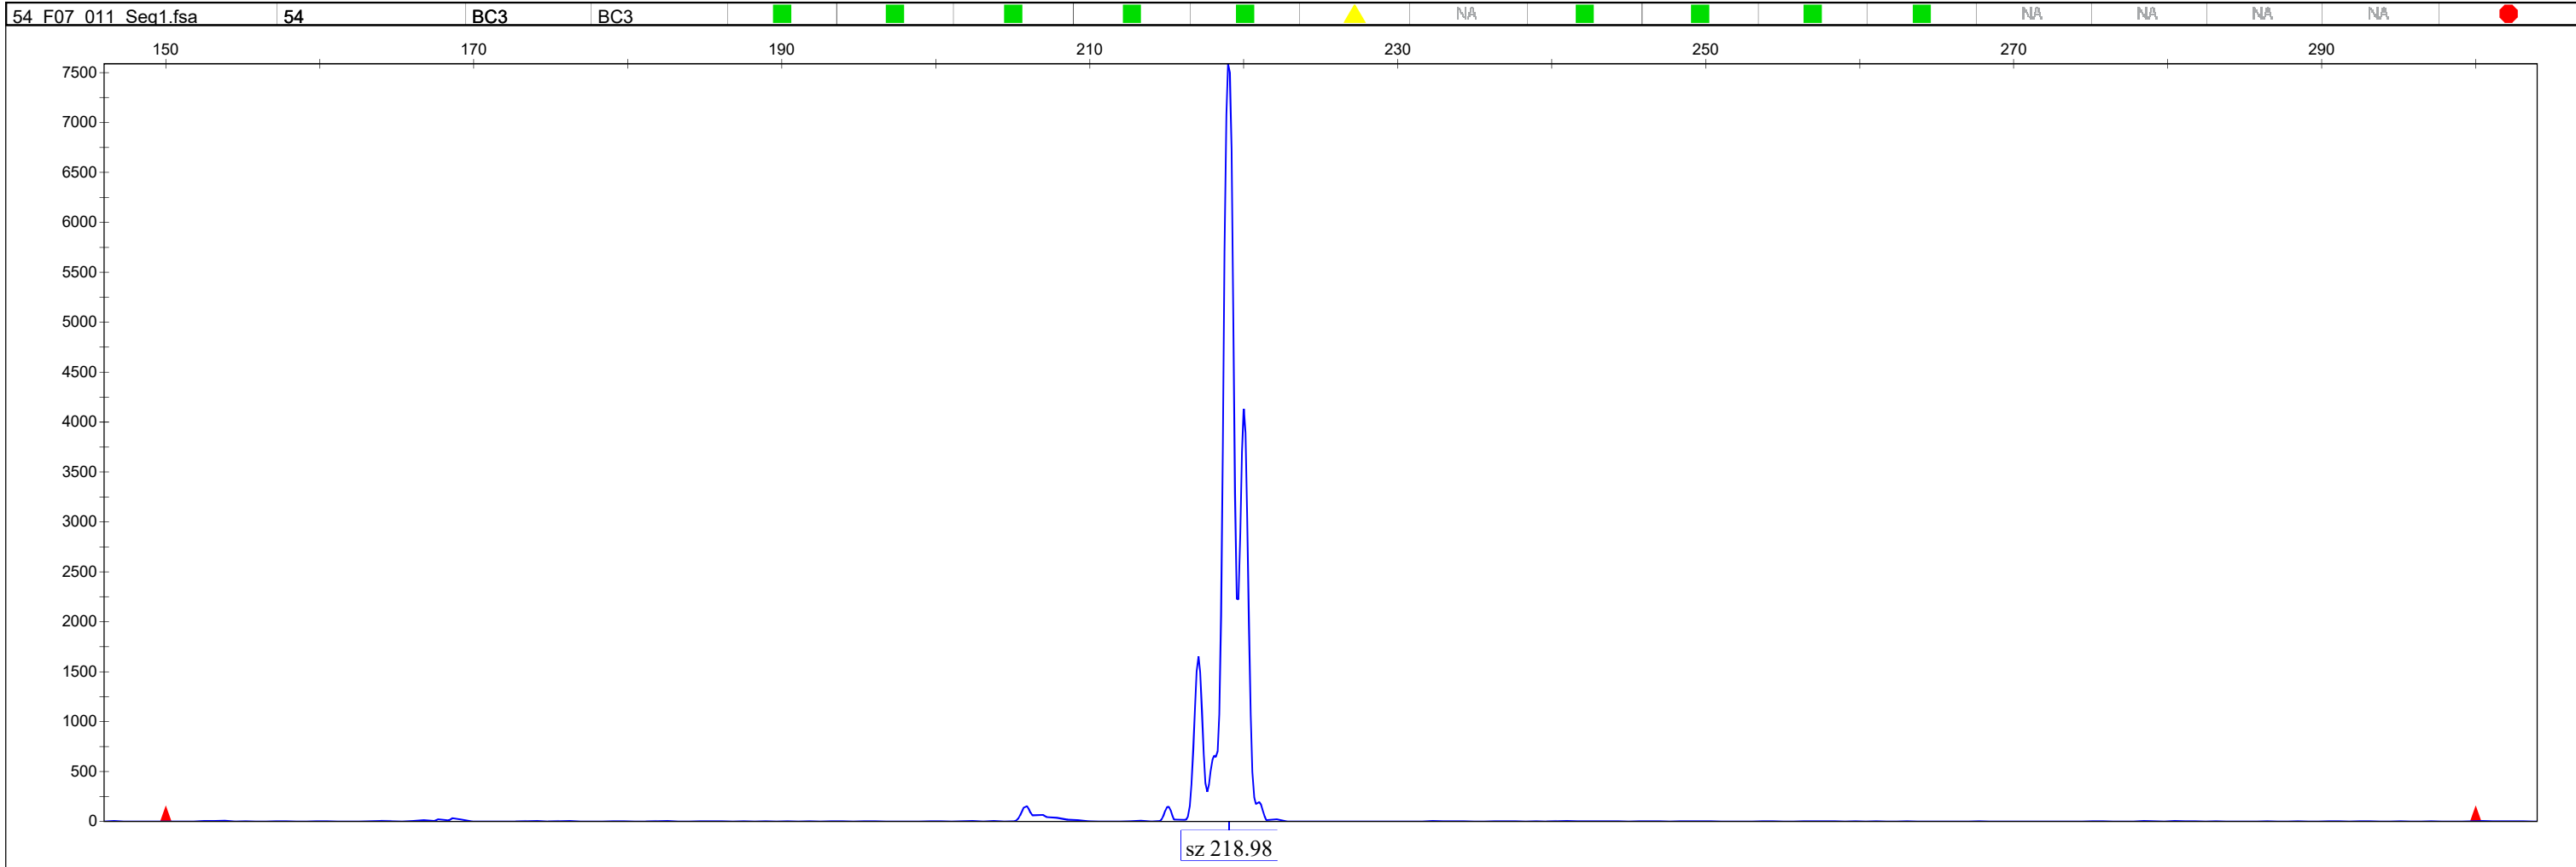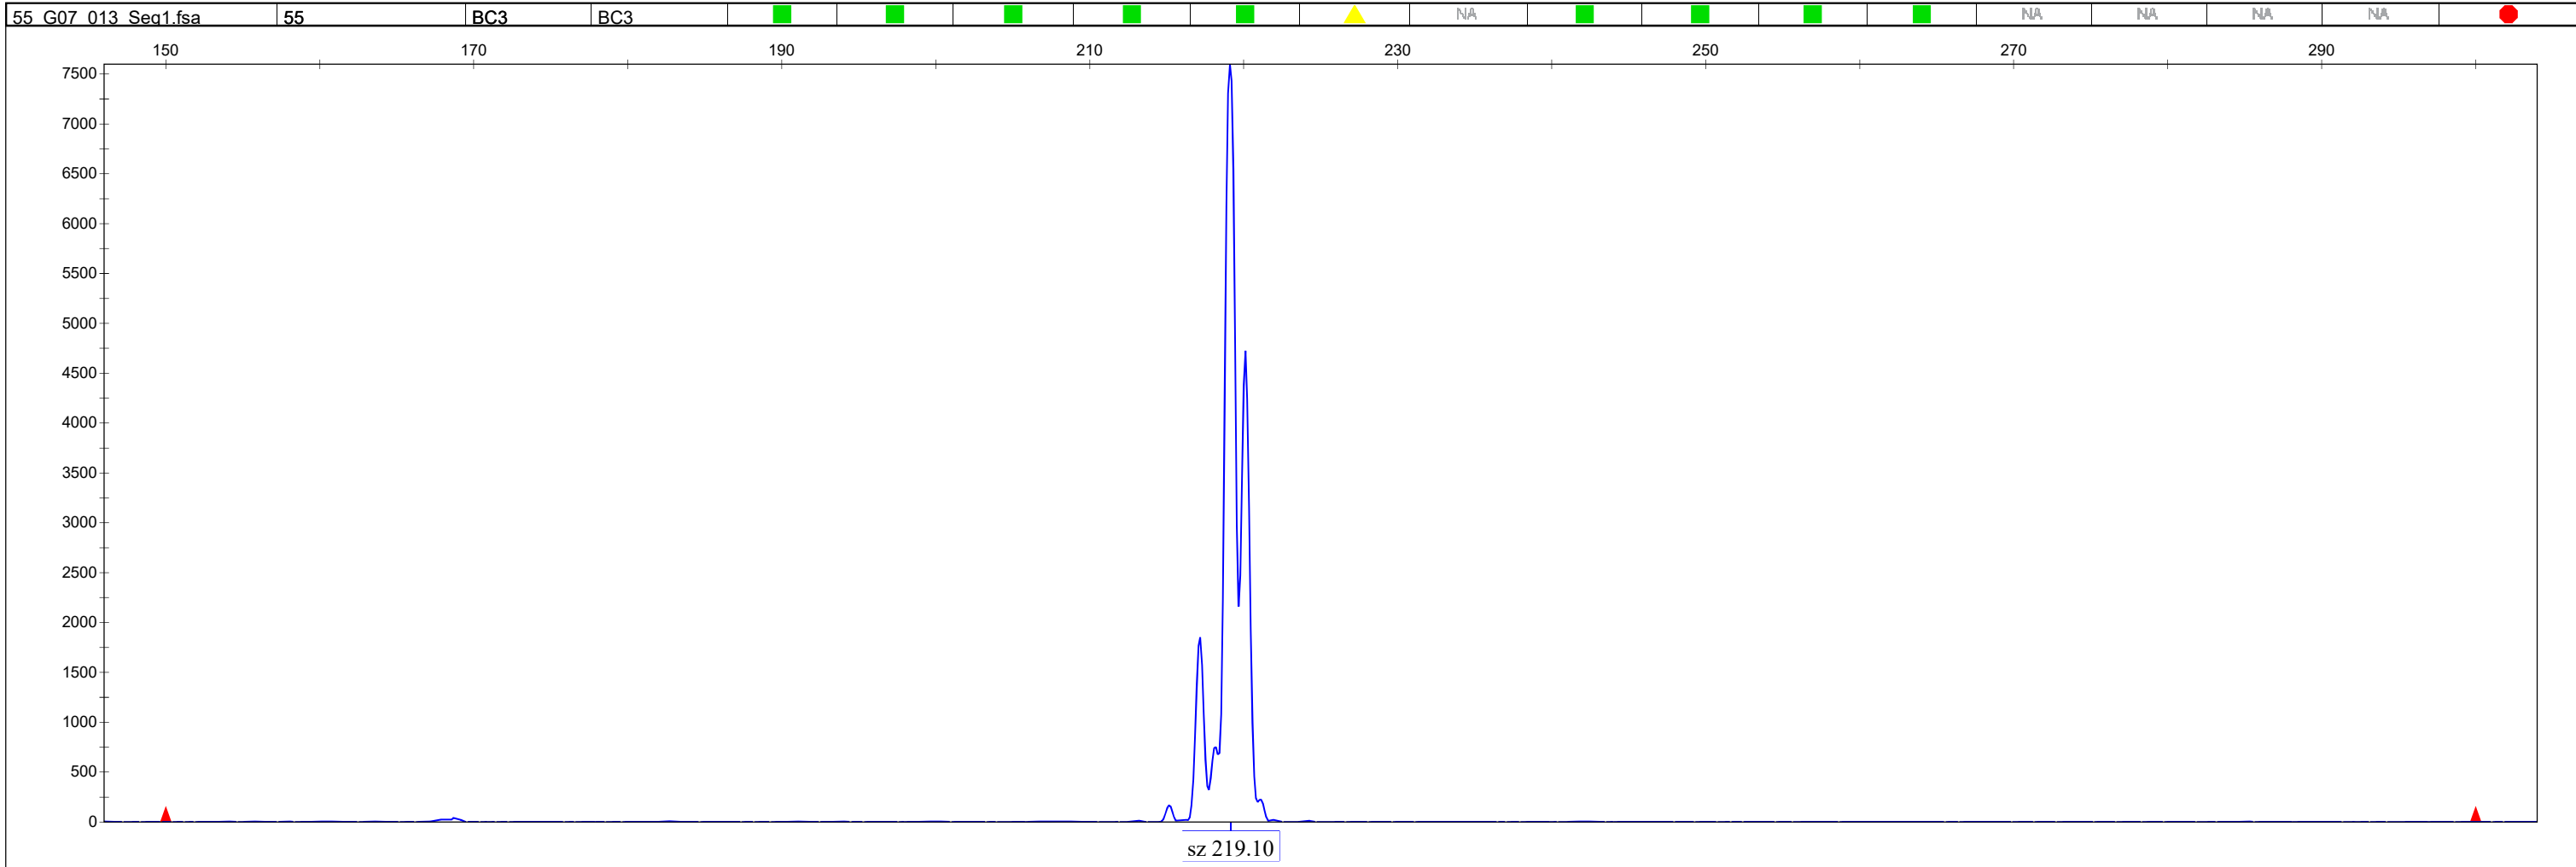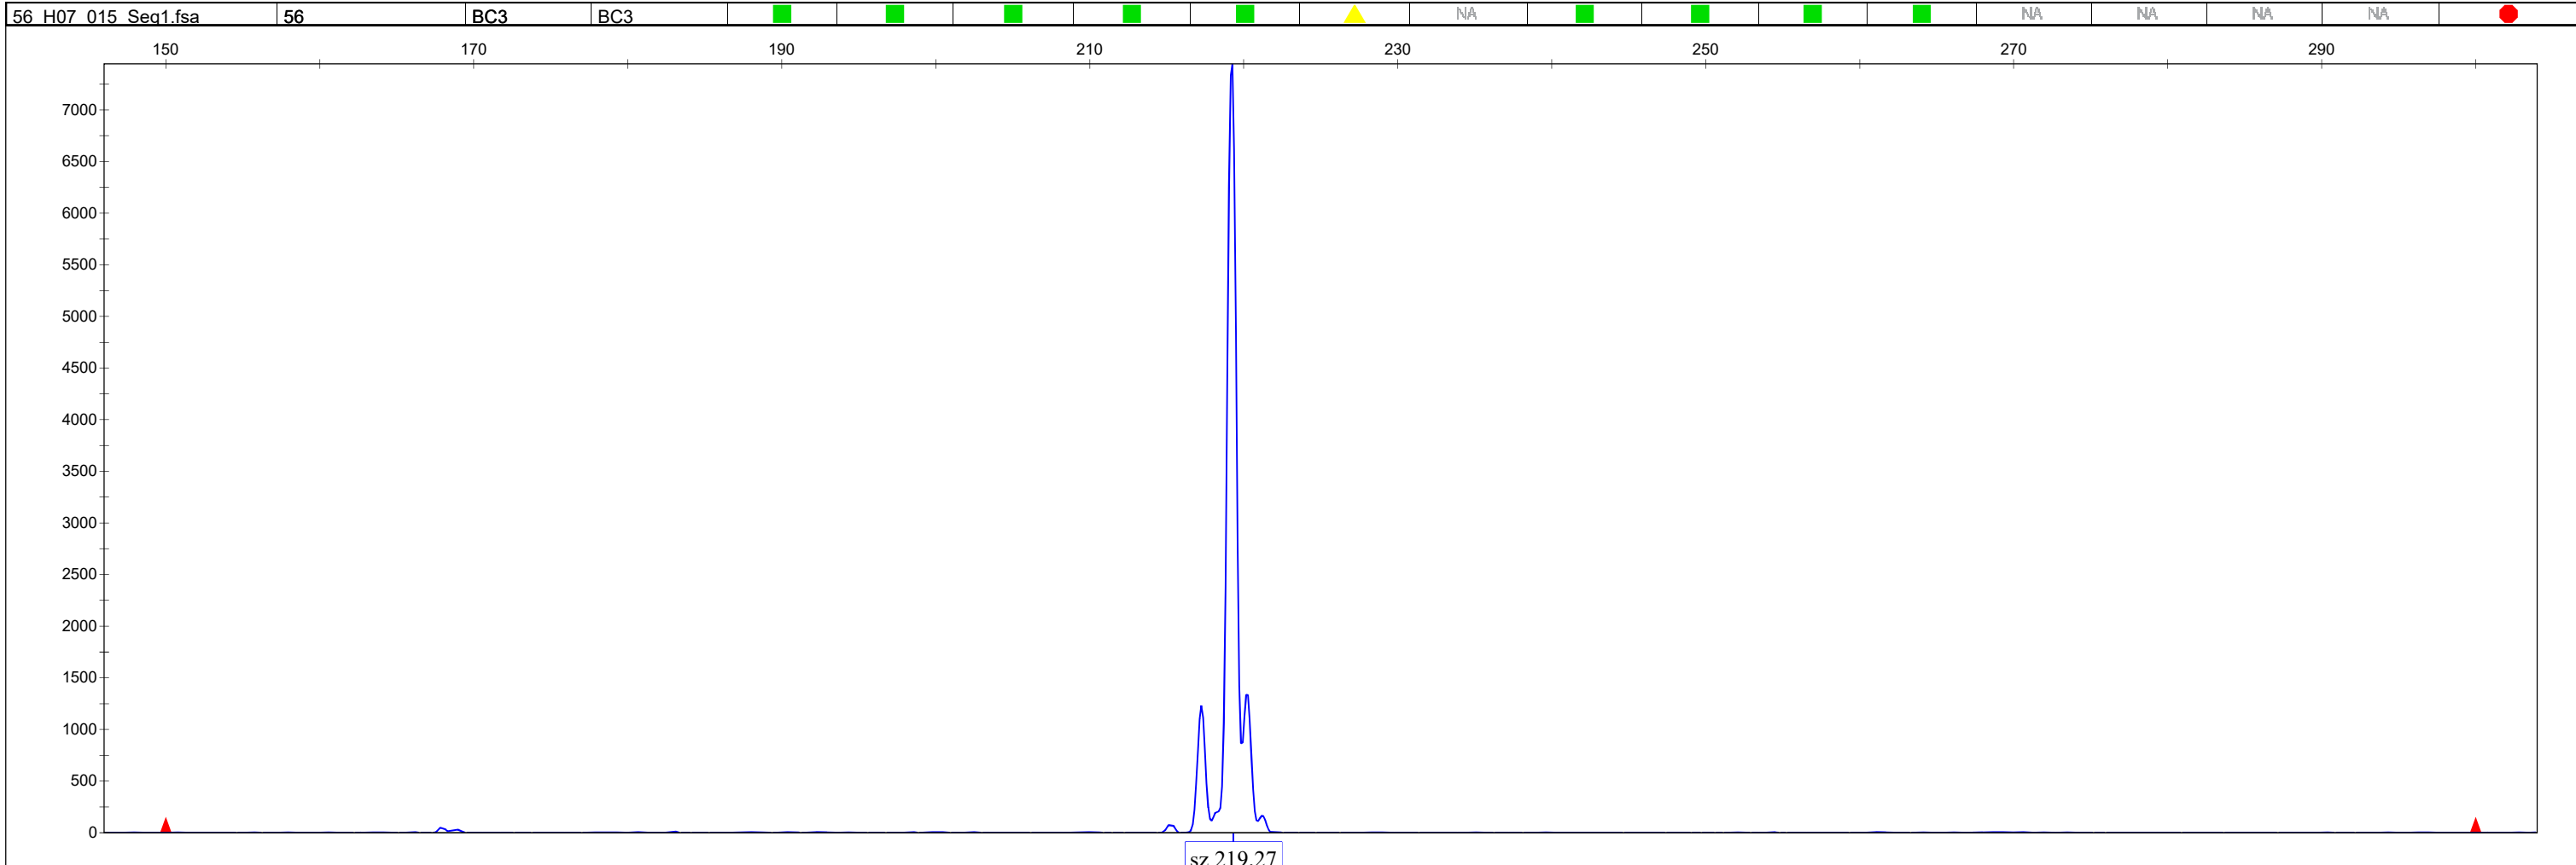

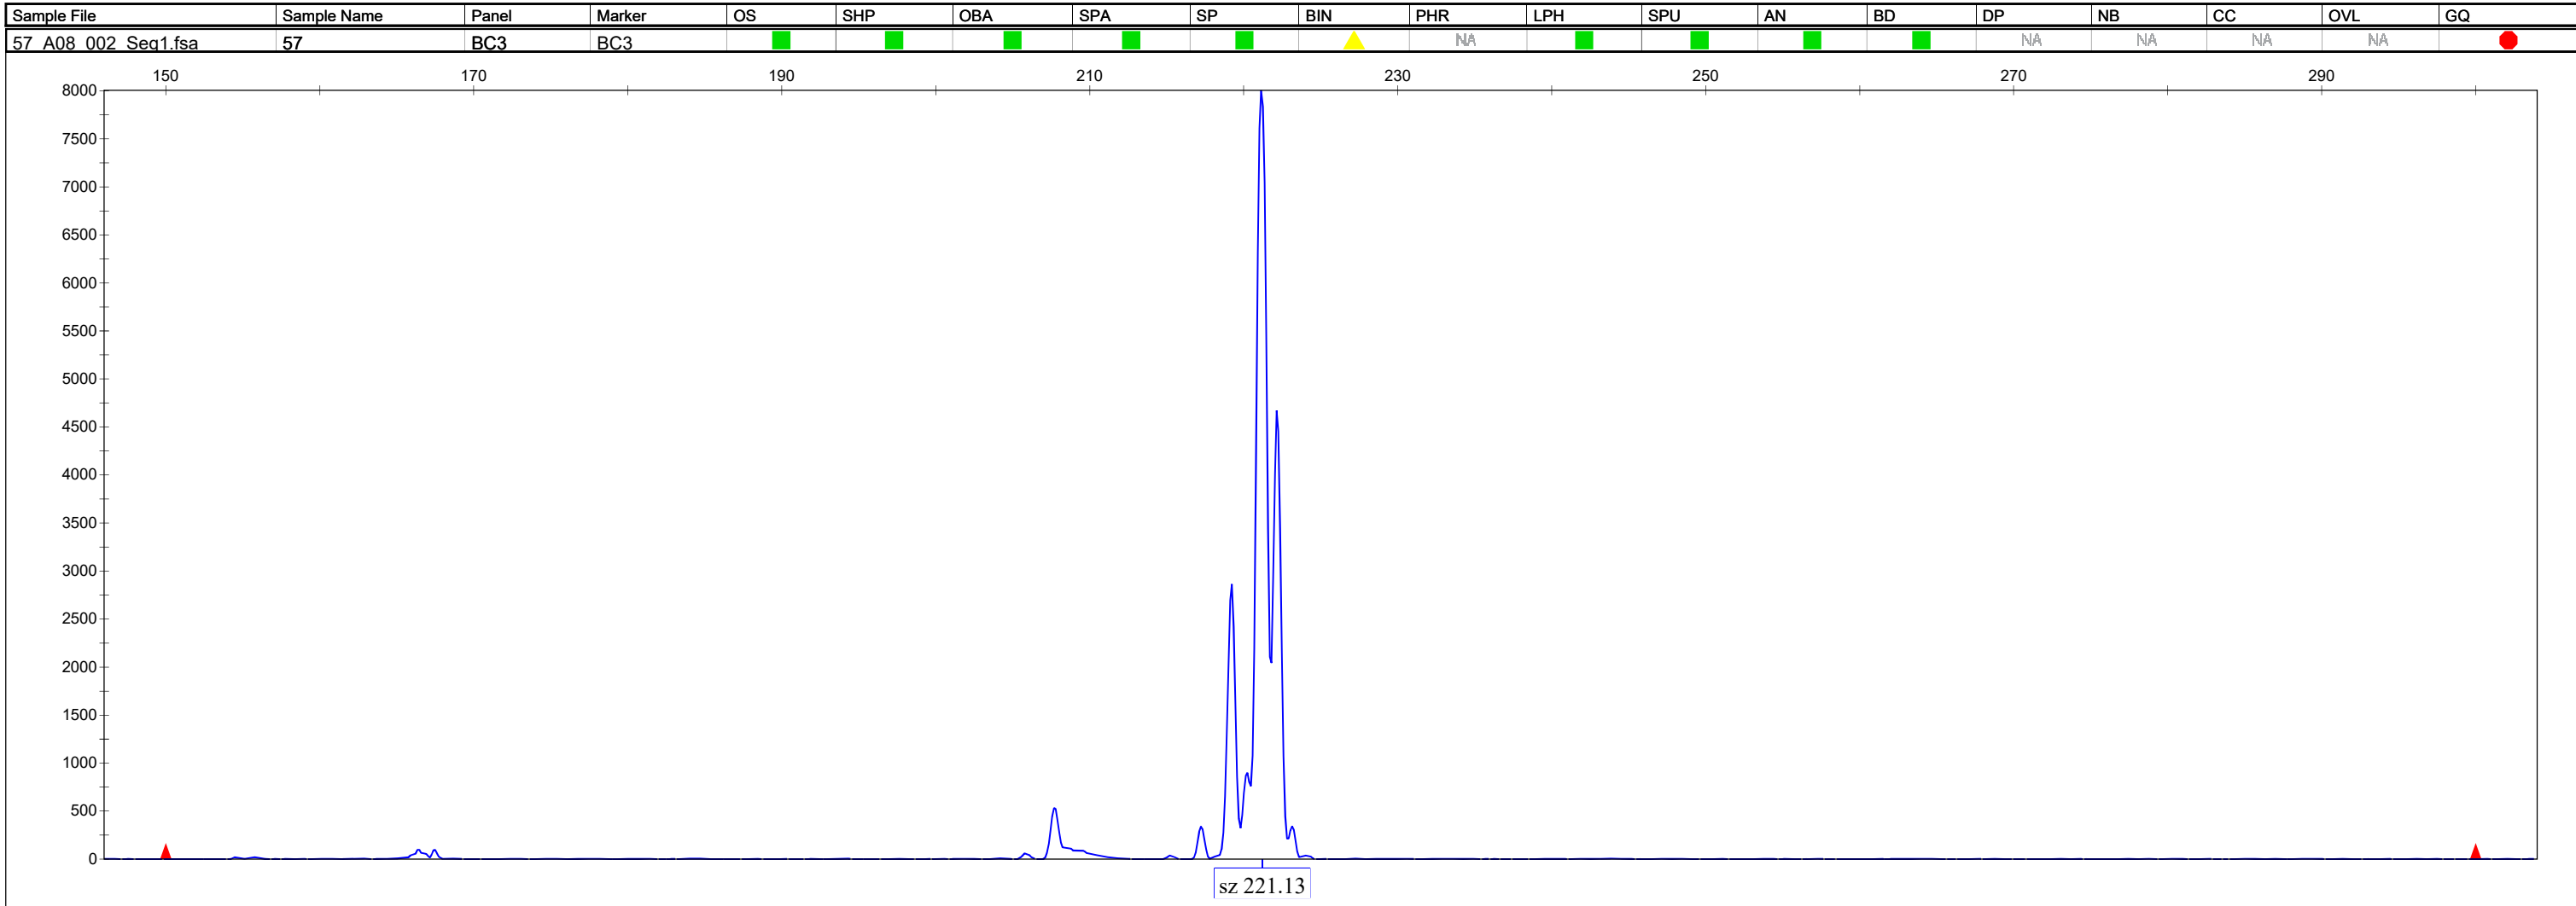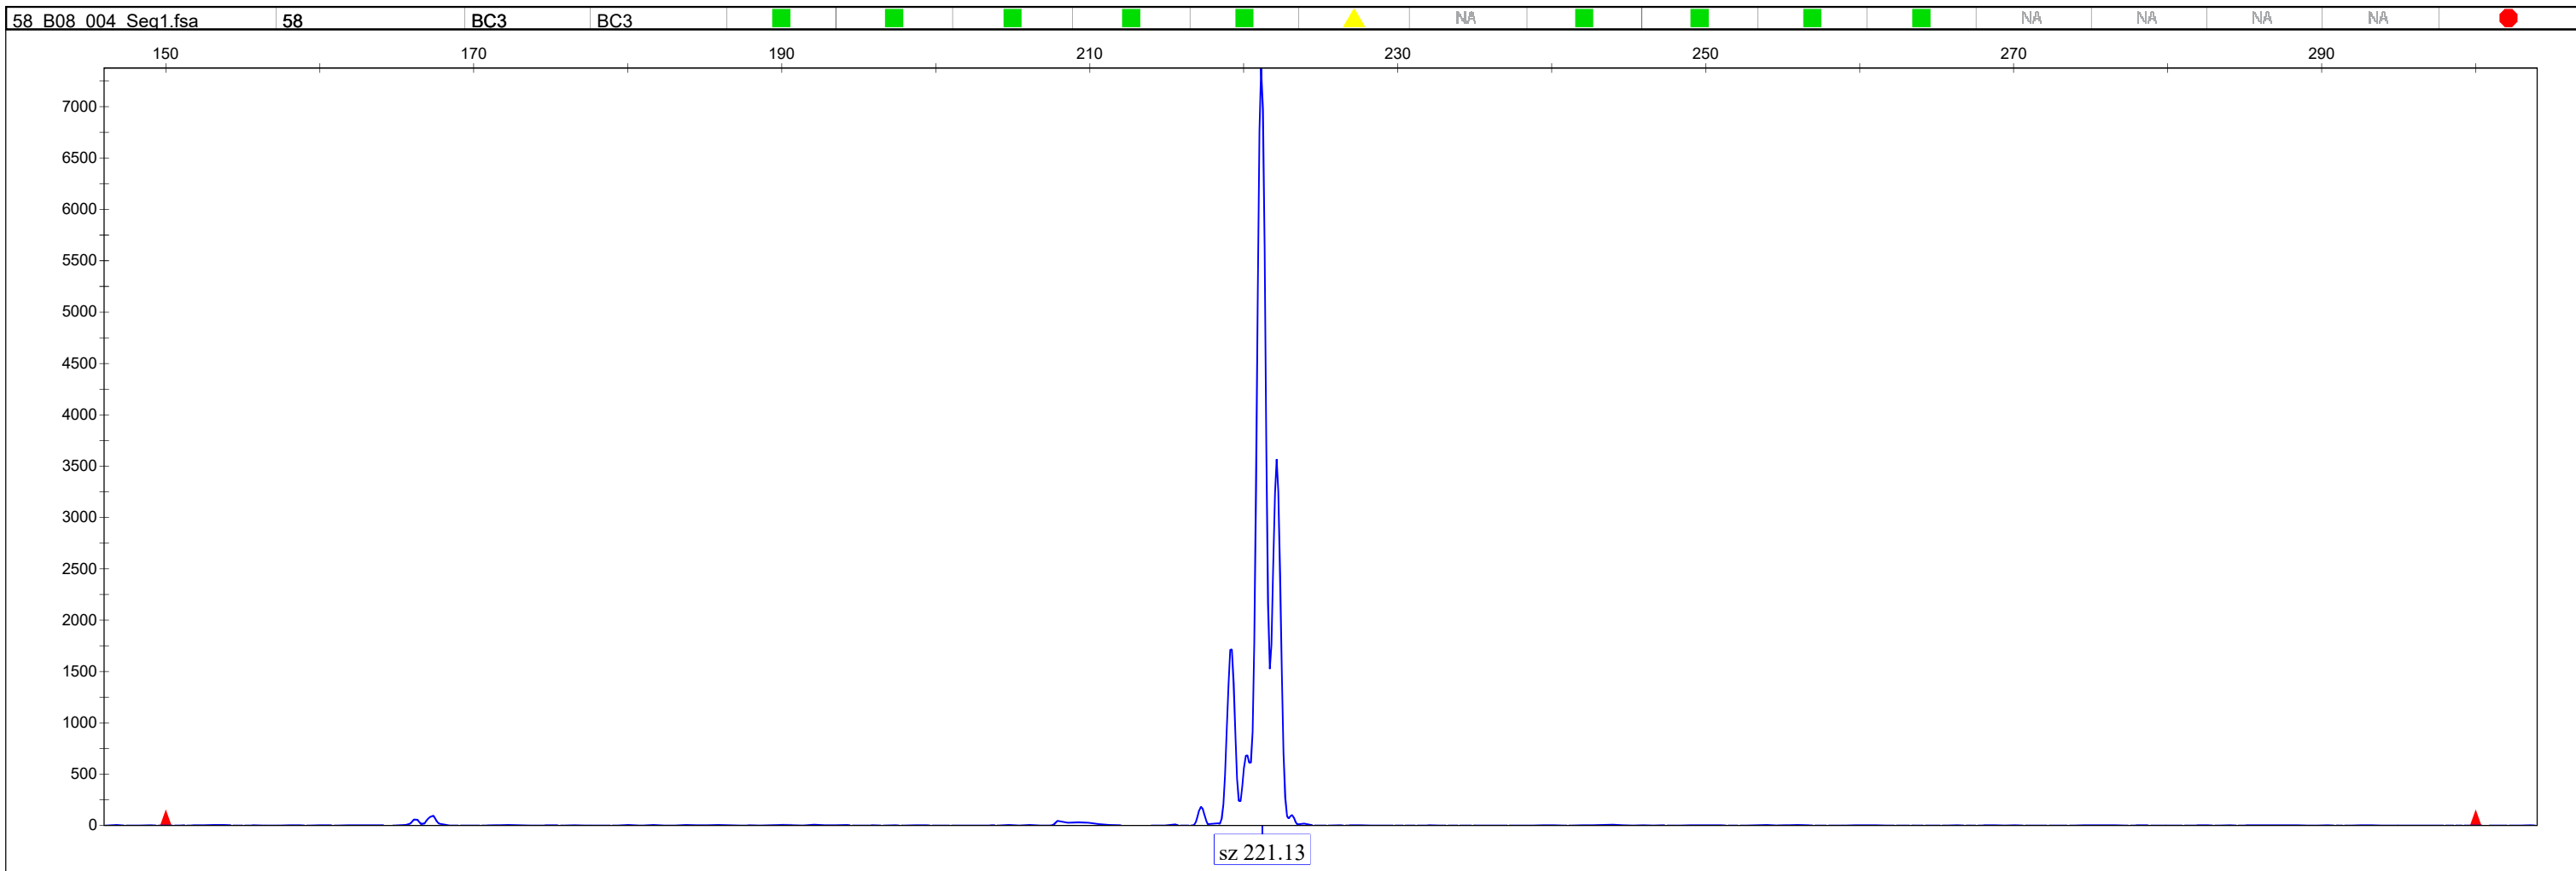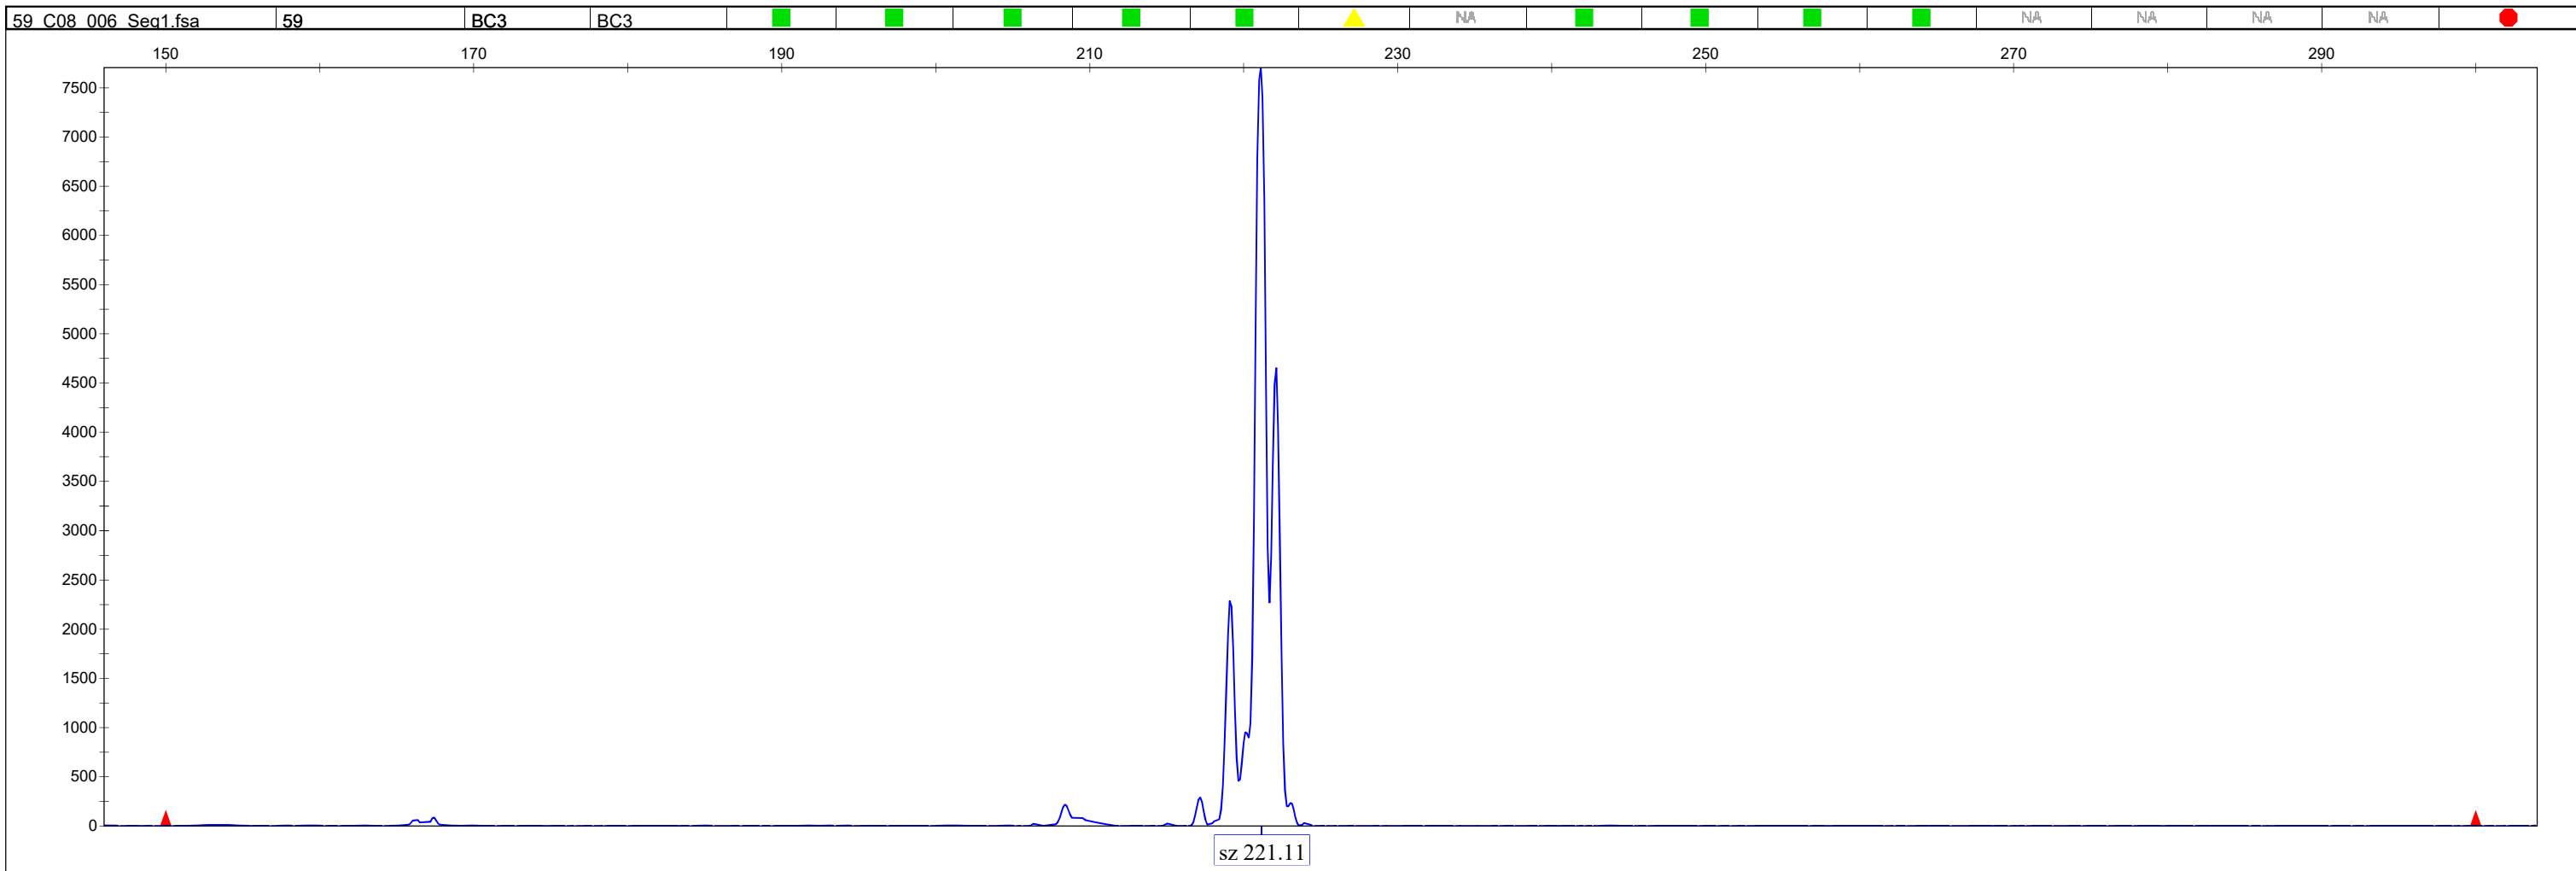

Supplement: s1 [file s1]
