# Supplementary material for: Molecular Biological Methods to Assess Different Botrytis cinerea Strains on Grapes
Source: MDPI journal article supplement (doi:10.3390/microbiolres15020037), 2024-04-19
Supplement: s1 [file s1]

Supplementary material for the agarose gel electrophoresis:

All strains were analyzed using the same 50bp ladder.

The sample setup was: Runtime: 2 h45 min, Voltage: 90 mV

At the end of the document a table containing the band sizes analysed by ImageJ ist given.

GeneRuler 50 bp DNA Ladder

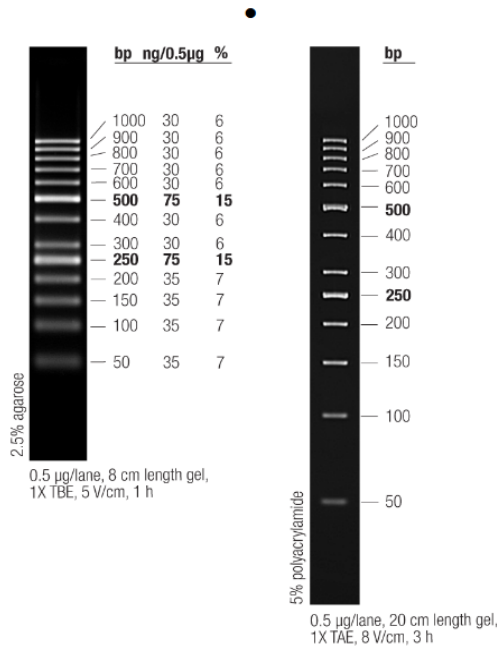

Figure S3: All strains were analysed in order, followed by a negative control (example given):

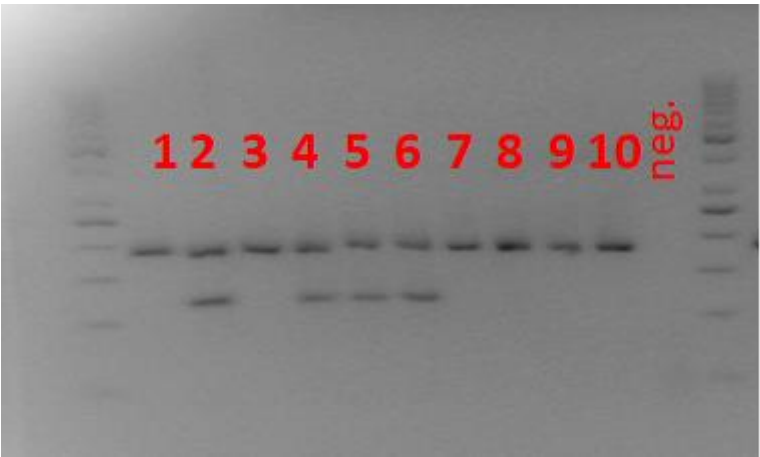

Figure S4: Example of the agarose gel. All strains tested are in order. Strain 1 followed by strain 2, 3,... in that order. At the end a negative control was done.

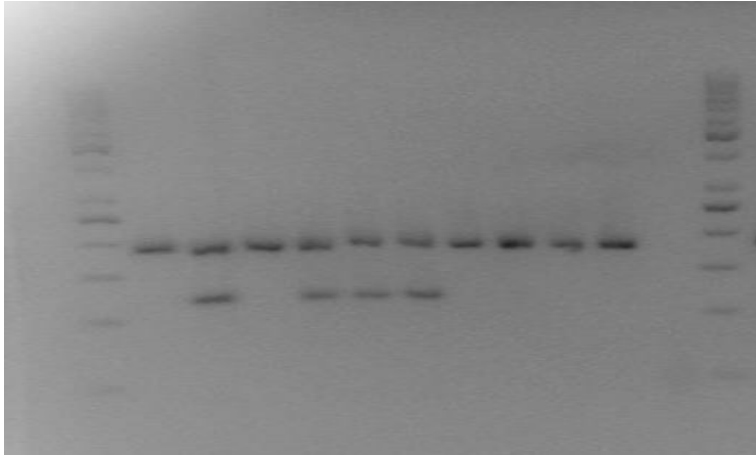

**Figure S5:** Strain 1-10; Primer Bc7, Bc10.

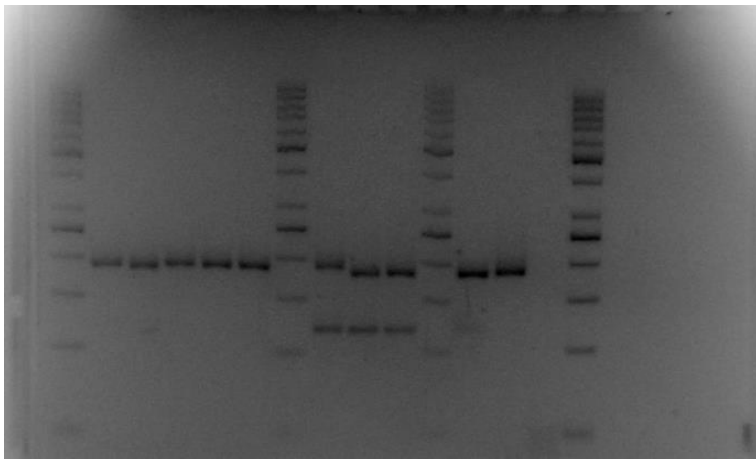

**Figure S6:** Strain 11-20; Primer Bc7, Bc10

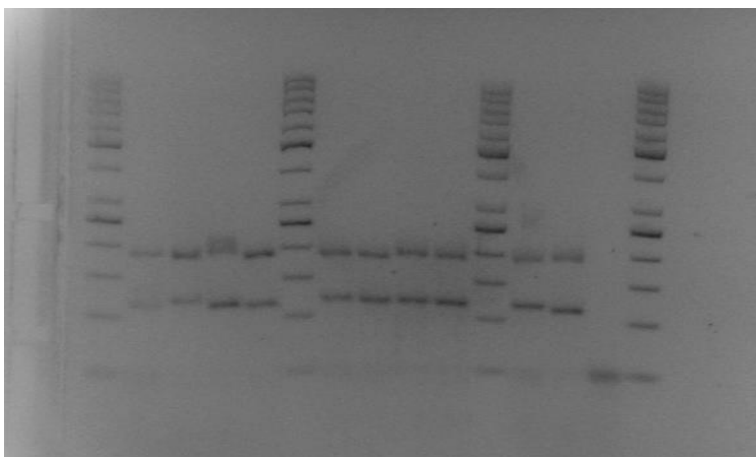

**Figure S7:** Strain 21-30; Primer Bc7, Bc10

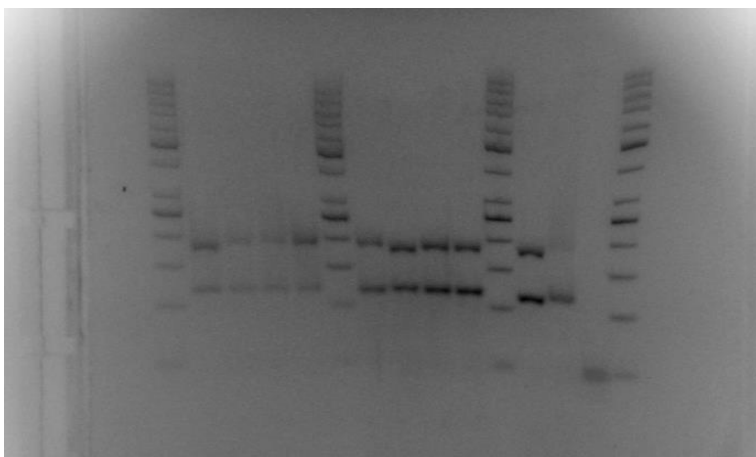

**Figure S8:** Strain 31-40; Primer Bc7, Bc10

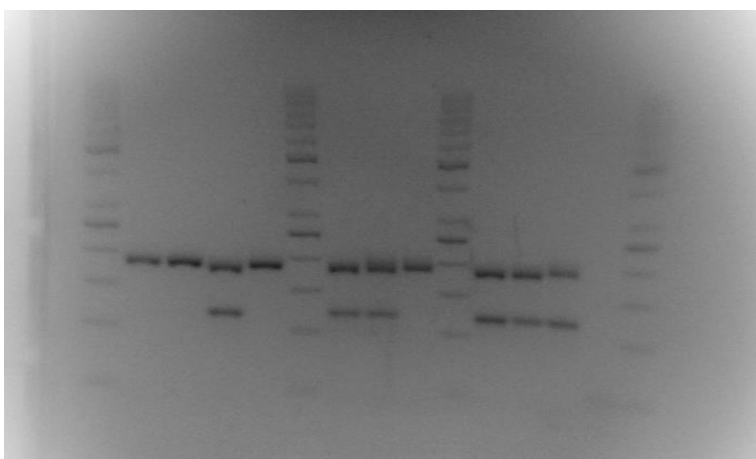

**Figure S9:** Strain 41-50; Primer Bc7, Bc10

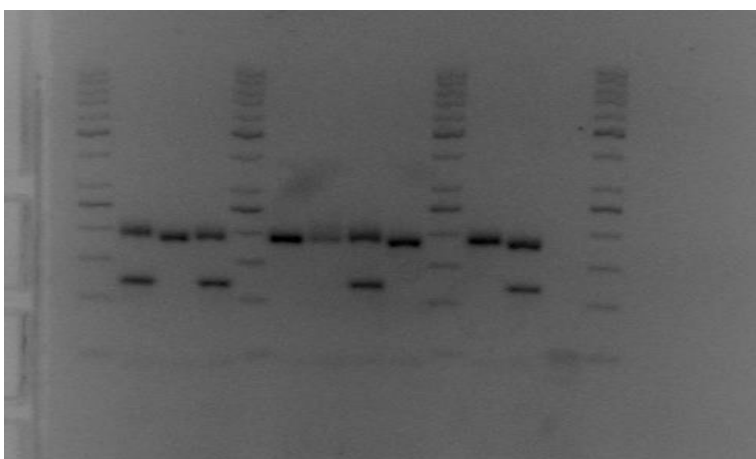

**Figure S10:** Strain 51-59; Primer Bc7, Bc10

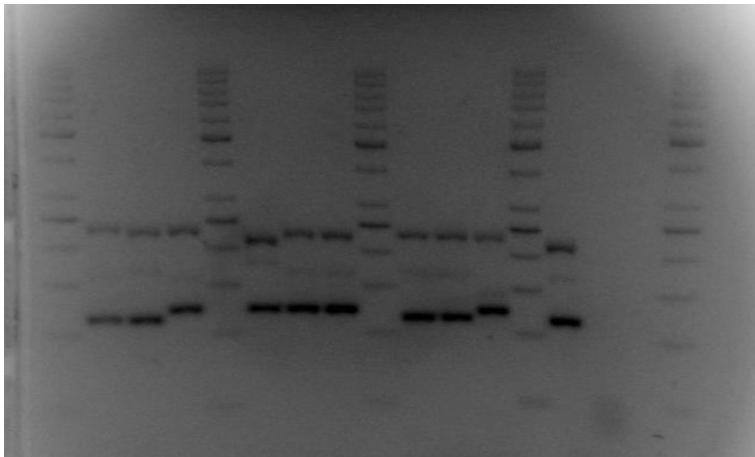

**Figure S11:** Strain 1-10; Primer Bc1, Bc2, Bc4

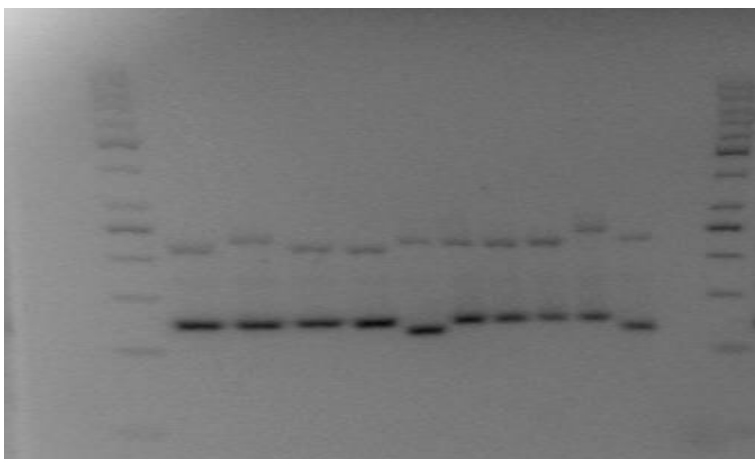

**Figure S12:** Strain 11-20; Primer Bc1, Bc2, Bc4

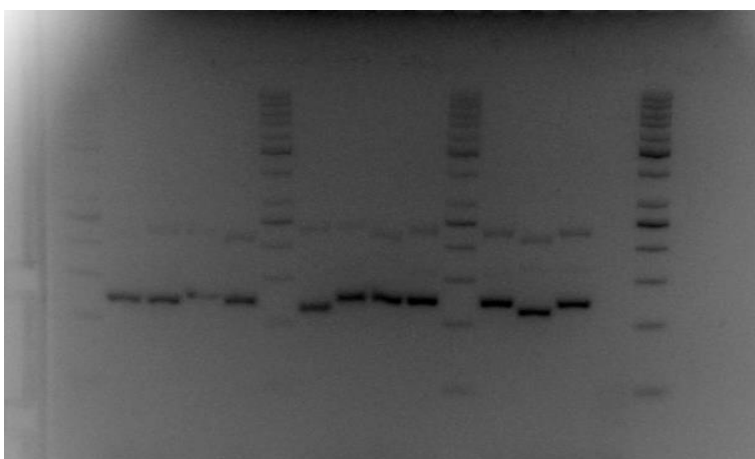

**Figure S13:** Strain 21-30; Primer Bc1, Bc2, Bc4

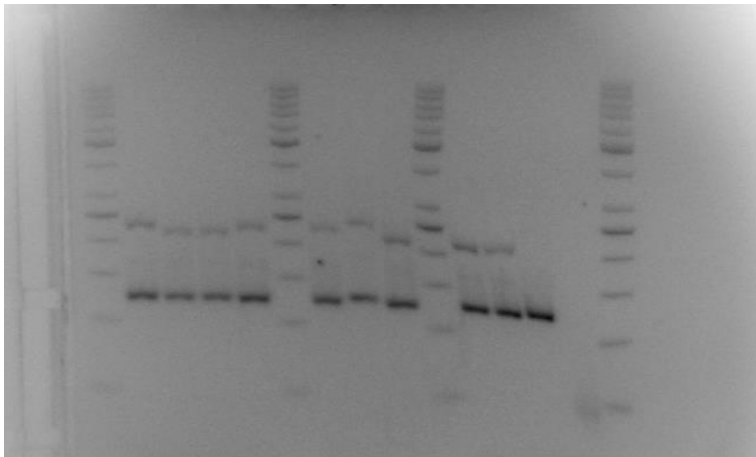

**Figure S14:** Strain 31-40; Primer Bc1, Bc2, Bc4

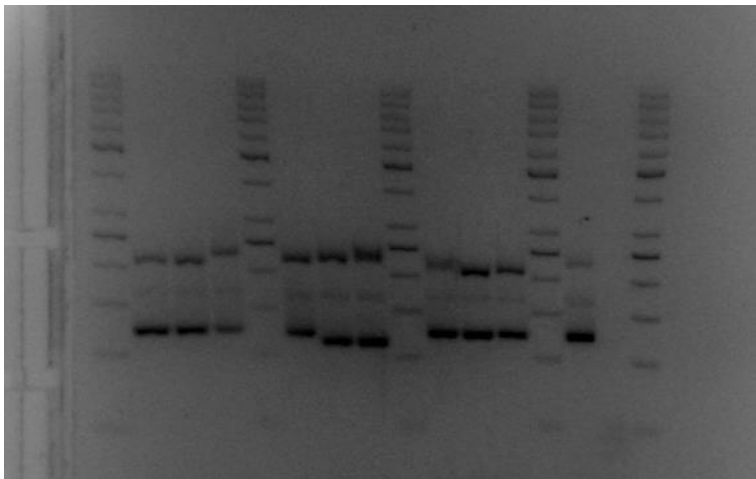

**Figure S15:** Strain 41-50; Primer Bc1, Bc2, Bc4

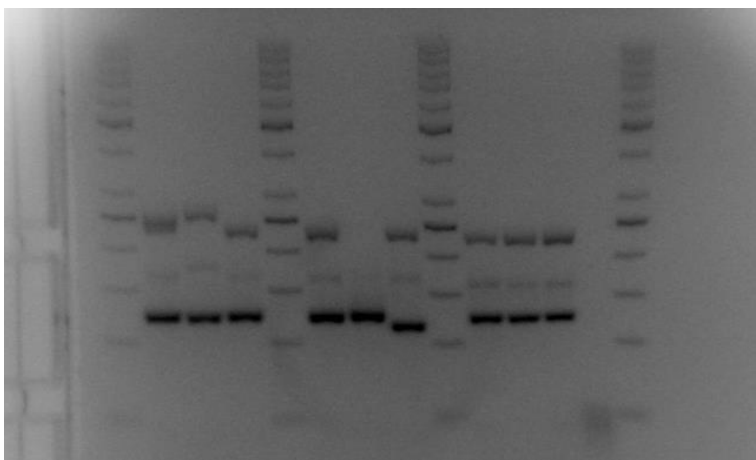

**Figure S16:** Strain 51-59; Primer Bc1, Bc2, Bc 4

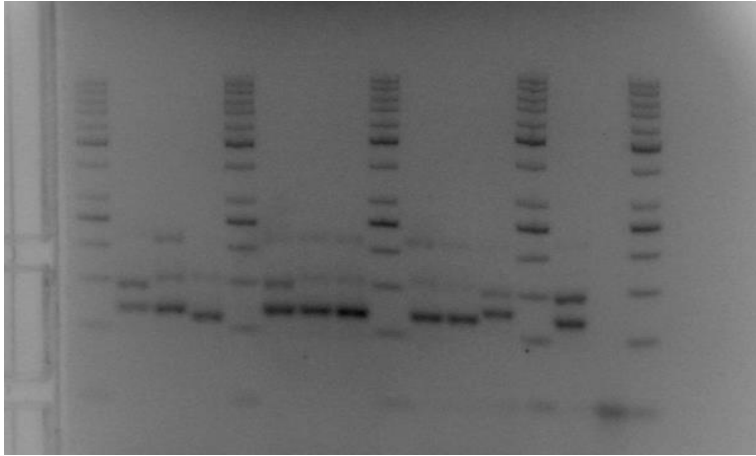

**Figure S17:** Strain 1-10; Primer Bc3, Bc5, Bc6

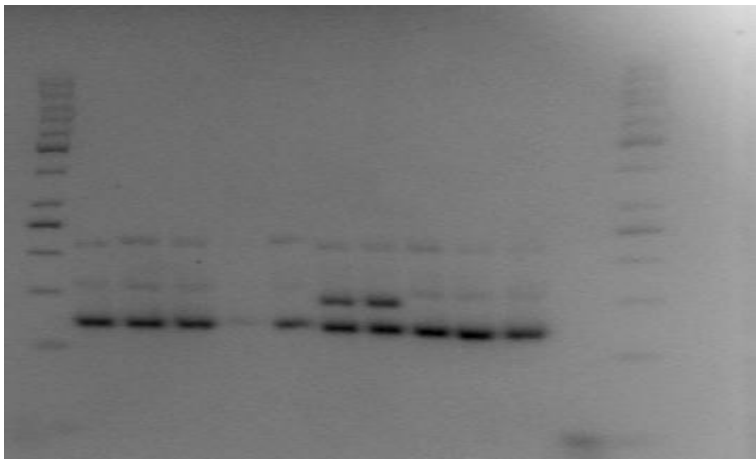

**Figure S18:** Strain 11-20; Primer Bc3, Bc5, Bc6

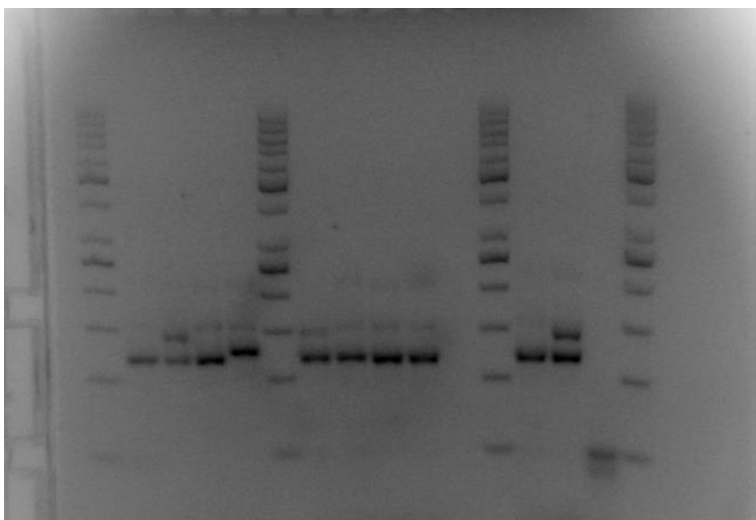

**Figure S19:** Strain 21-30; Primer Bc3, Bc5, Bc6

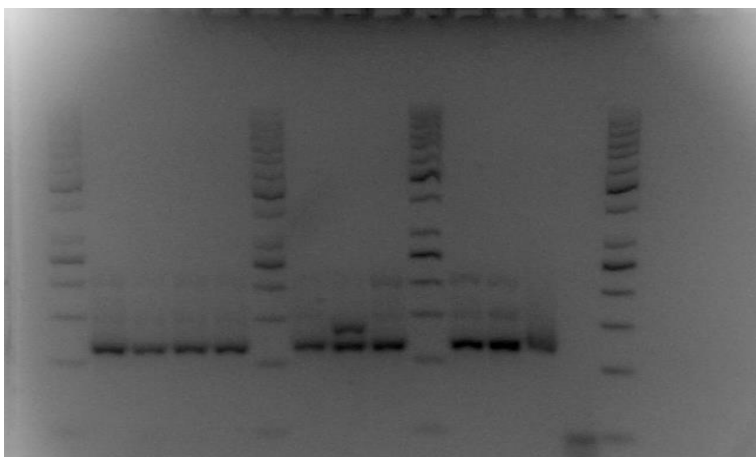

**Figure S20:** Strain 31-40; Primer Bc3, Bc5, Bc6

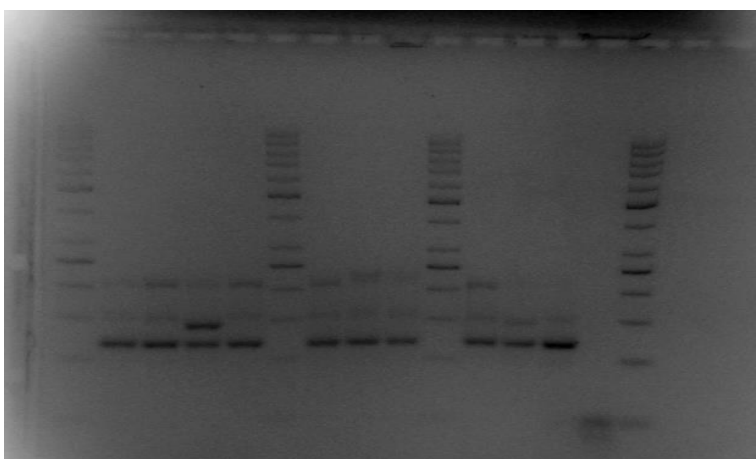

**Figure S21:** Strain 41-50; Primer Bc3, Bc5, Bc6

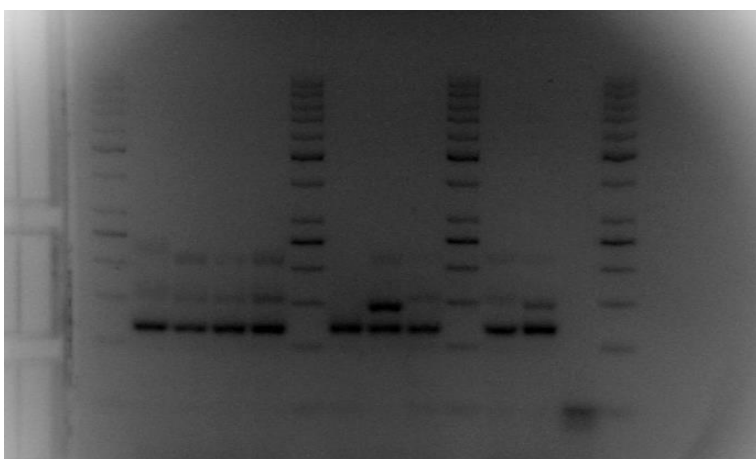

**Figure S22:** Strain 51-59; Primer Bc3, Bc5, Bc6

**Table S2:** Overview of the band sizes analysed with agarose gel electrophoresis and ImageJ. Given are the analysed strains and the primers used with their specific band sizes. Empty cells represent no detectable bands with the specific strain/primer.

| Strain | Bc1 | Bc2 | Bc3 | Bc4 | Bc5 | Bc6 | Bc7 | Bc10 |
|--------|-----|-----|-----|-----|-----|-----|-----|------|
| 1      | 234 | 163 |     | 115 | 145 | 116 | 187 |      |
| 2      | 228 | 170 | 215 | 115 | 153 | 114 | 186 | 119  |
| 3      | 228 | 156 |     | 123 | 151 | 105 | 187 |      |
| 4      | 214 | 181 | 218 | 123 | 149 | 117 | 190 | 120  |
| 5      | 224 | 164 | 218 | 120 | 154 | 116 | 189 | 118  |
| 6      | 217 | 163 | 217 | 118 | 152 | 113 | 185 | 115  |
| 7      | 229 | 167 | 214 | 111 | 152 | 113 | 185 |      |
| 8      | 224 | 162 | 208 | 111 | 146 | 110 | 178 |      |
| 9      | 222 | 132 |     | 115 | 137 | 113 | 172 |      |
| 10     | 217 | 167 | 224 | 114 | 148 | 119 | 182 |      |
| 11     | 214 |     | 220 | 120 | 158 | 117 | 194 |      |
| 12     | 231 |     | 222 | 121 | 154 | 116 | 193 |      |
| 13     | 218 |     | 221 | 122 | 154 | 116 | 194 |      |
| 14     | 217 |     |     | 122 |     | 116 | 192 |      |
| 15     | 235 |     | 224 | 116 | 152 | 116 | 190 |      |
| 16     | 230 |     | 214 | 126 | 137 | 112 | 191 | 117  |
| 17     | 230 |     | 213 | 127 | 135 | 111 | 177 | 114  |
| 18     | 231 |     | 210 | 129 | 144 | 109 | 175 | 115  |
| 19     | 256 |     | 208 | 130 | 143 | 108 | 189 |      |
| 20     | 240 |     | 206 | 121 | 142 | 107 | 189 |      |
| 21     |     |     |     | 119 |     | 116 | 188 | 112  |
| 22     | 229 |     |     | 114 | 138 | 111 | 183 | 115  |
| 23     | 209 |     | 204 | 112 | 149 | 111 | 192 | 111  |
| 24     | 233 |     | 200 | 115 | 145 | 116 | 183 | 112  |
| 25     | 243 |     |     | 129 | 154 | 122 | 191 | 120  |
| 26     | 224 |     | 231 | 125 | 162 | 123 | 183 | 115  |
| 27     | 230 |     | 231 | 123 | 167 | 127 | 187 | 112  |
| 28     | 231 |     | 240 | 122 | 168 | 130 | 176 | 108  |
| 29     | 220 |     |     | 110 | 157 | 117 | 190 | 113  |
| 30     | 233 |     | 220 | 122 | 140 | 114 | 189 | 107  |
| 31     | 236 | 168 | 206 | 121 | 149 | 113 | 187 | 119  |
| 32     | 227 | 167 |     | 121 | 149 | 111 | 192 | 116  |
| 33     | 226 | 168 | 204 | 120 | 147 | 111 | 194 | 116  |
| 34     | 233 | 171 | 202 | 119 | 146 | 112 | 193 | 116  |
| 35     | 228 | 163 |     | 117 | 161 | 118 | 196 | 117  |
| 36     | 233 | 177 | 225 | 116 | 149 | 121 | 183 | 119  |
| 37     | 195 | 146 | 234 | 107 | 169 | 127 | 187 | 116  |
| 38     | 216 | 162 | 203 | 121 | 149 | 115 | 184 | 114  |
| 39     | 210 | 156 | 198 | 115 | 147 | 110 | 182 | 109  |
| 40     |     | 154 |     | 111 |     | 110 | 191 | 108  |
| 41     | 213 | 163 | 208 | 120 | 147 | 115 | 183 |      |
| 42     | 209 | 165 | 203 | 118 | 146 | 115 | 176 |      |
| 43     | 220 | 162 | 201 | 117 | 136 | 114 | 165 | 107  |
| 44     | 227 | 166 | 200 | 121 | 147 | 114 | 167 |      |
| 45     | 223 | 165 | 215 | 110 | 154 | 118 | 181 | 118  |
| 46     | 221 | 158 | 227 | 107 | 160 | 118 | 178 | 115  |
| 47     | 226 | 171 | 226 | 123 | 156 | 117 | 176 |      |
| 48     | 208 | 165 | 211 | 120 | 153 | 117 | 180 | 116  |
| 49     | 207 | 161 |     | 118 | 147 | 115 | 175 | 110  |
| 50     | 231 | 169 |     | 121 | 147 | 111 | 174 | 105  |
| 51     | 241 | 167 | 223 | 118 | 152 | 114 | 196 | 119  |
| 52     | 255 | 178 | 206 | 119 | 149 | 110 | 182 |      |
| 53     | 226 | 166 | 200 | 118 | 143 | 107 | 185 | 111  |
| 54     | 229 | 165 | 189 | 120 | 139 | 107 | 195 |      |
| 55     |     |     |     | 118 |     | 119 | 196 |      |
| 56     | 225 | 161 | 217 | 107 | 145 | 118 | 200 | 121  |
| 57     | 237 | 167 |     | 125 | 156 | 118 | 189 |      |
| 58     | 238 | 168 | 215 | 127 | 153 | 115 | 191 |      |
| 59     | 240 | 171 | 209 | 131 | 142 | 113 | 186 | 117  |
