# Supplementary material for: Molecular Biological Methods to Assess Different Botrytis cinerea Strains on Grapes
Source: MDPI journal article supplement (doi:10.3390/microbiolres15020037), 2024-04-19
Supplement: s1 [file s1]

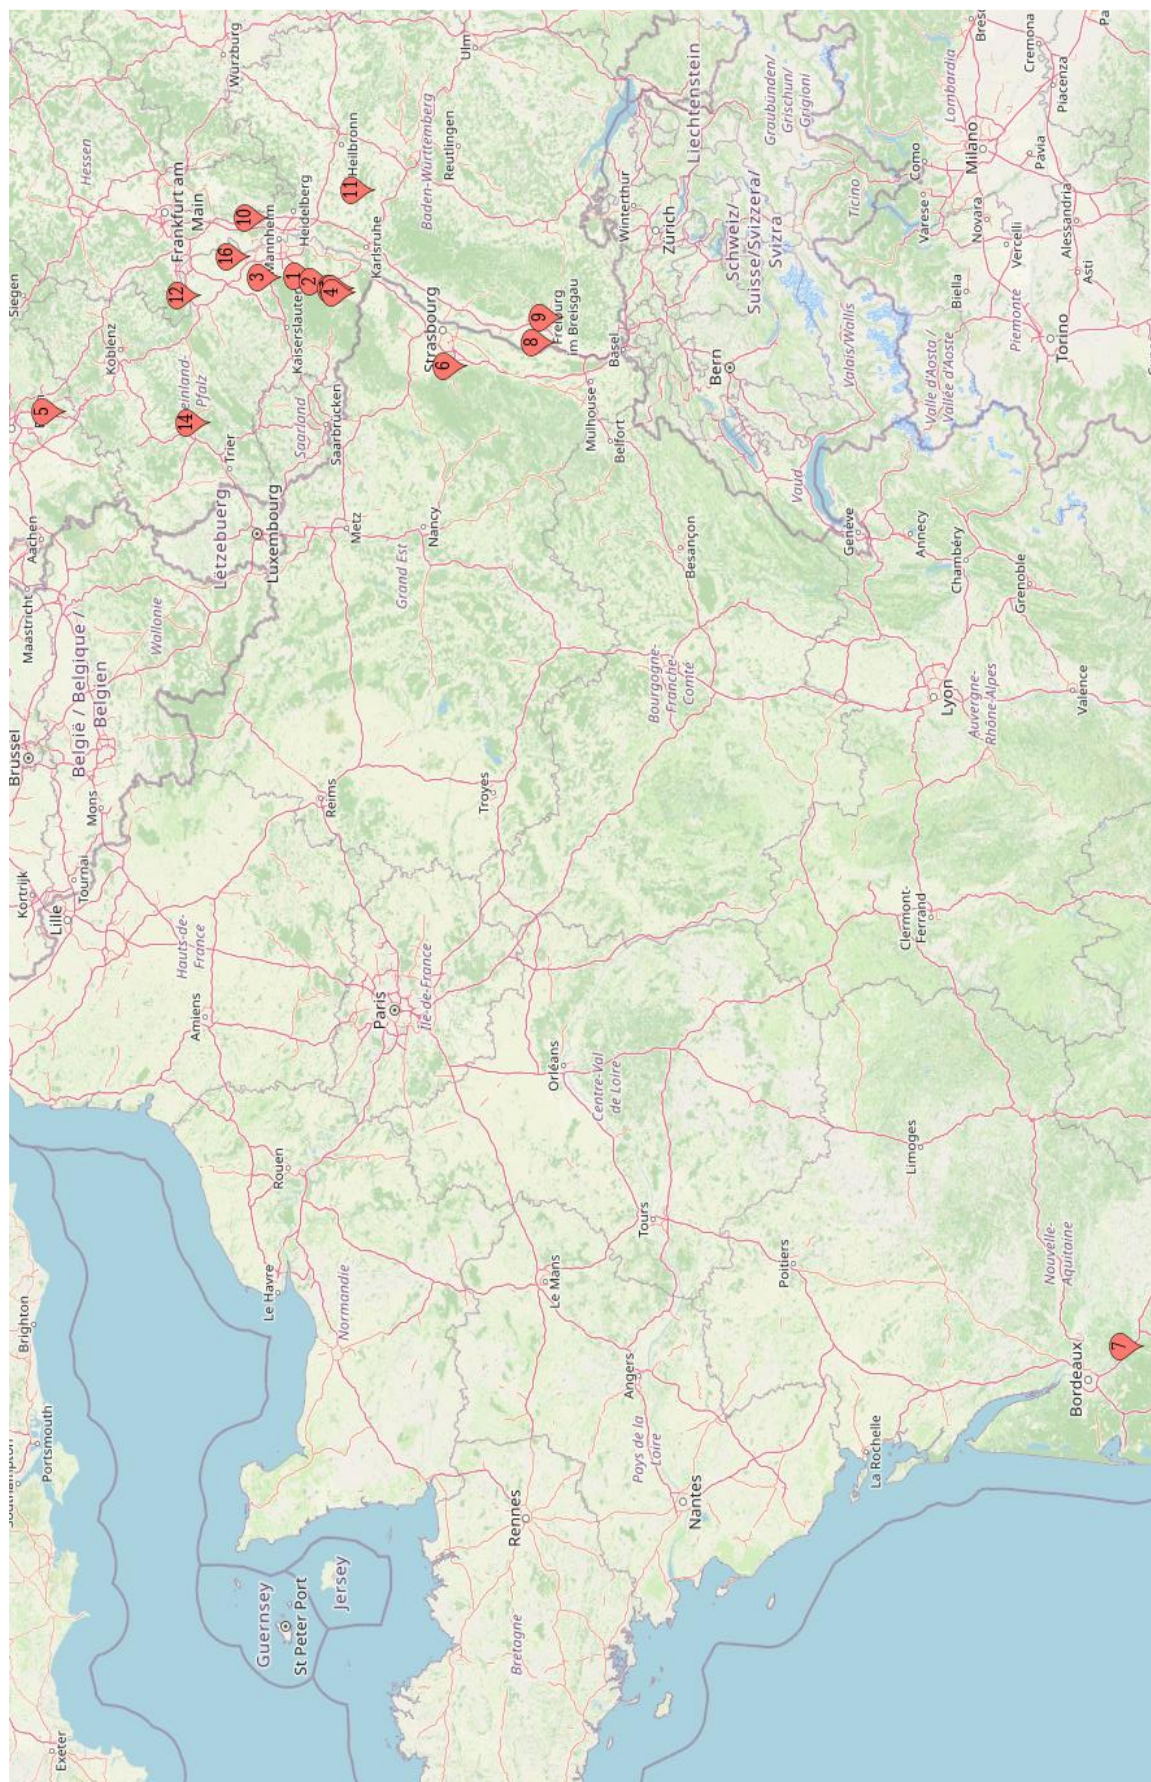

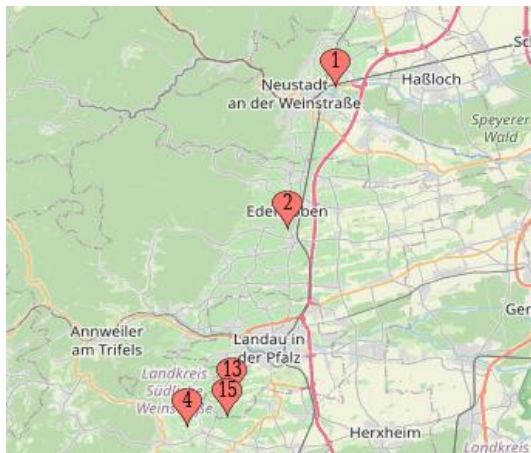

**Figure S2:** Zoomed in map containing some of the locations, where *Botrytis cinerea* was sampled from grape berries. The map is zoomed in to give a more detailed view on strains from close regions.

**Table S1:** List of the locations, which are marked in the map of S1 and S2.

| Number | Location             |
|--------|----------------------|
| 1      | Mußbach              |
| 2      | Edenkoben            |
| 3      | Grünstadt            |
| 4      | Göcklingen           |
| 5      | Bonn                 |
| 6      | Mutzig               |
| 7      | Barsac               |
| 8      | Ihringen             |
| 9      | Freiburg im Breisgau |
| 10     | Heppenheim           |
| 11     | Sternenfels          |
| 12     | Oestrich-Winkel      |
| 13     | Wollmesheim          |
| 14     | Zeltingen-Rachtig    |
| 15     | Mörzheim             |
| 16     | Mettenheim           |
