# Supplementary figures and images for: Molecular Biological Methods to Assess Different Botrytis cinerea Strains on Grapes
Source: MDPI journal article supplement (doi:10.3390/microbiolres15020037), 2024-04-19

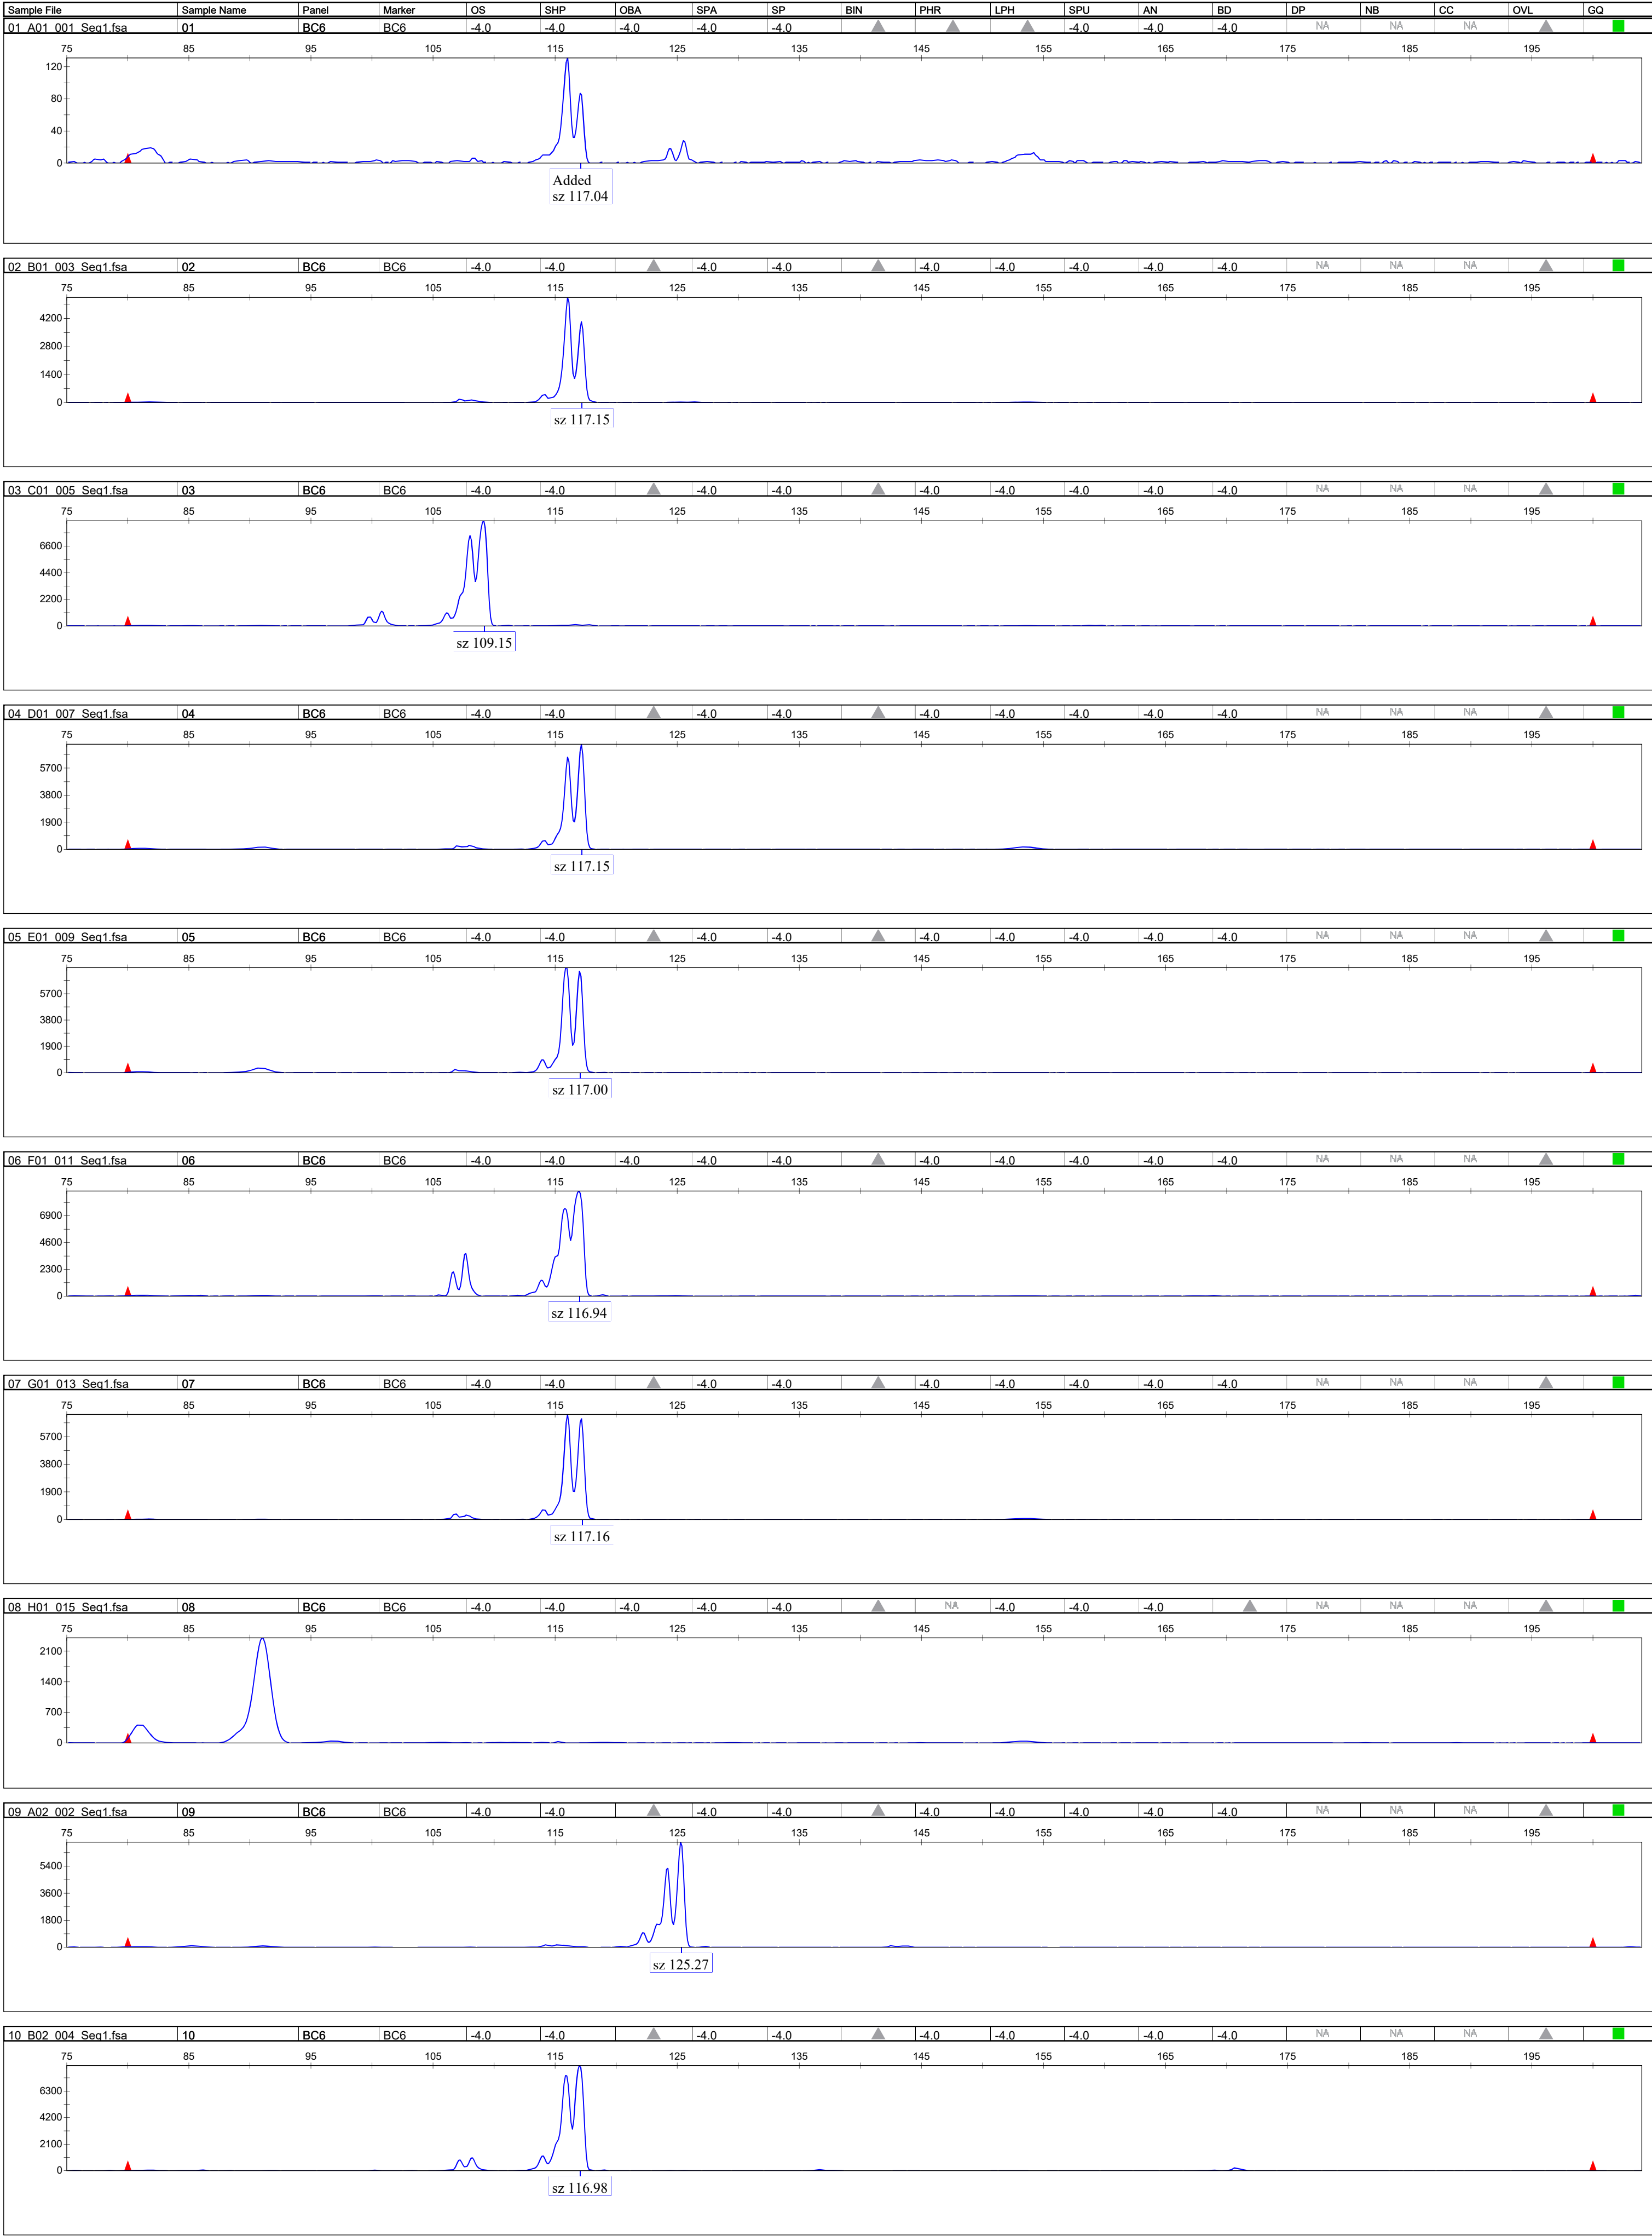

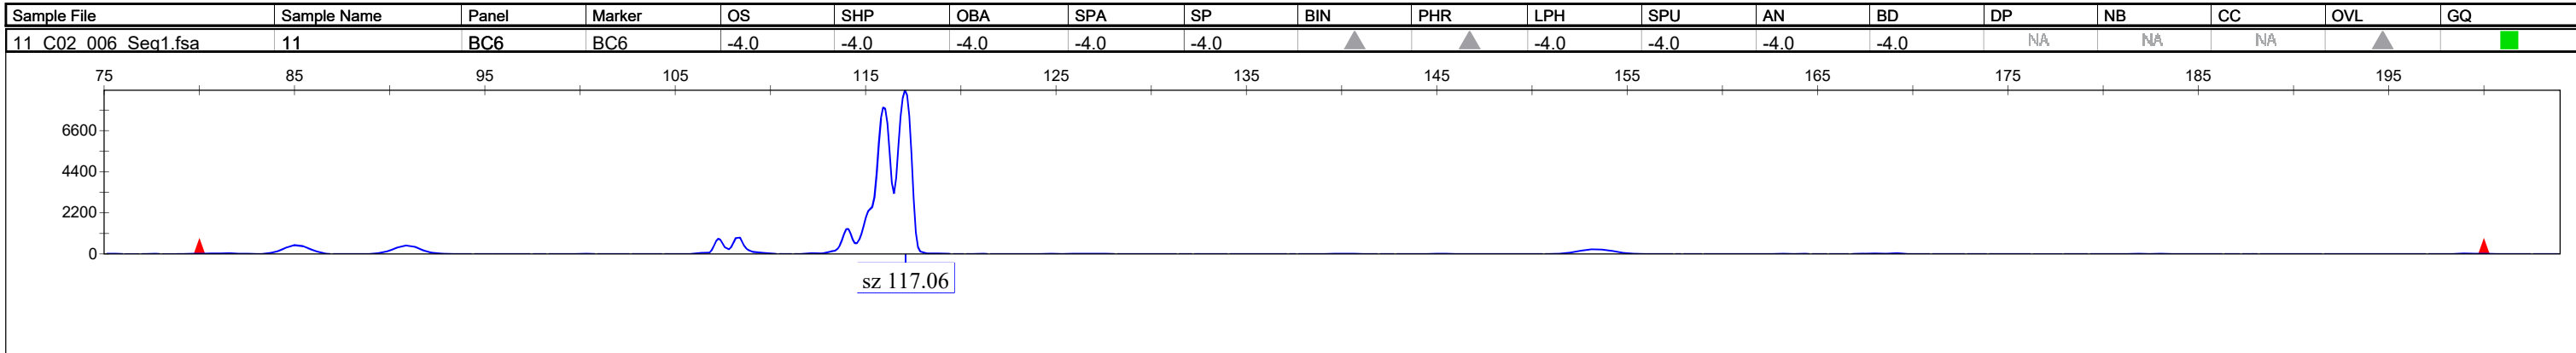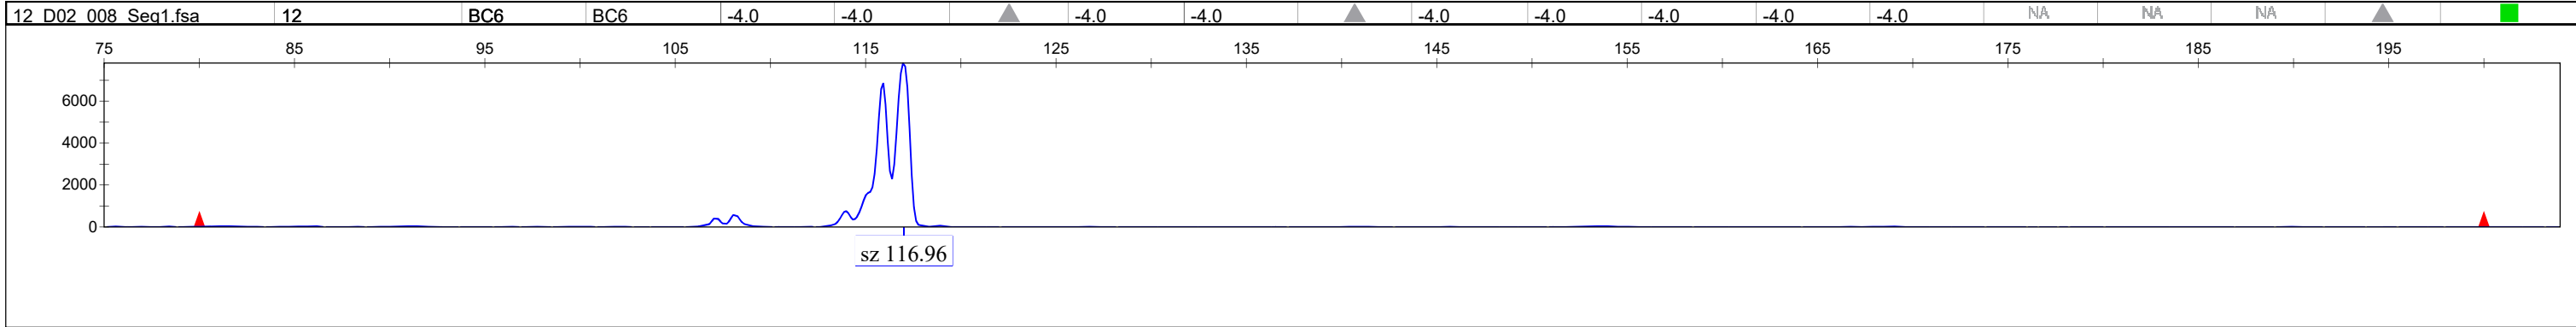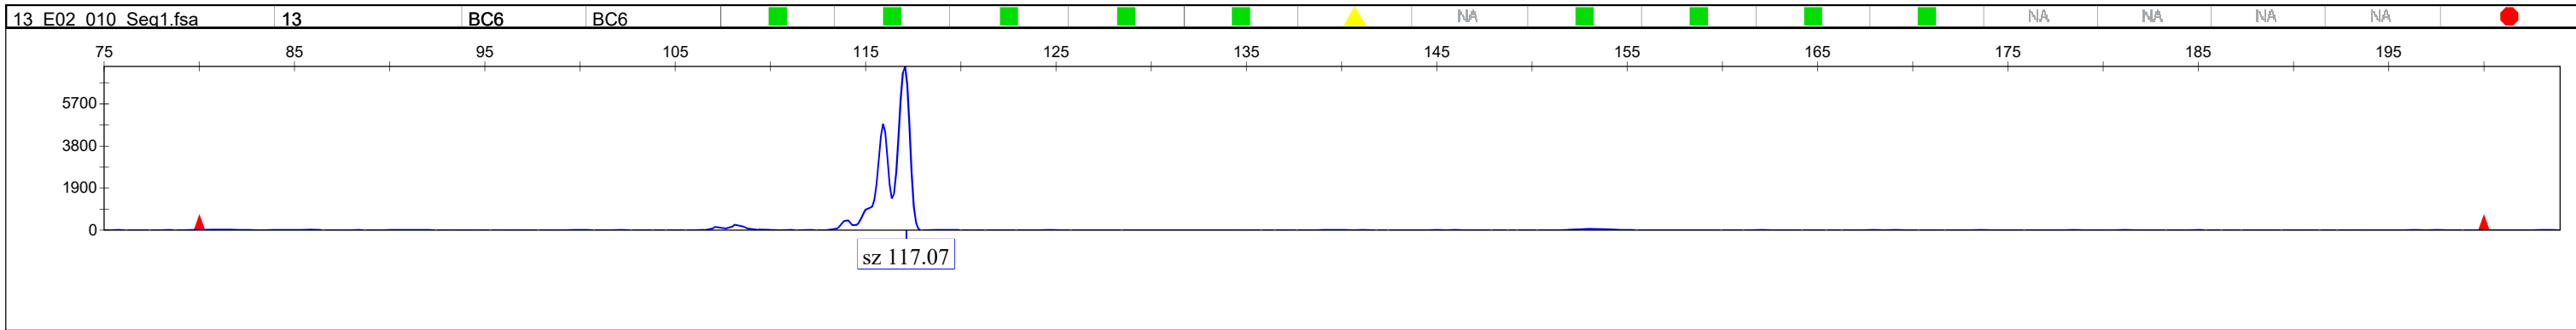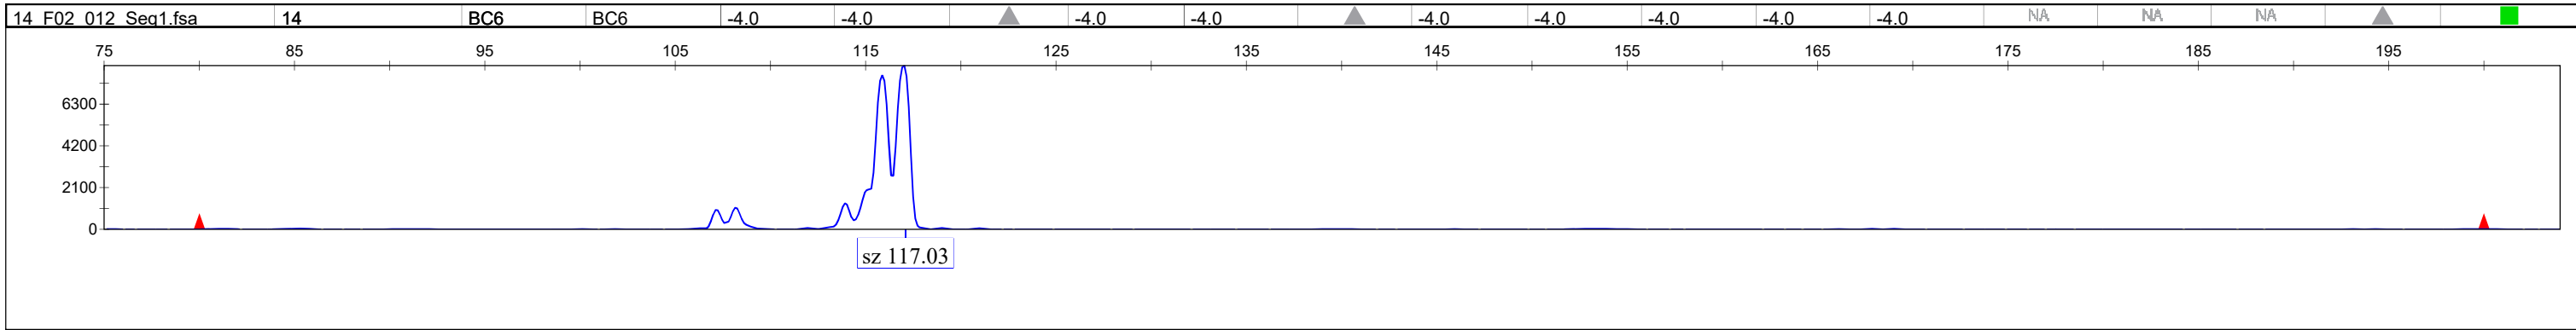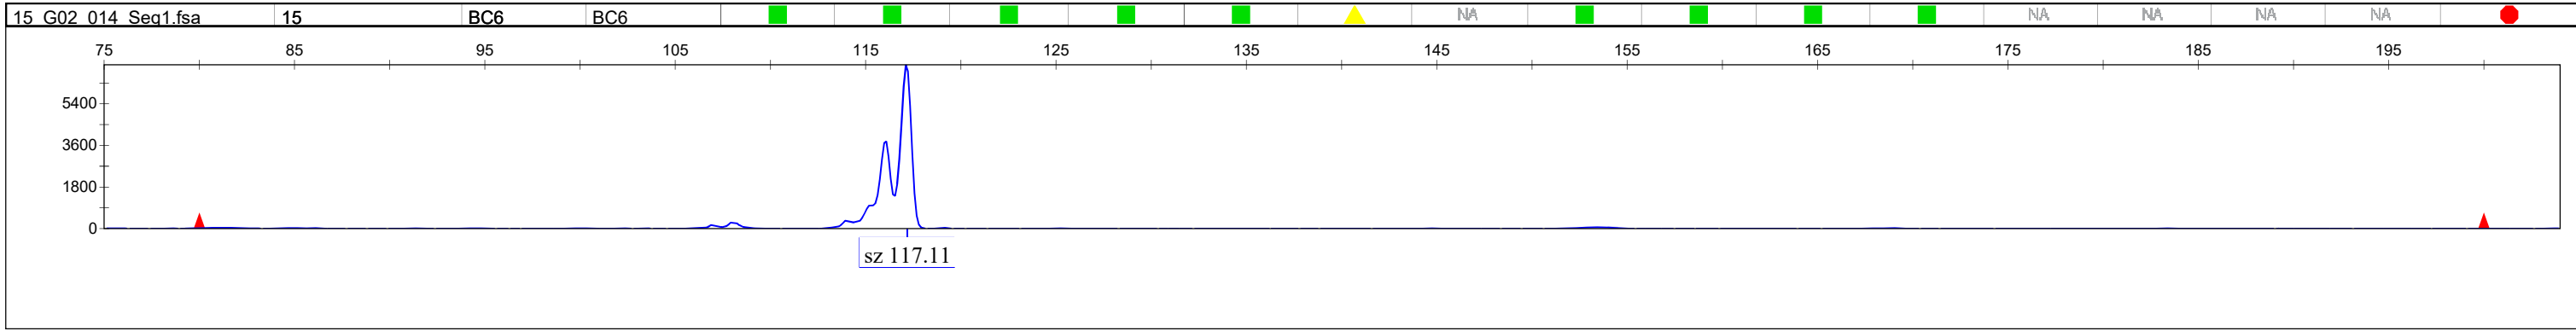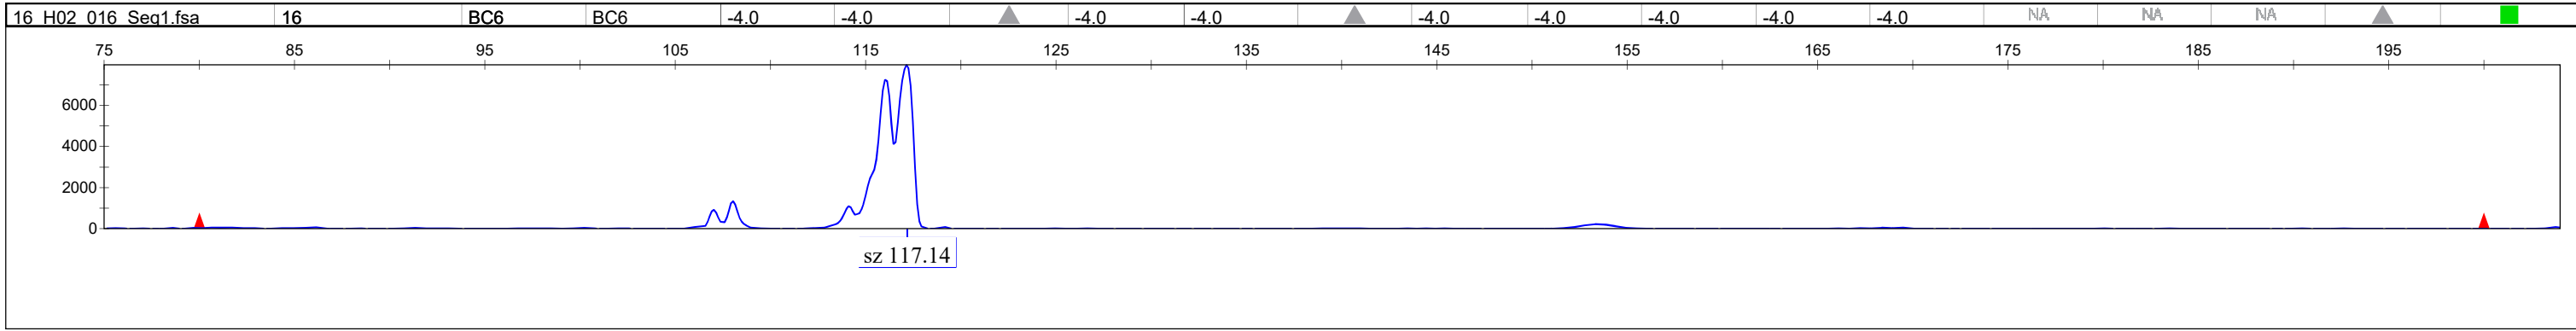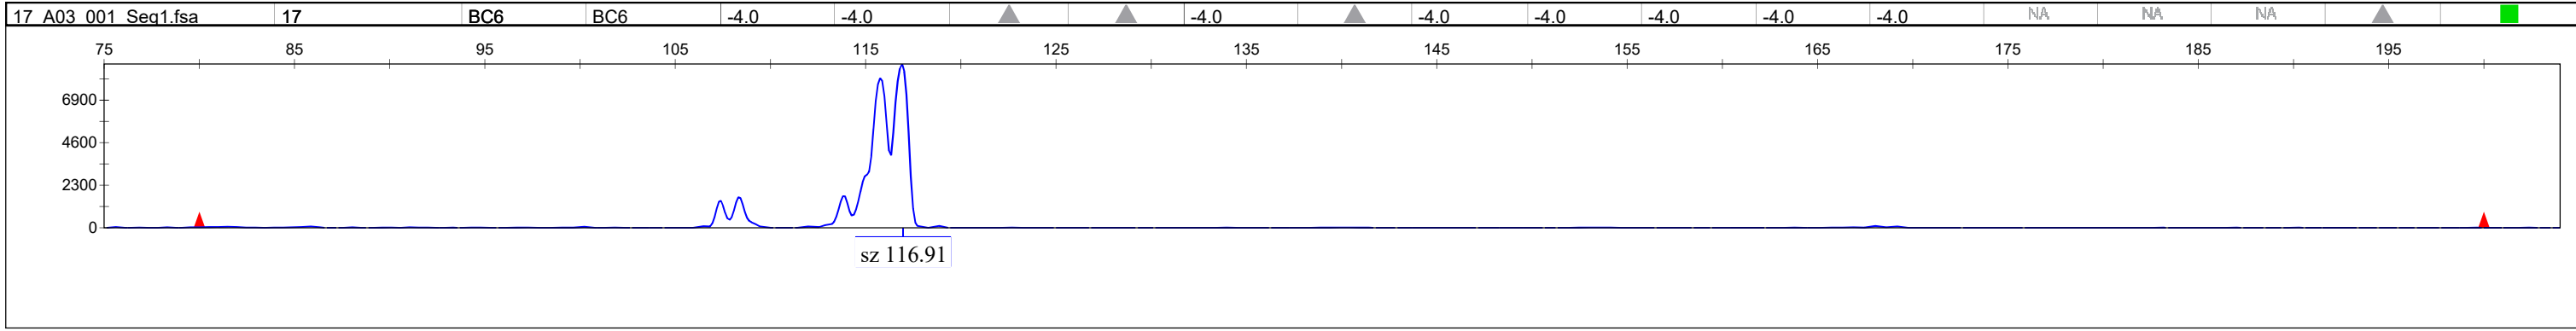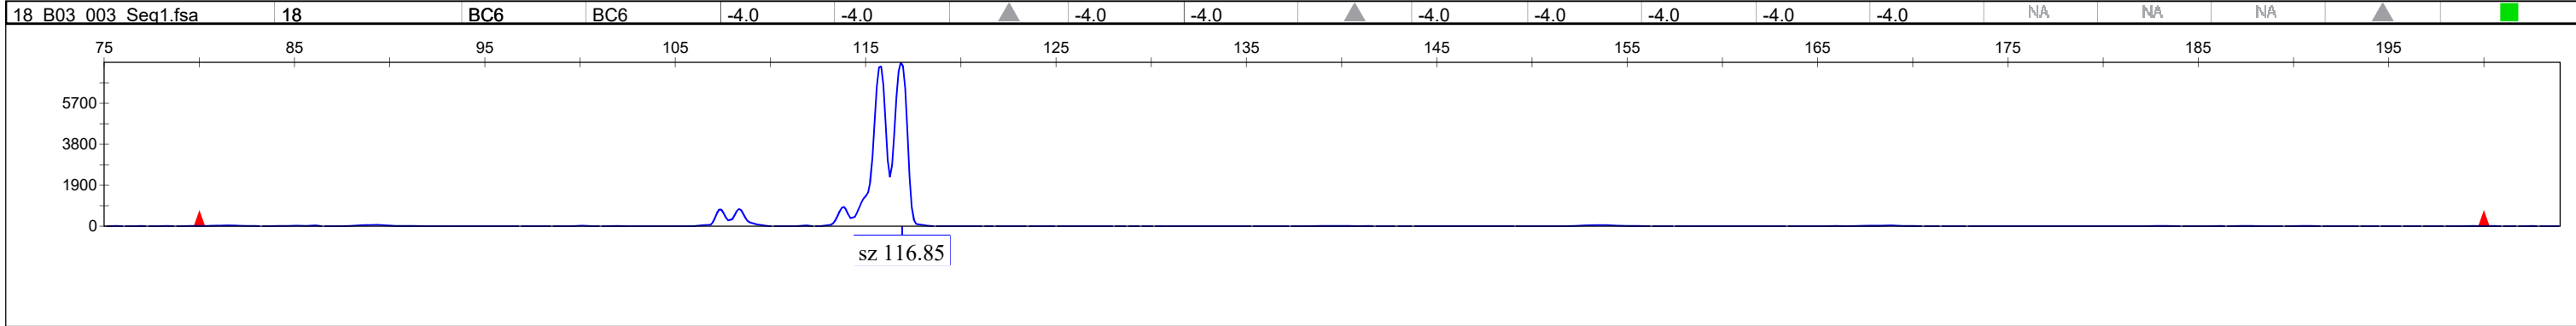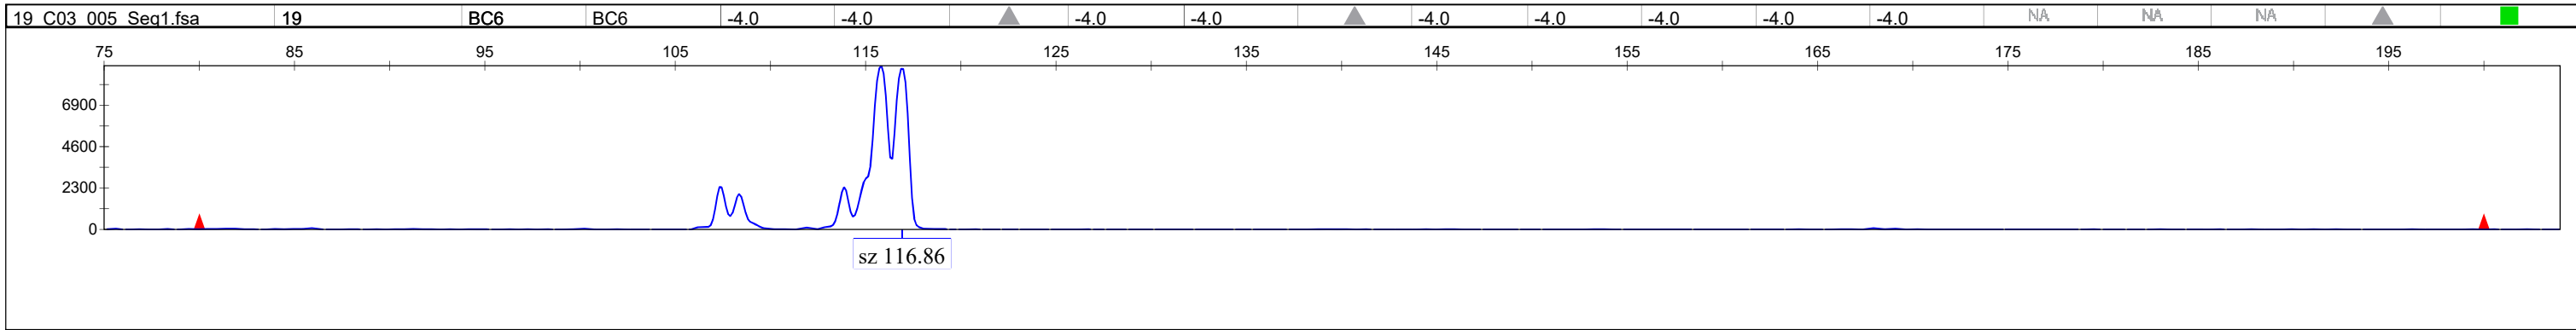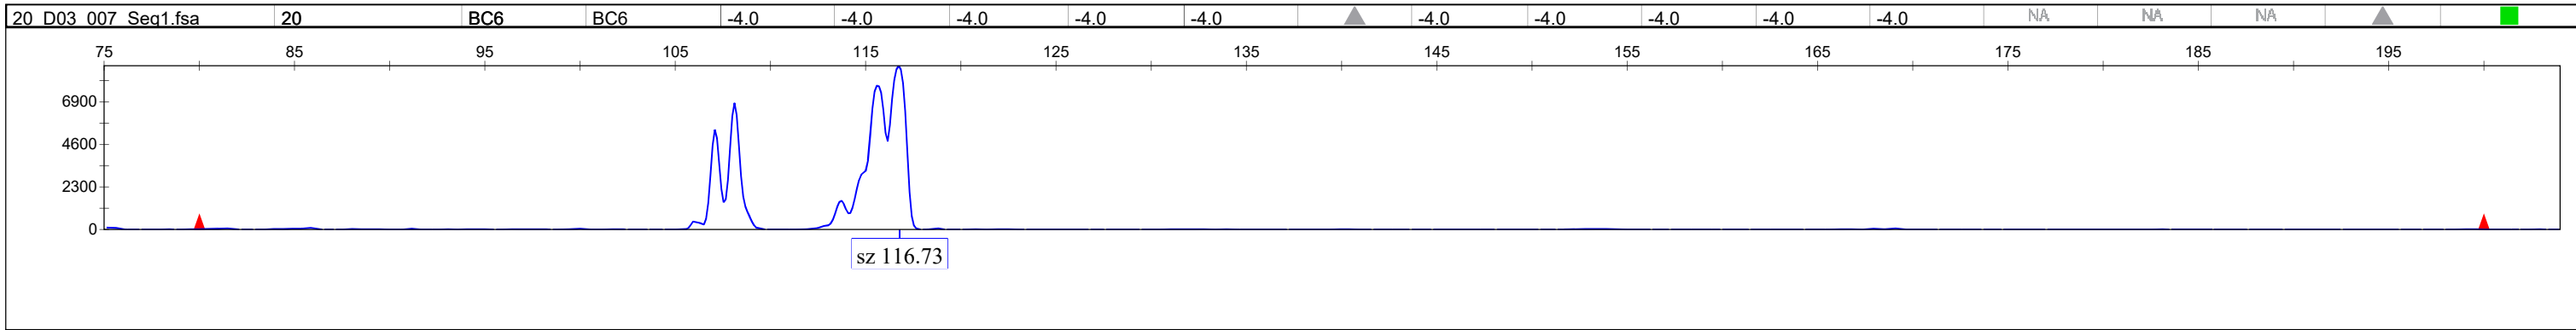

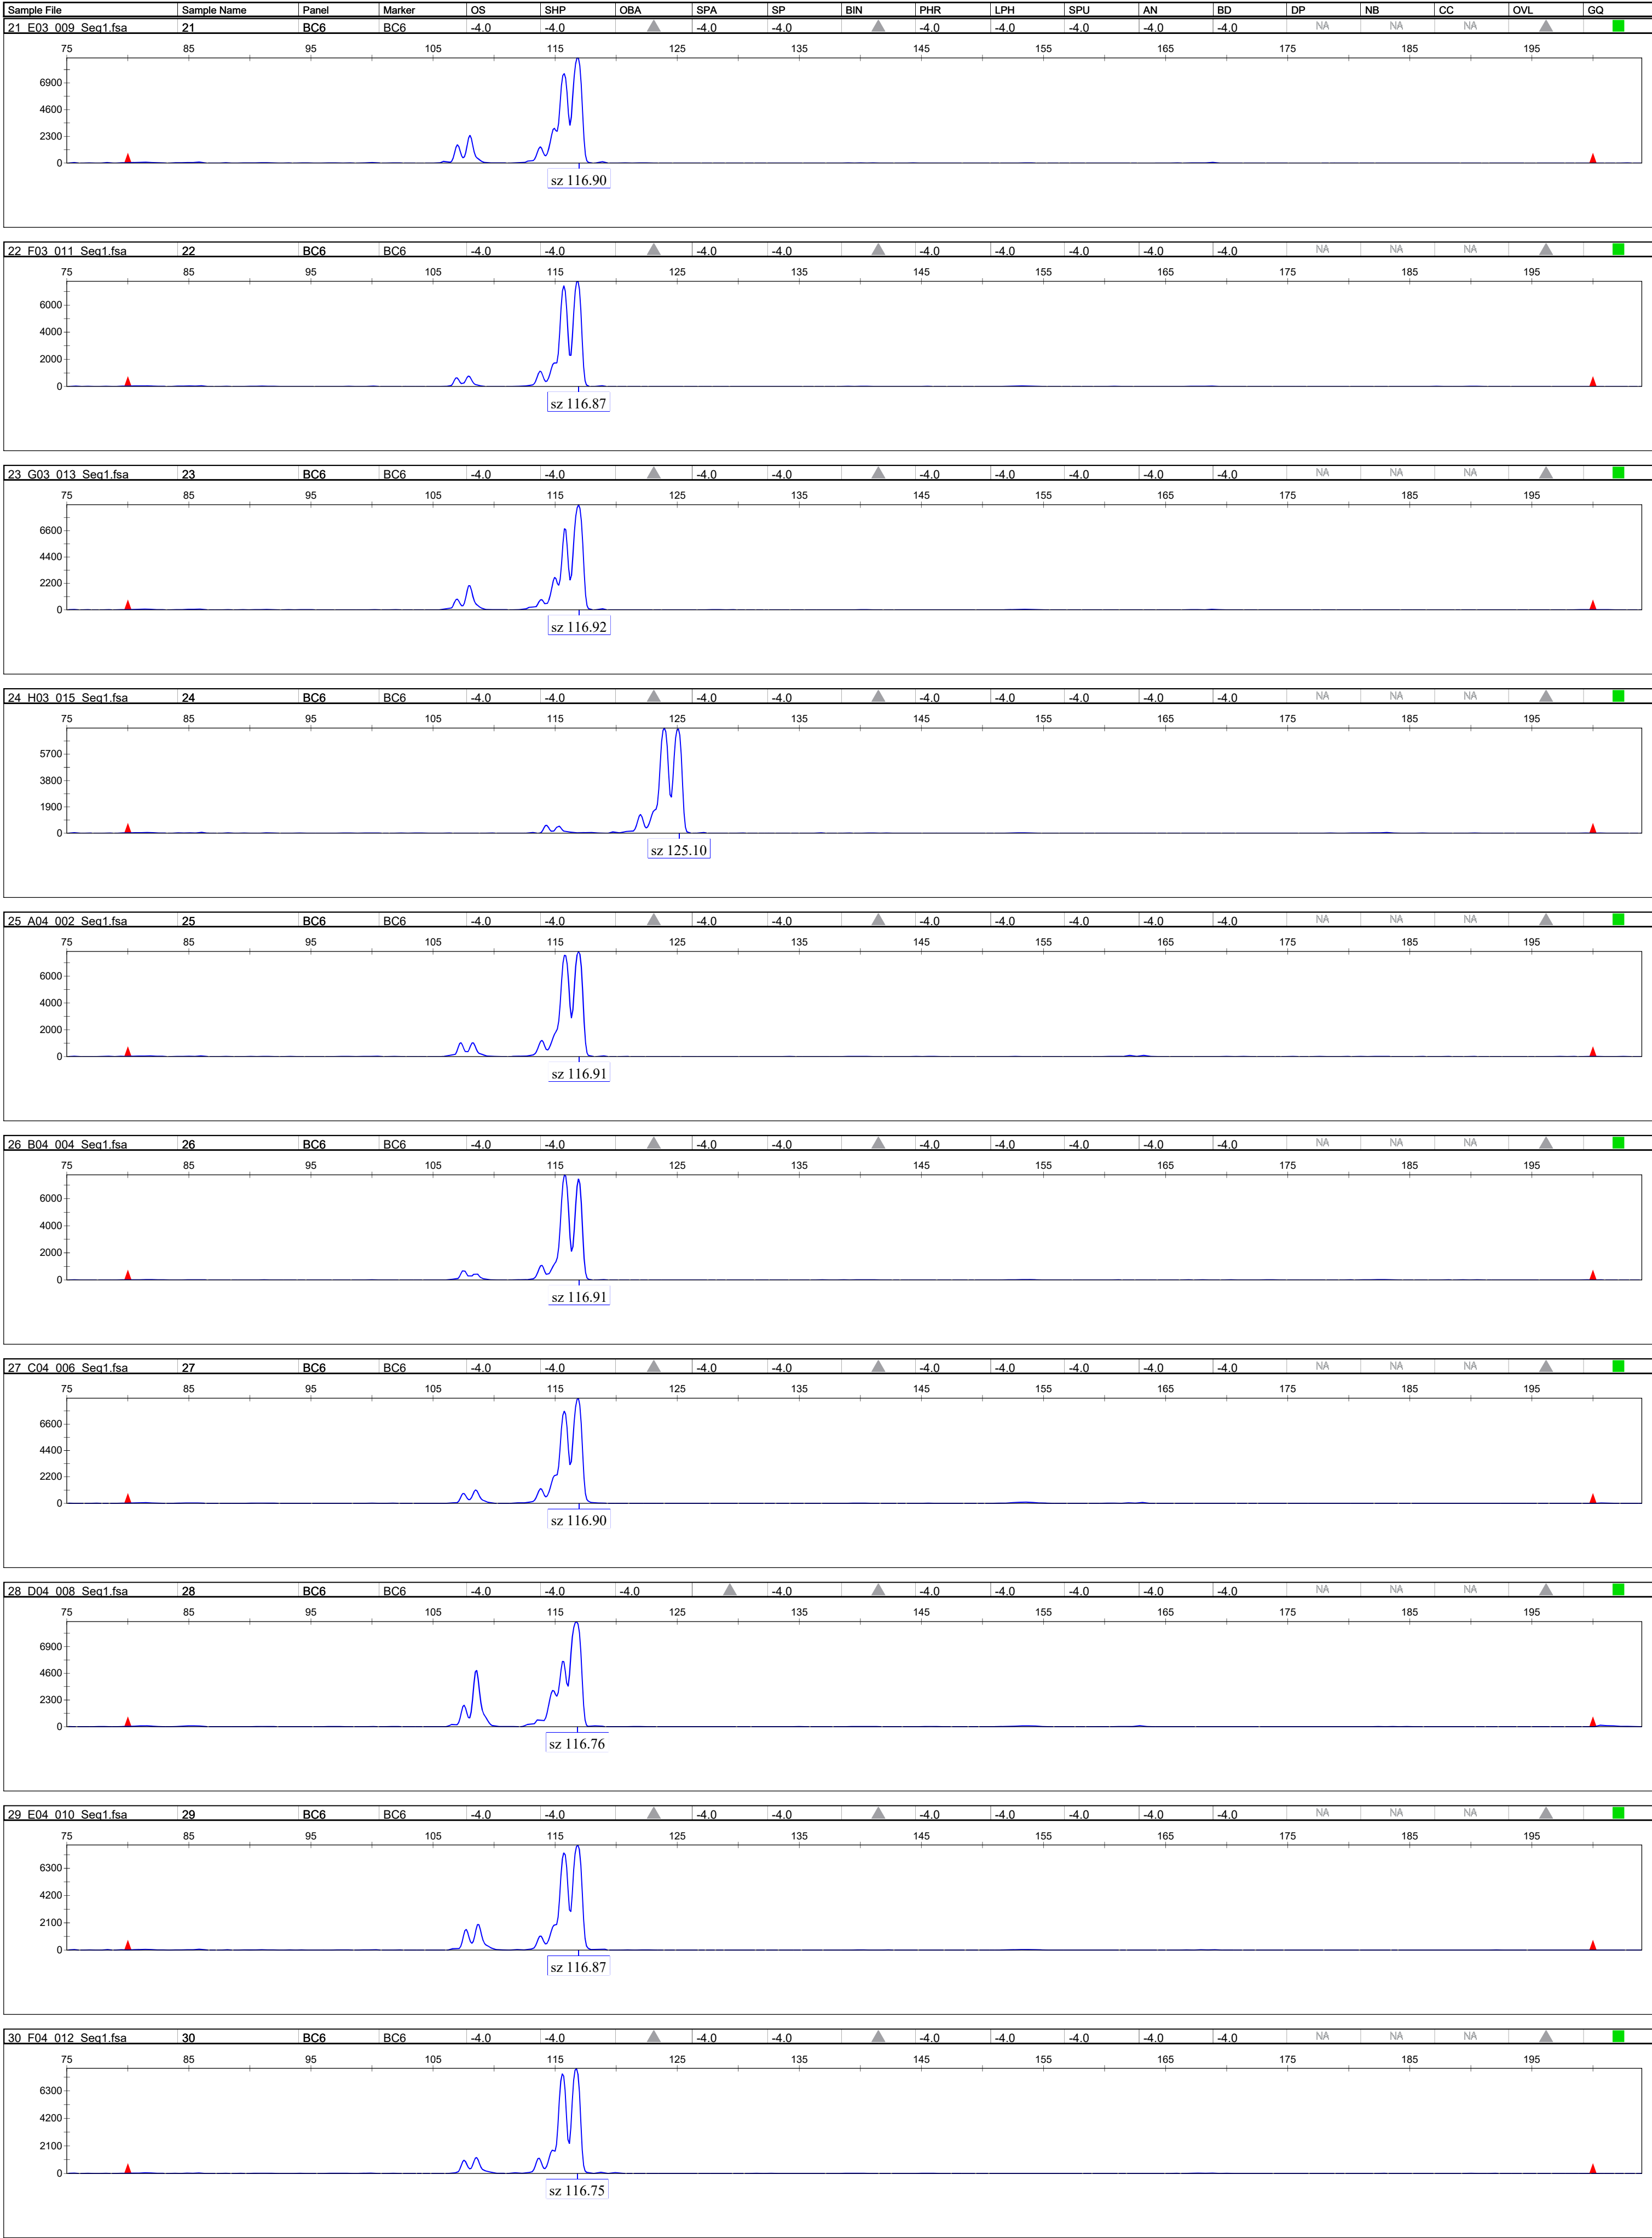

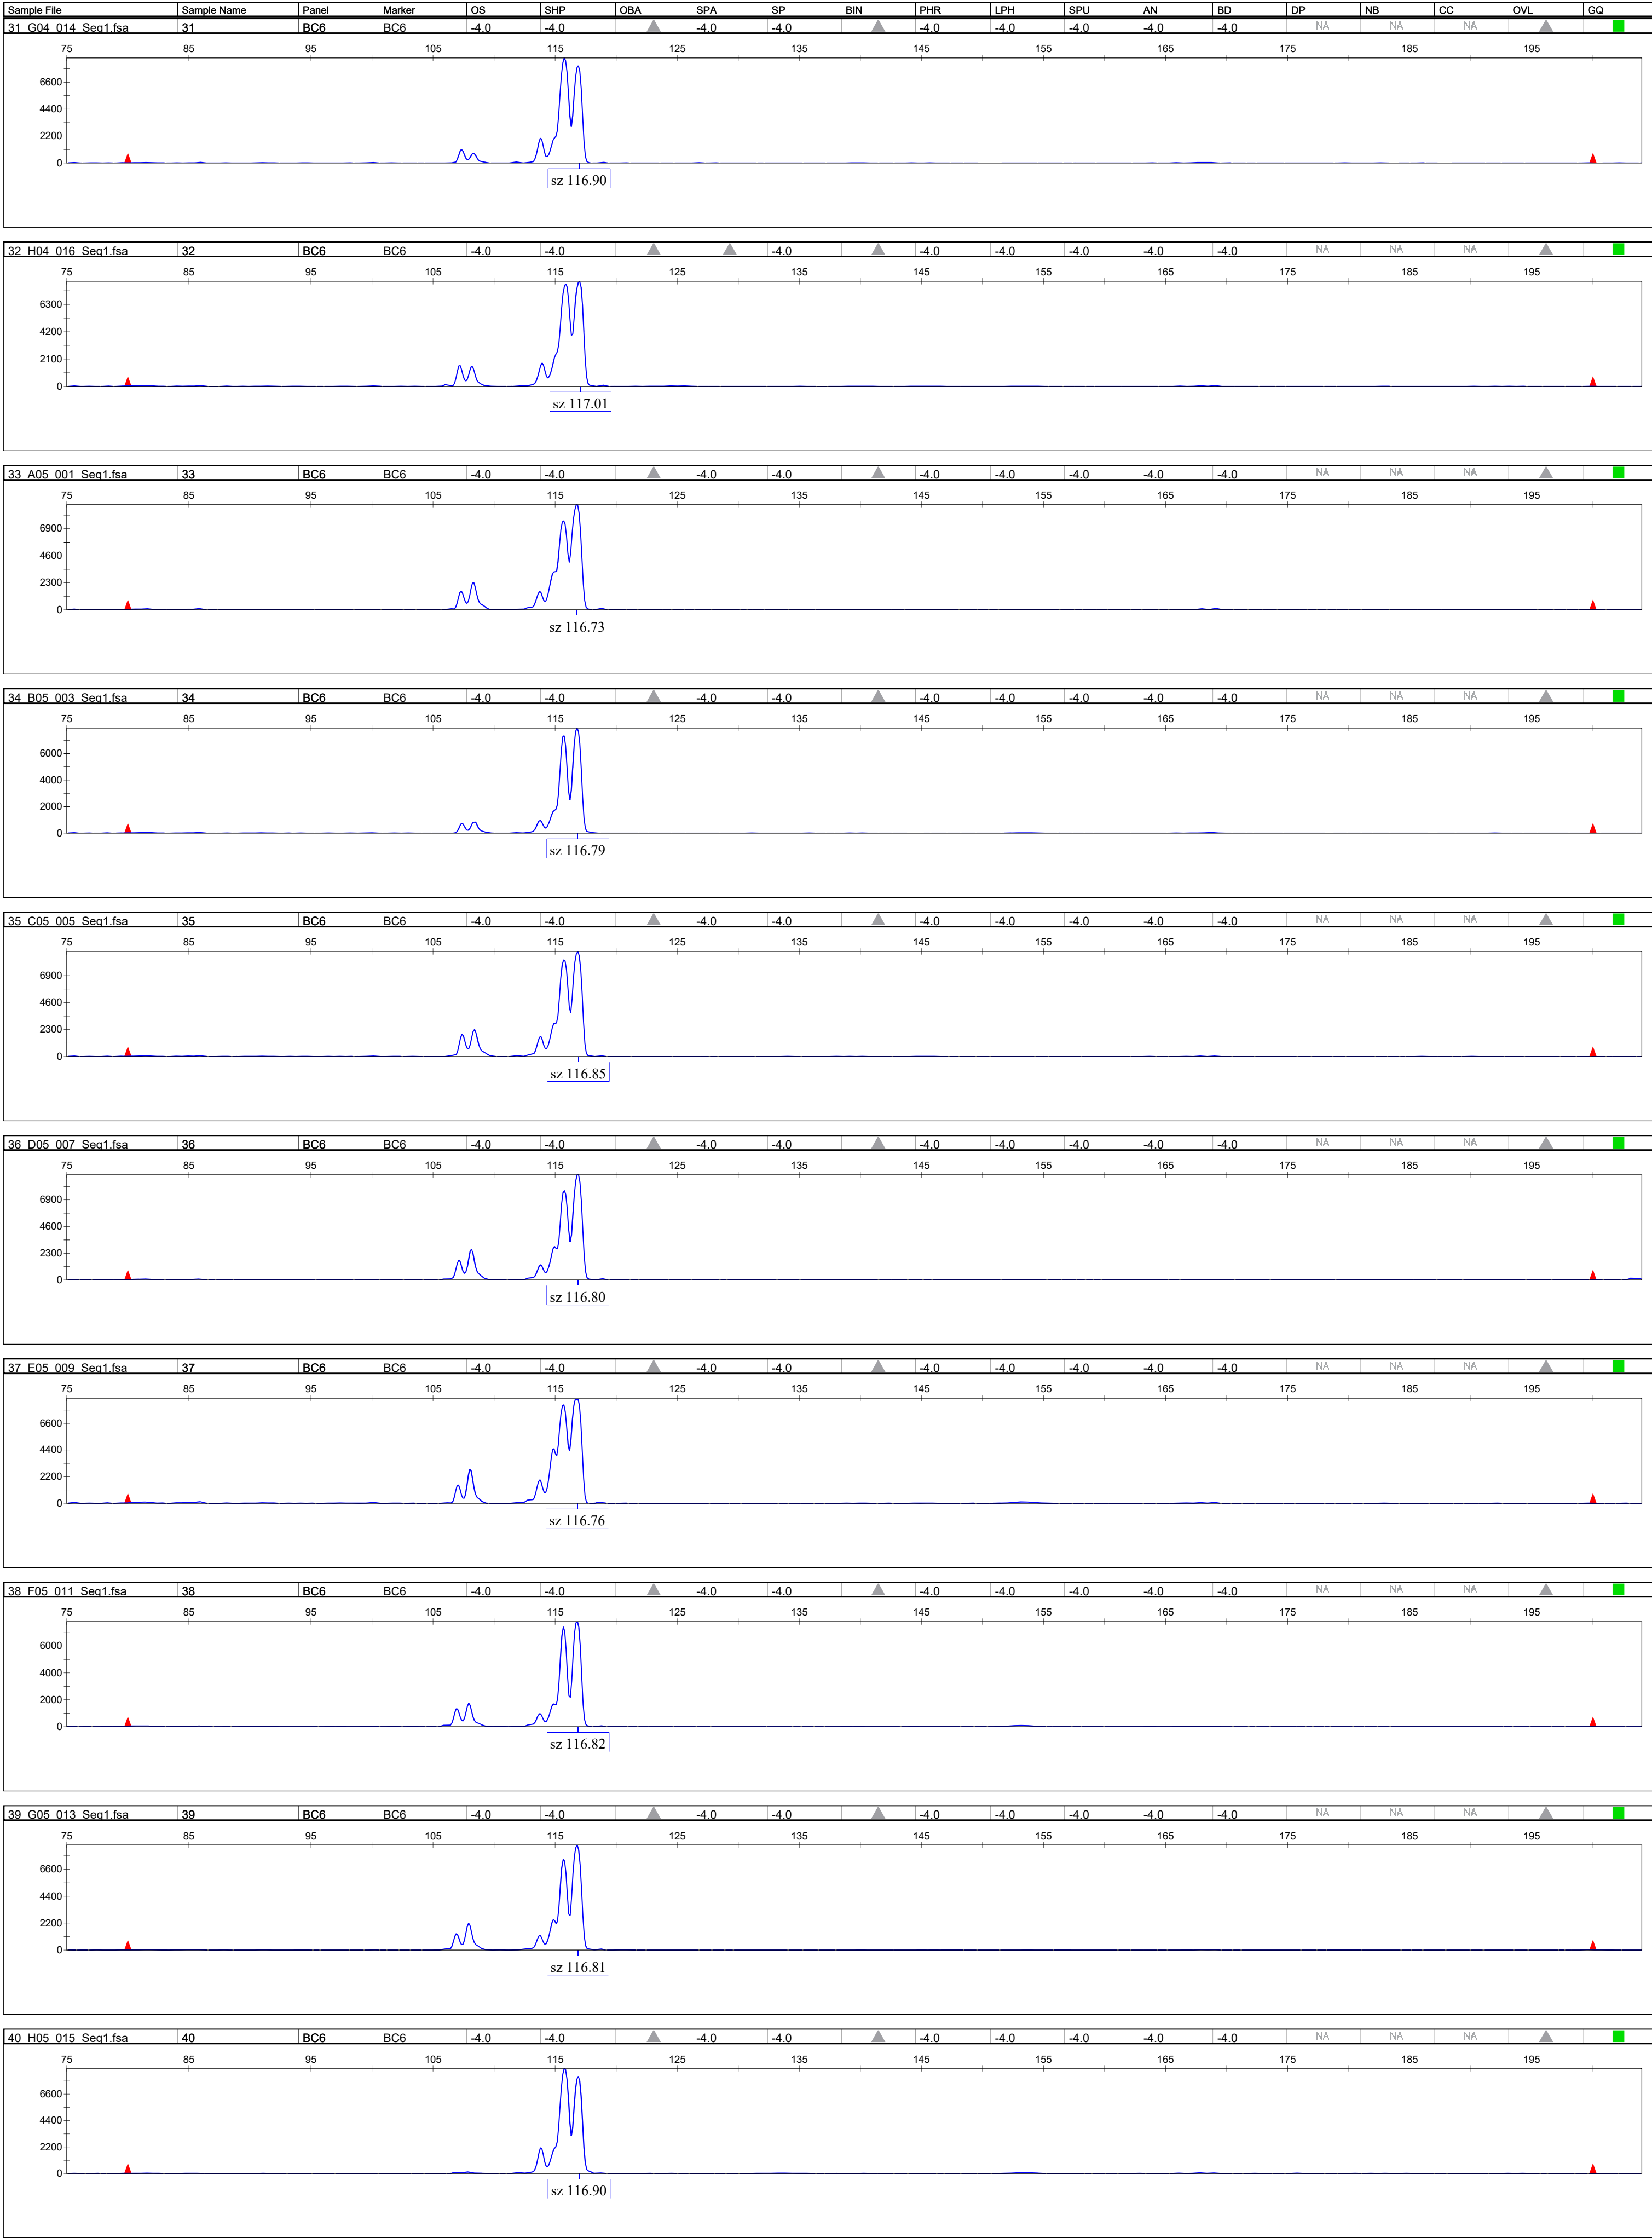

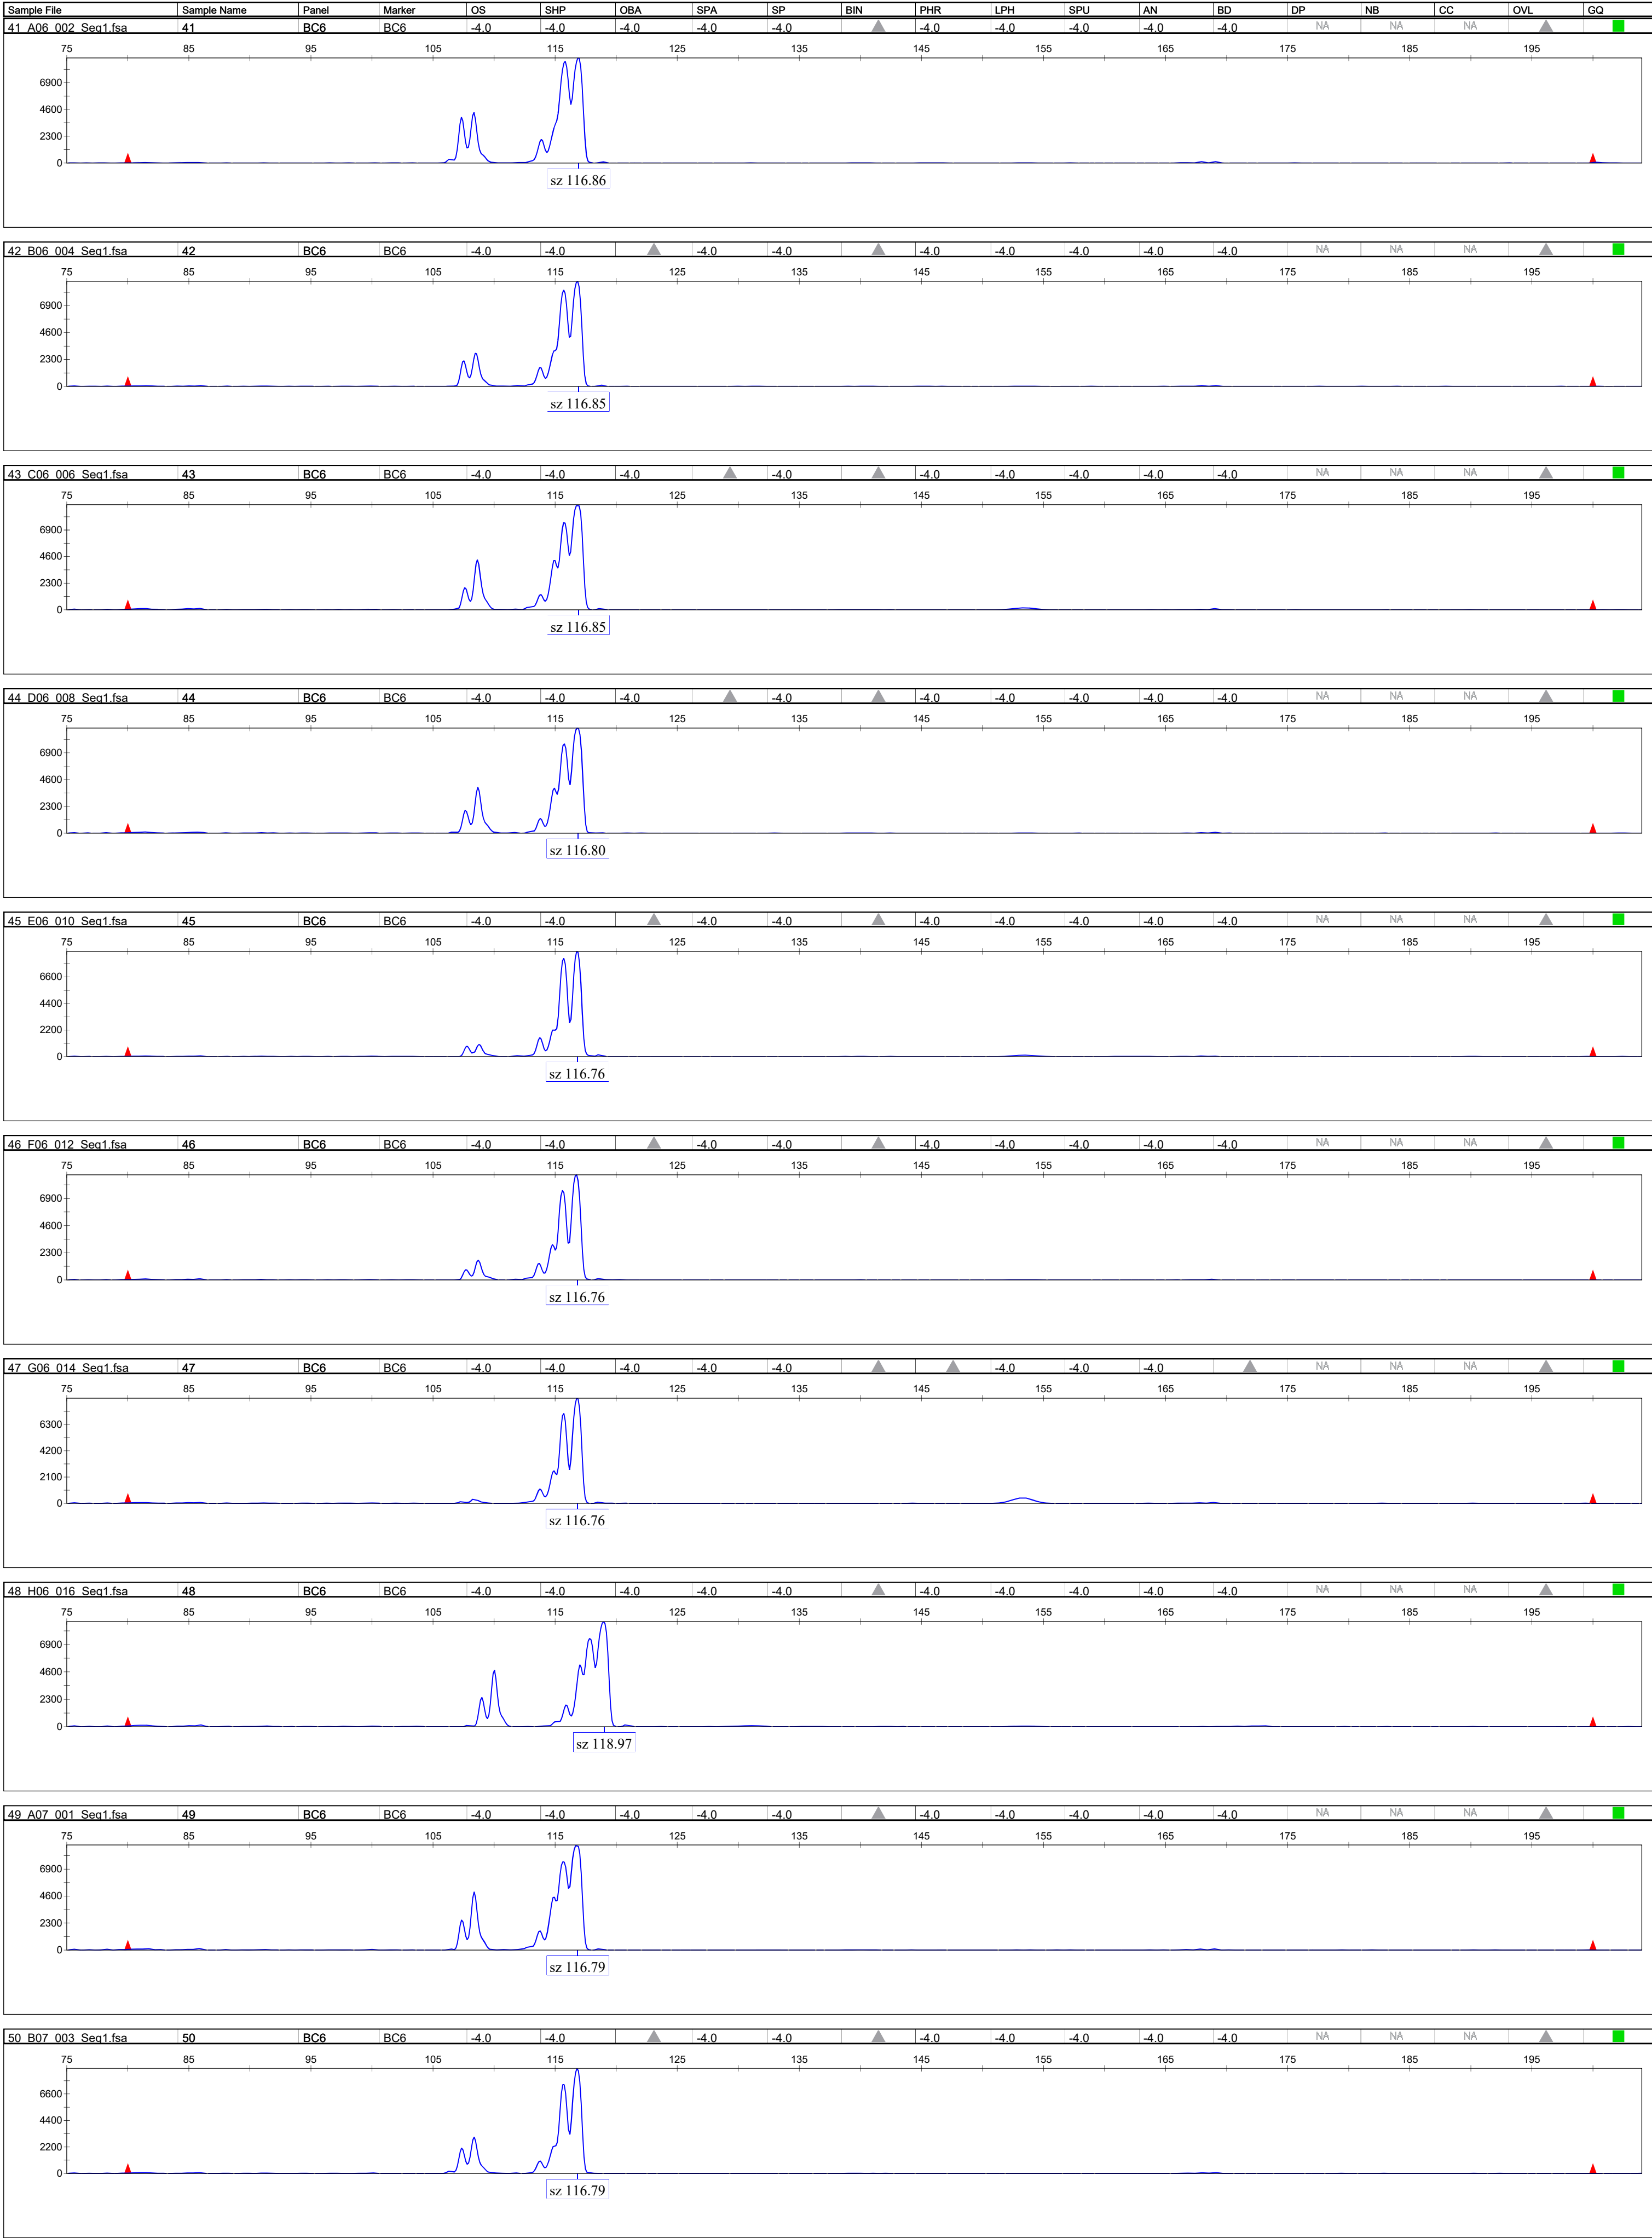

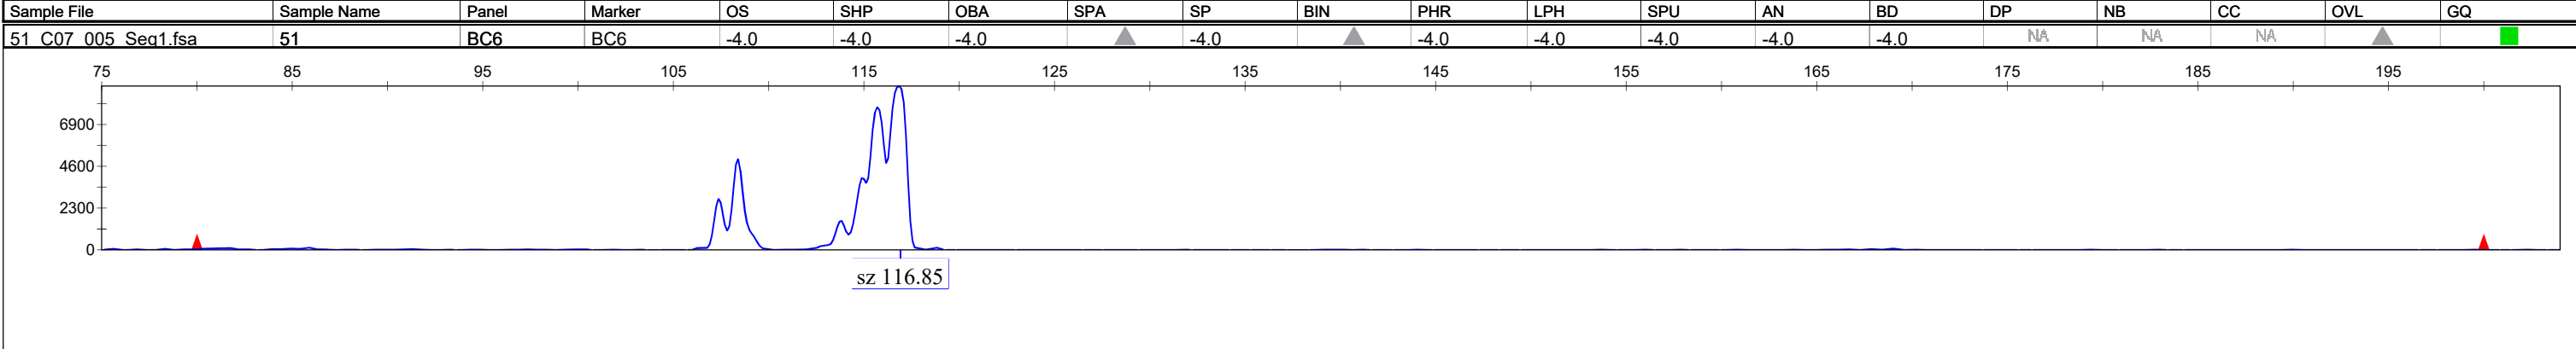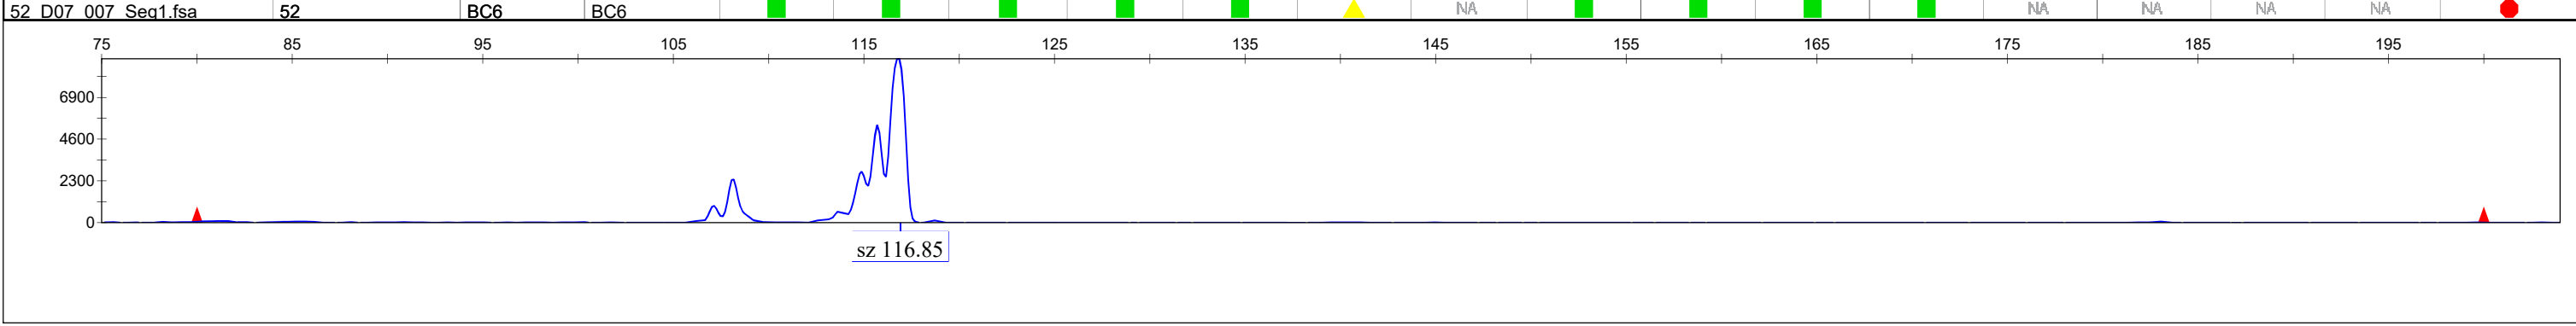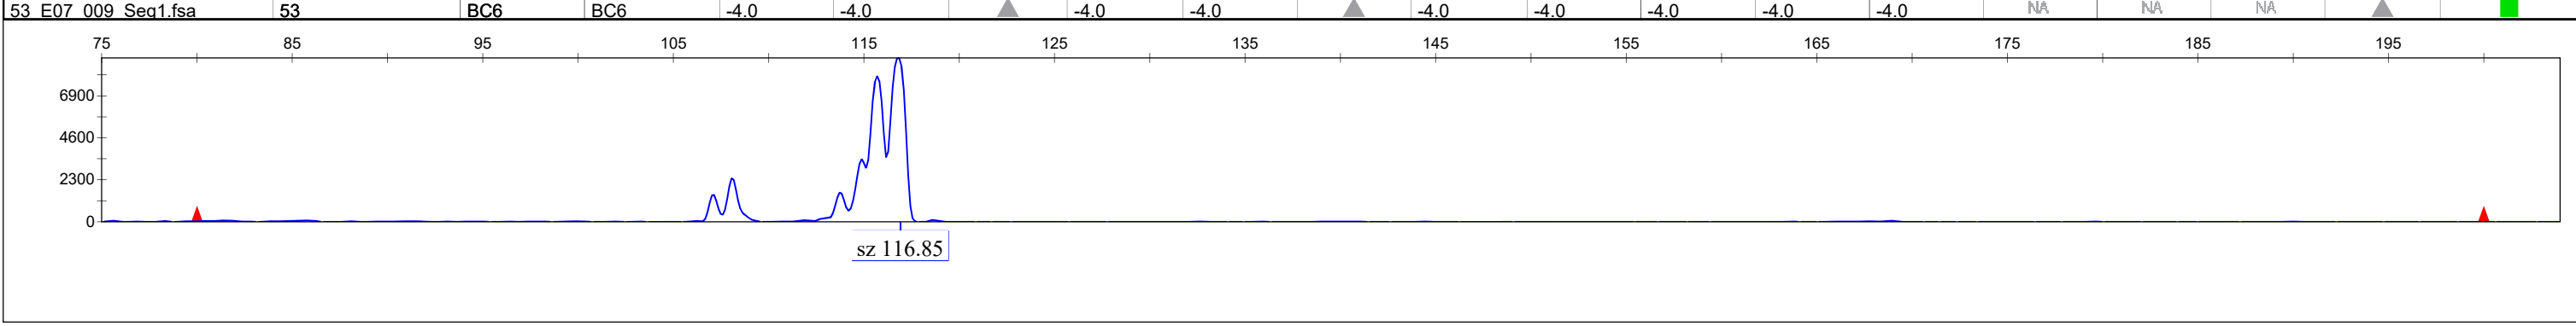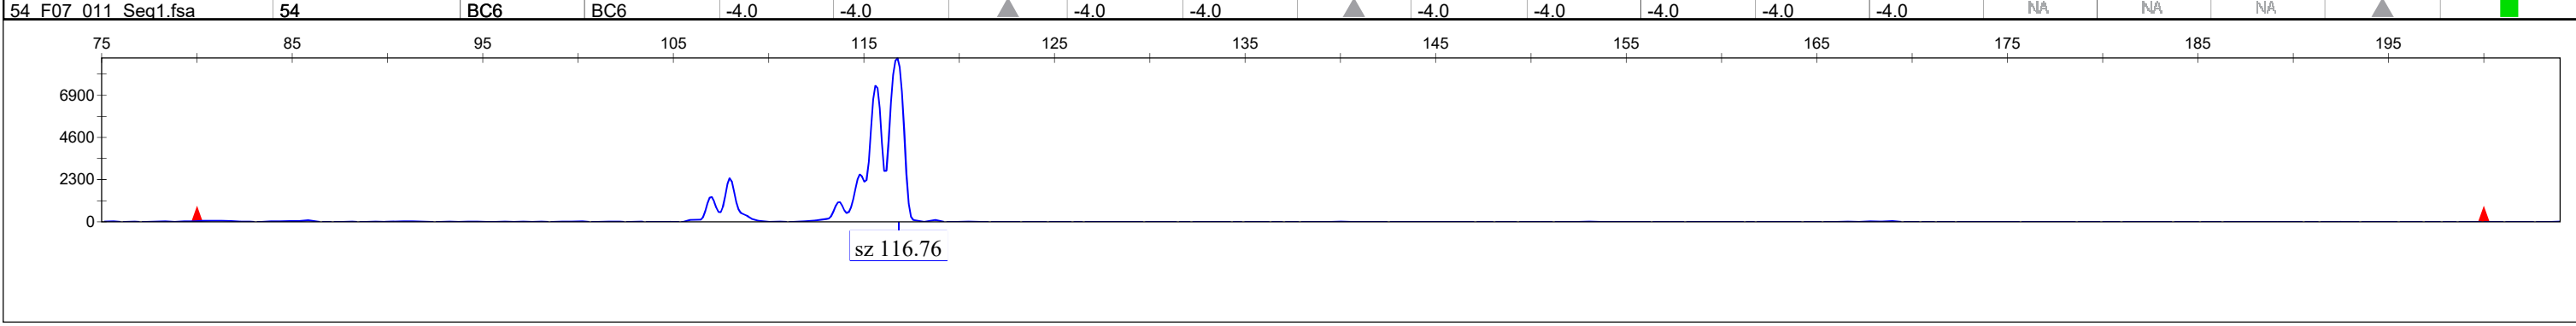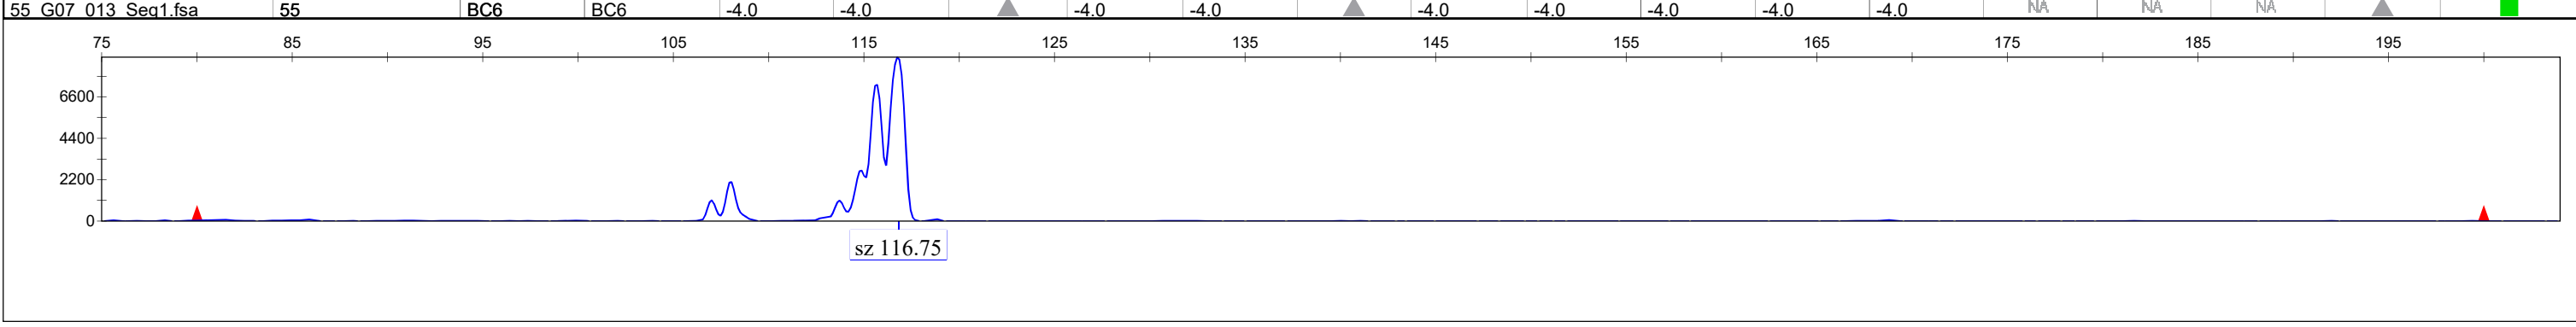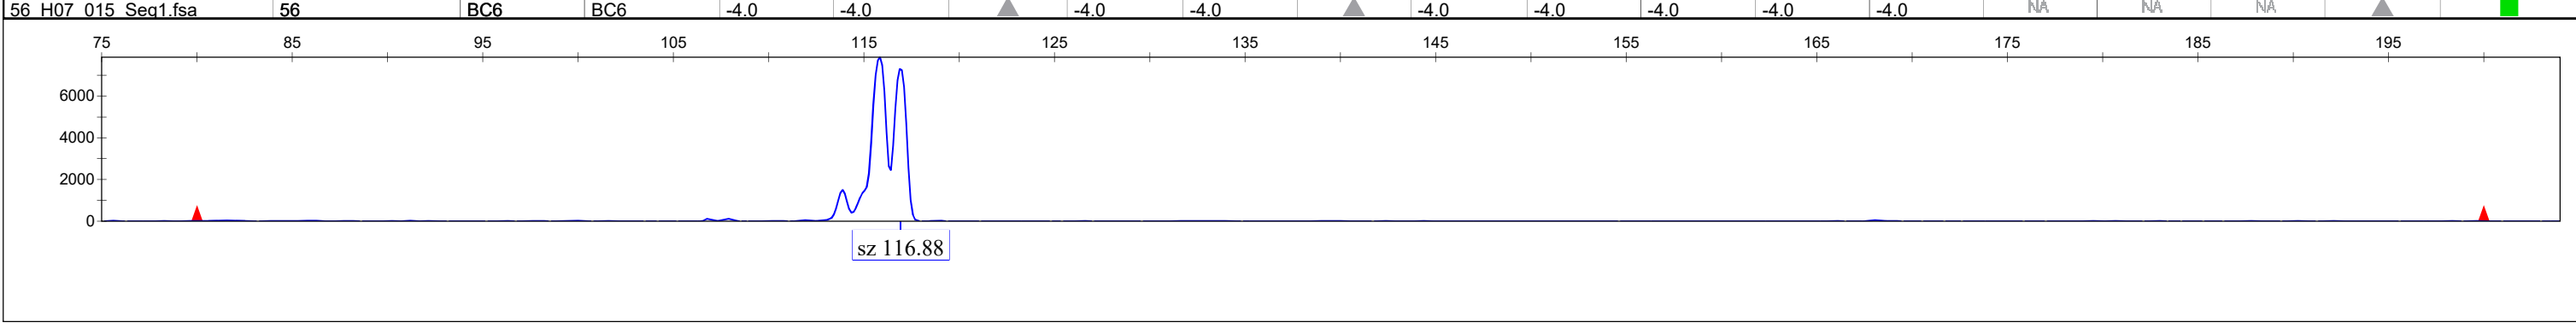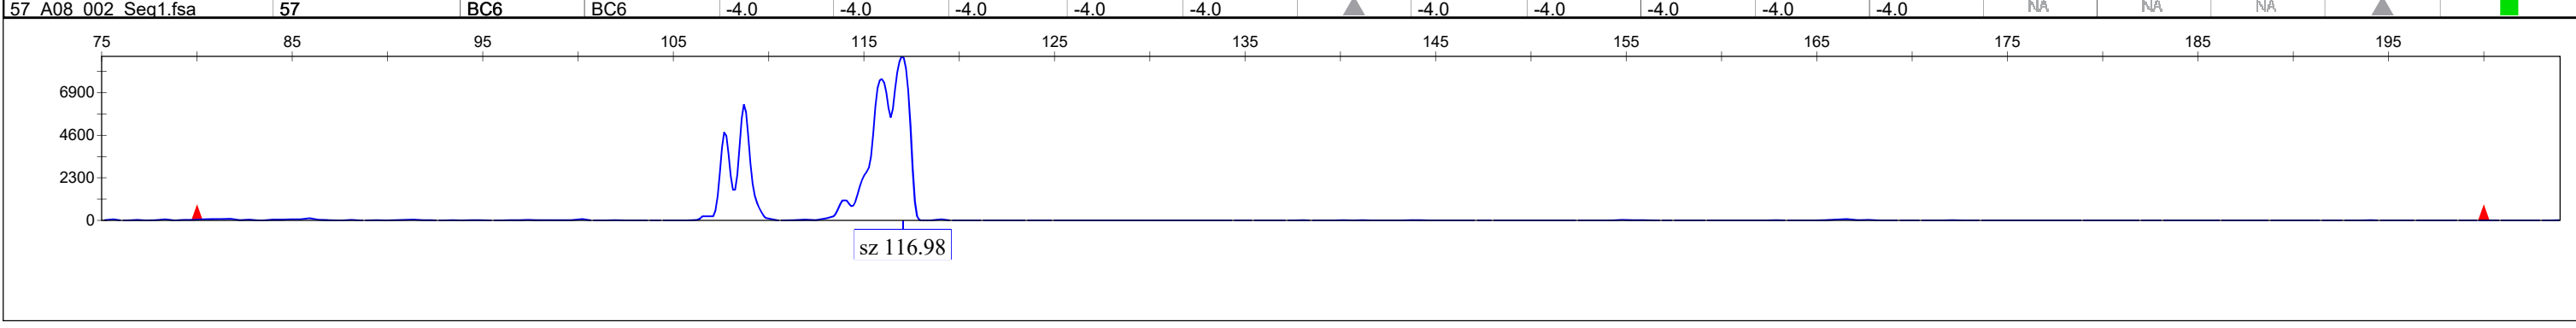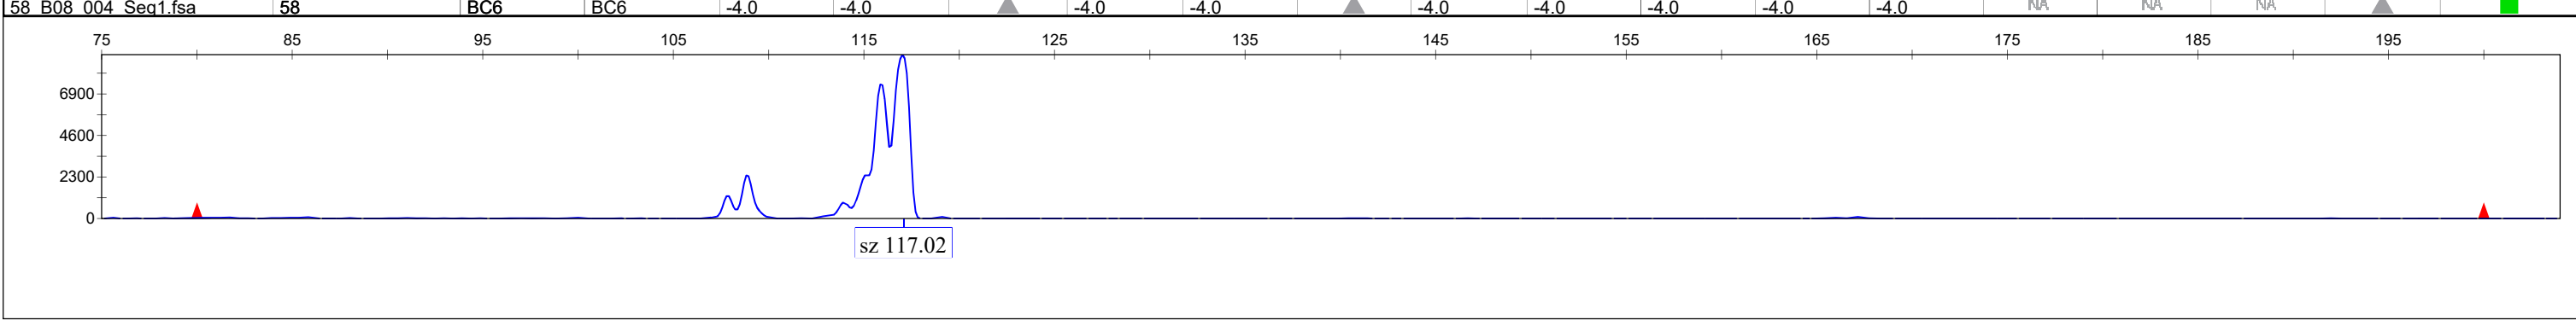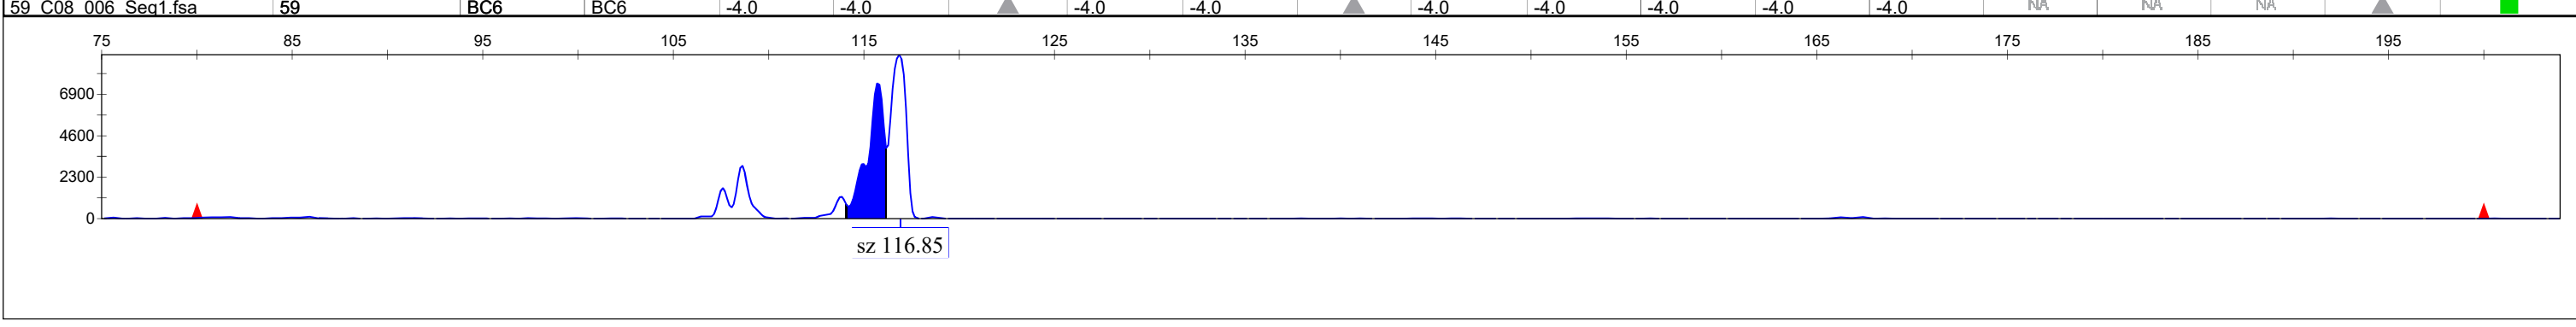

Supplement: s1 [file s1]

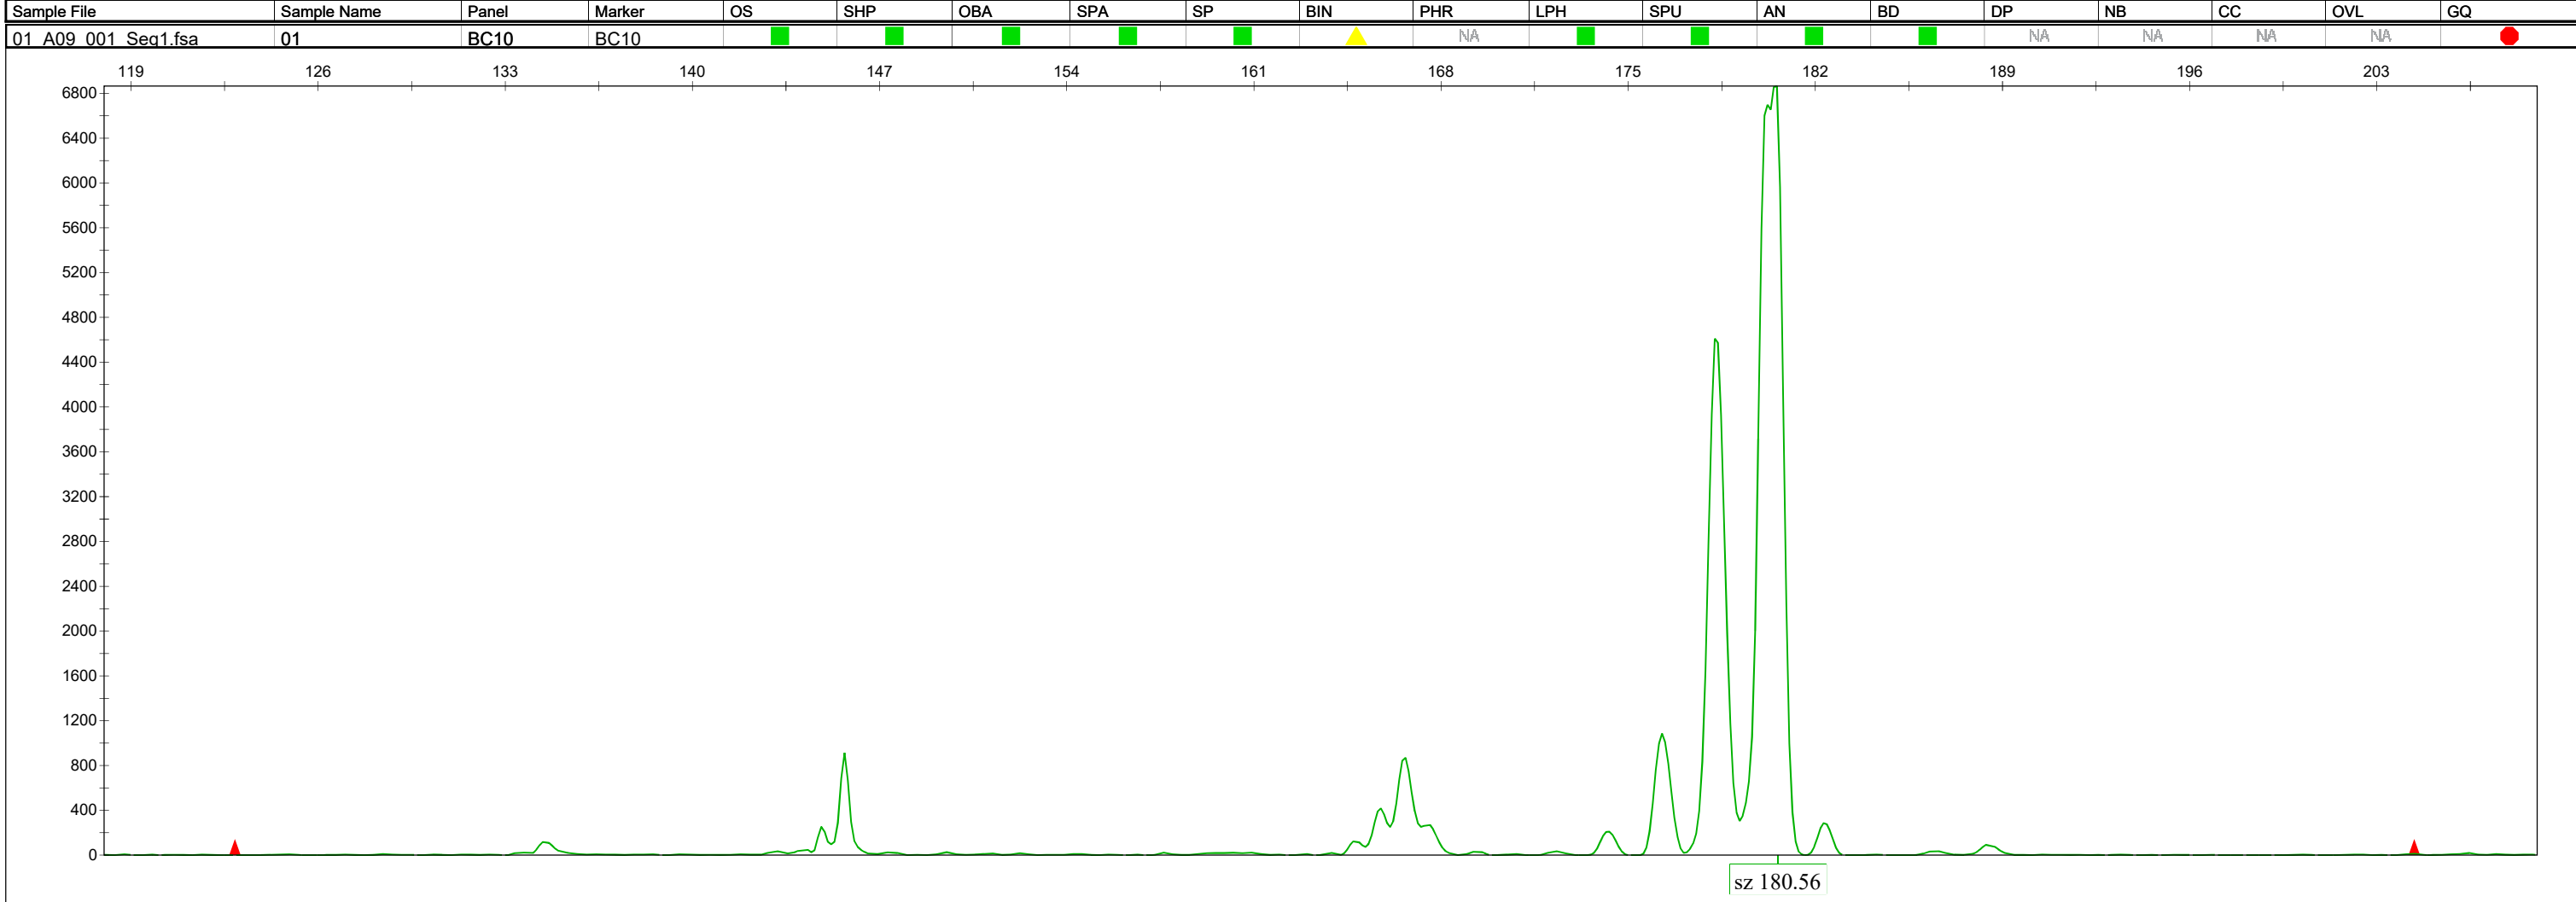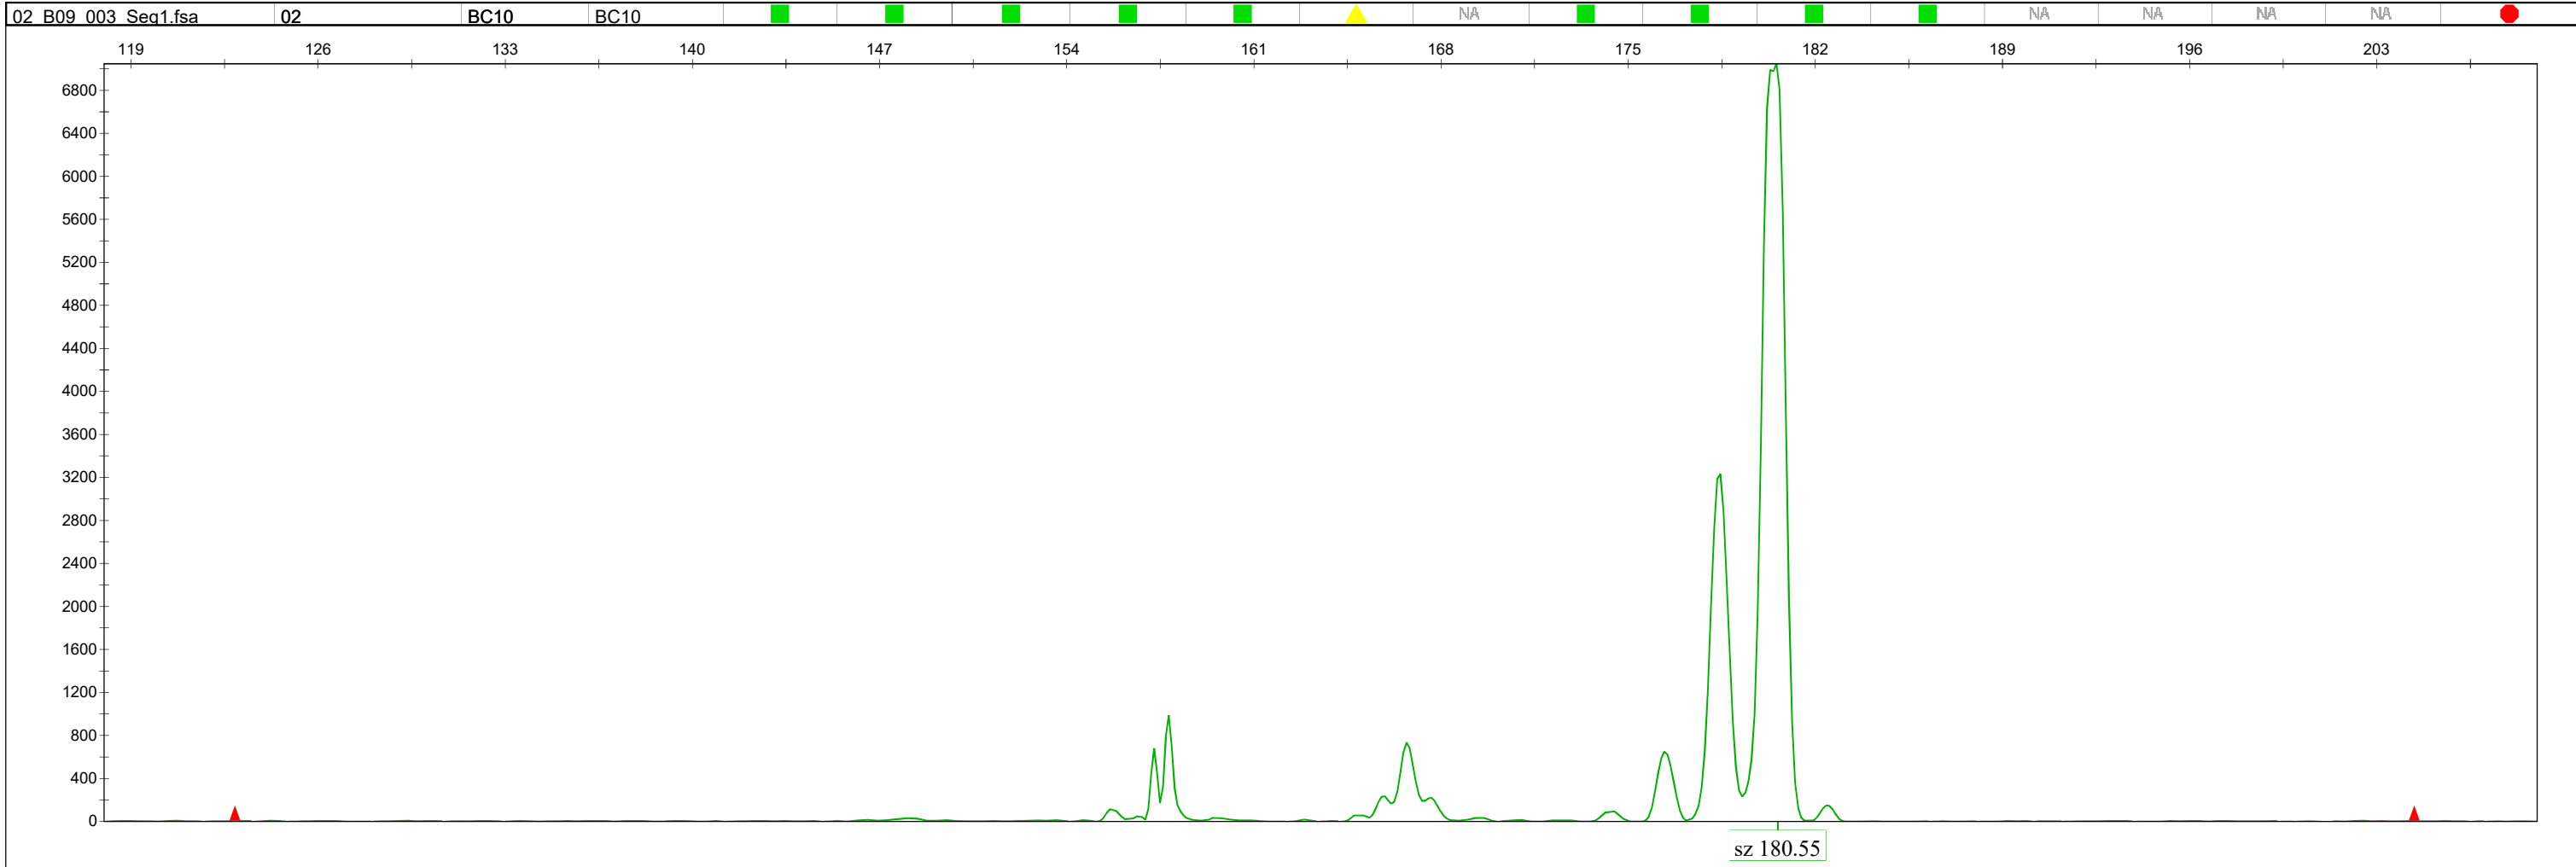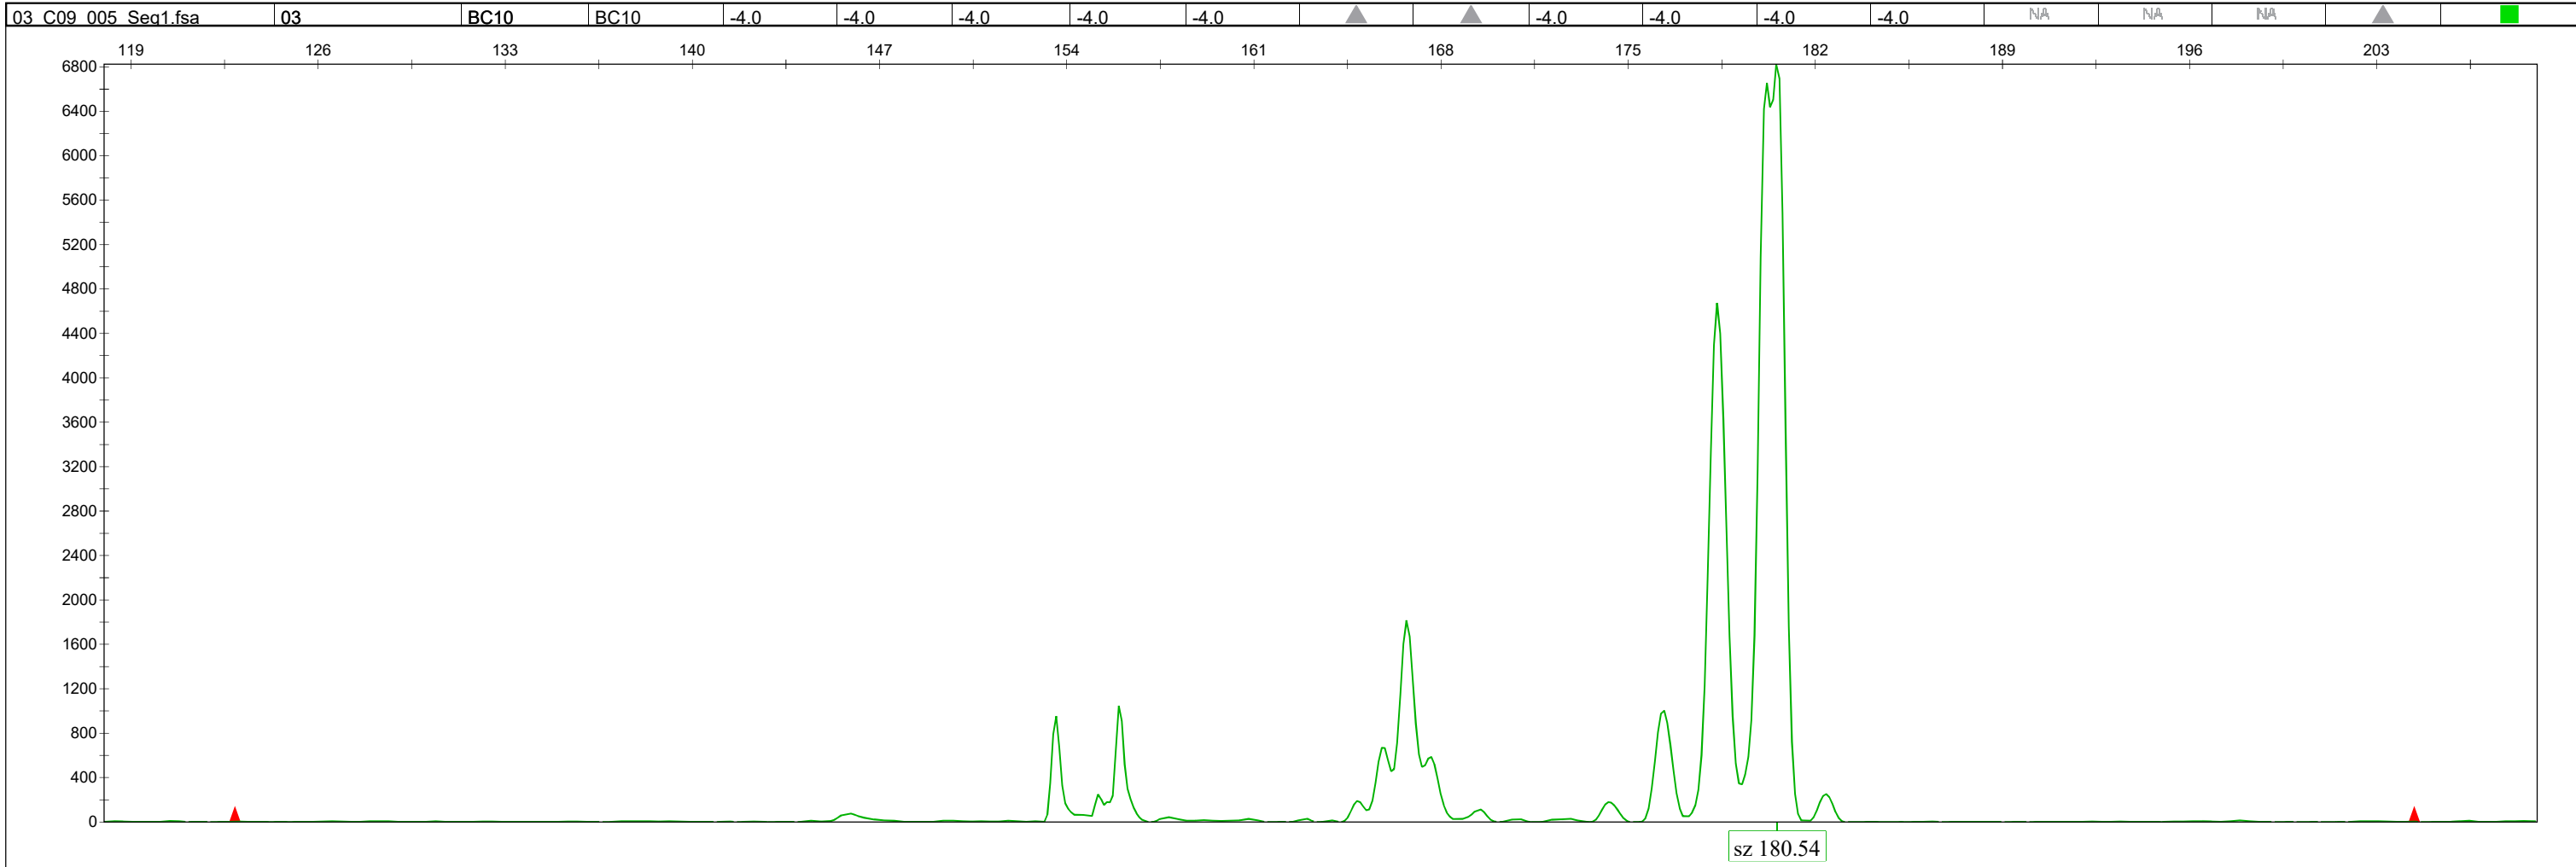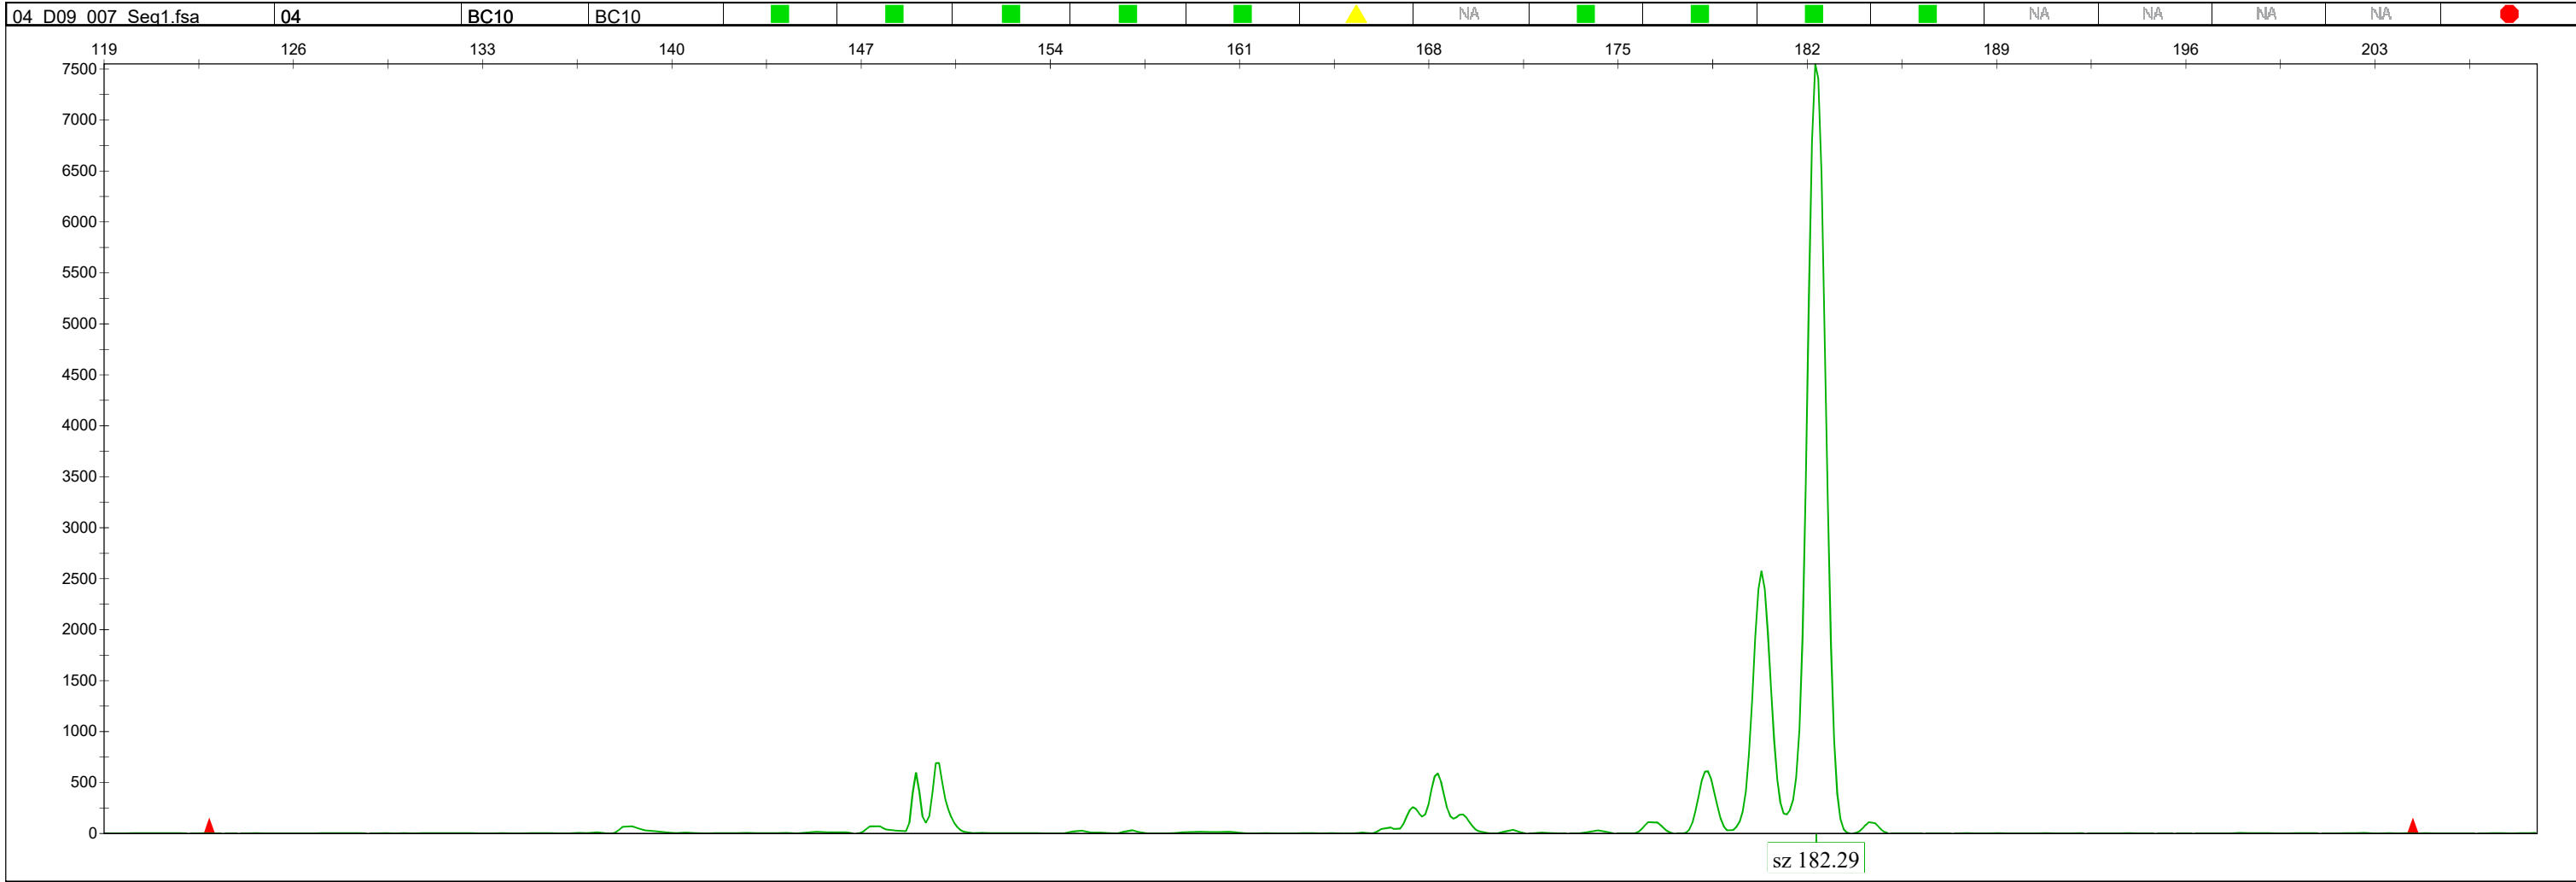

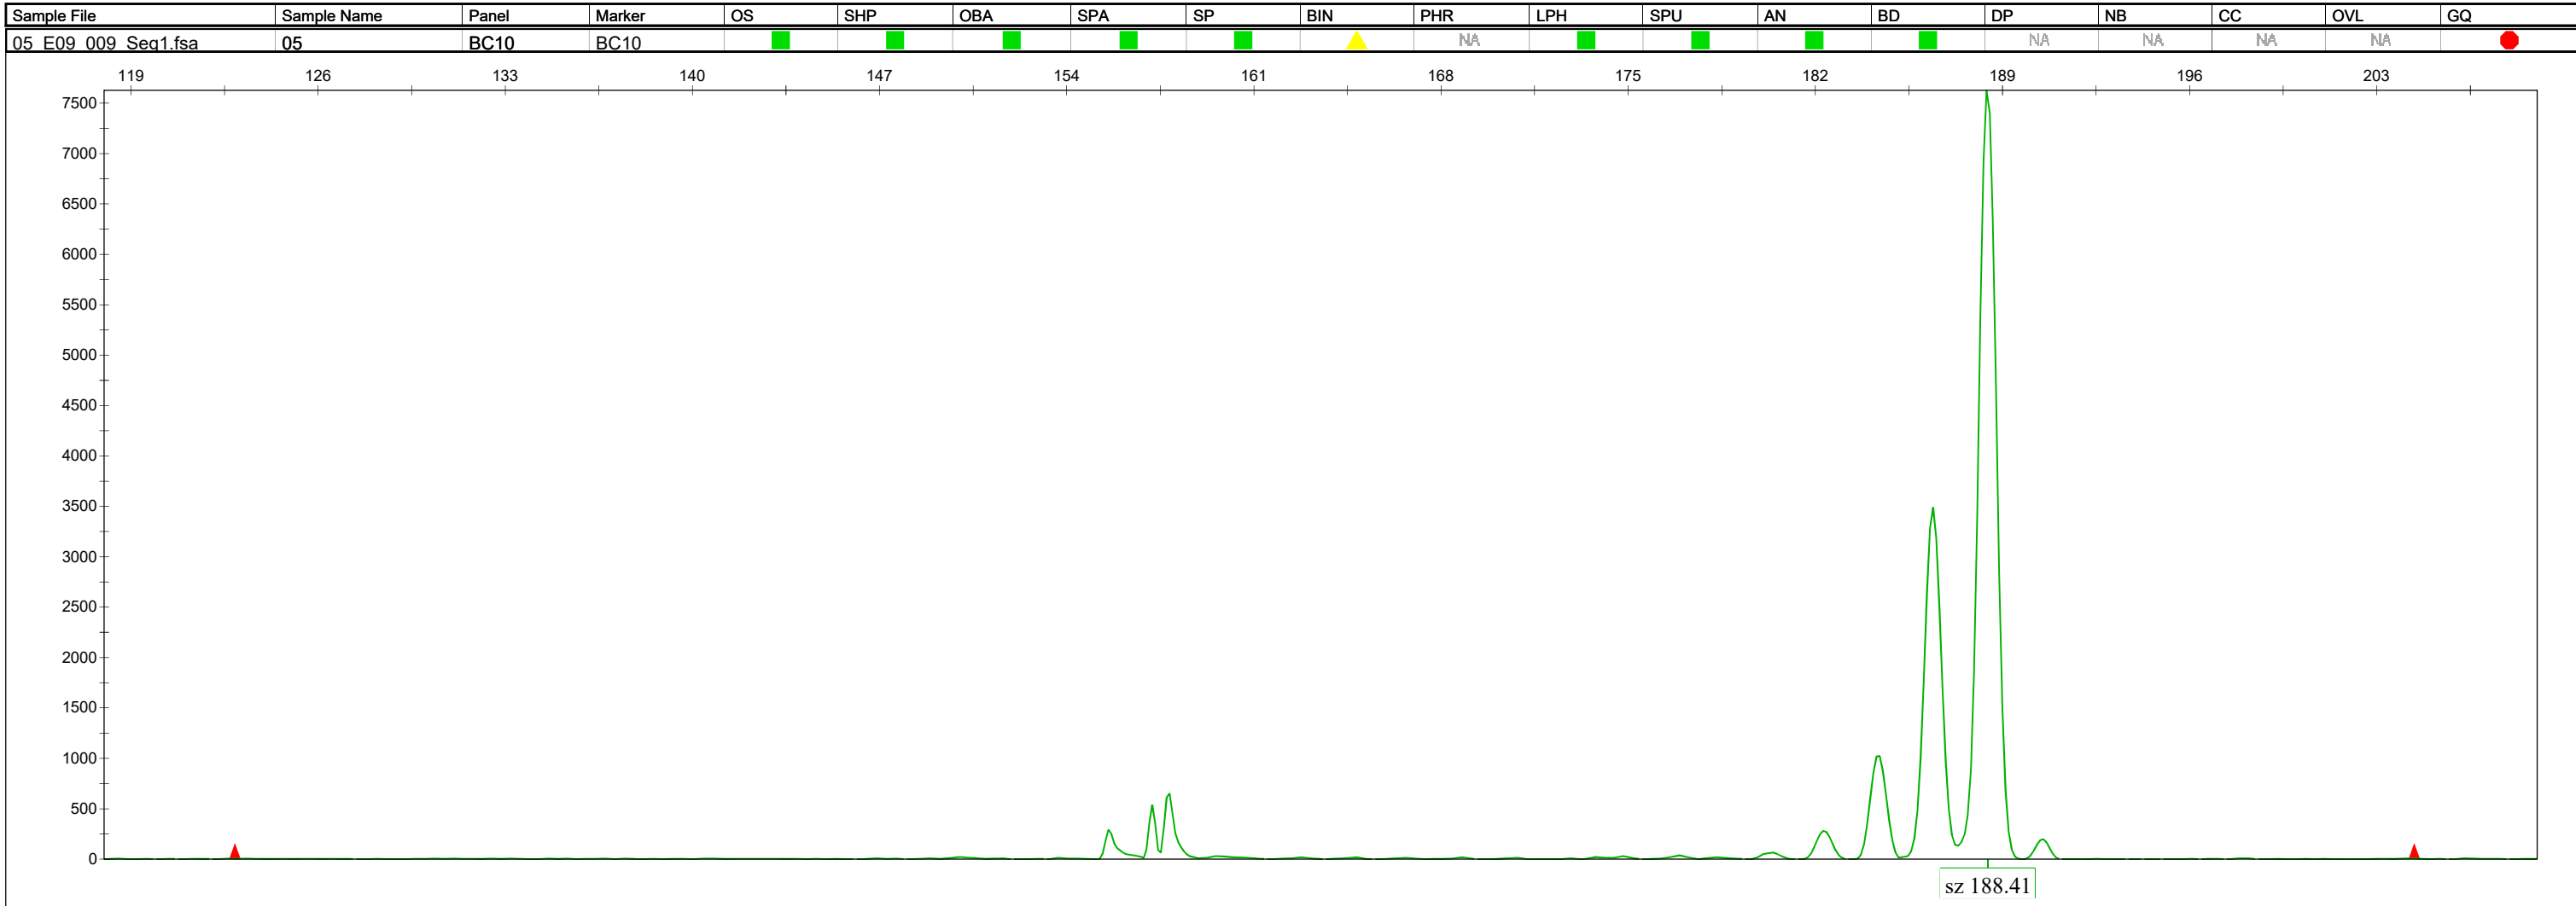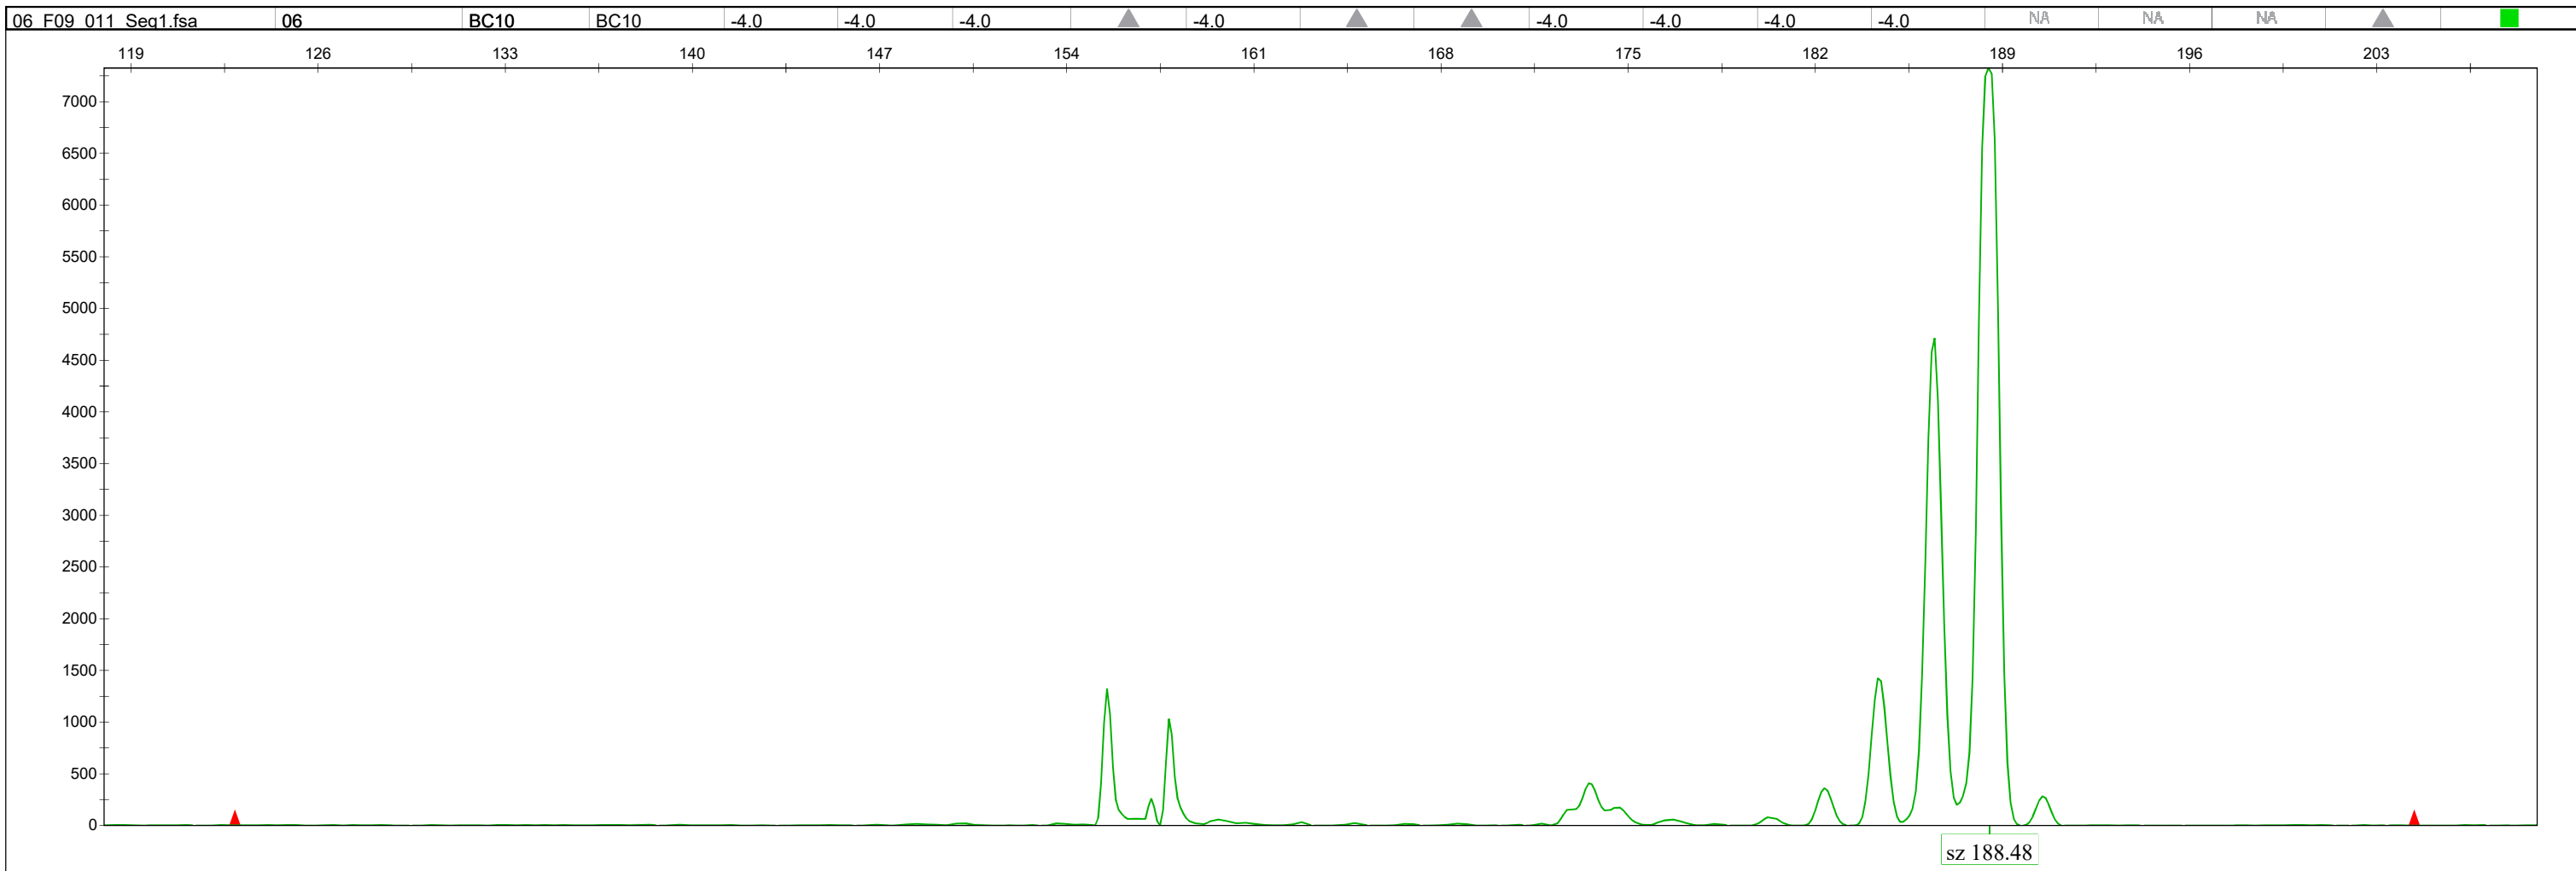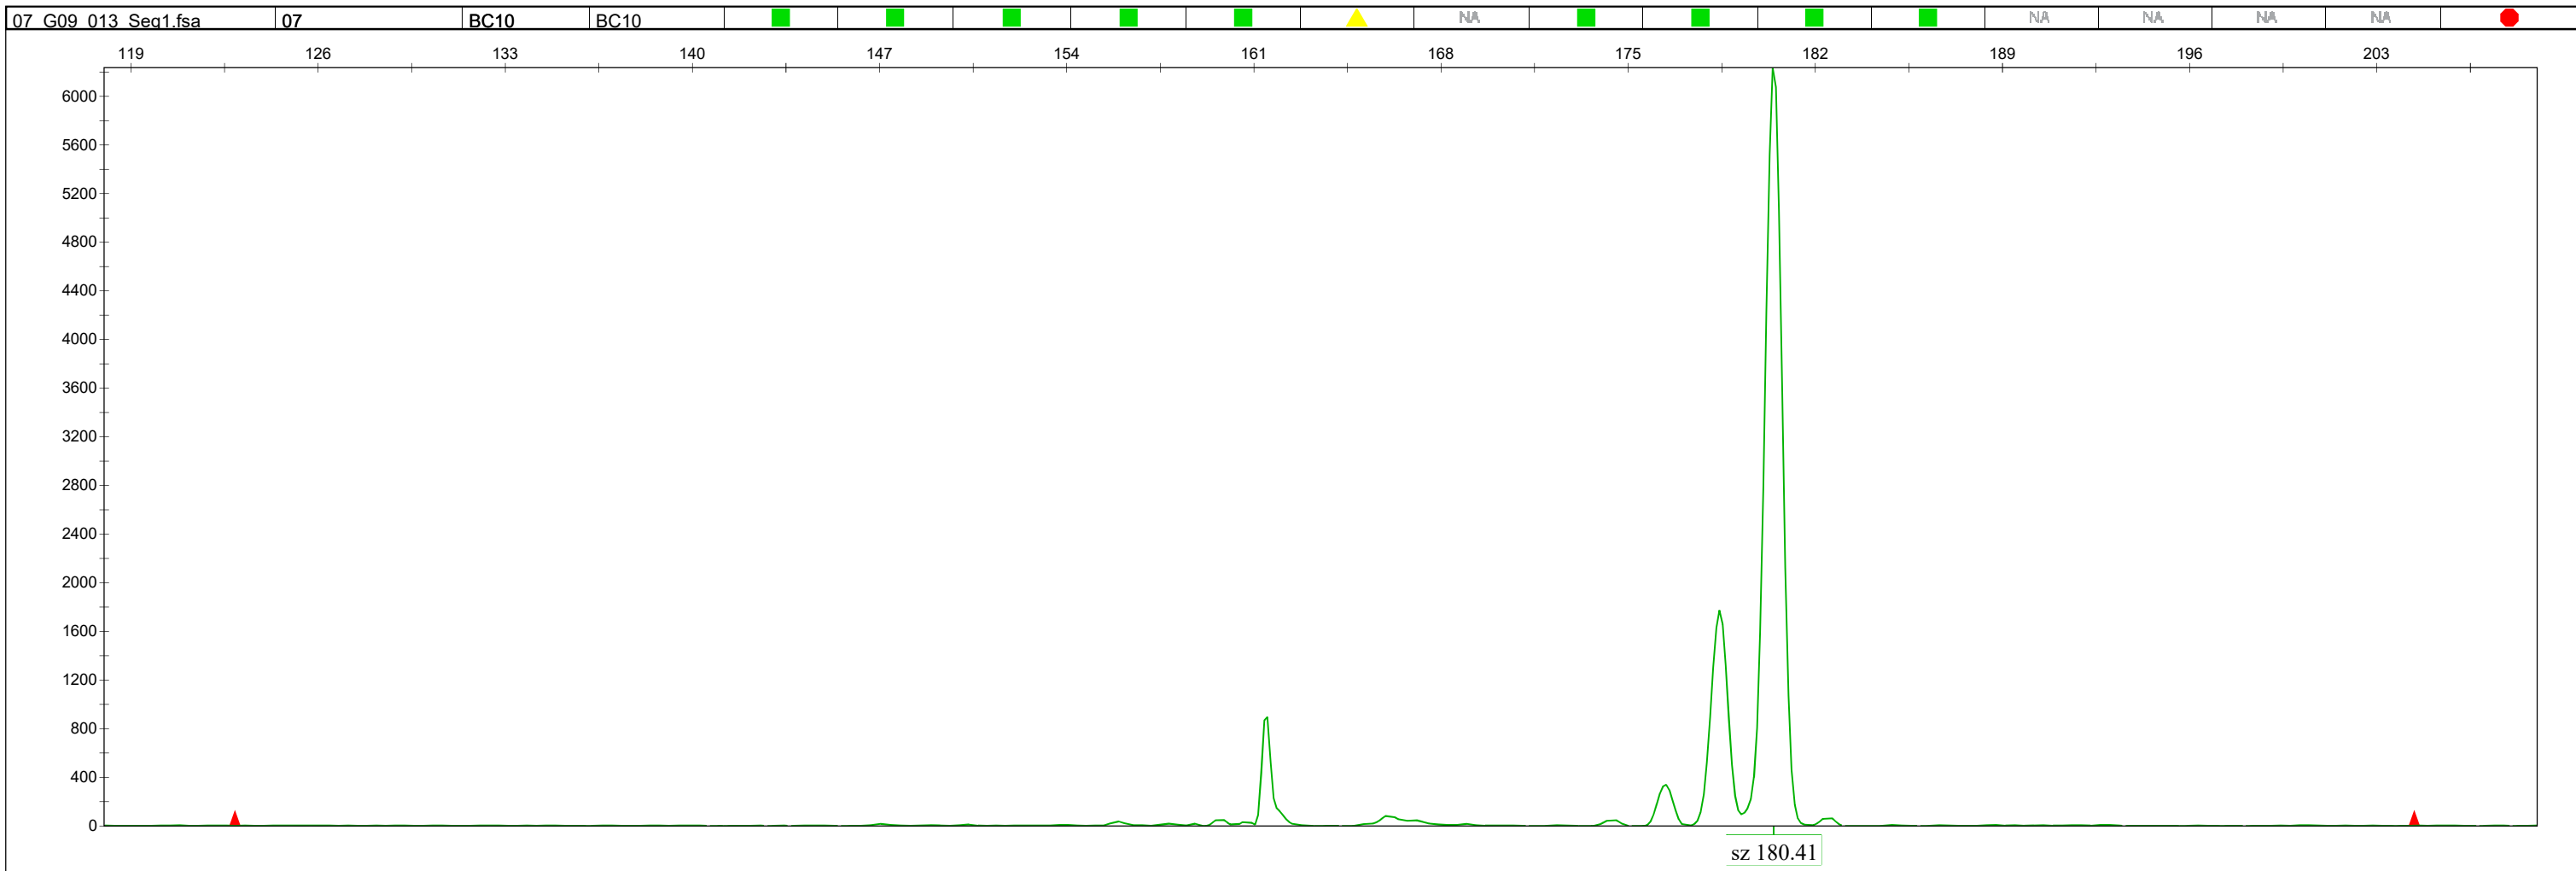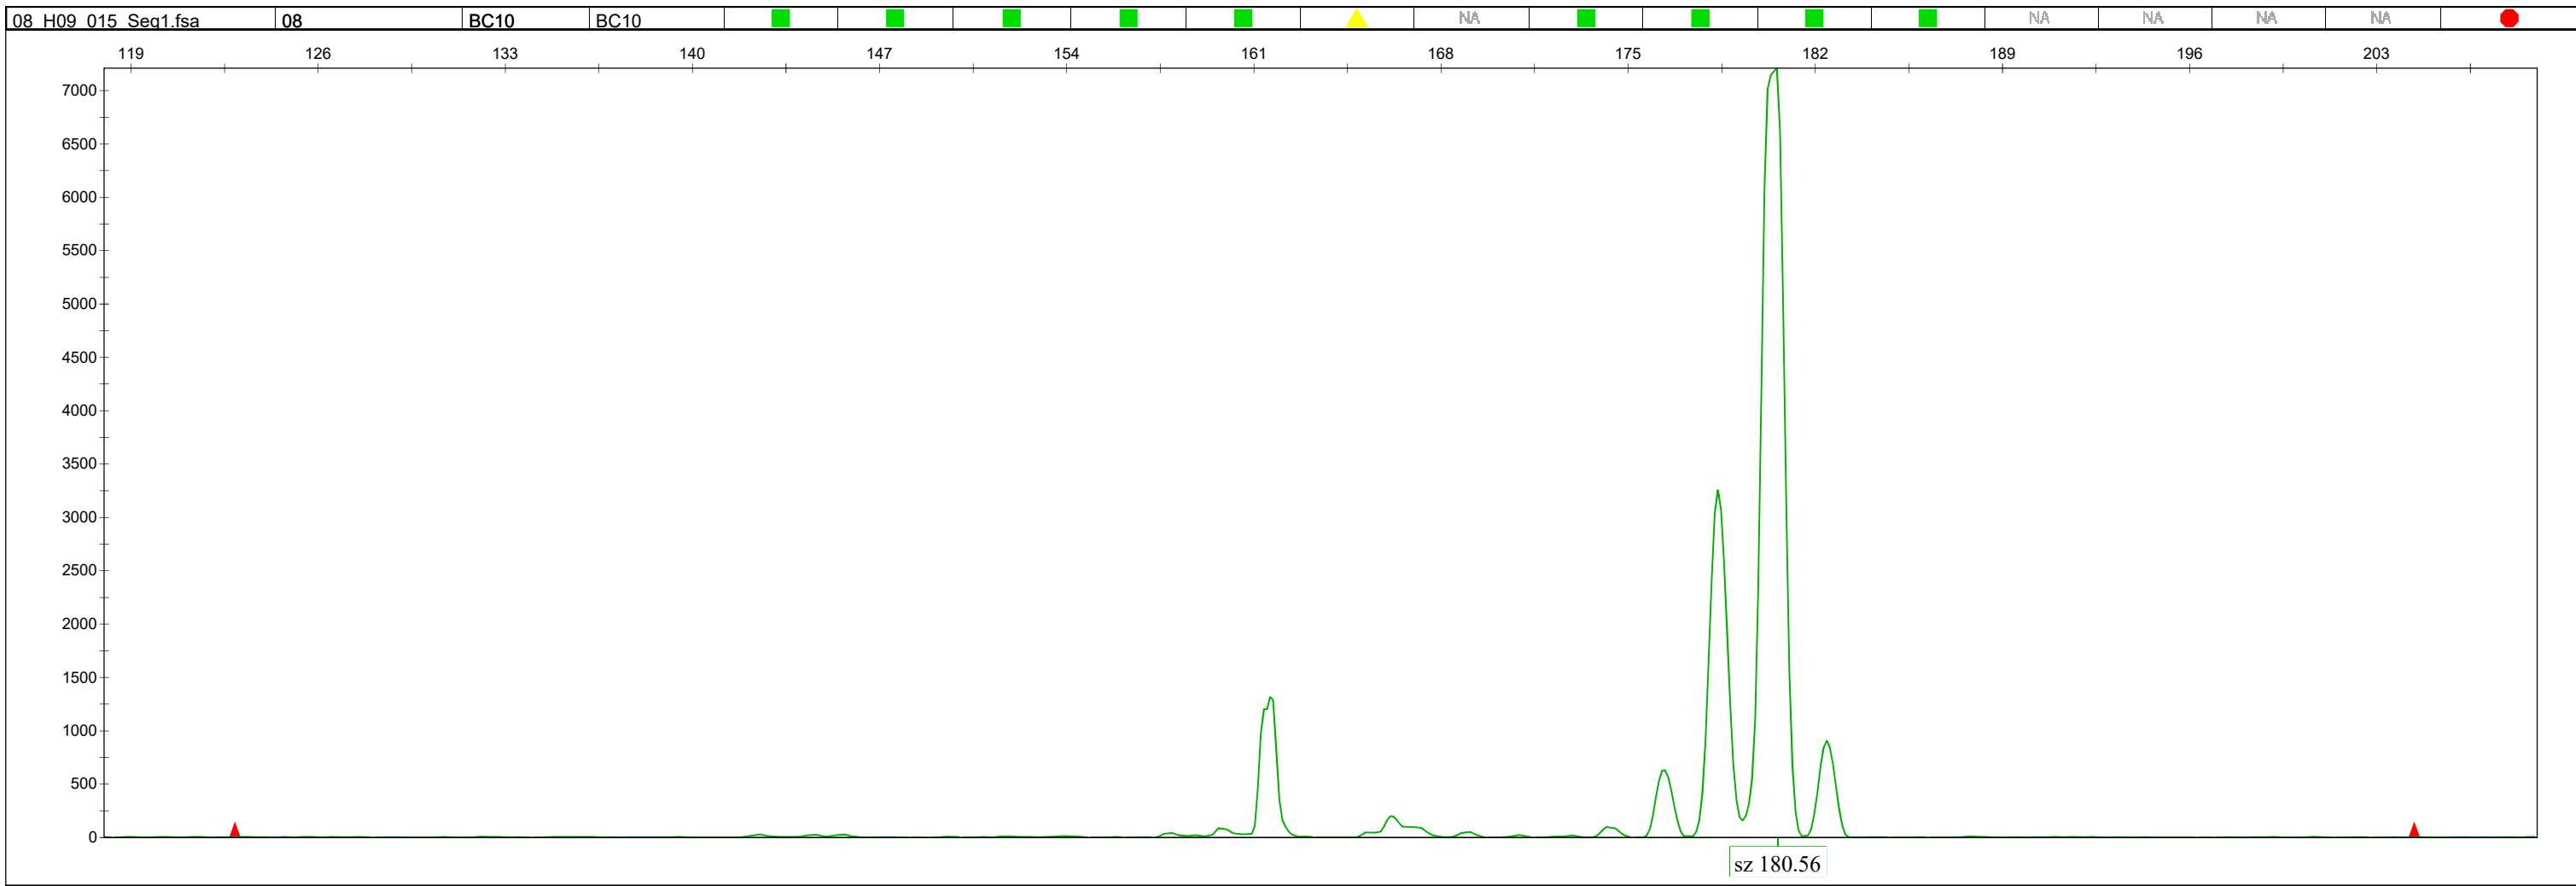

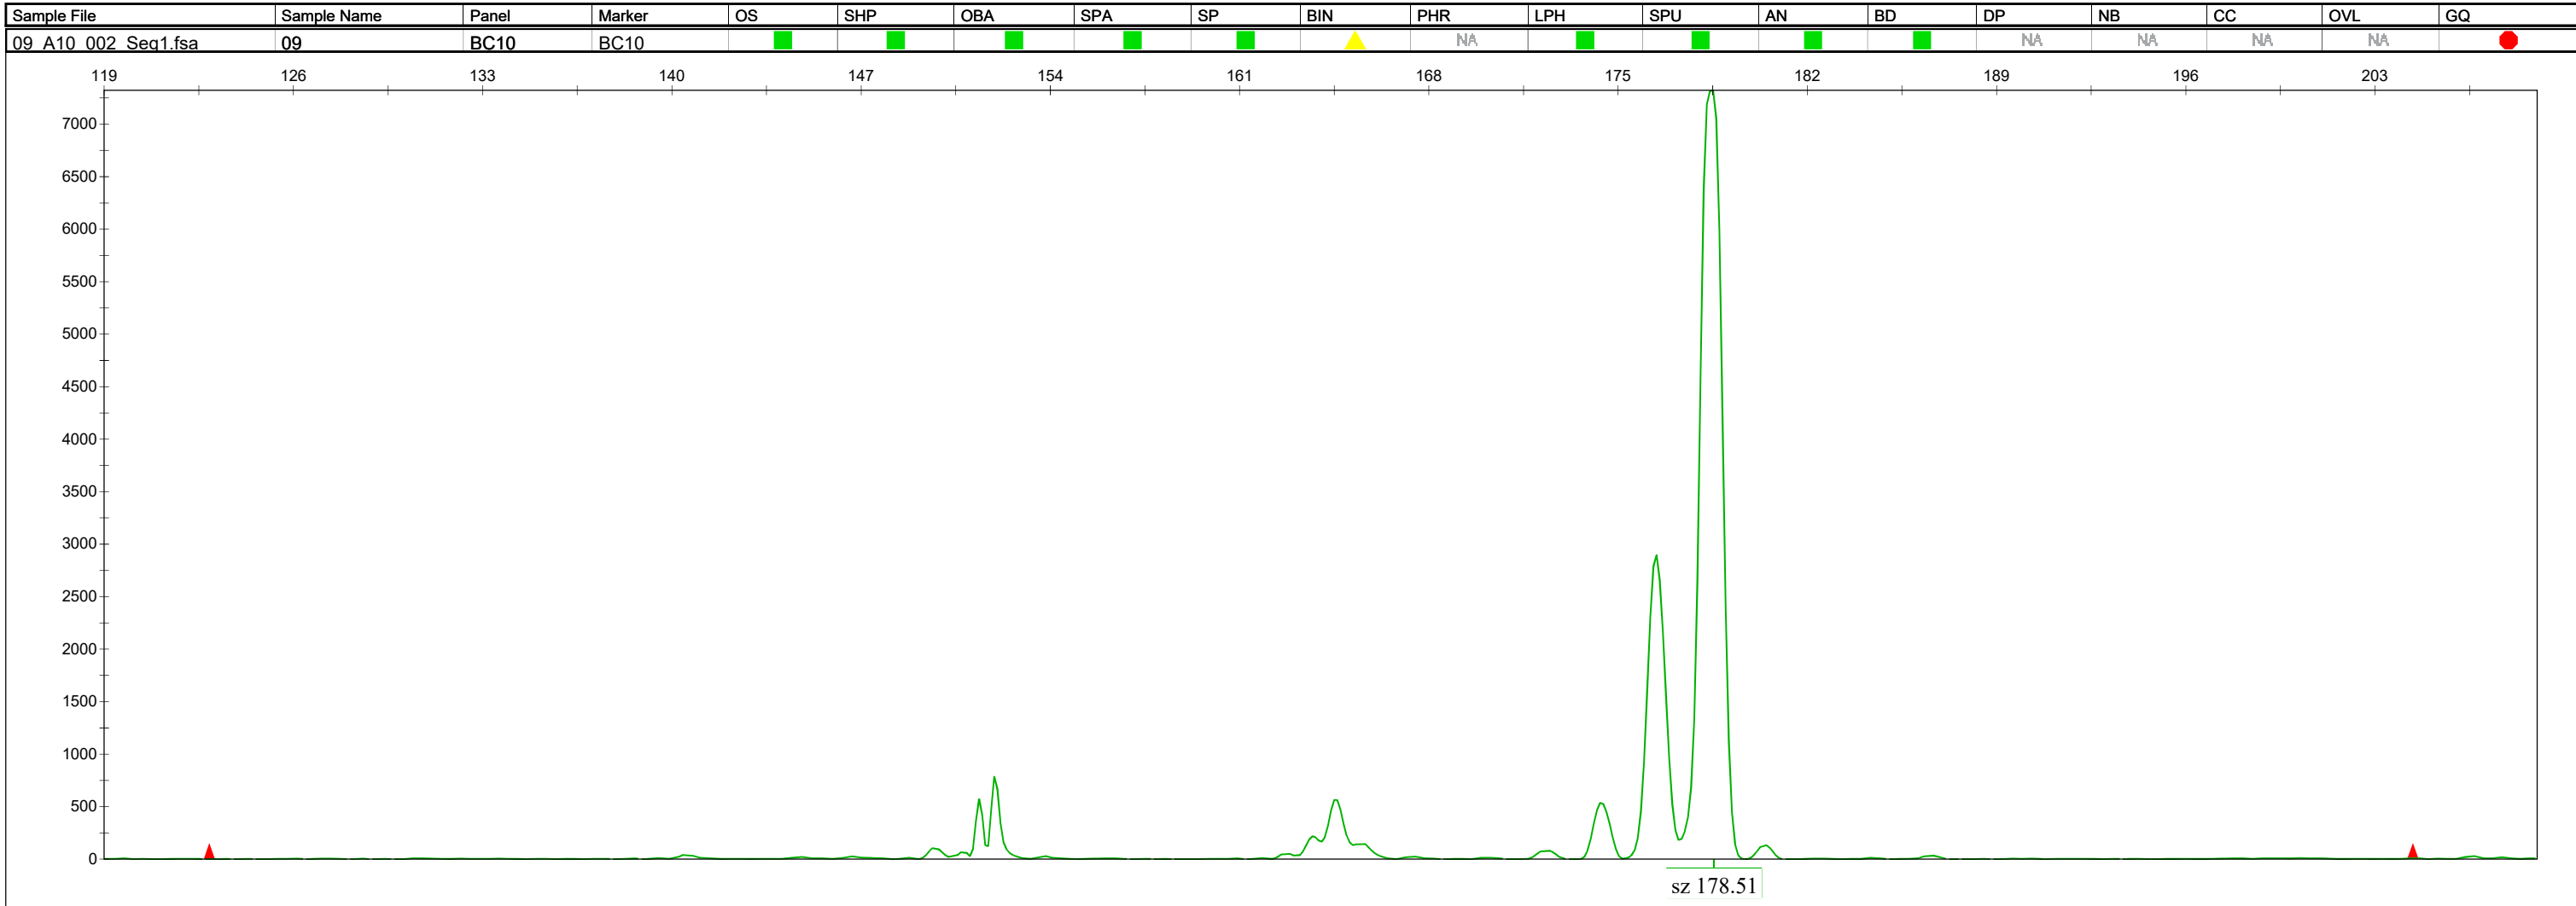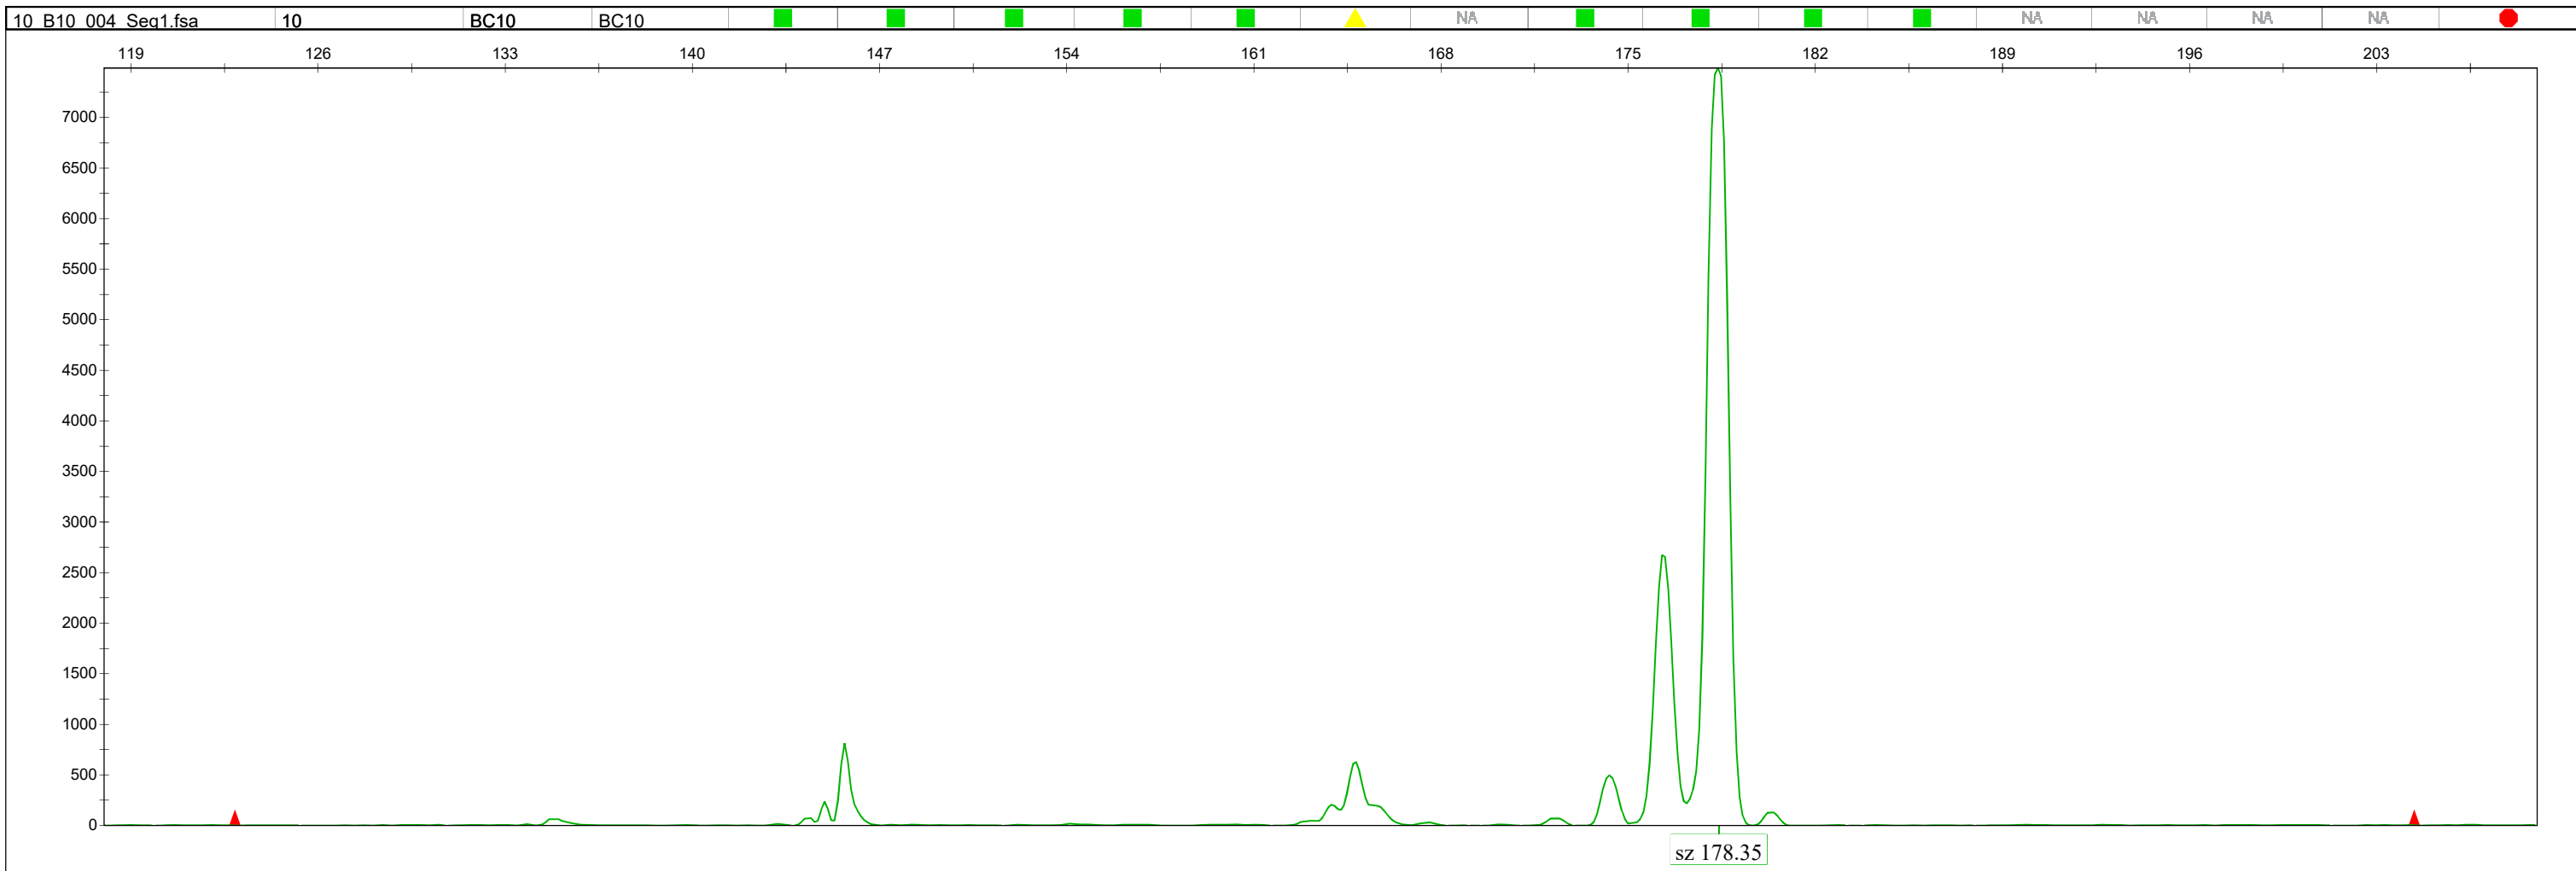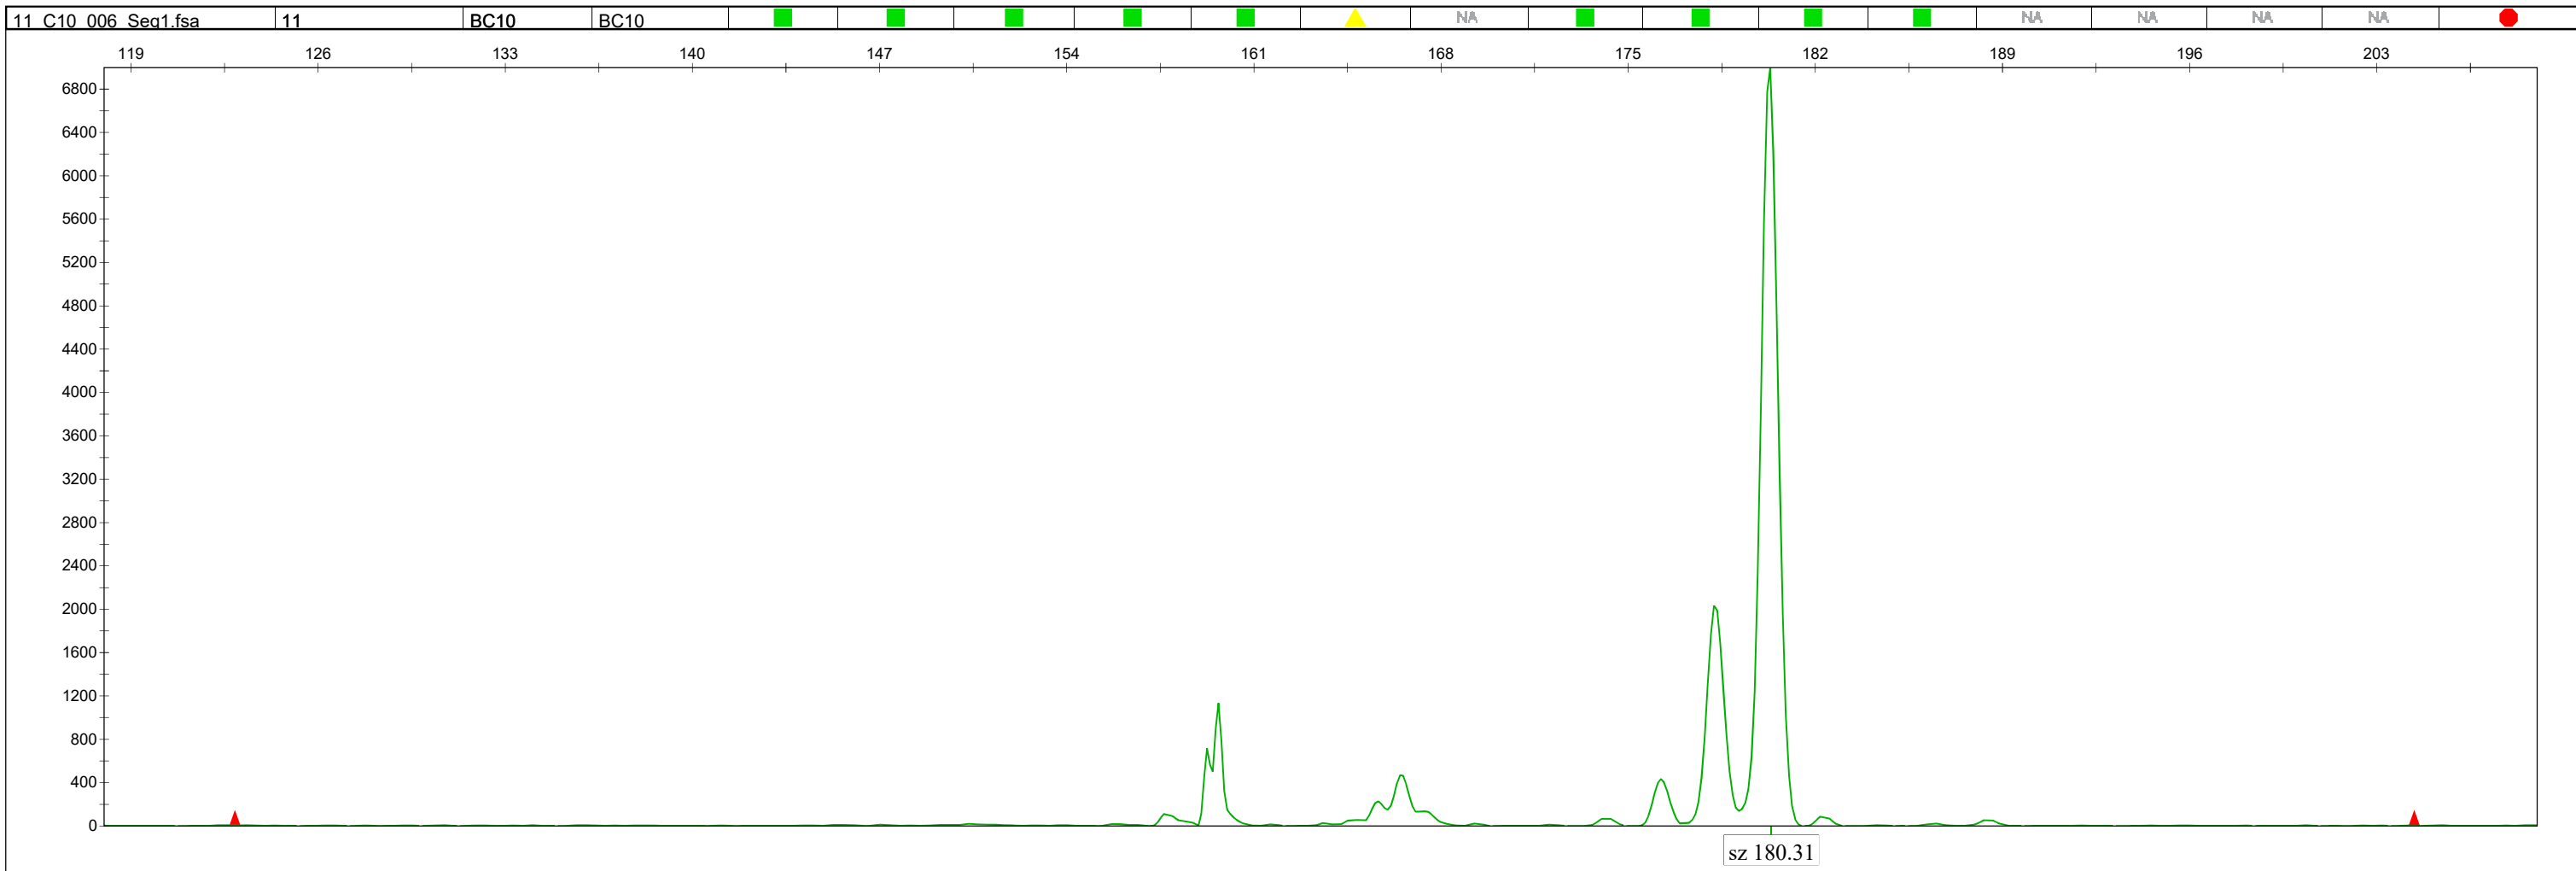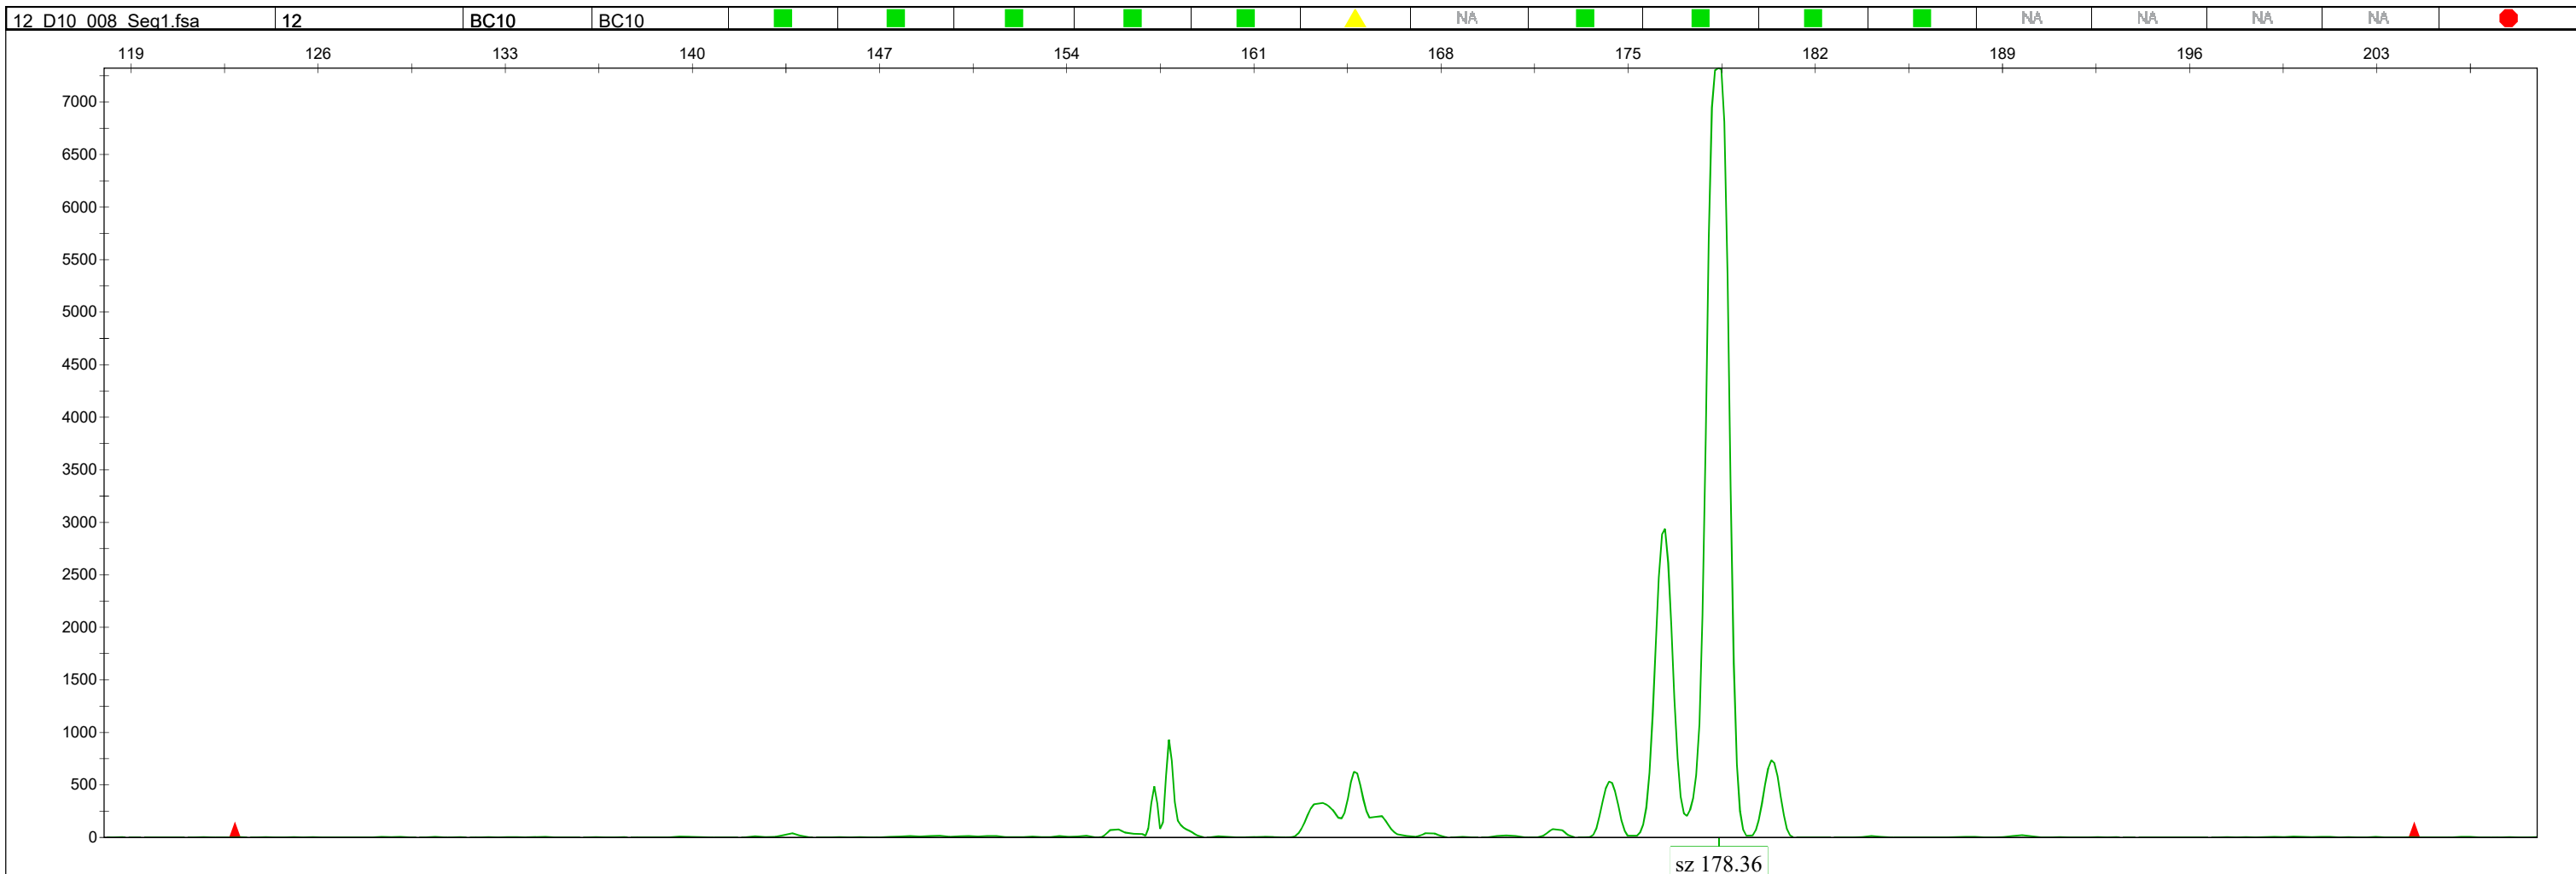

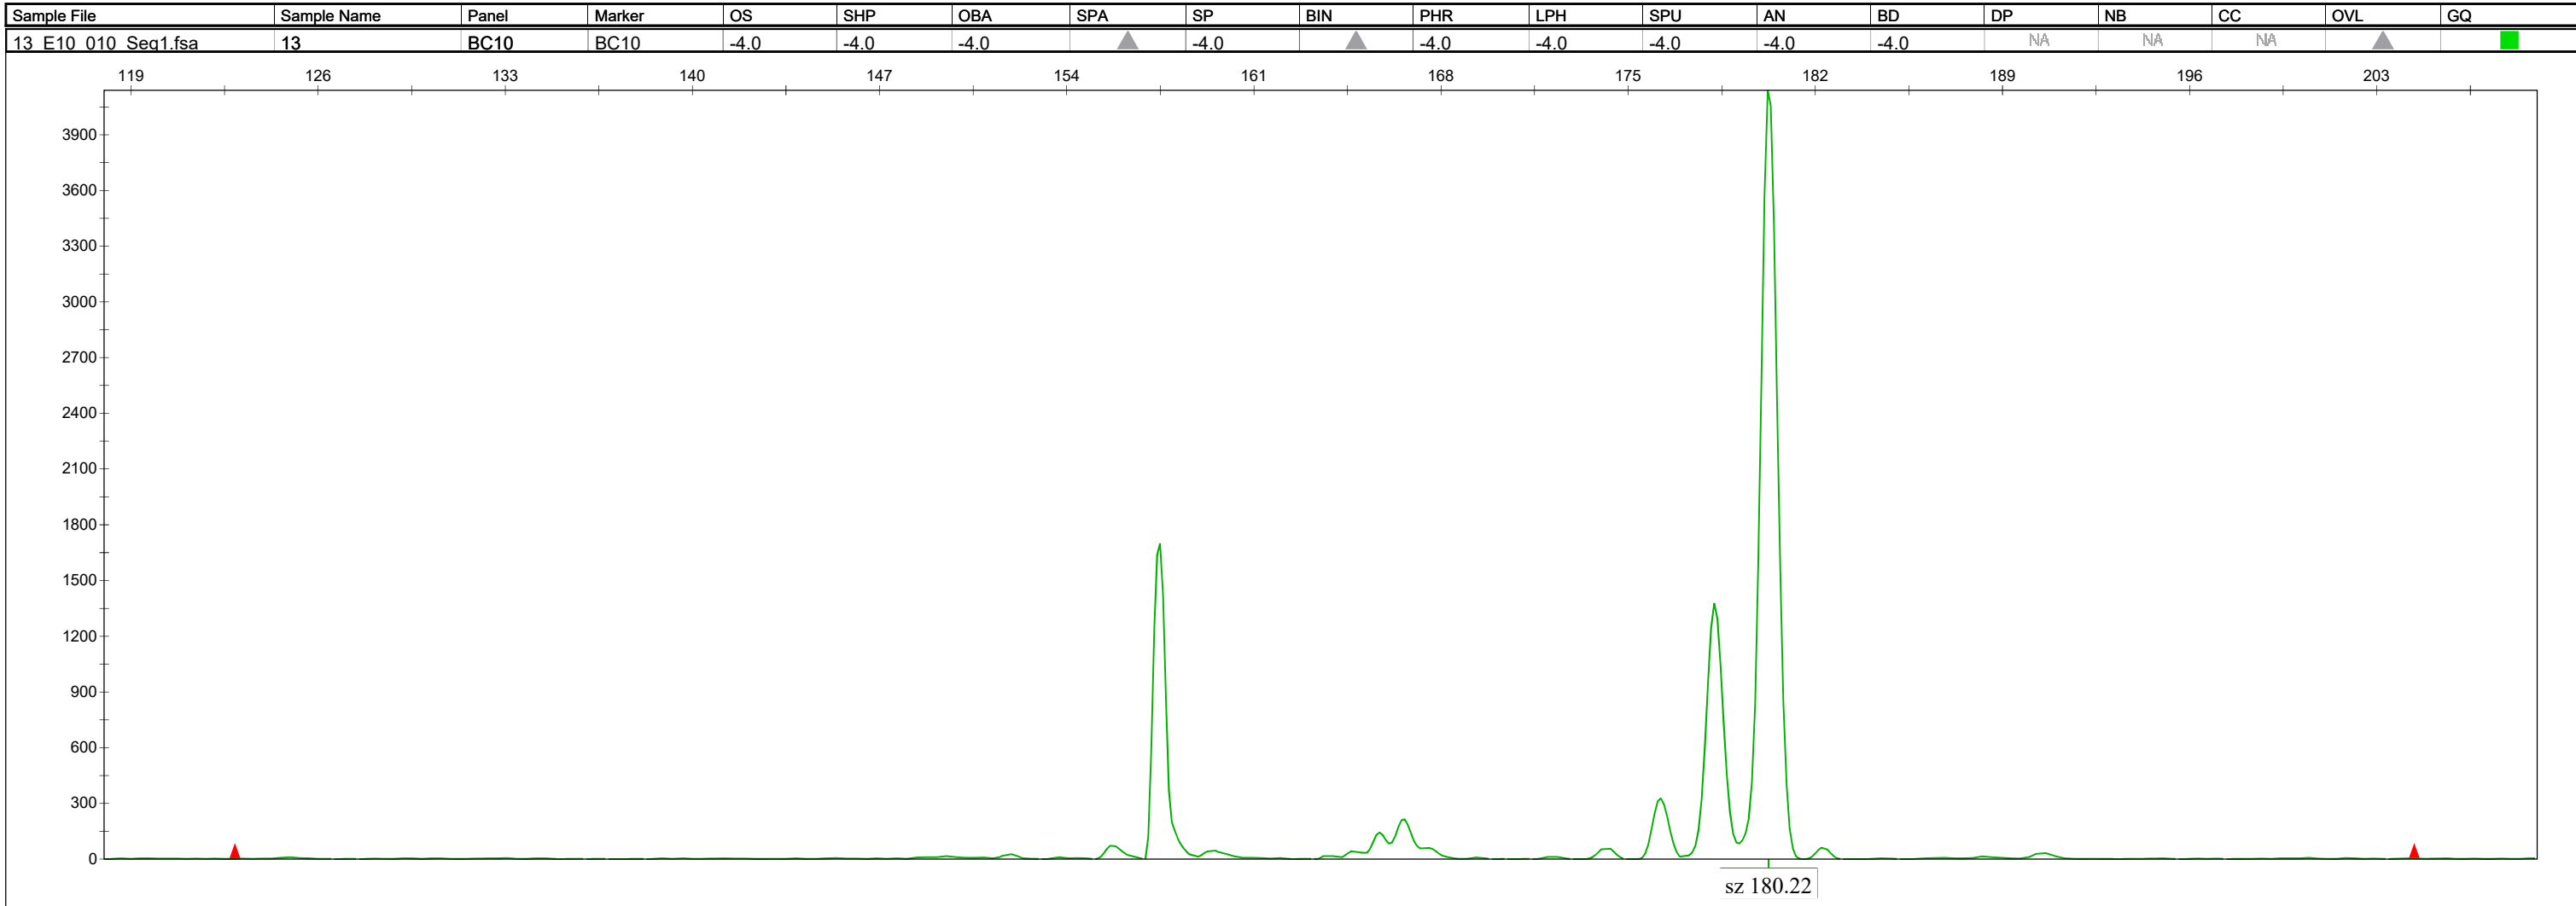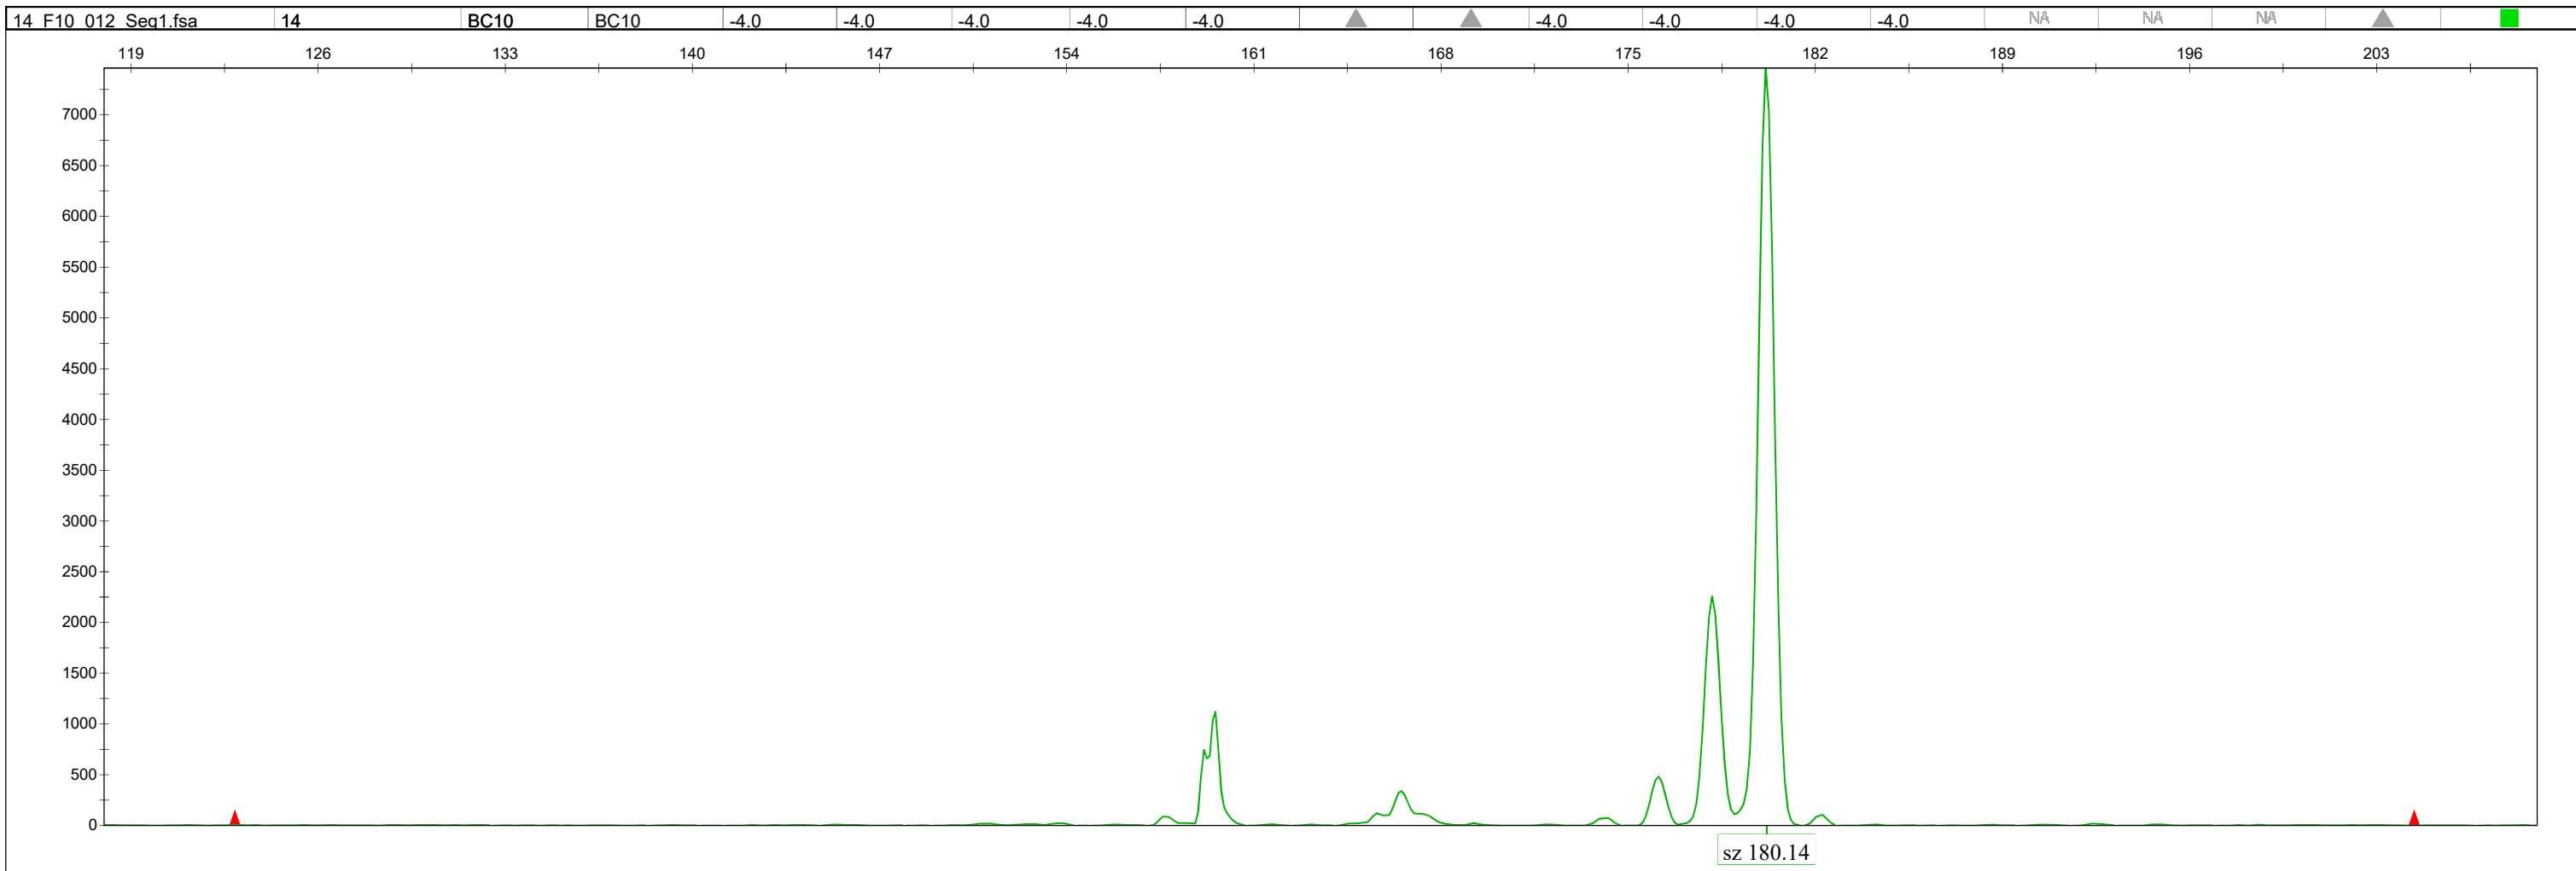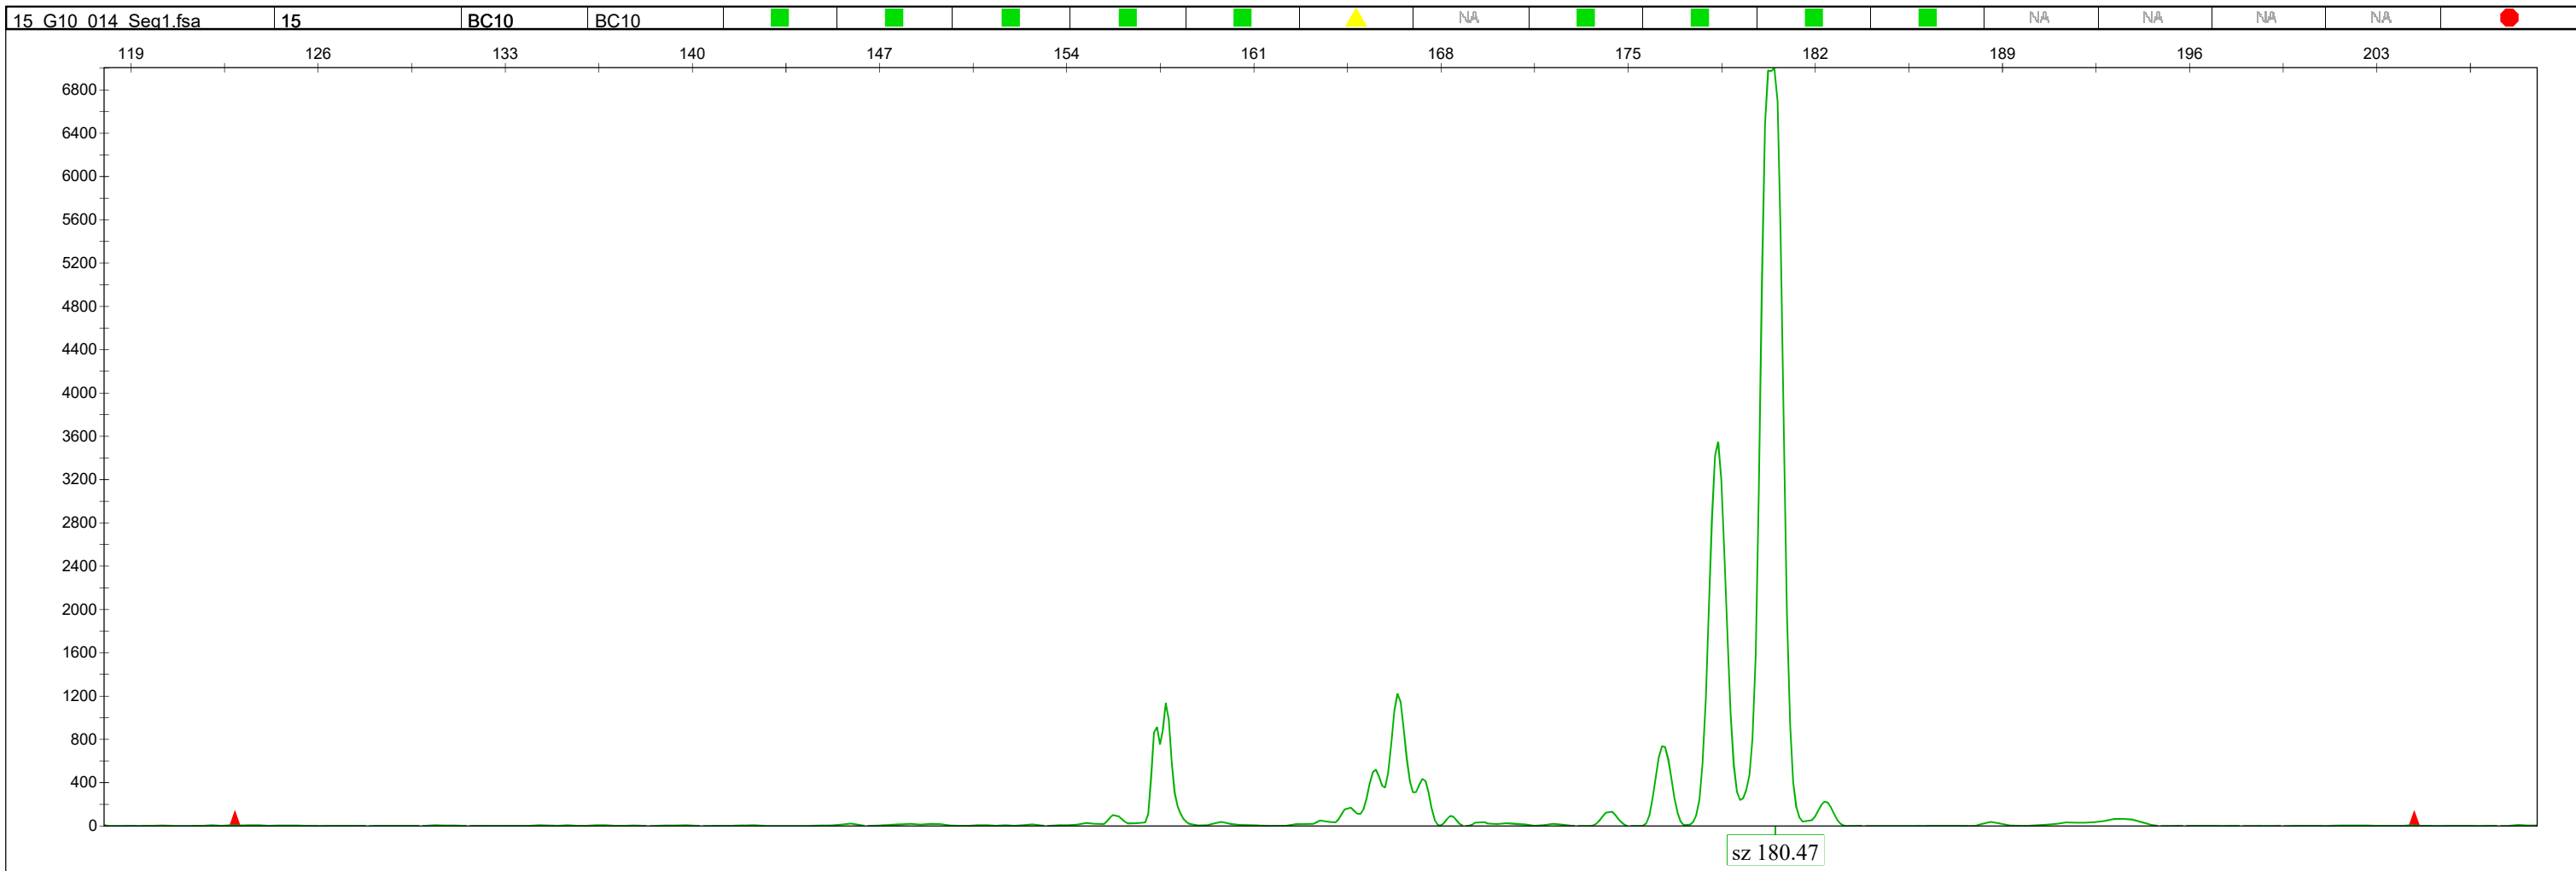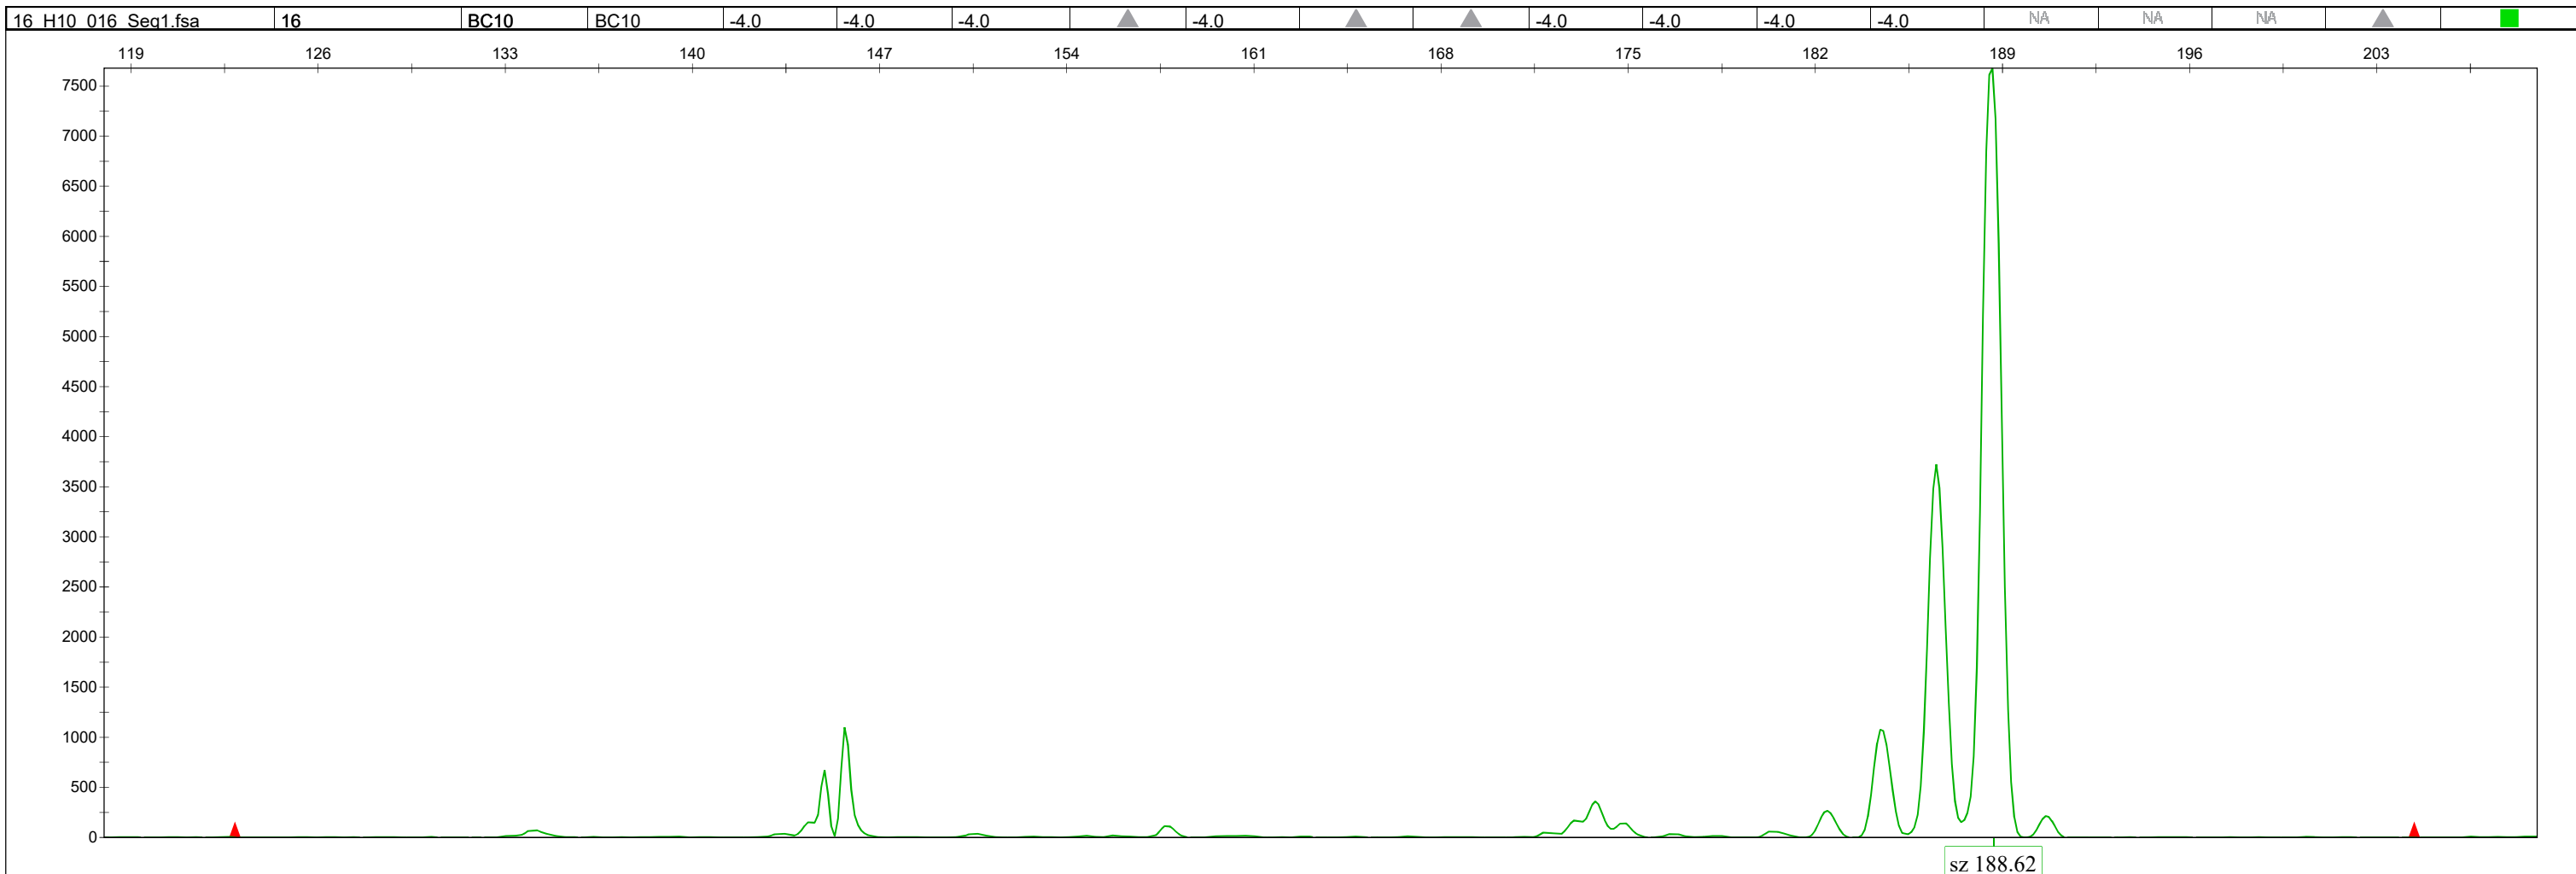

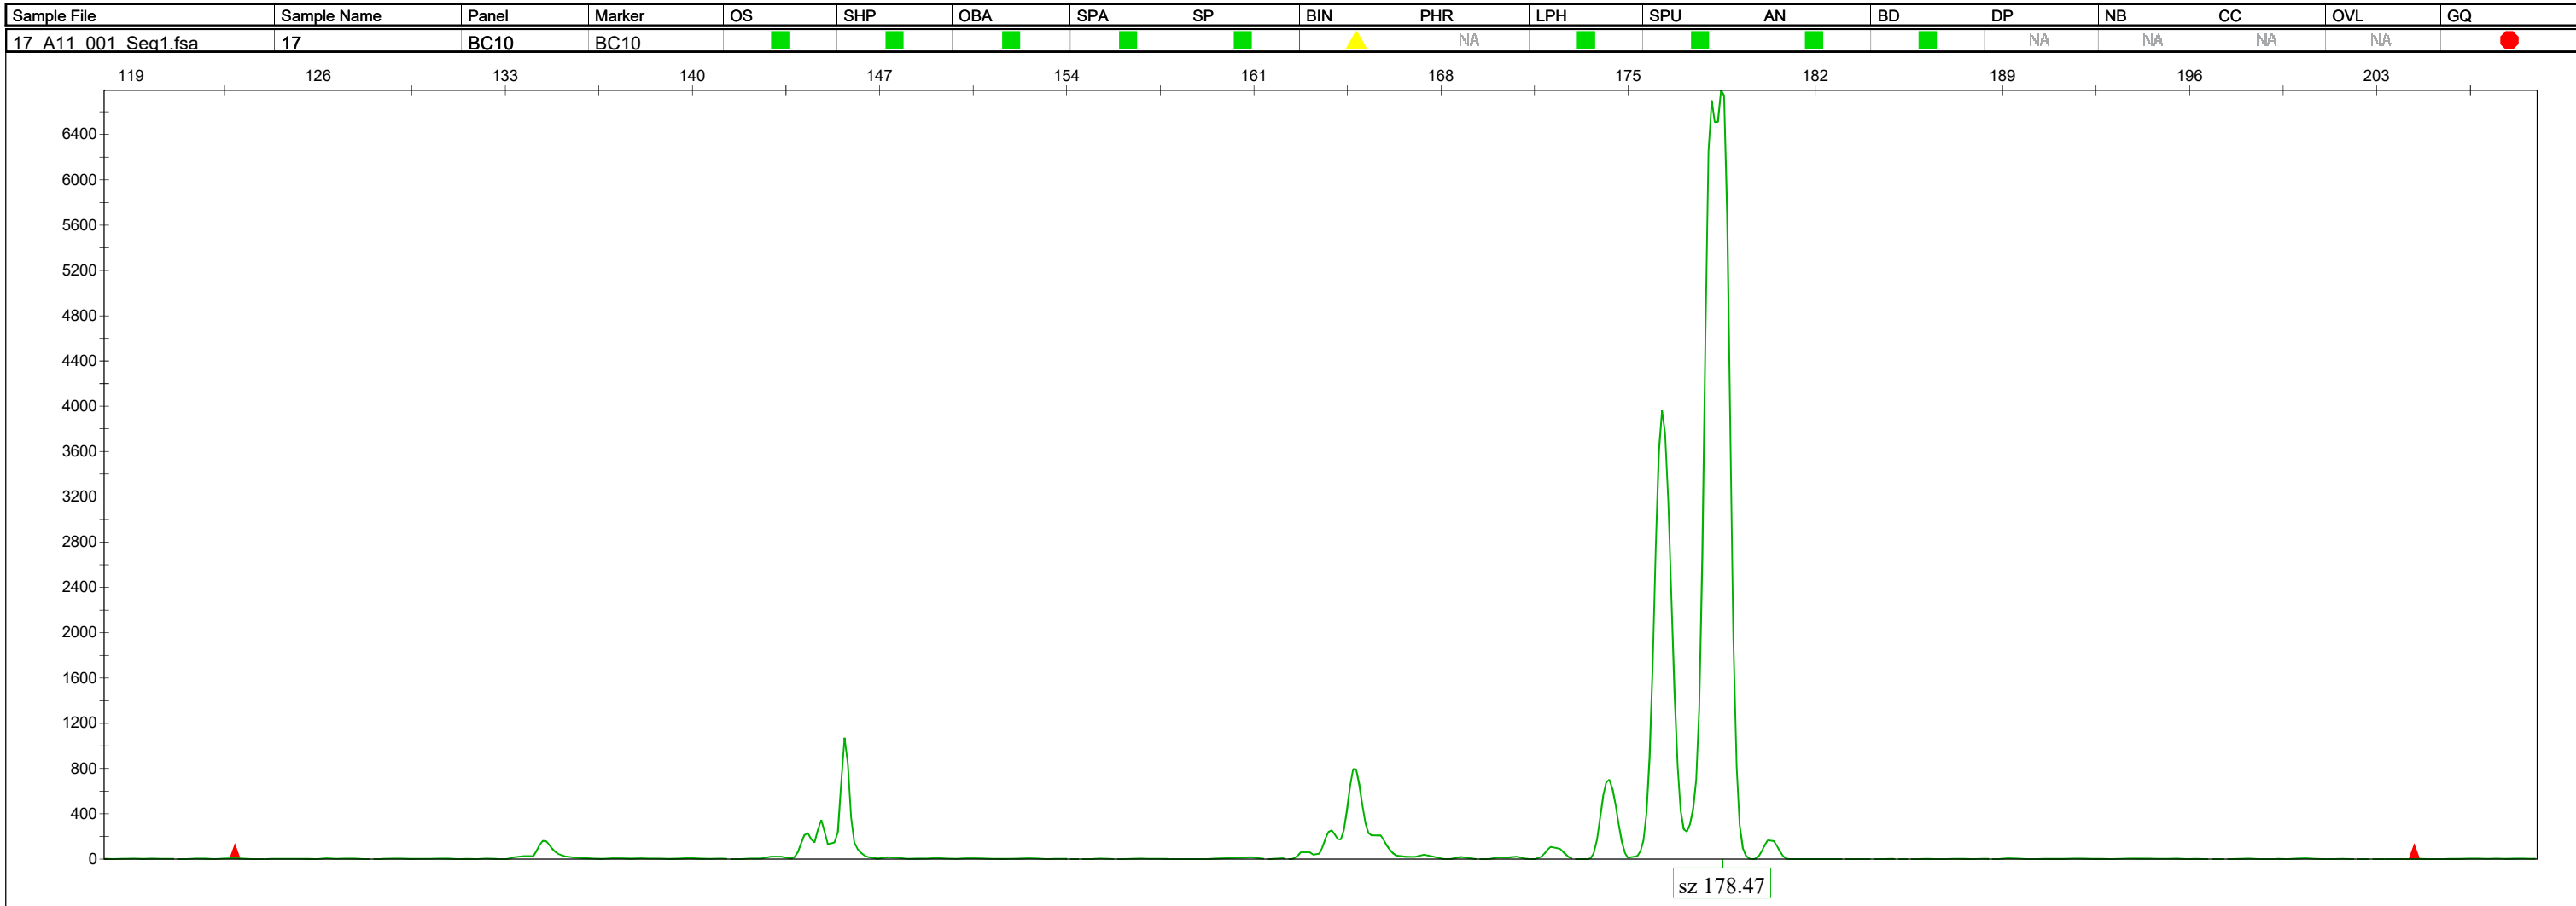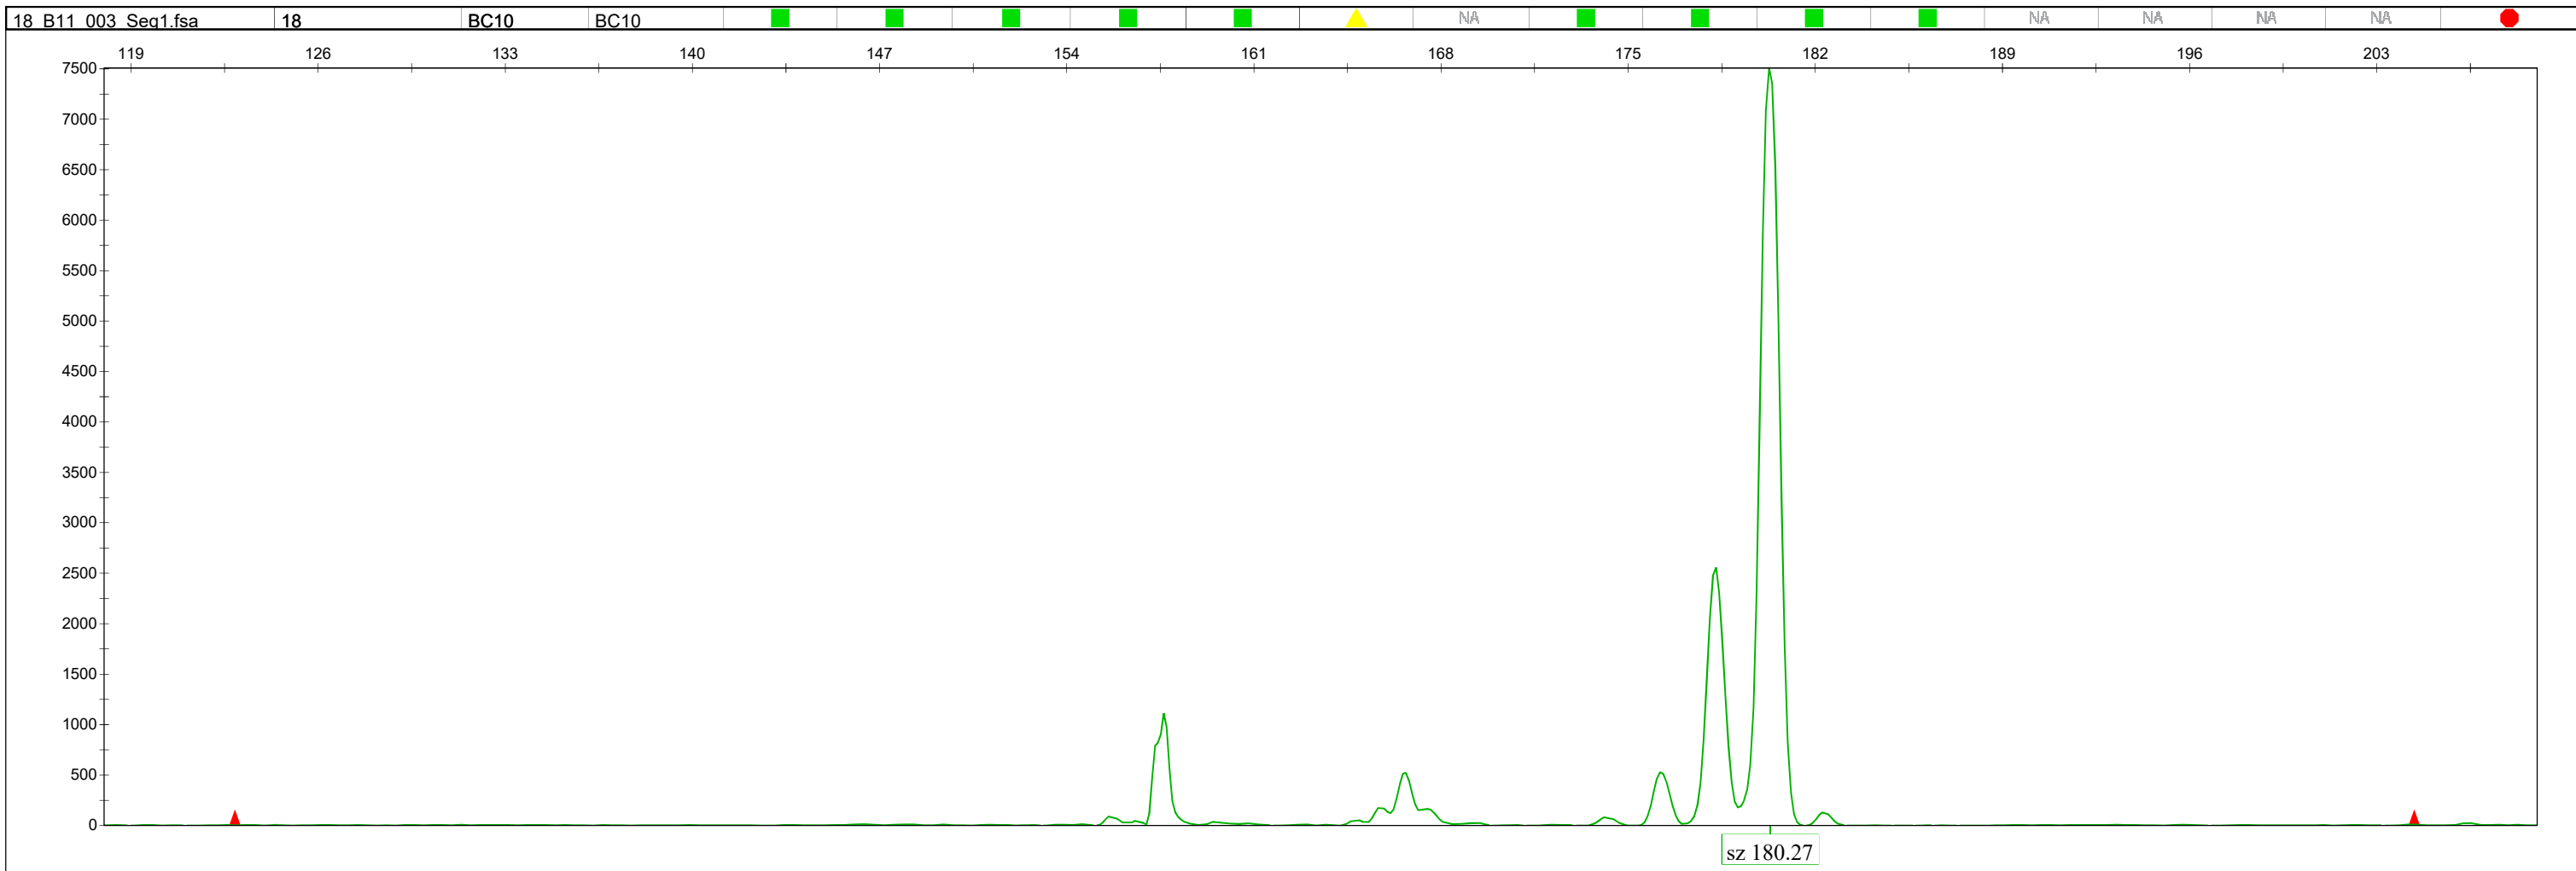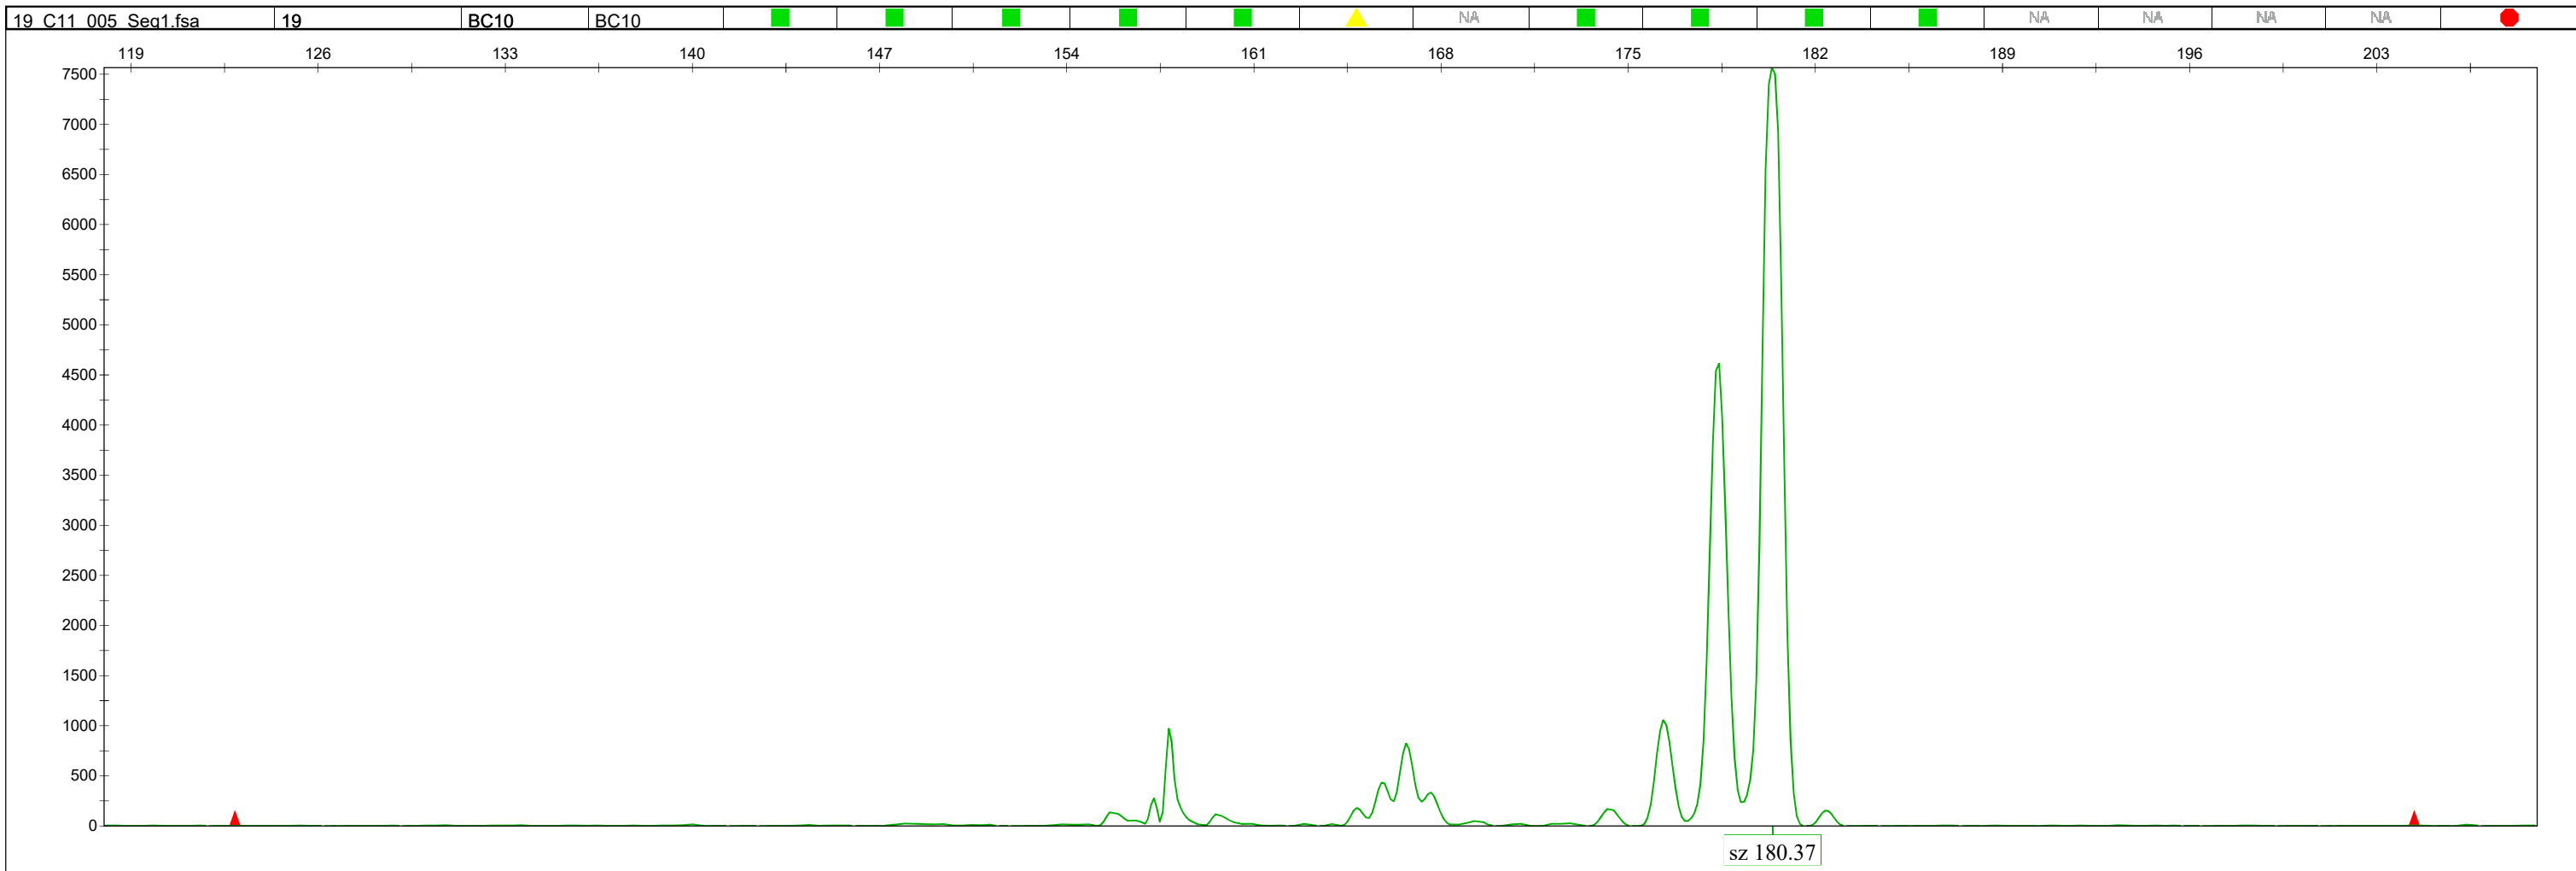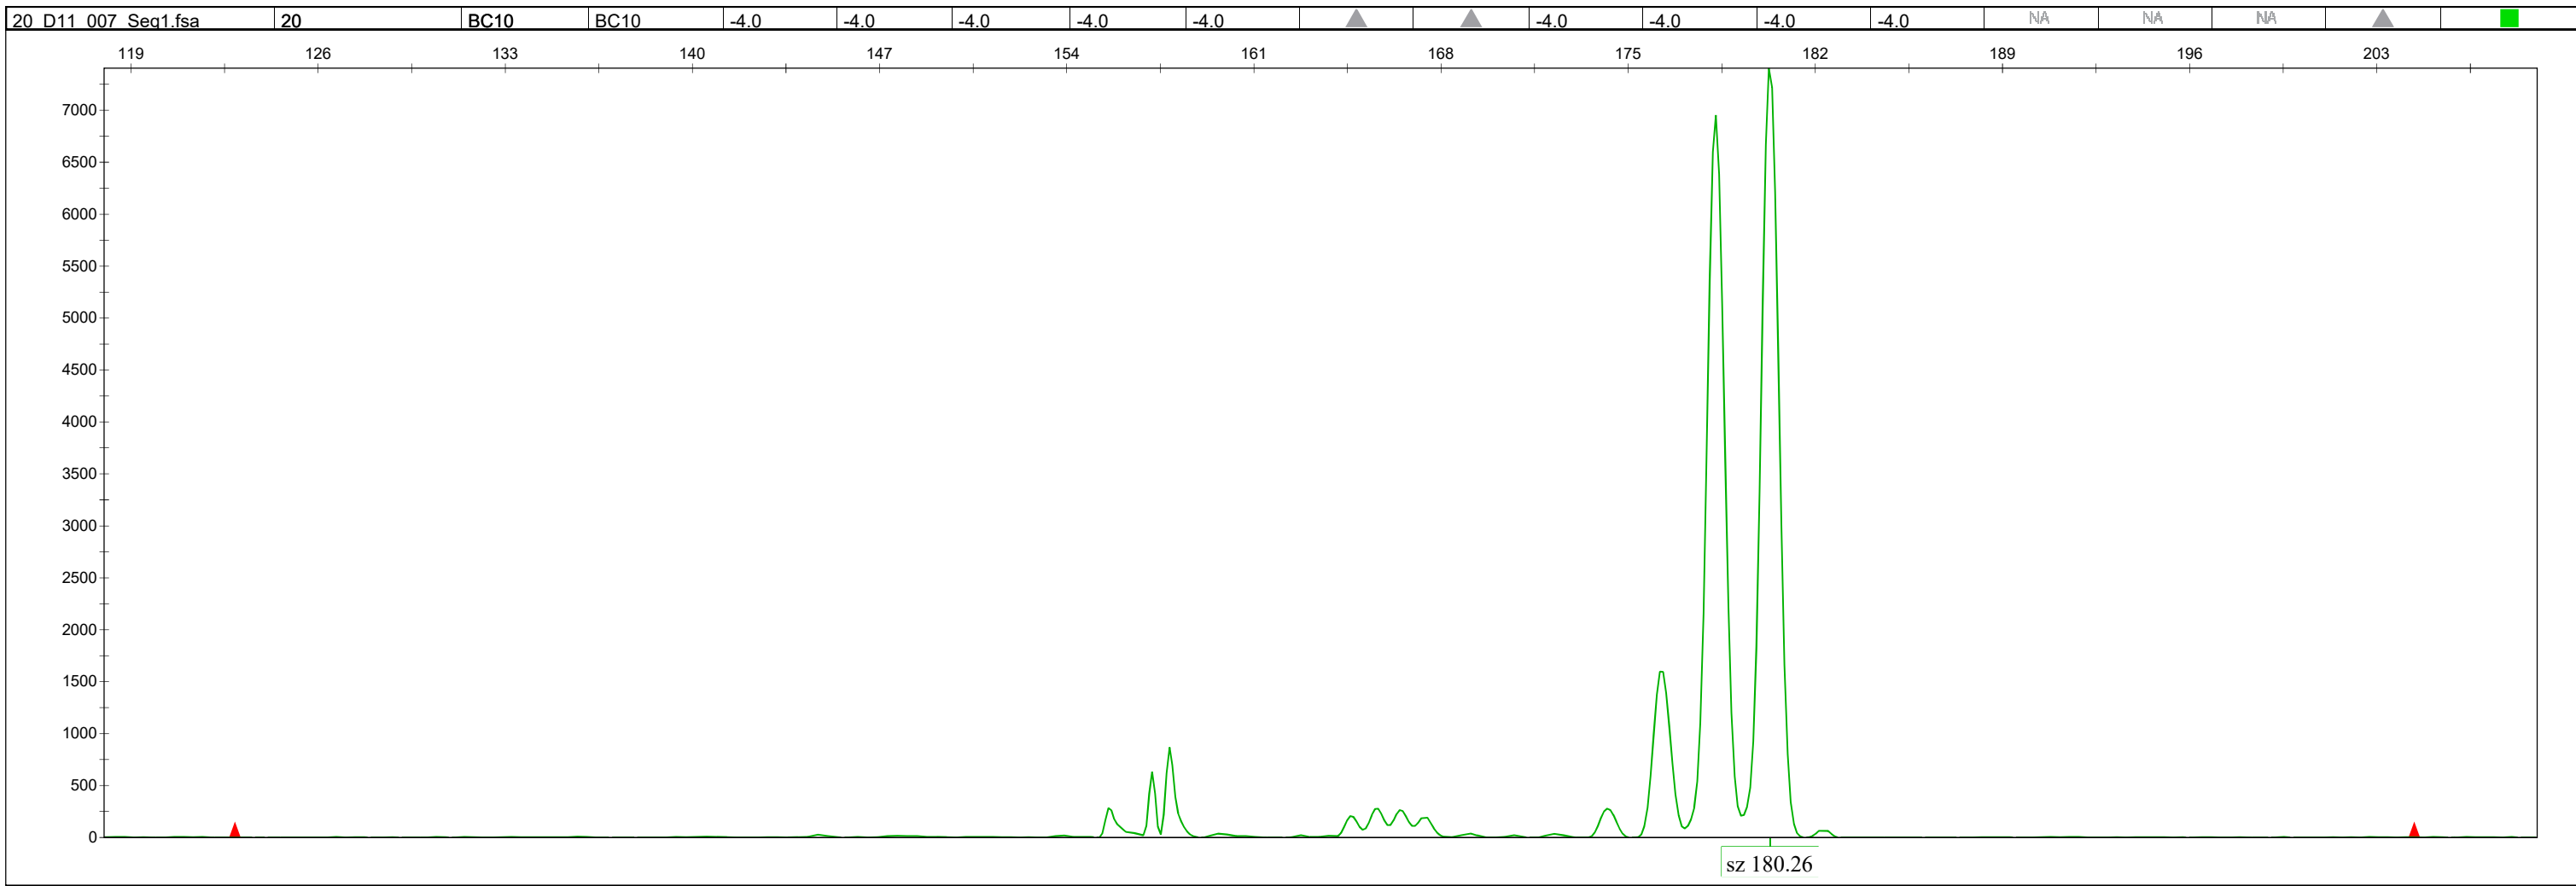

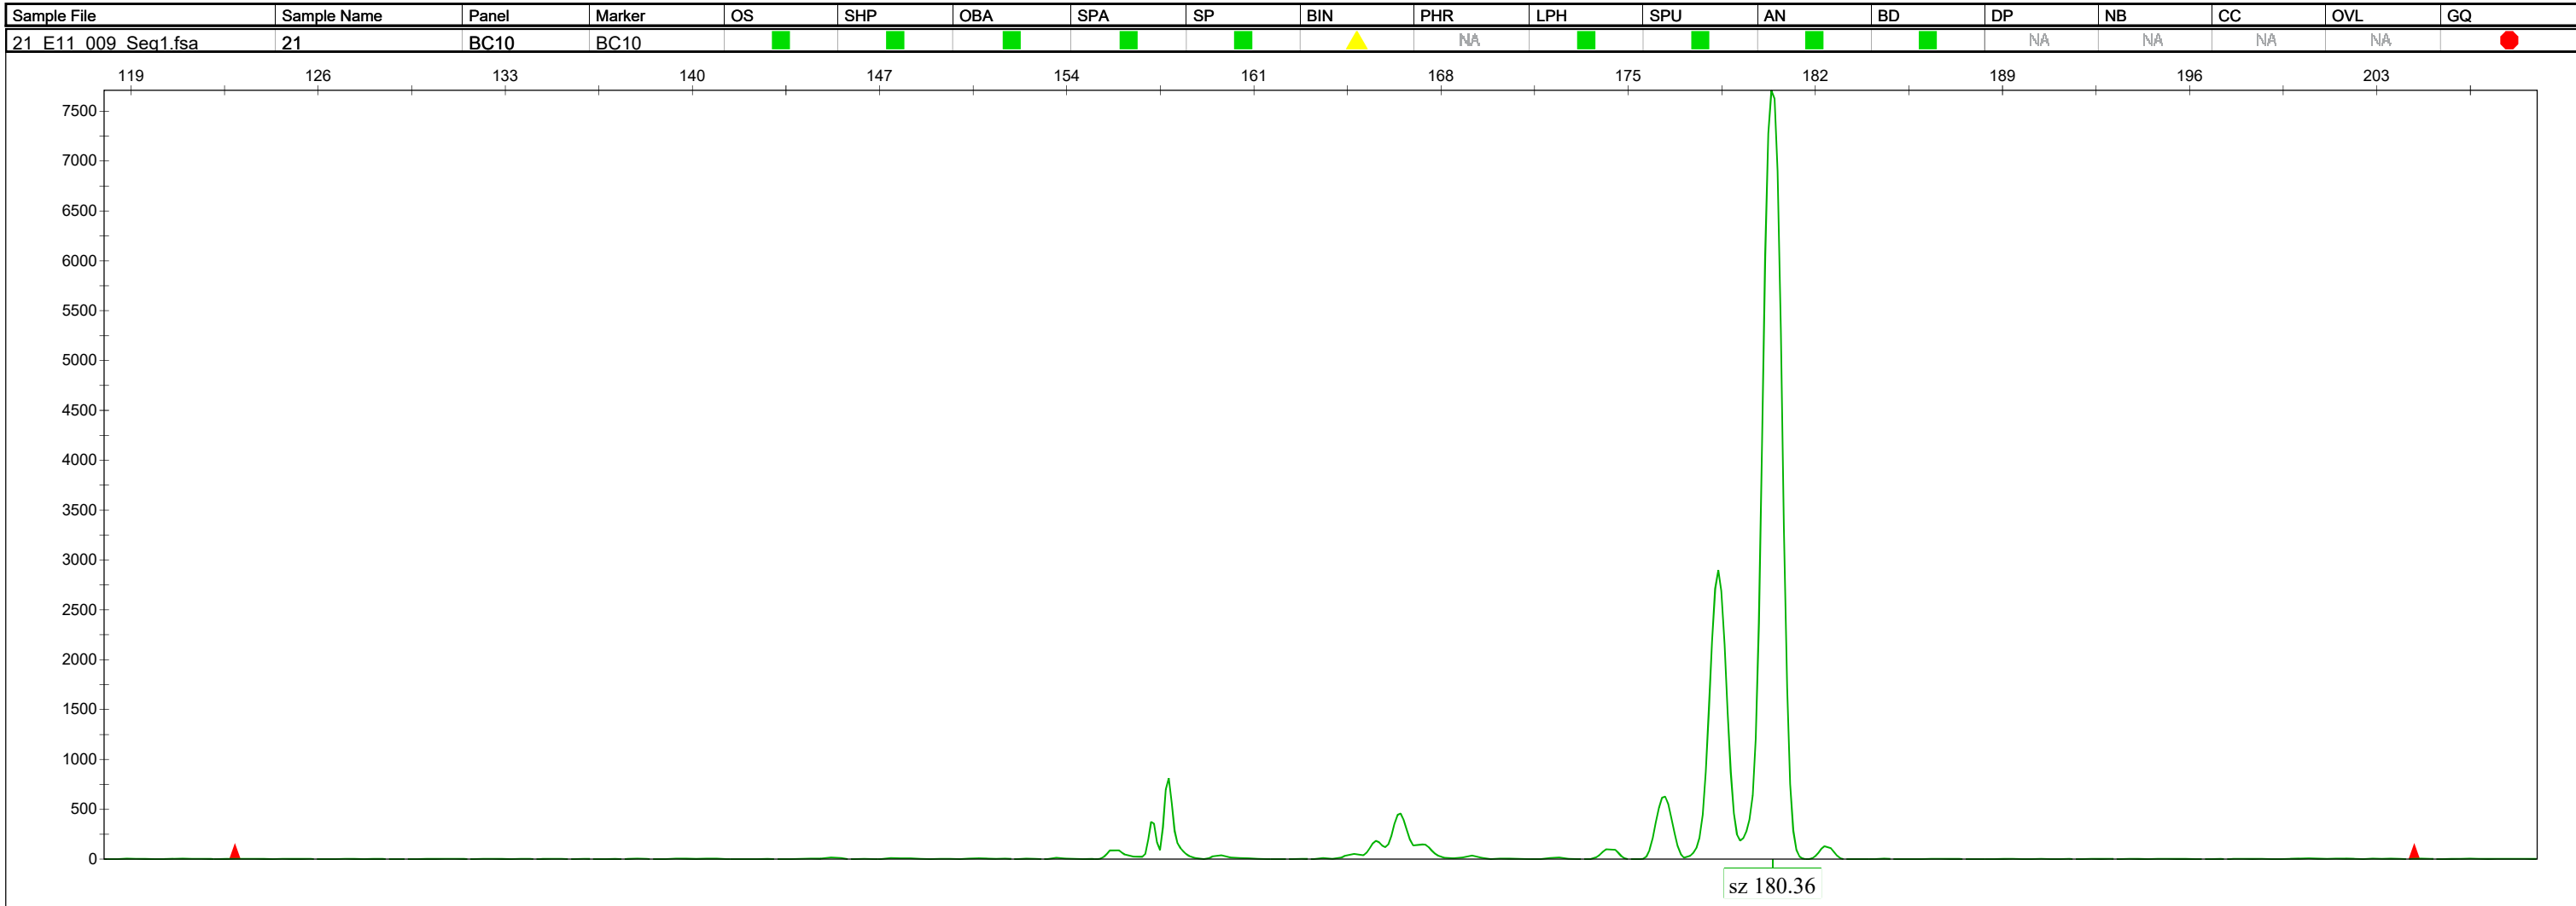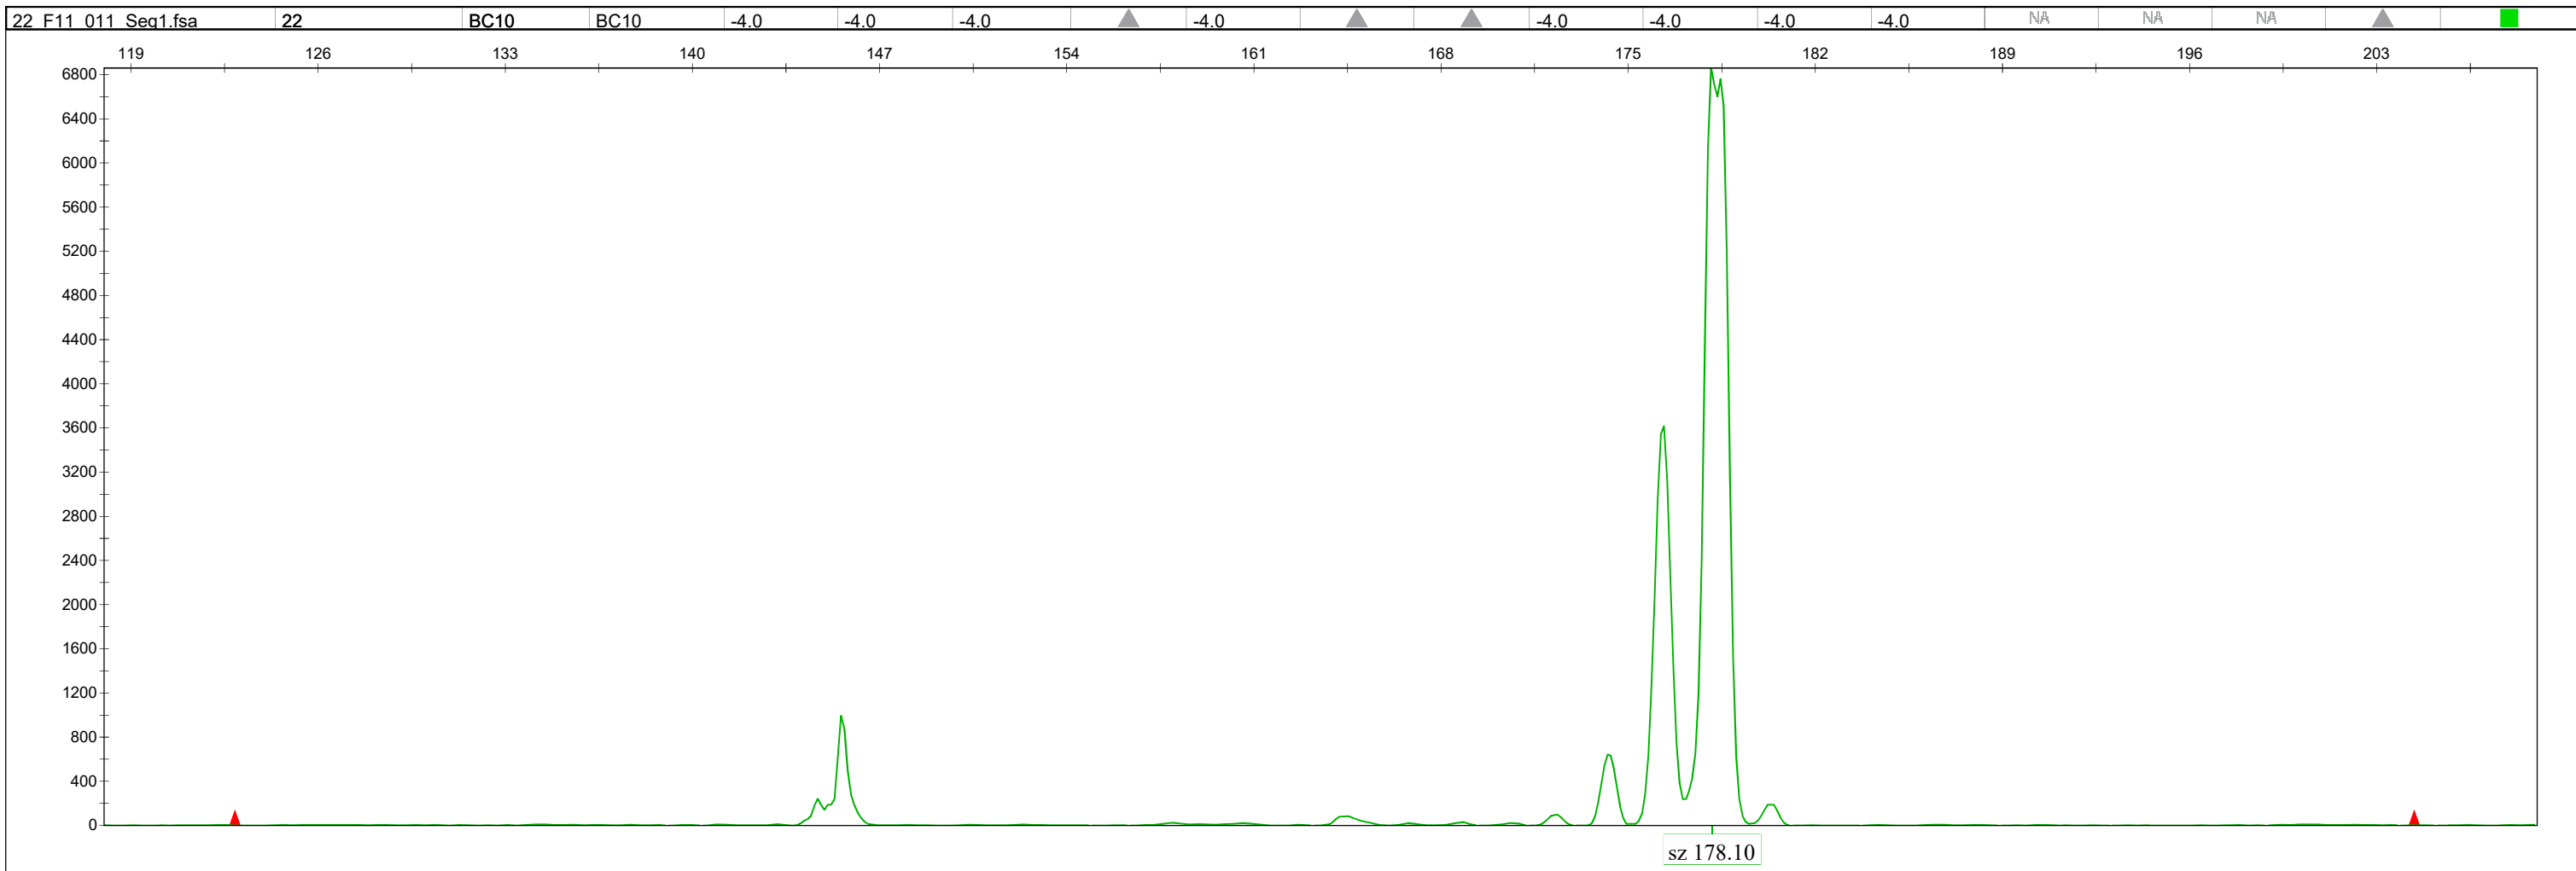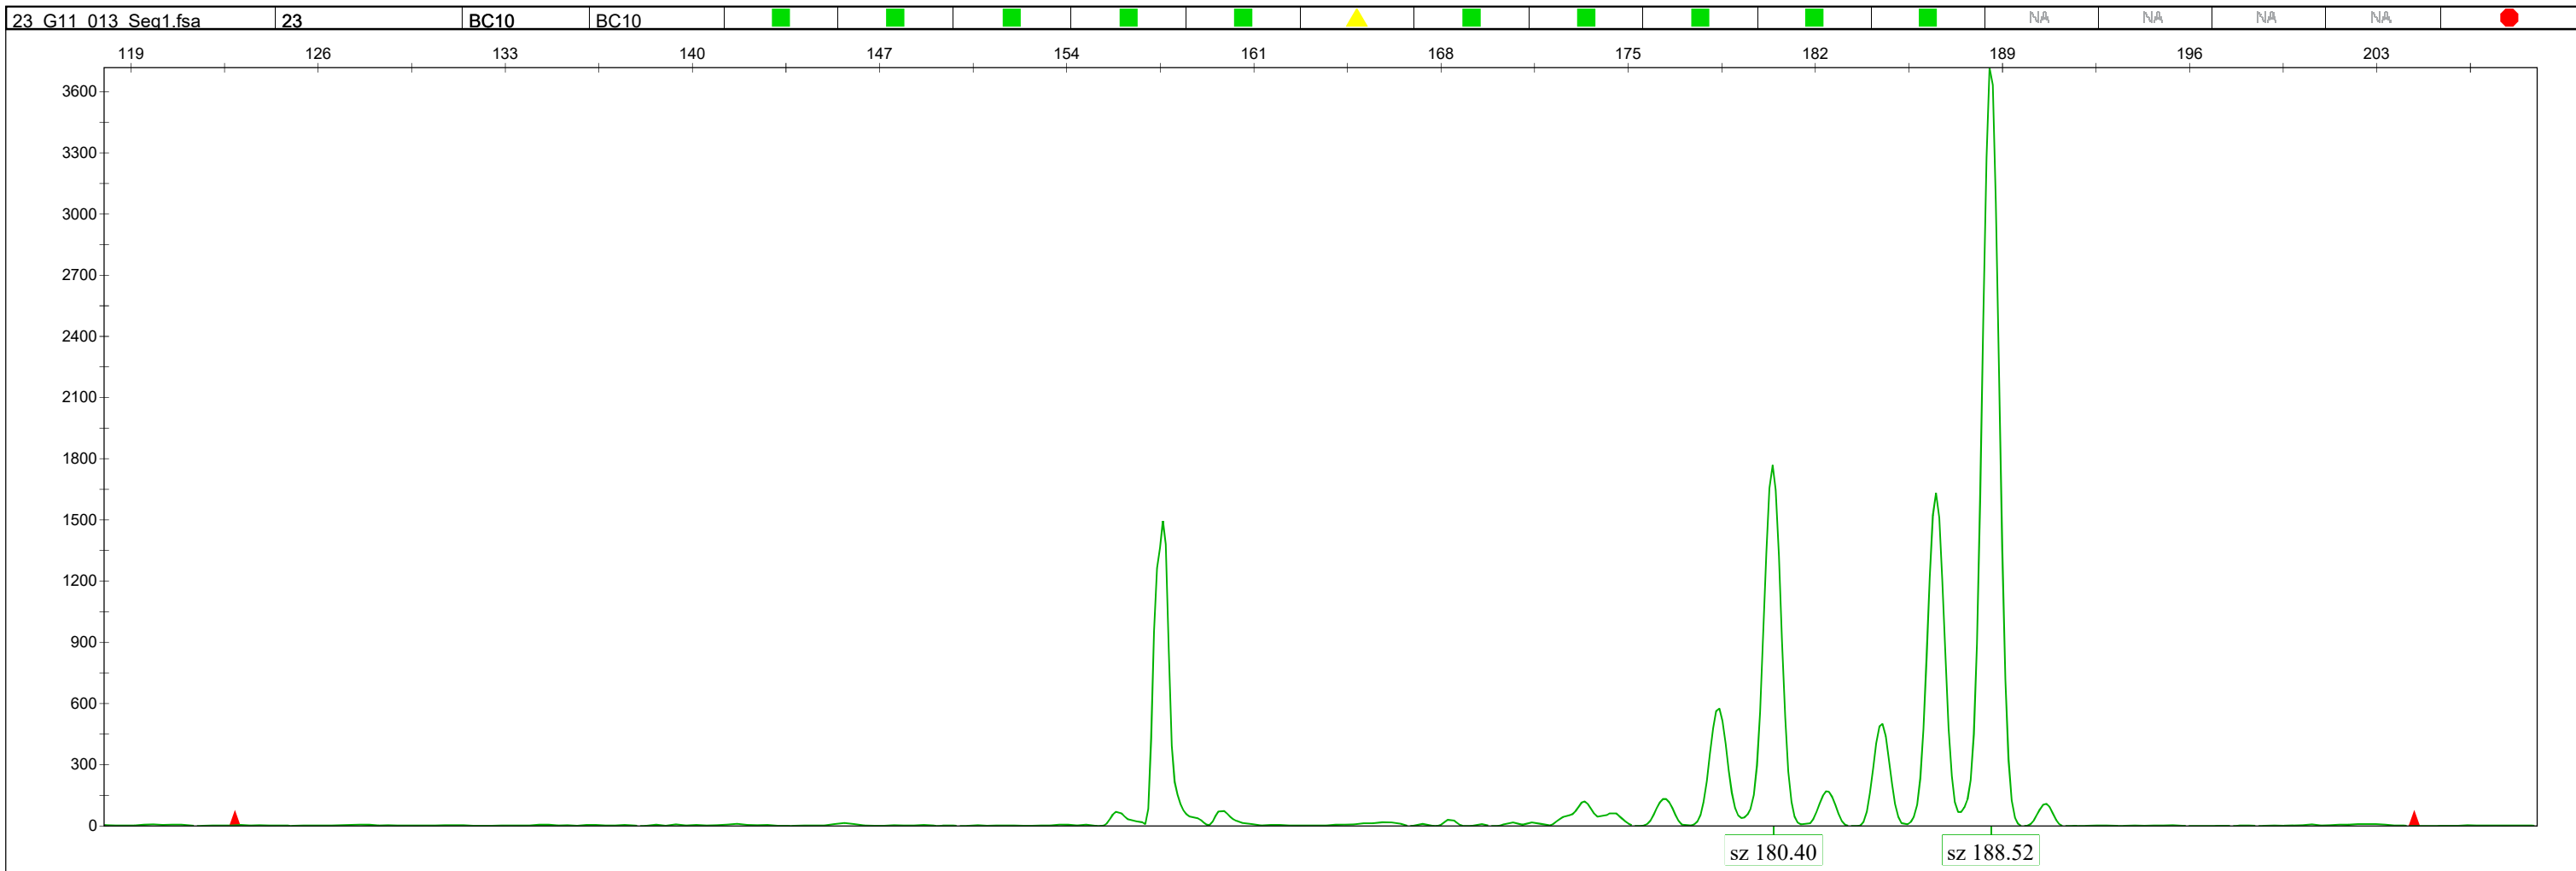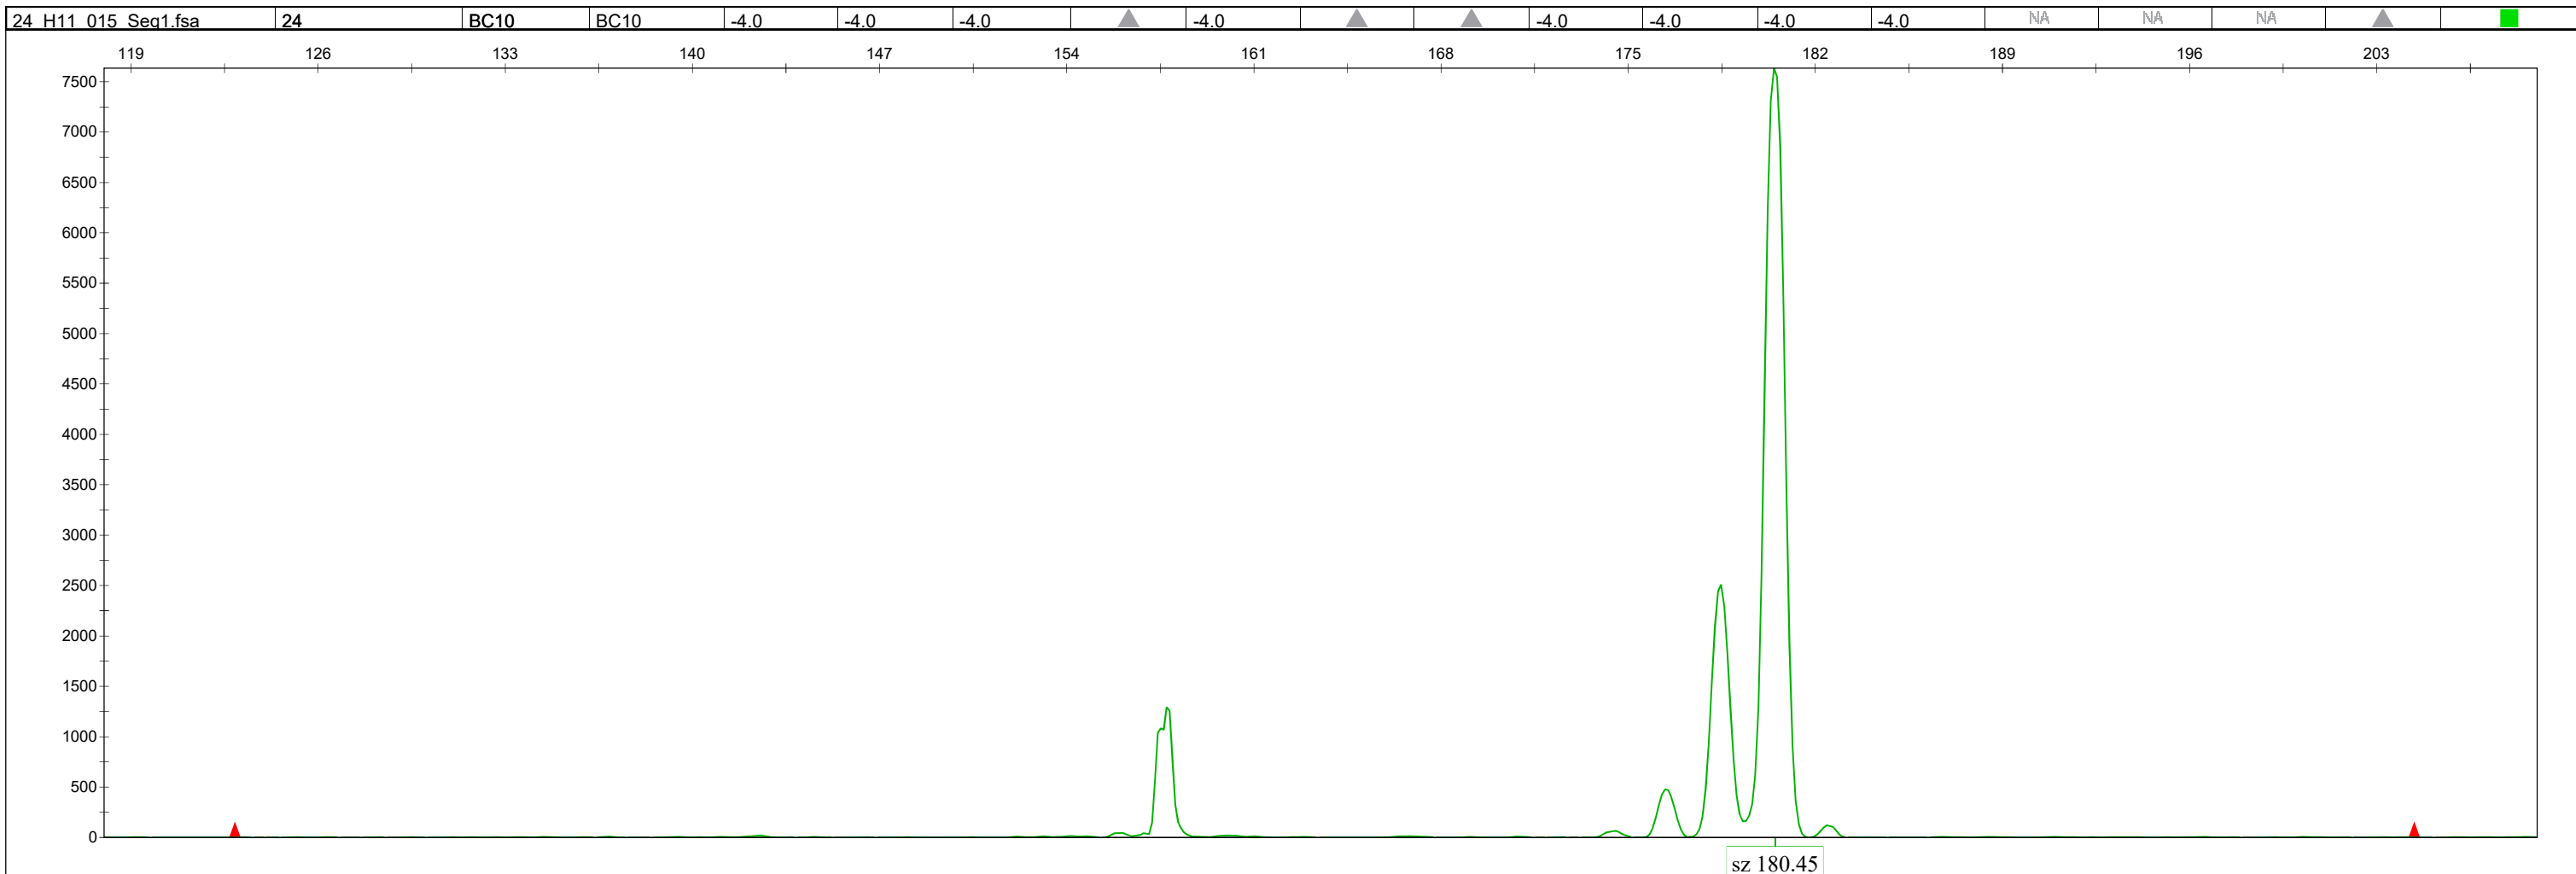

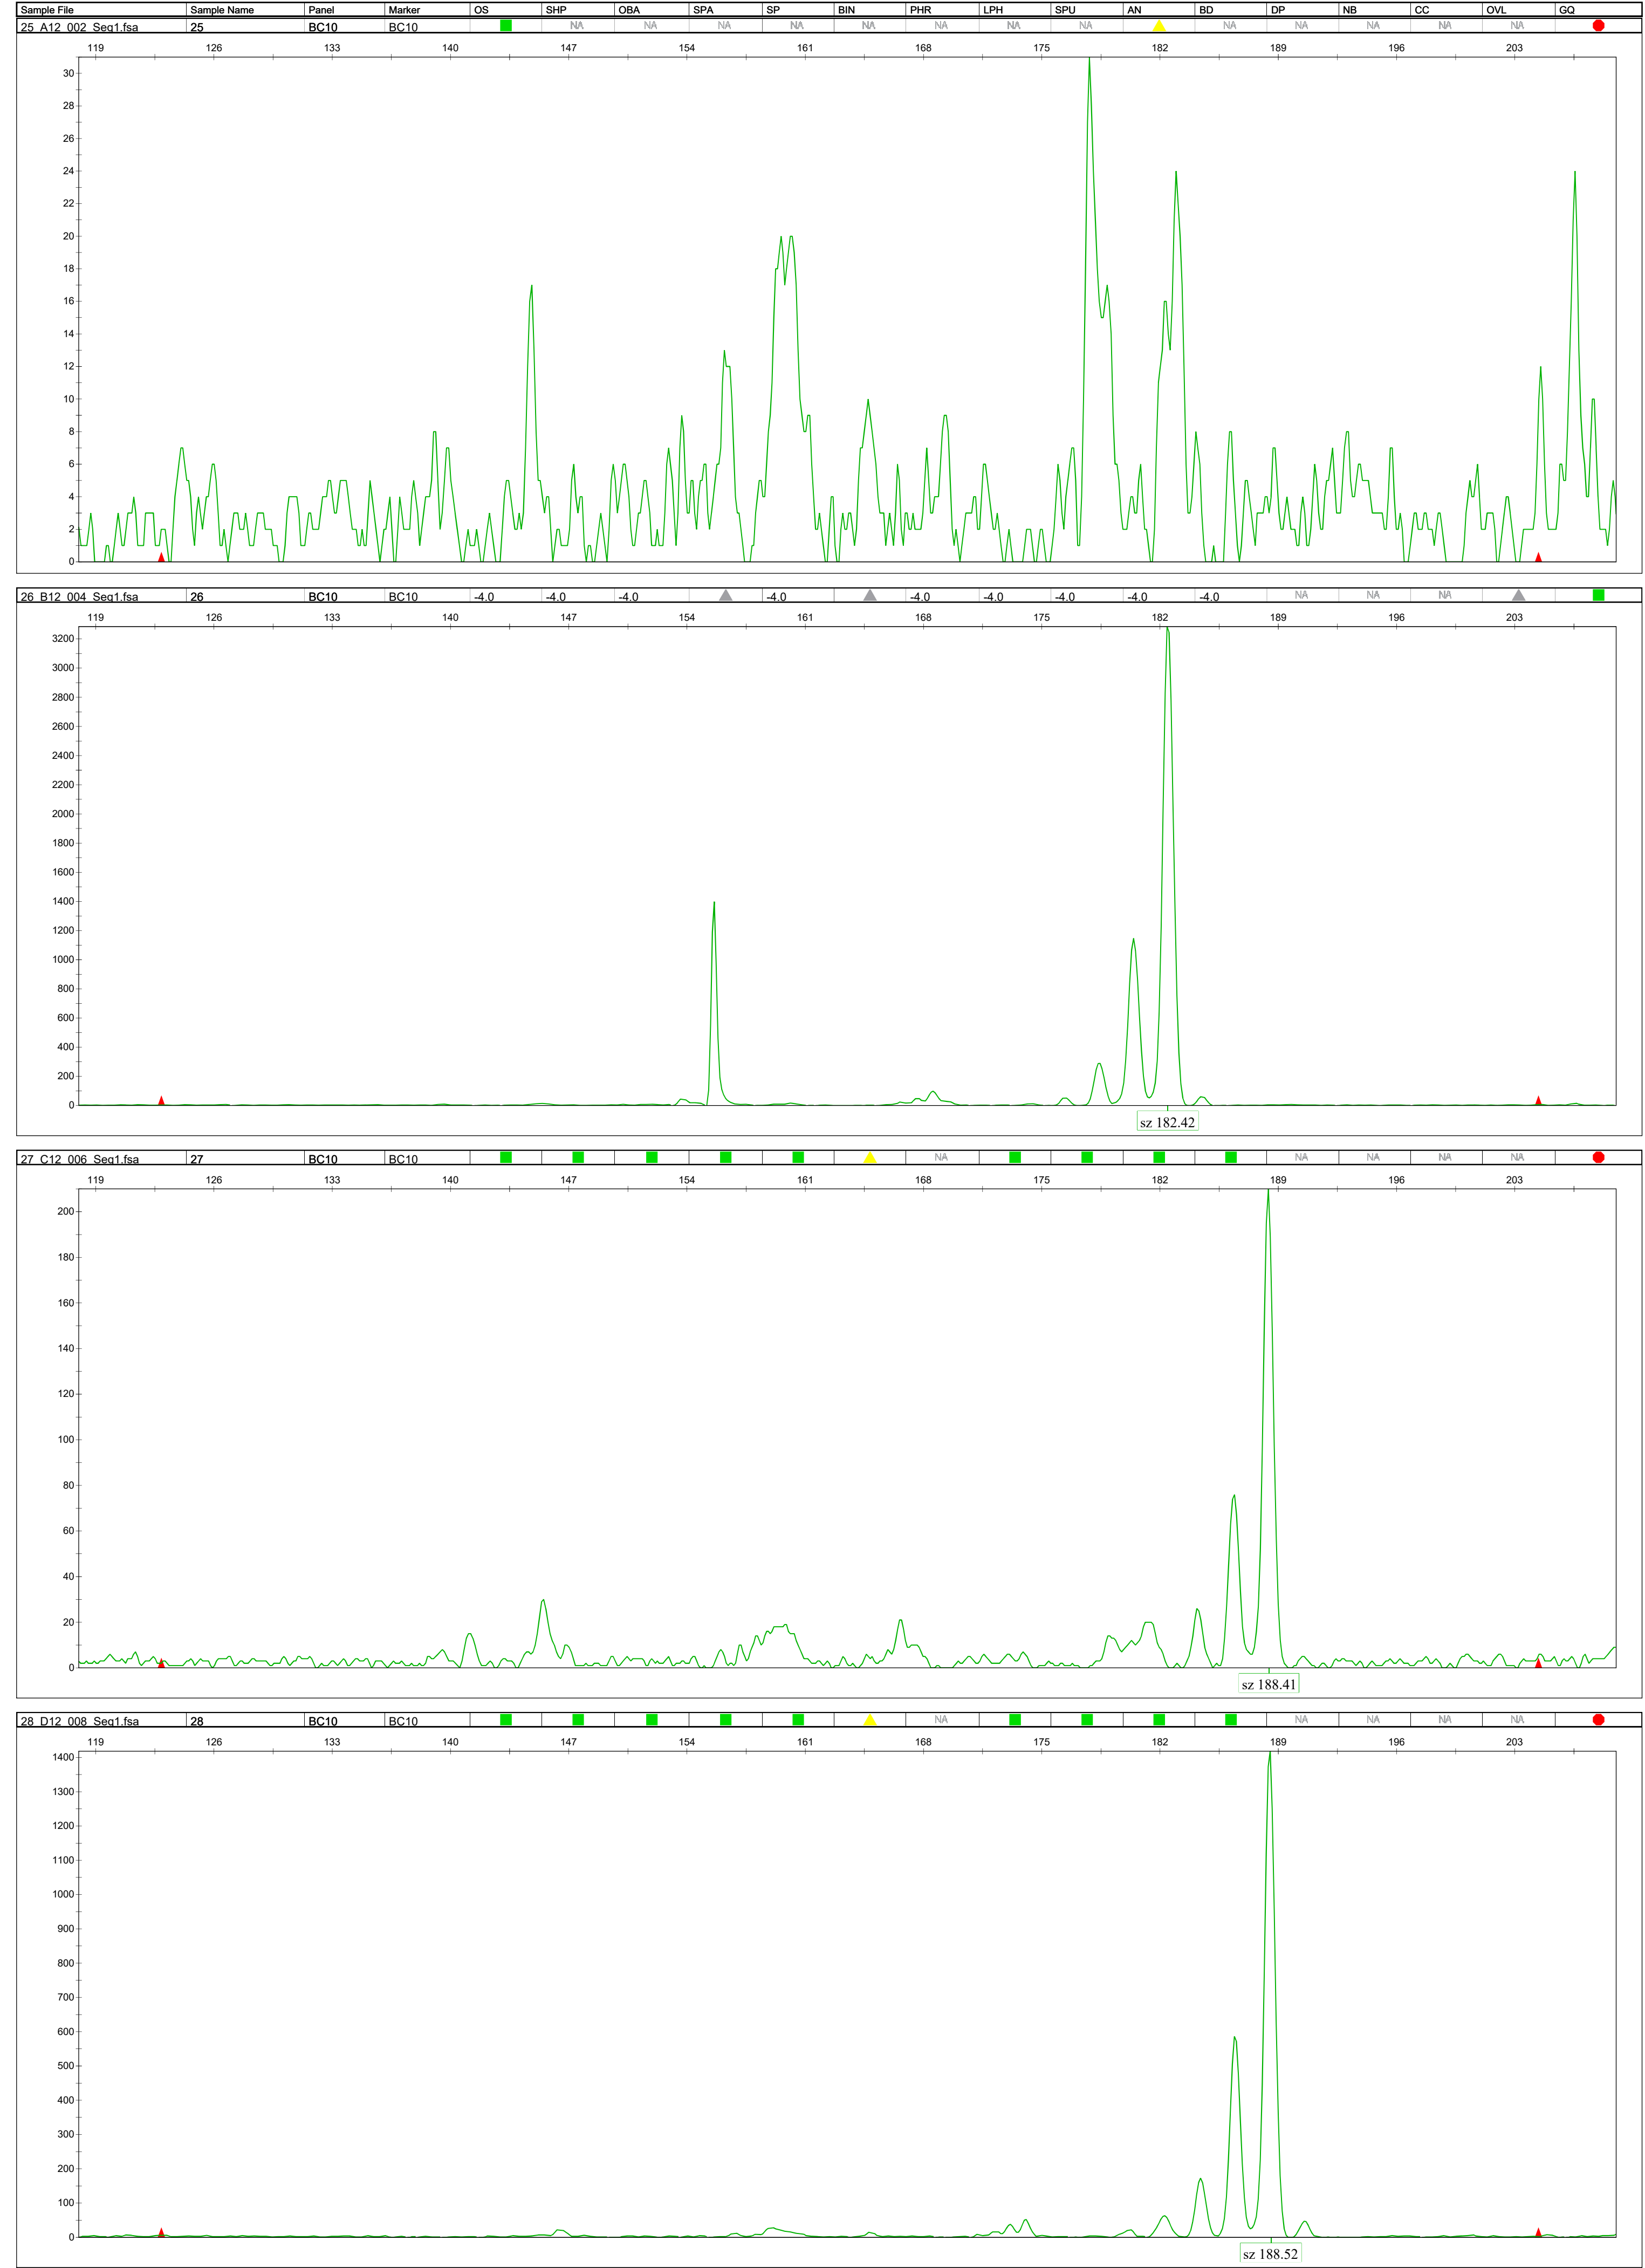

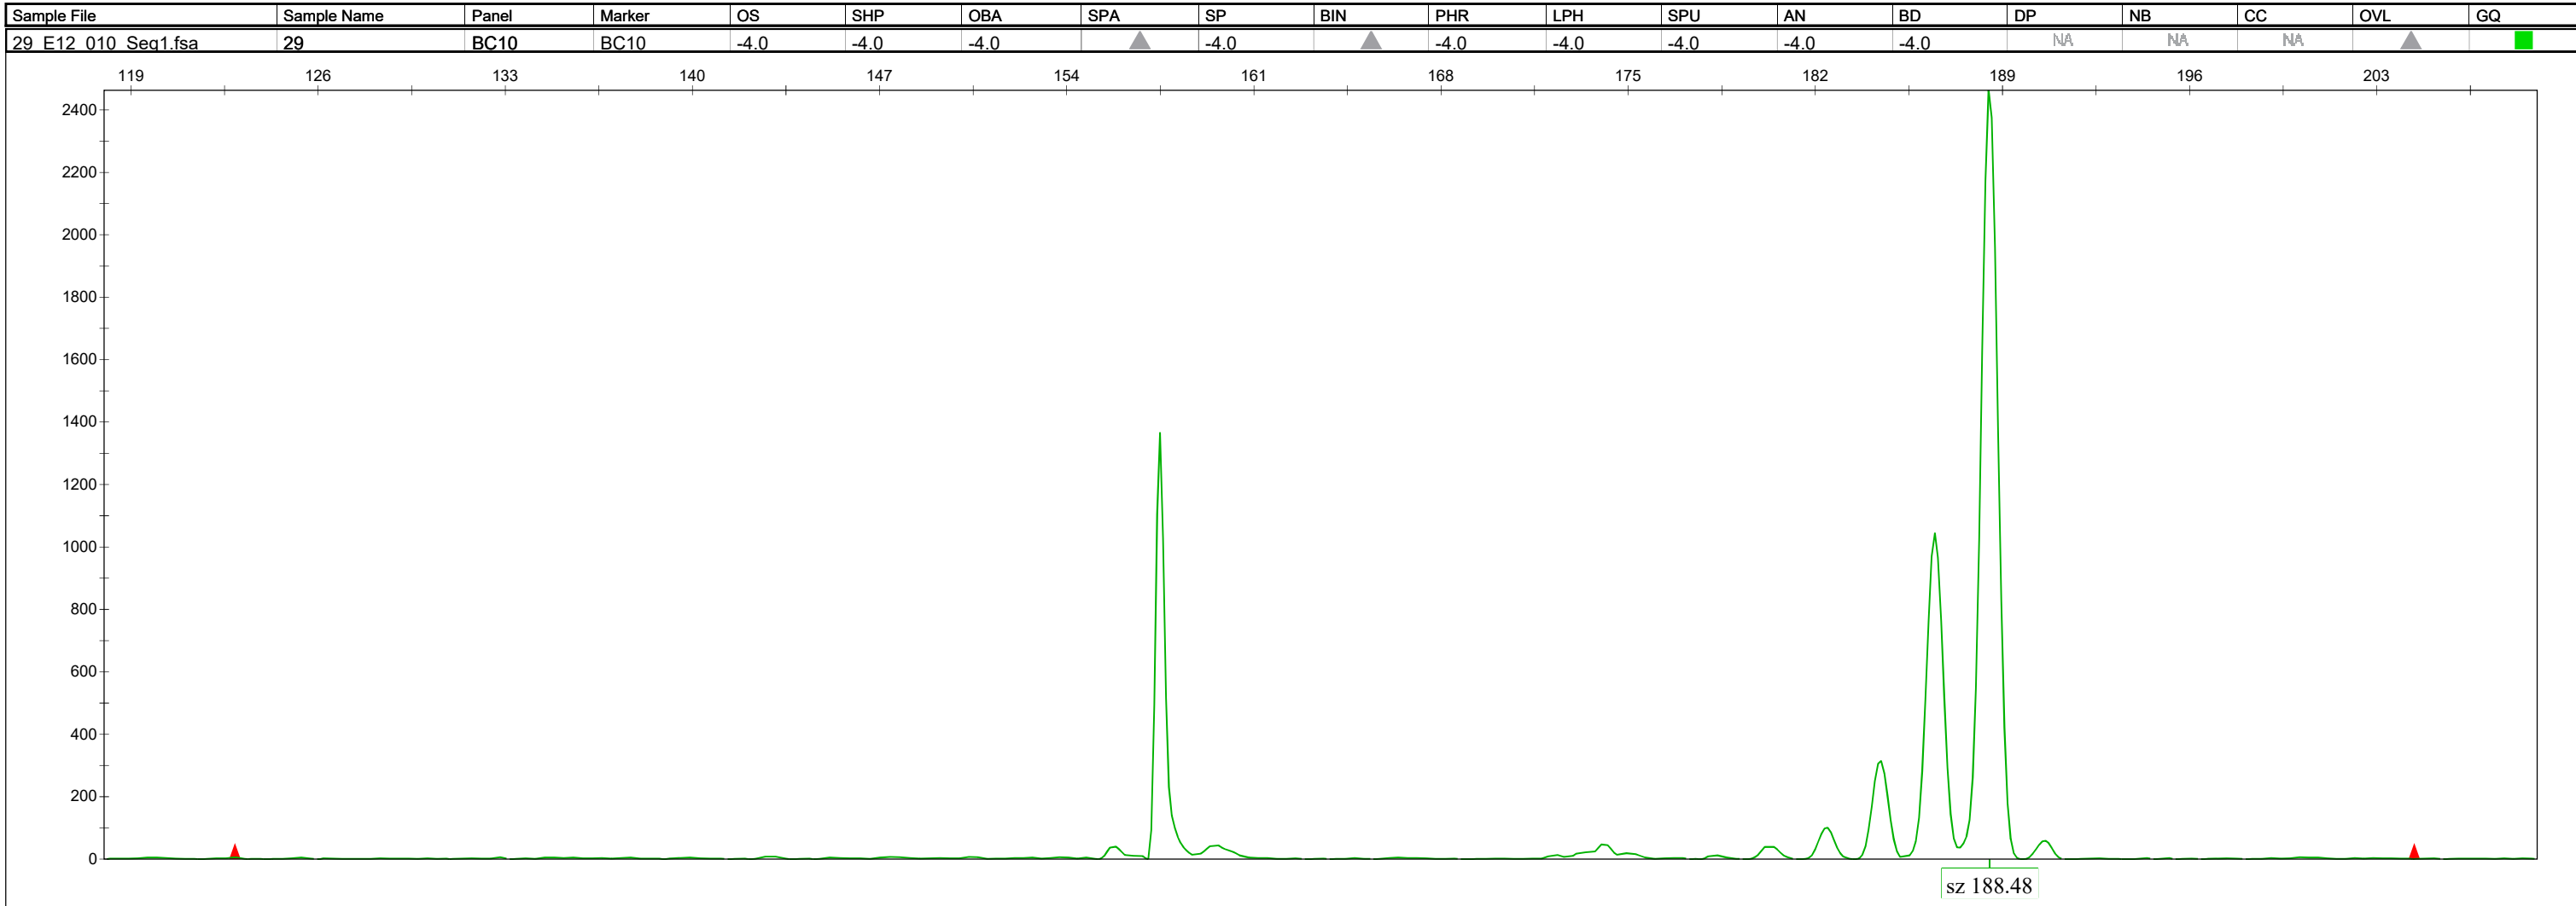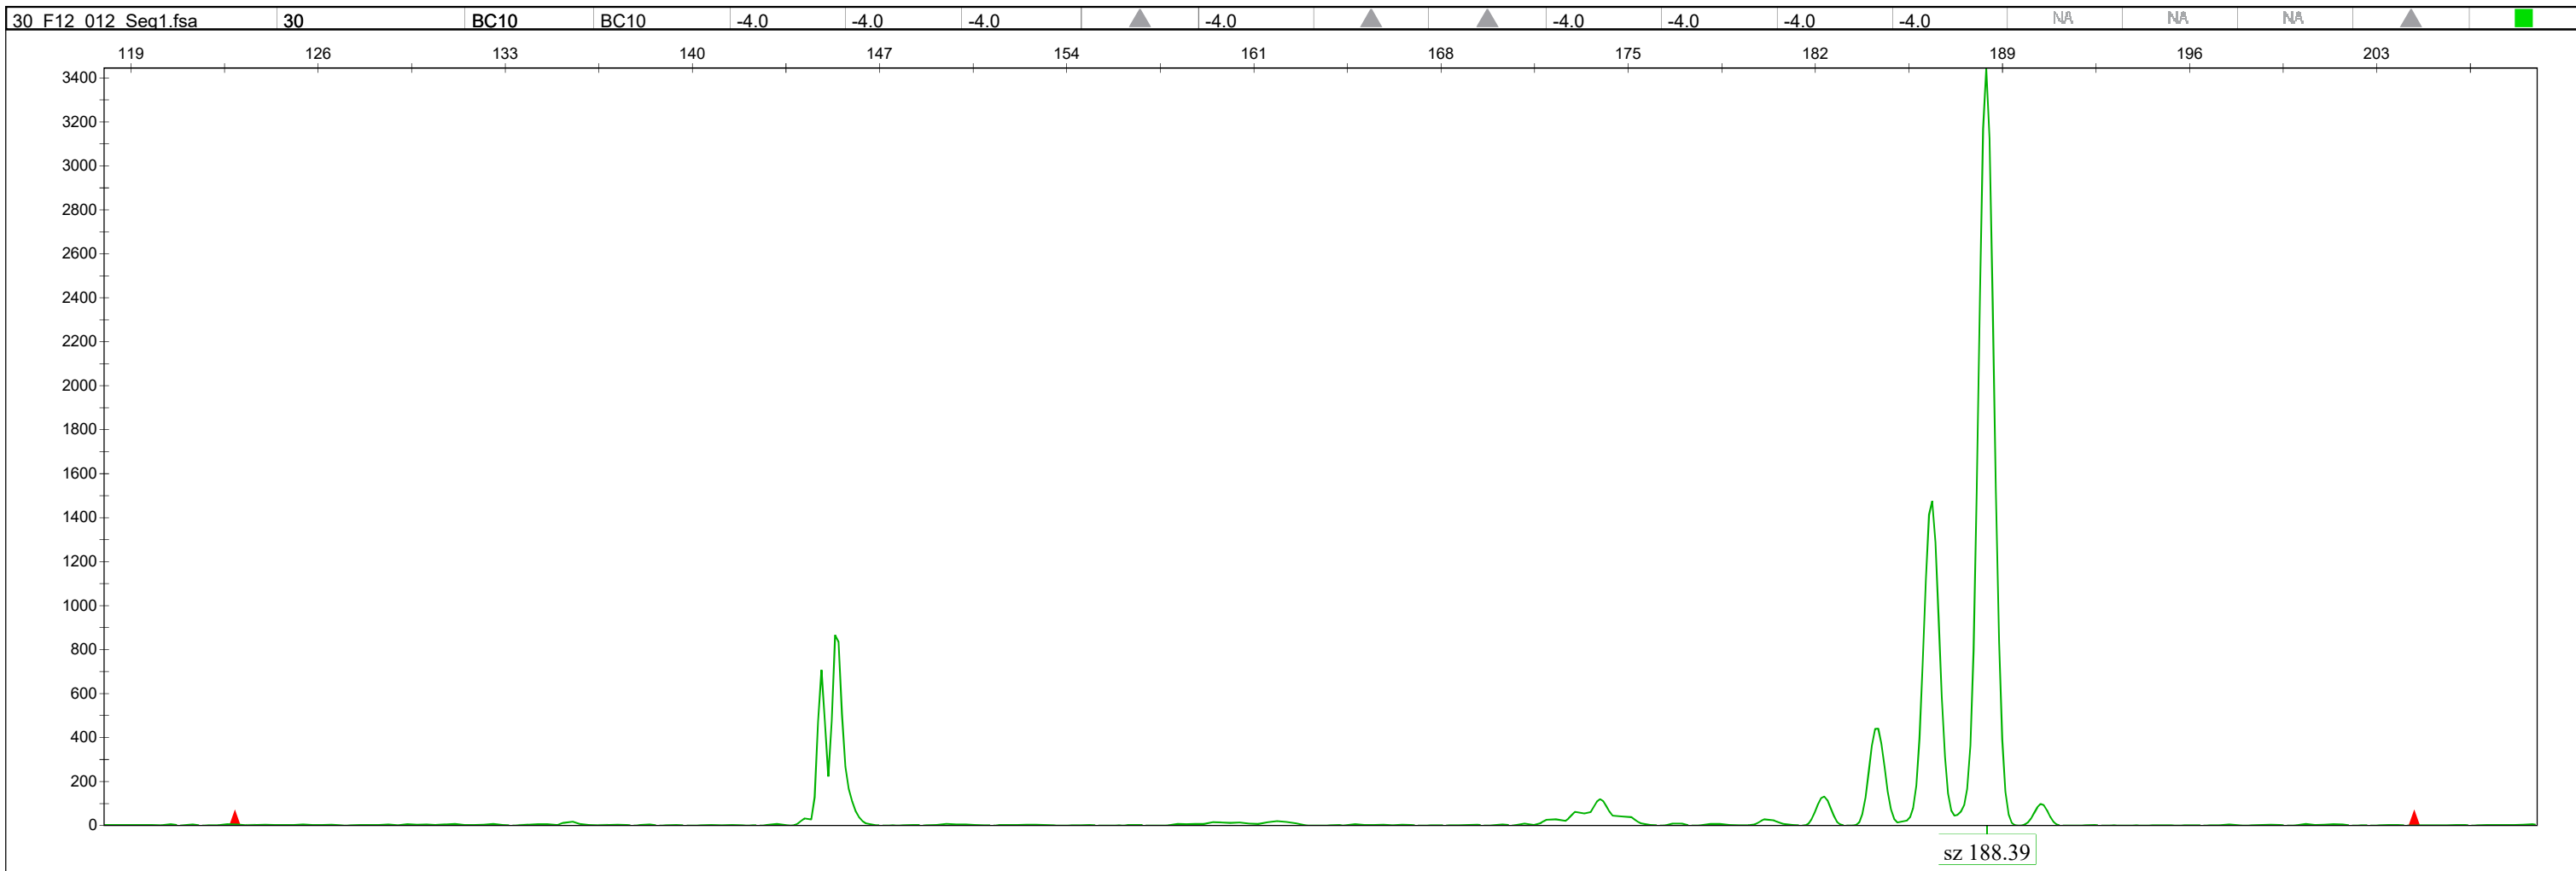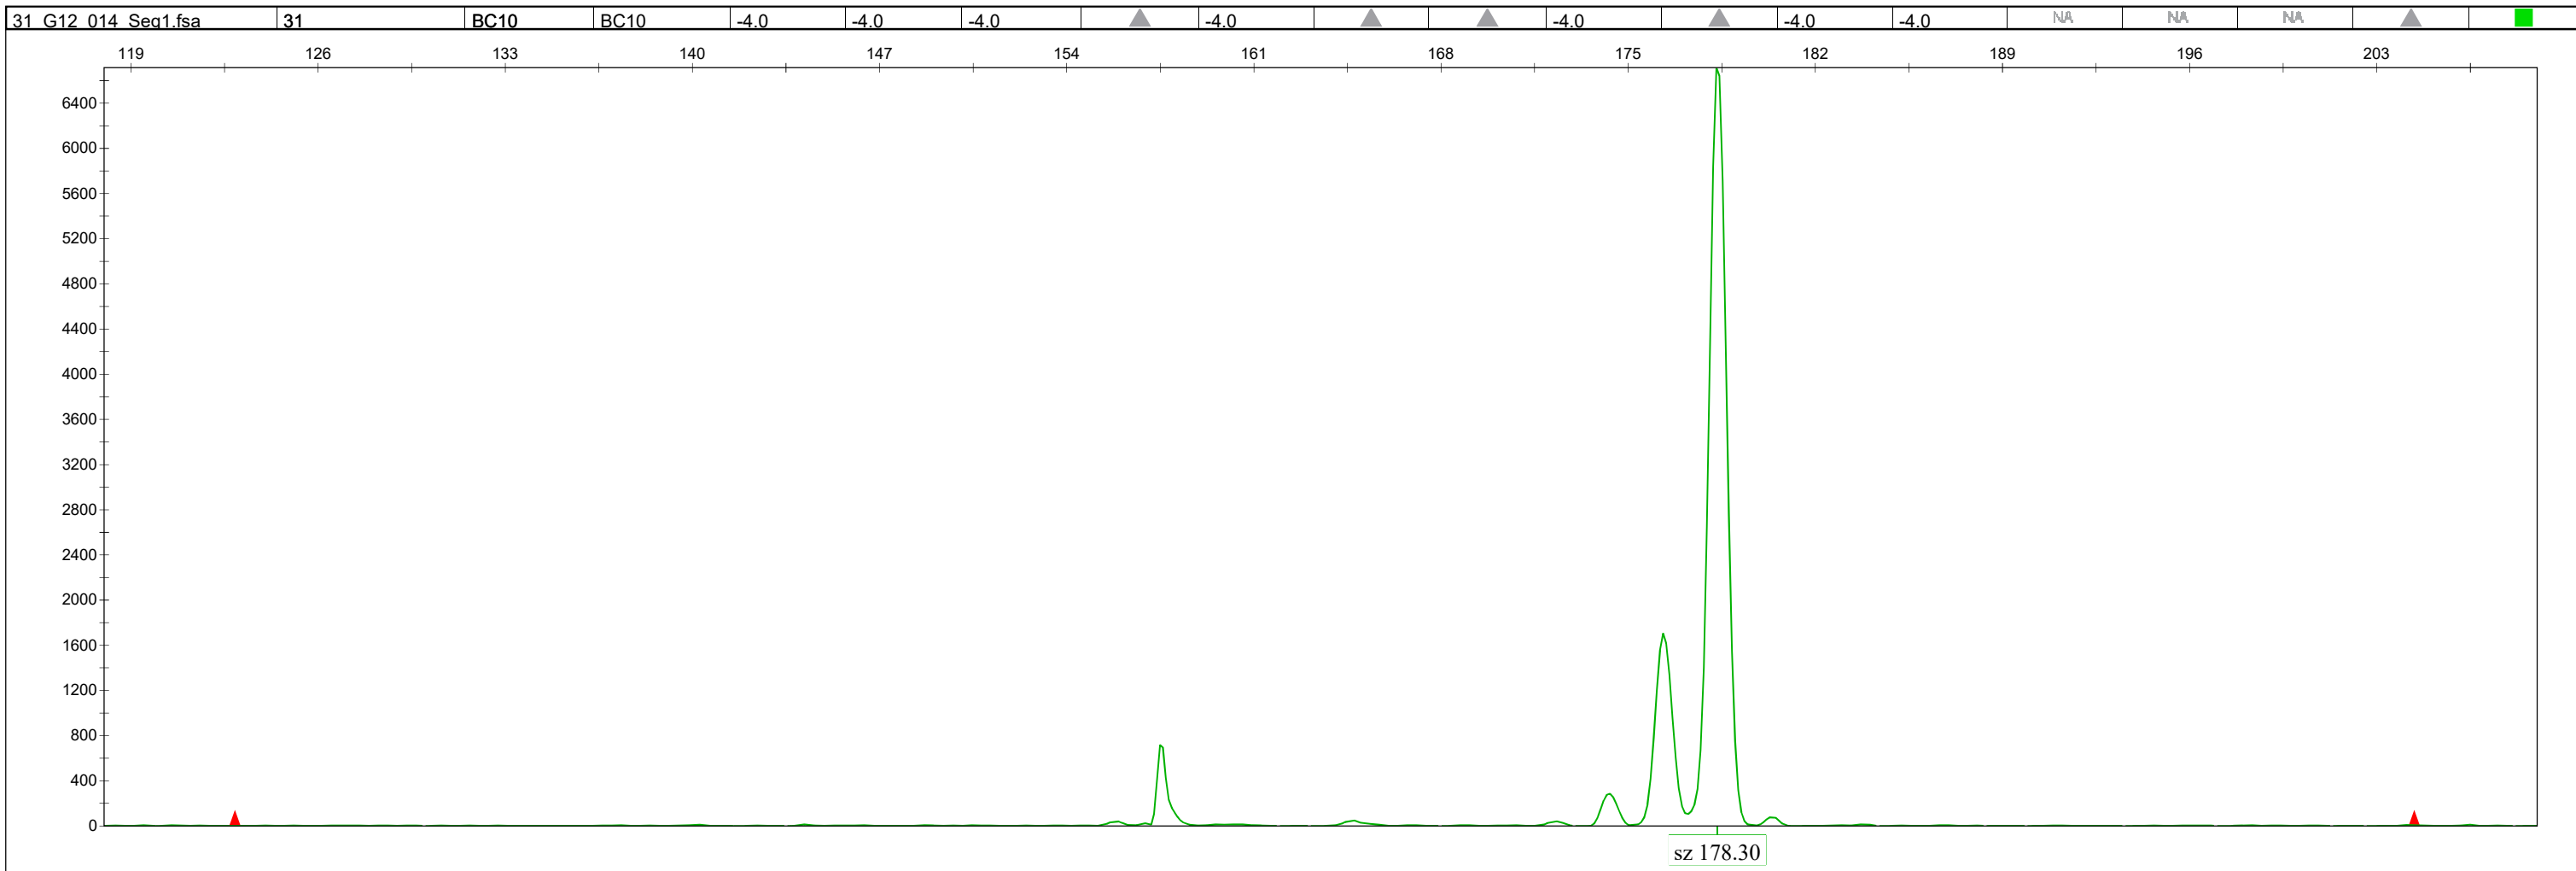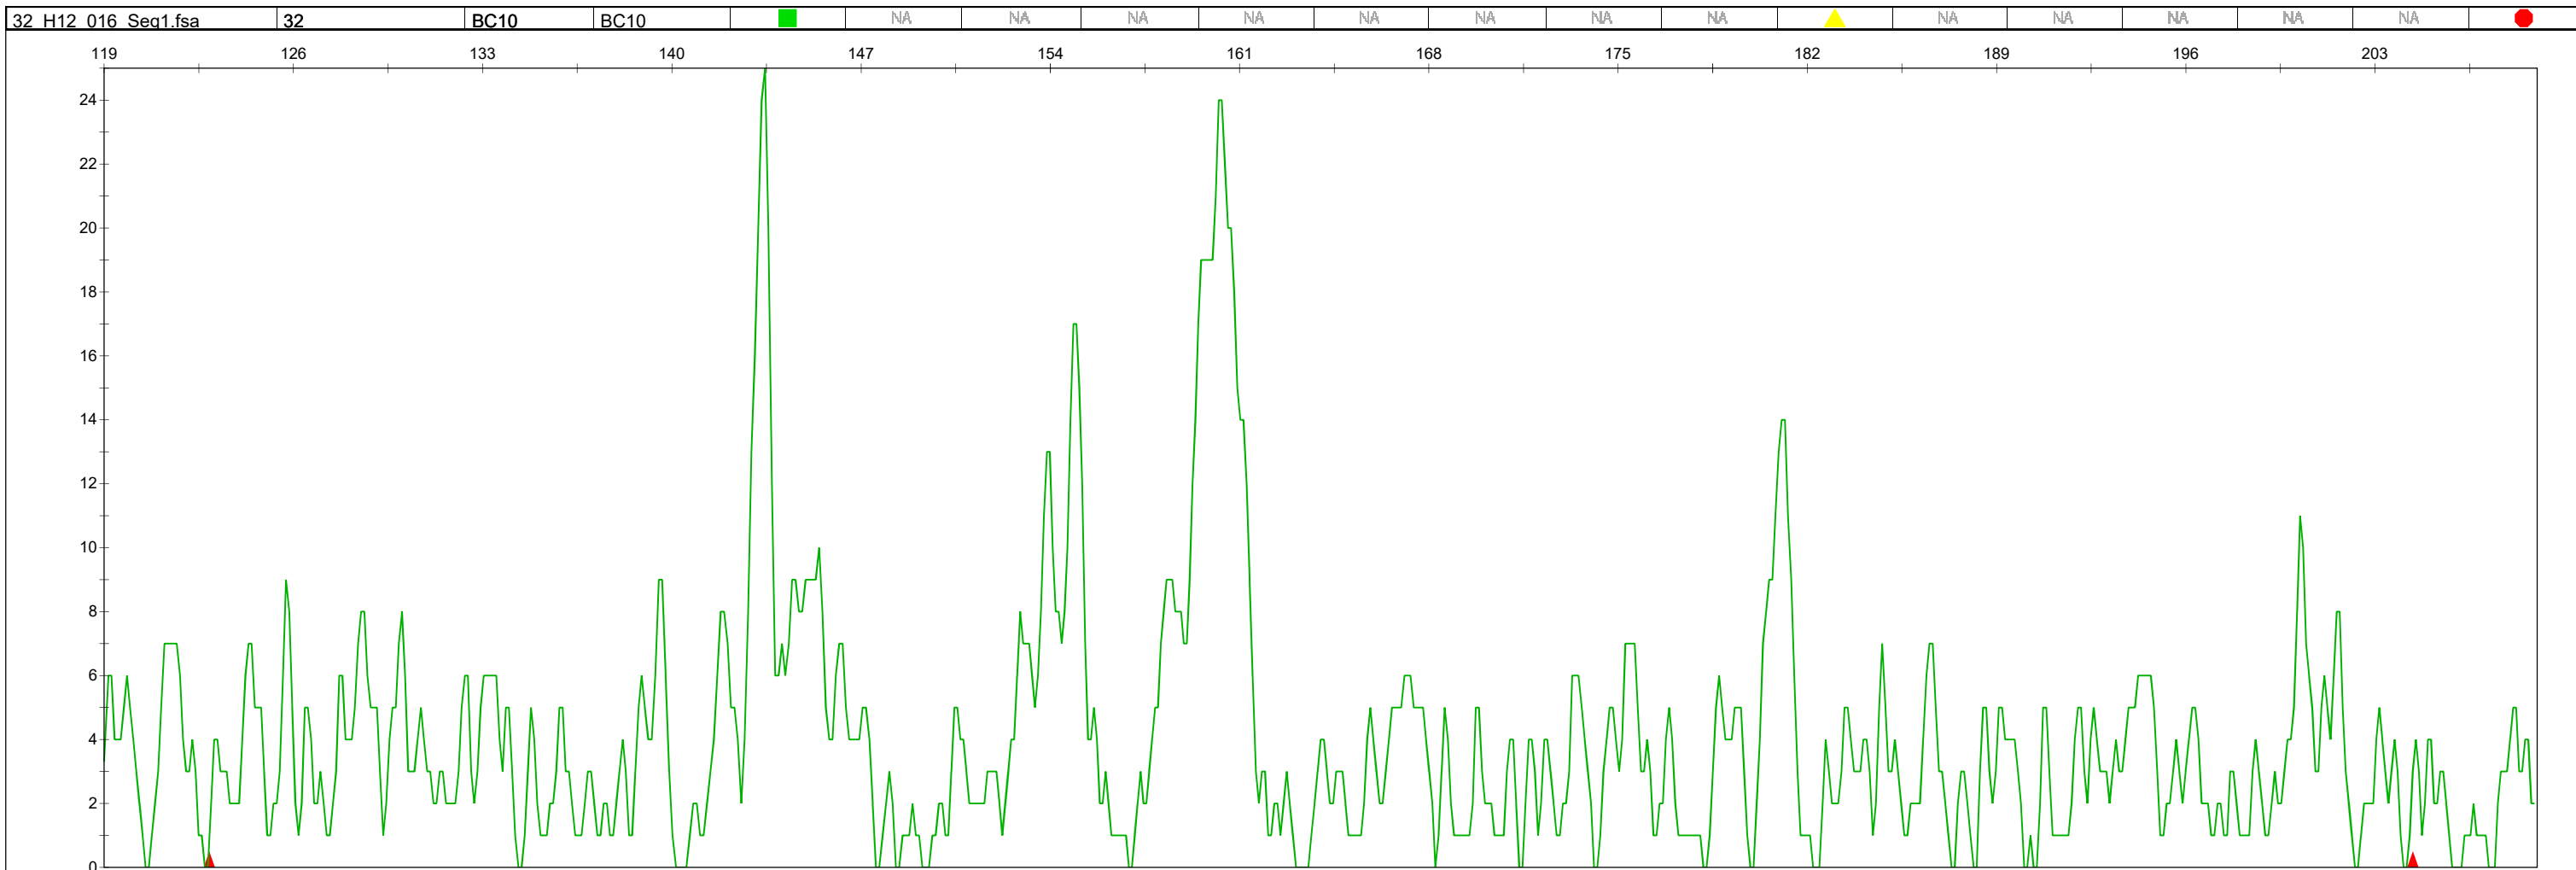



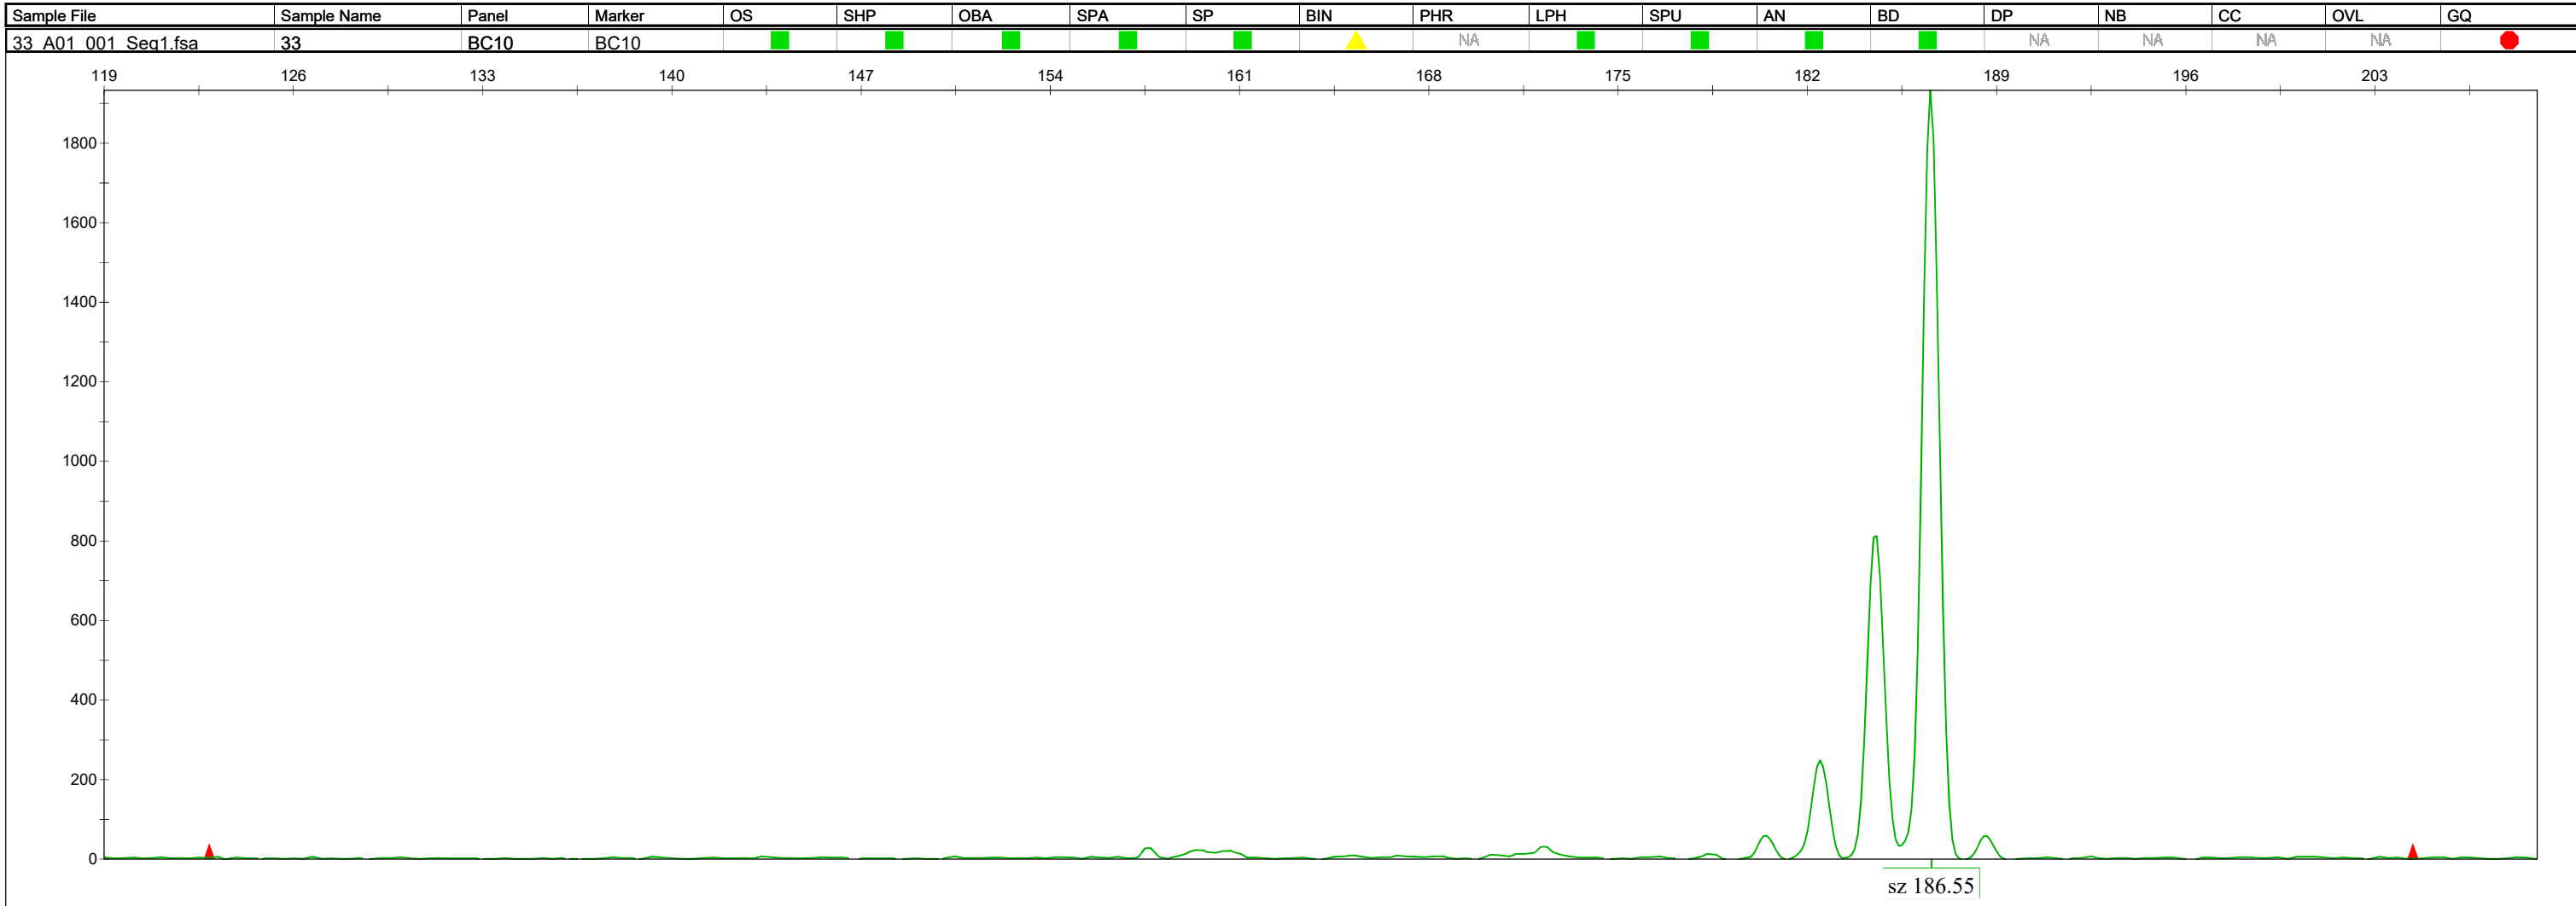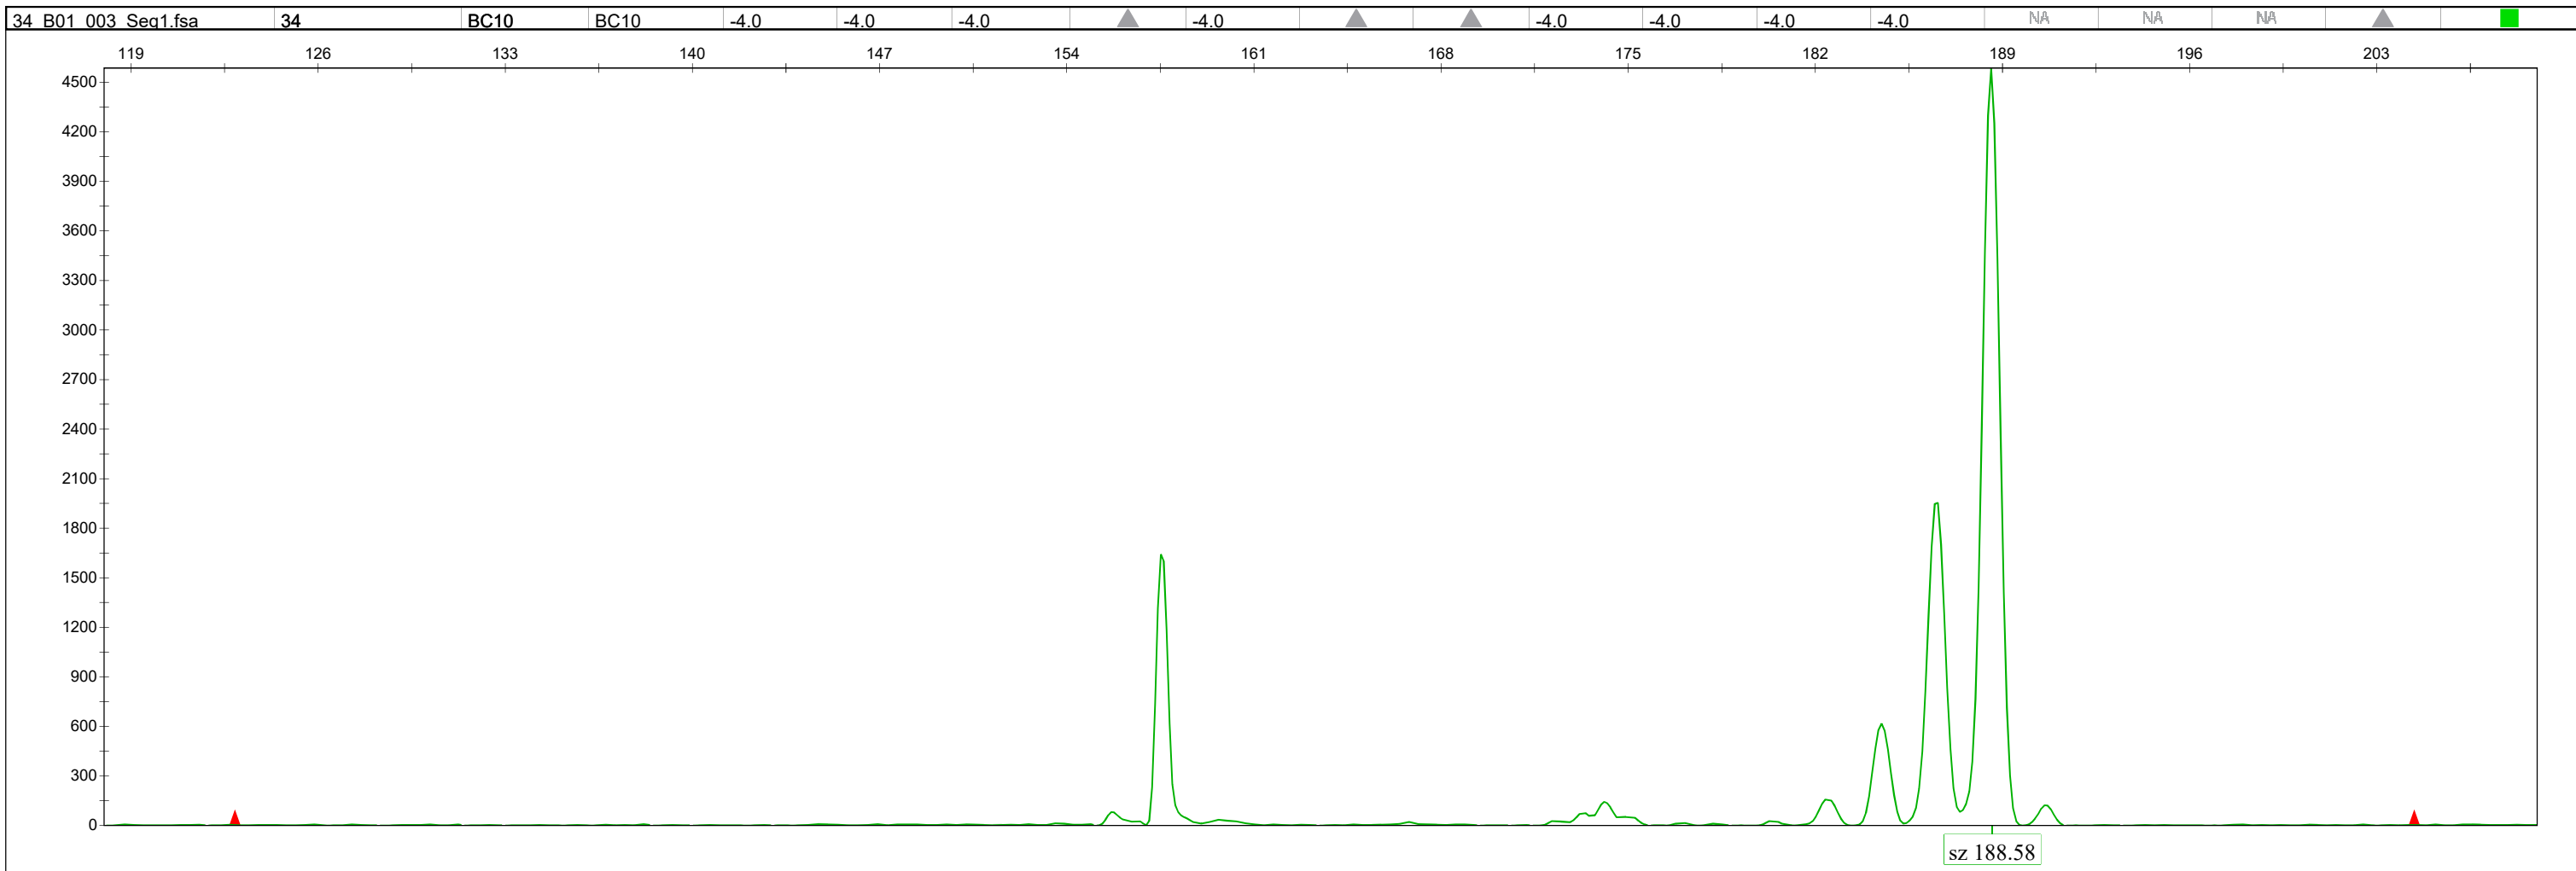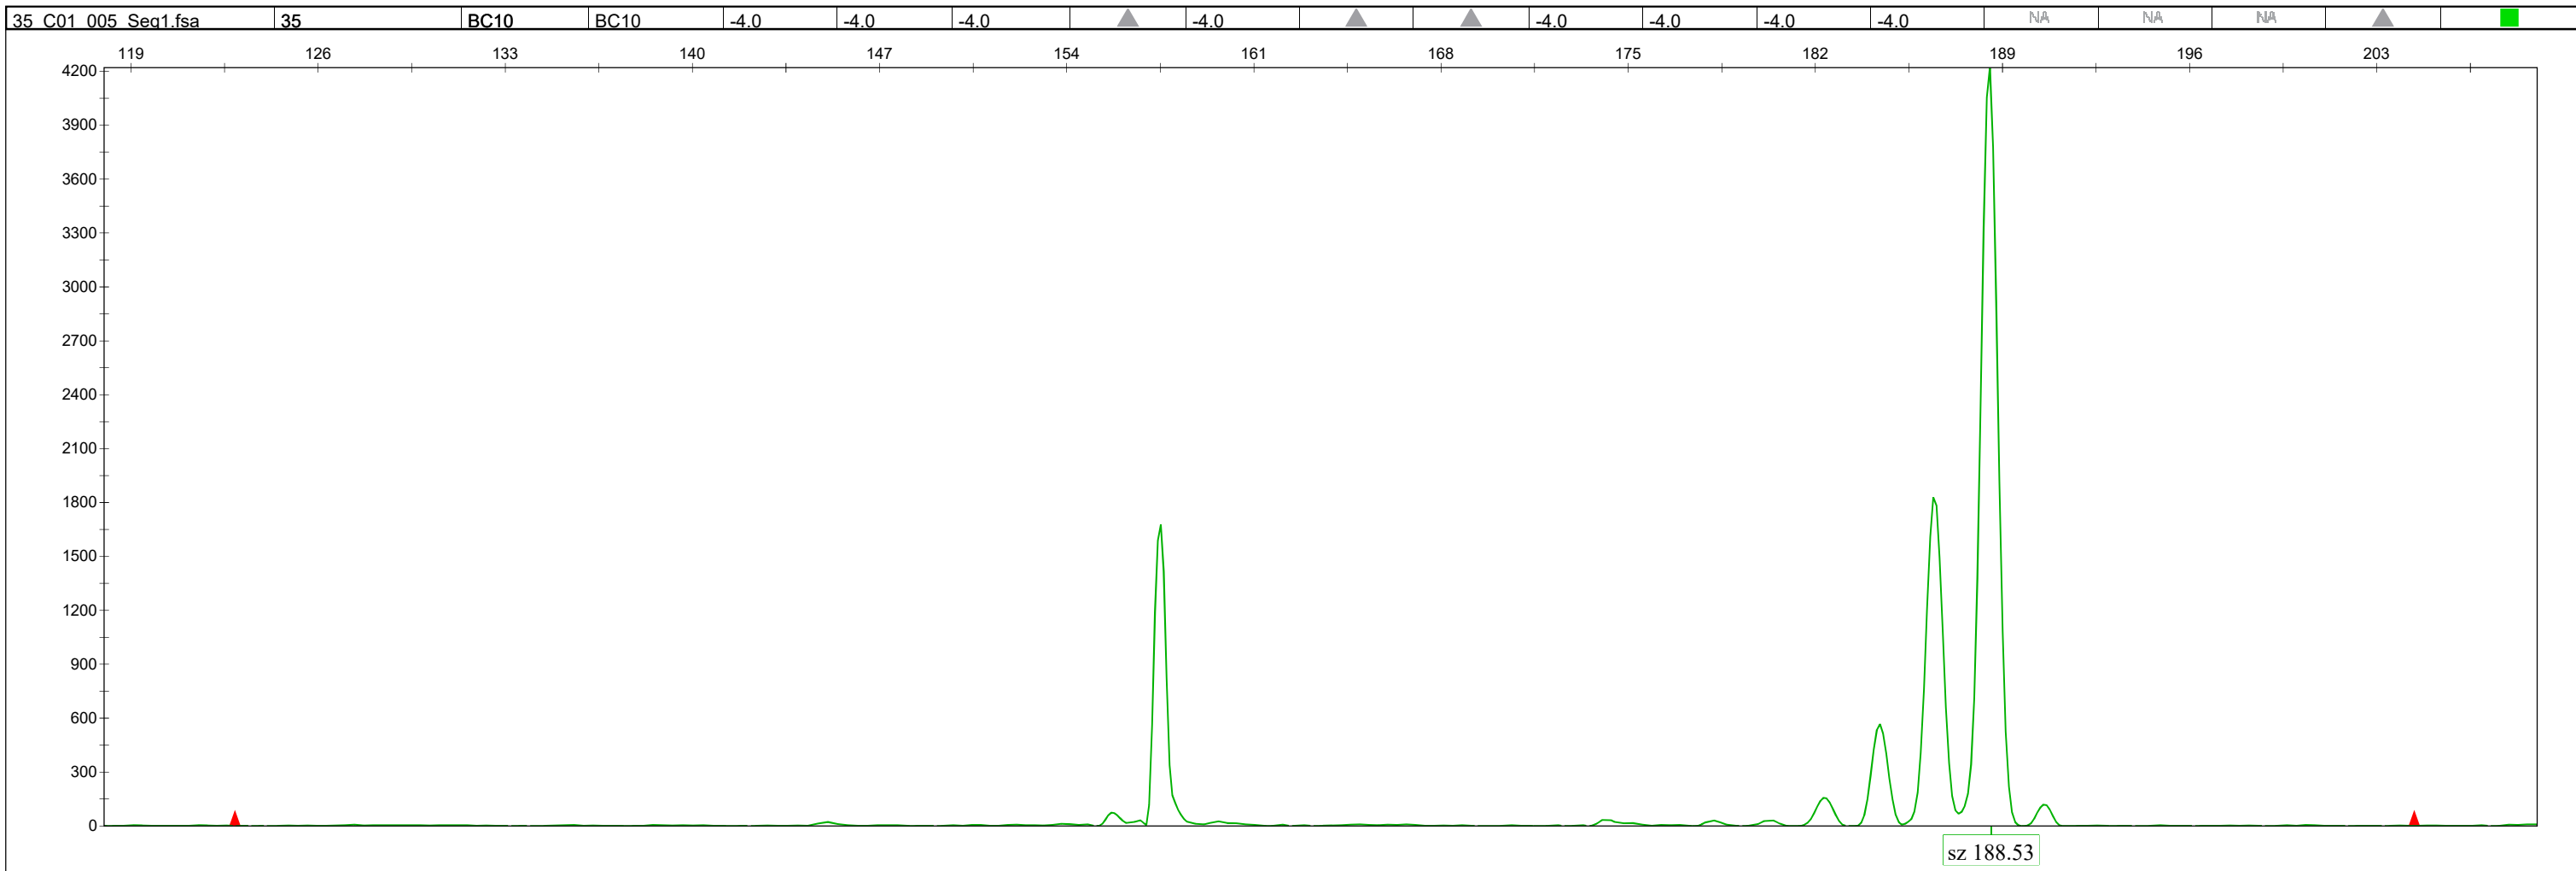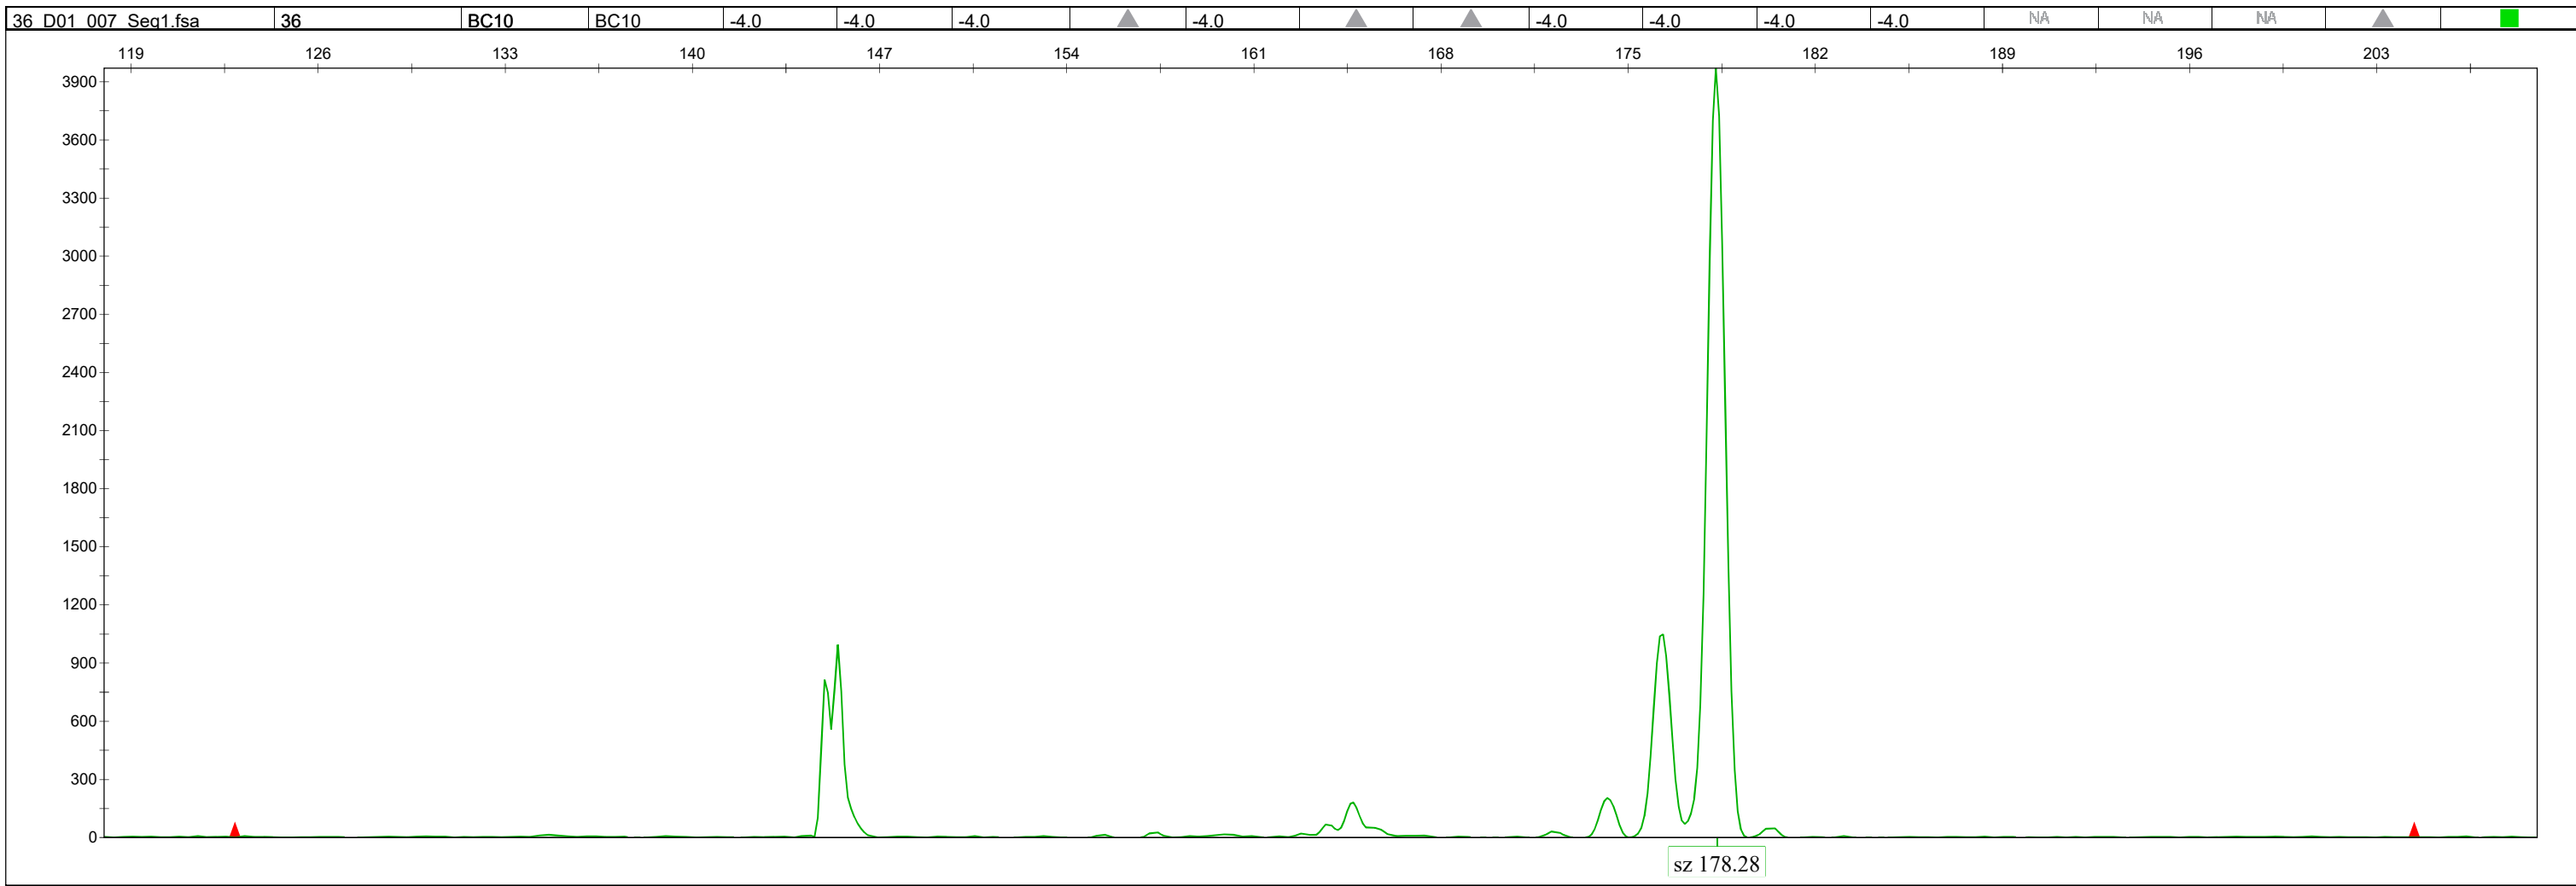

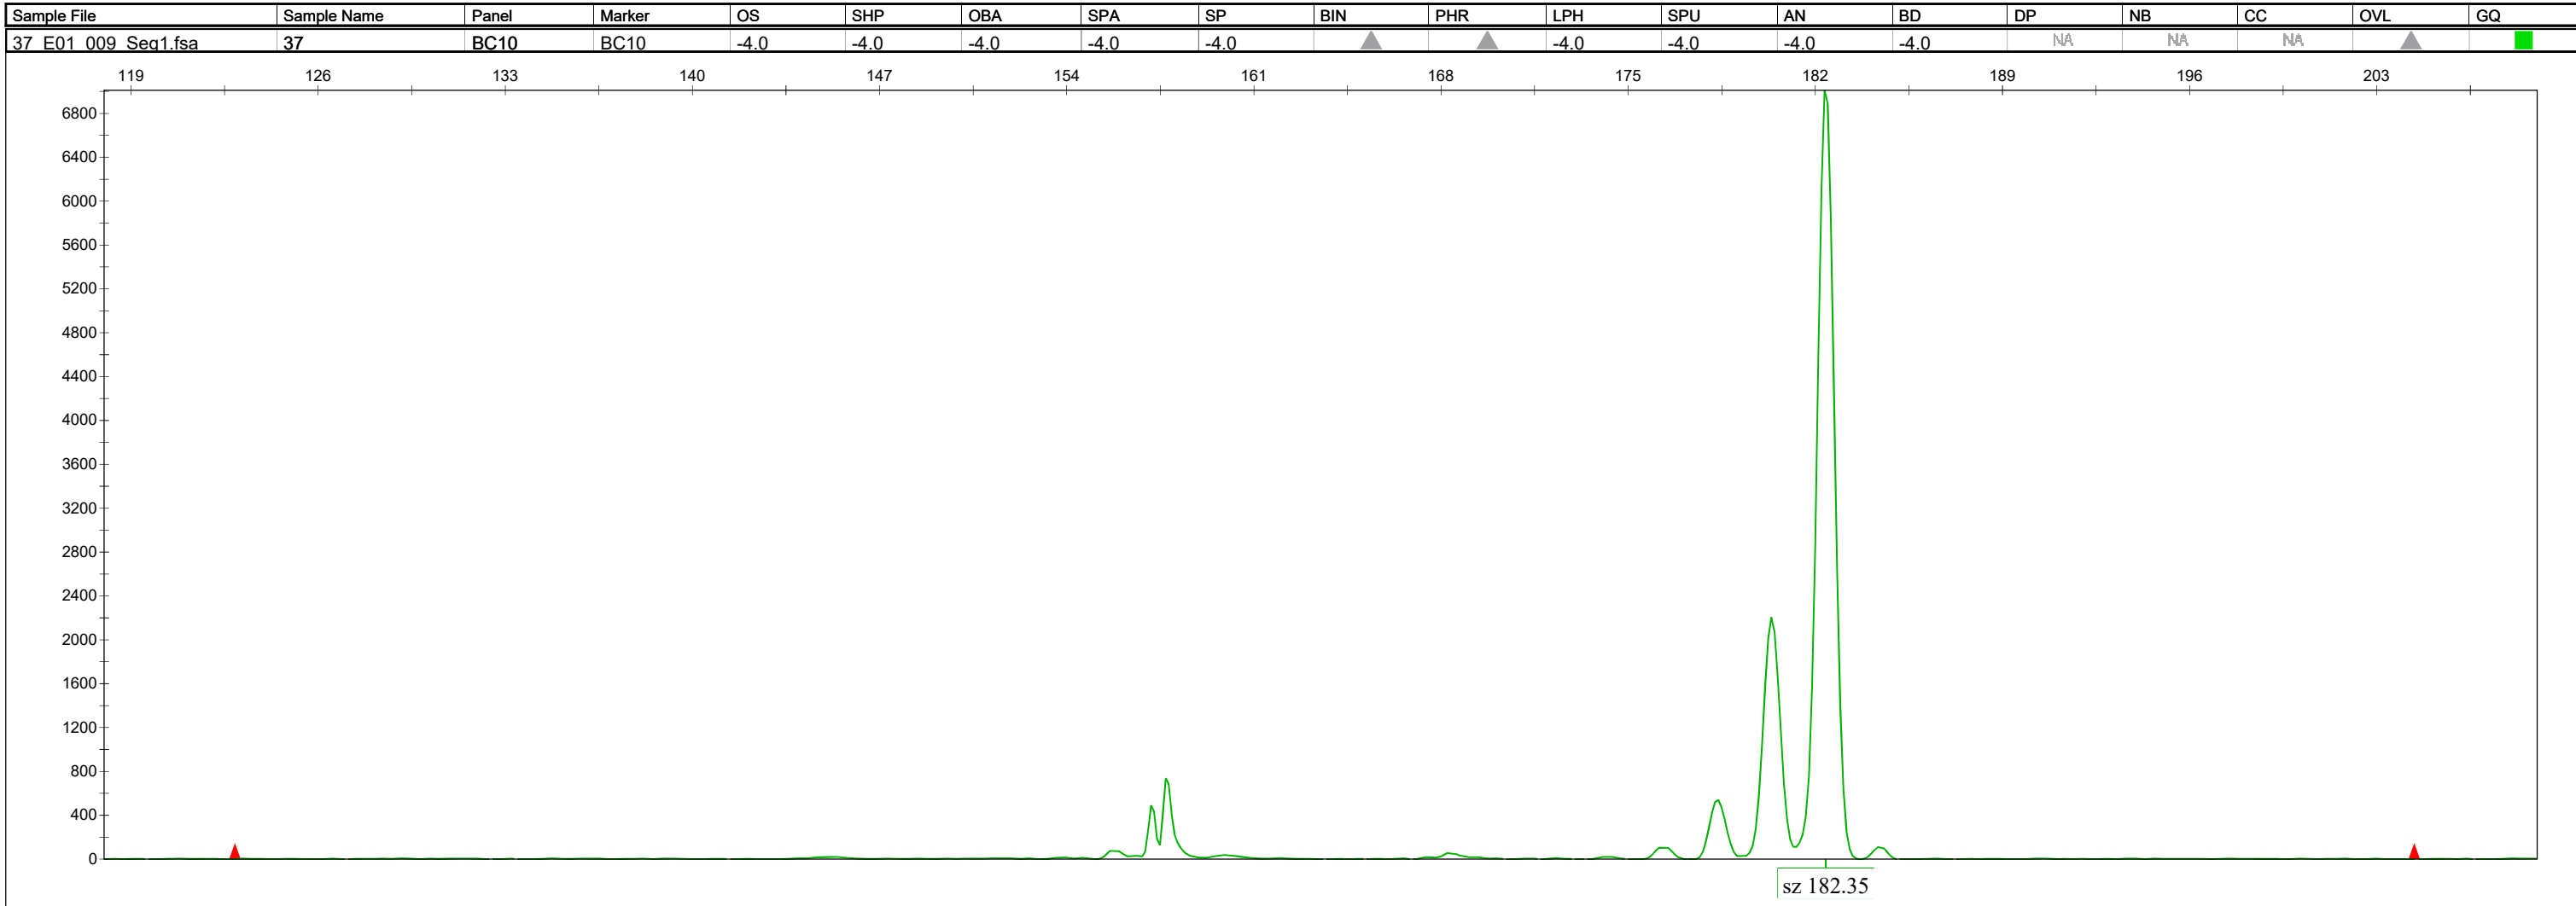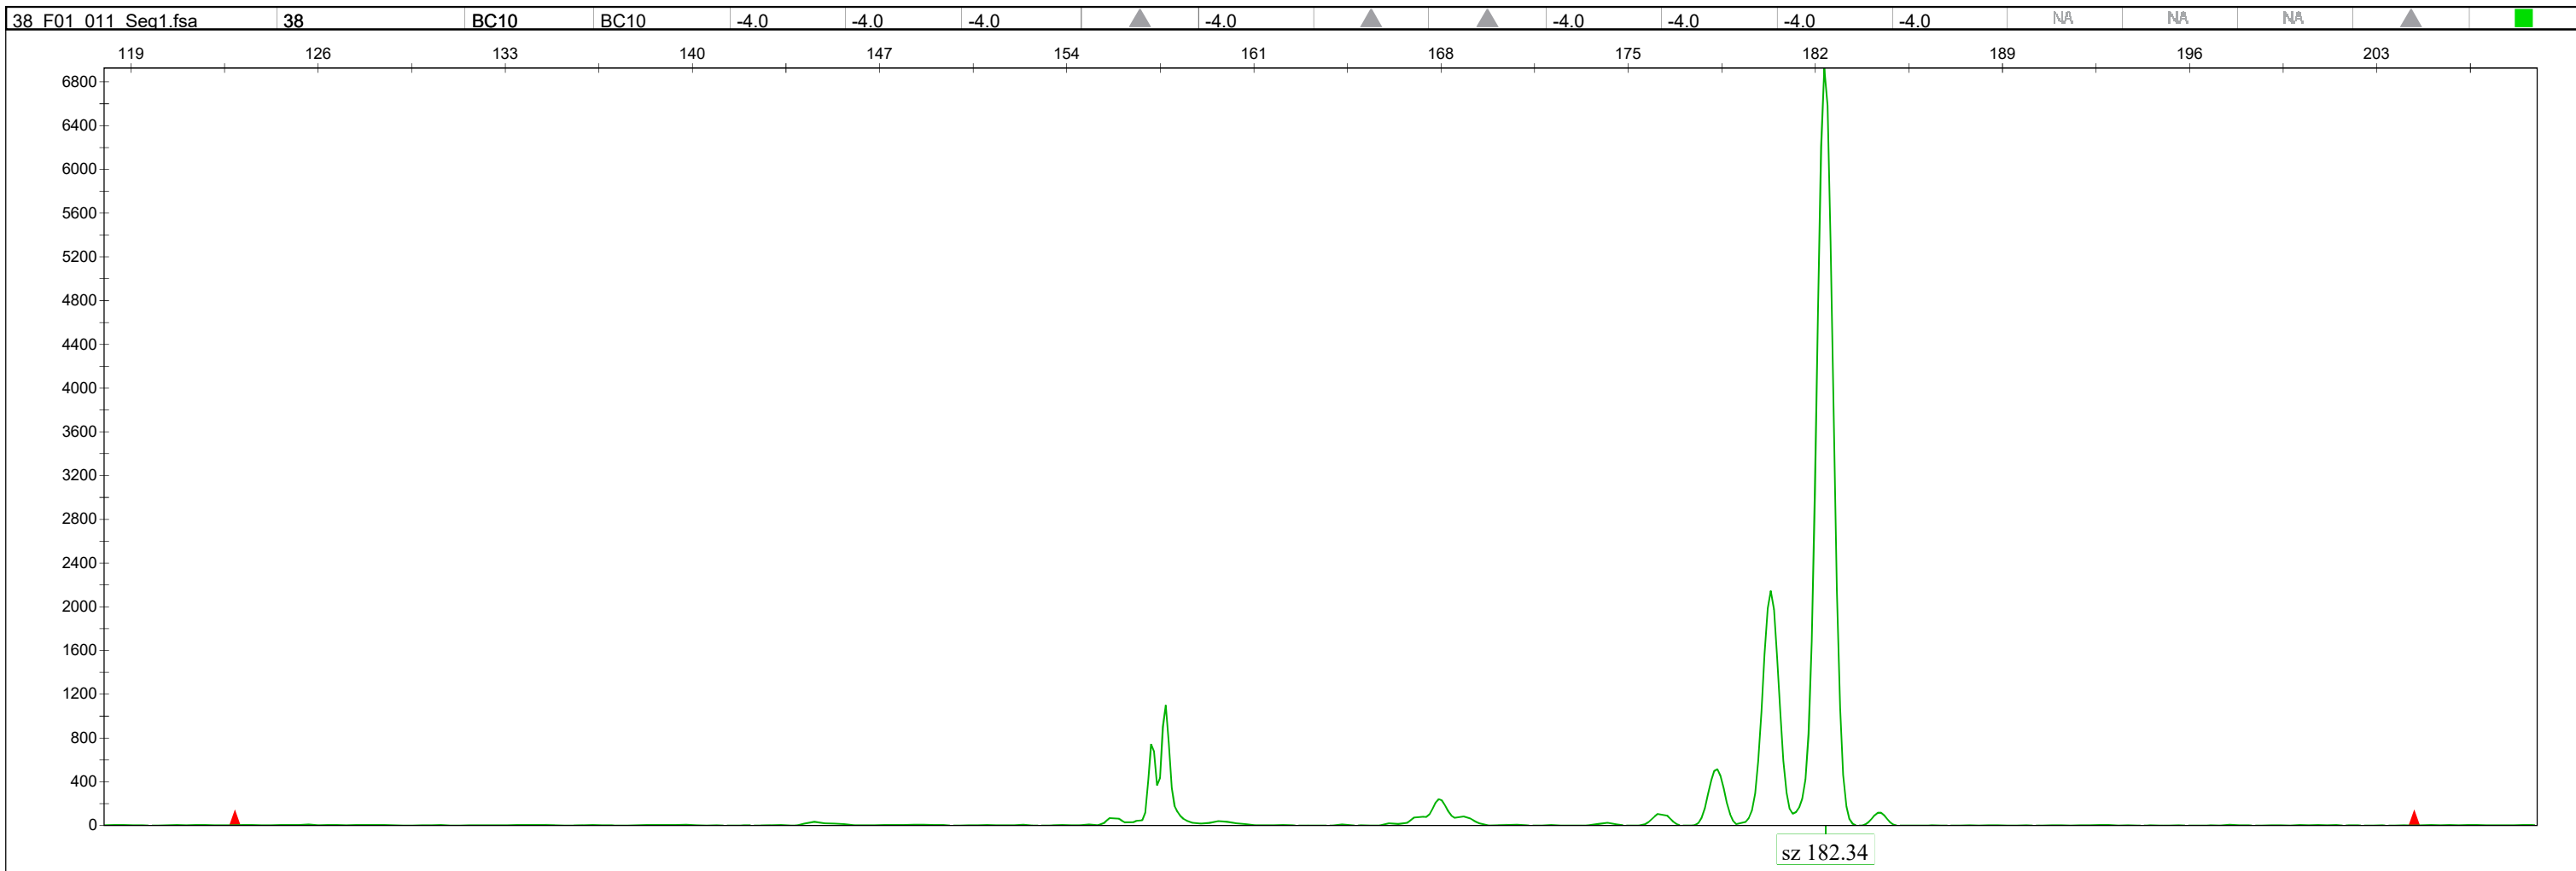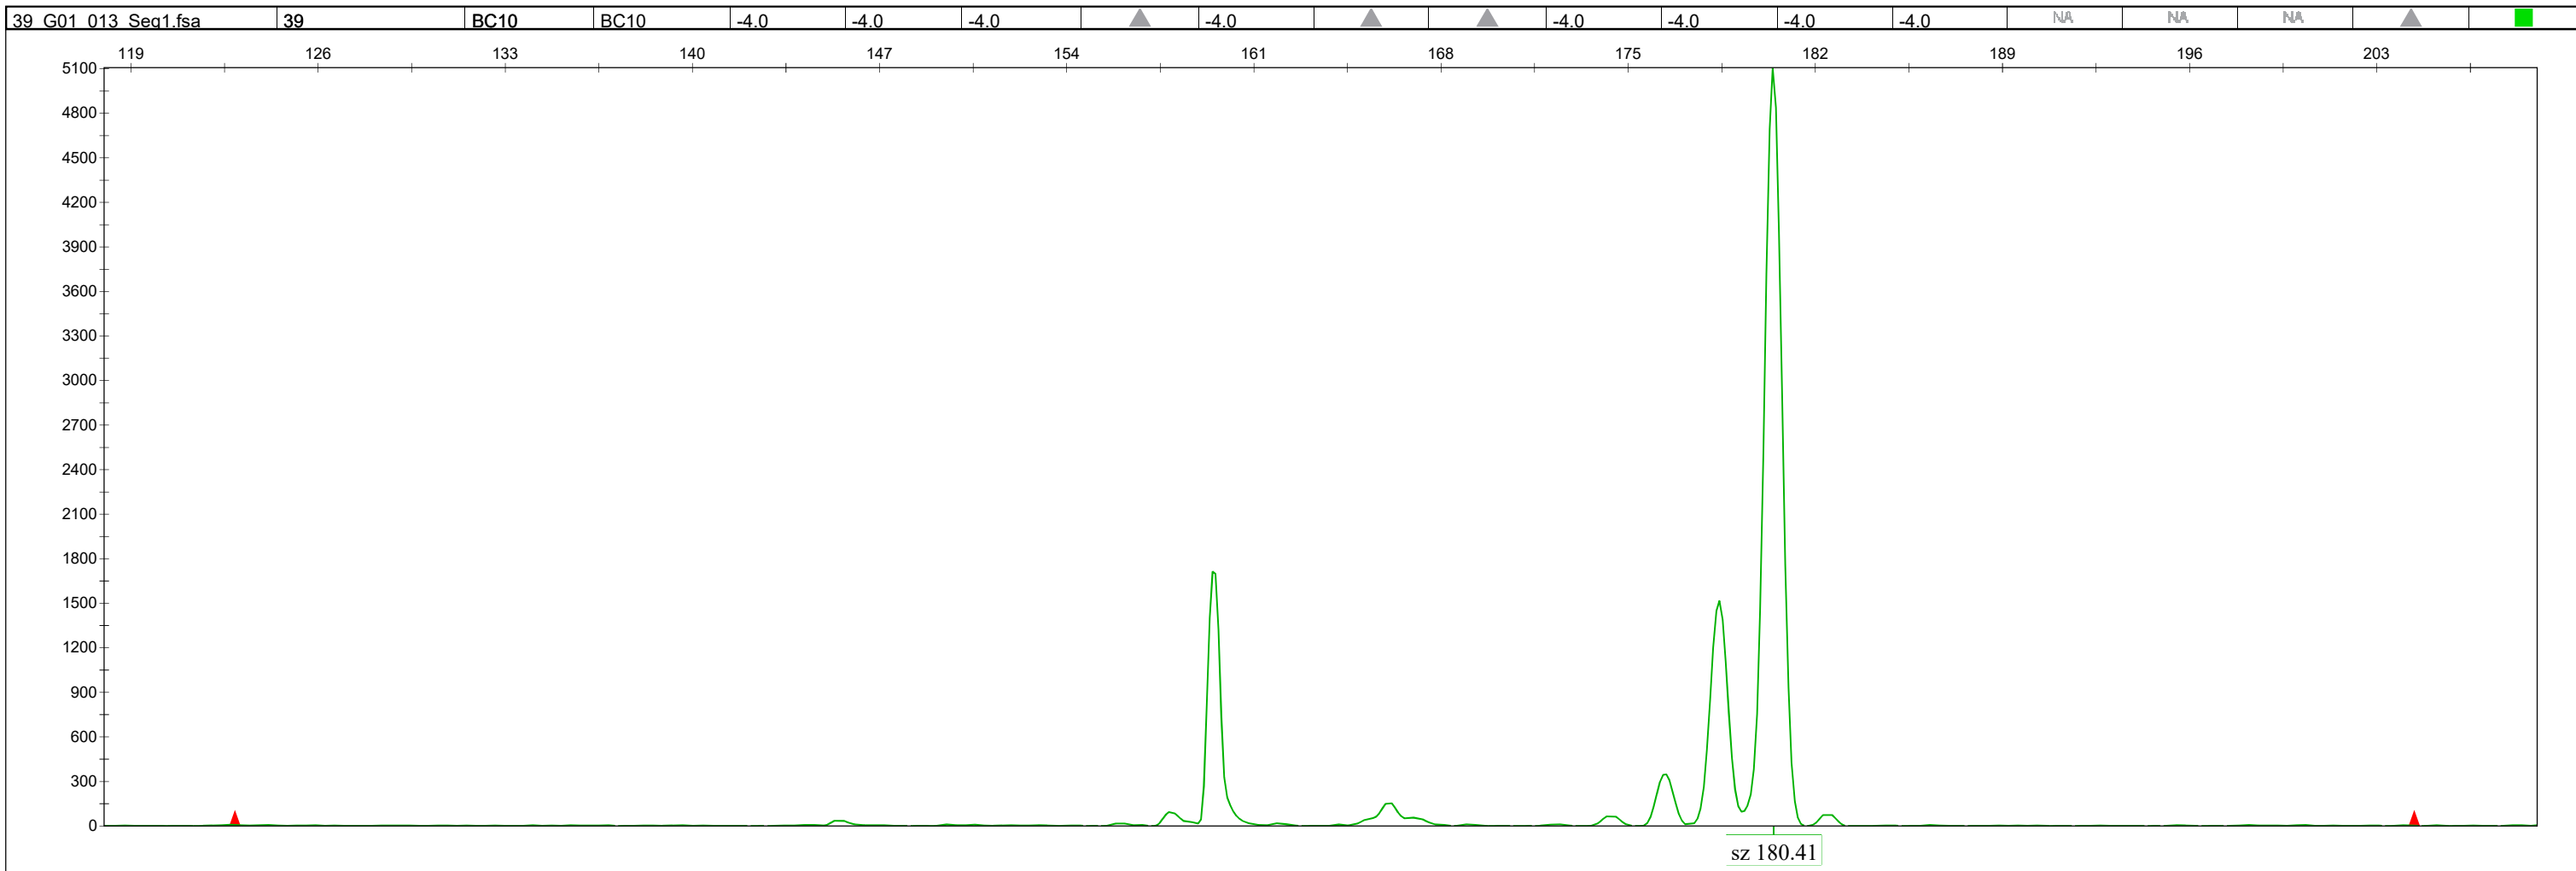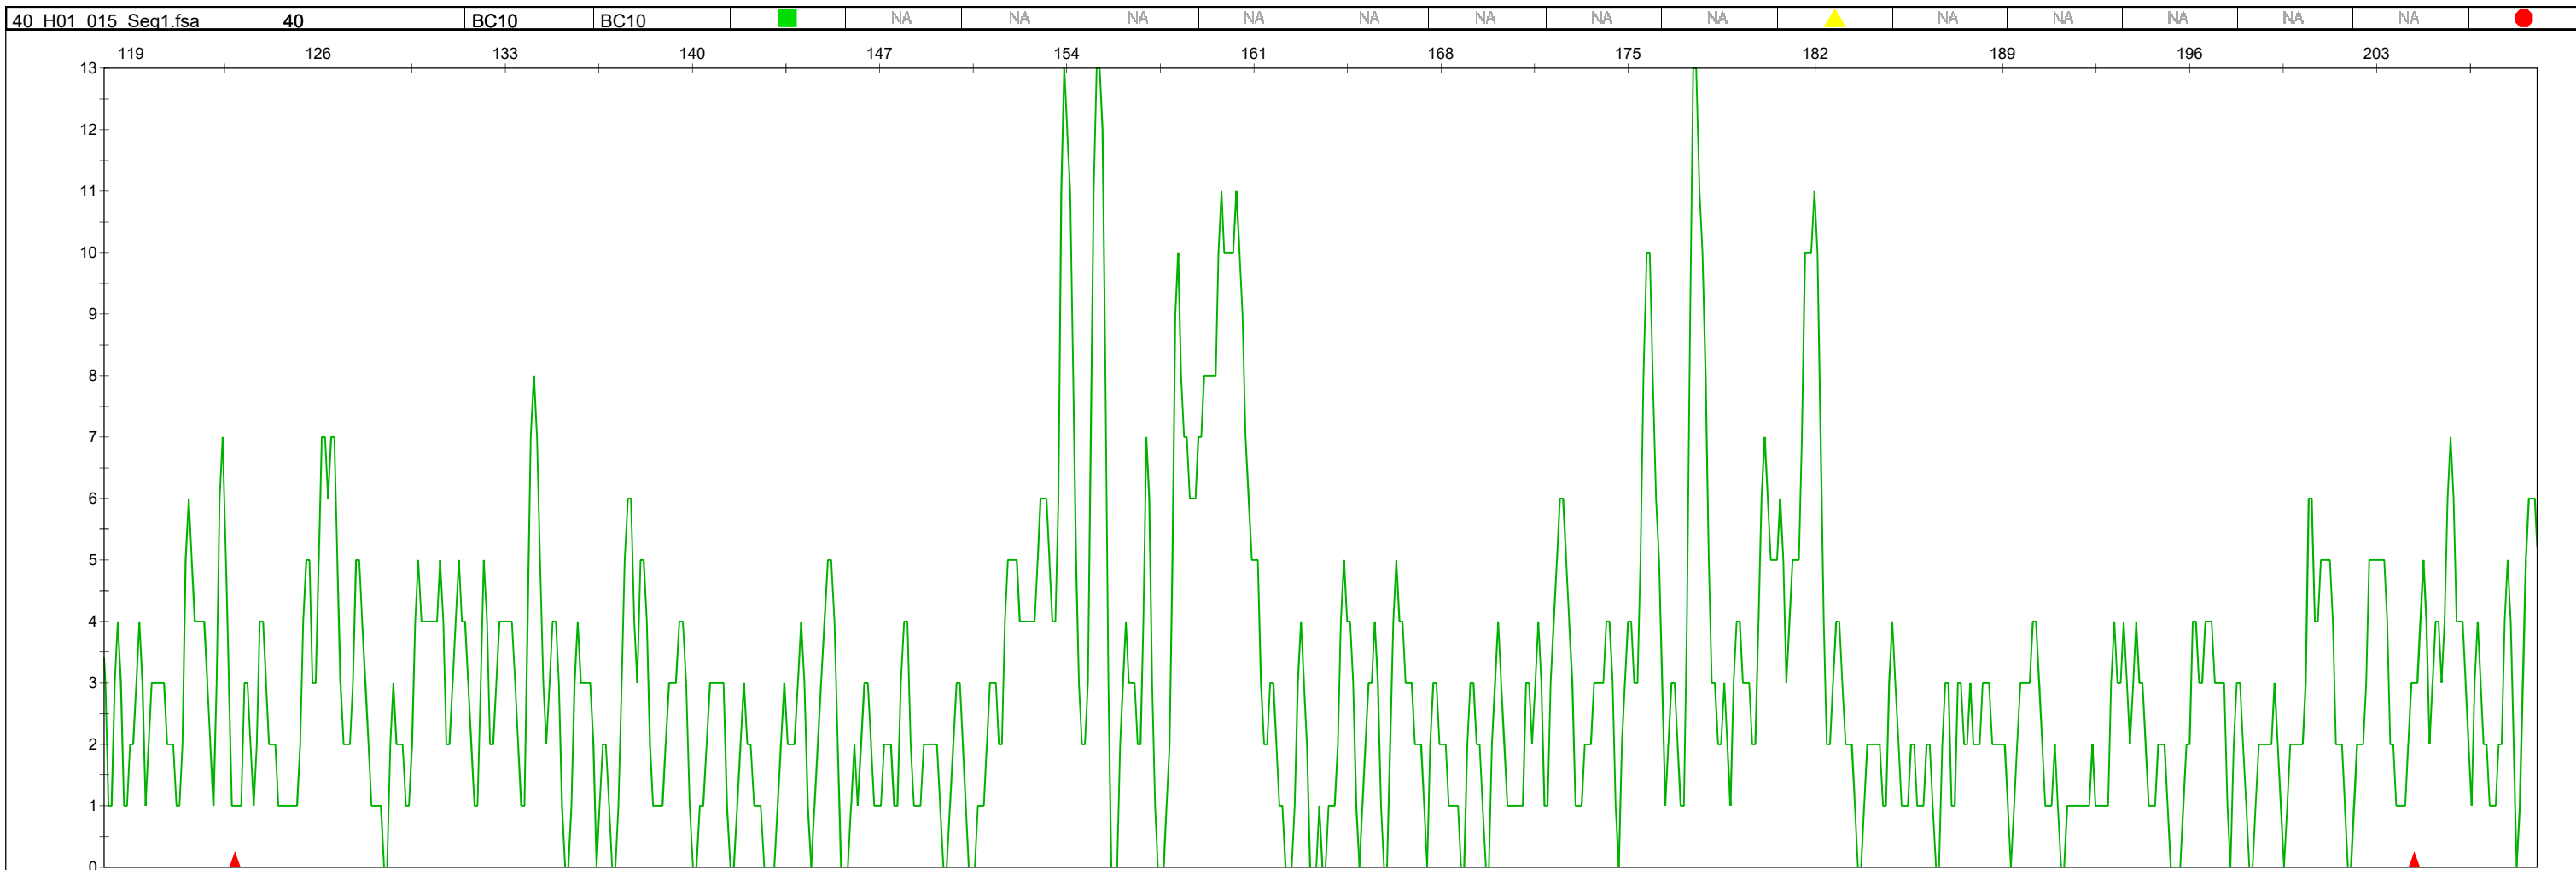

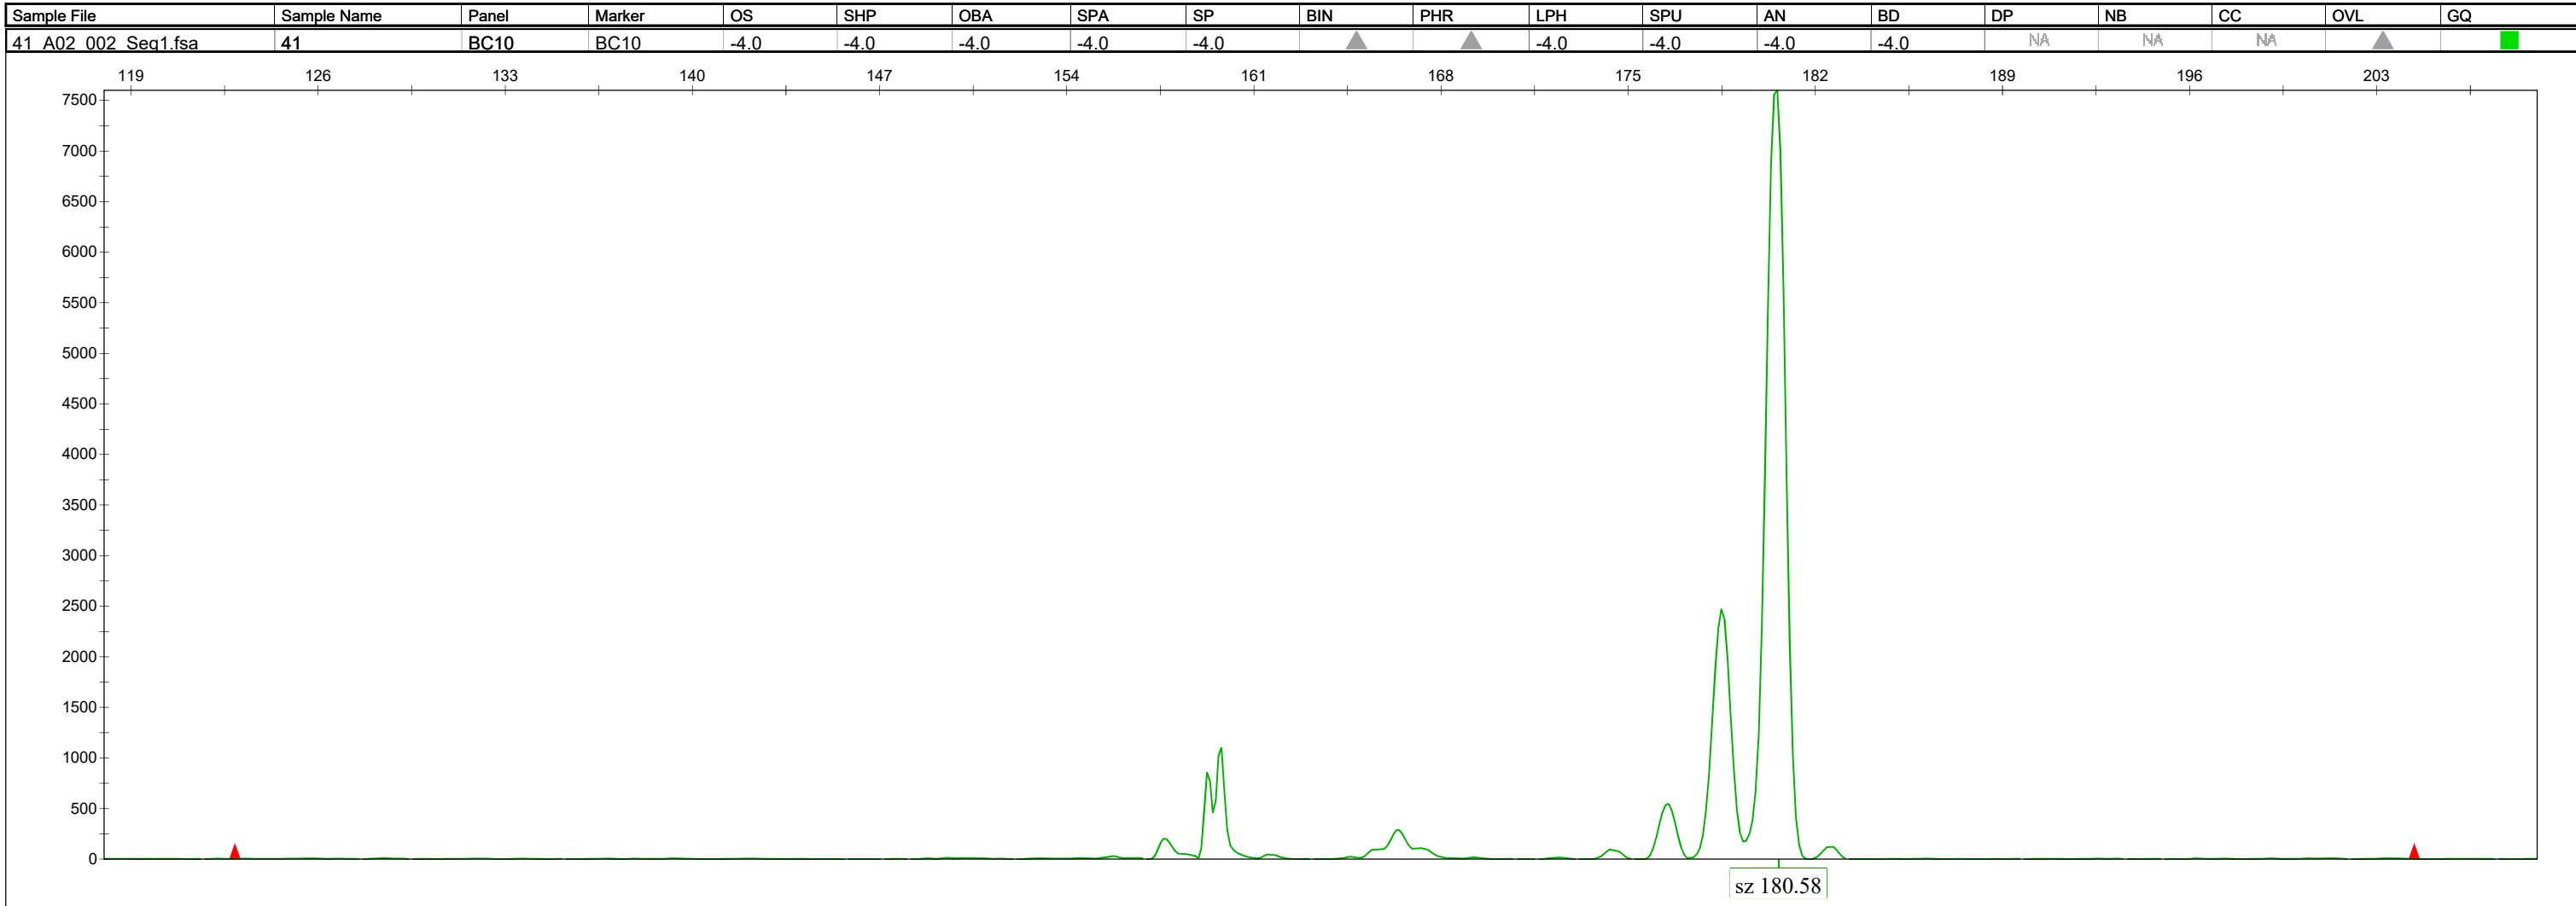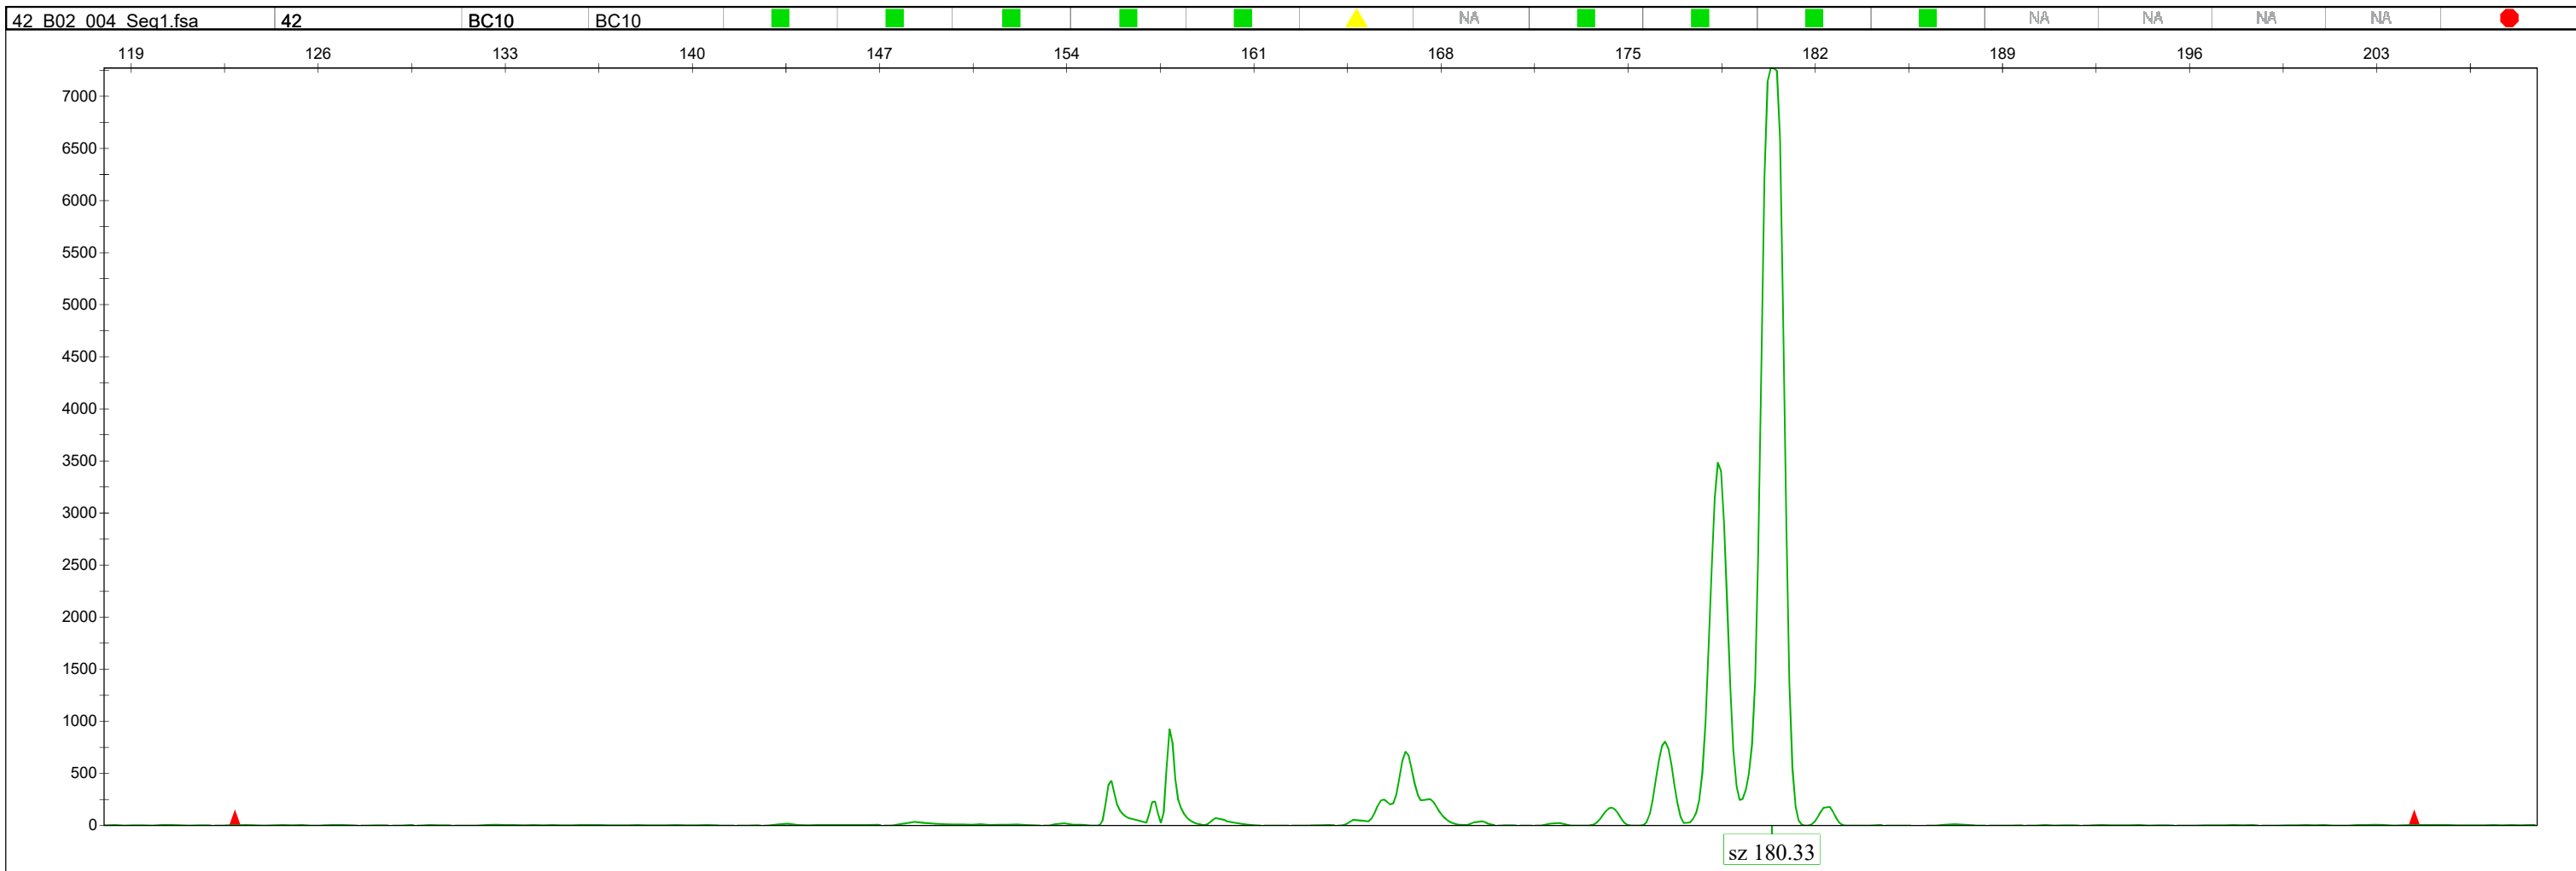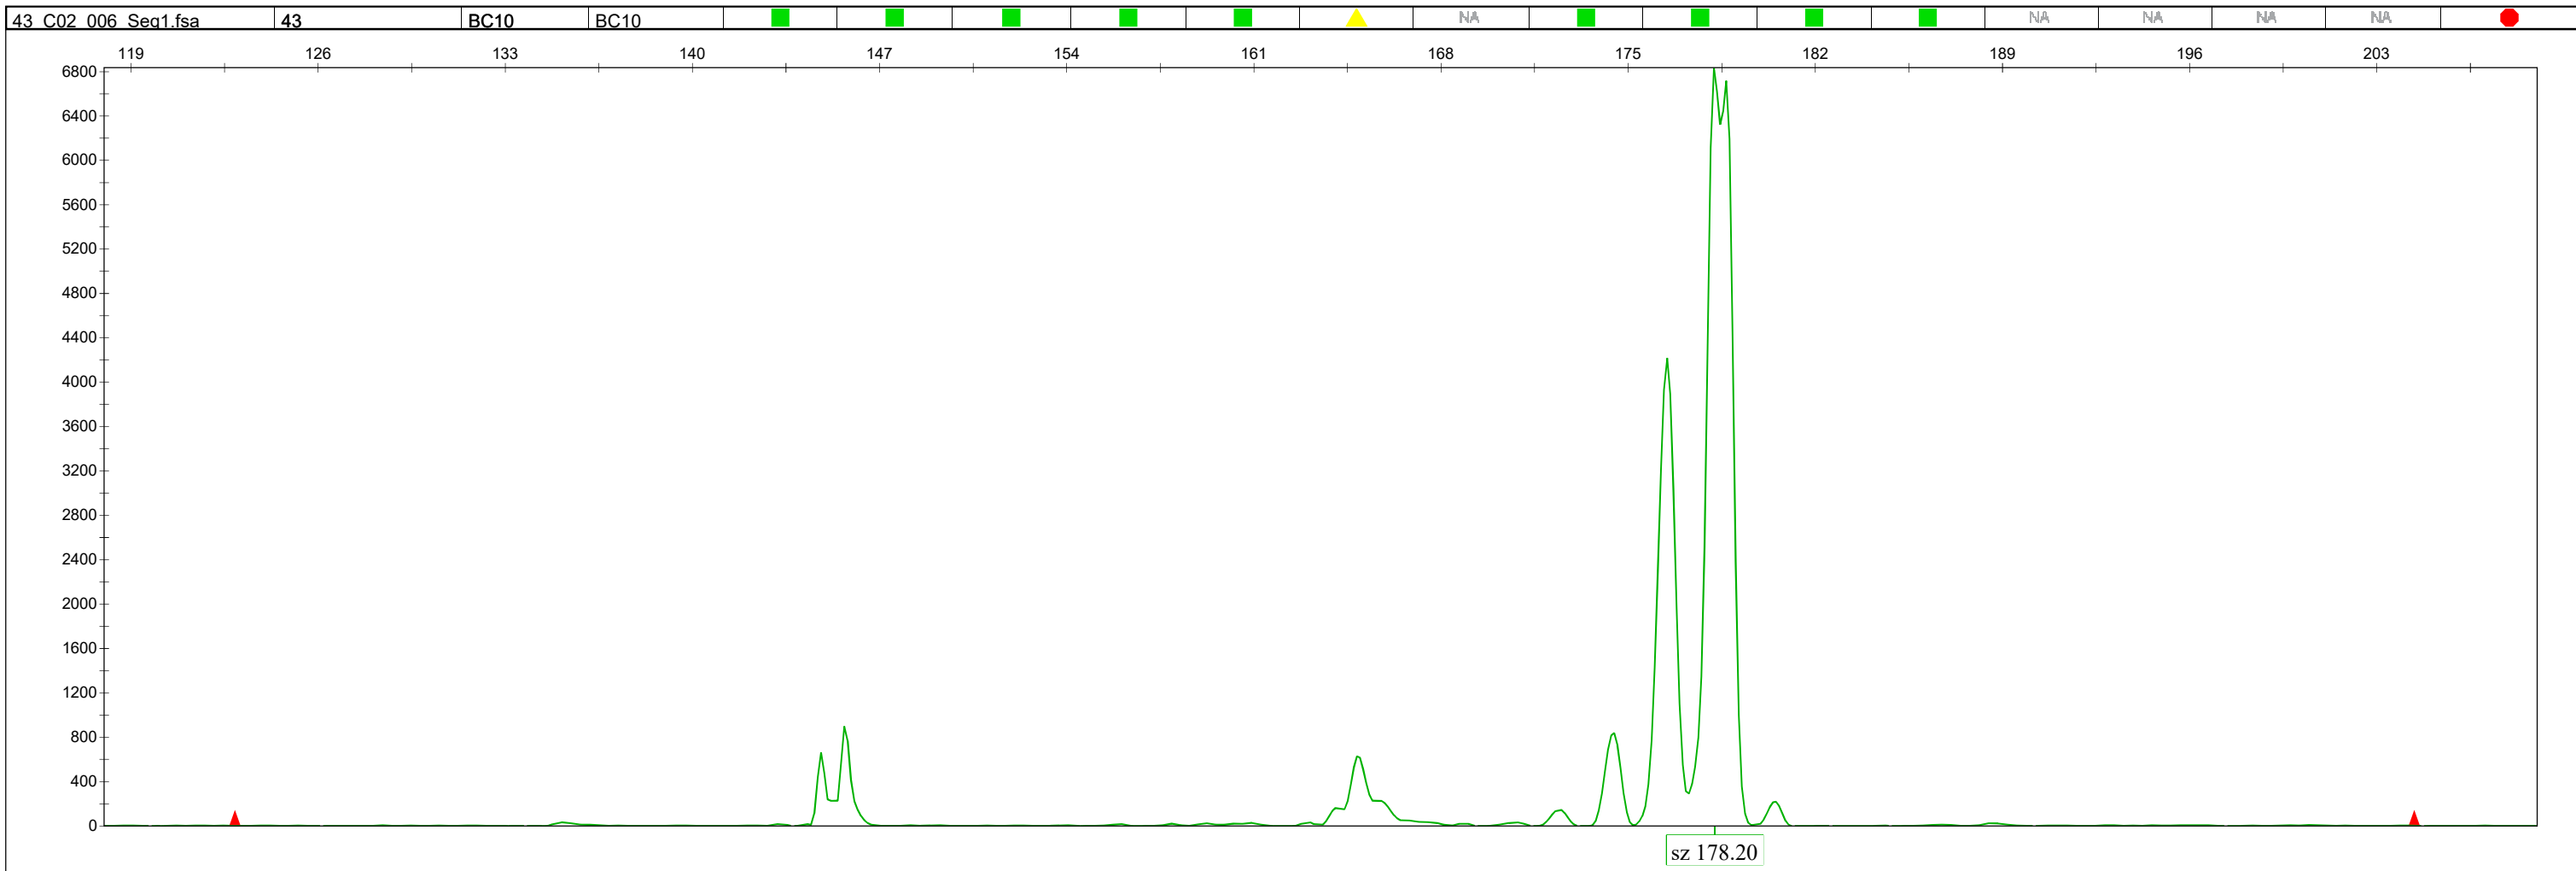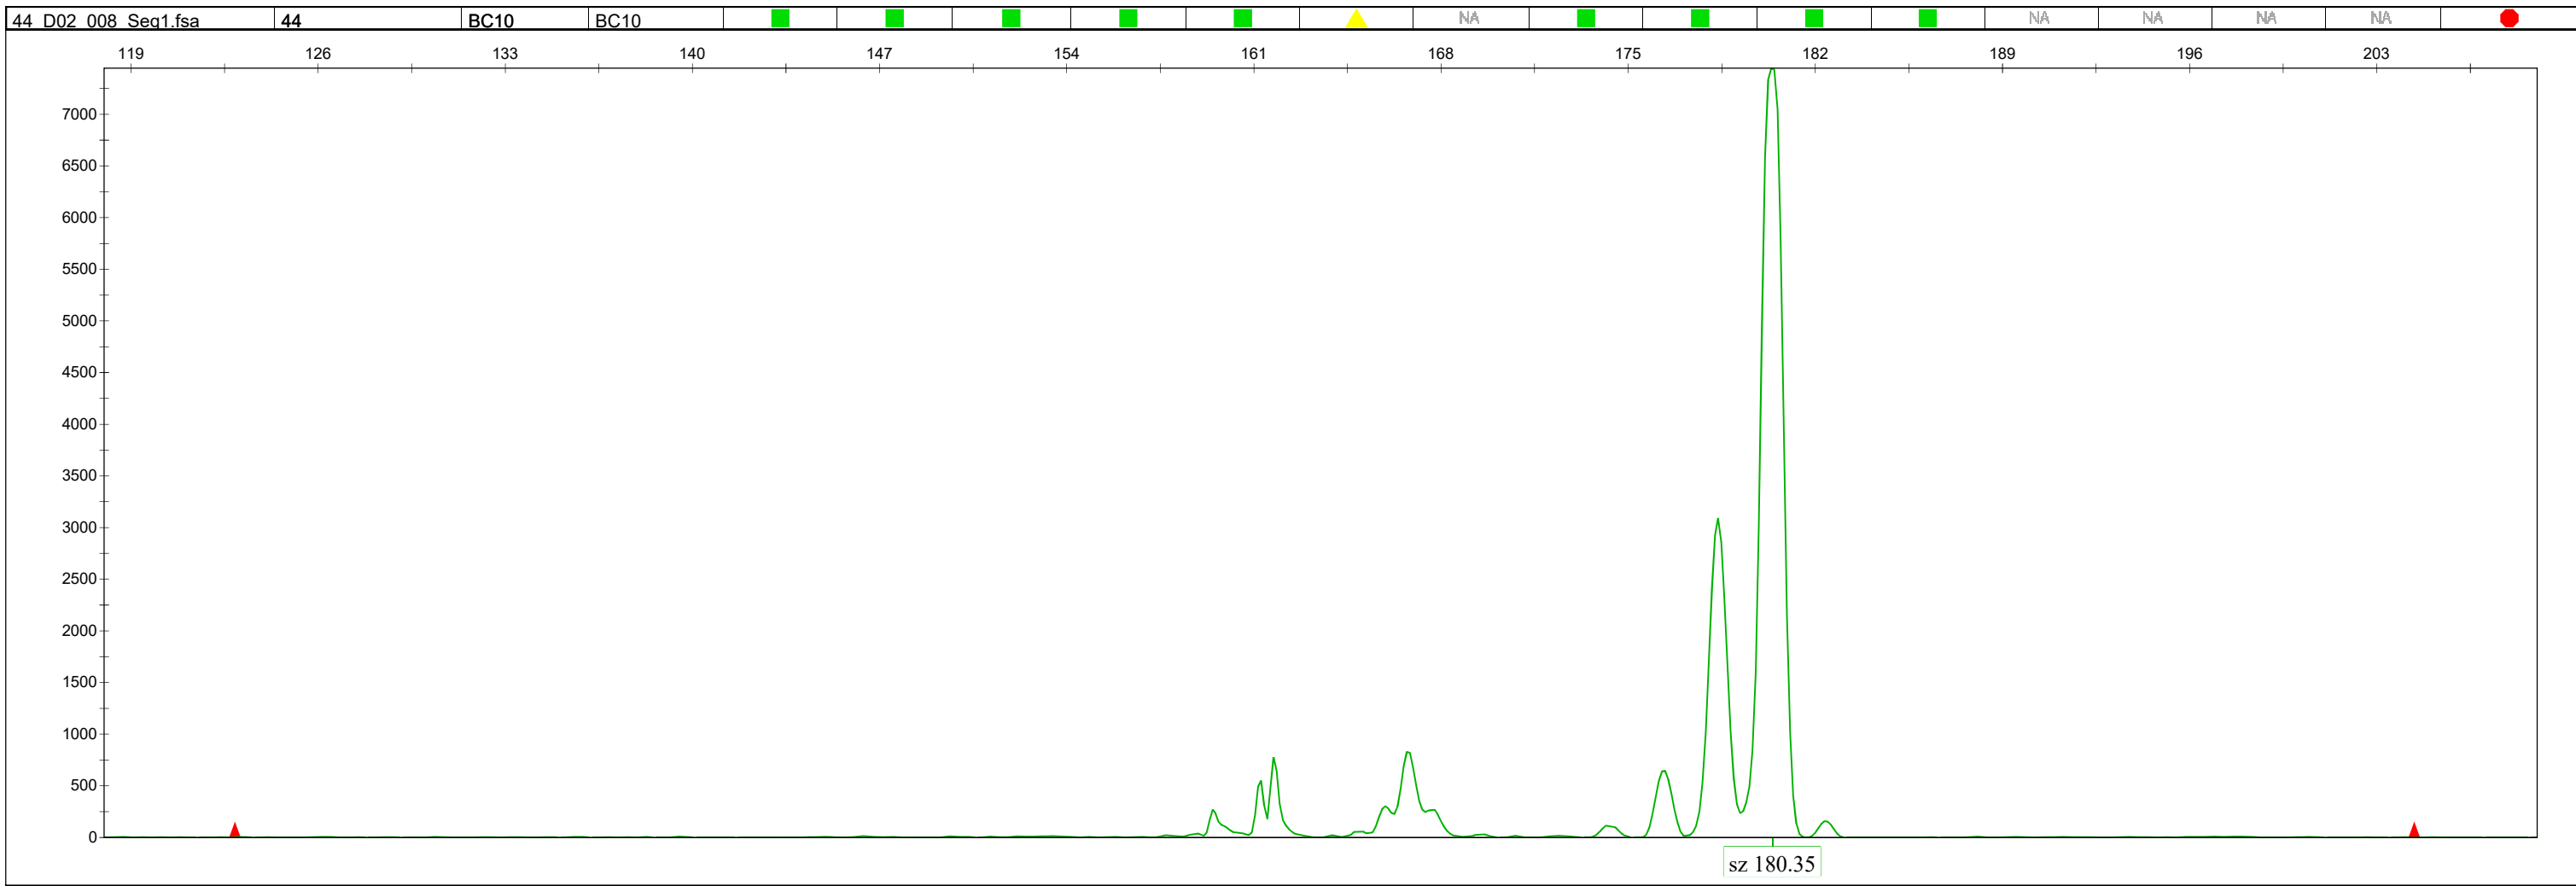

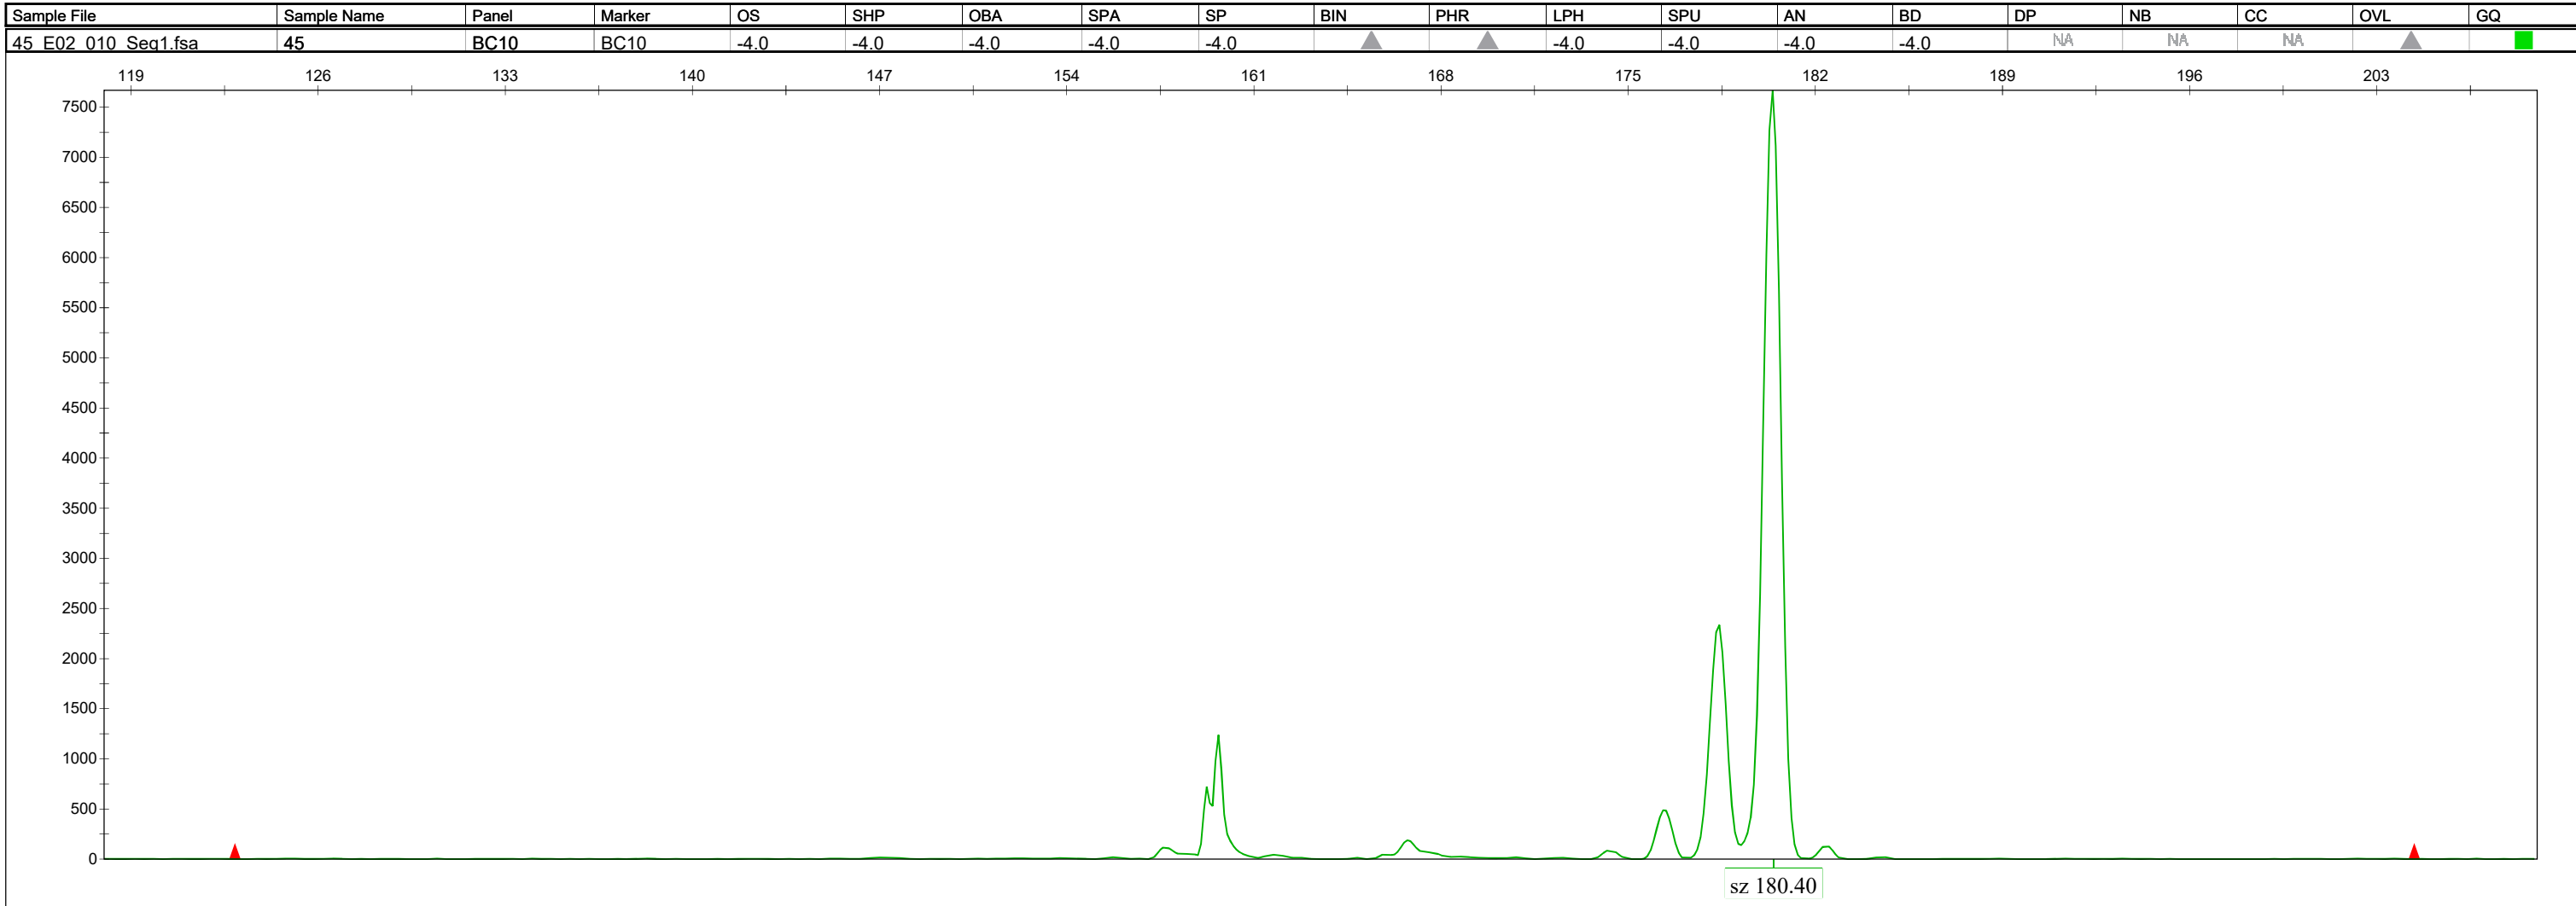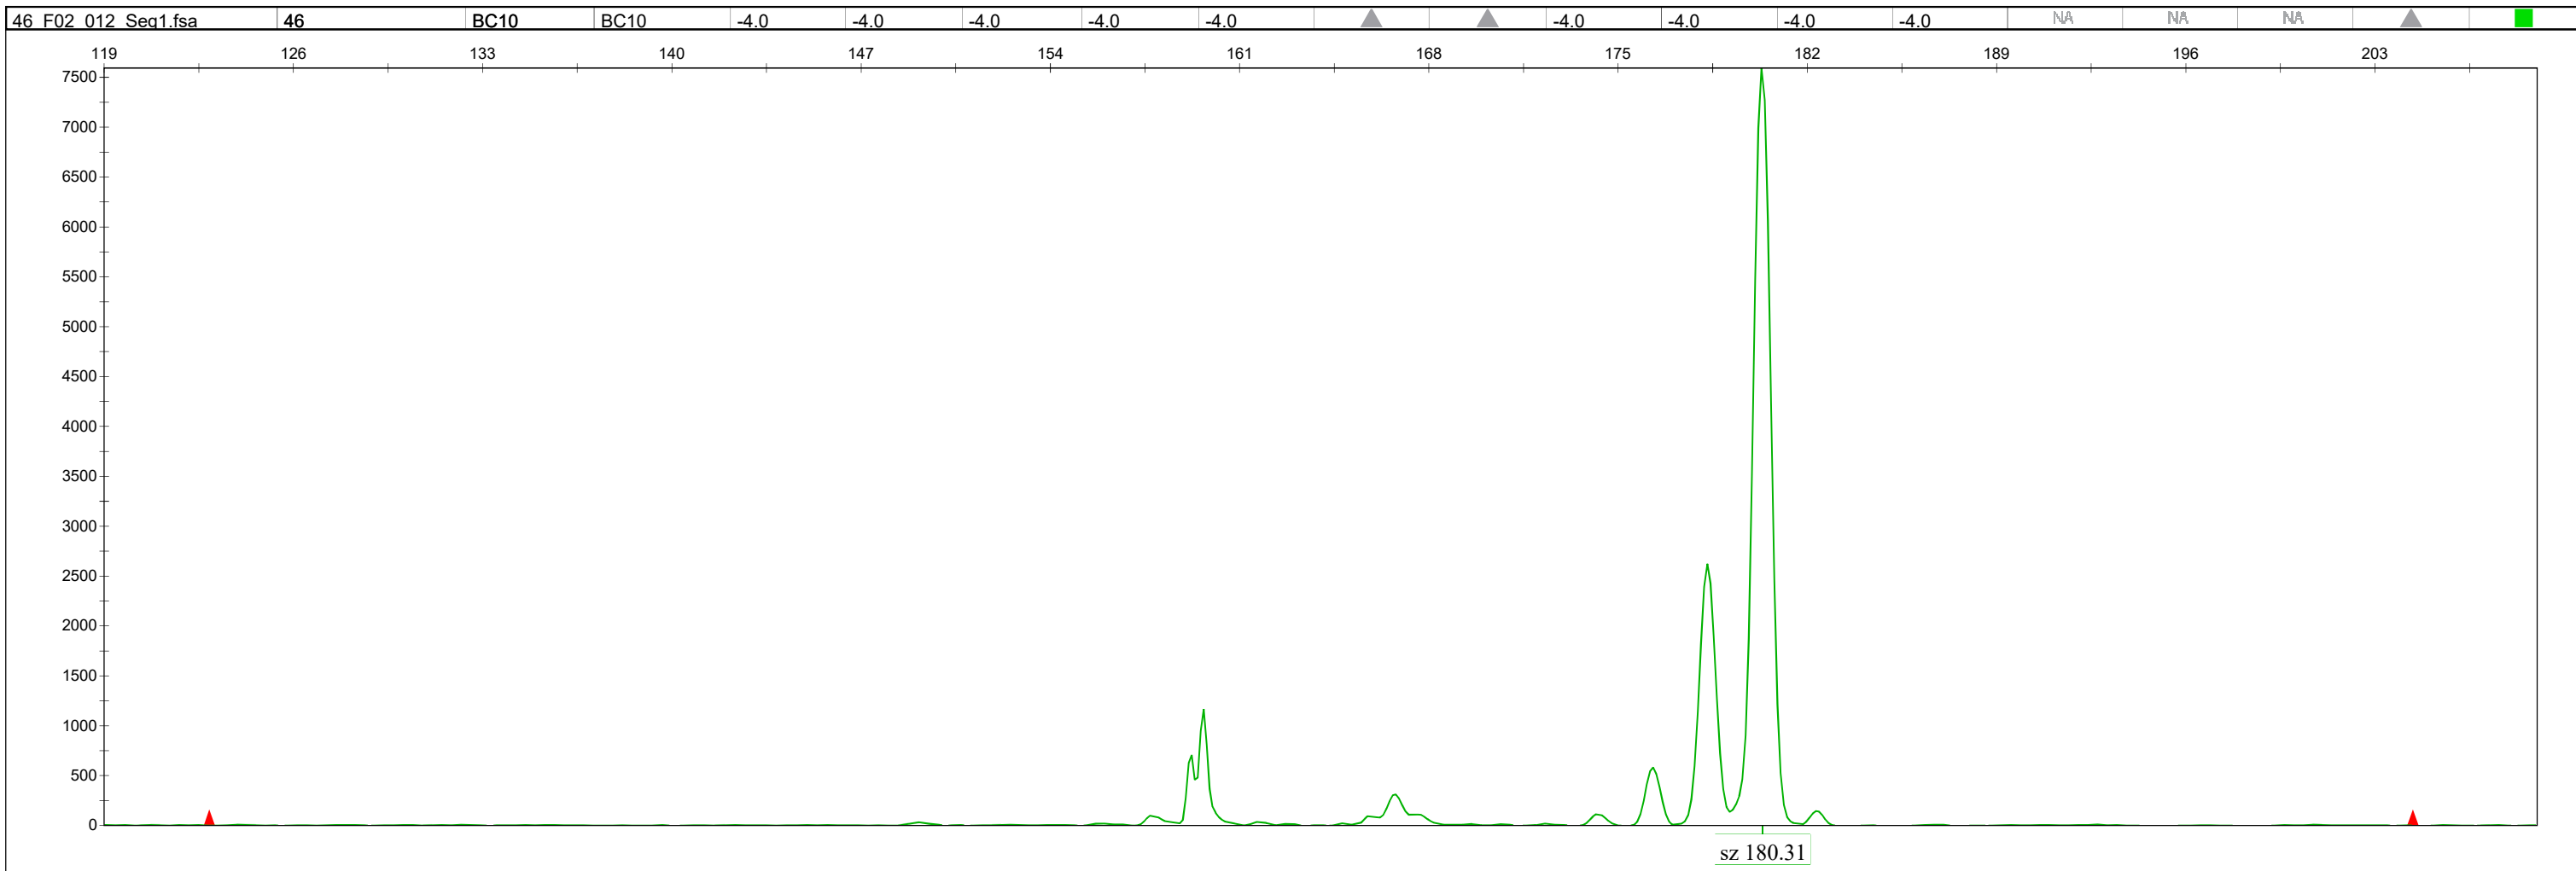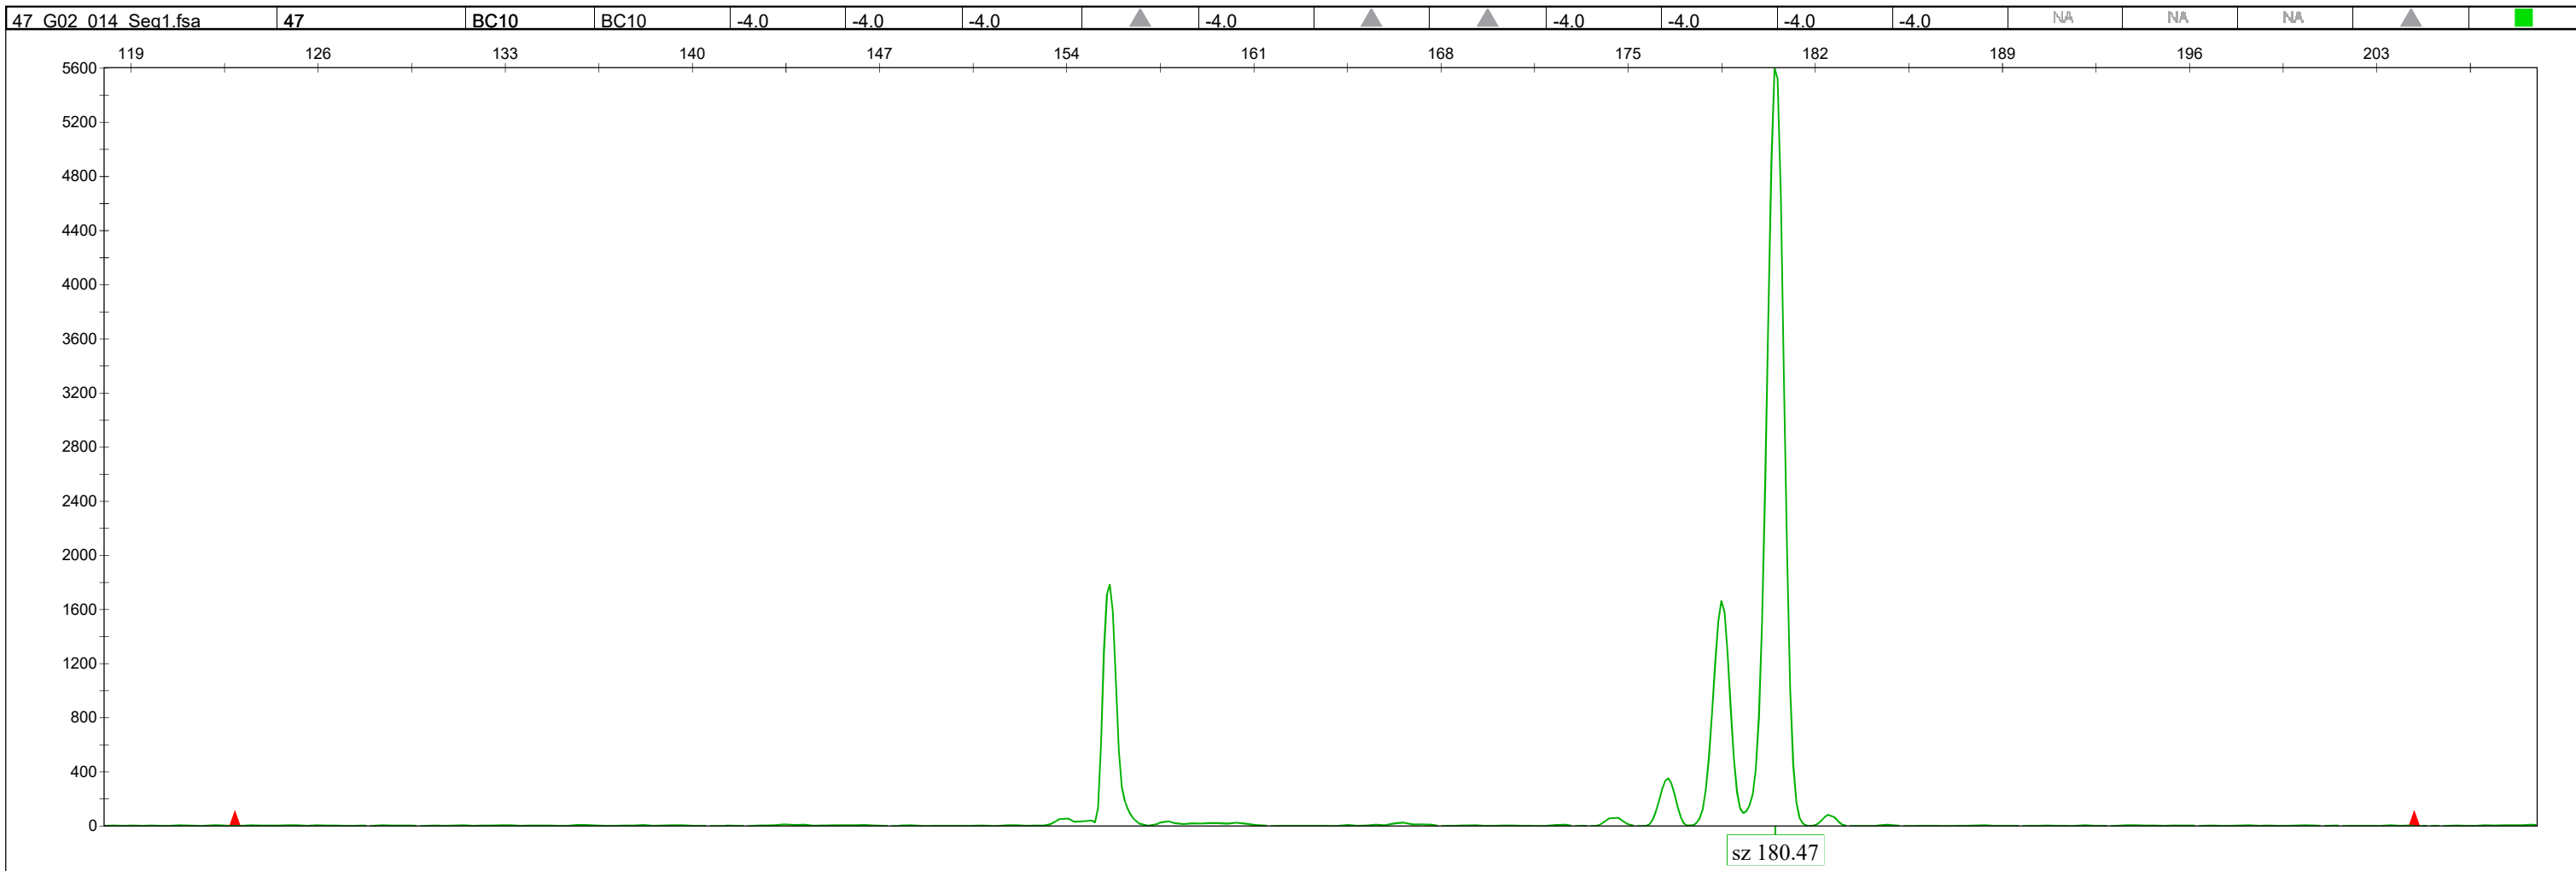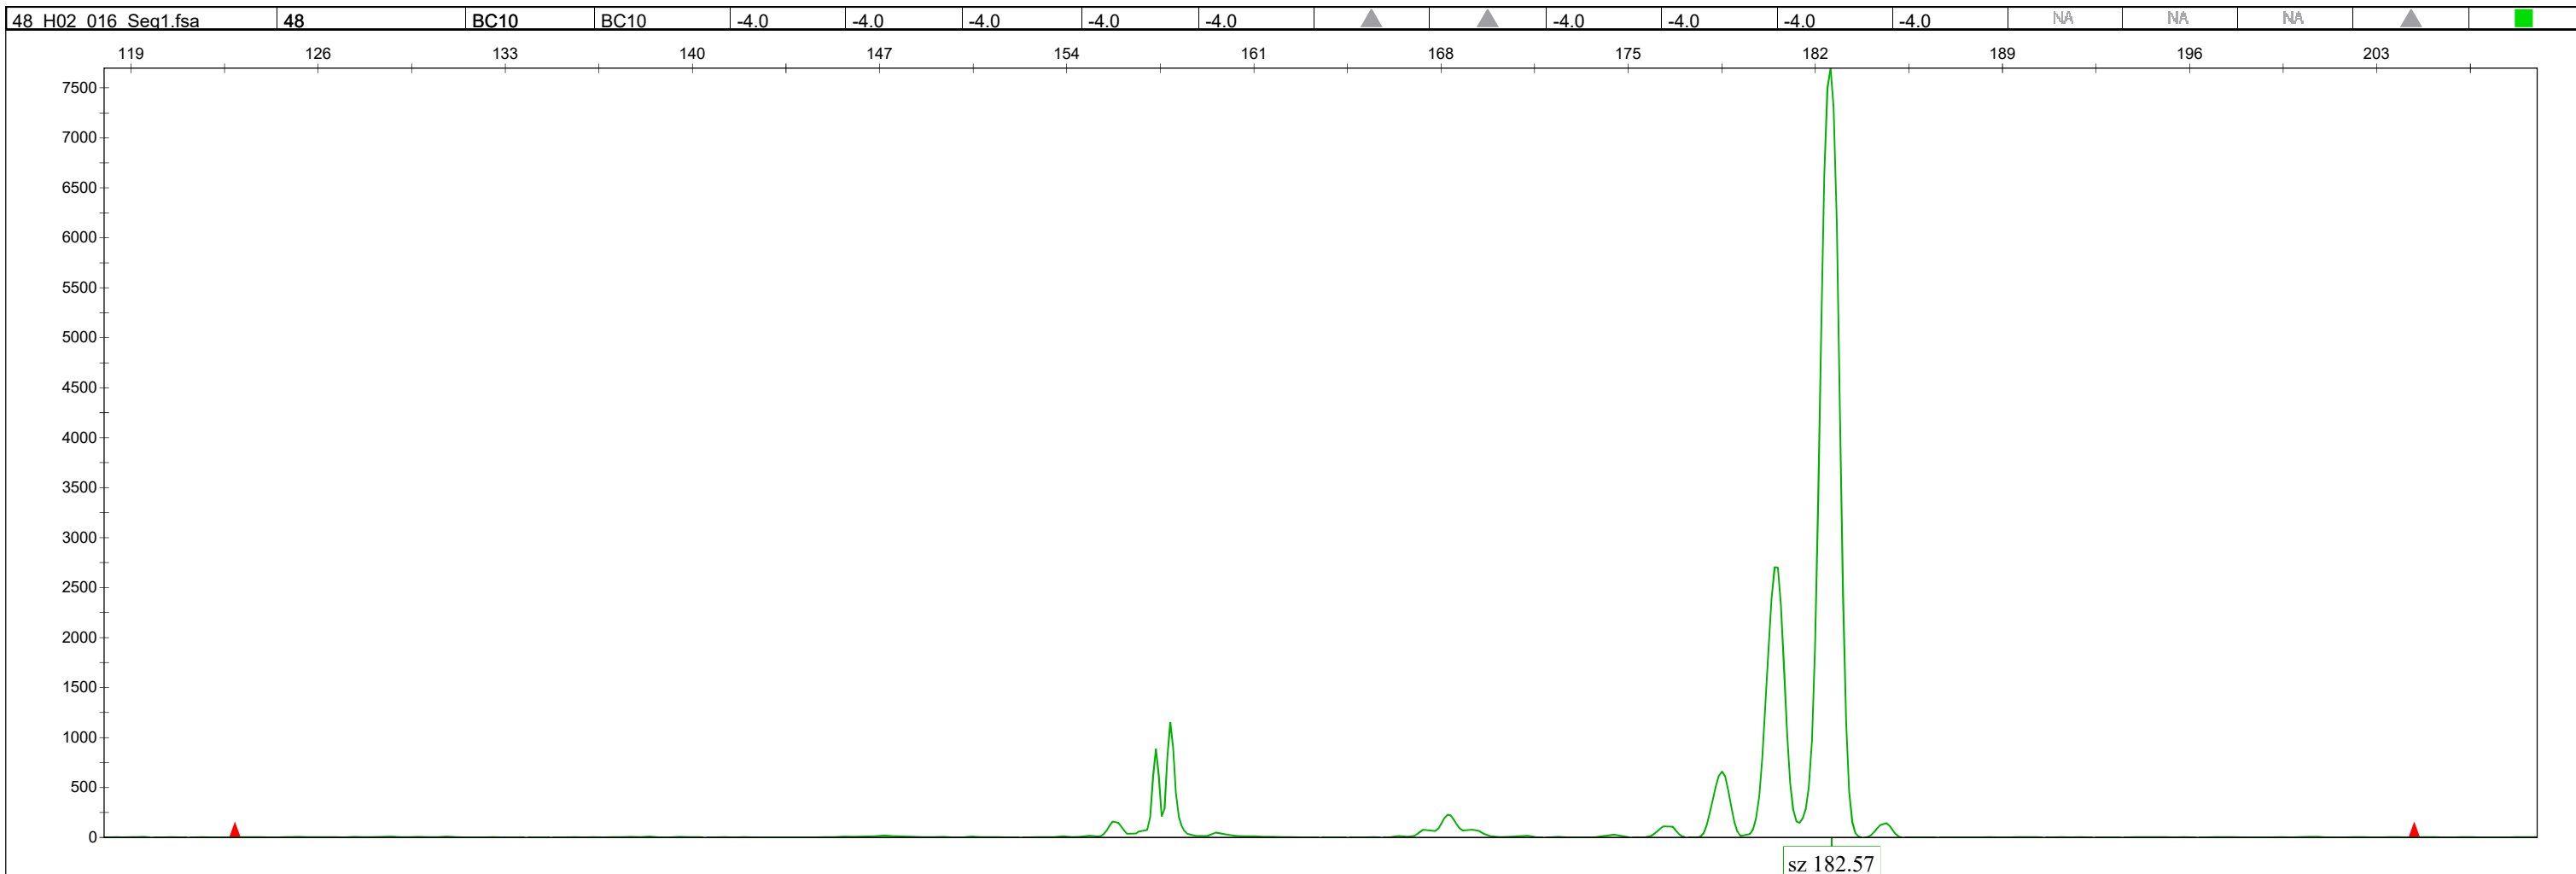

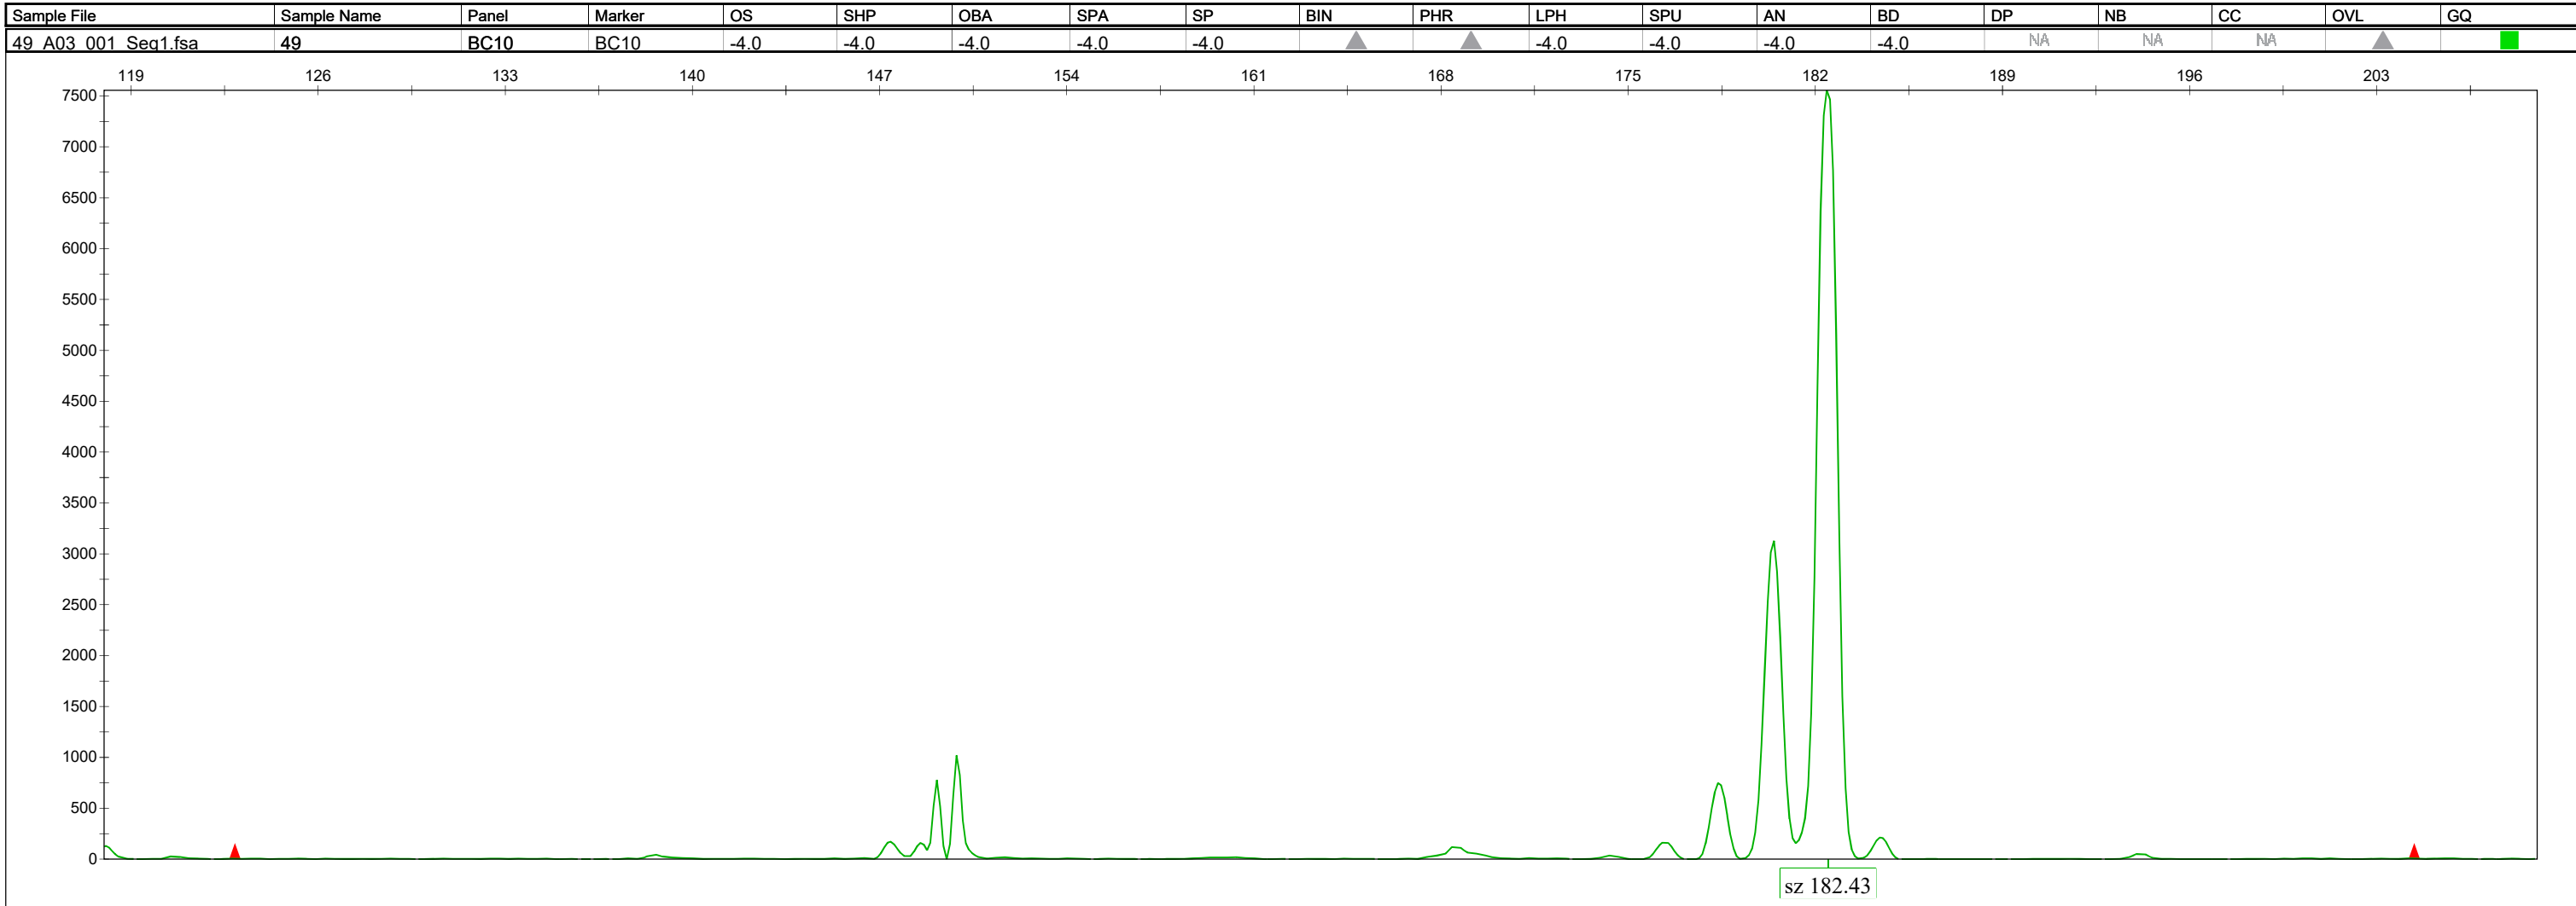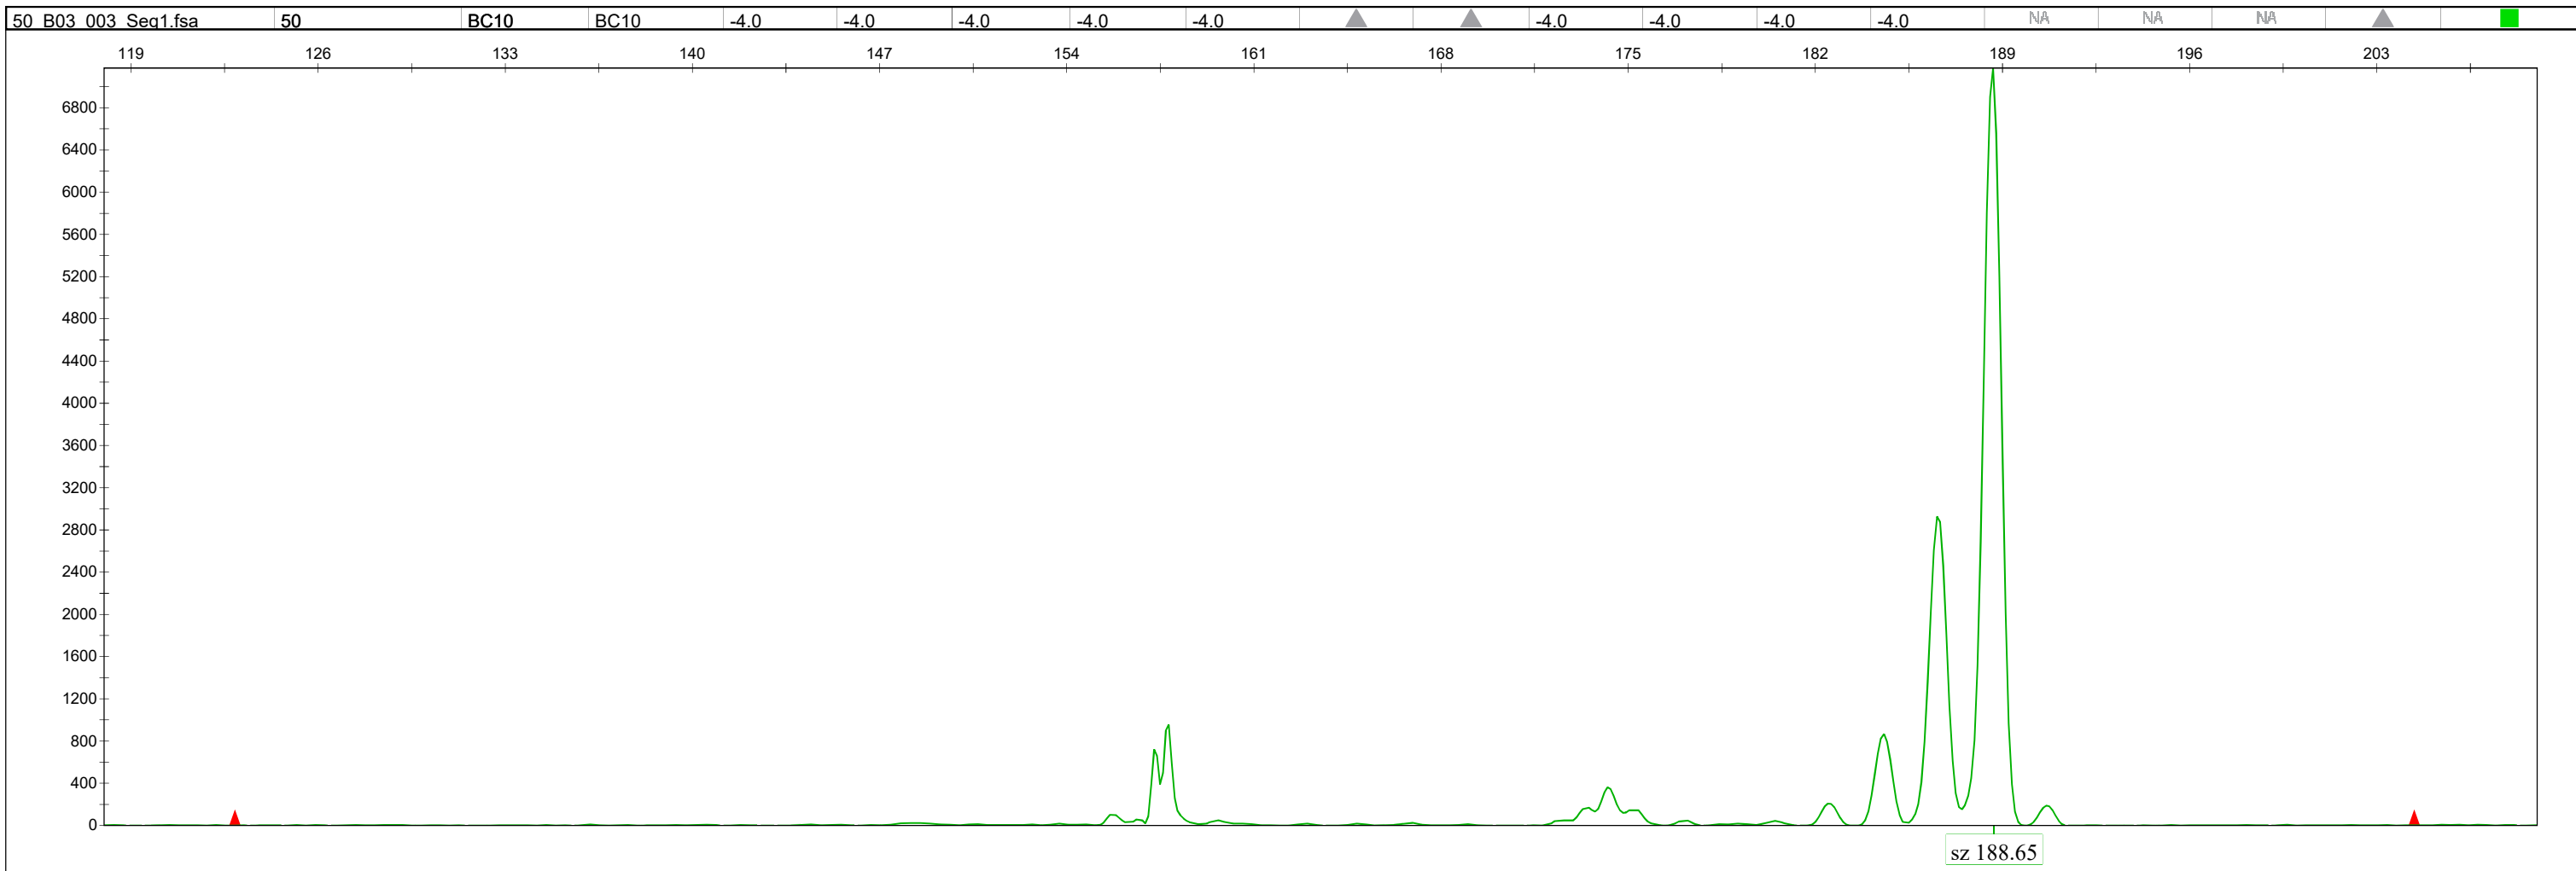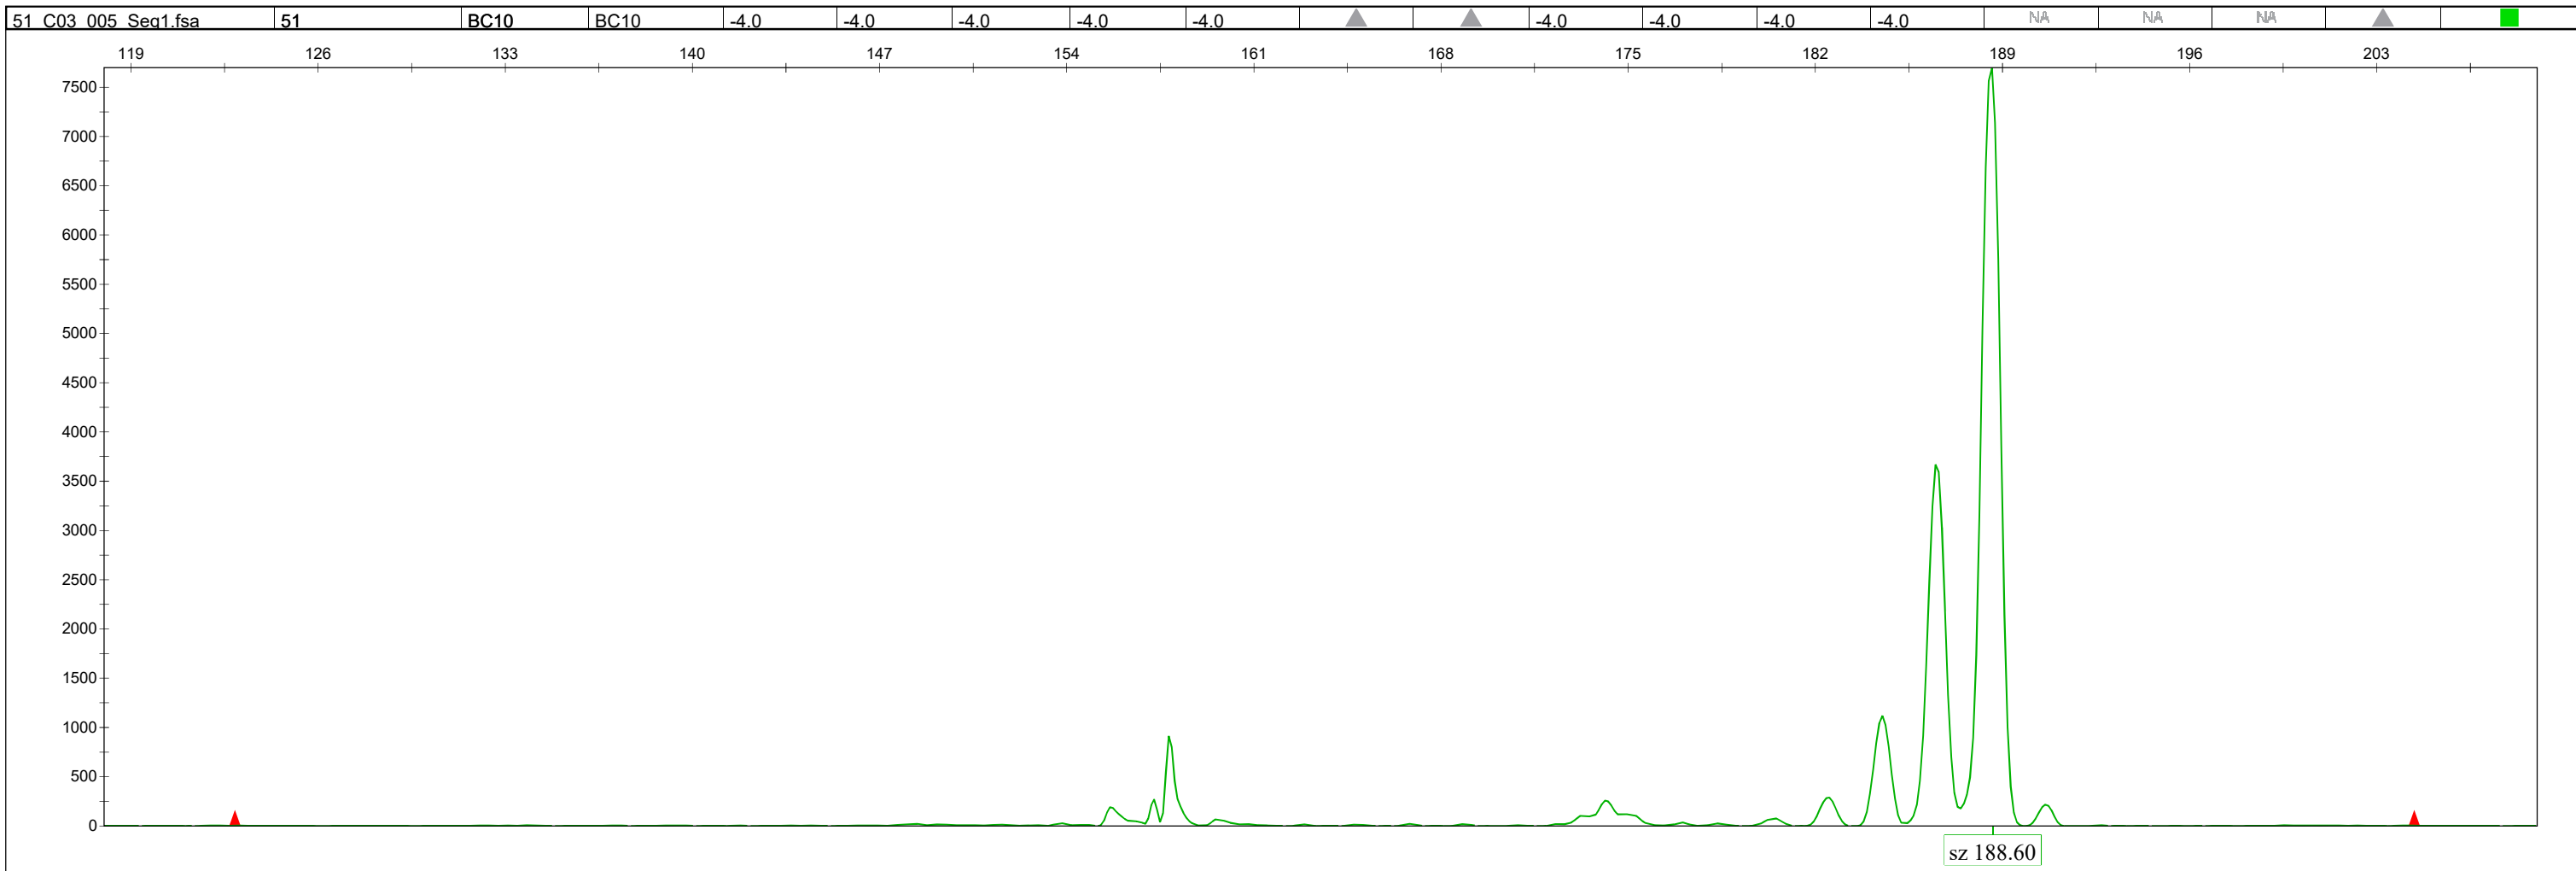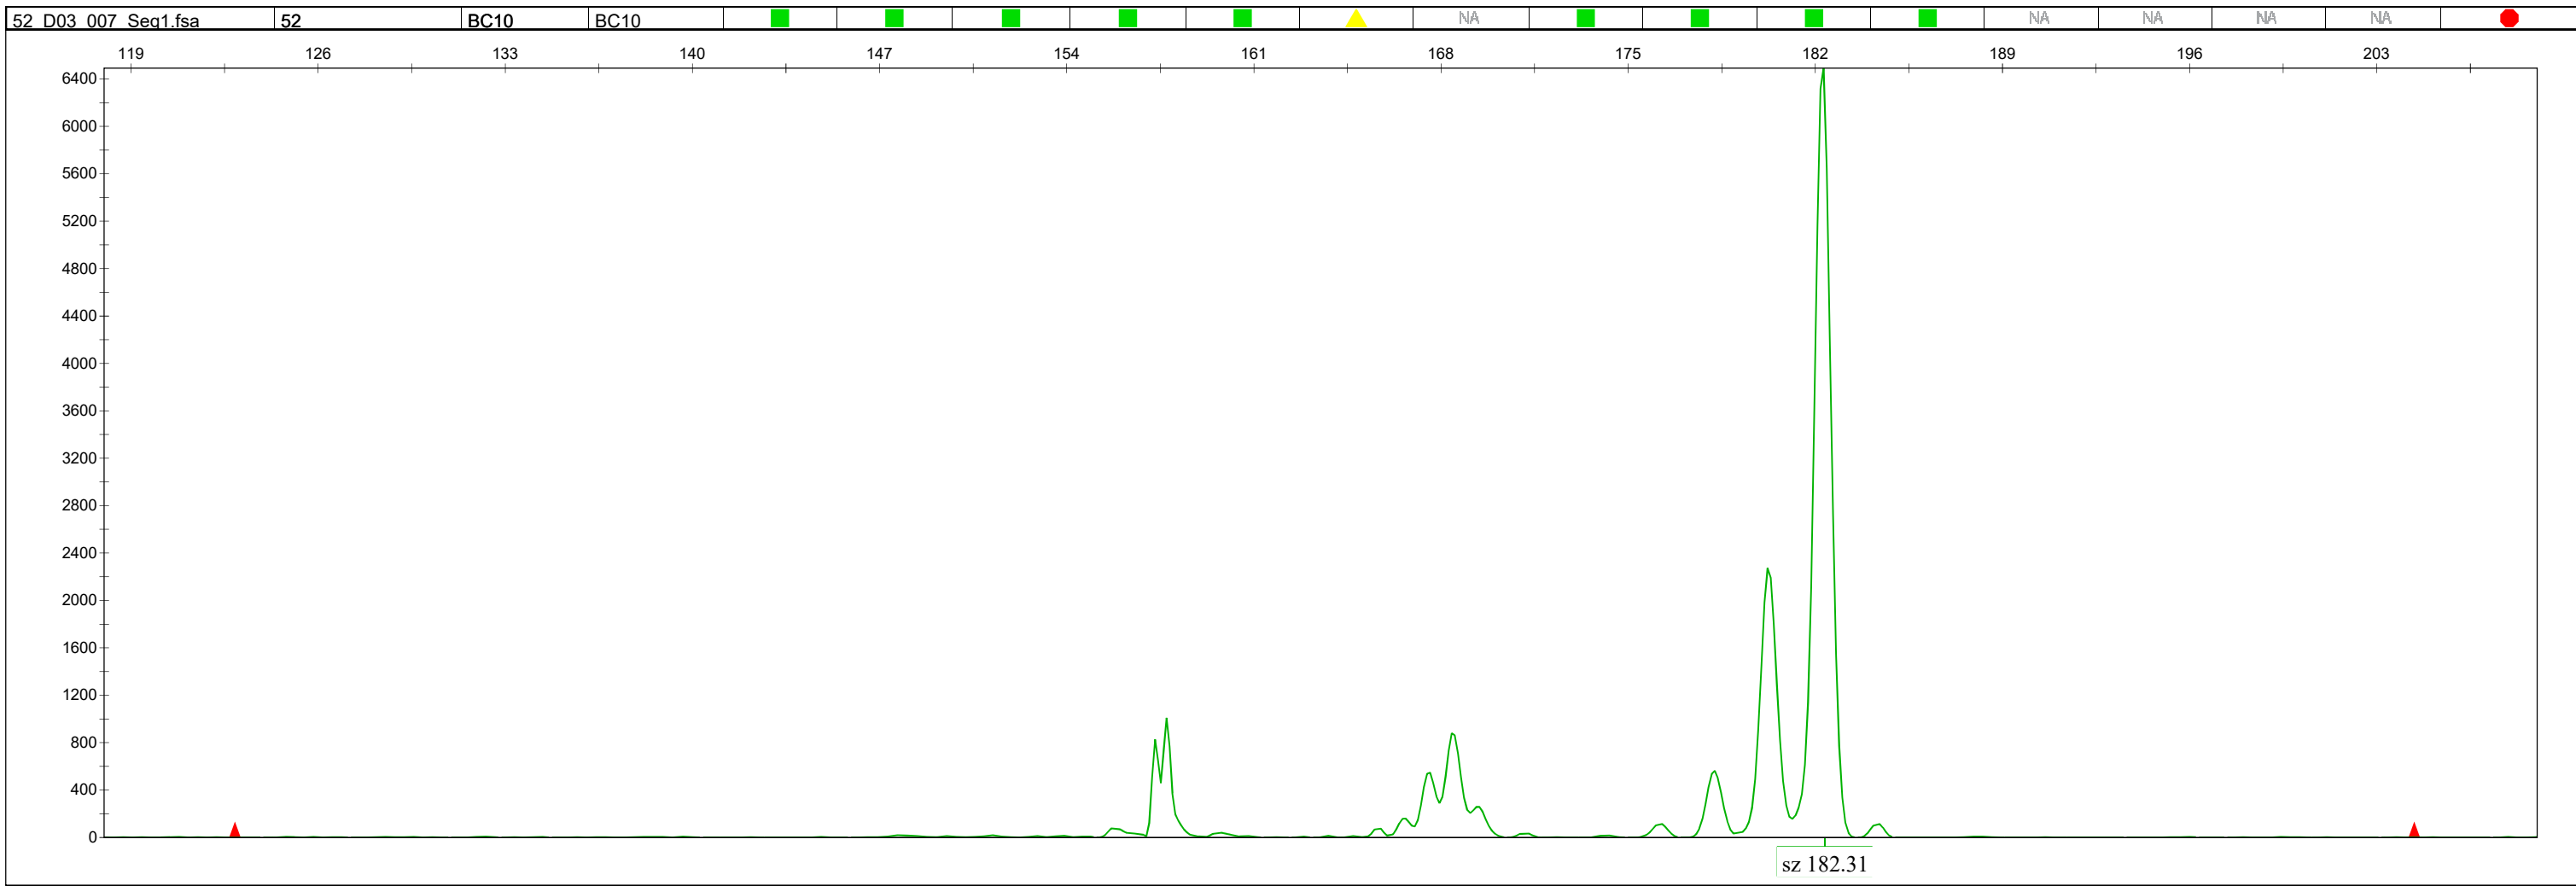

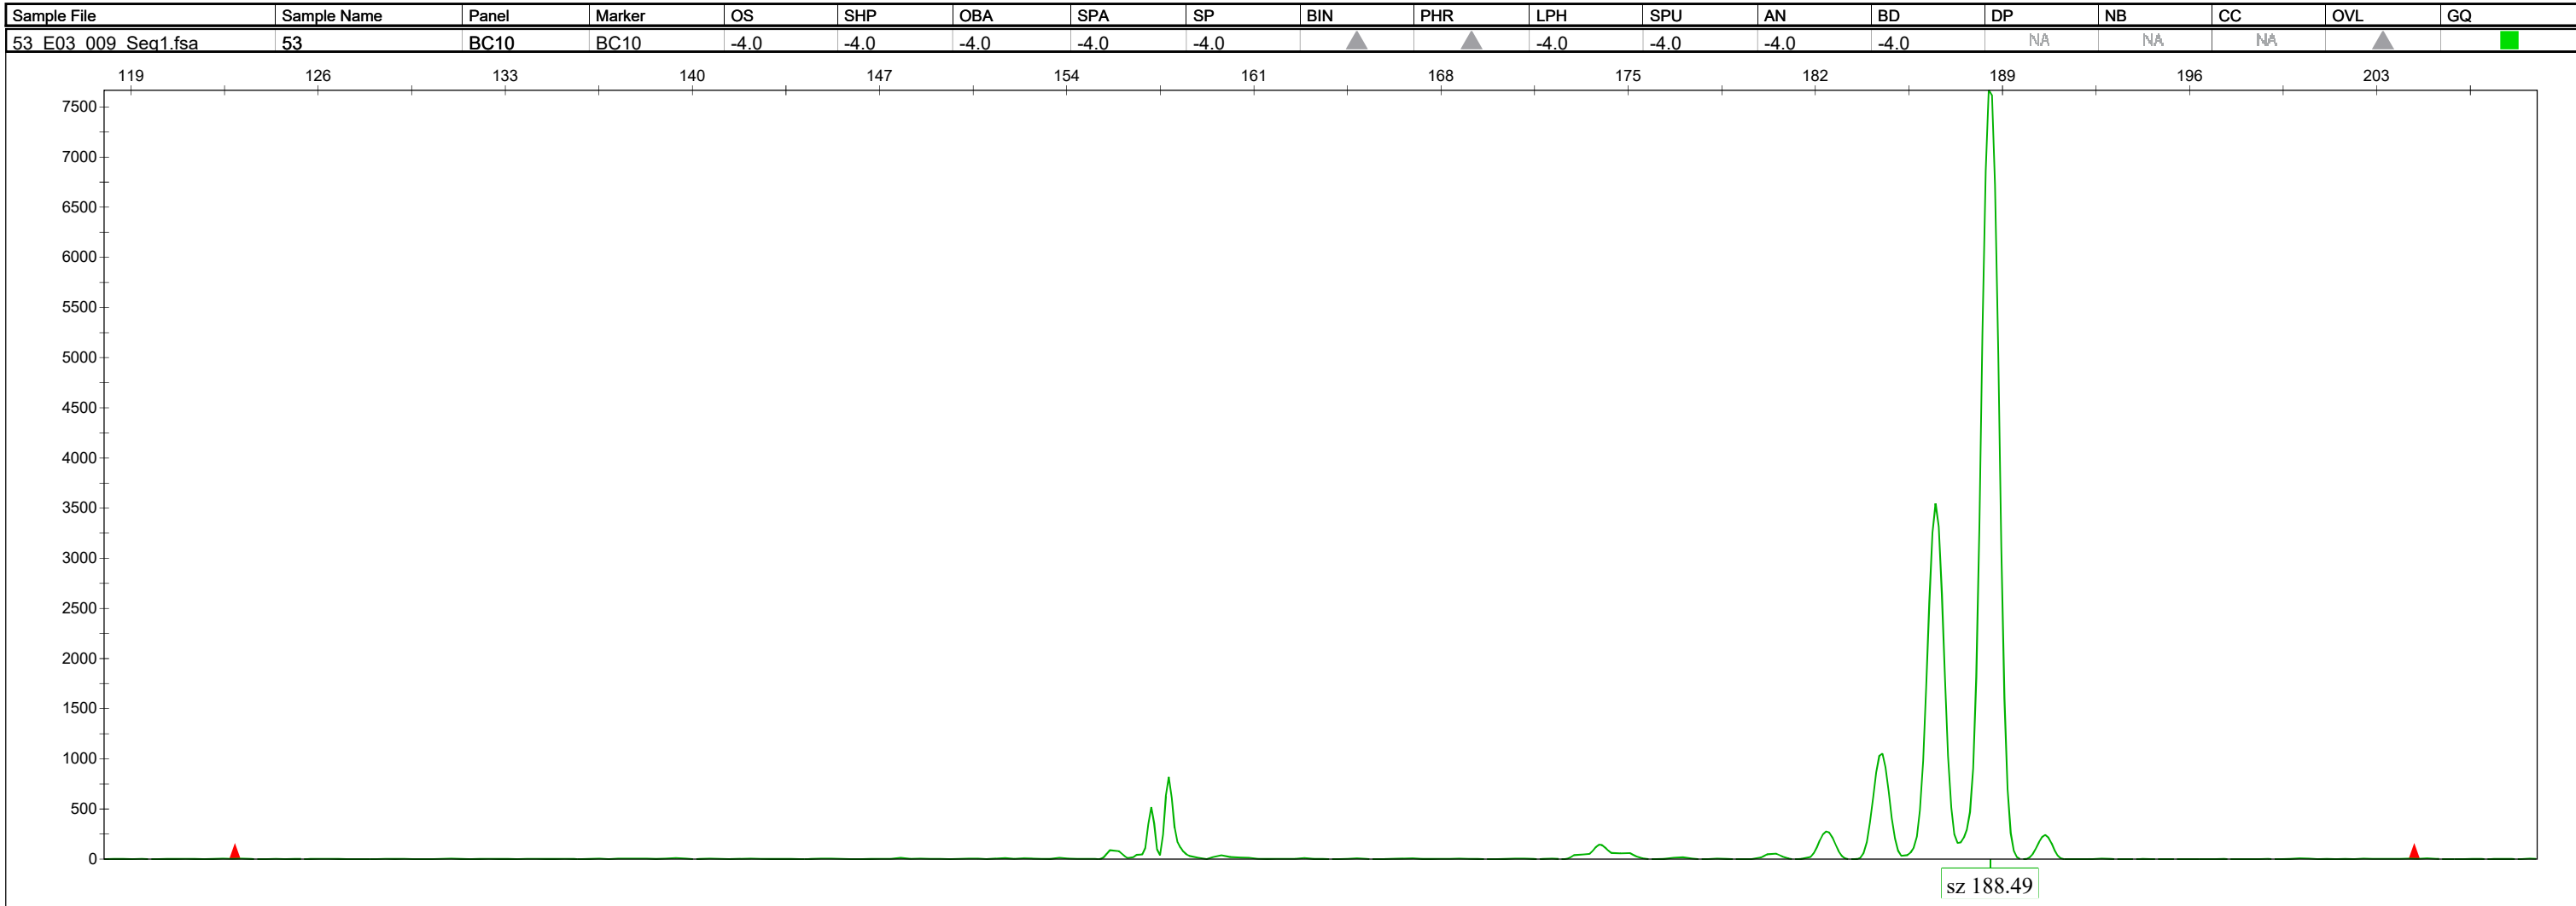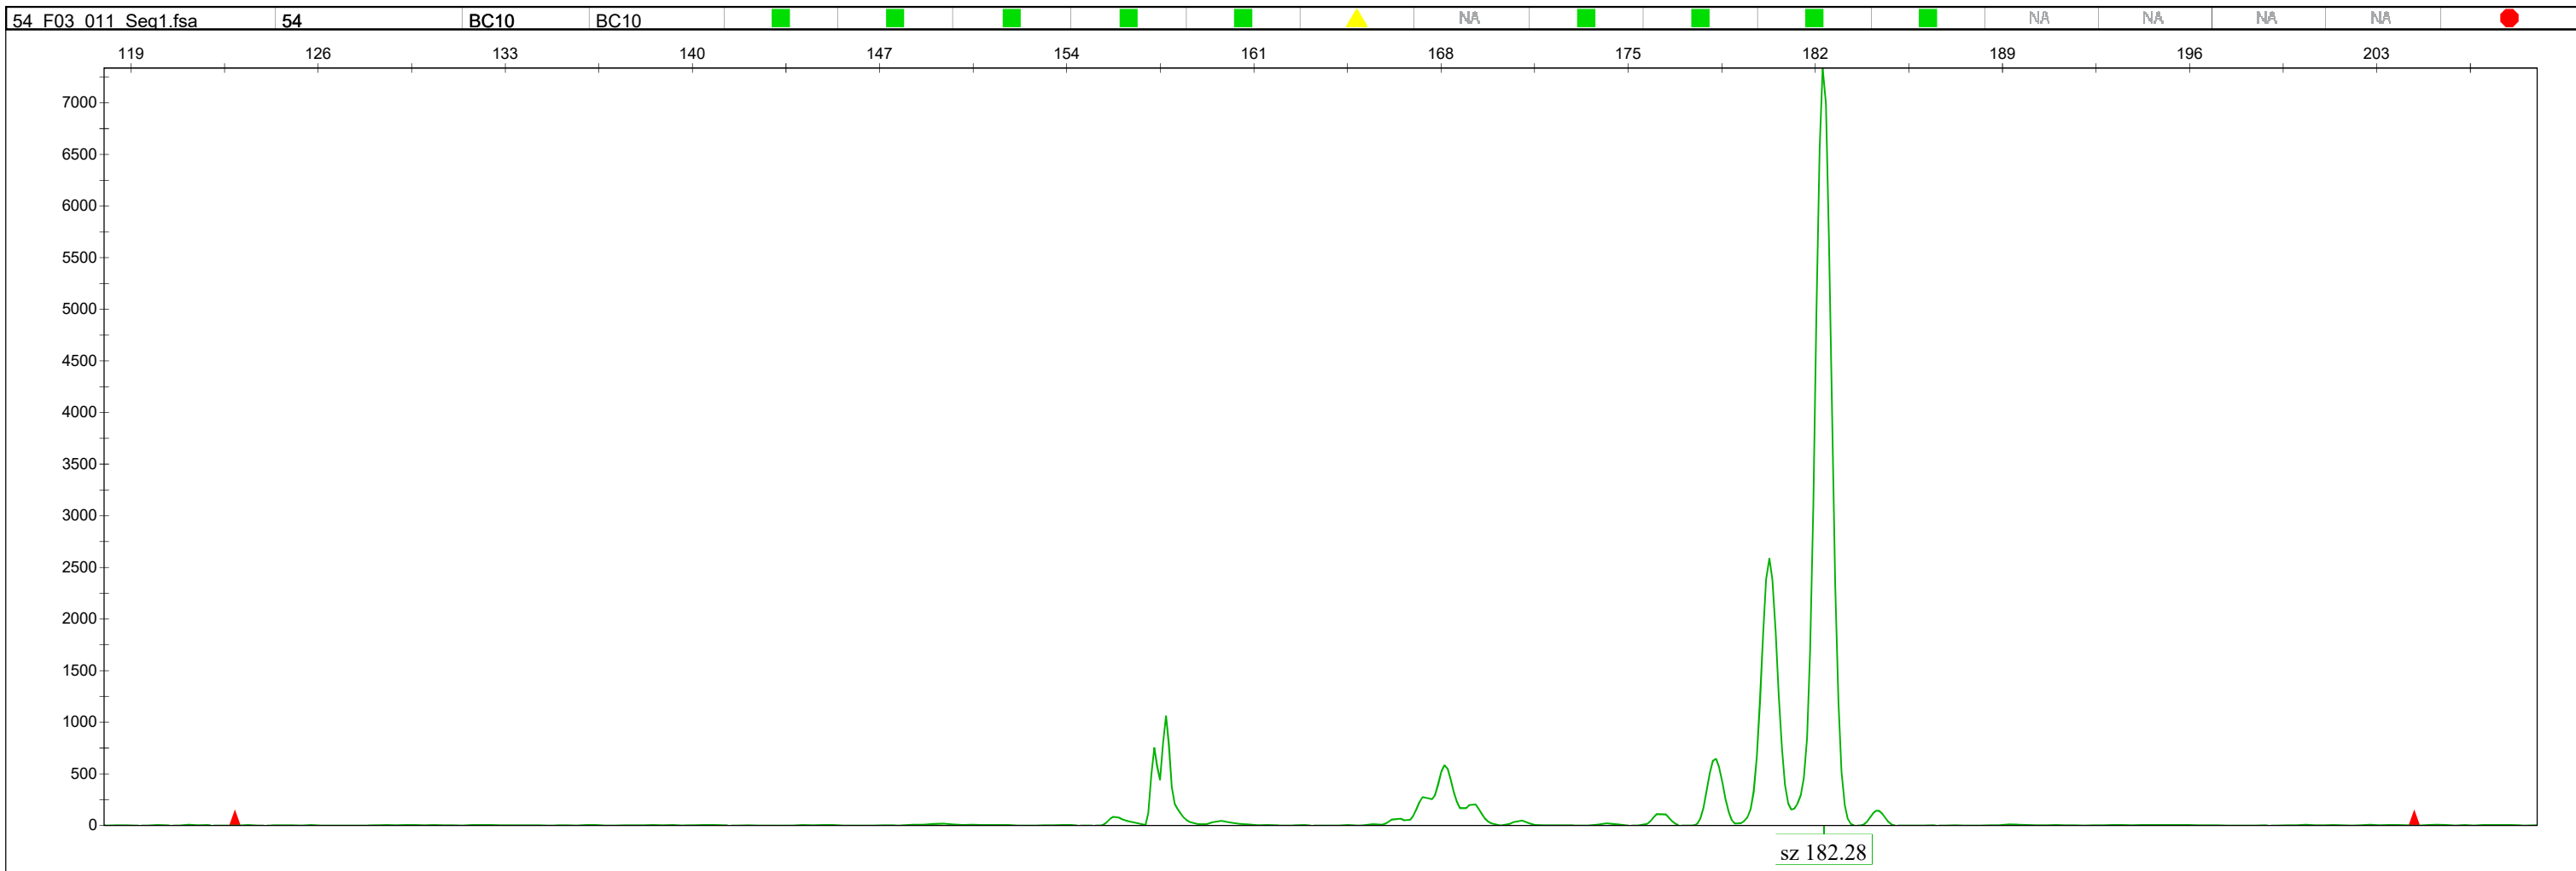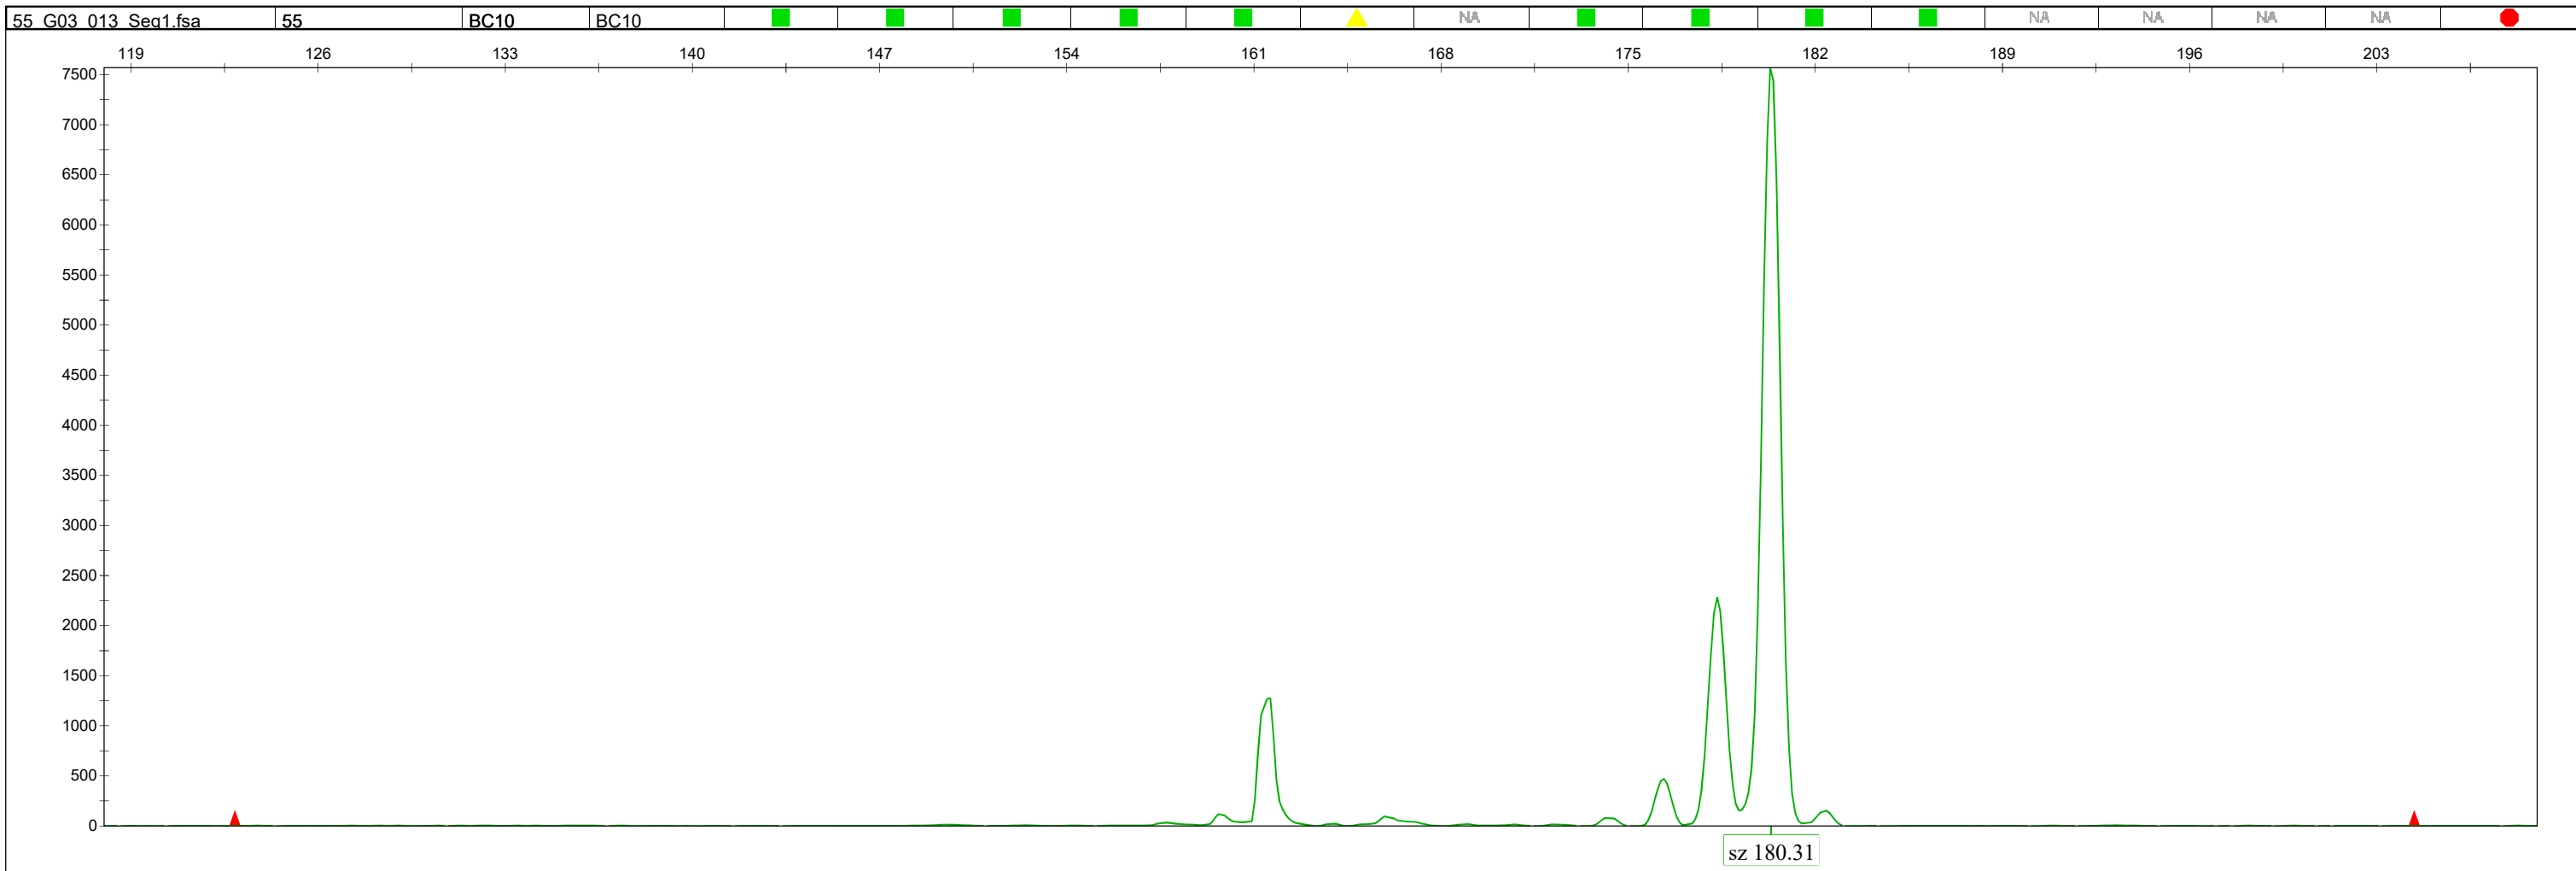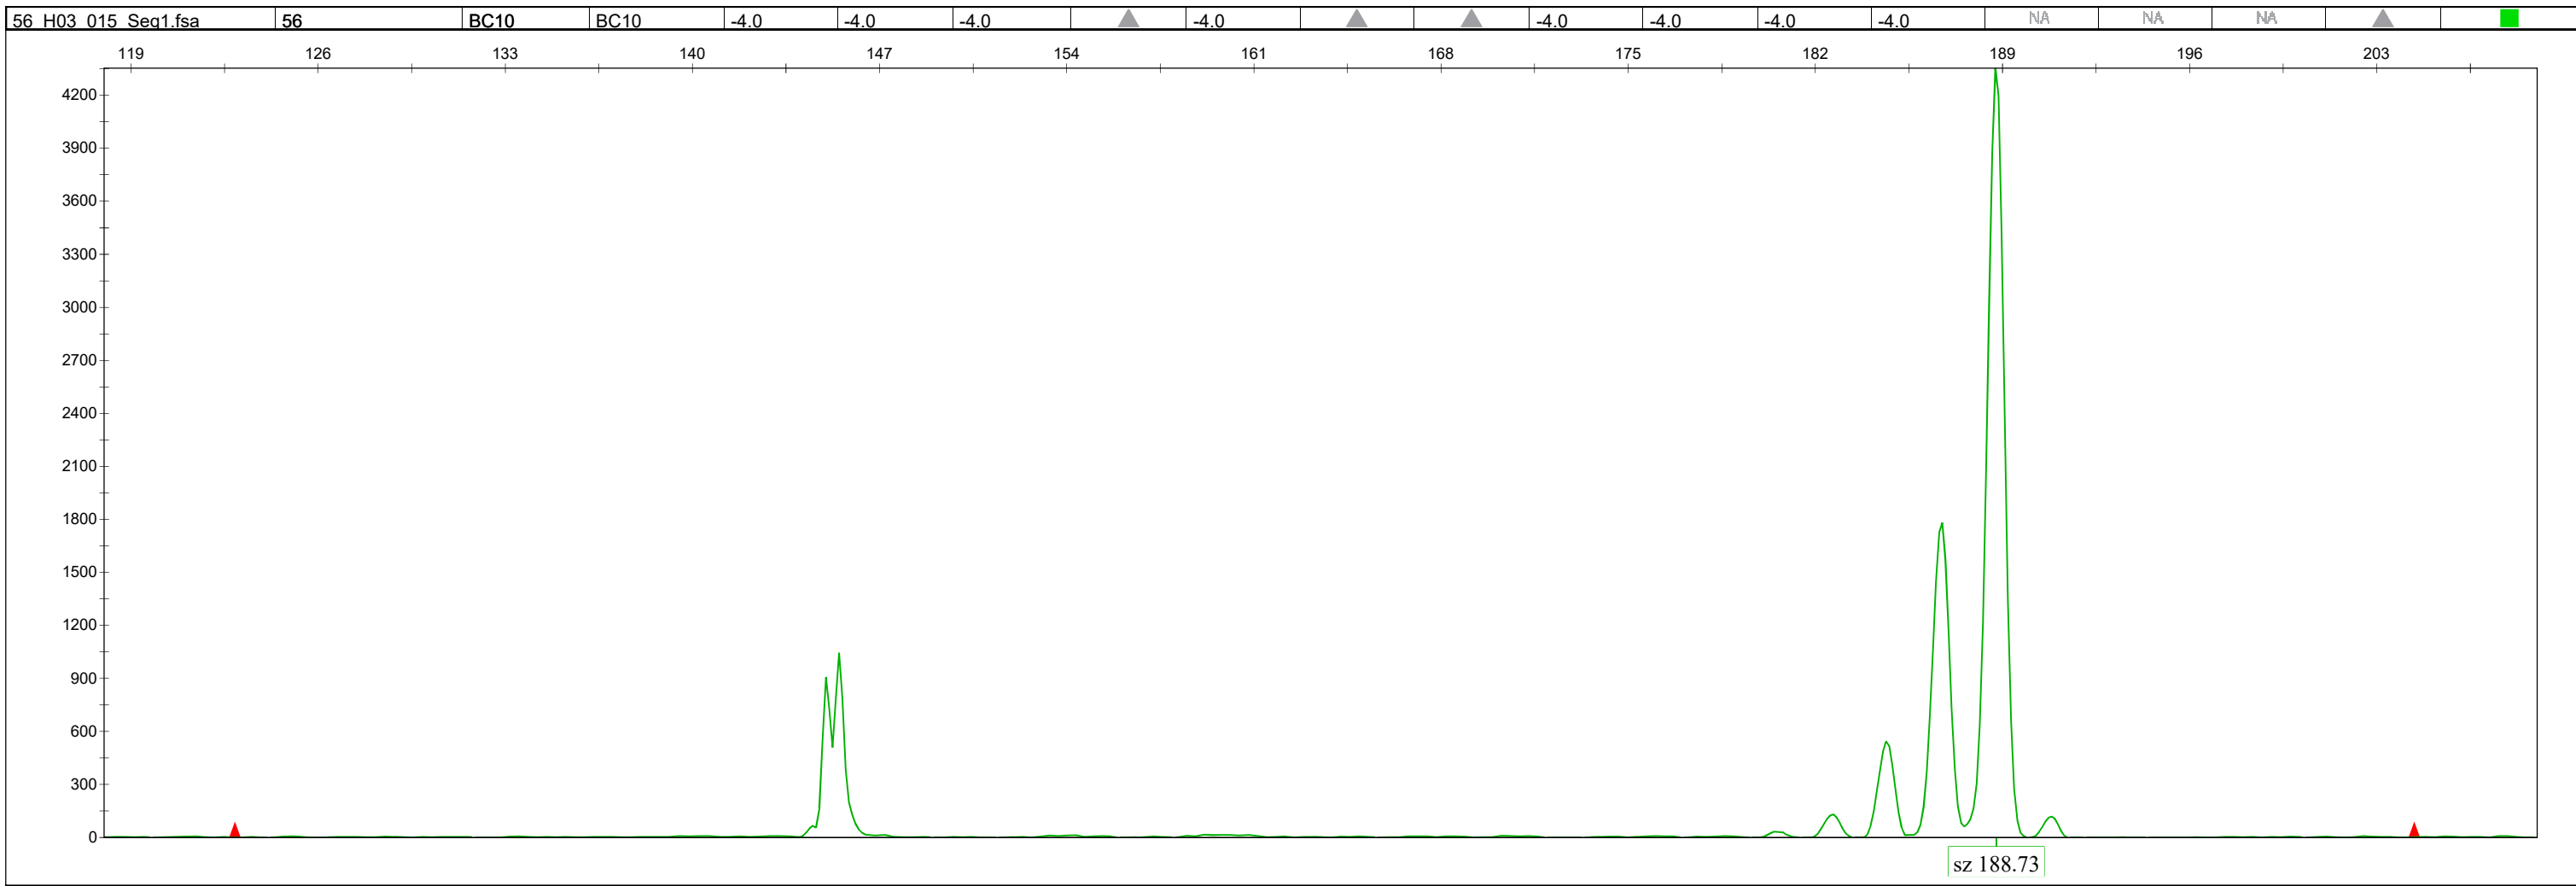

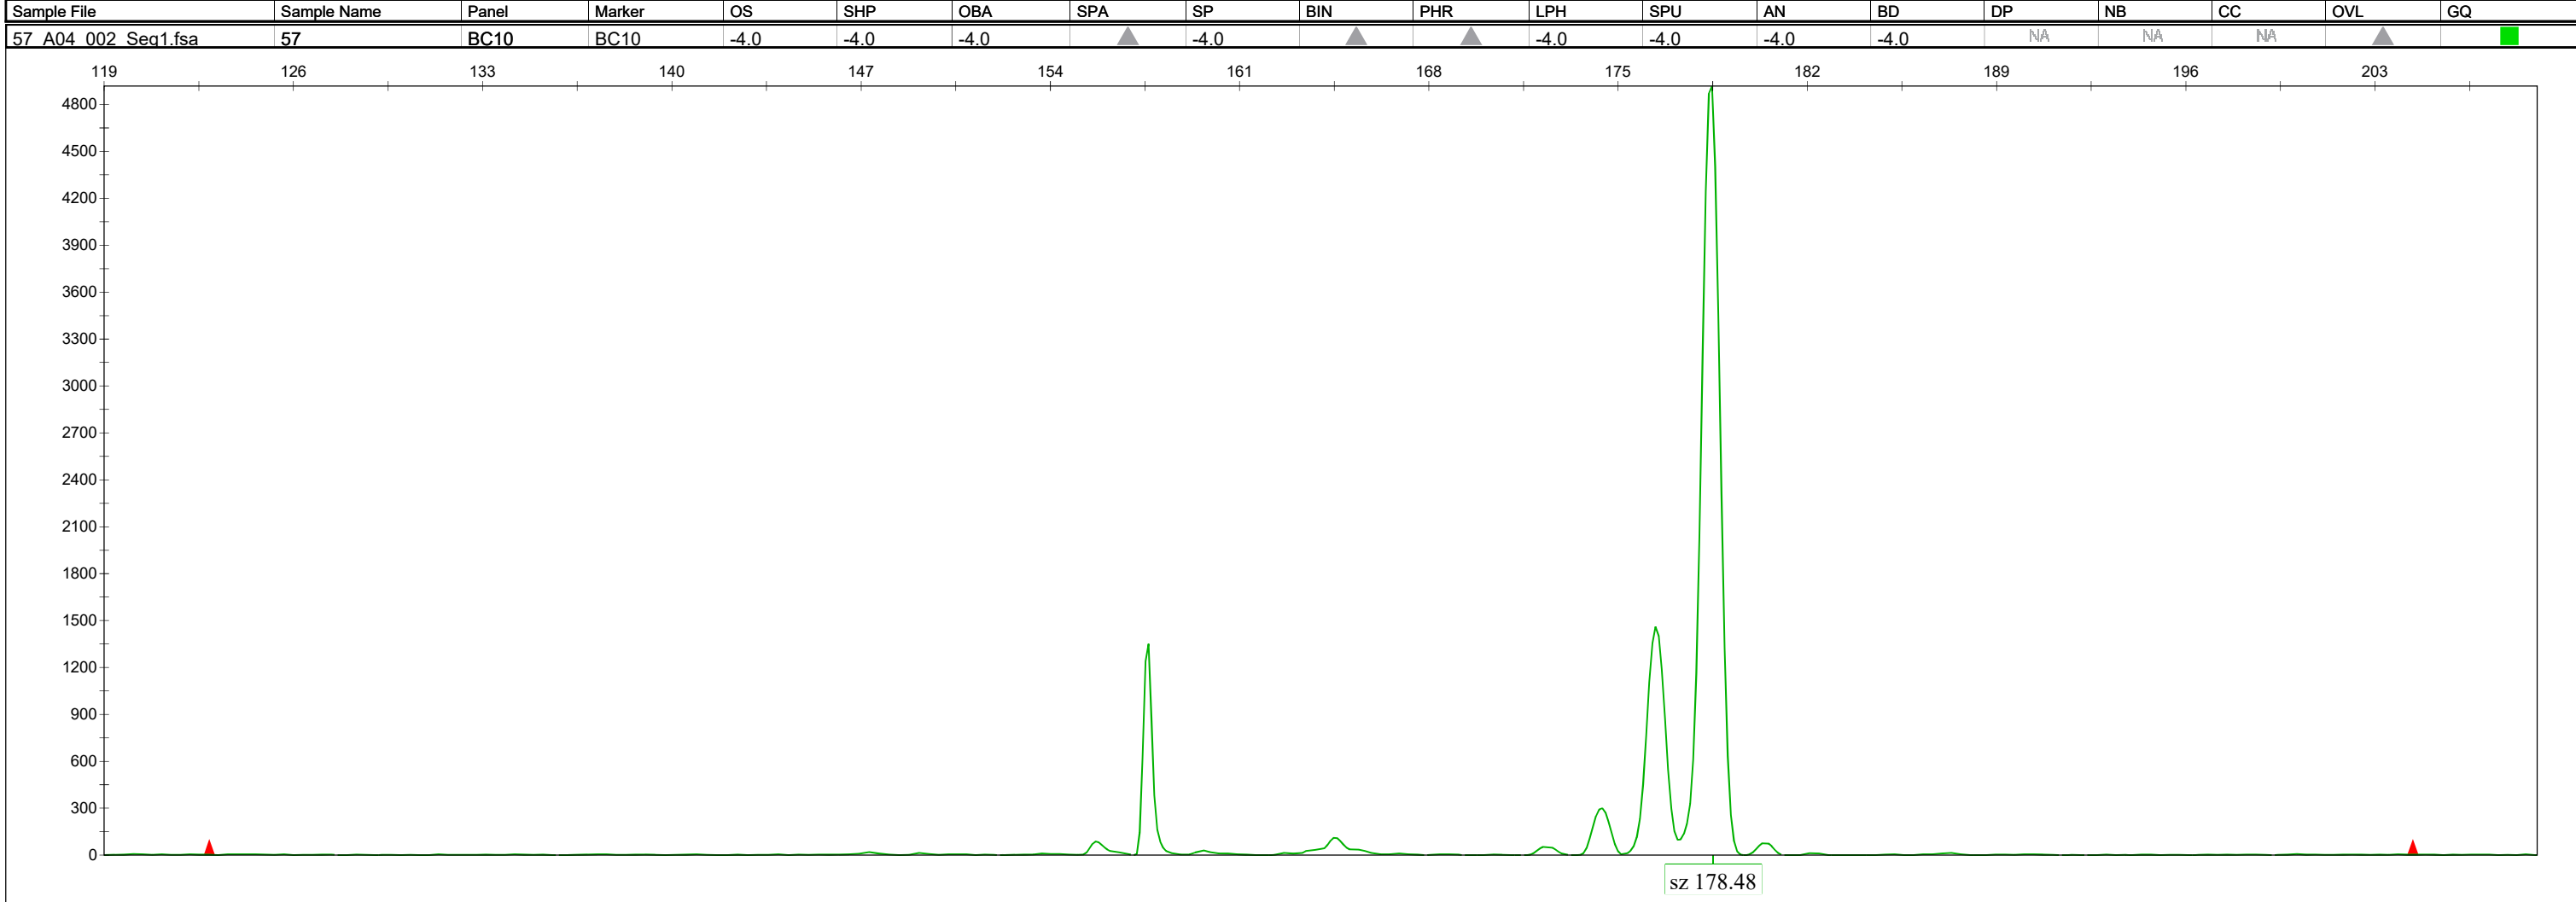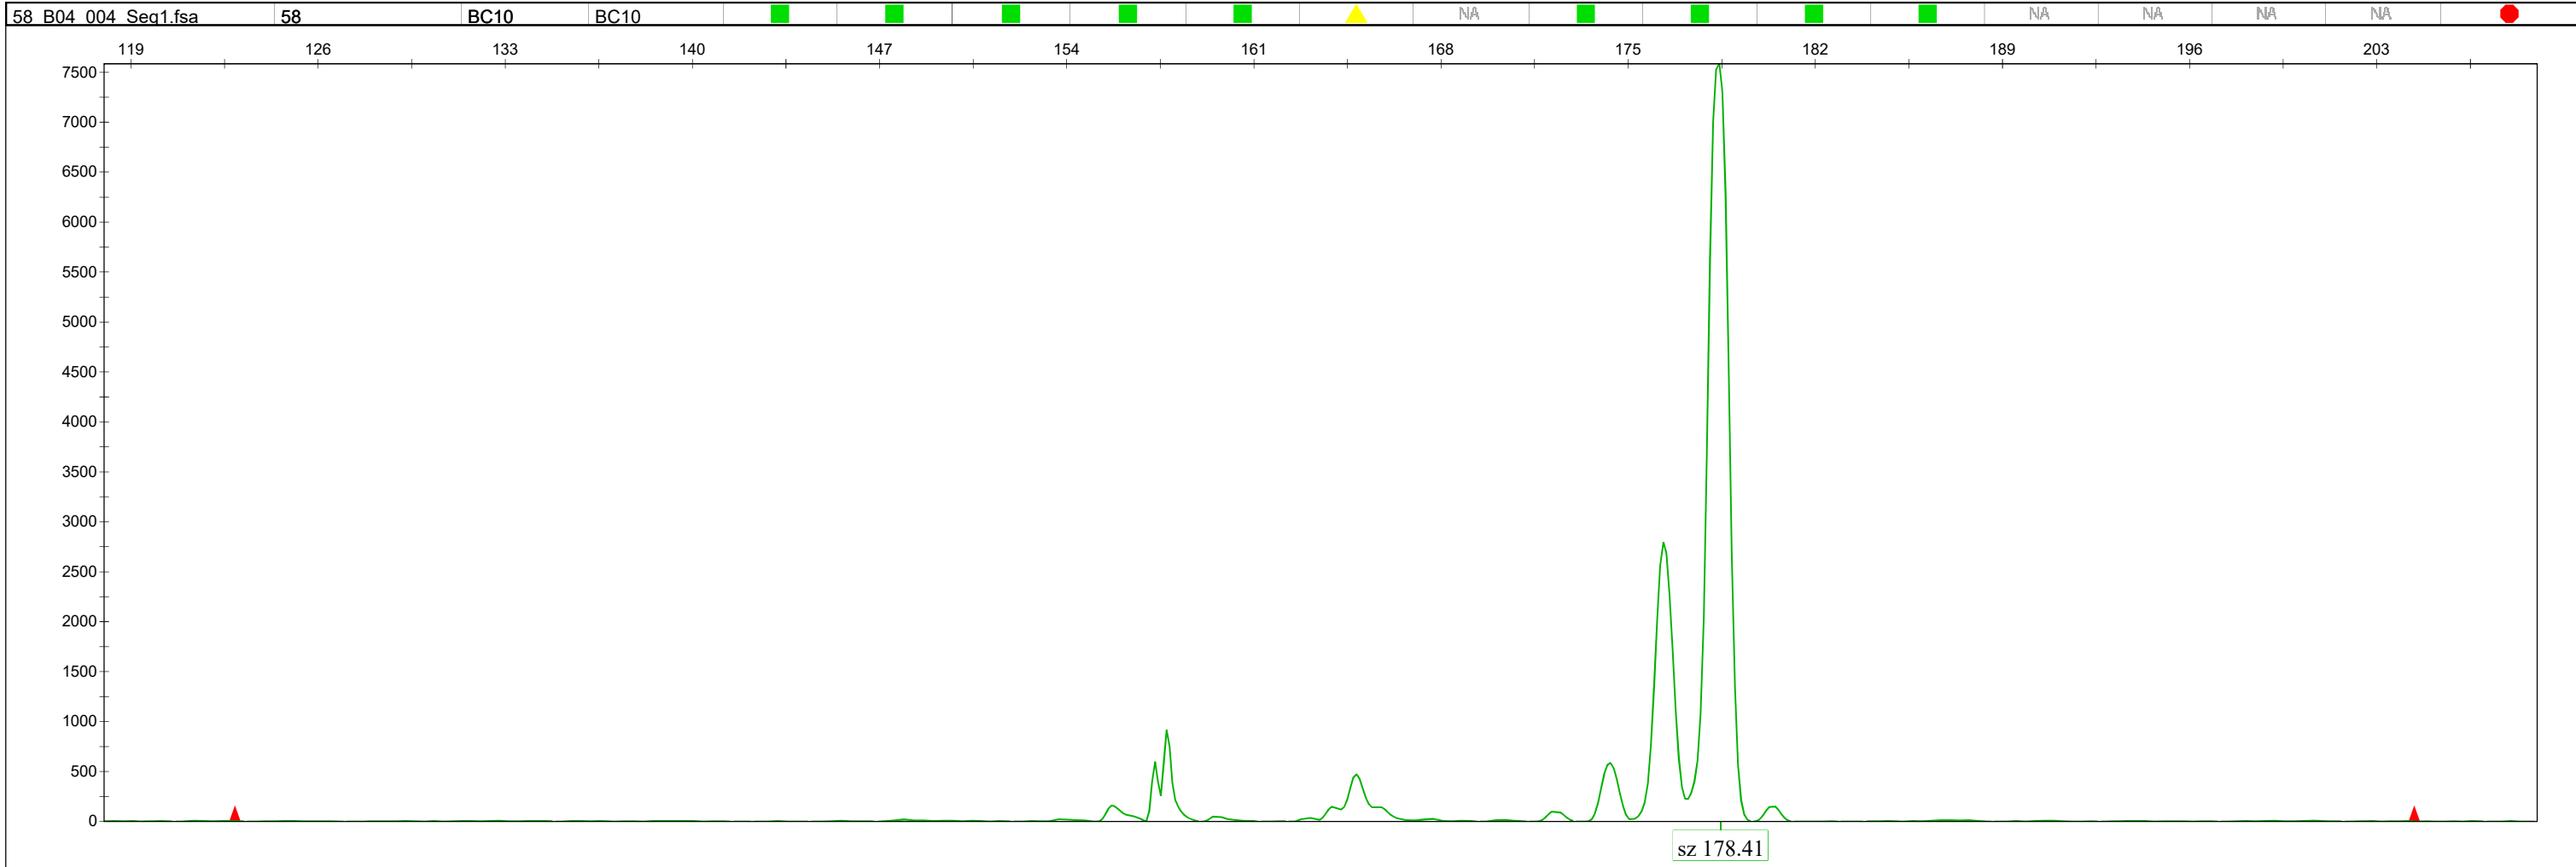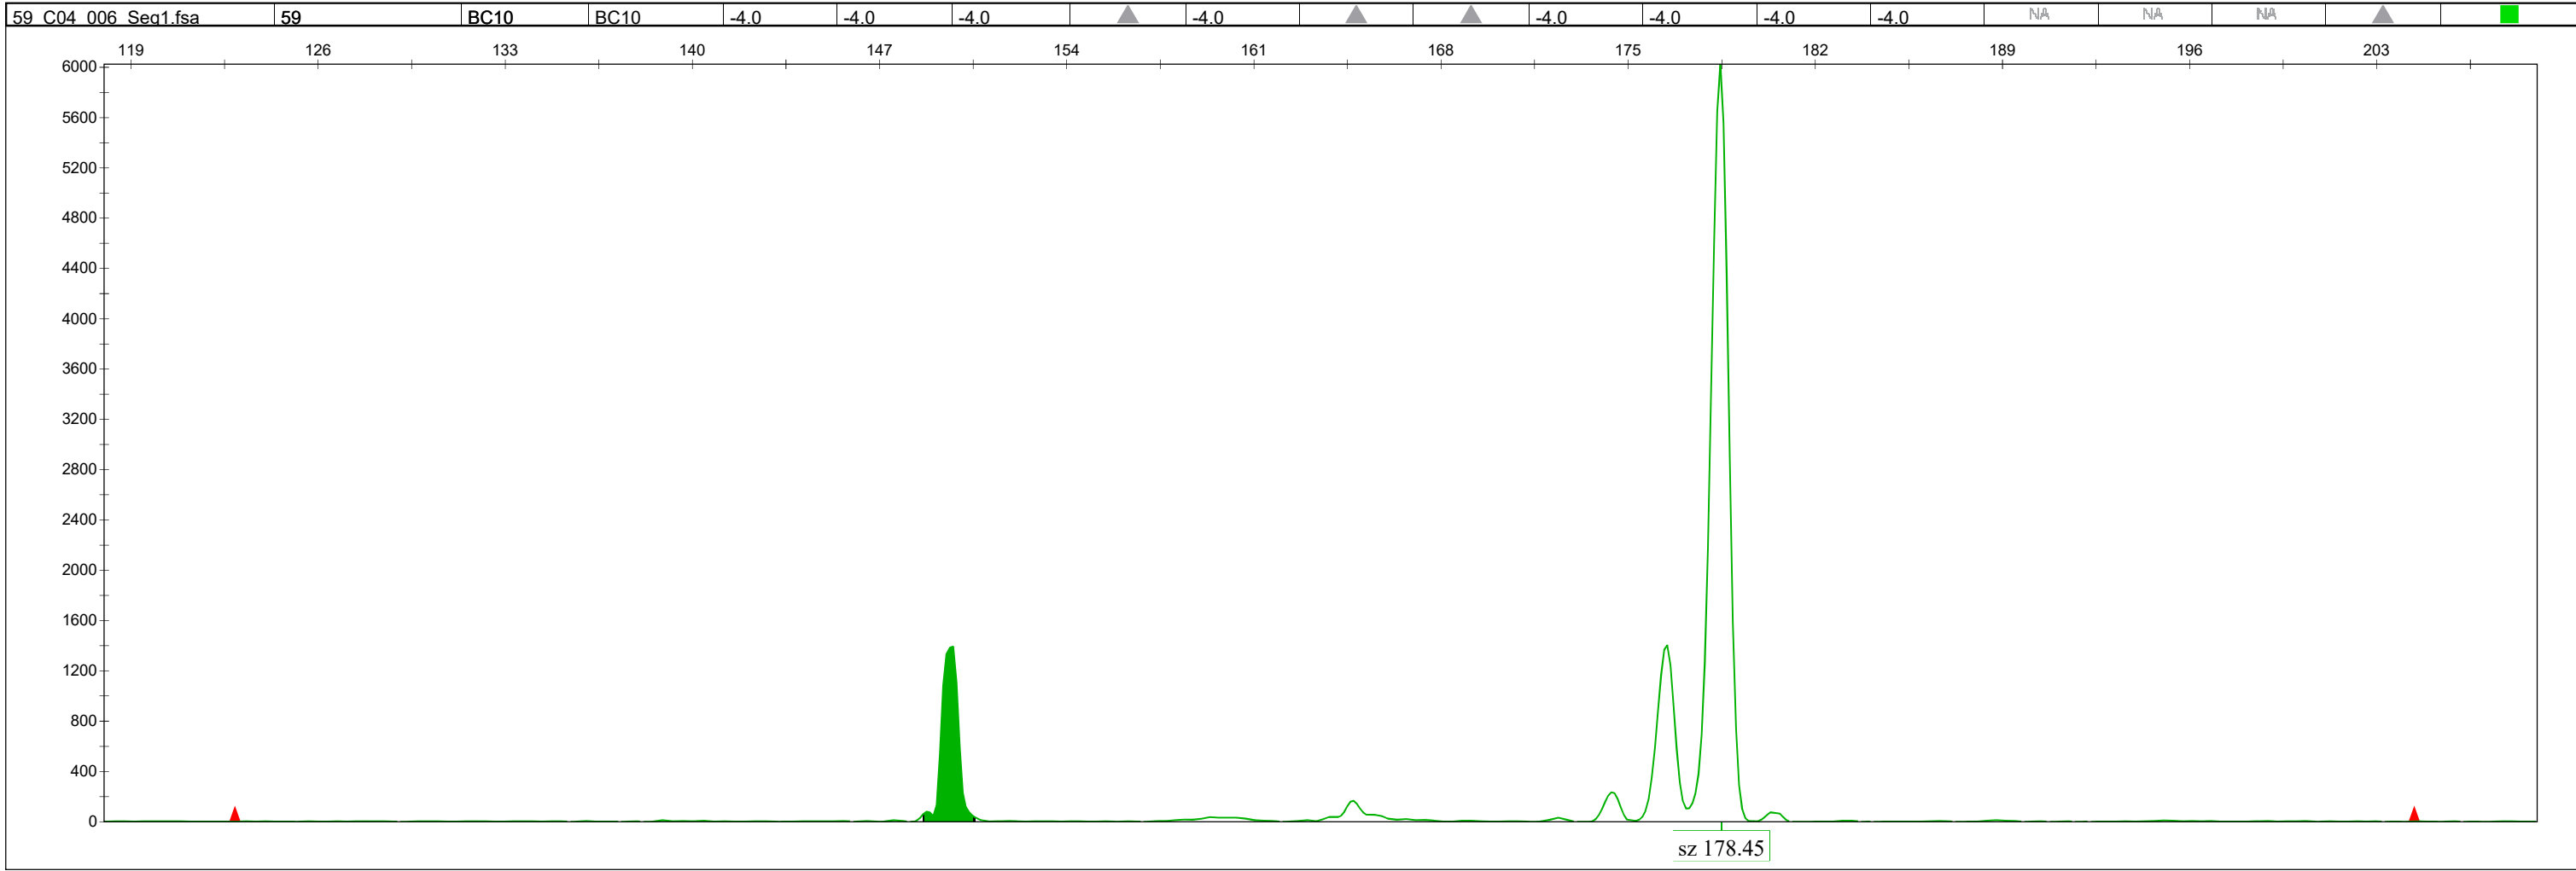

Supplement: s1 [file s1]

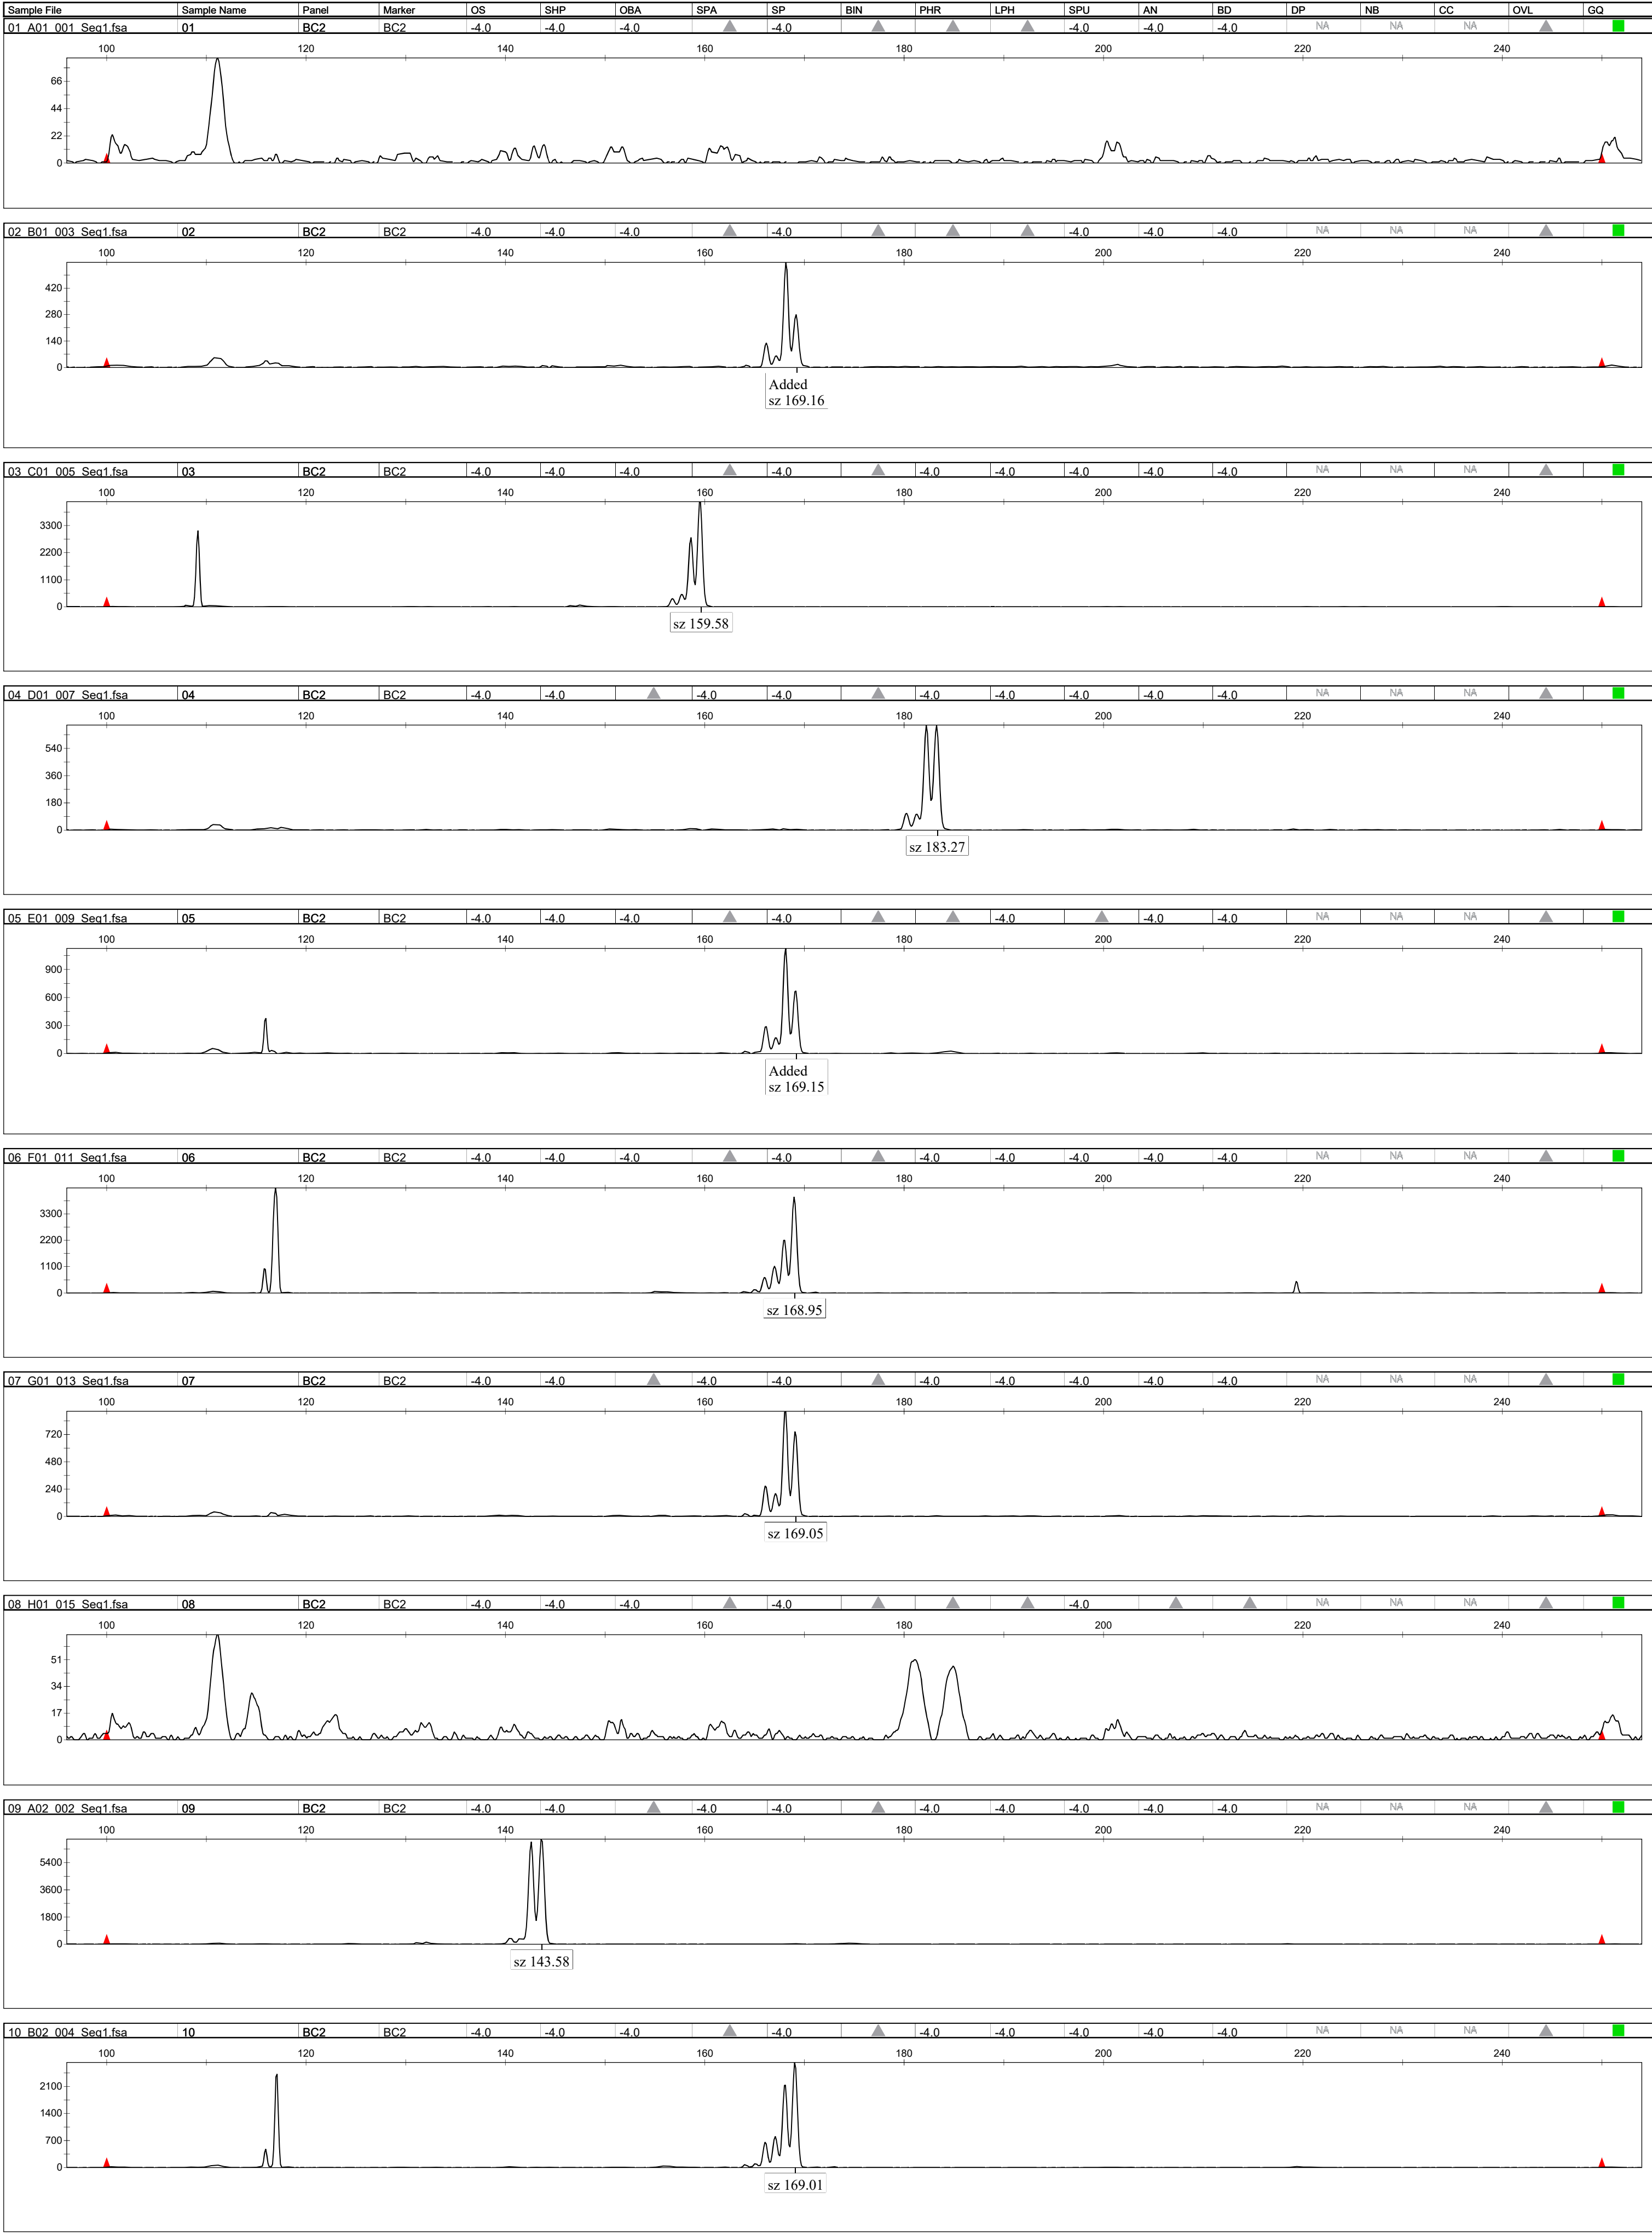

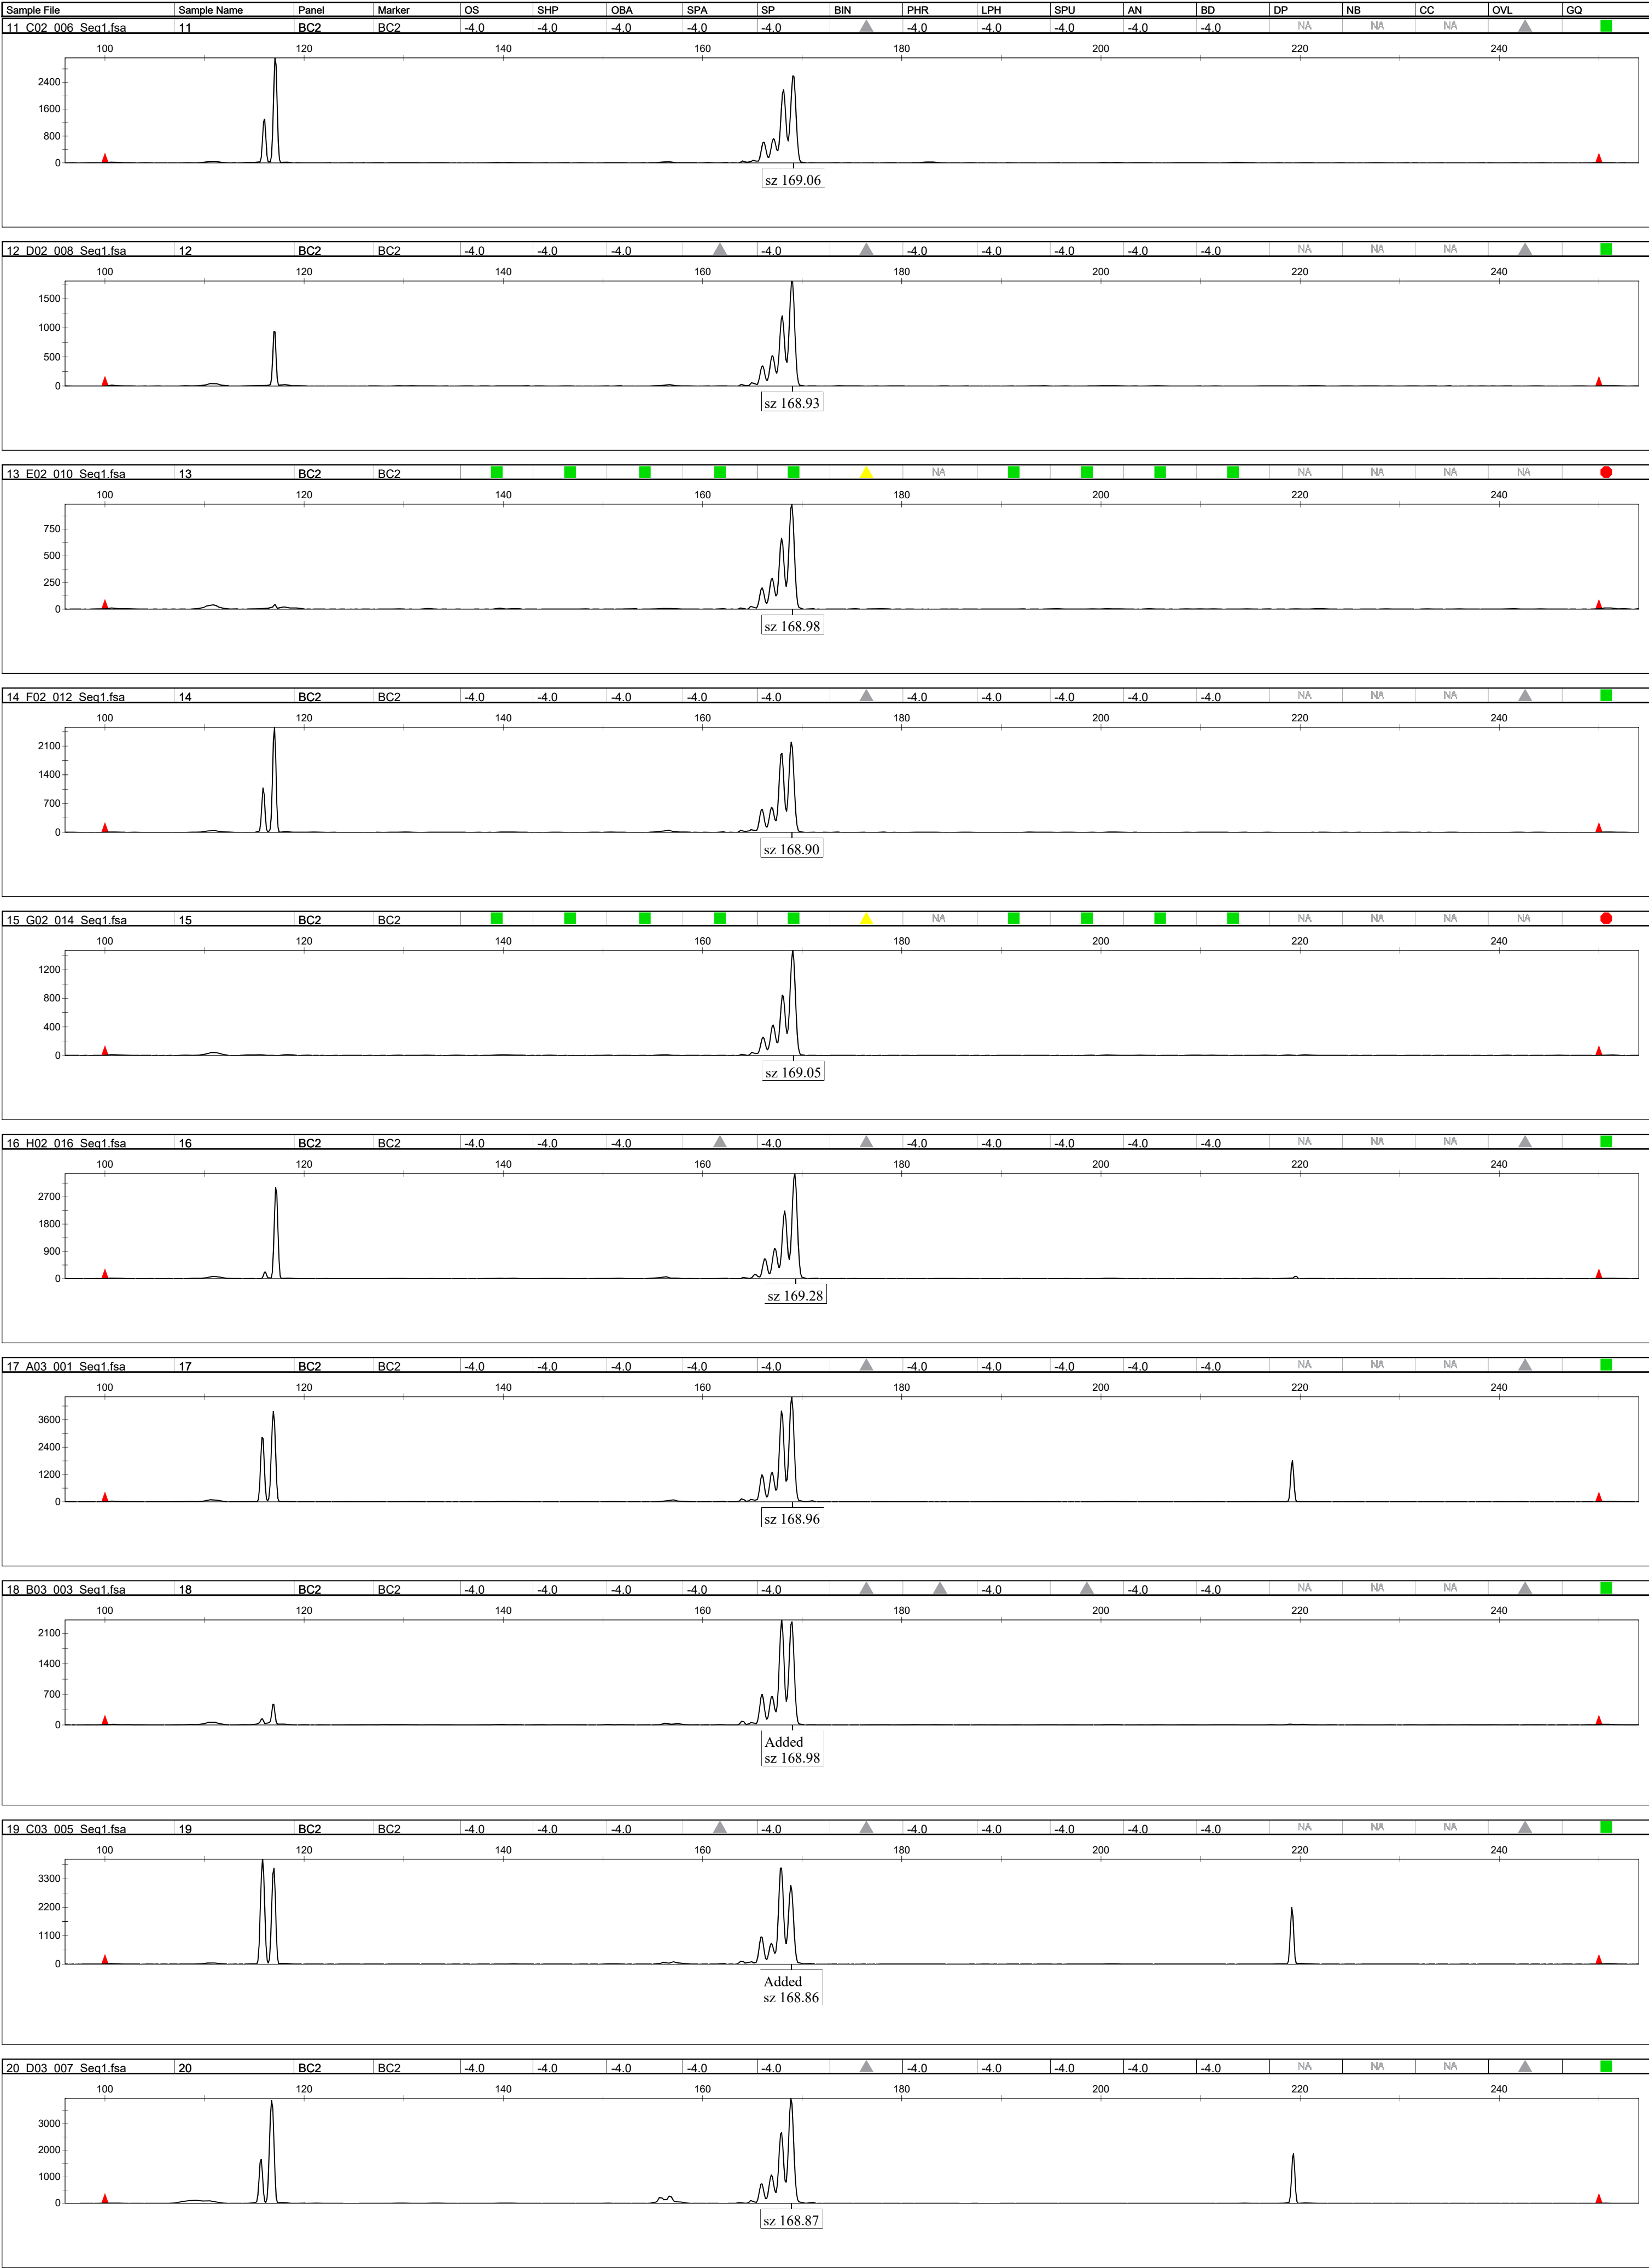

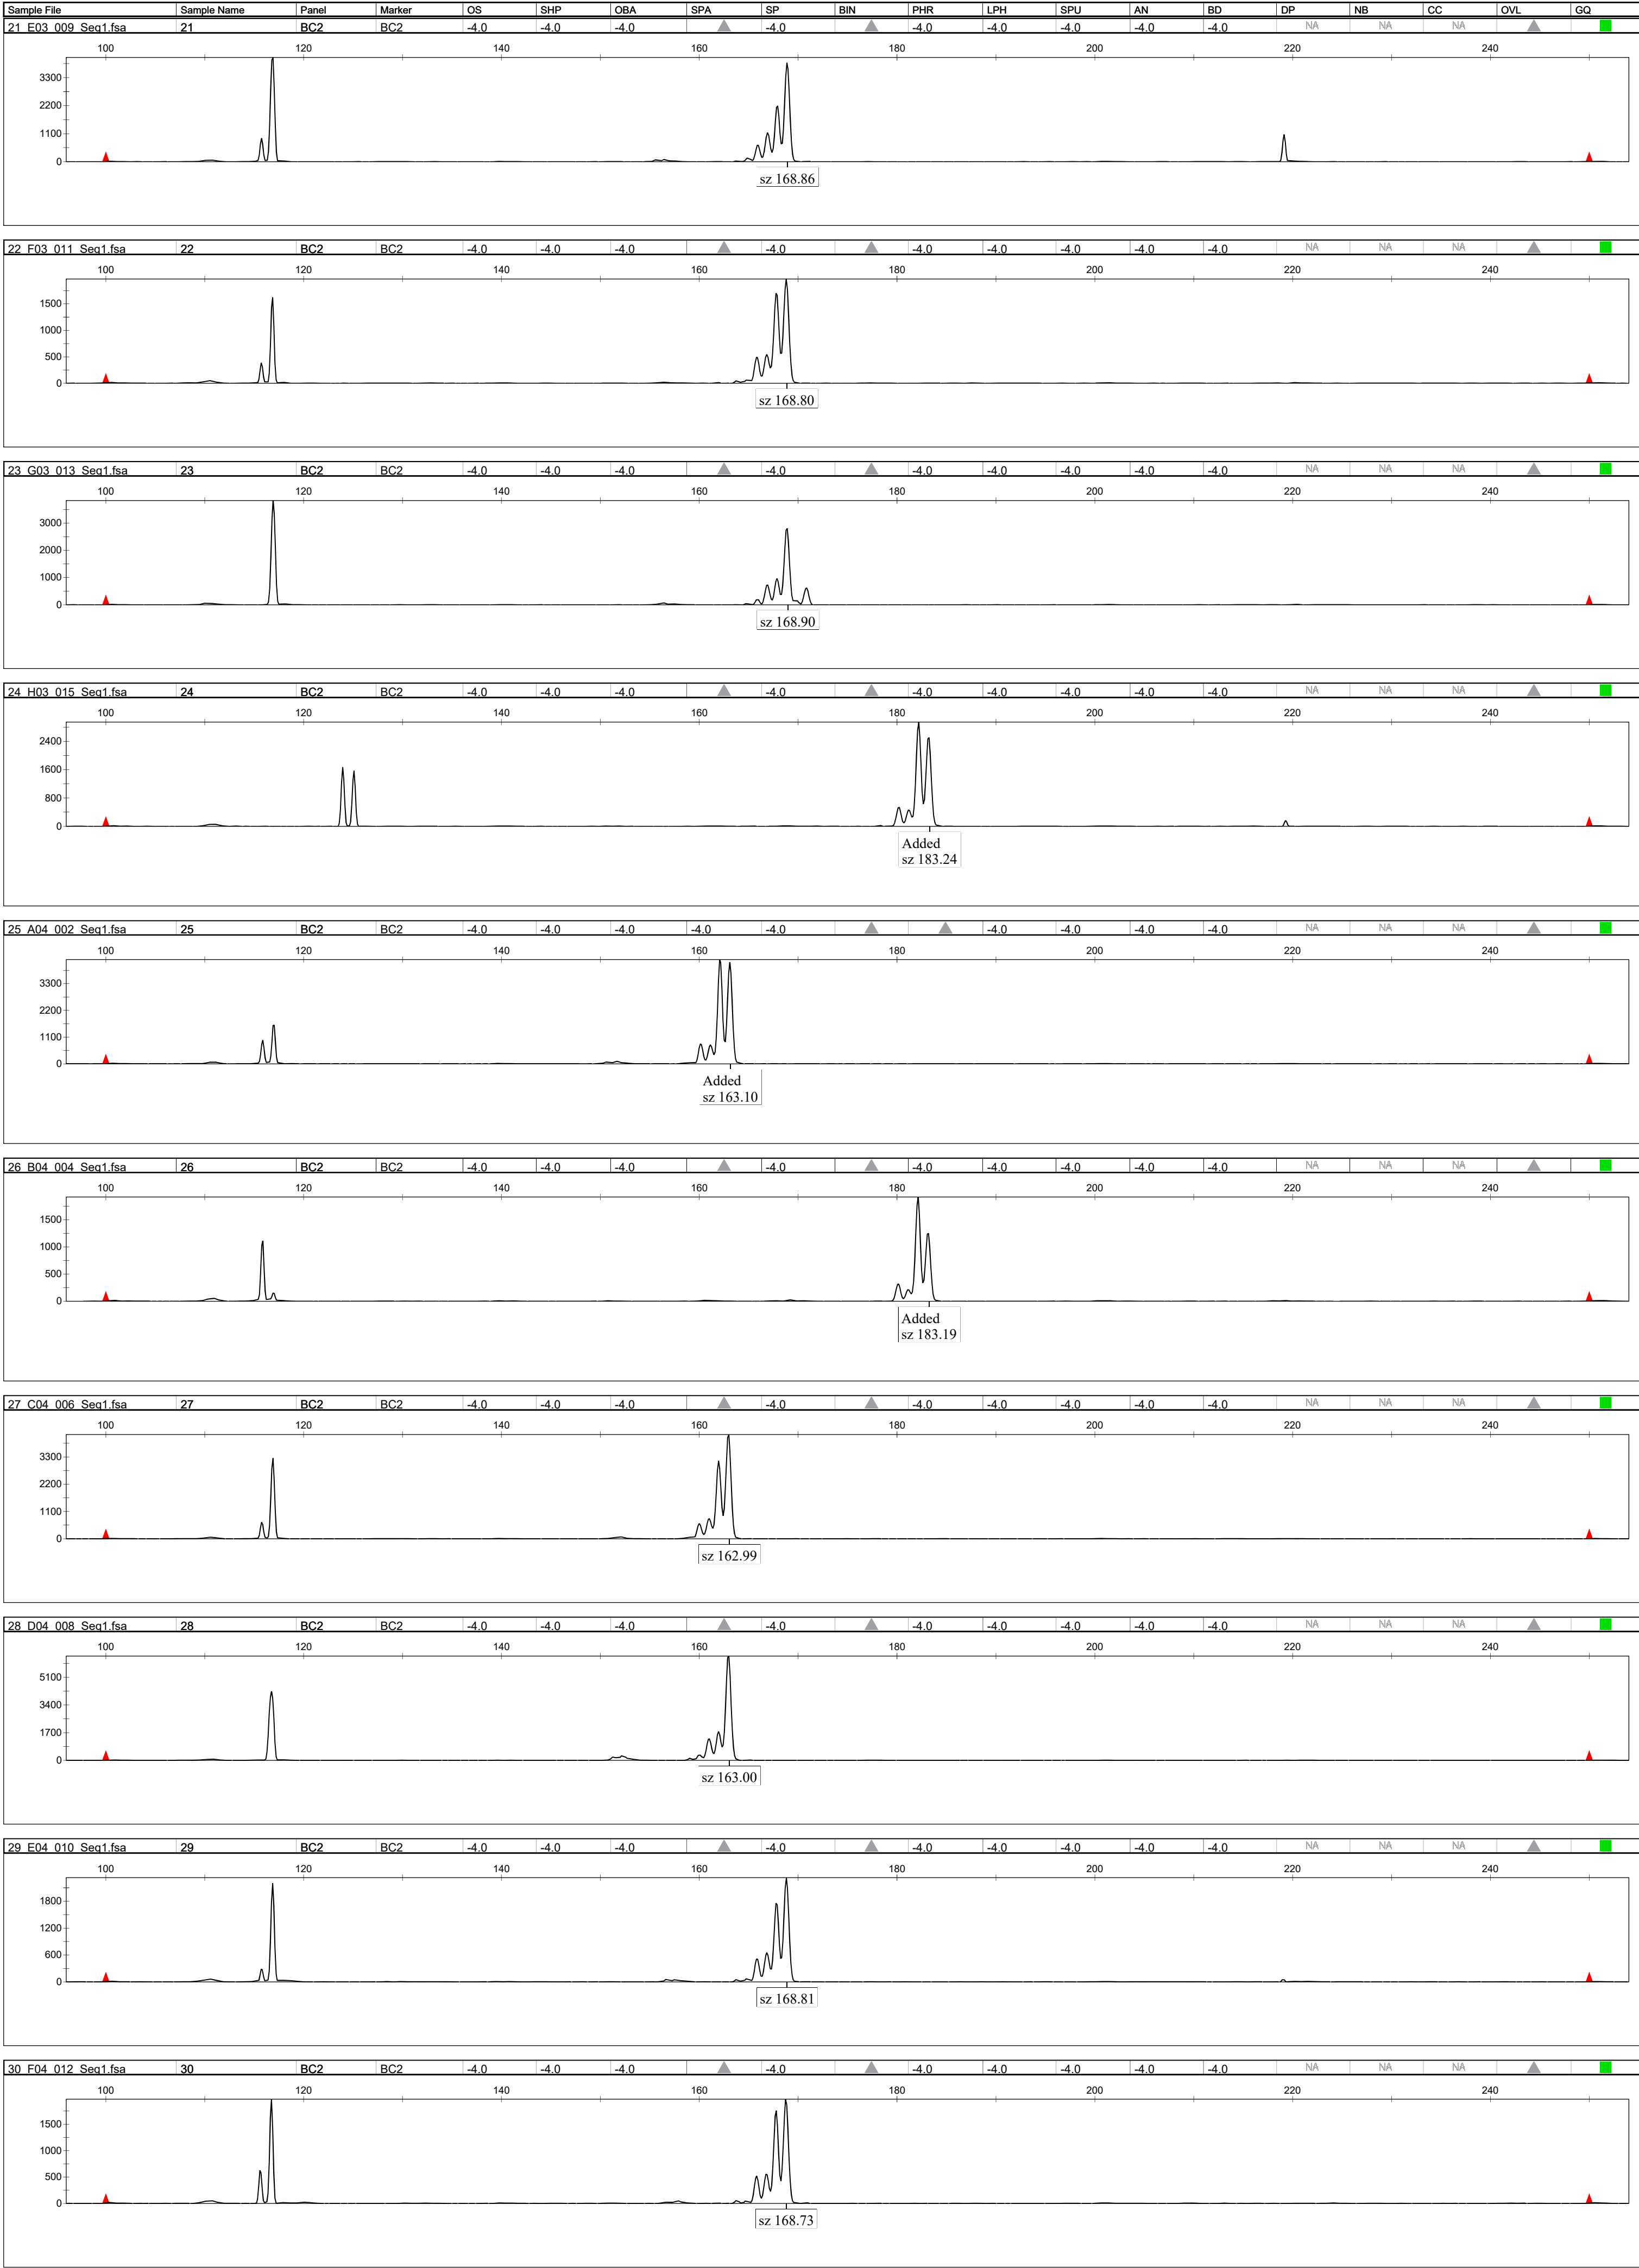

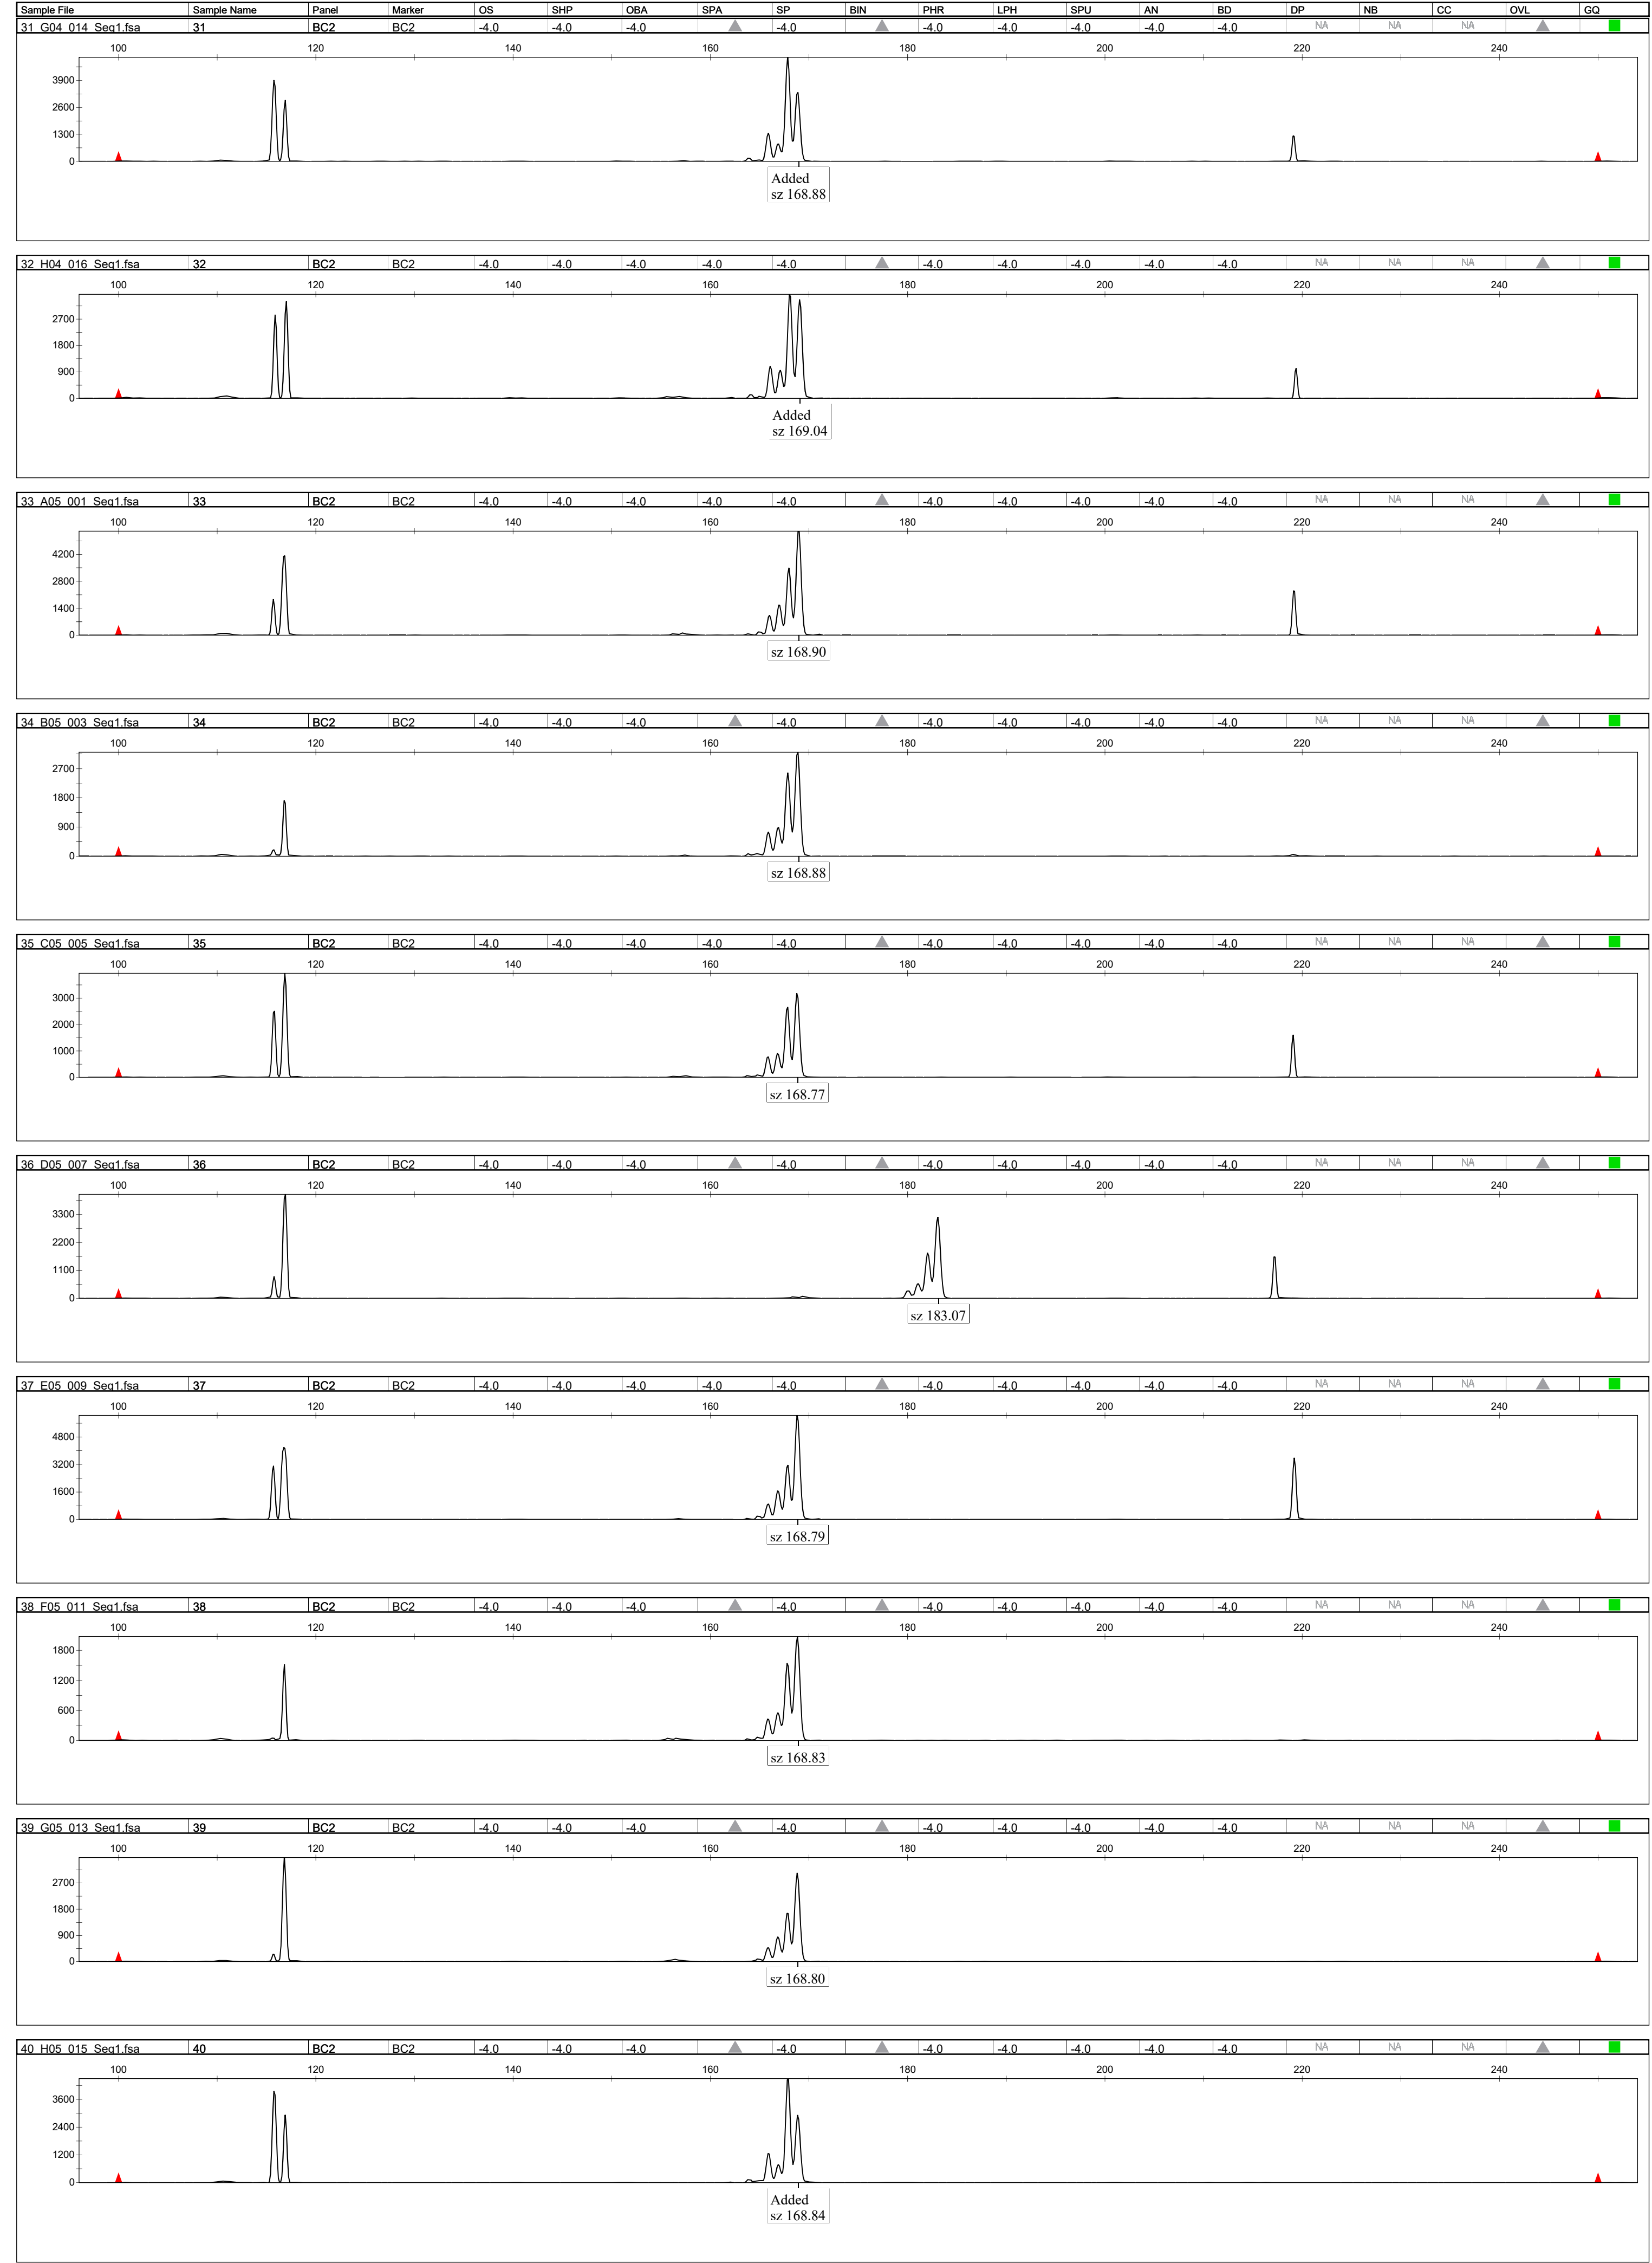

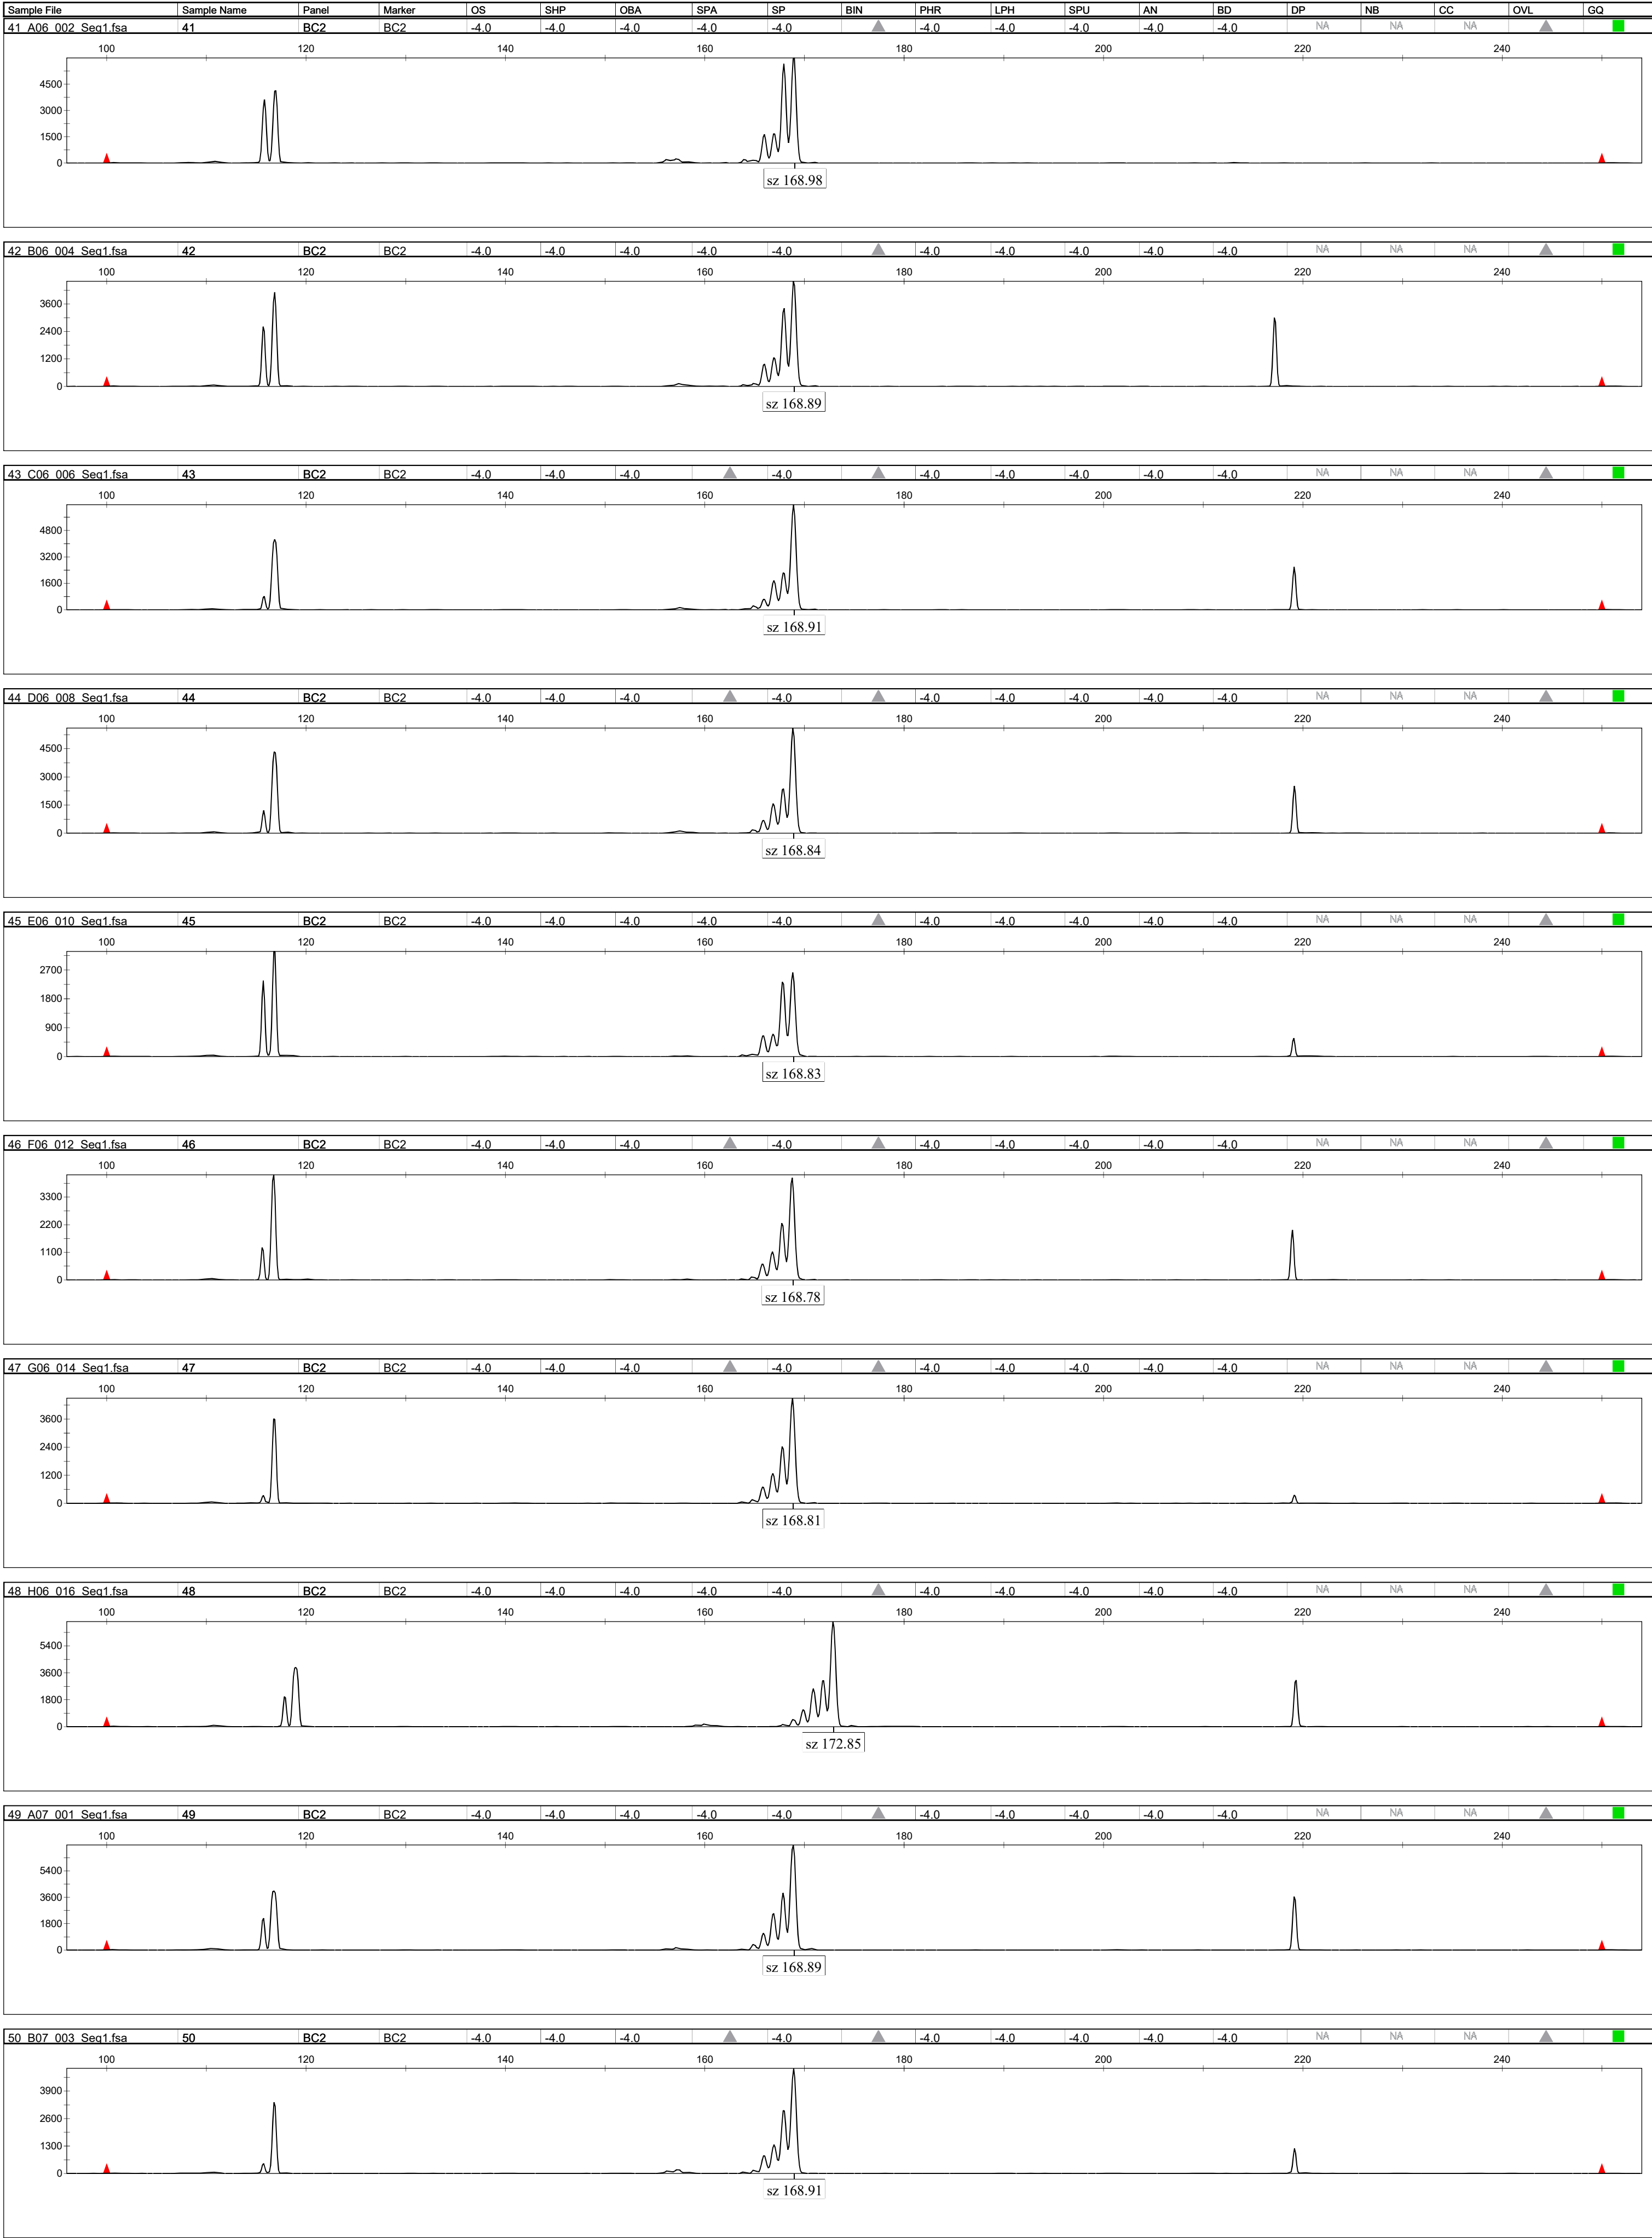

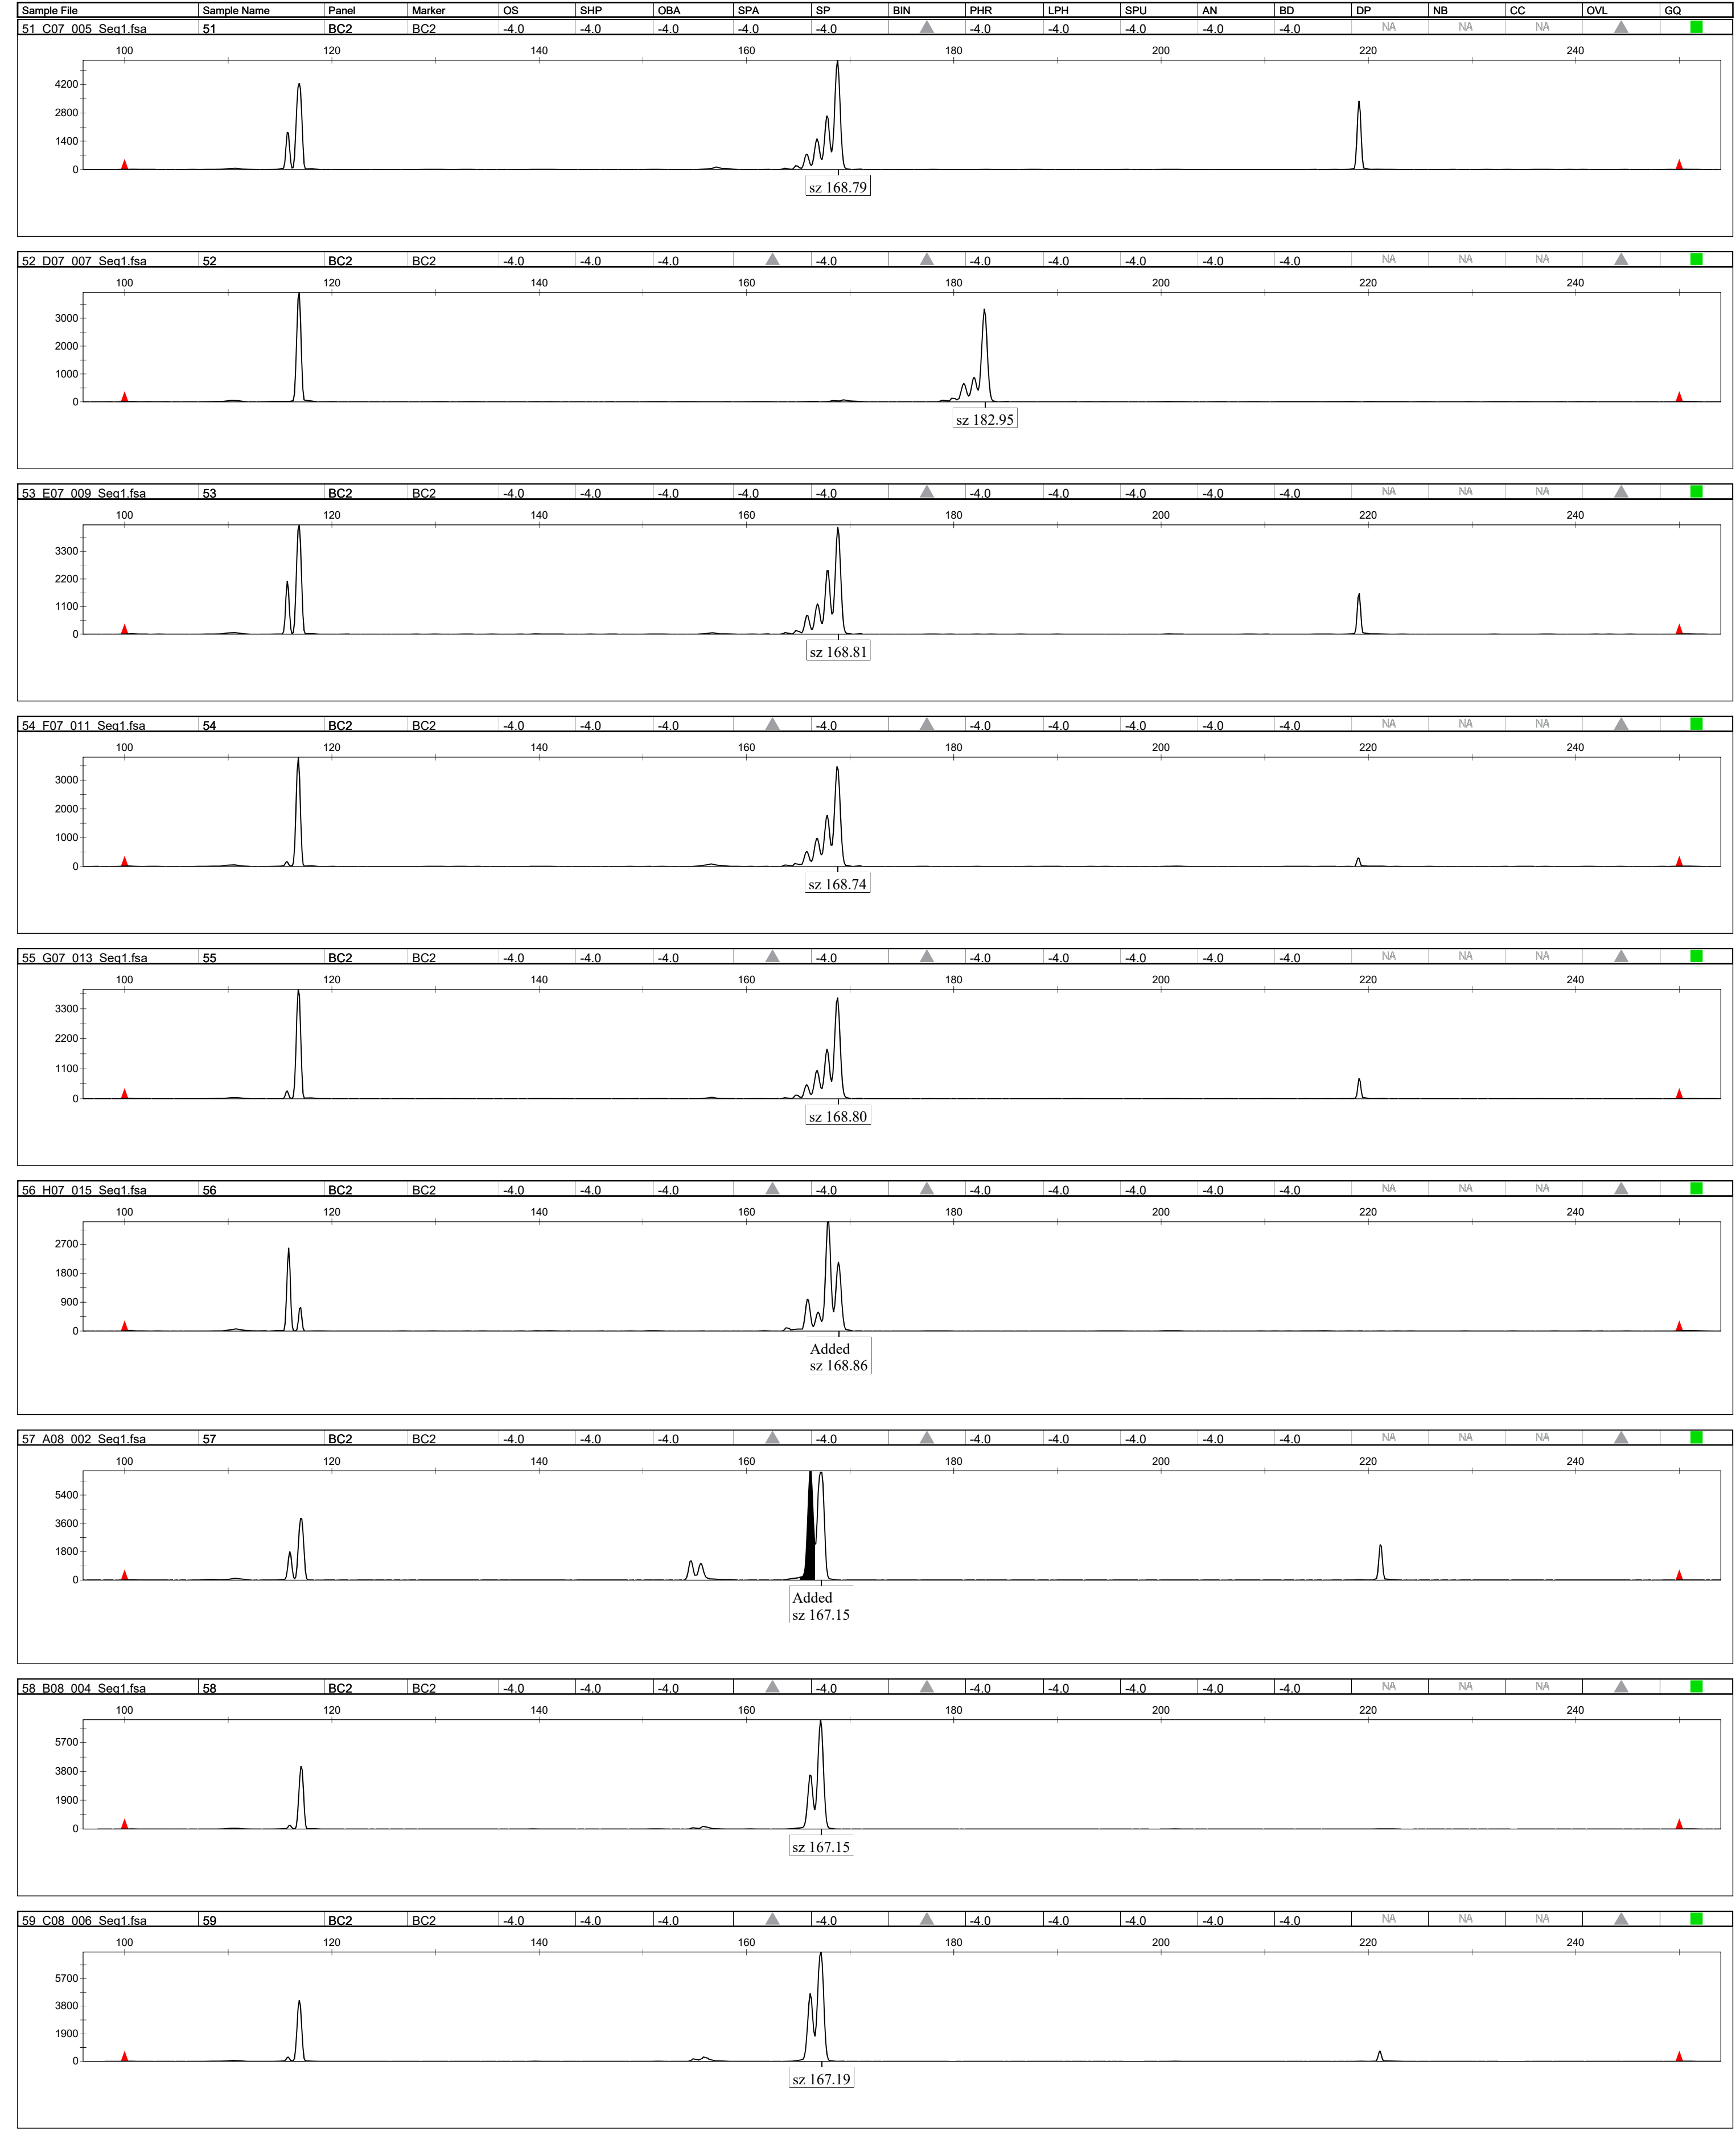

Supplement: s1 [file s1]

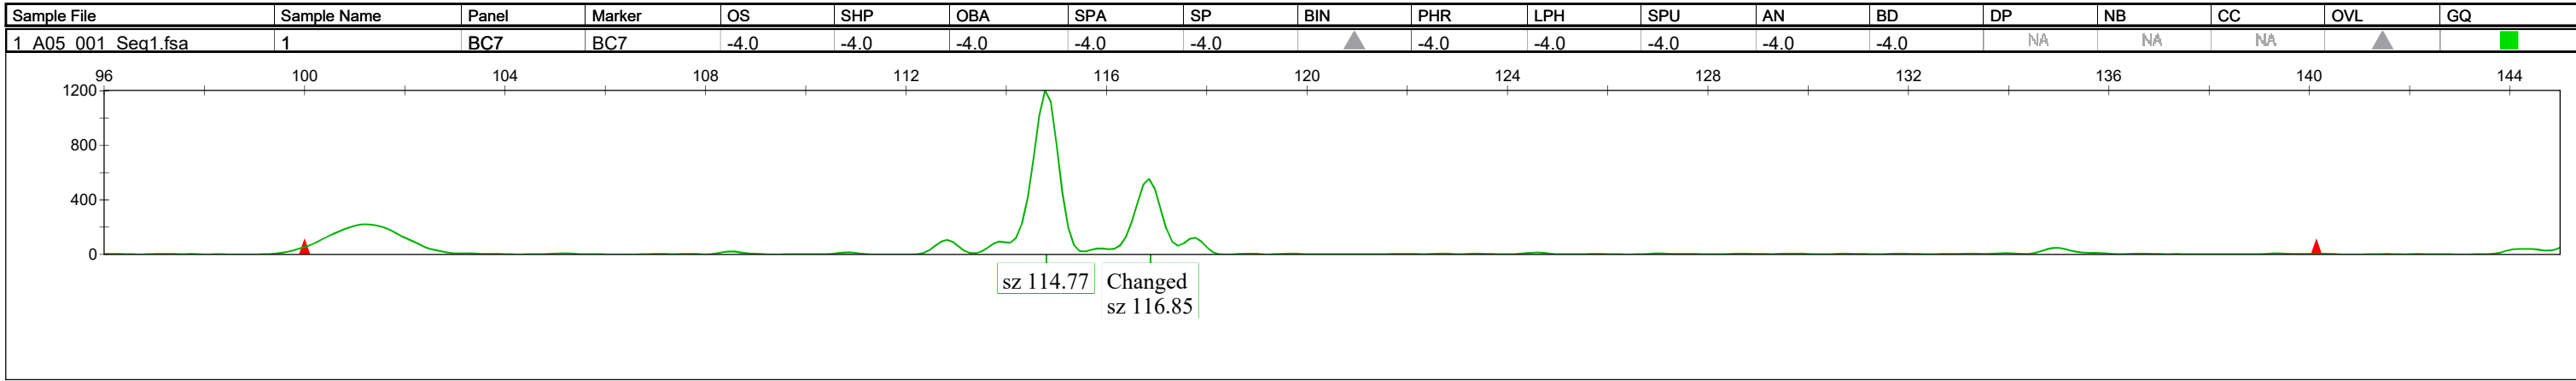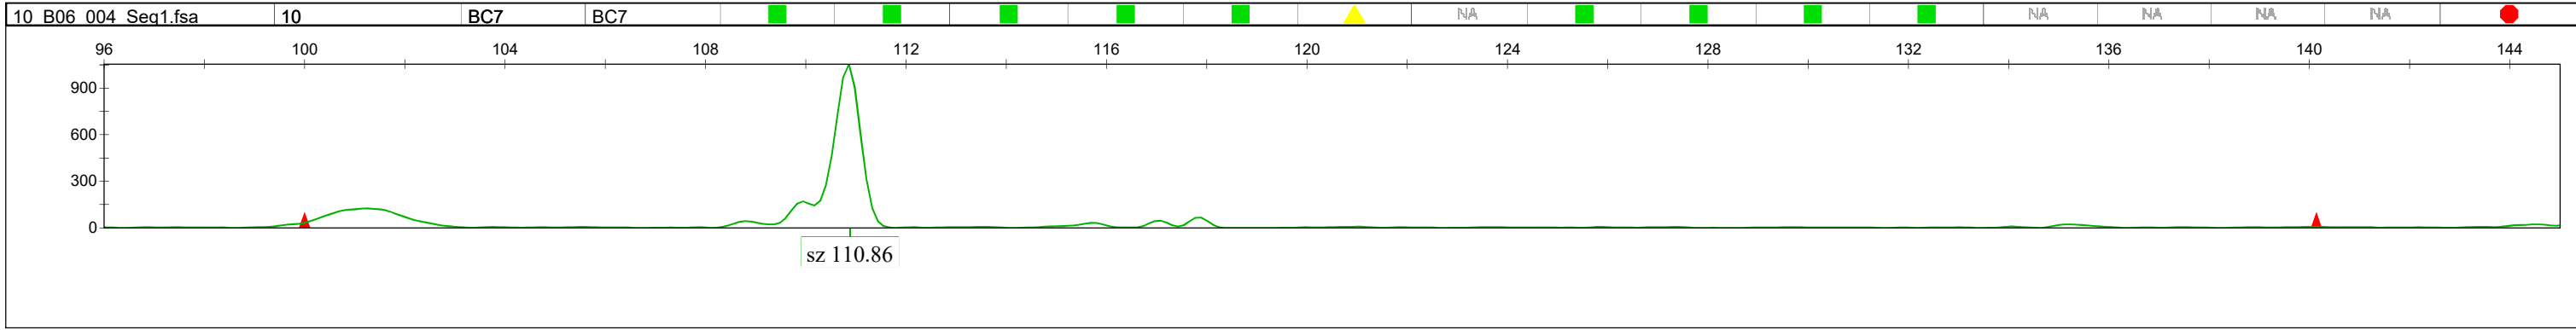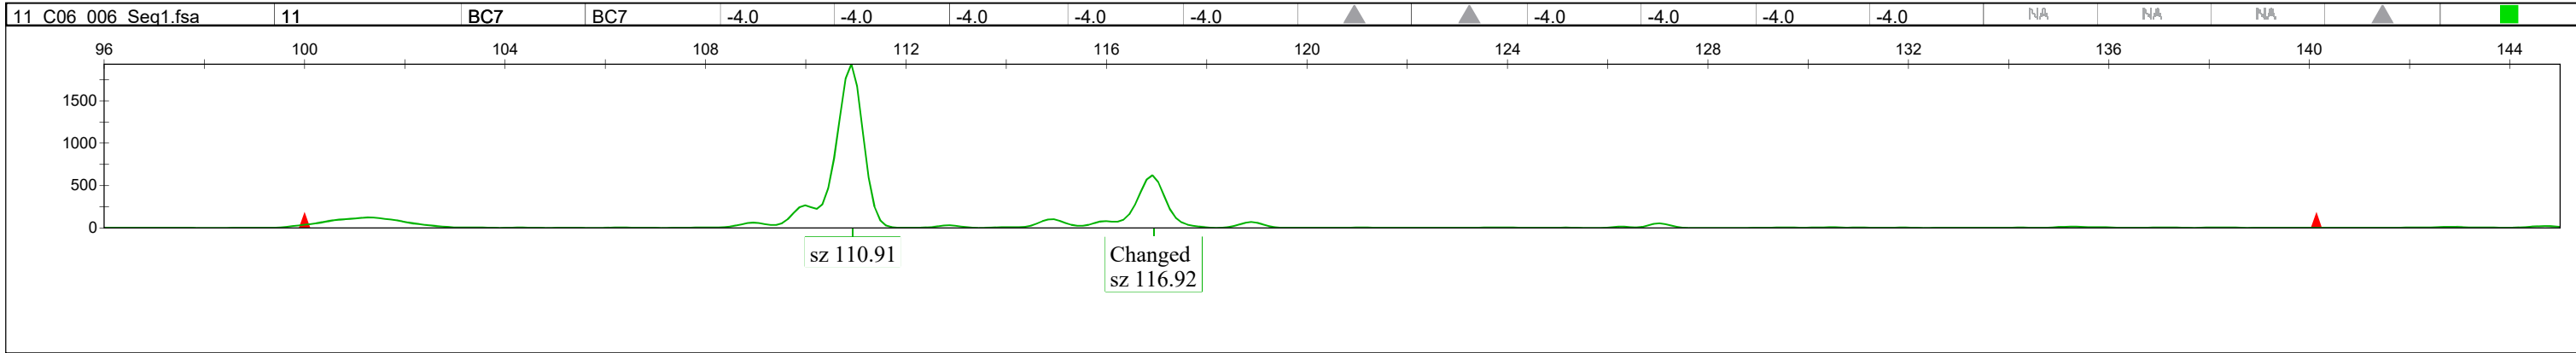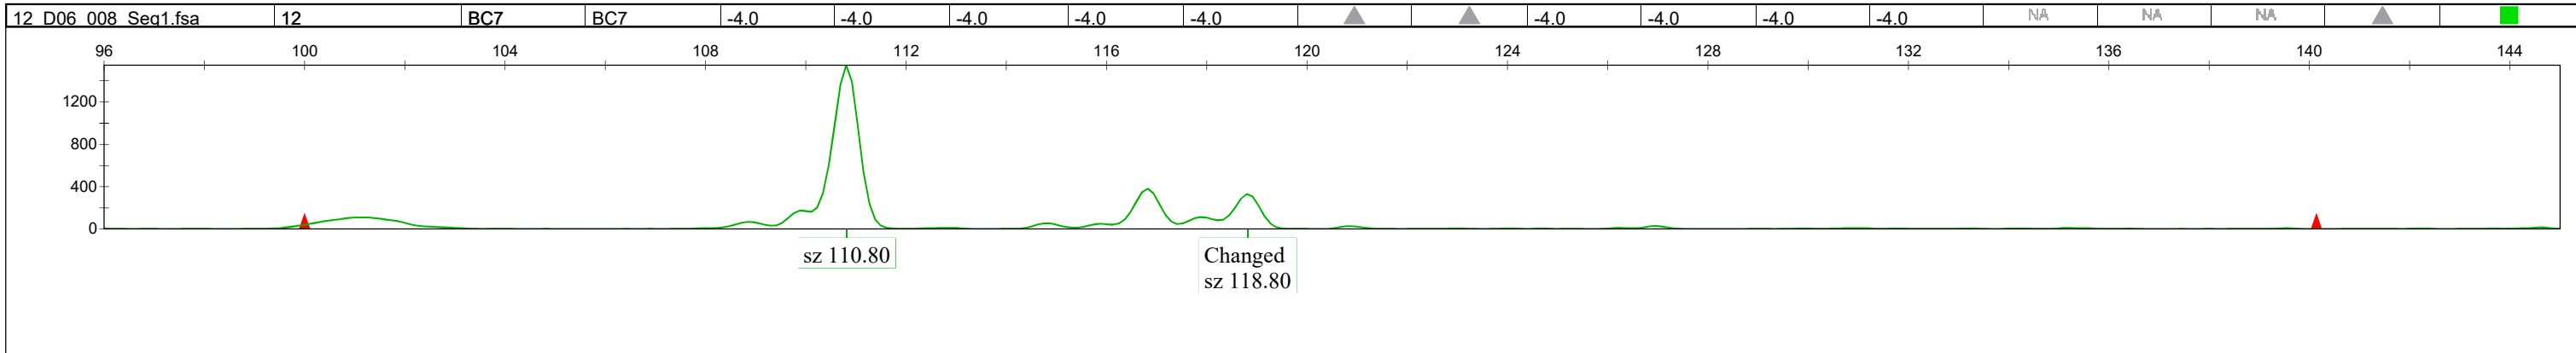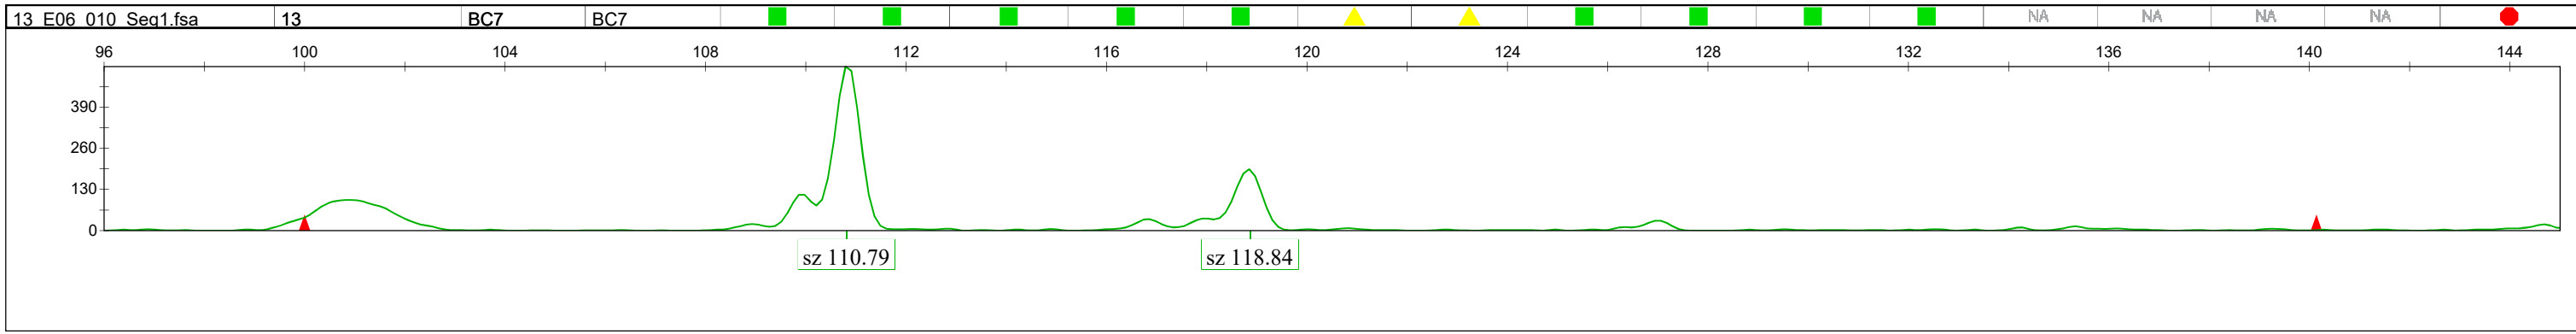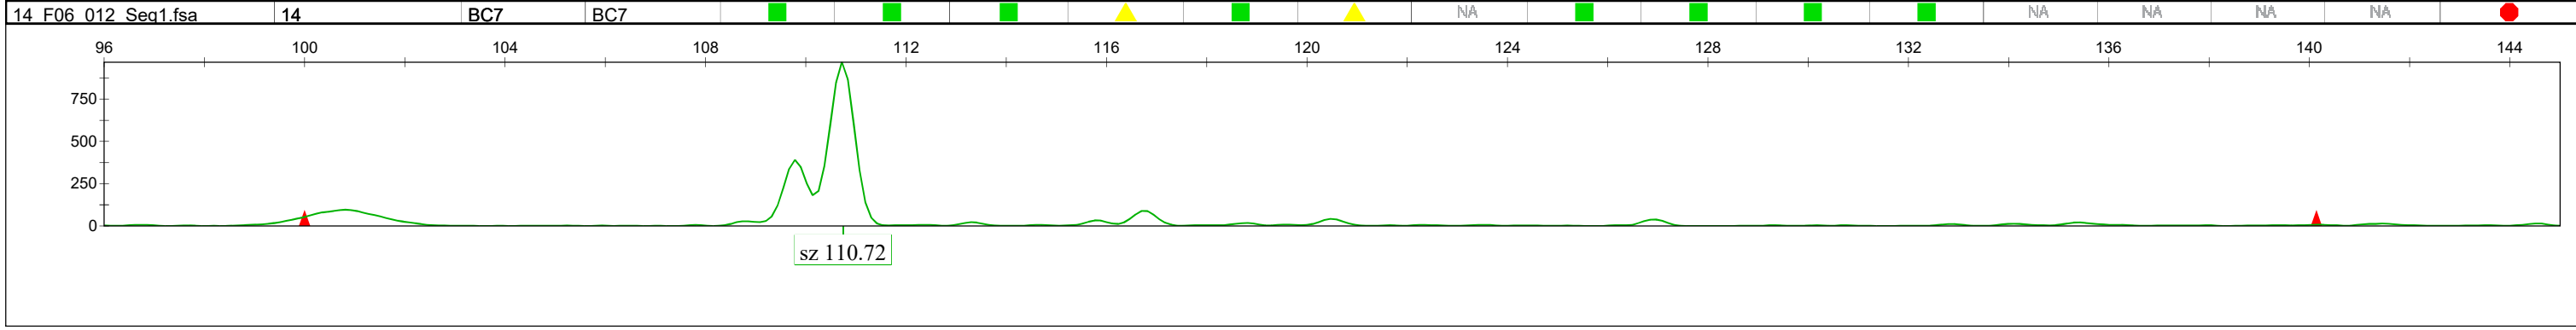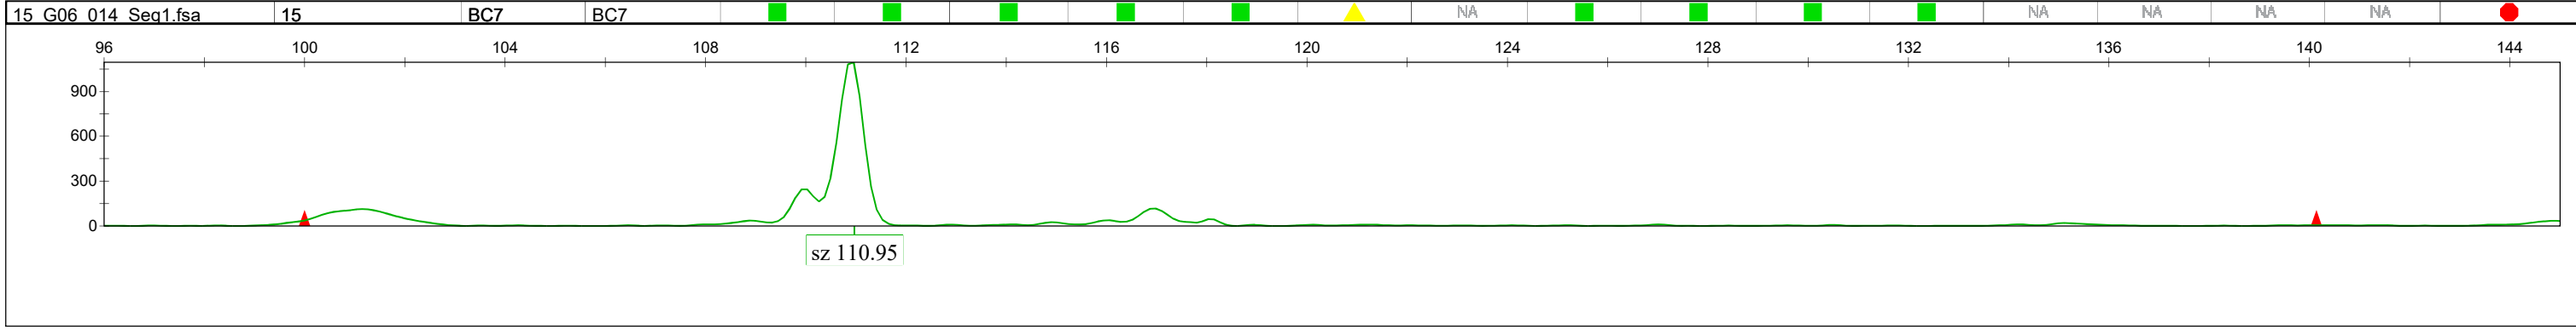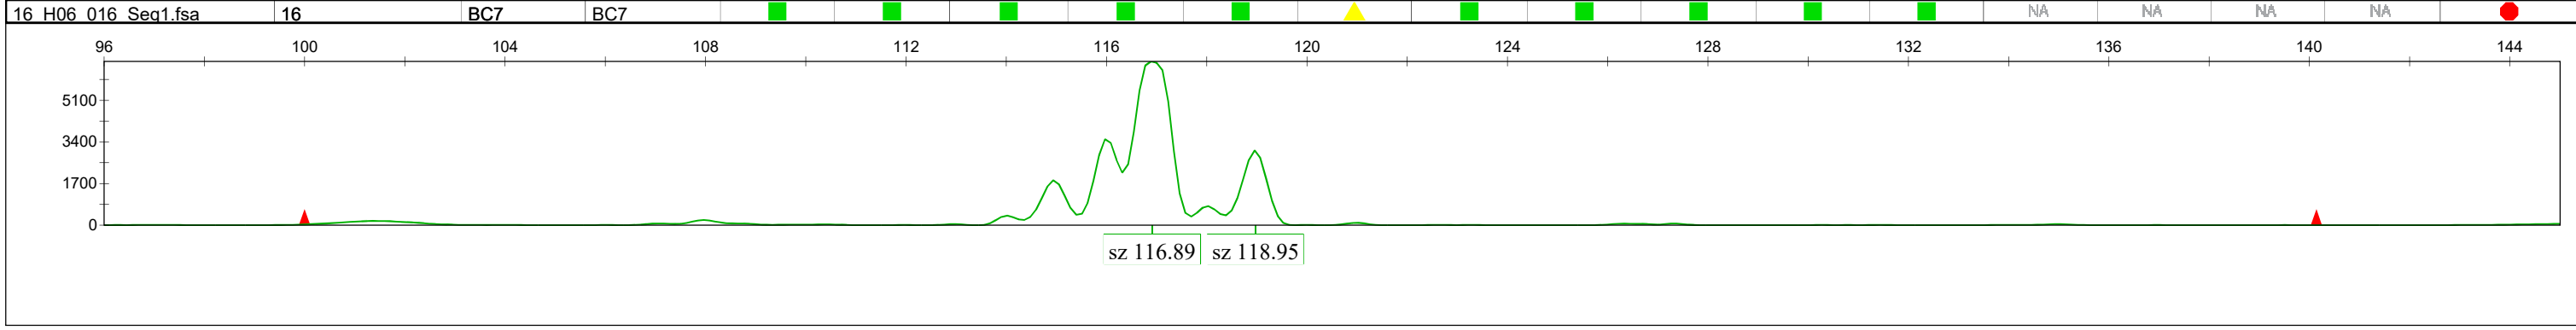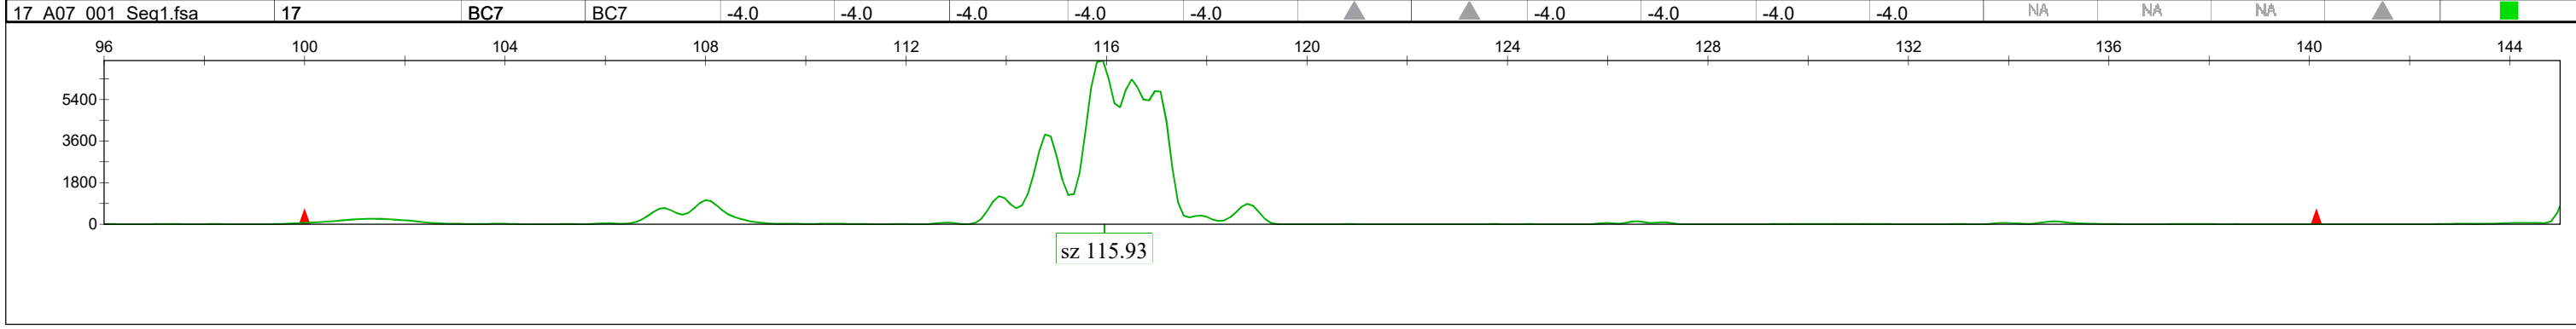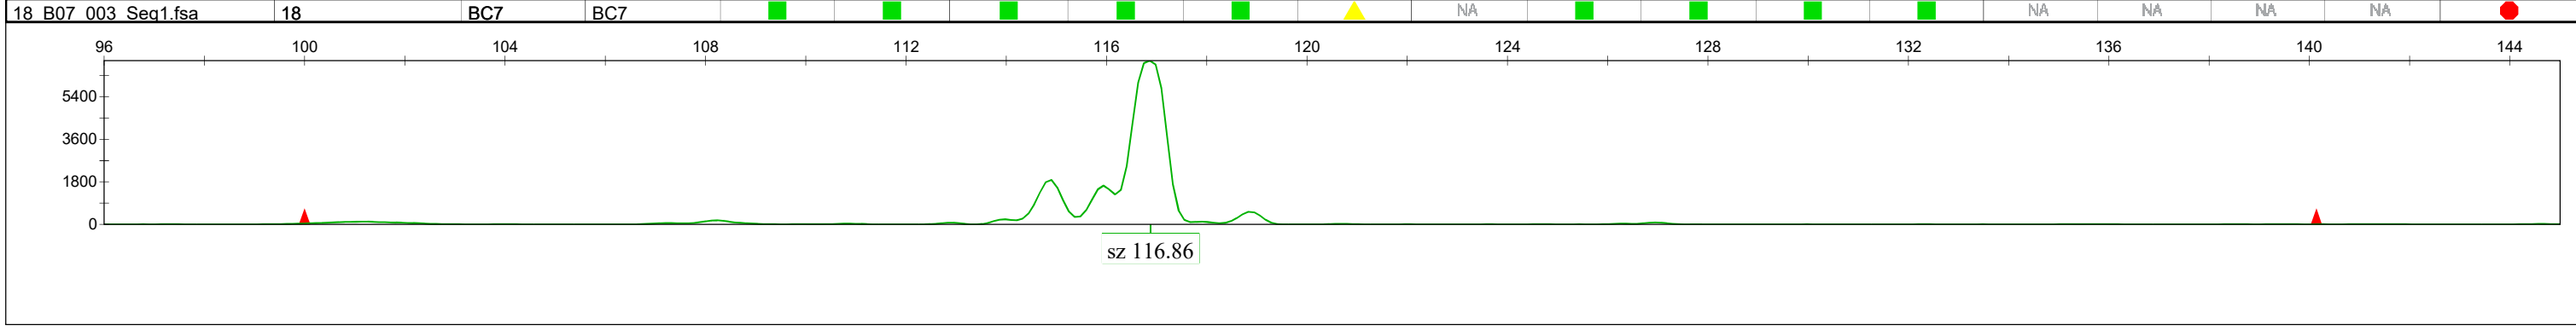

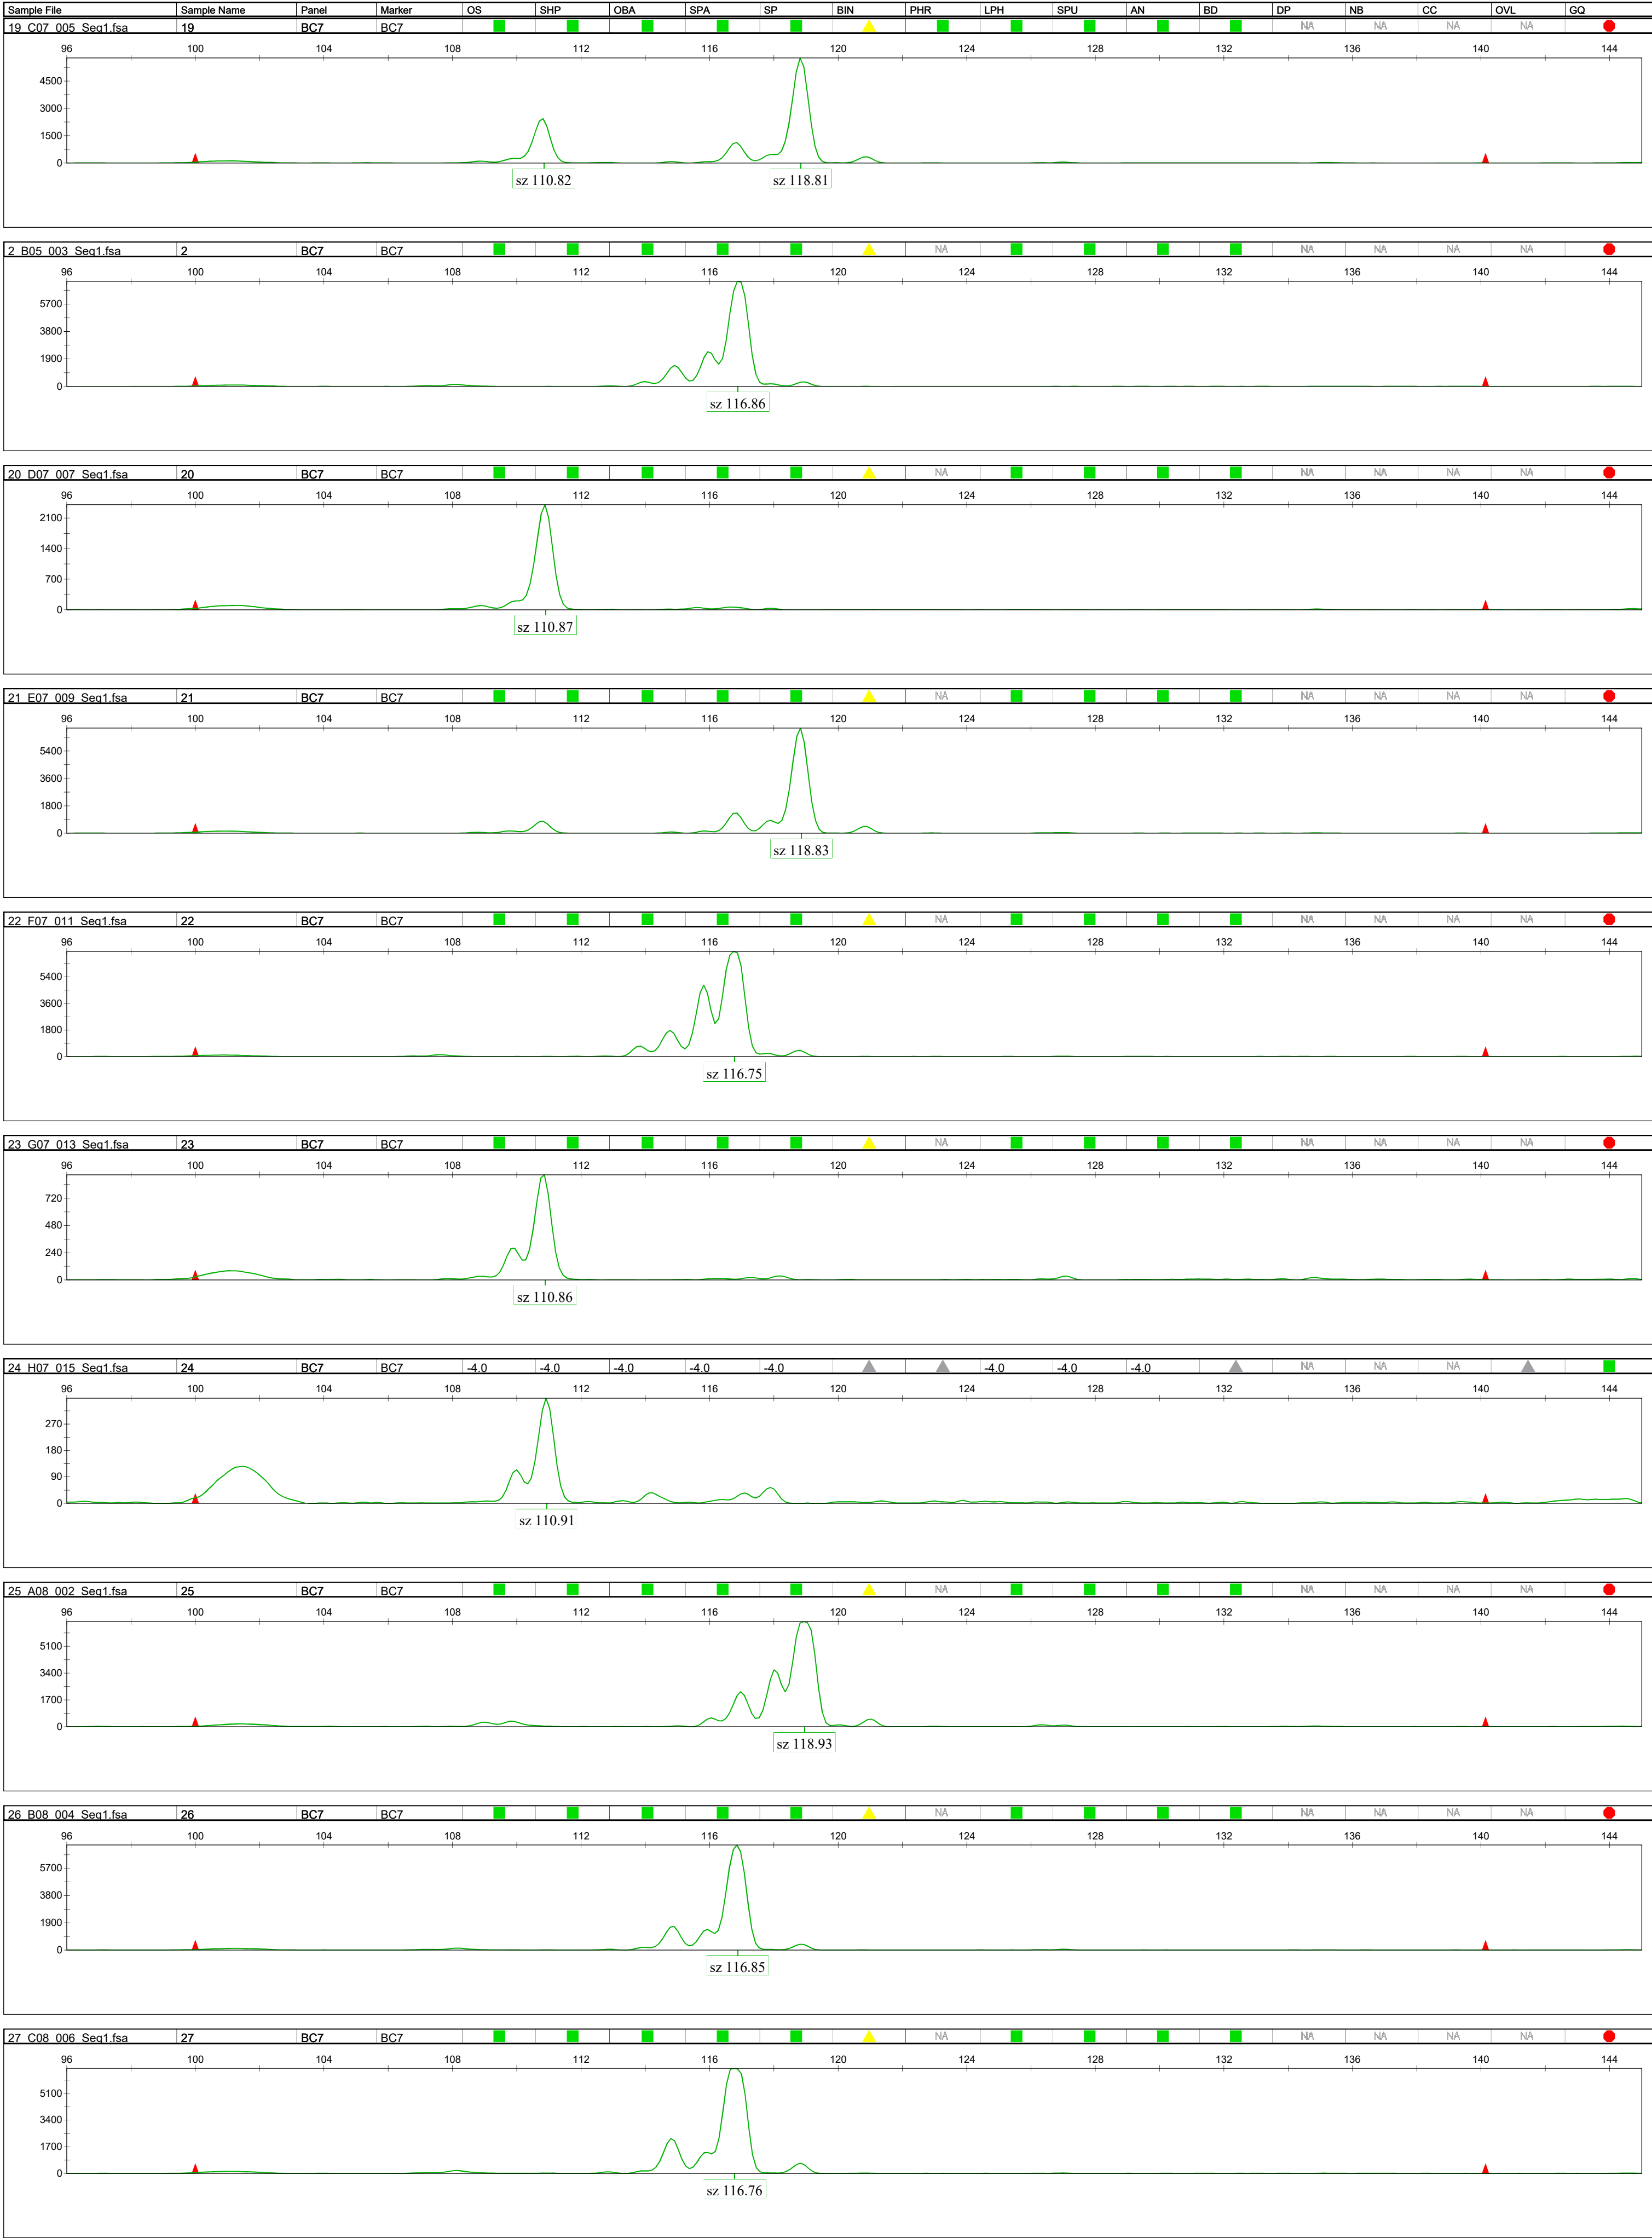

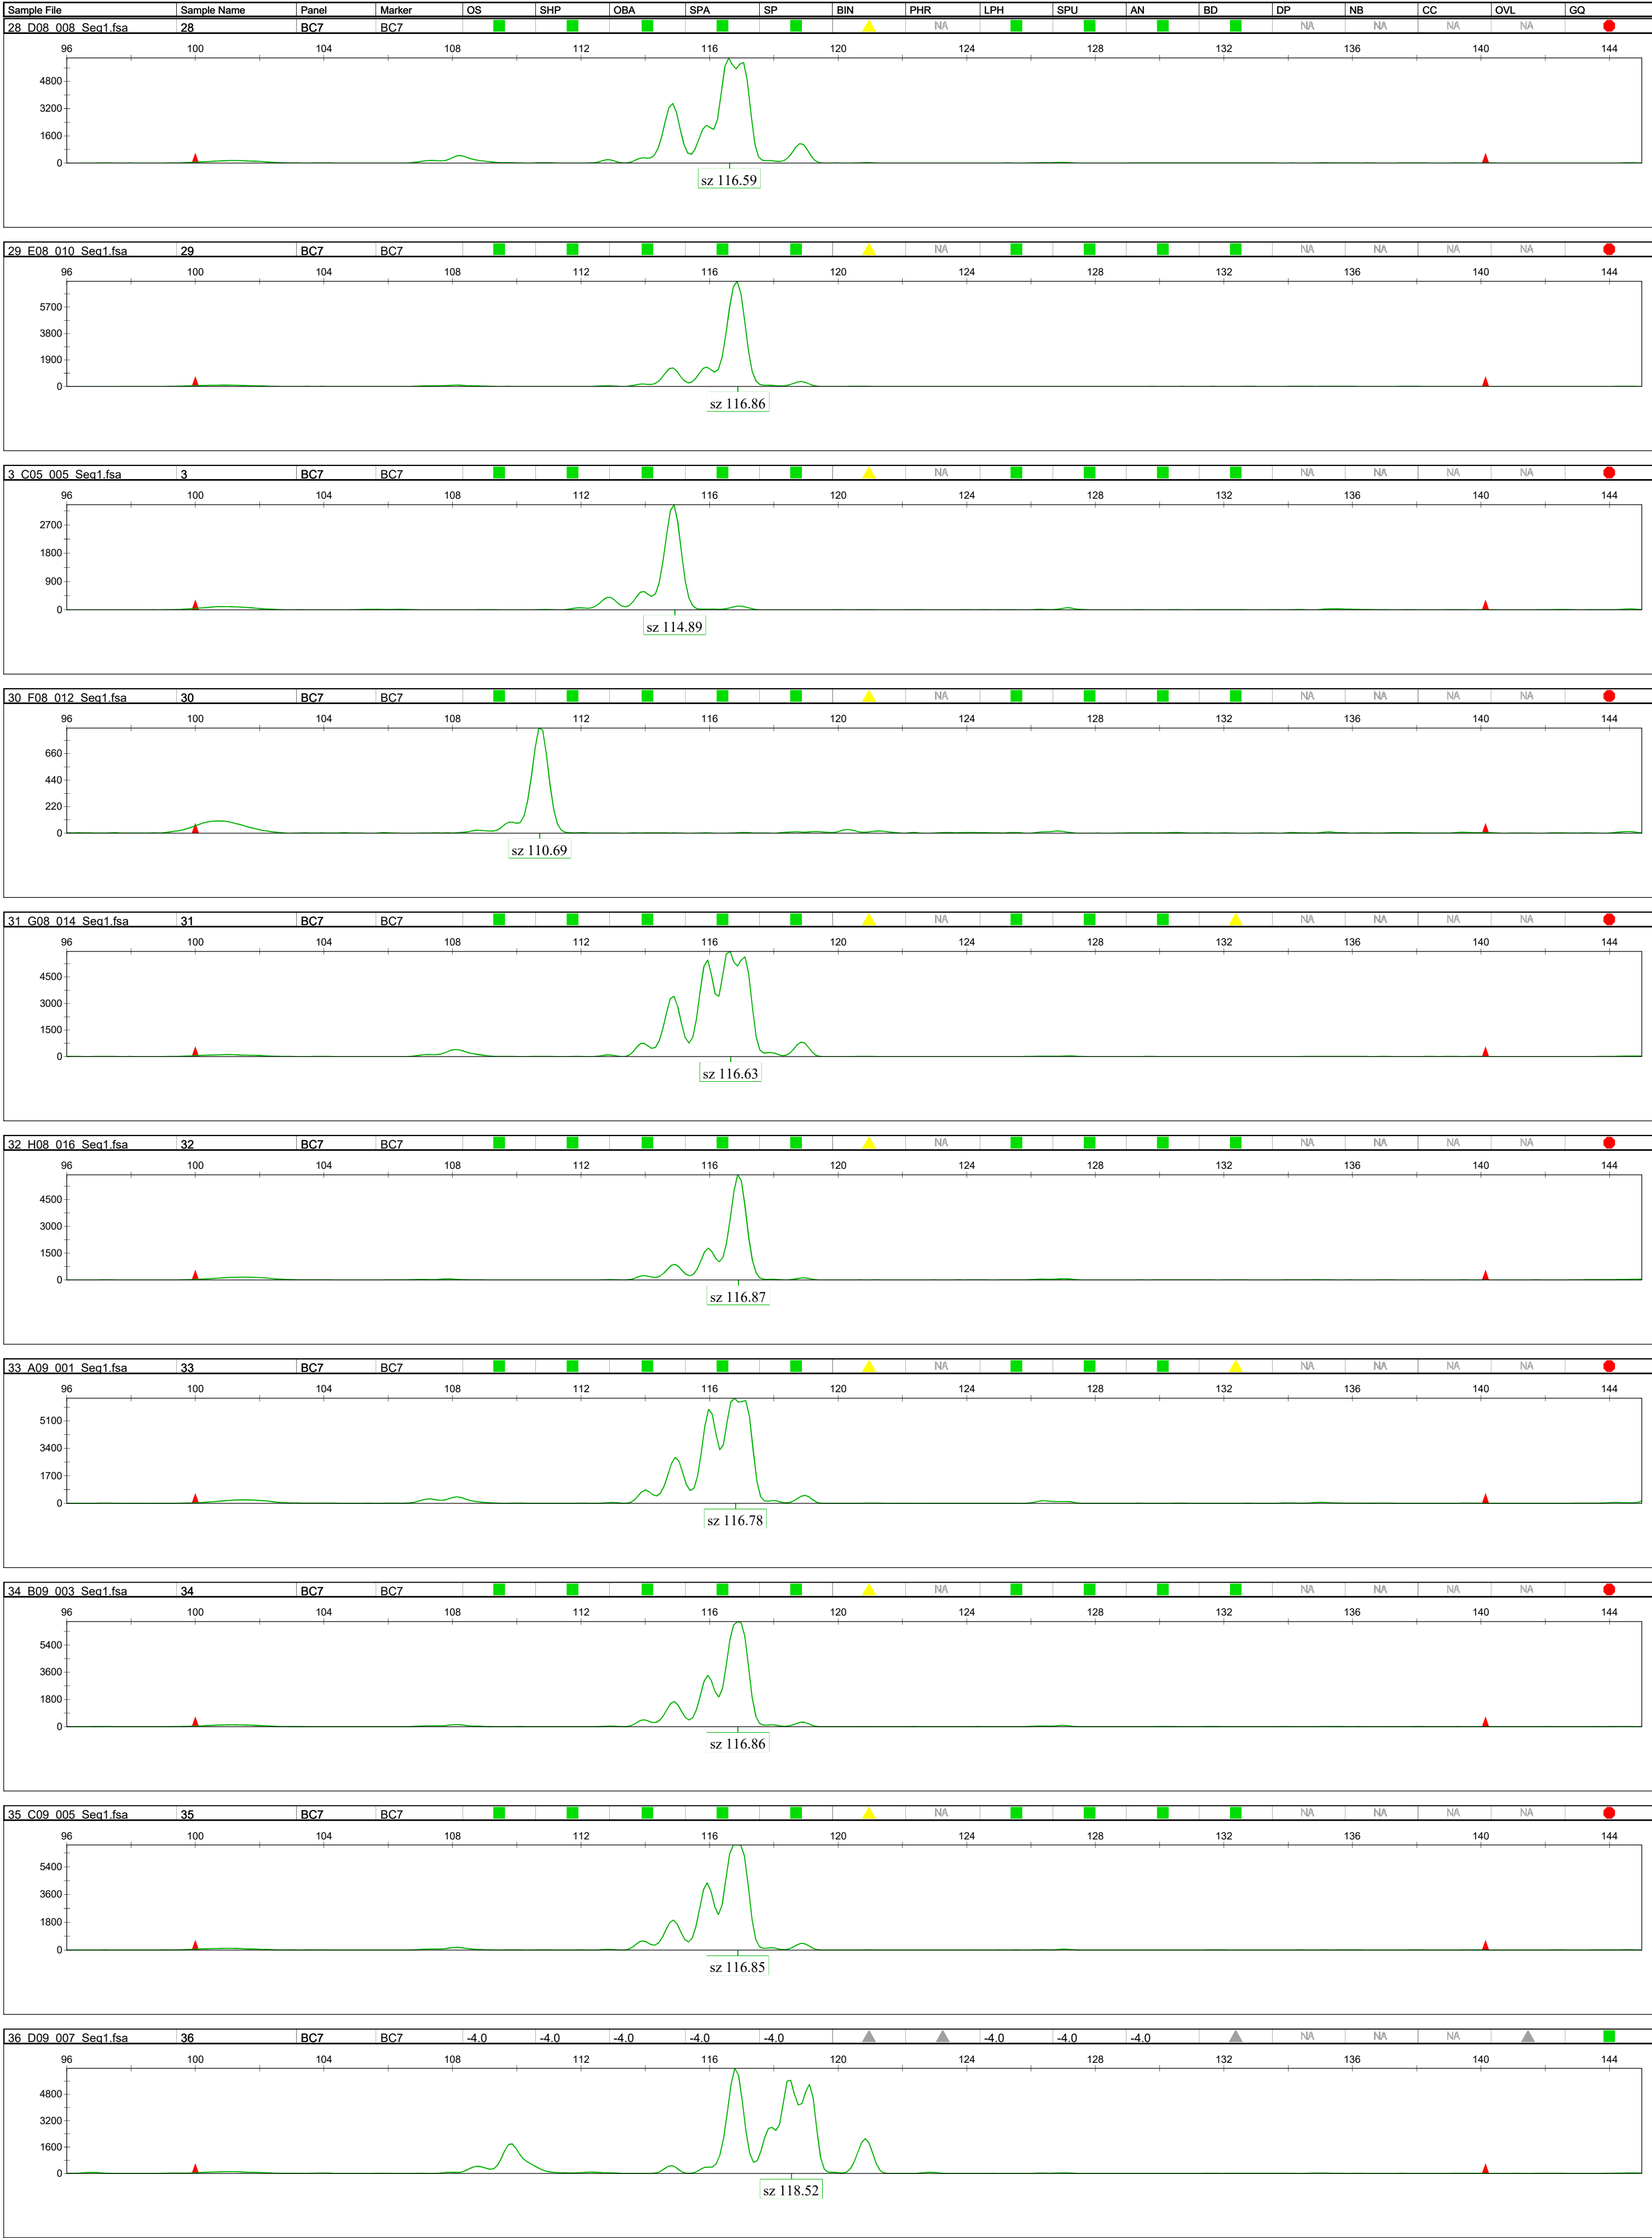

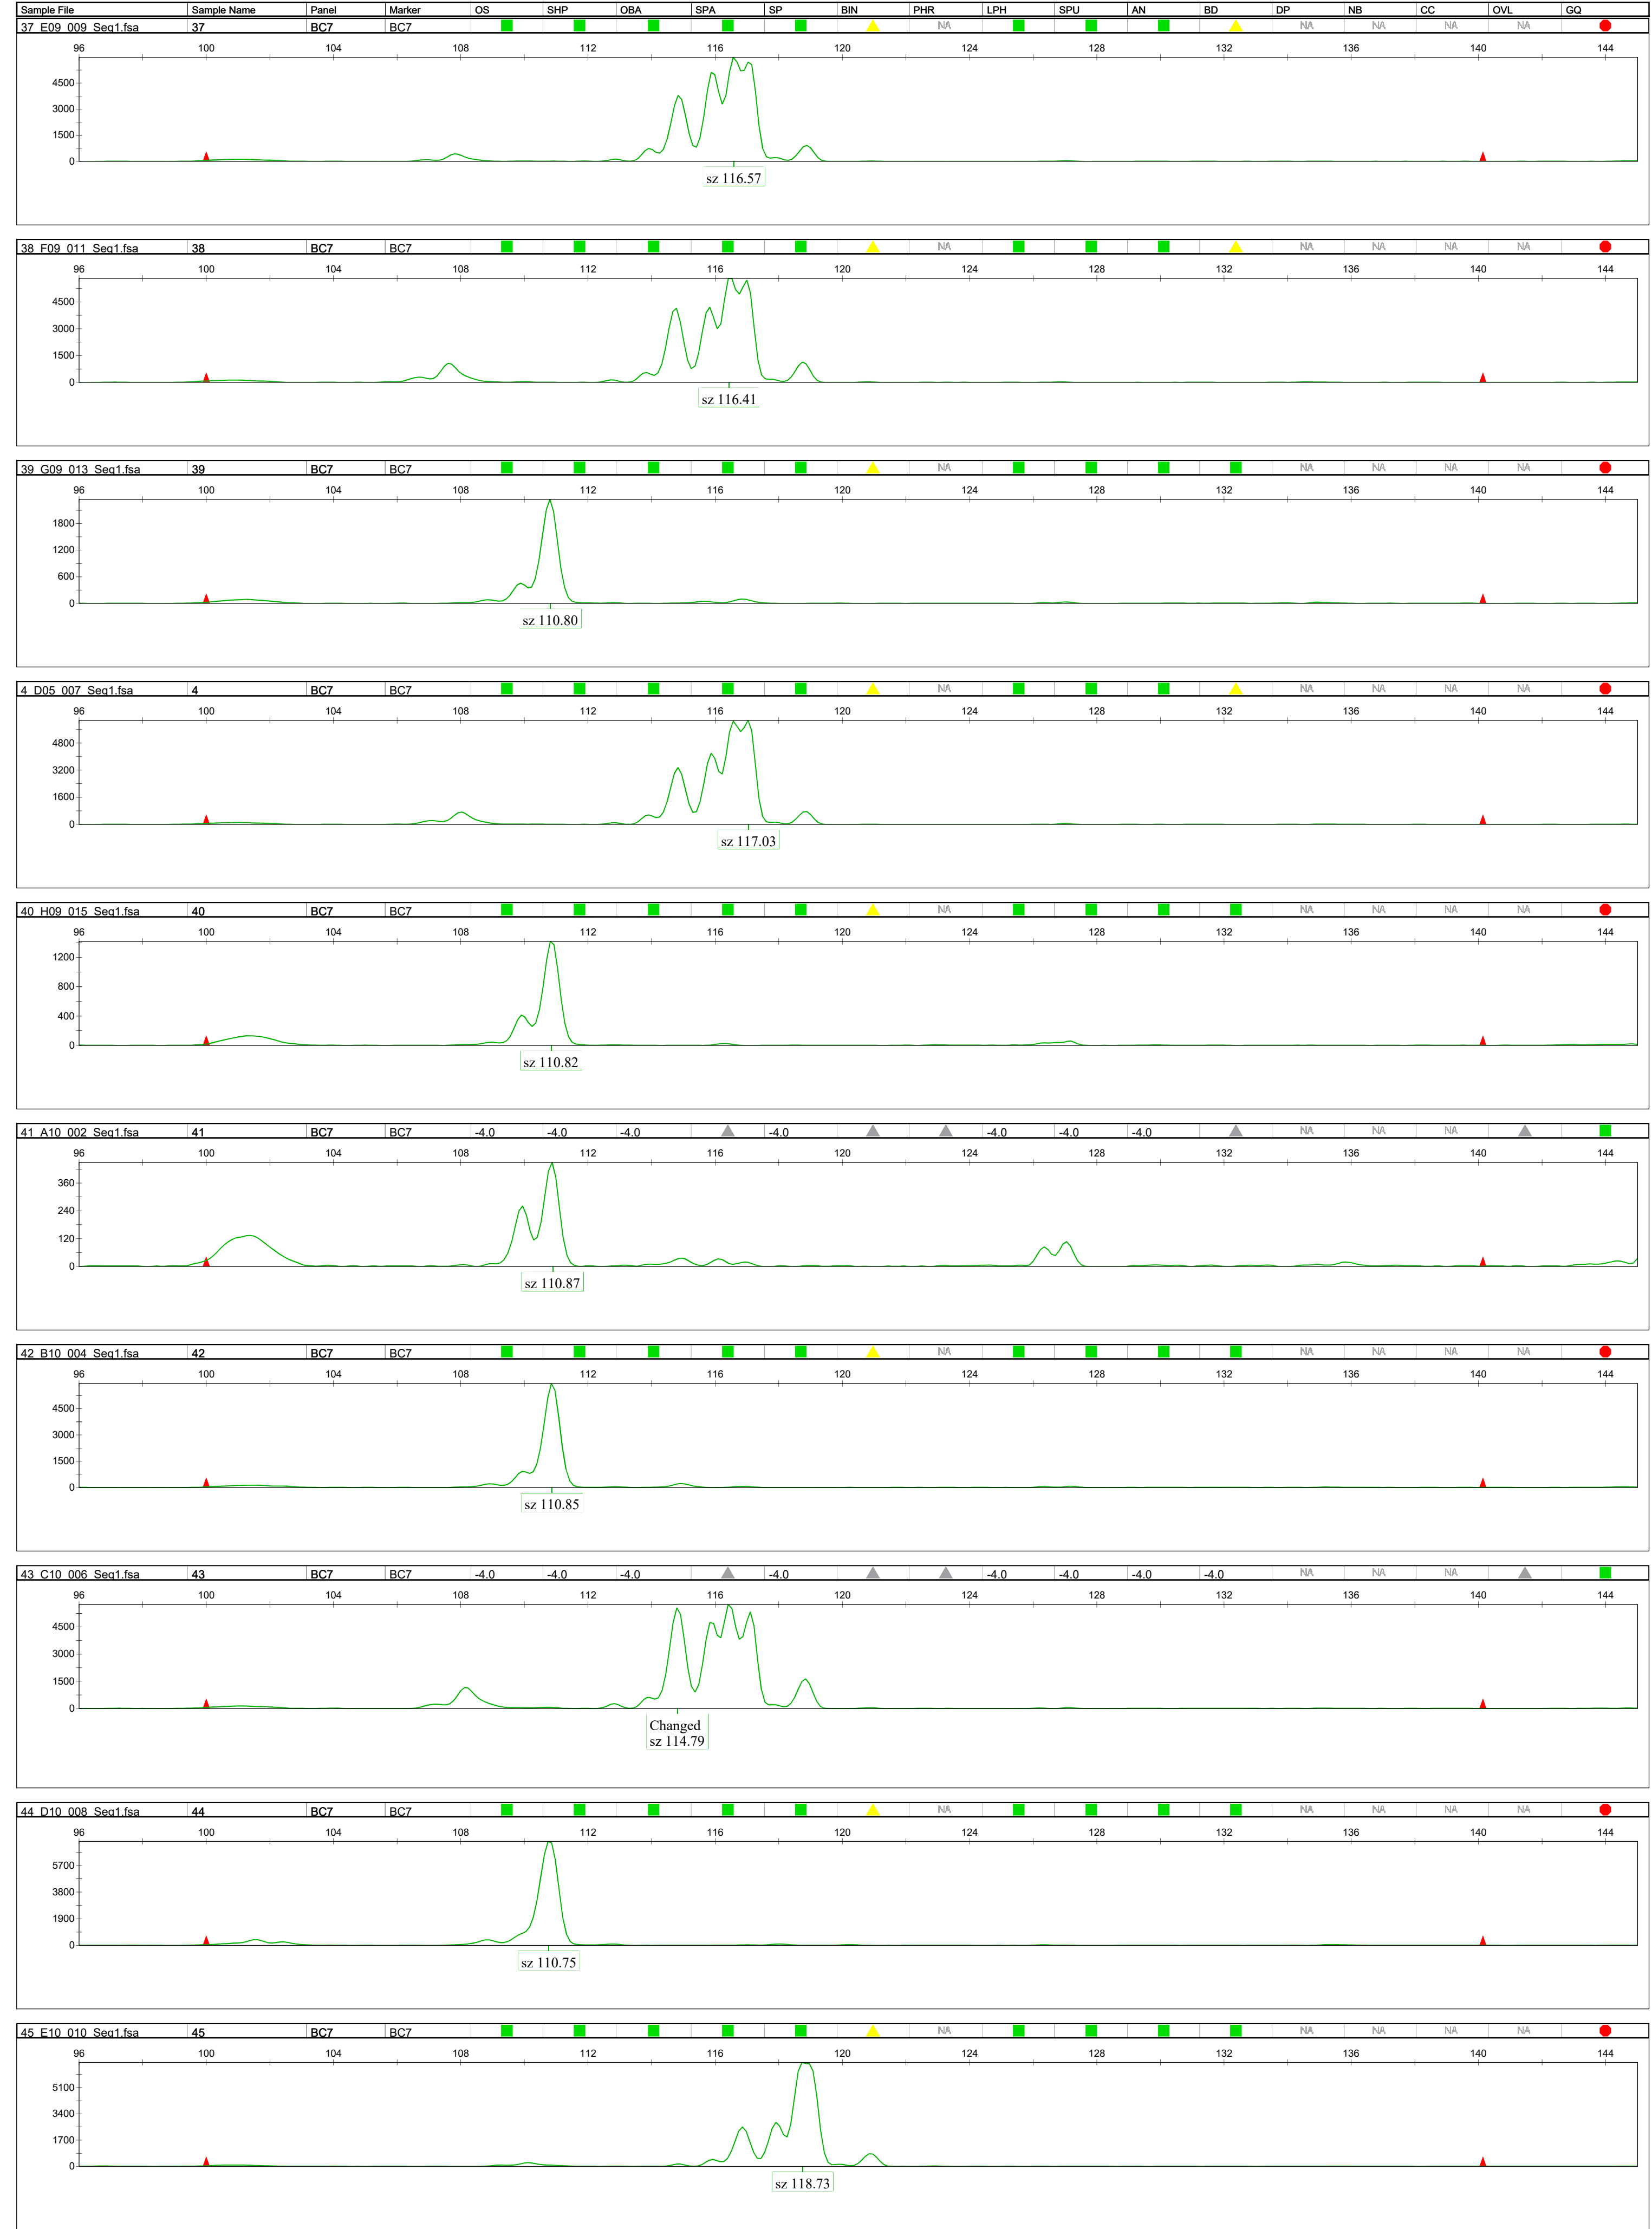

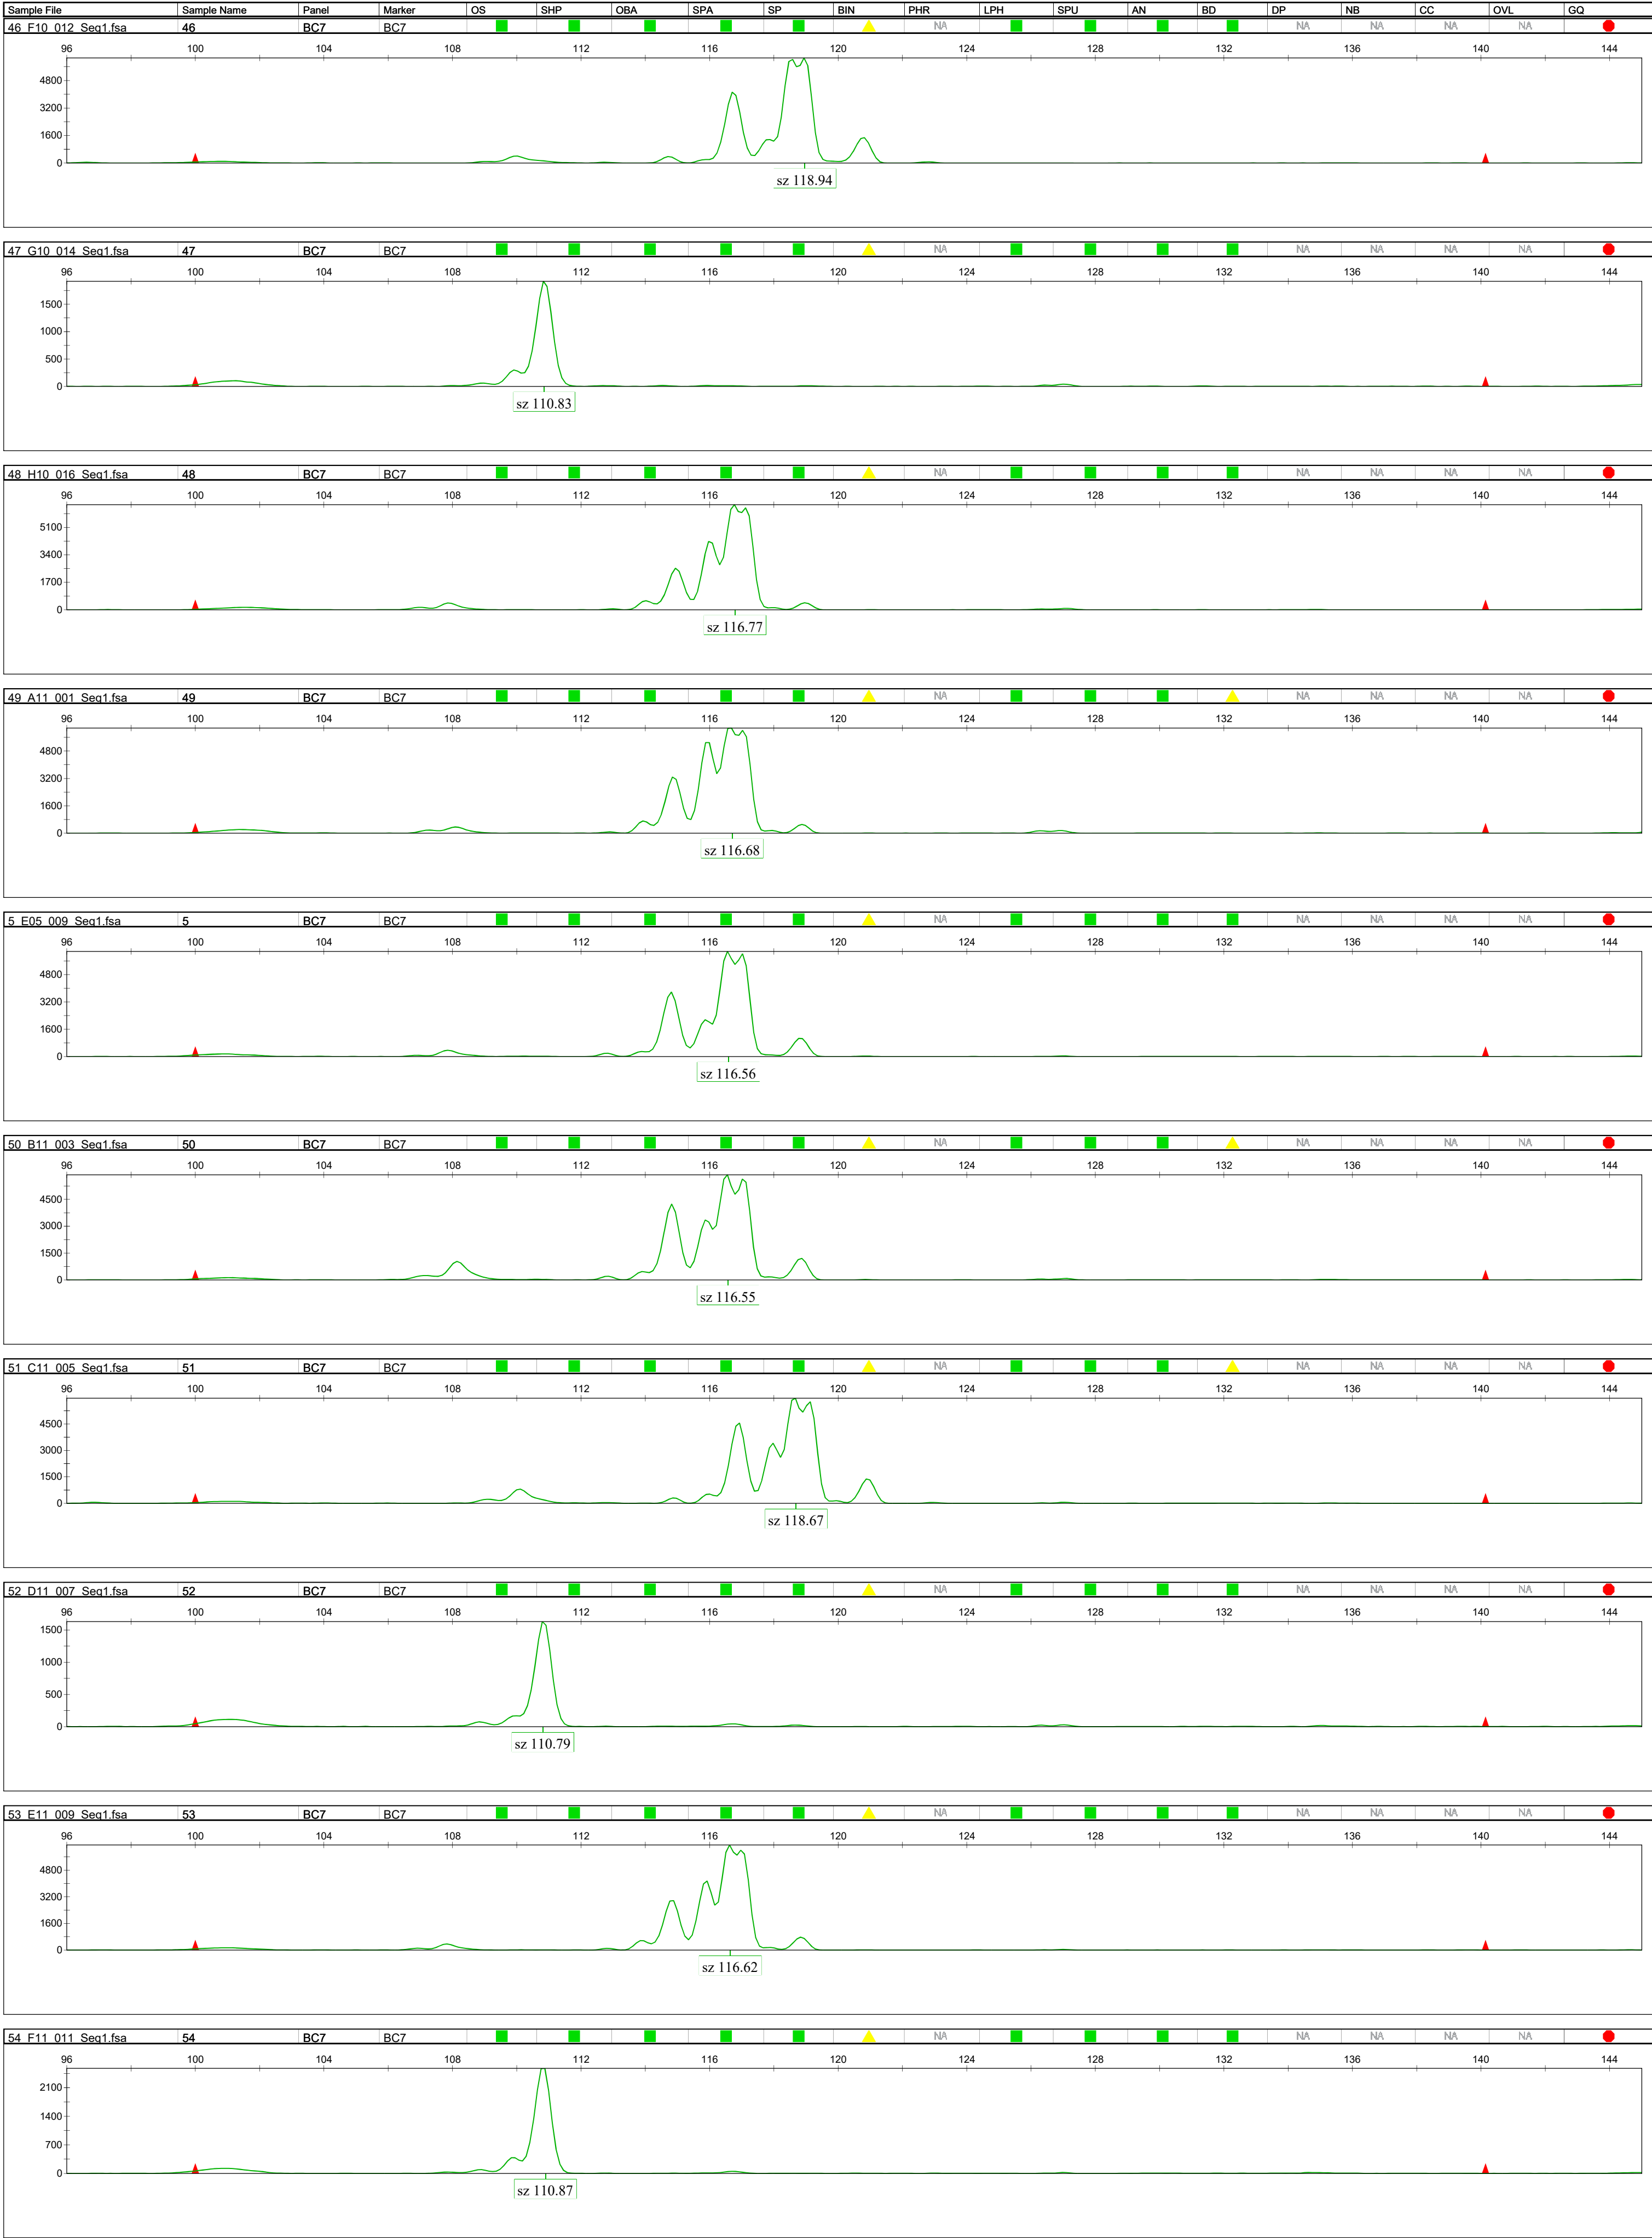

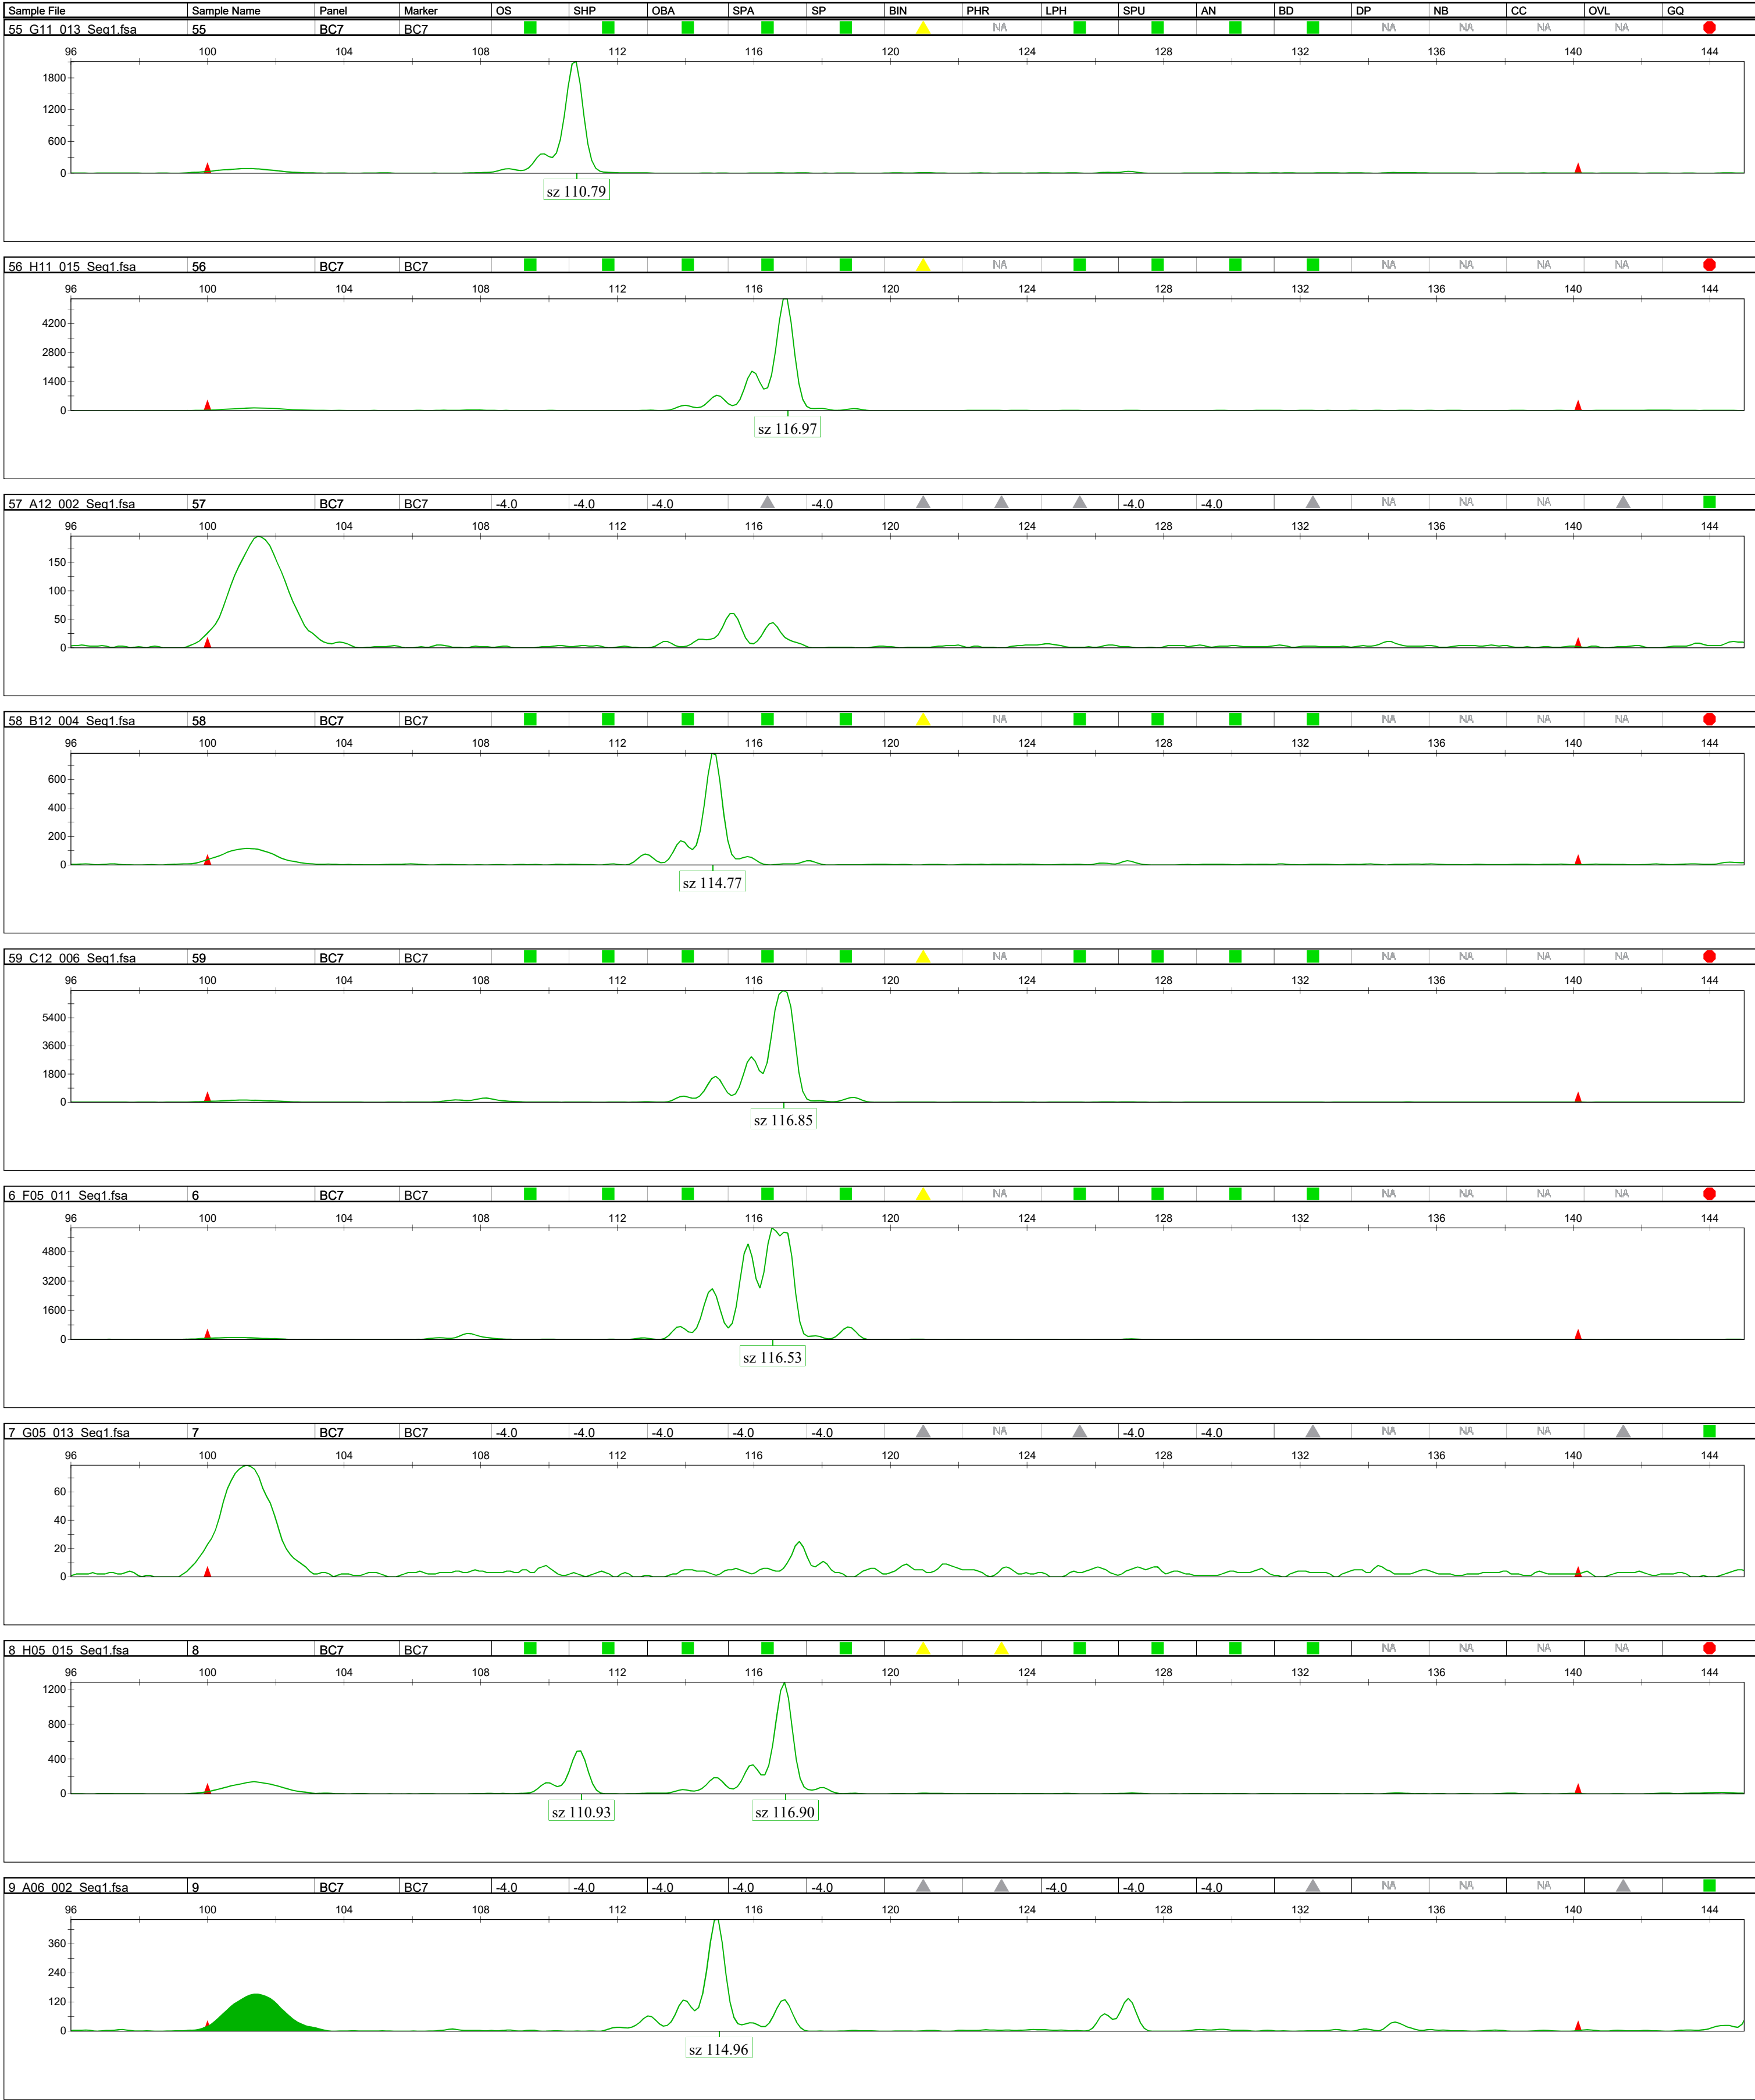

Supplement: s1 [file s1]

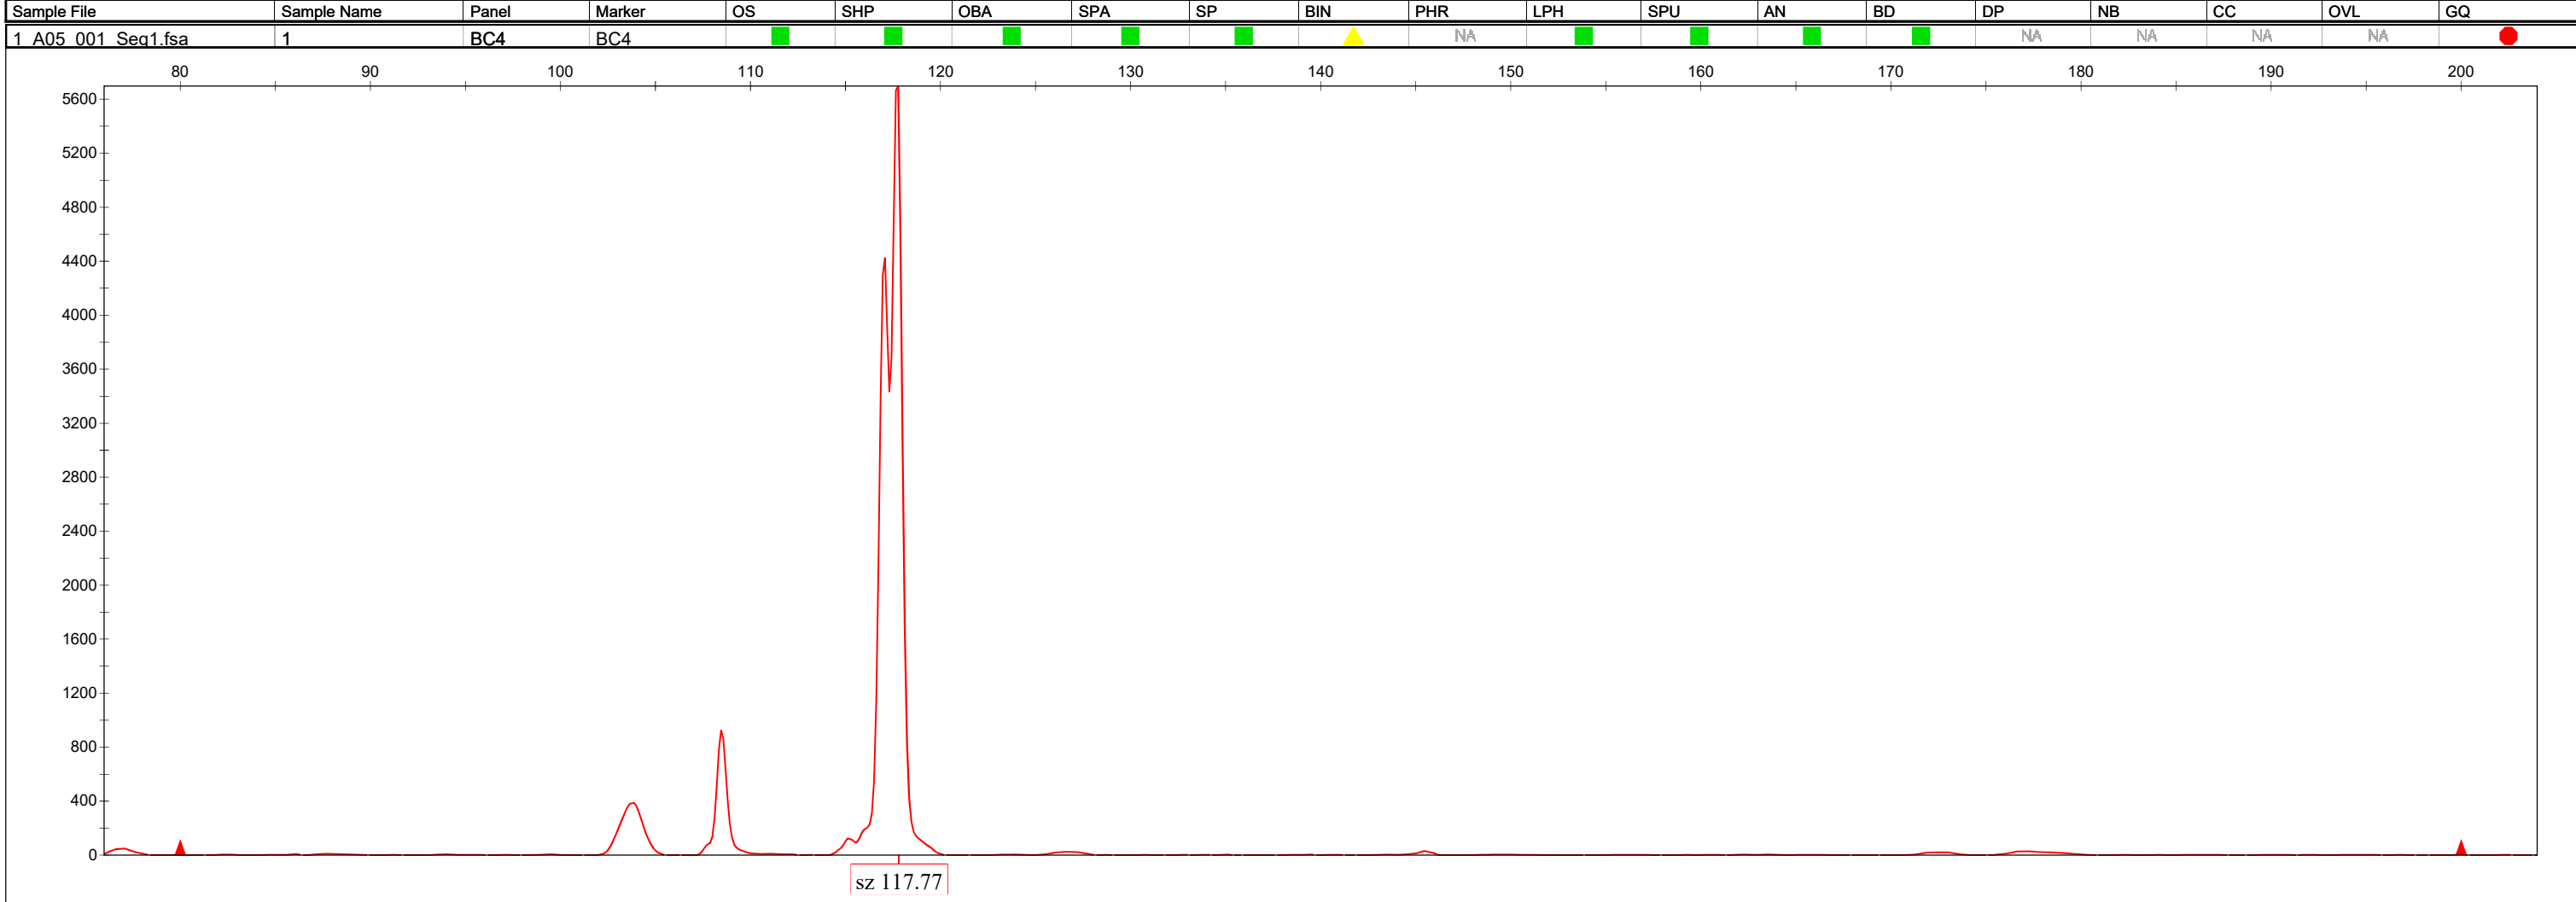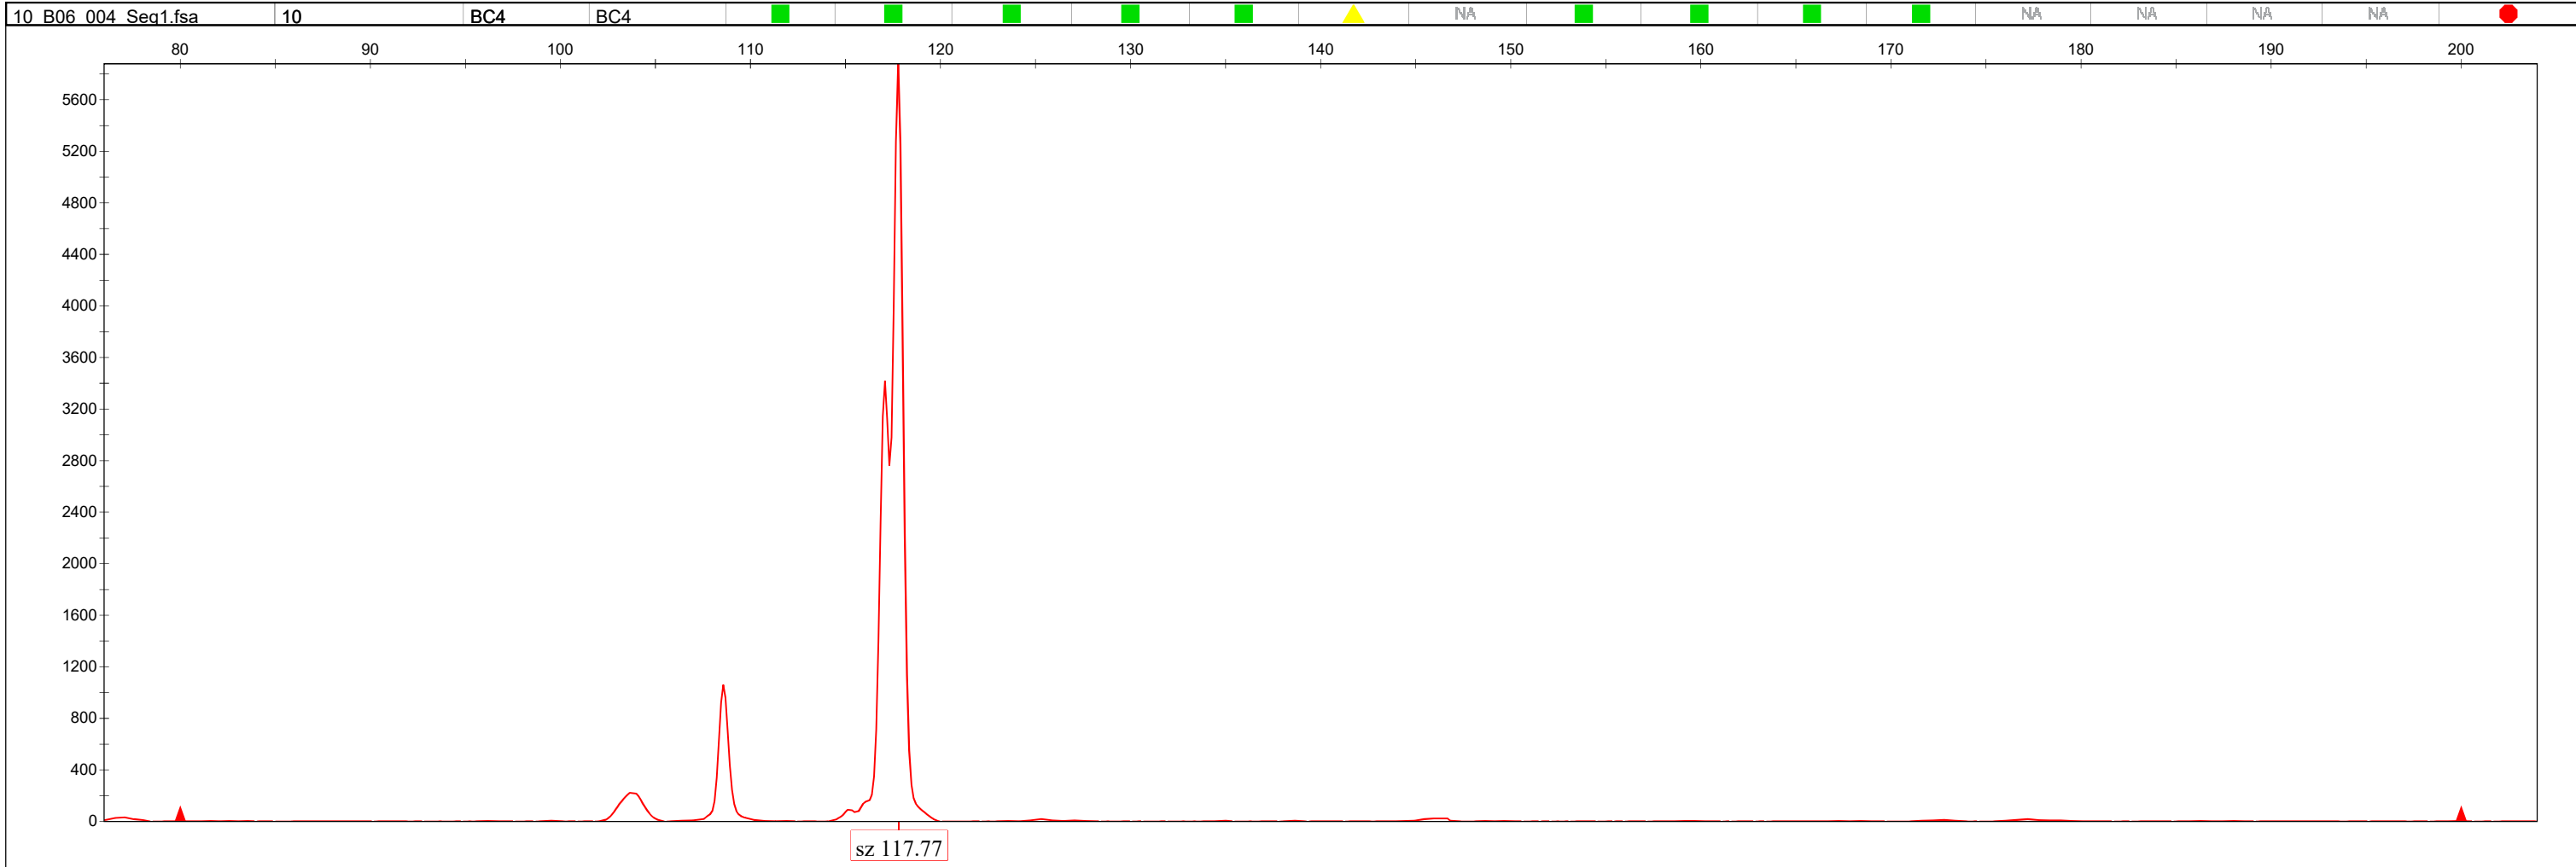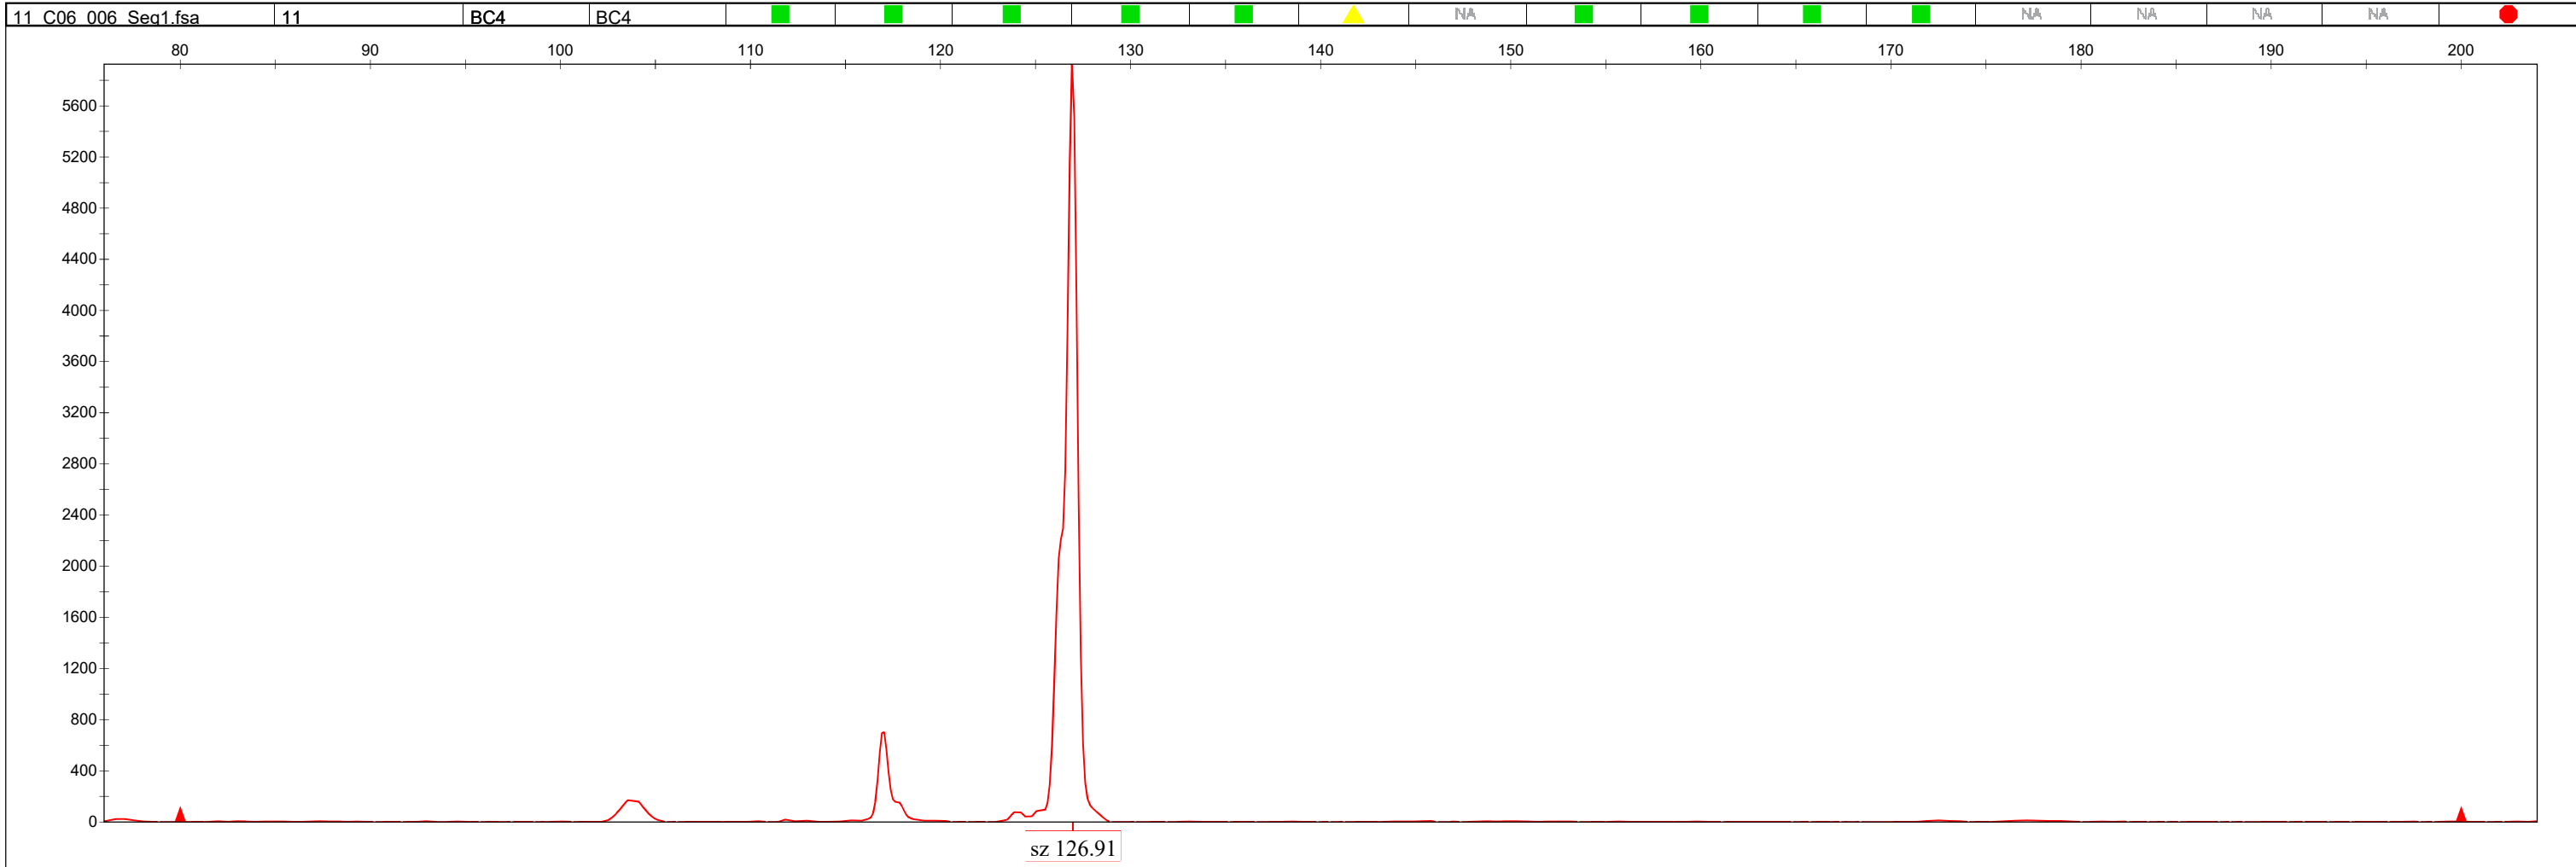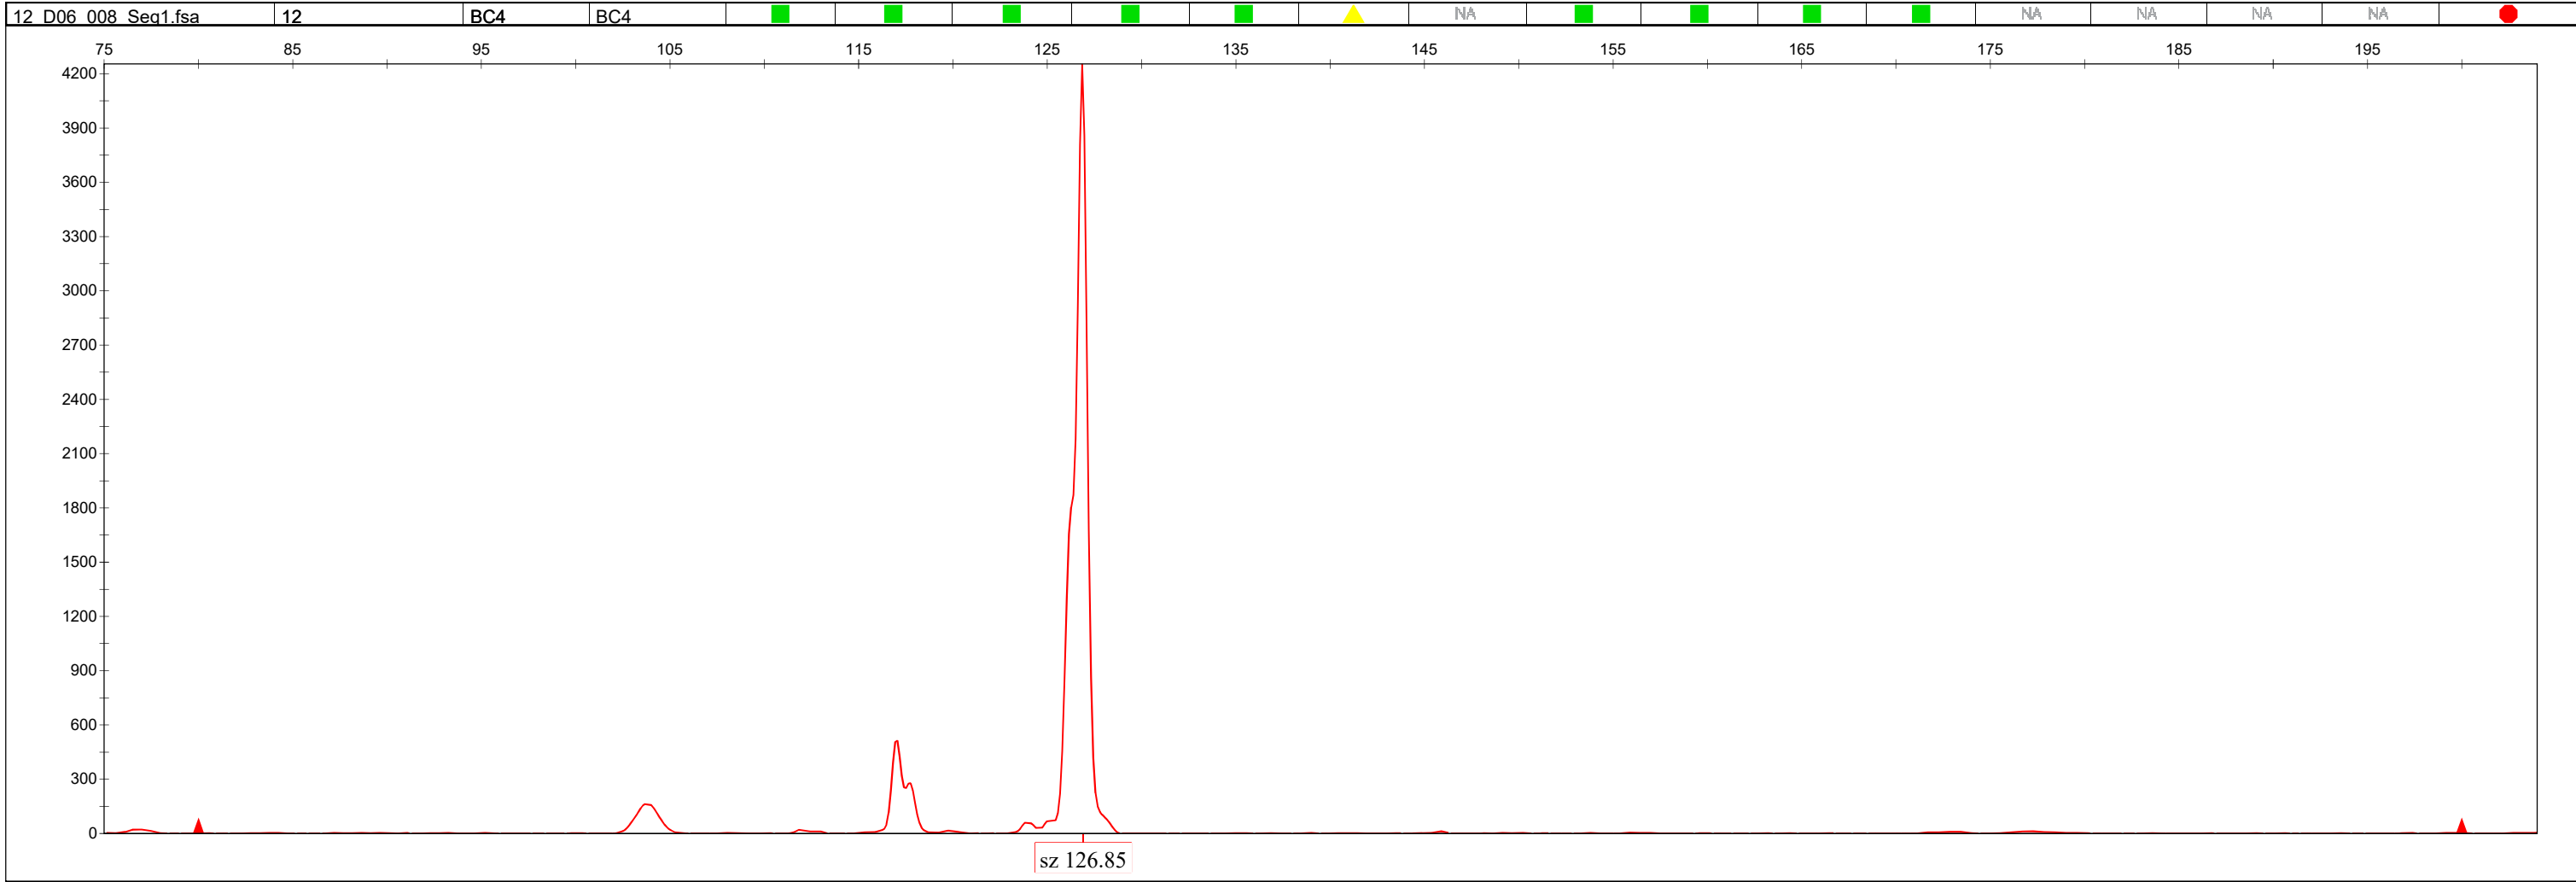

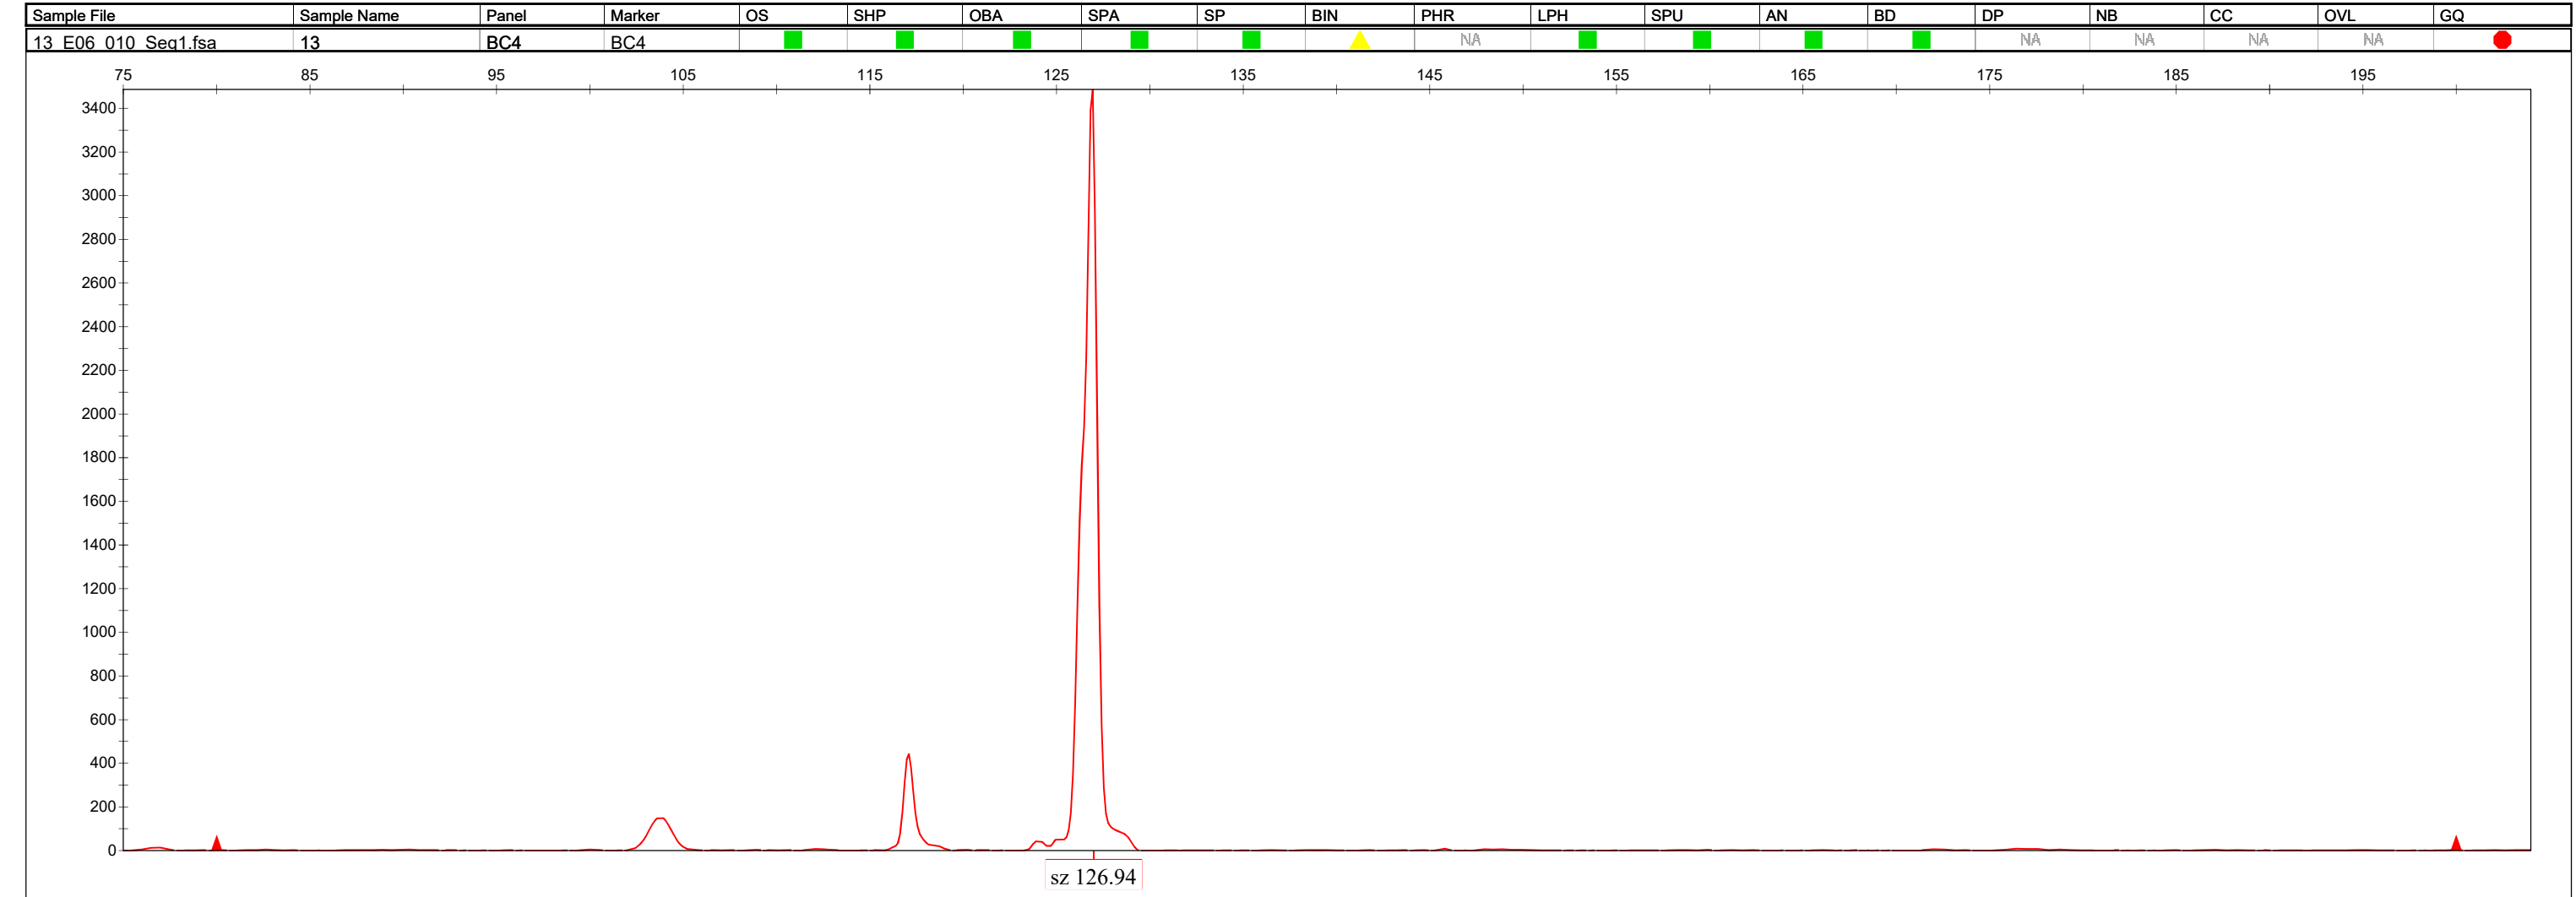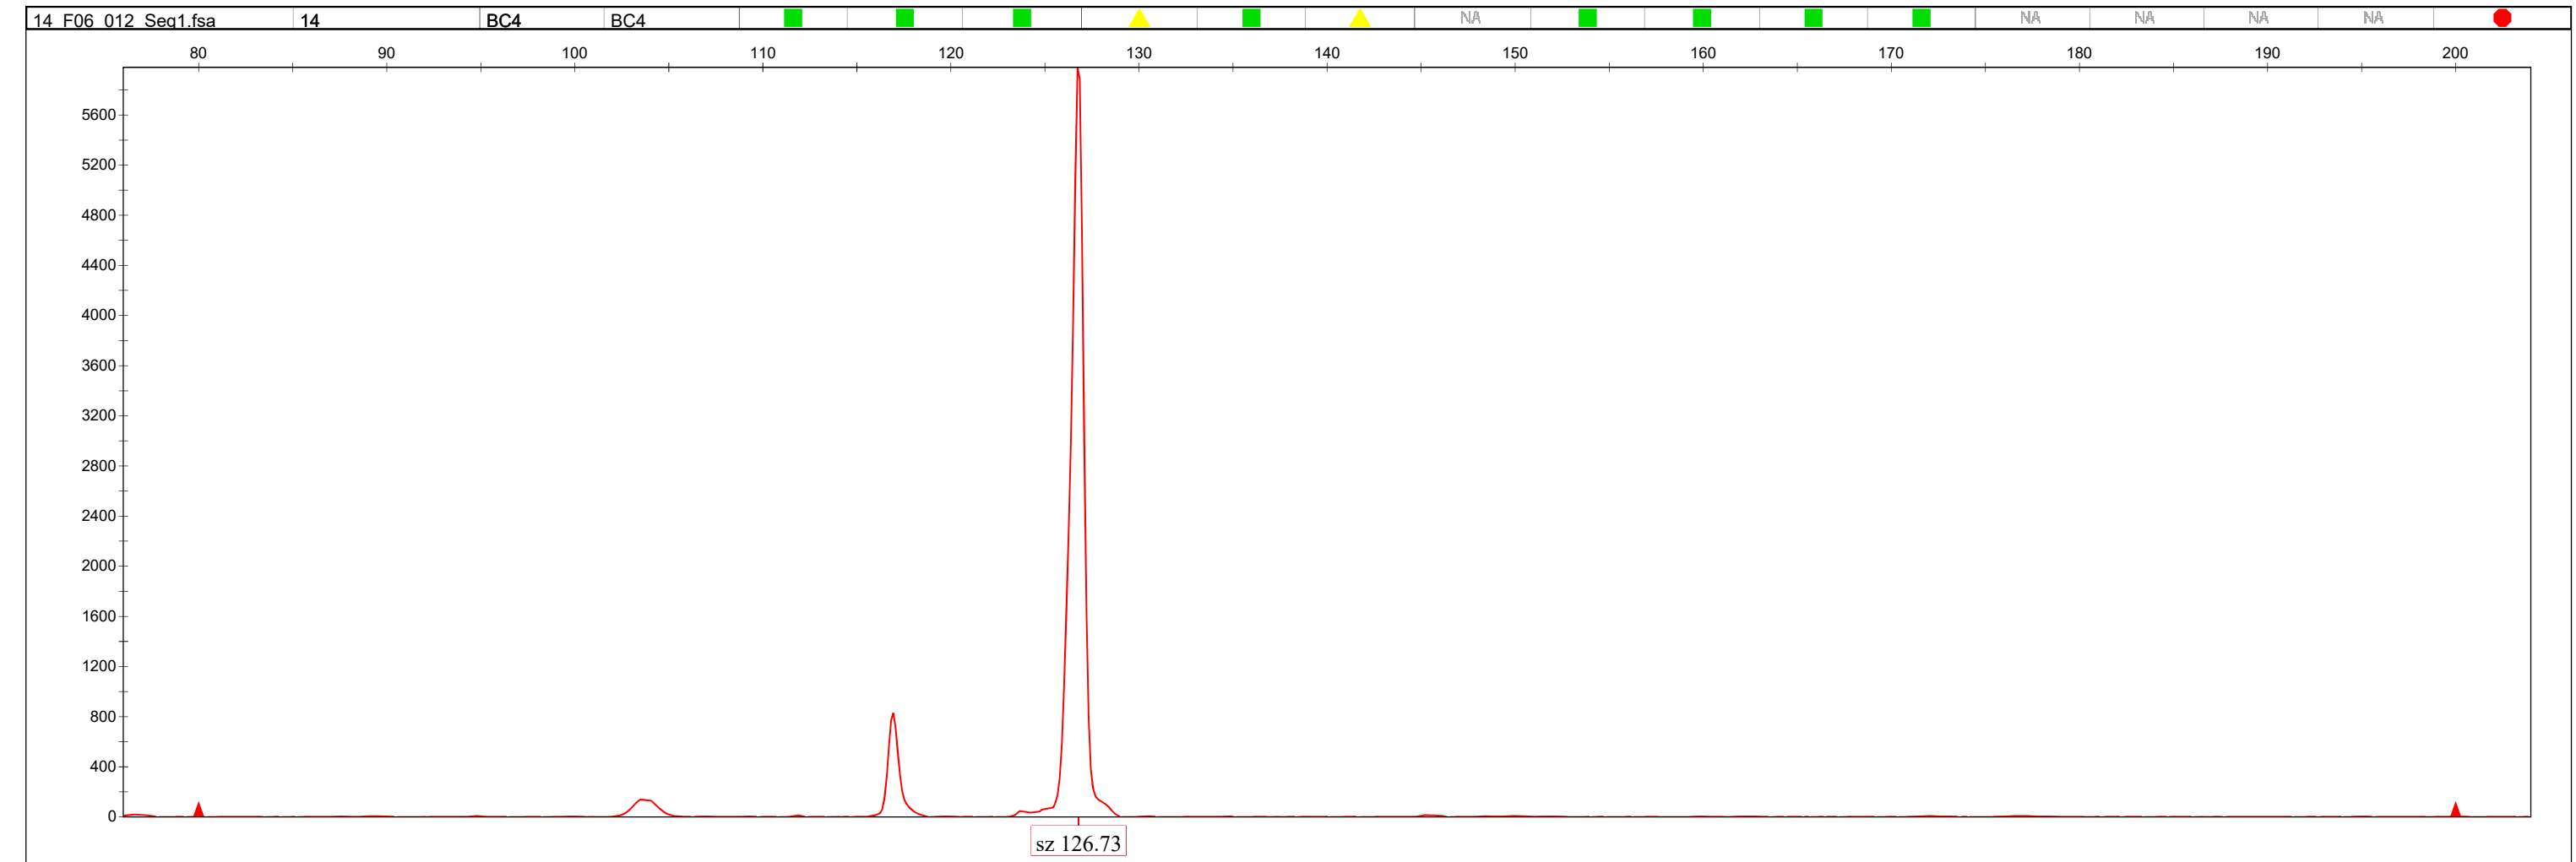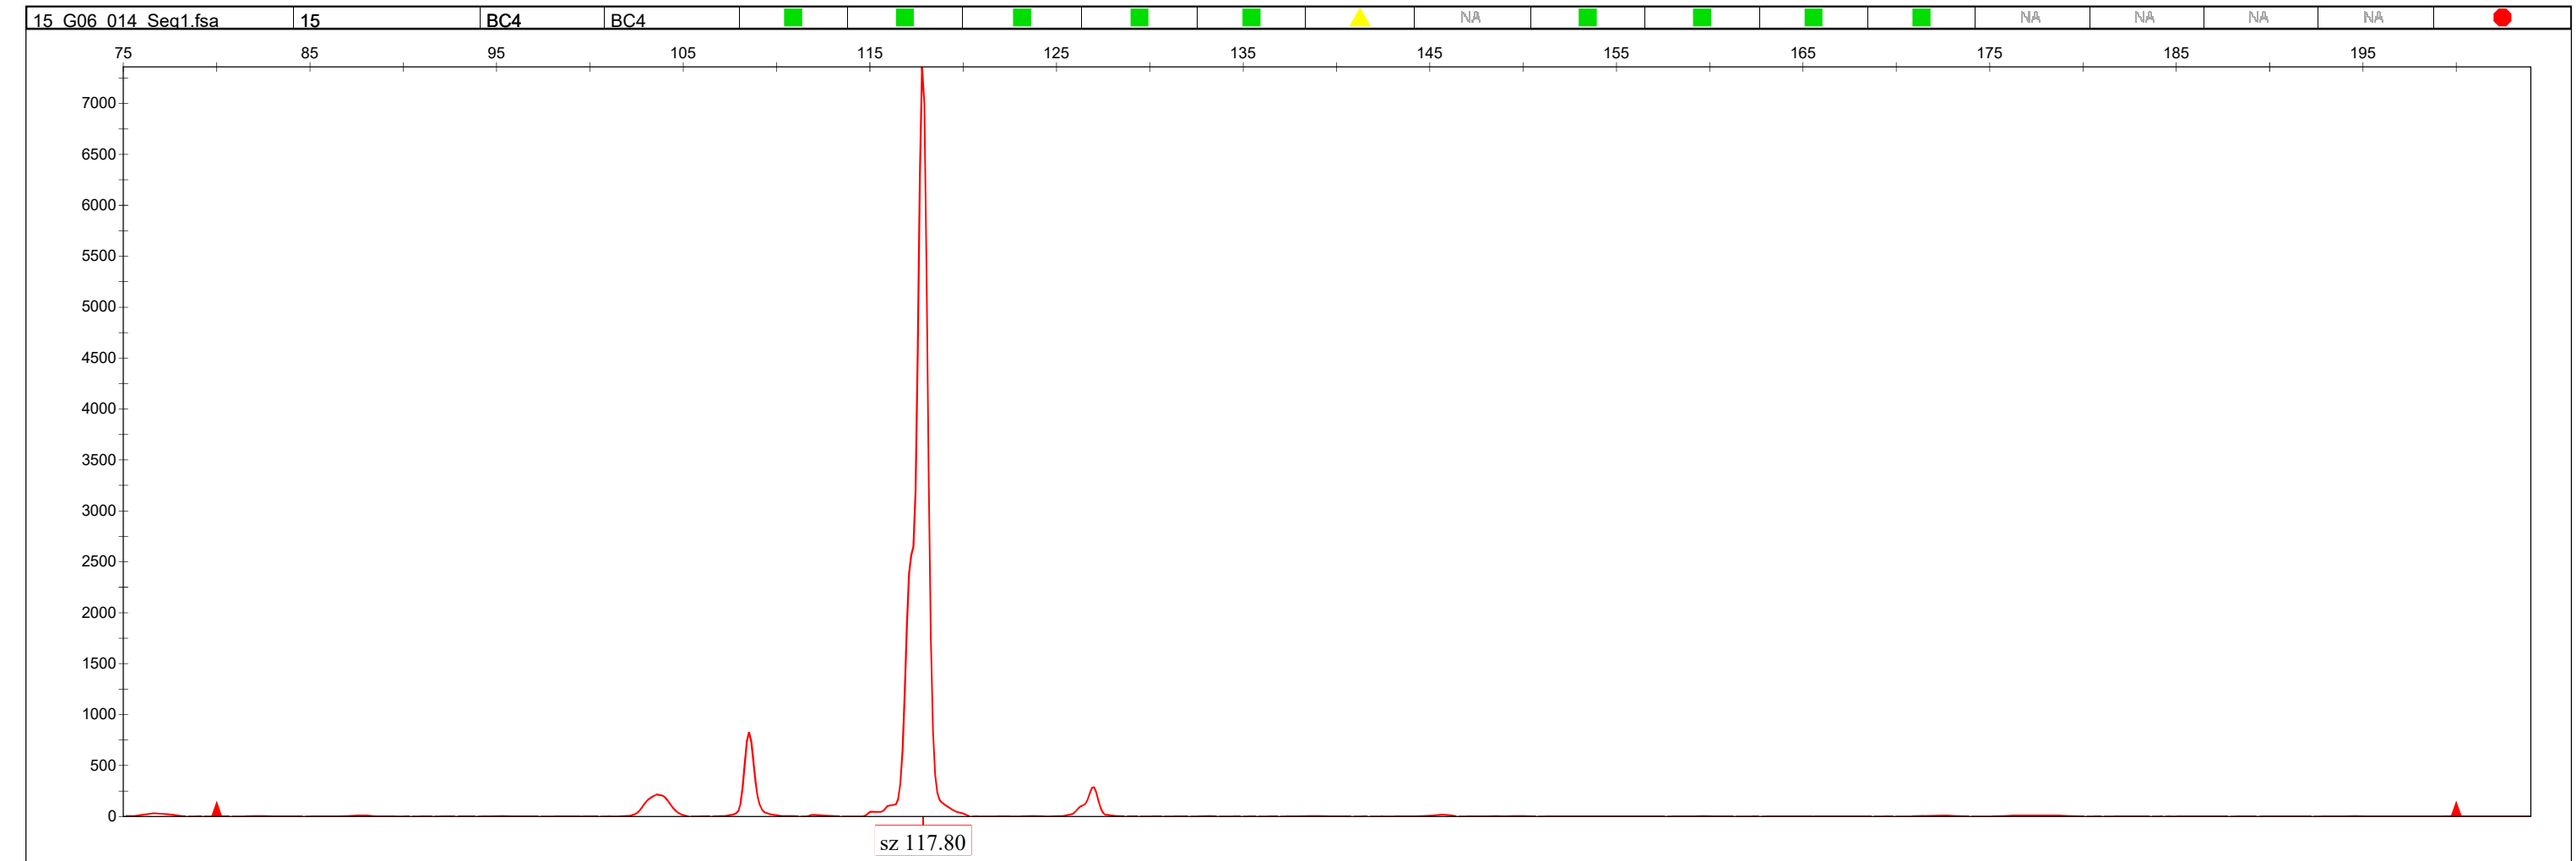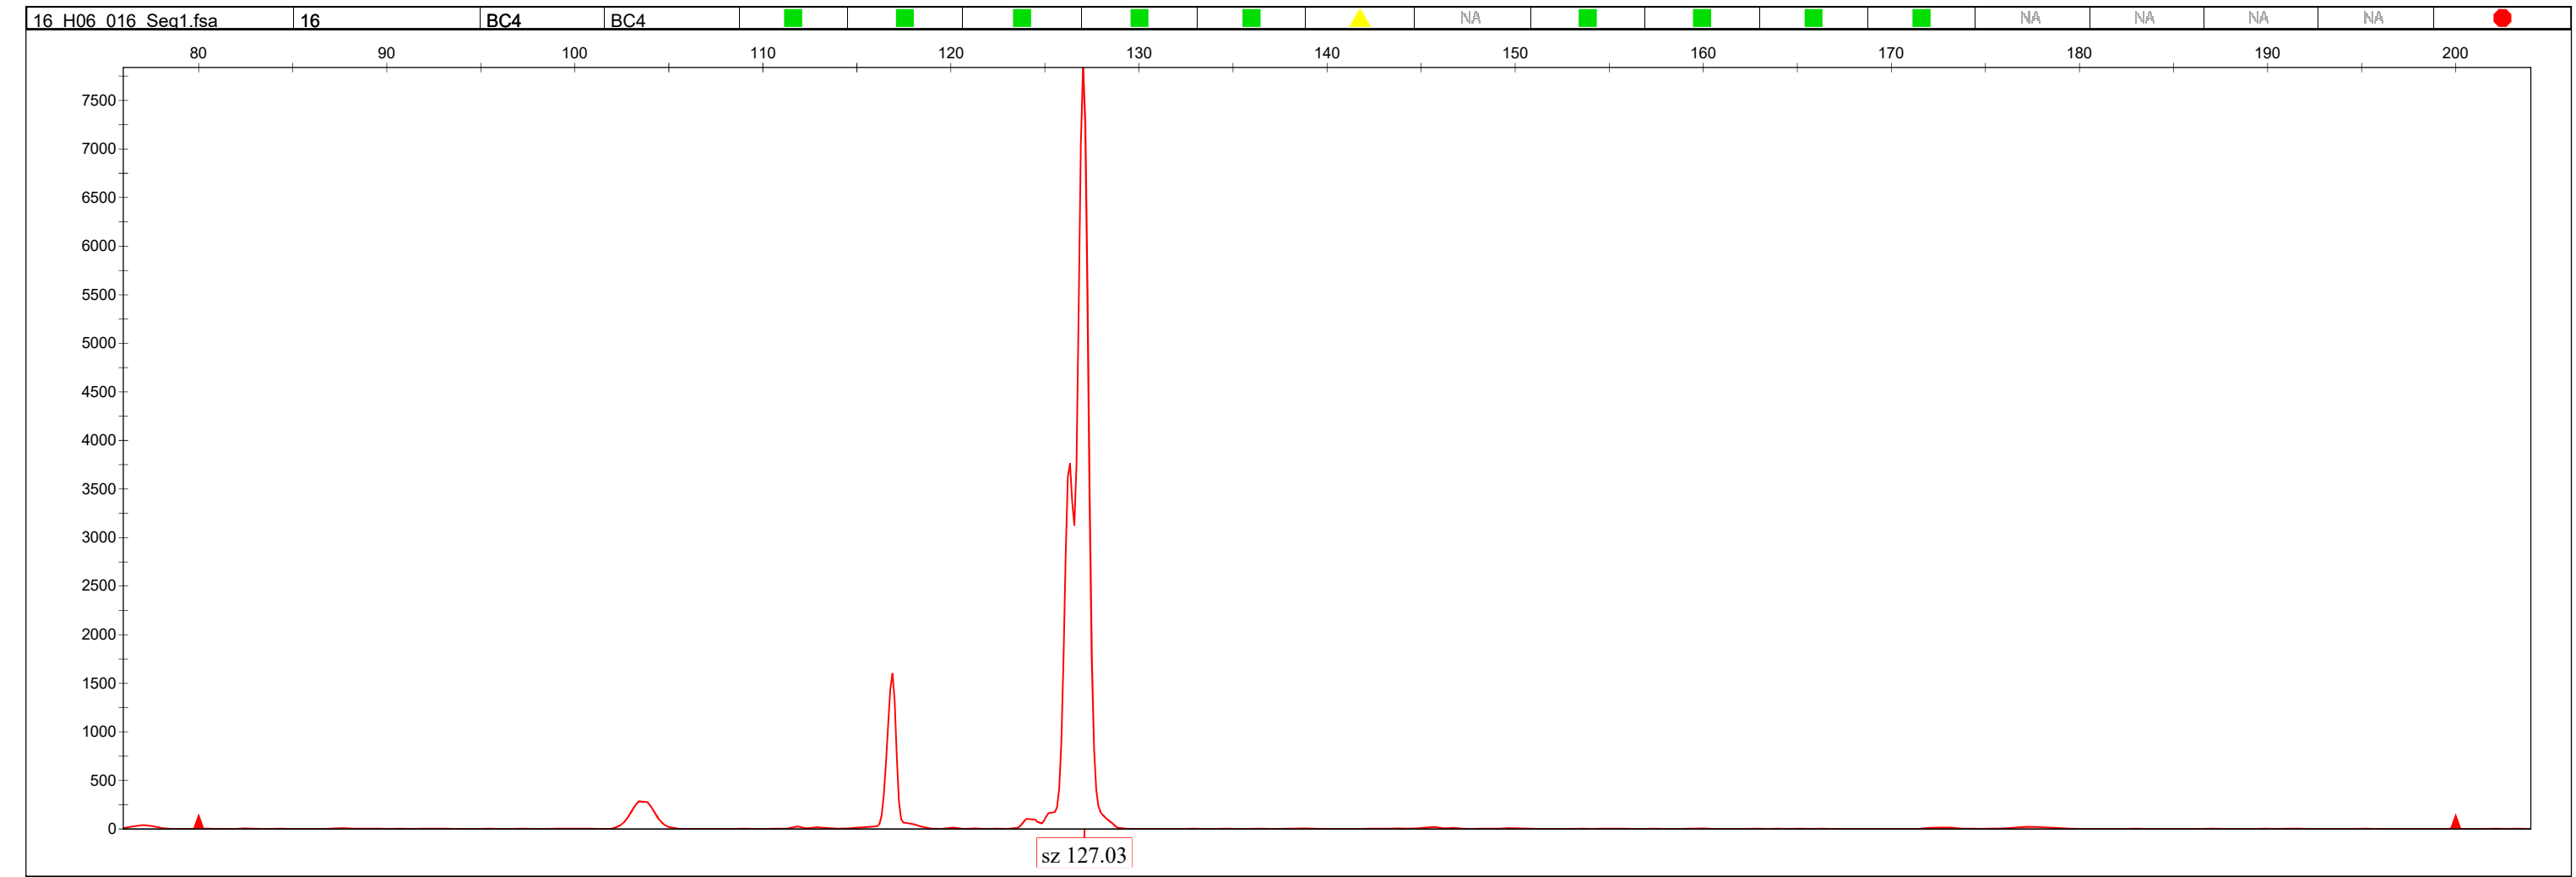

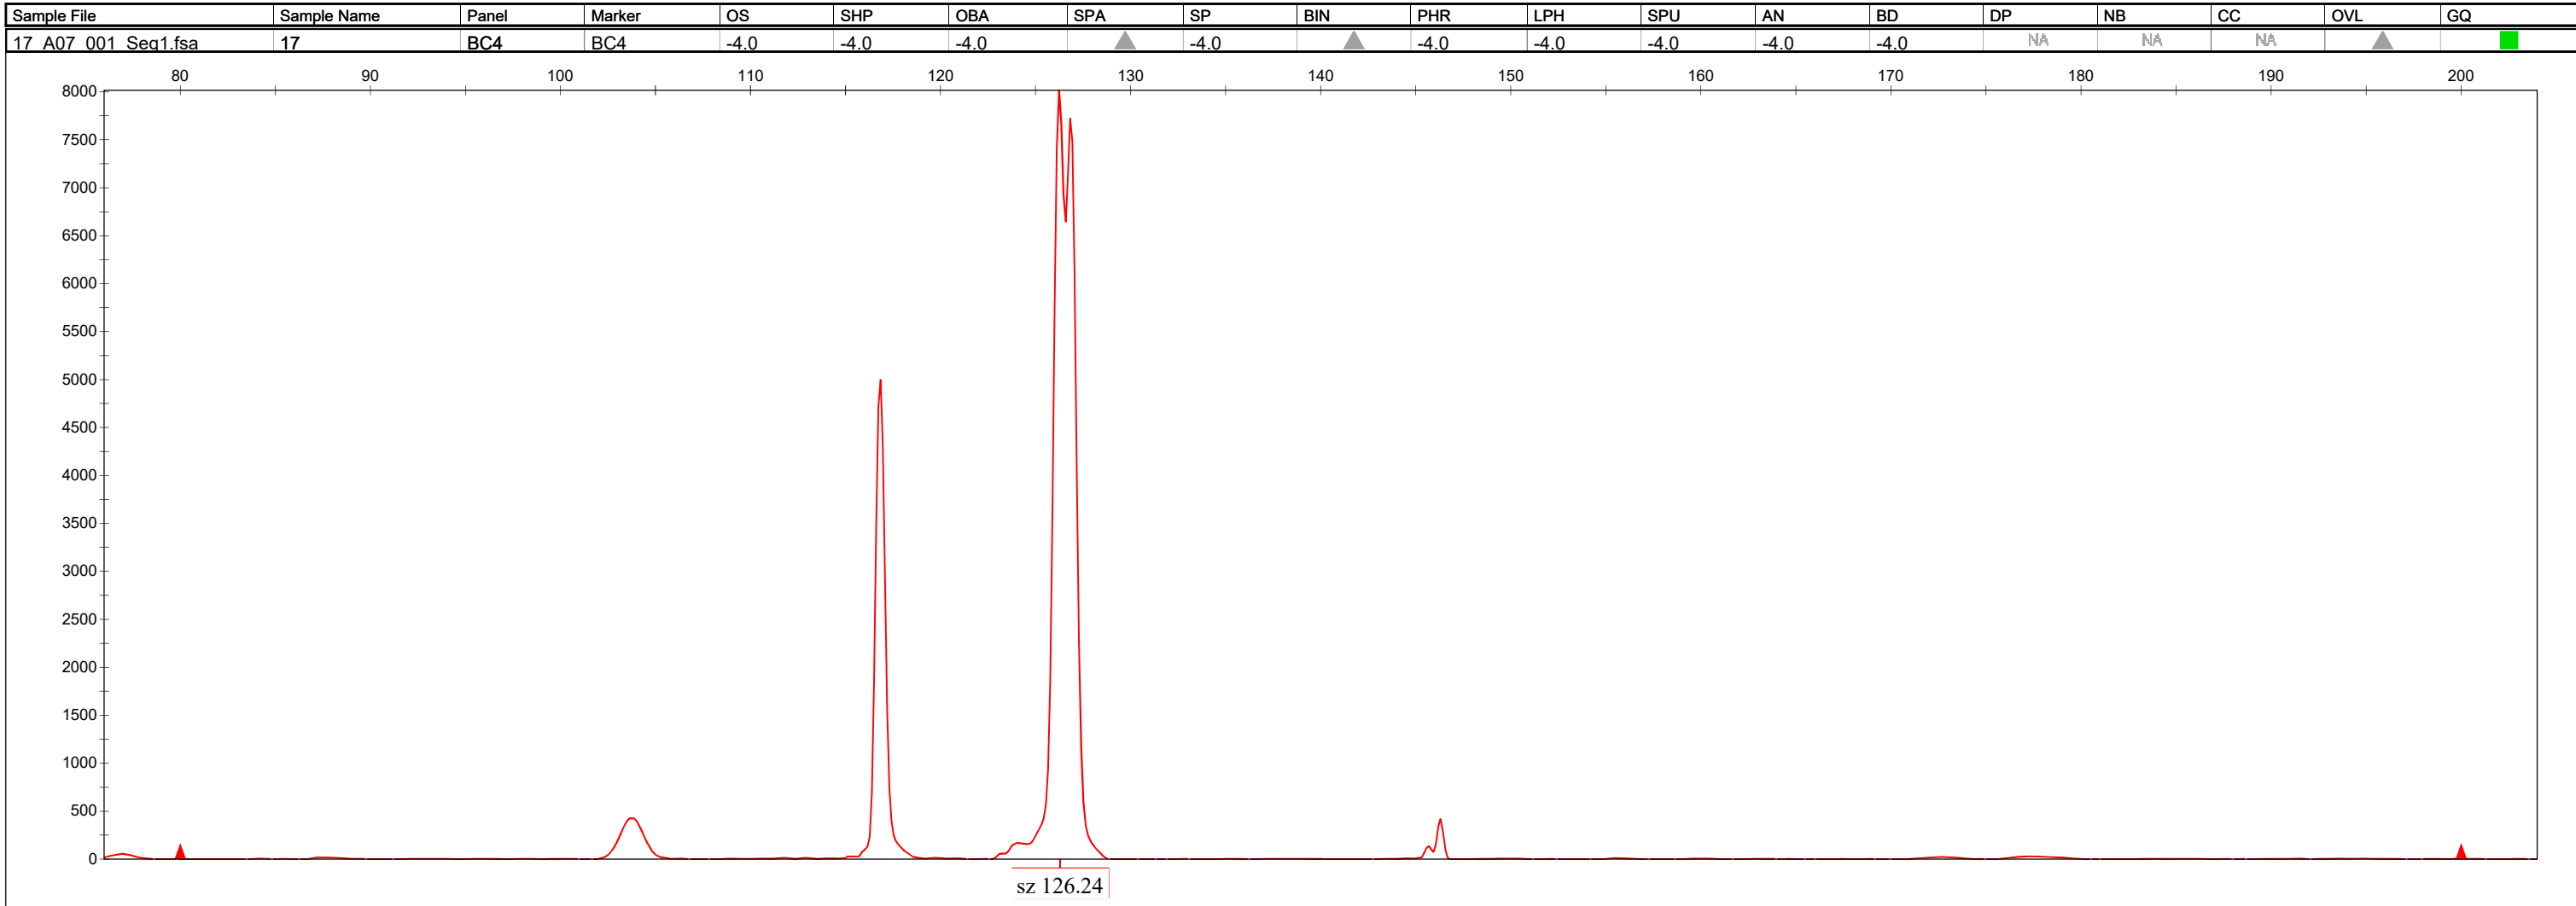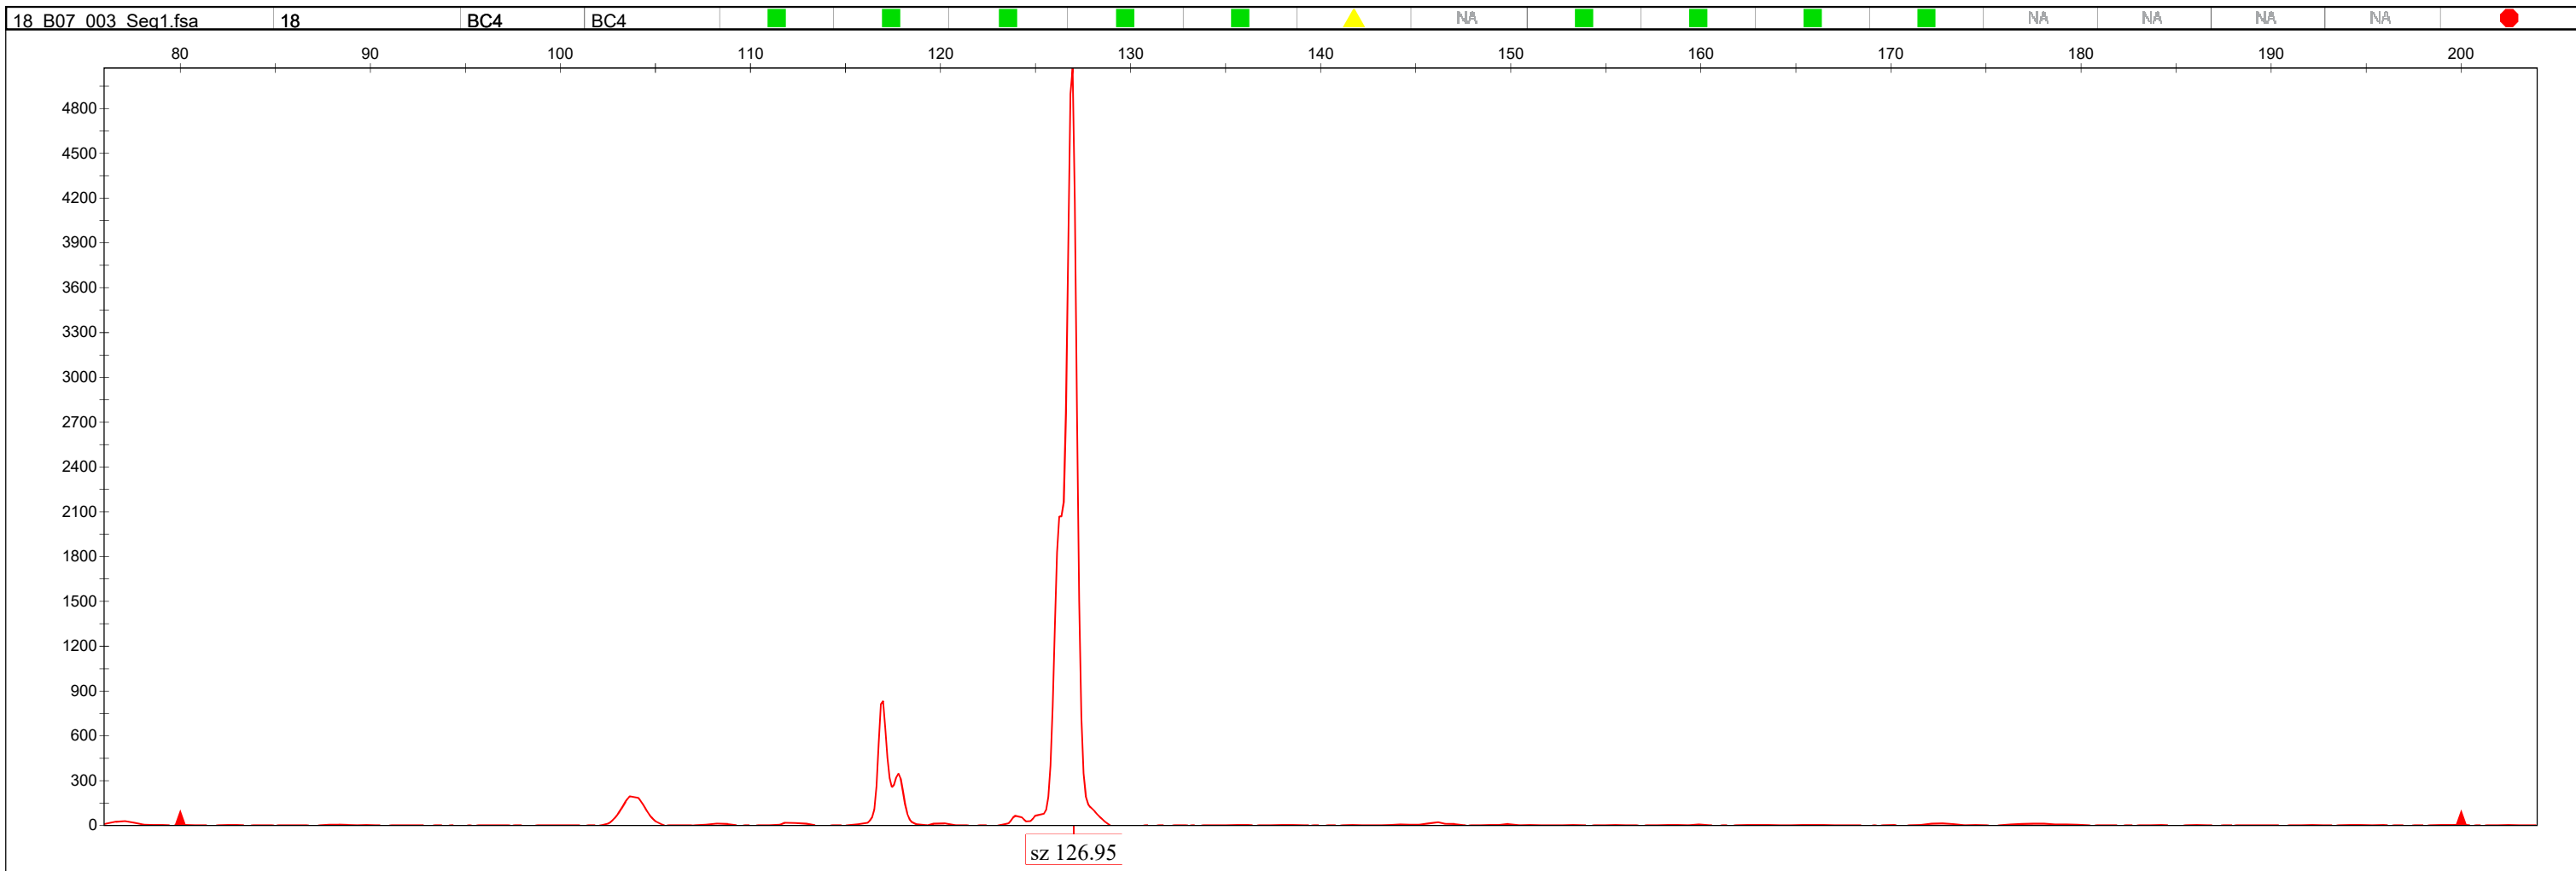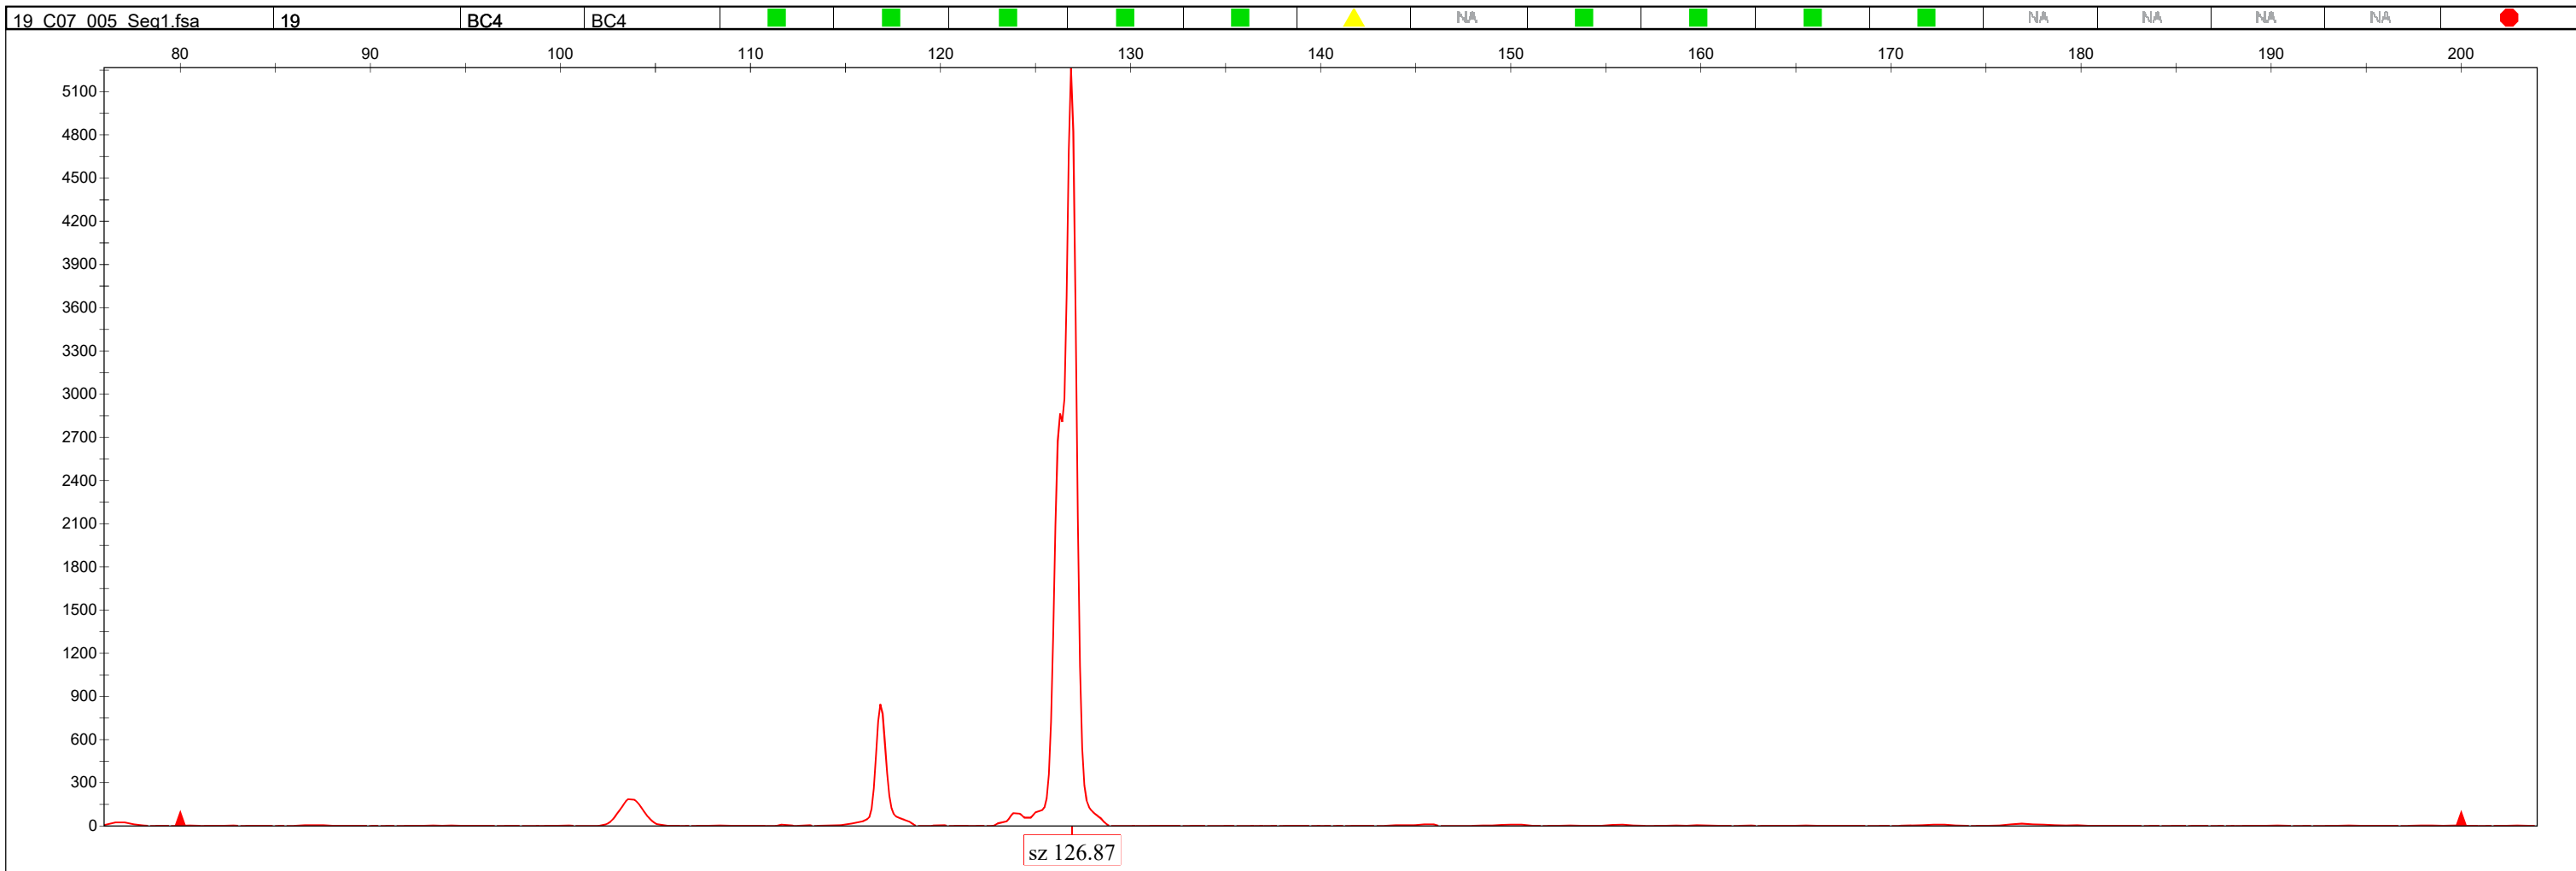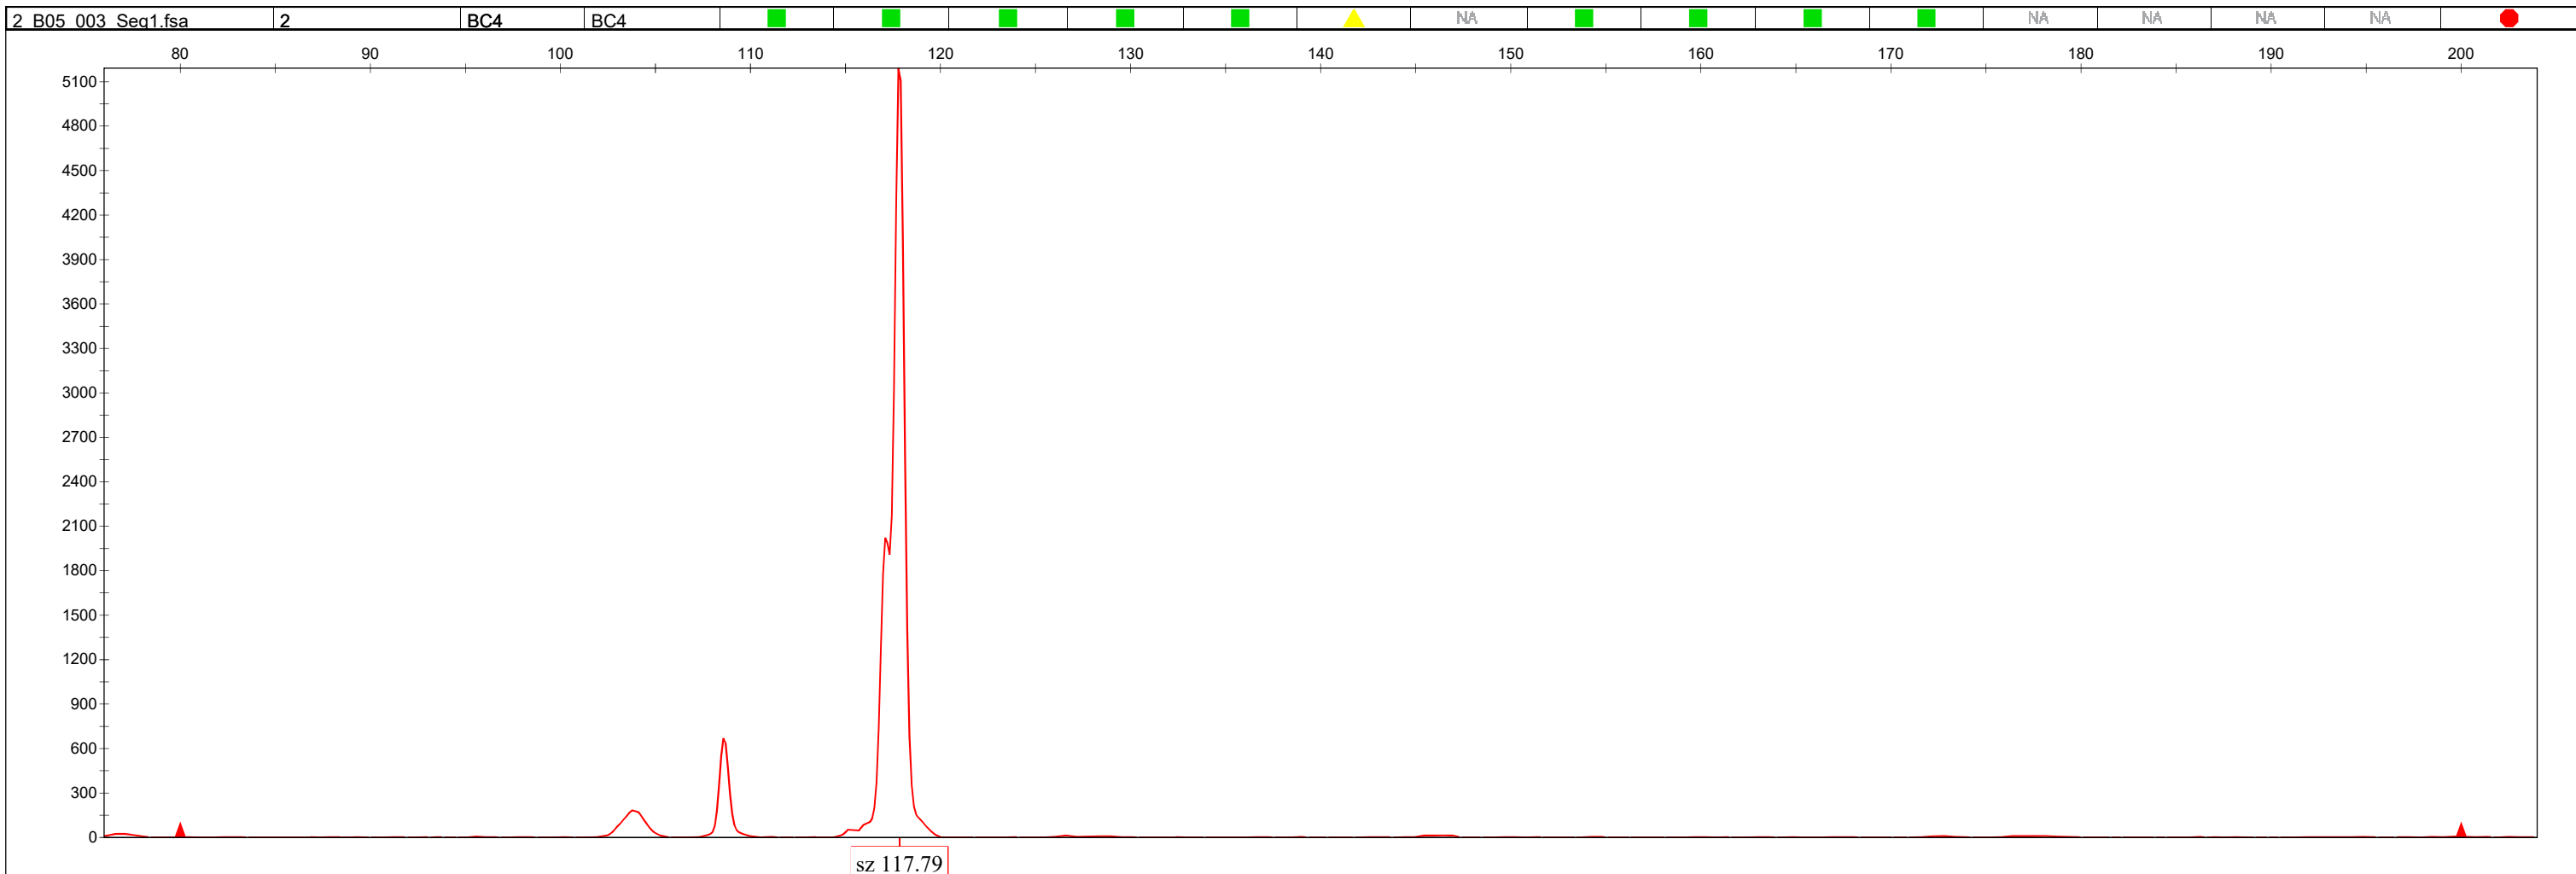

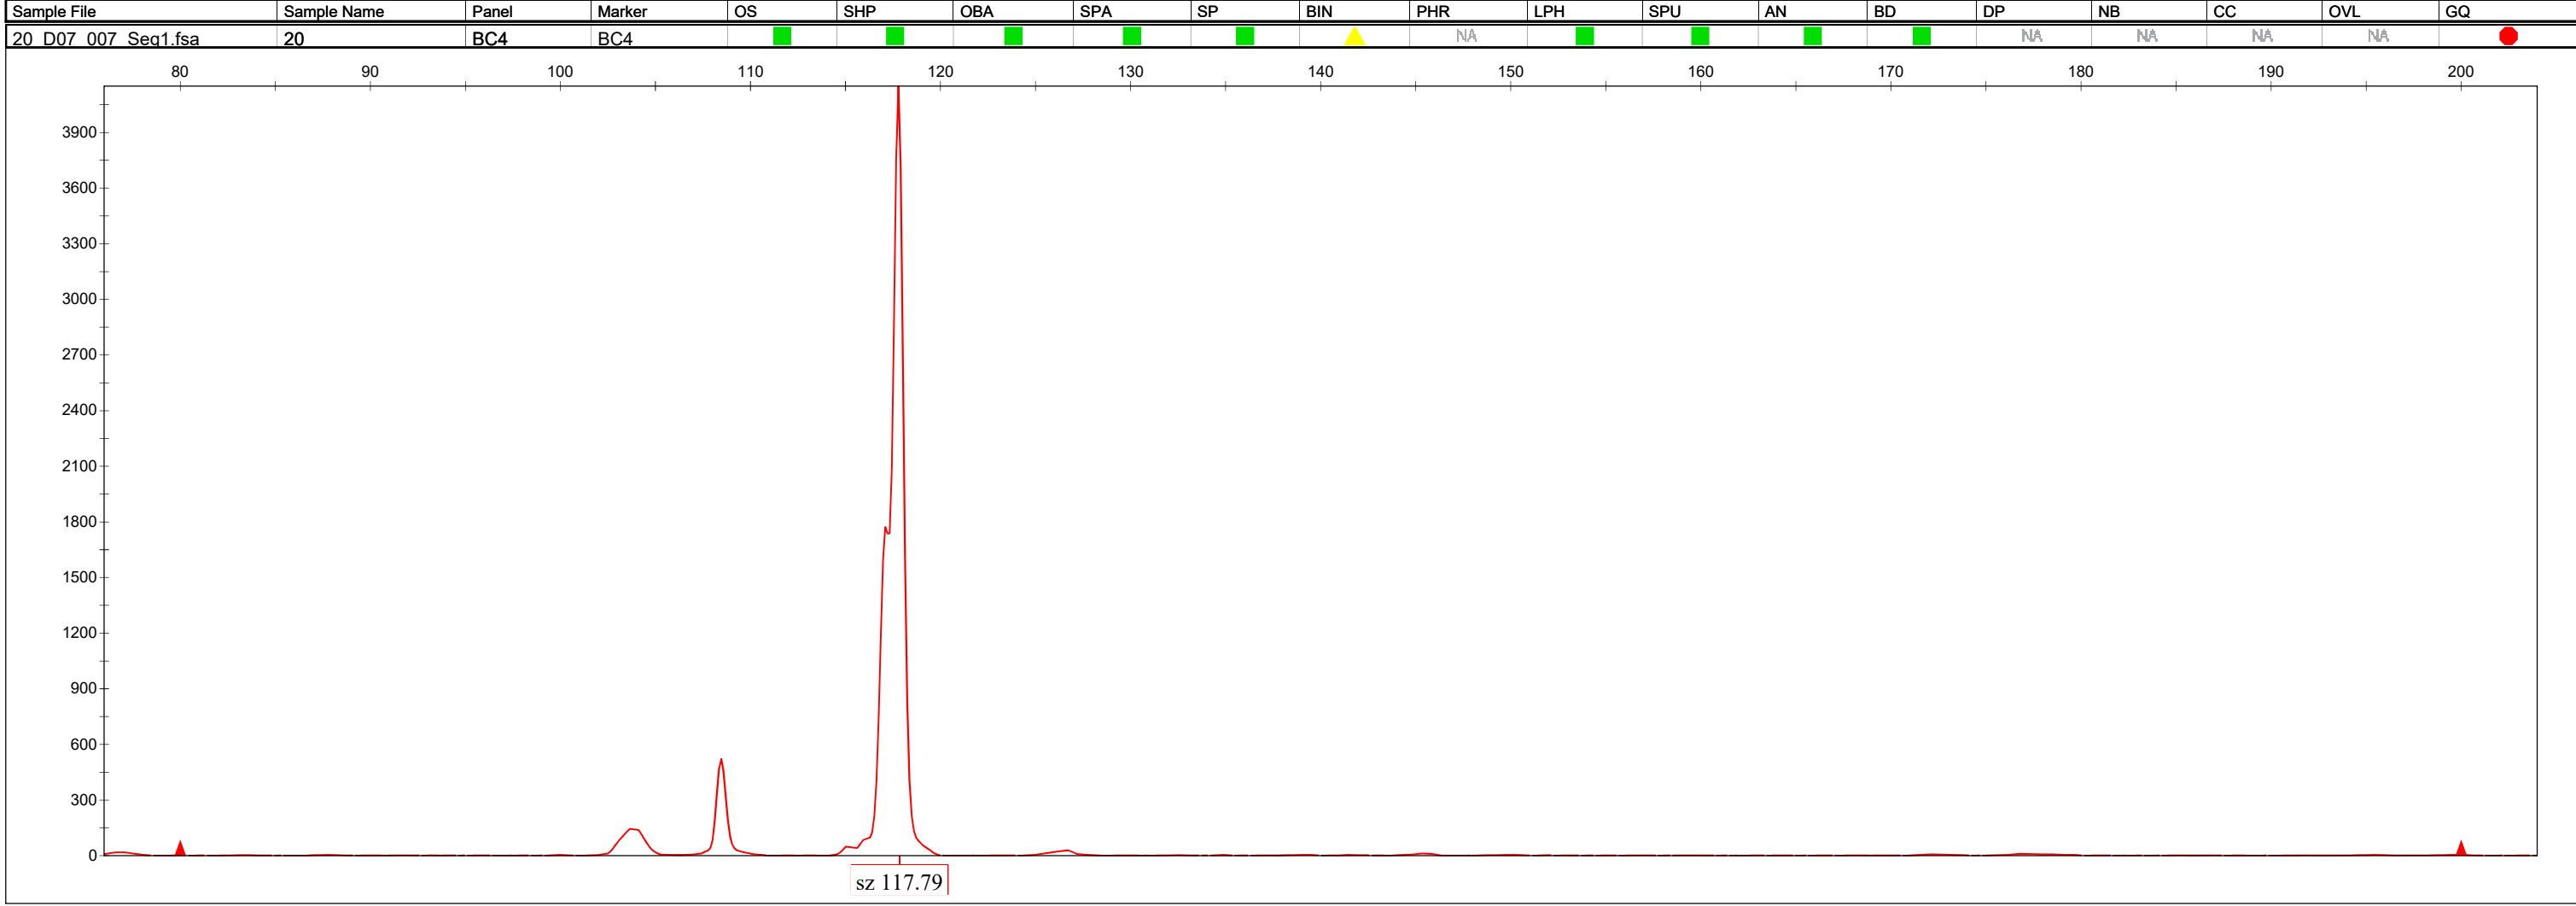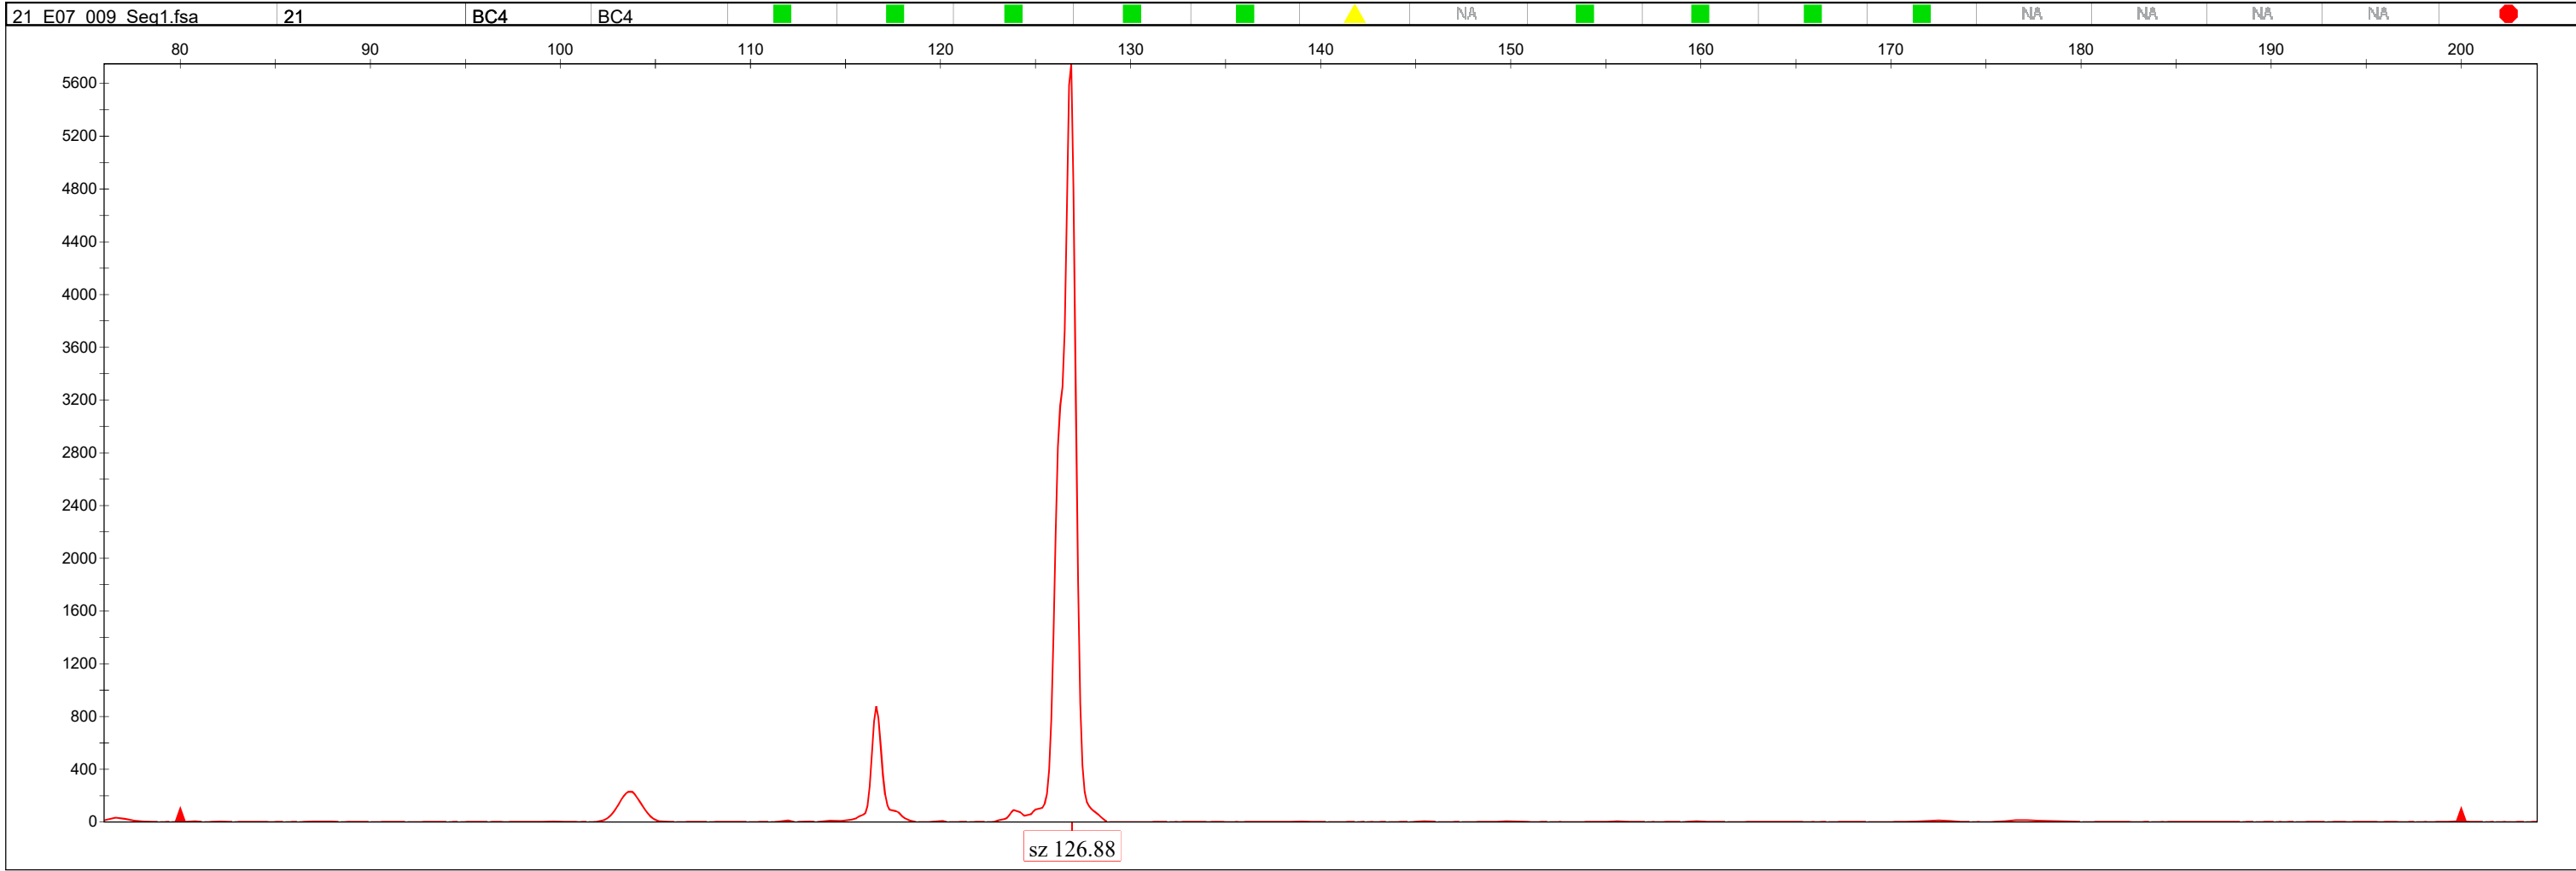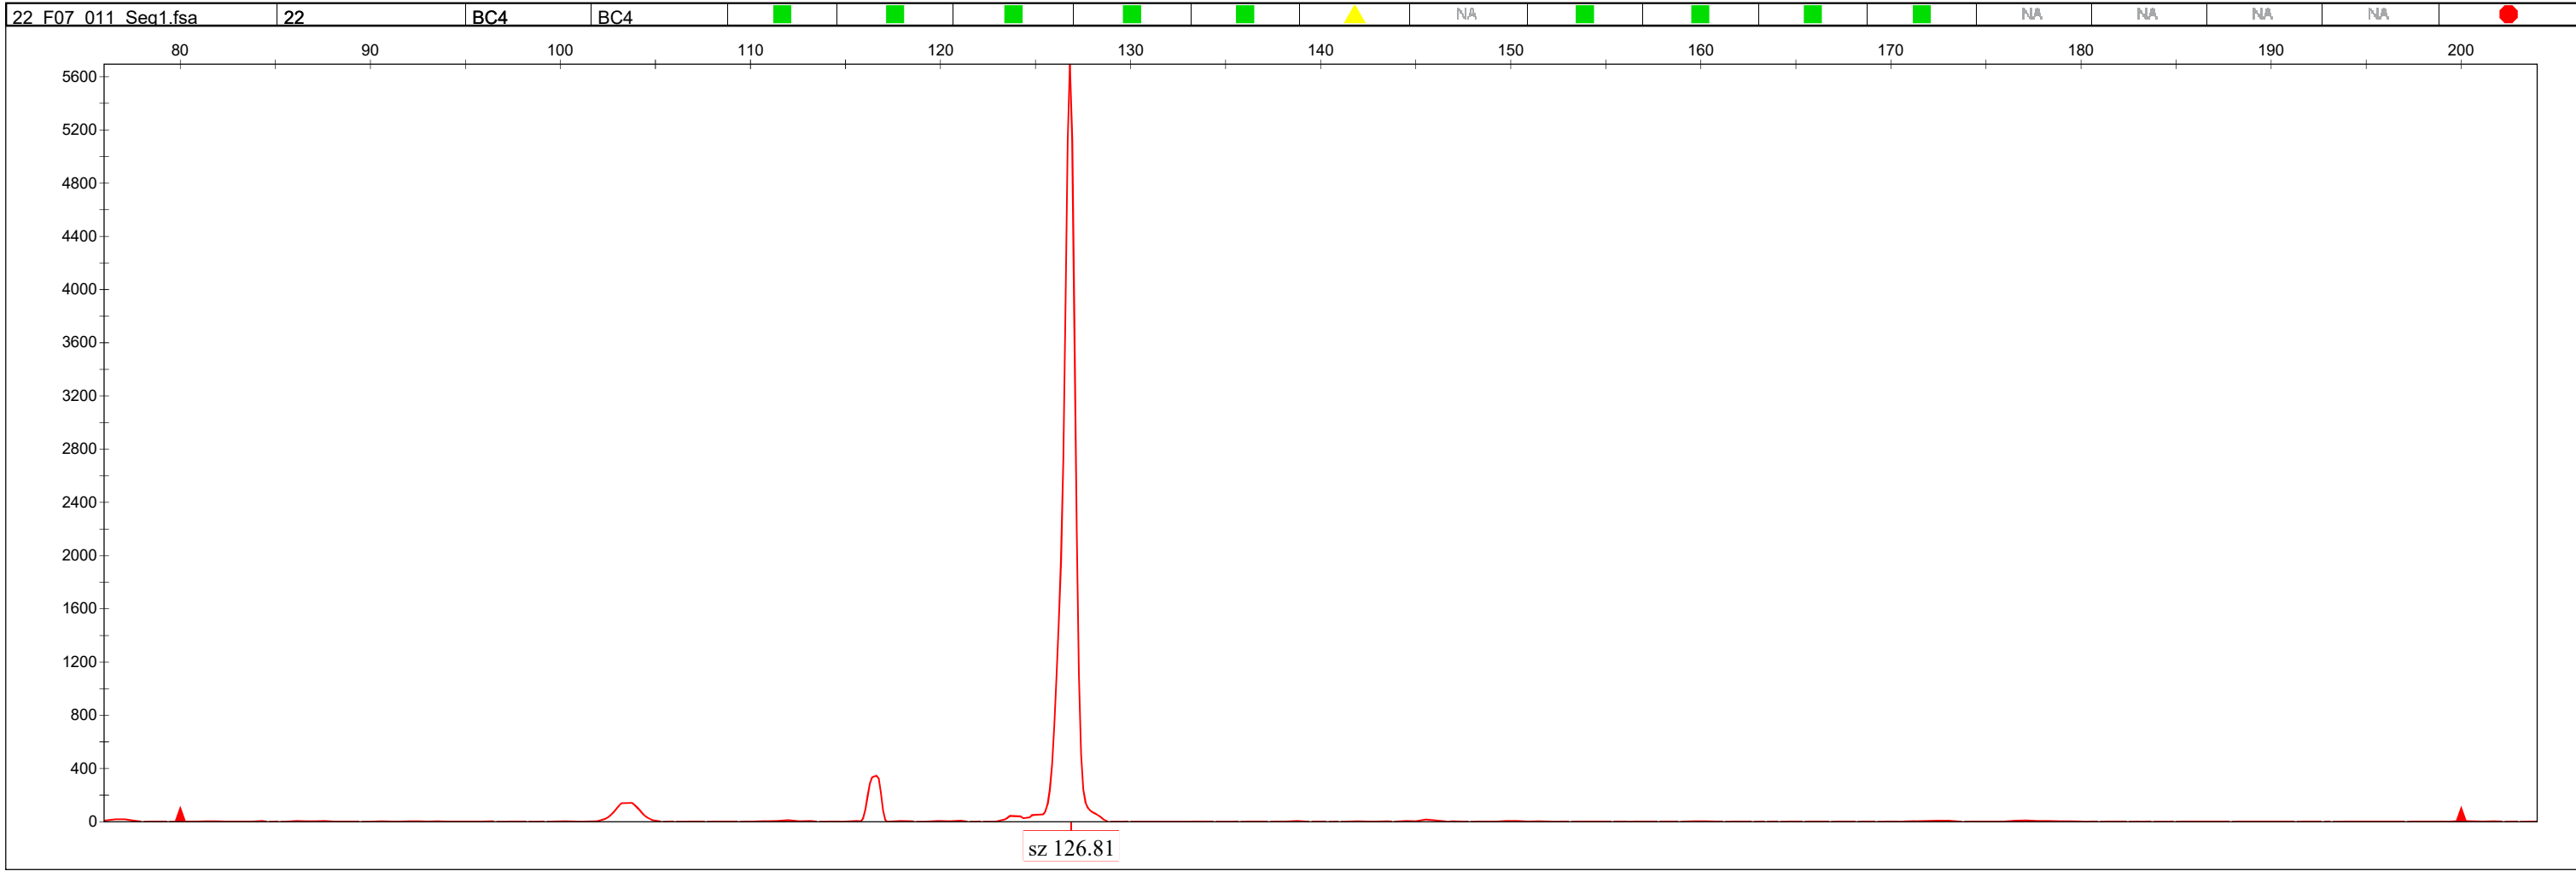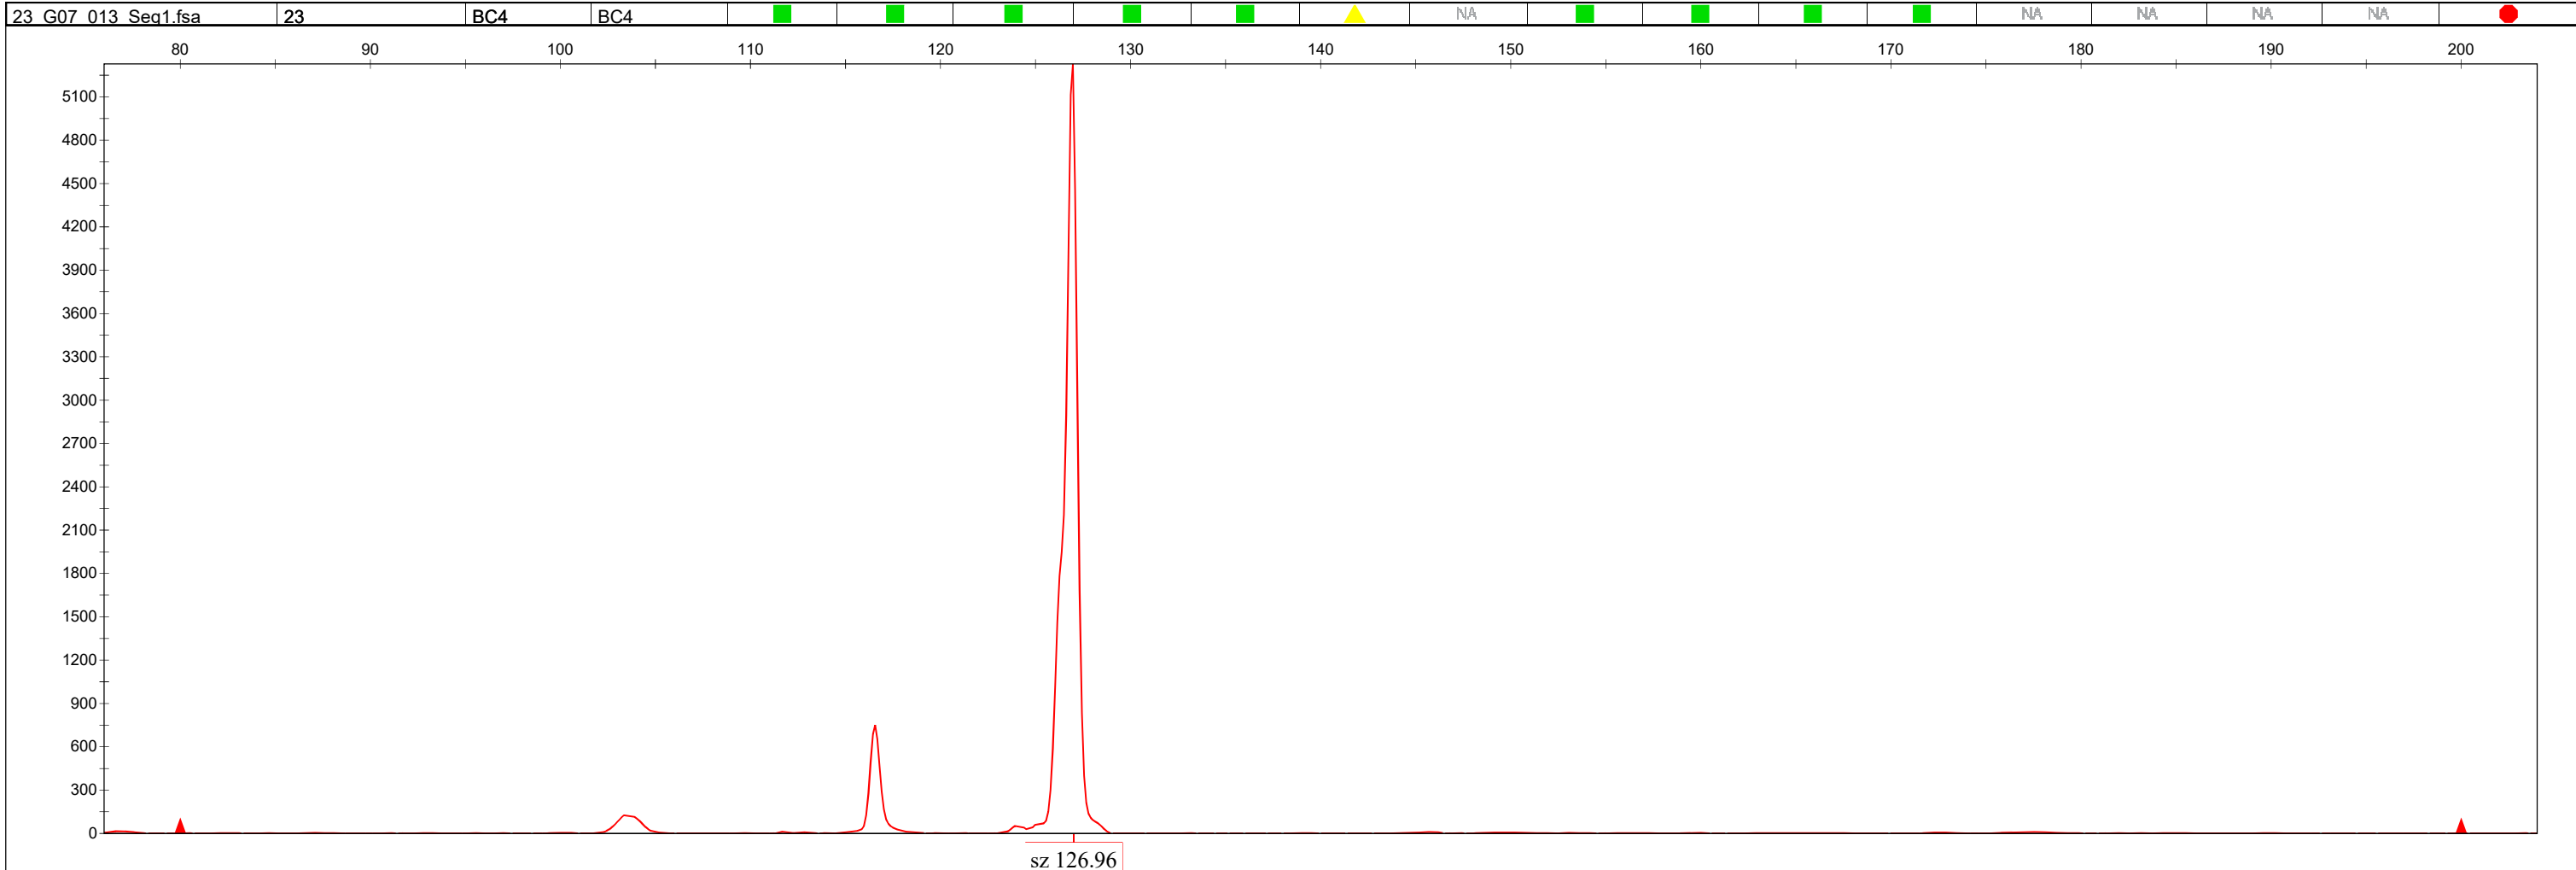

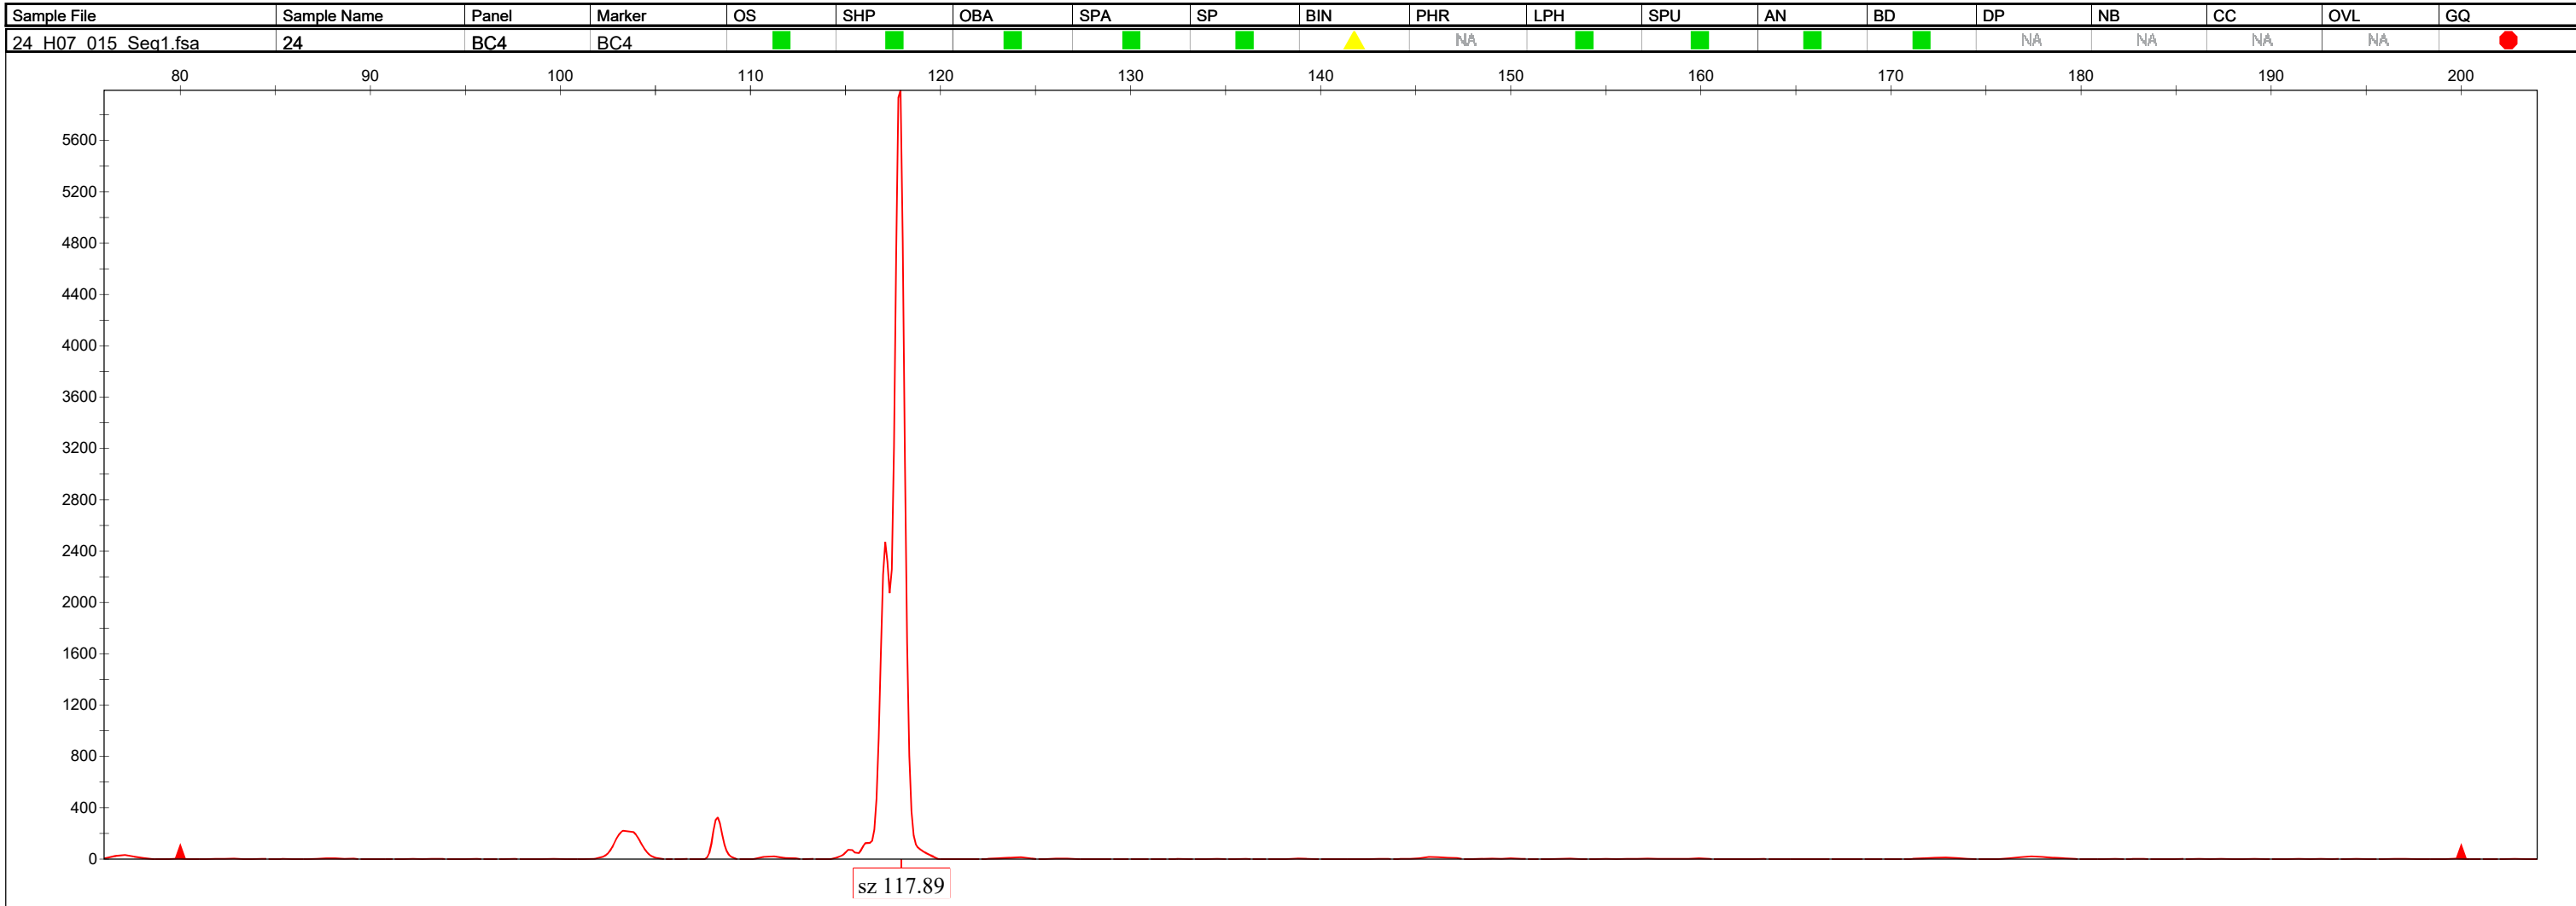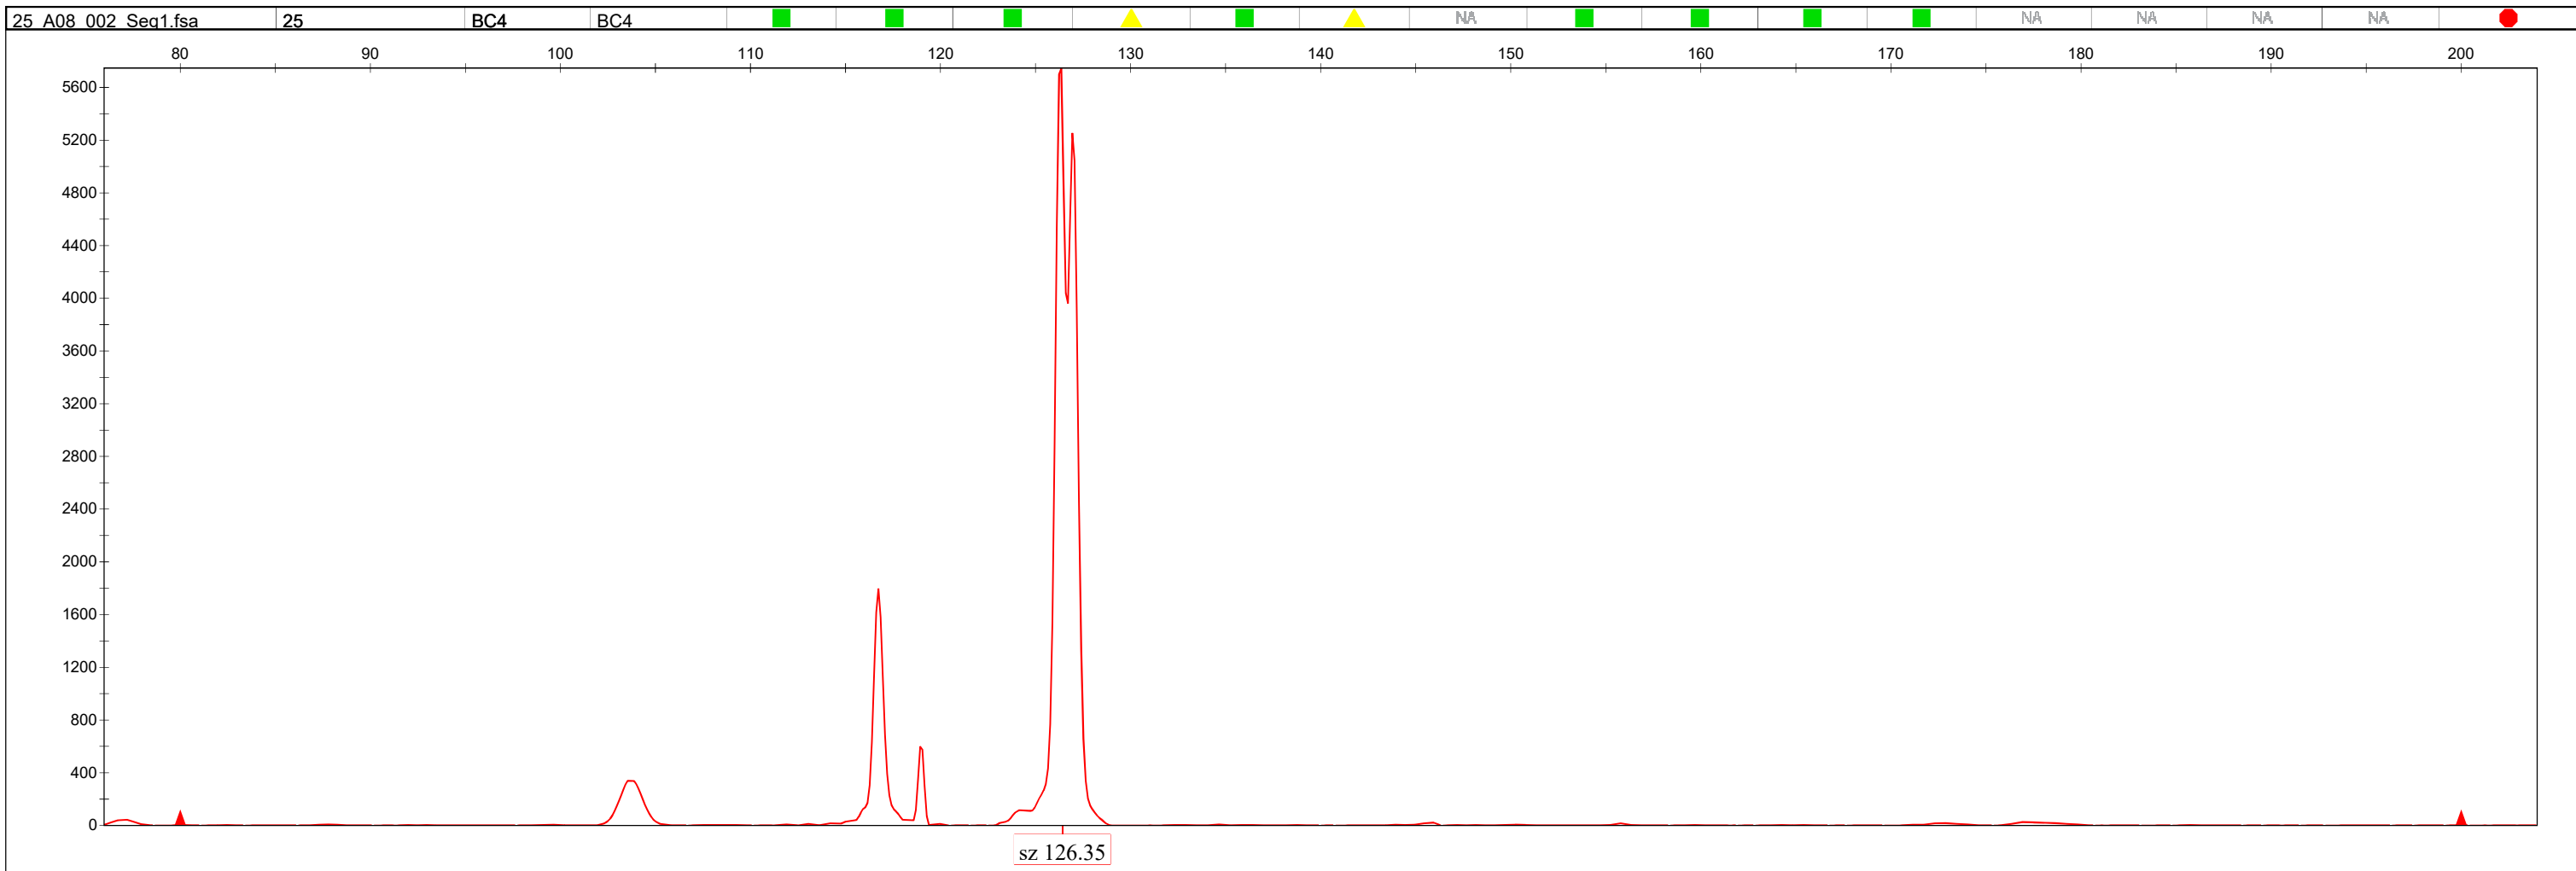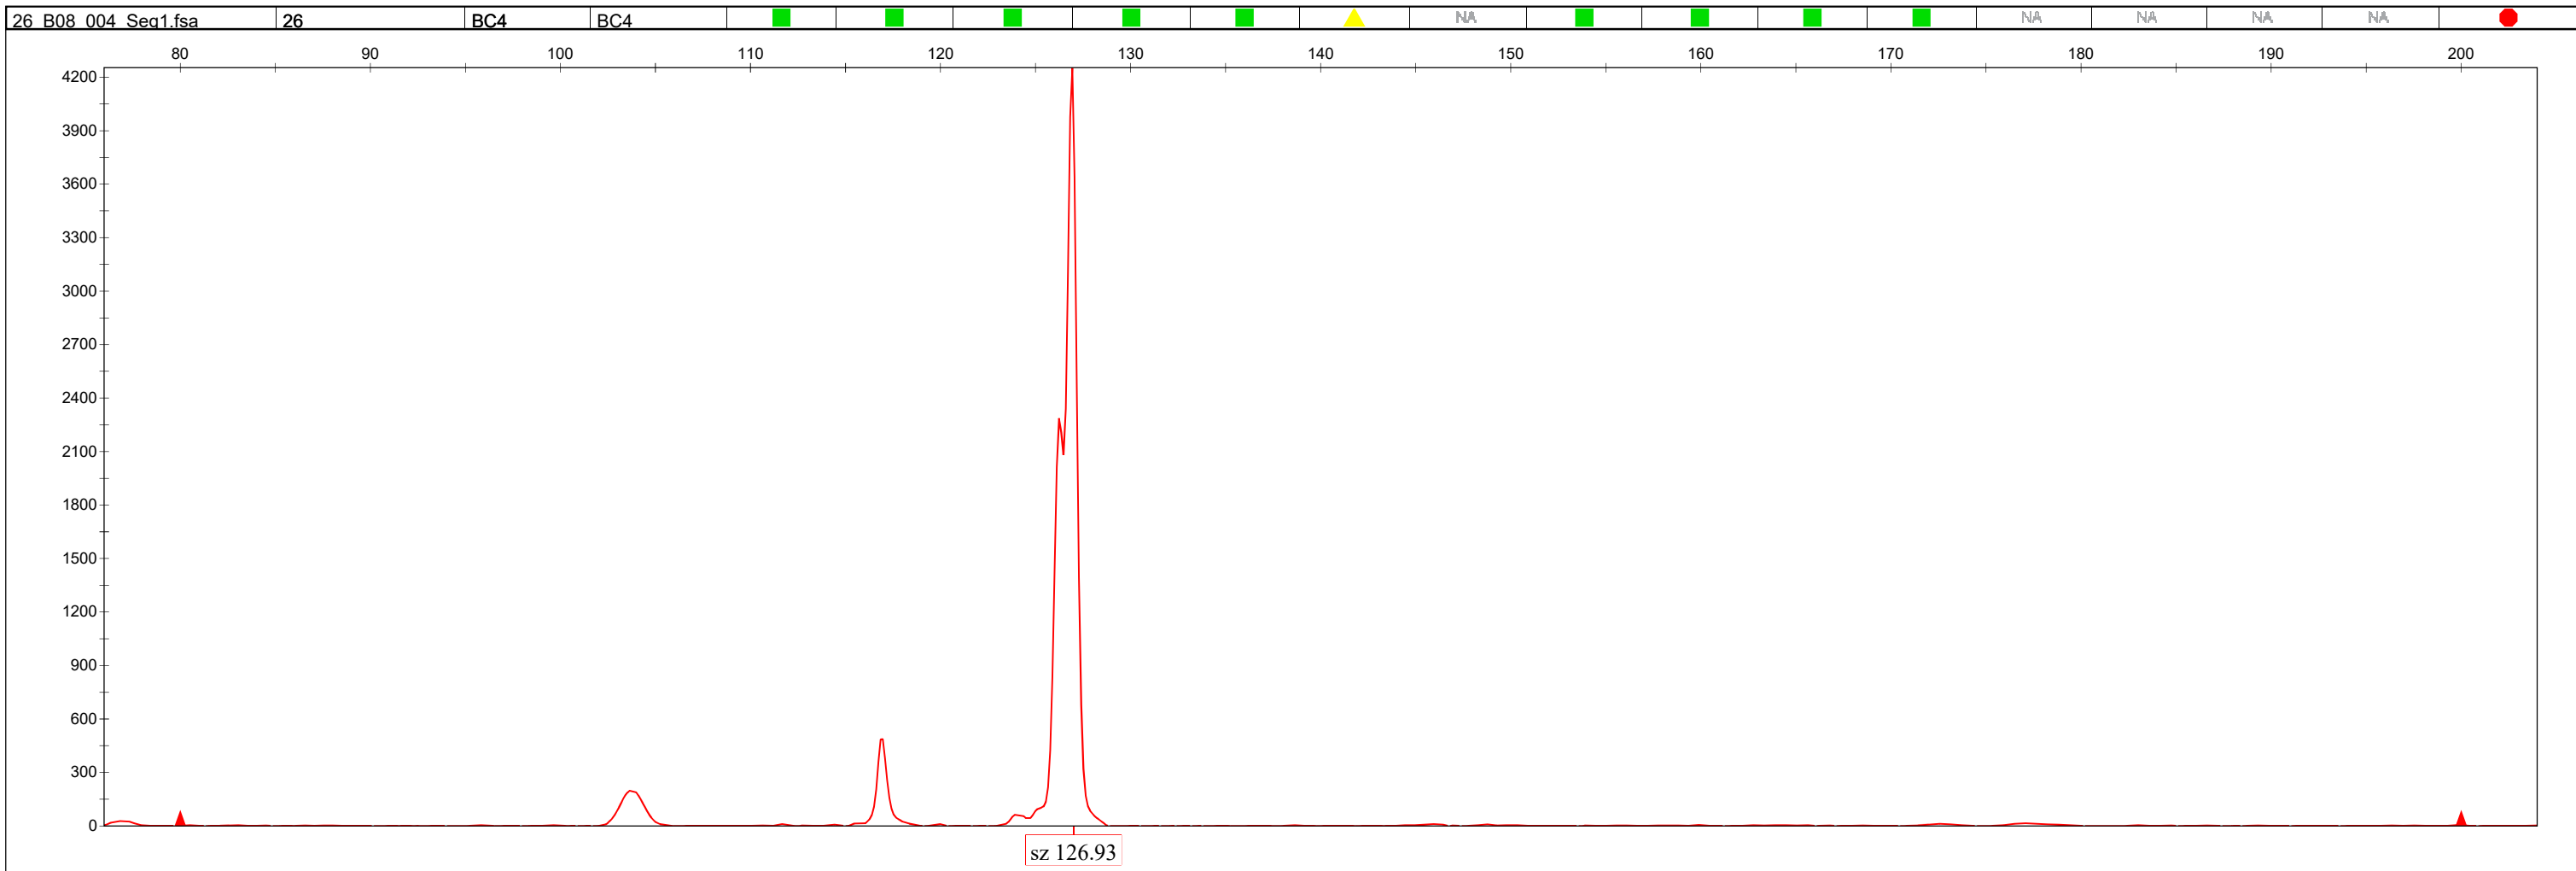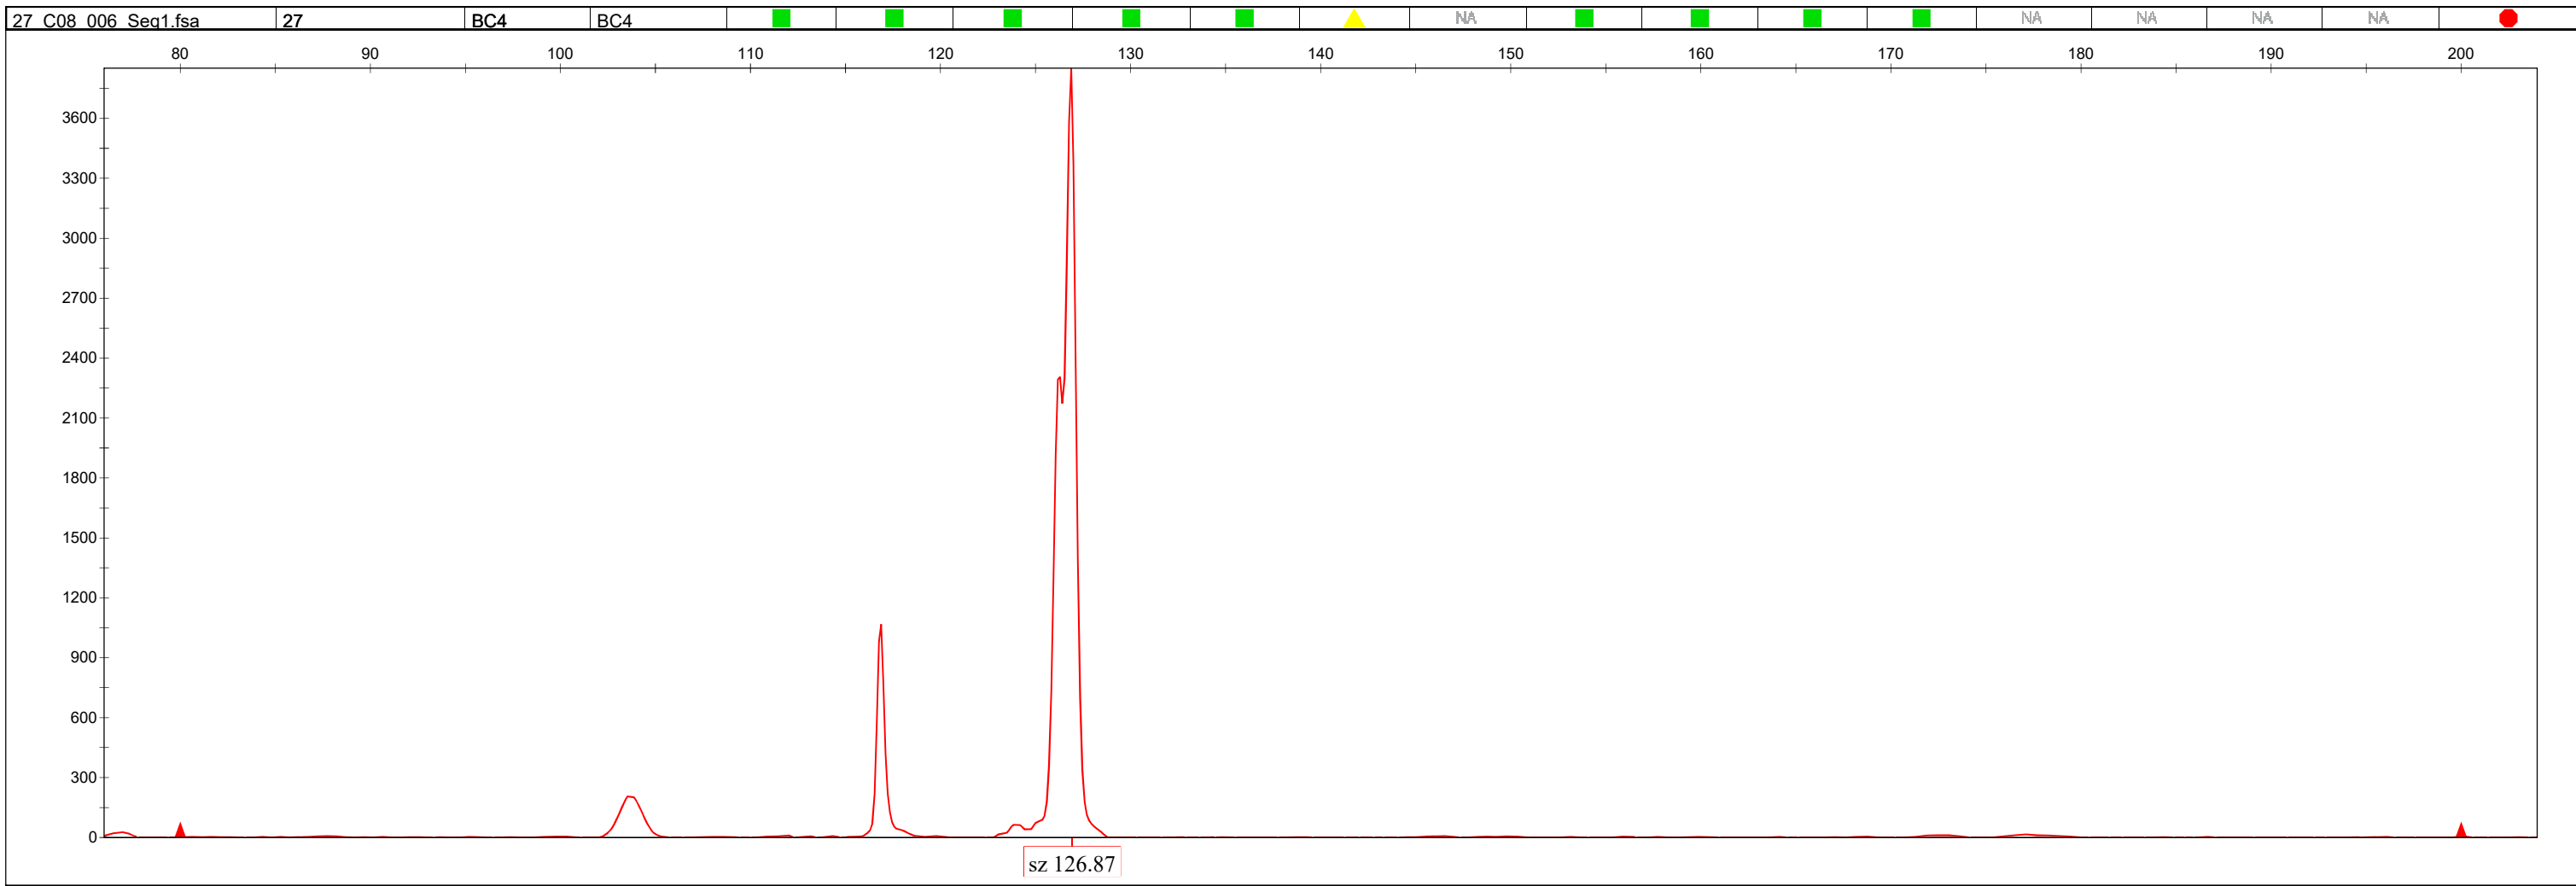

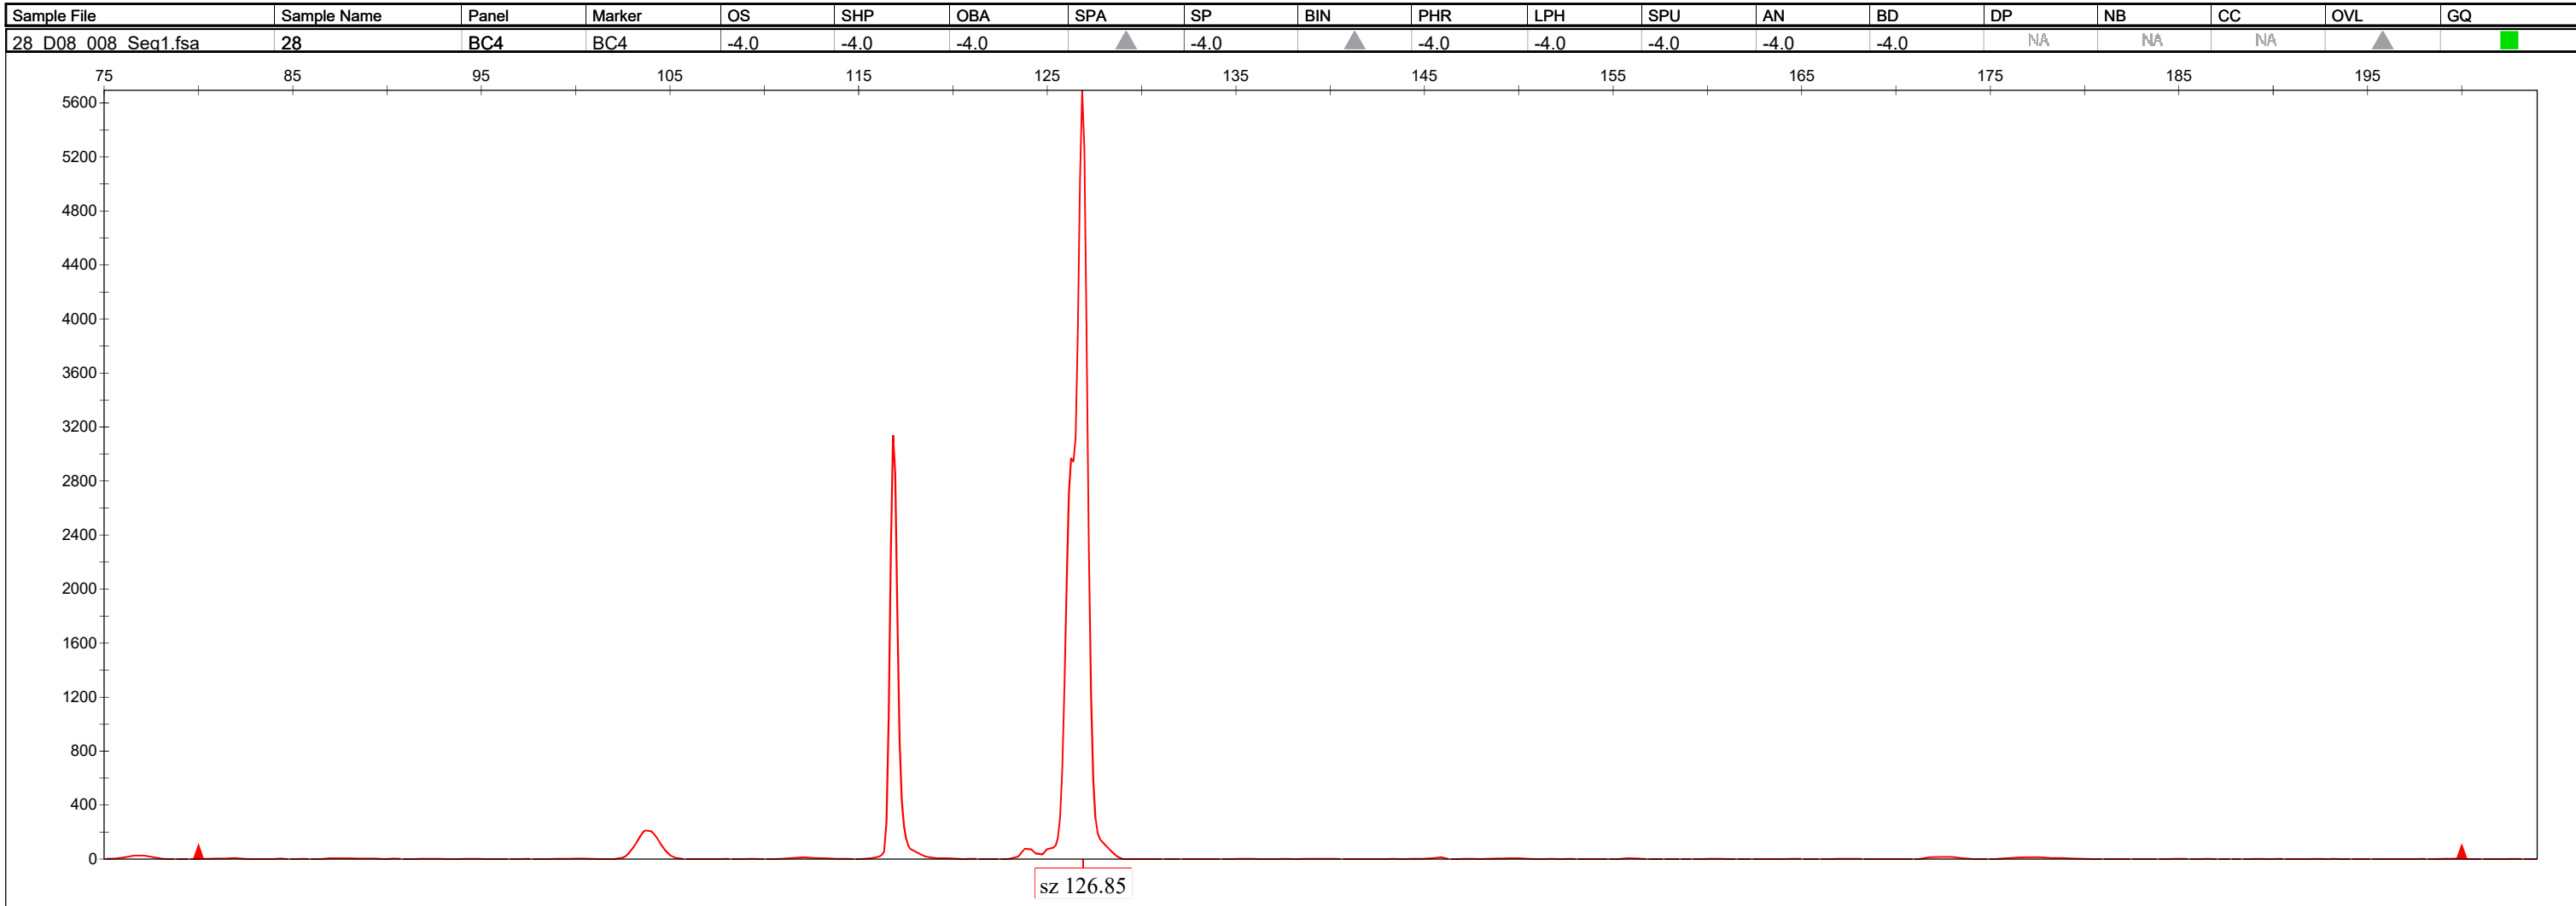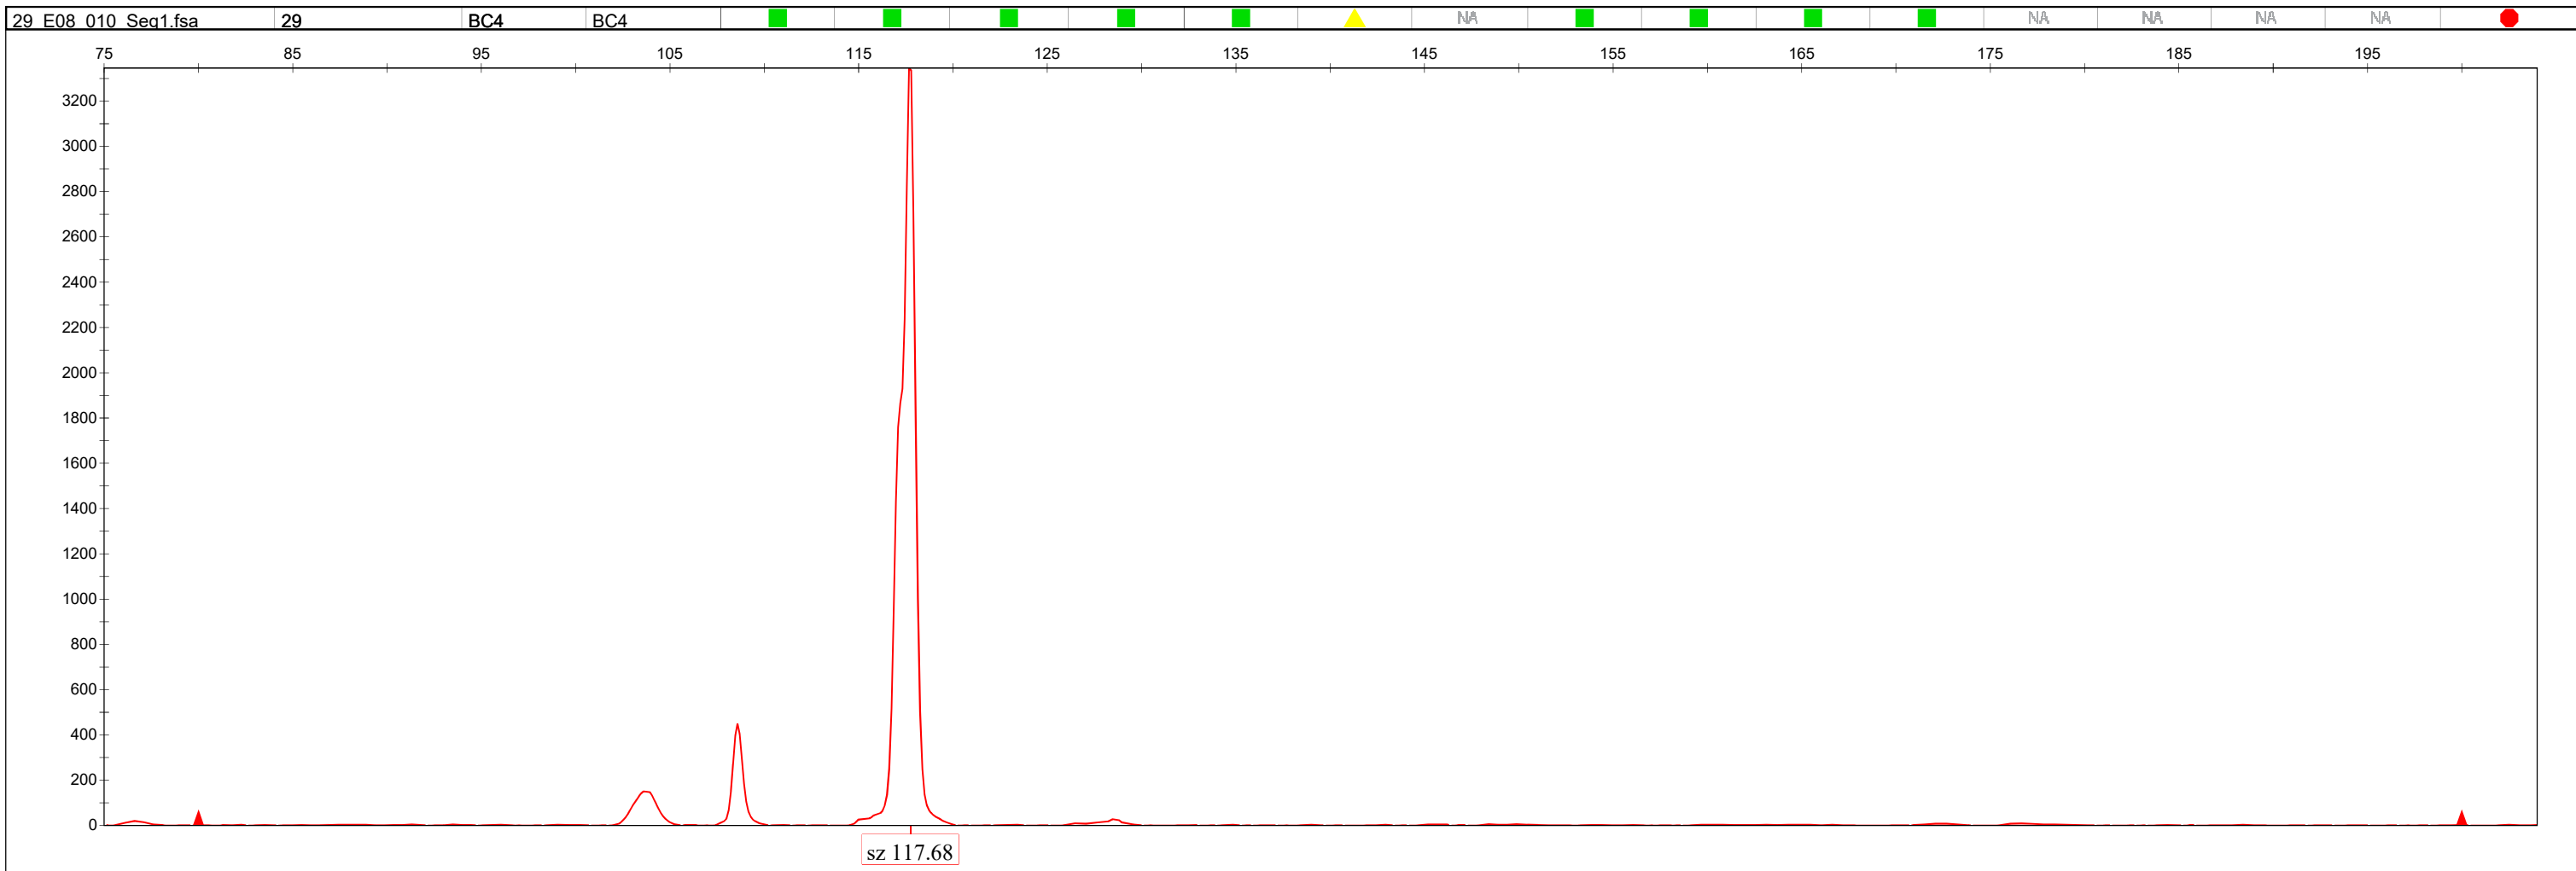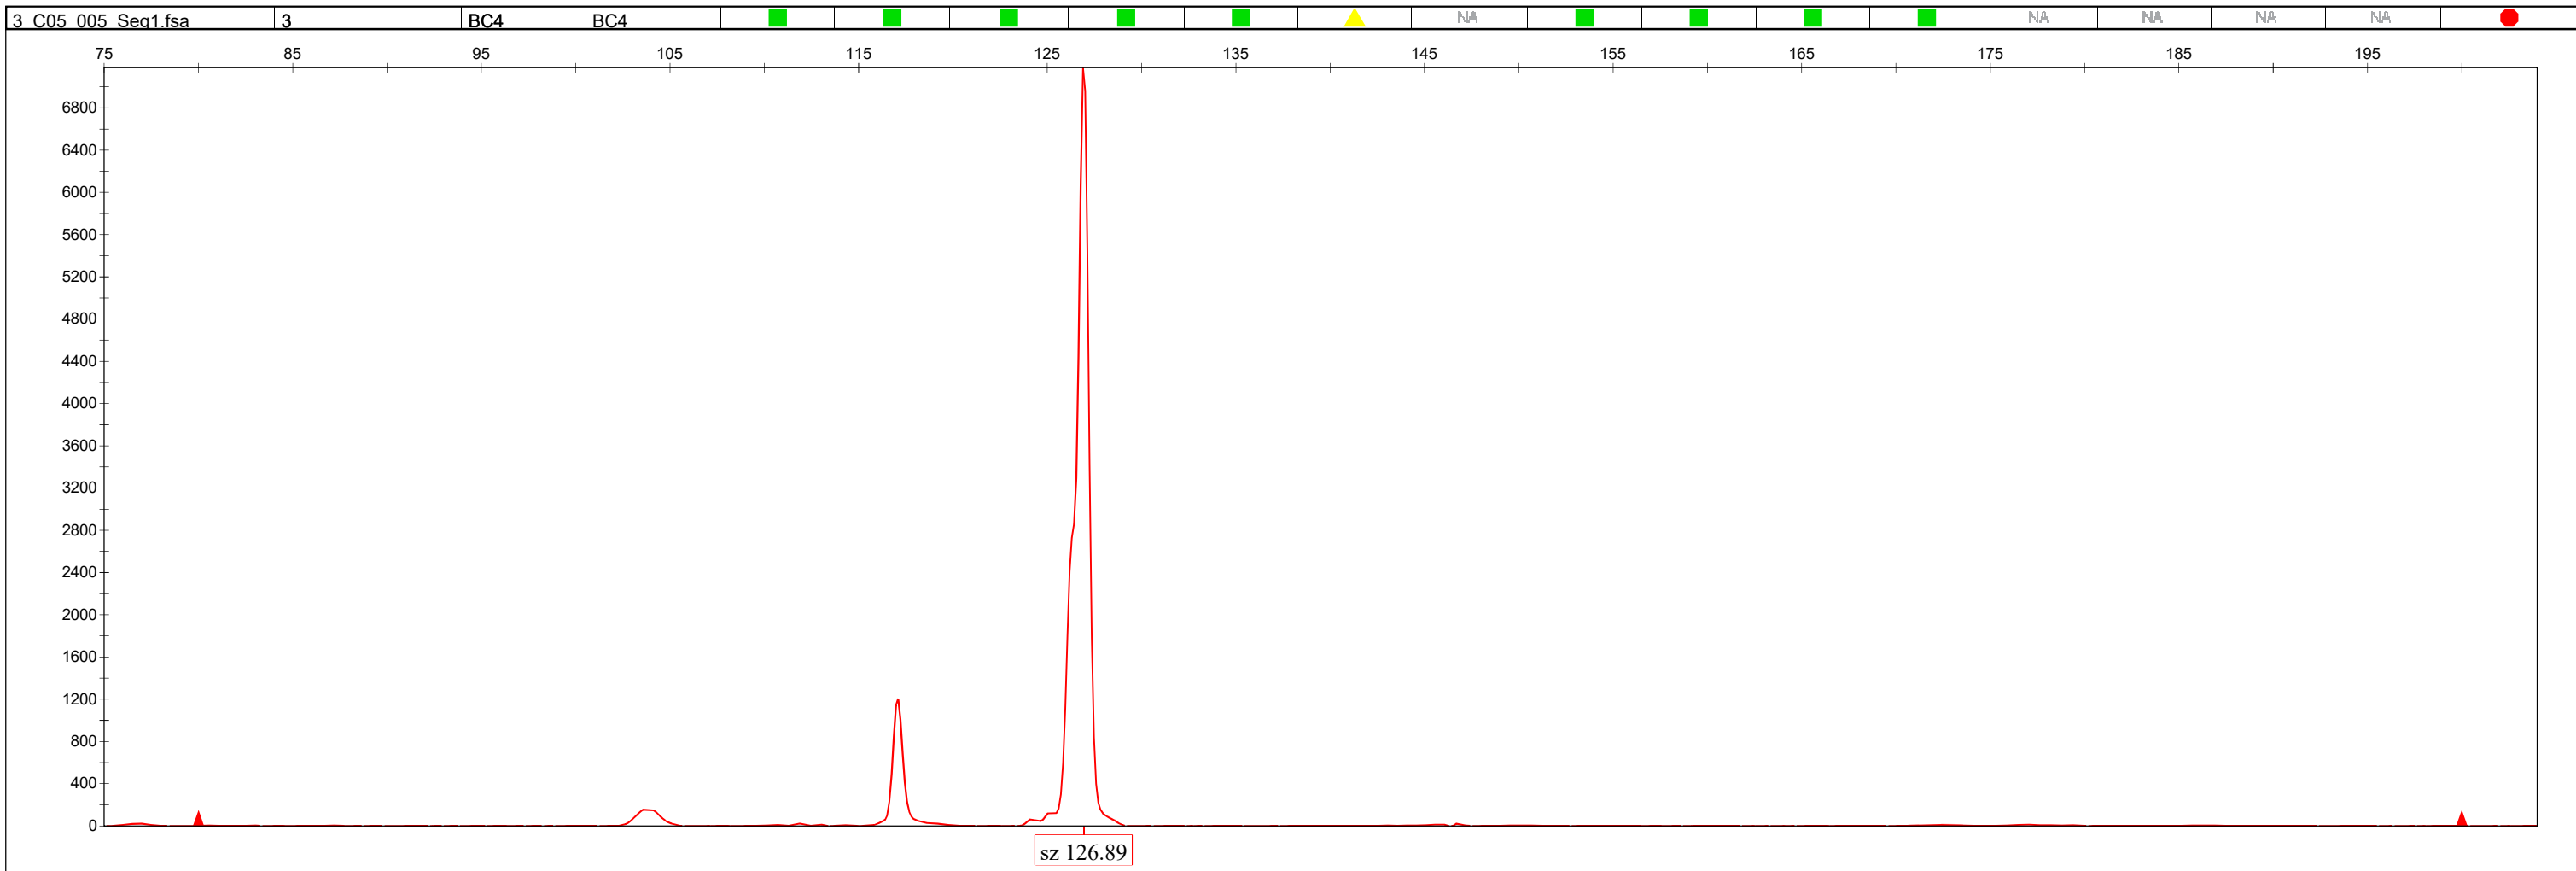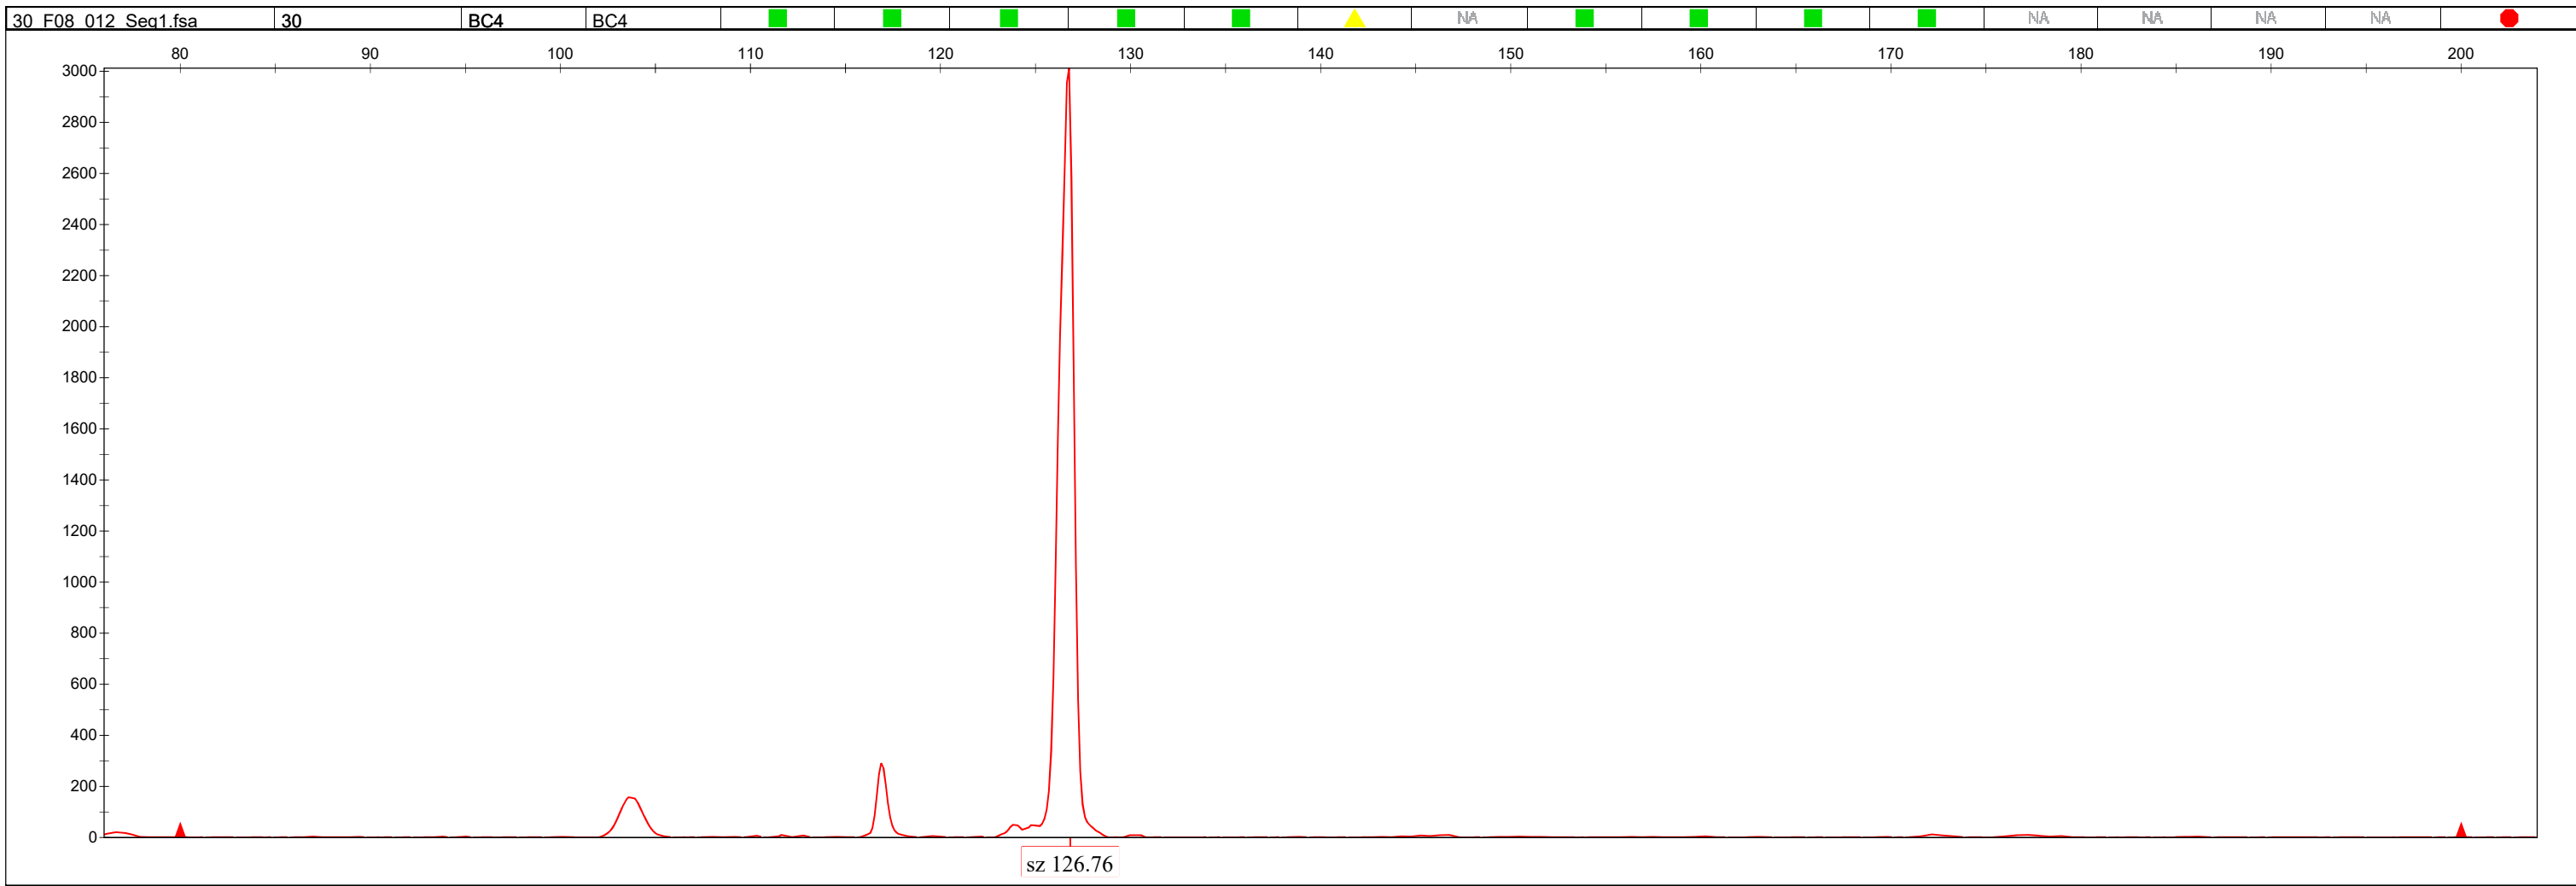

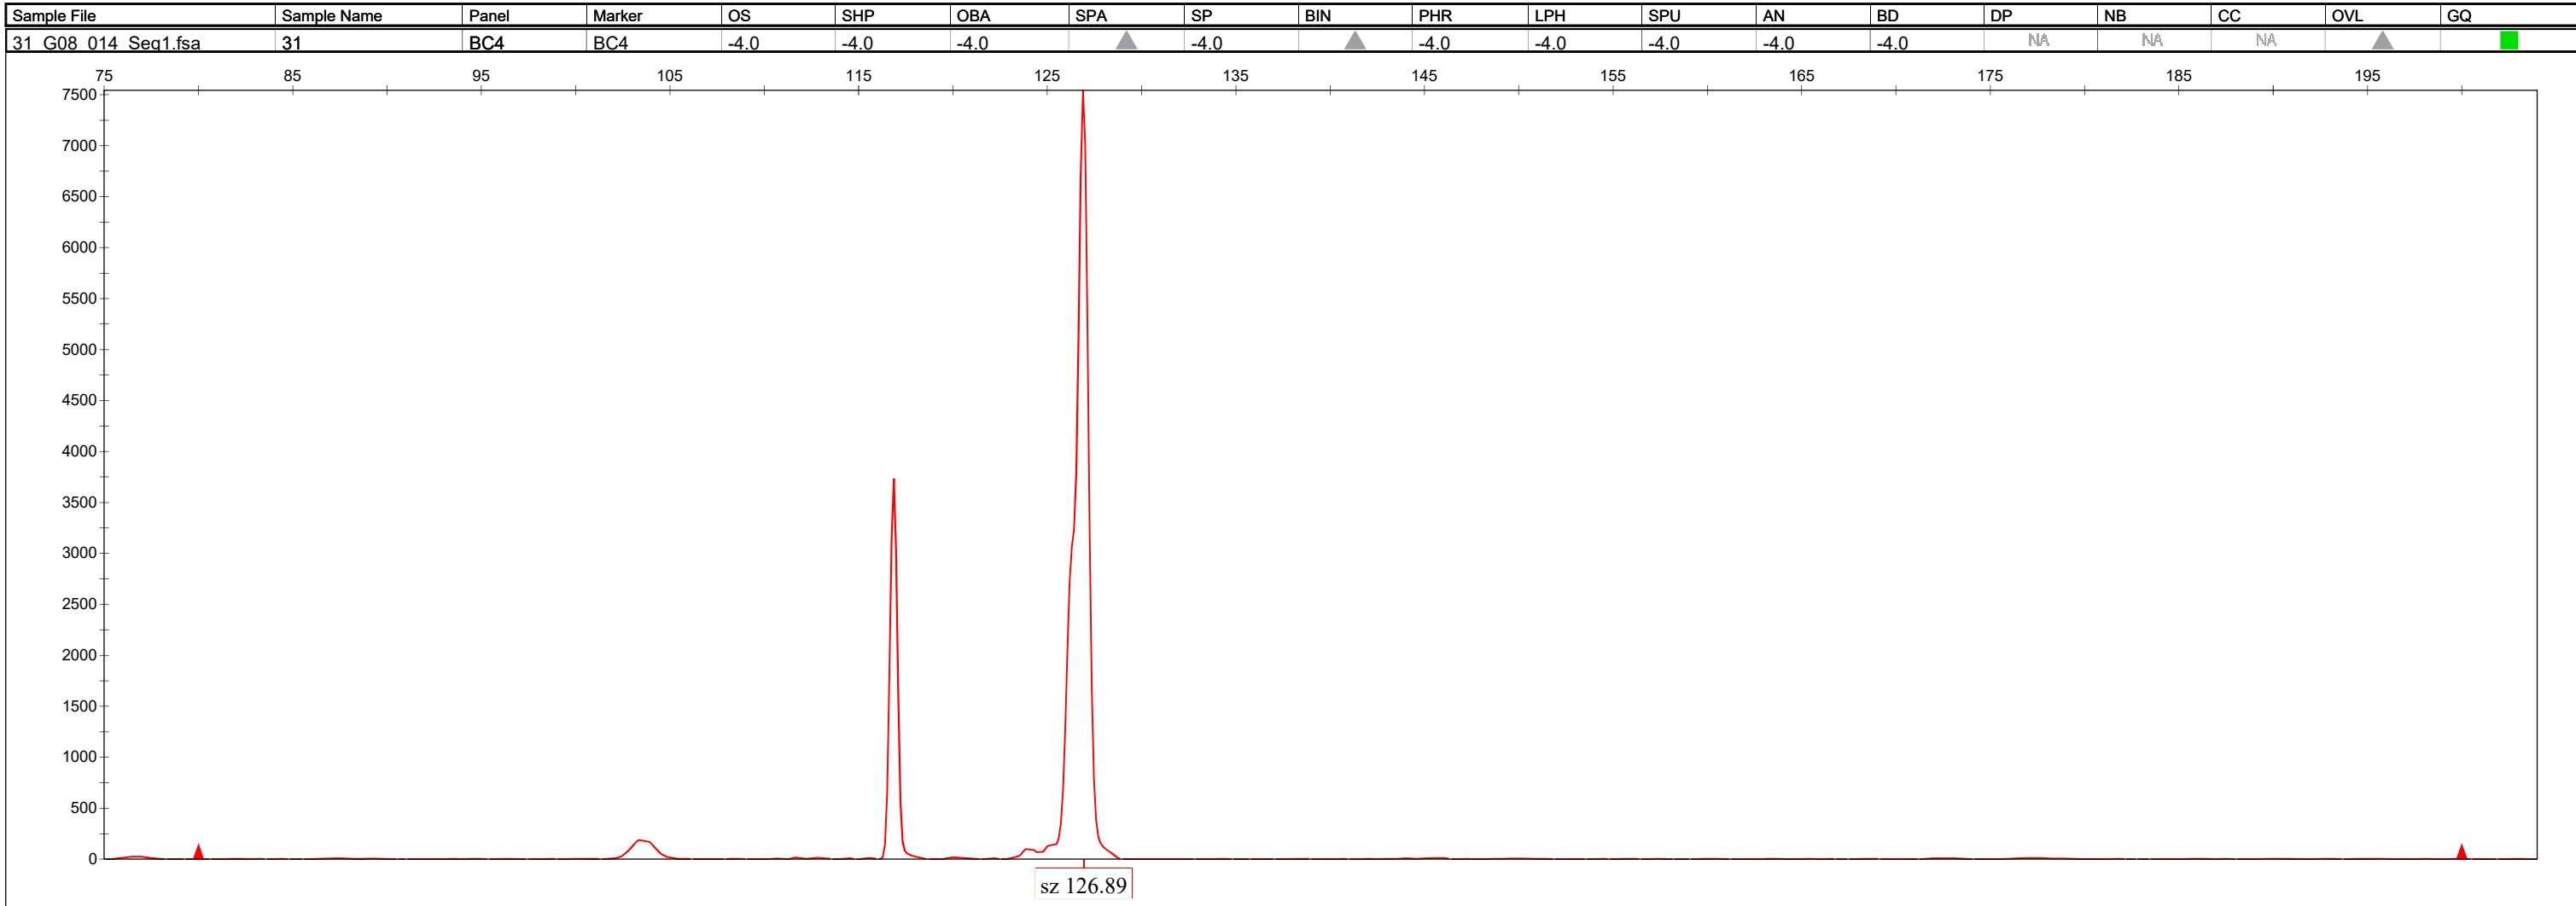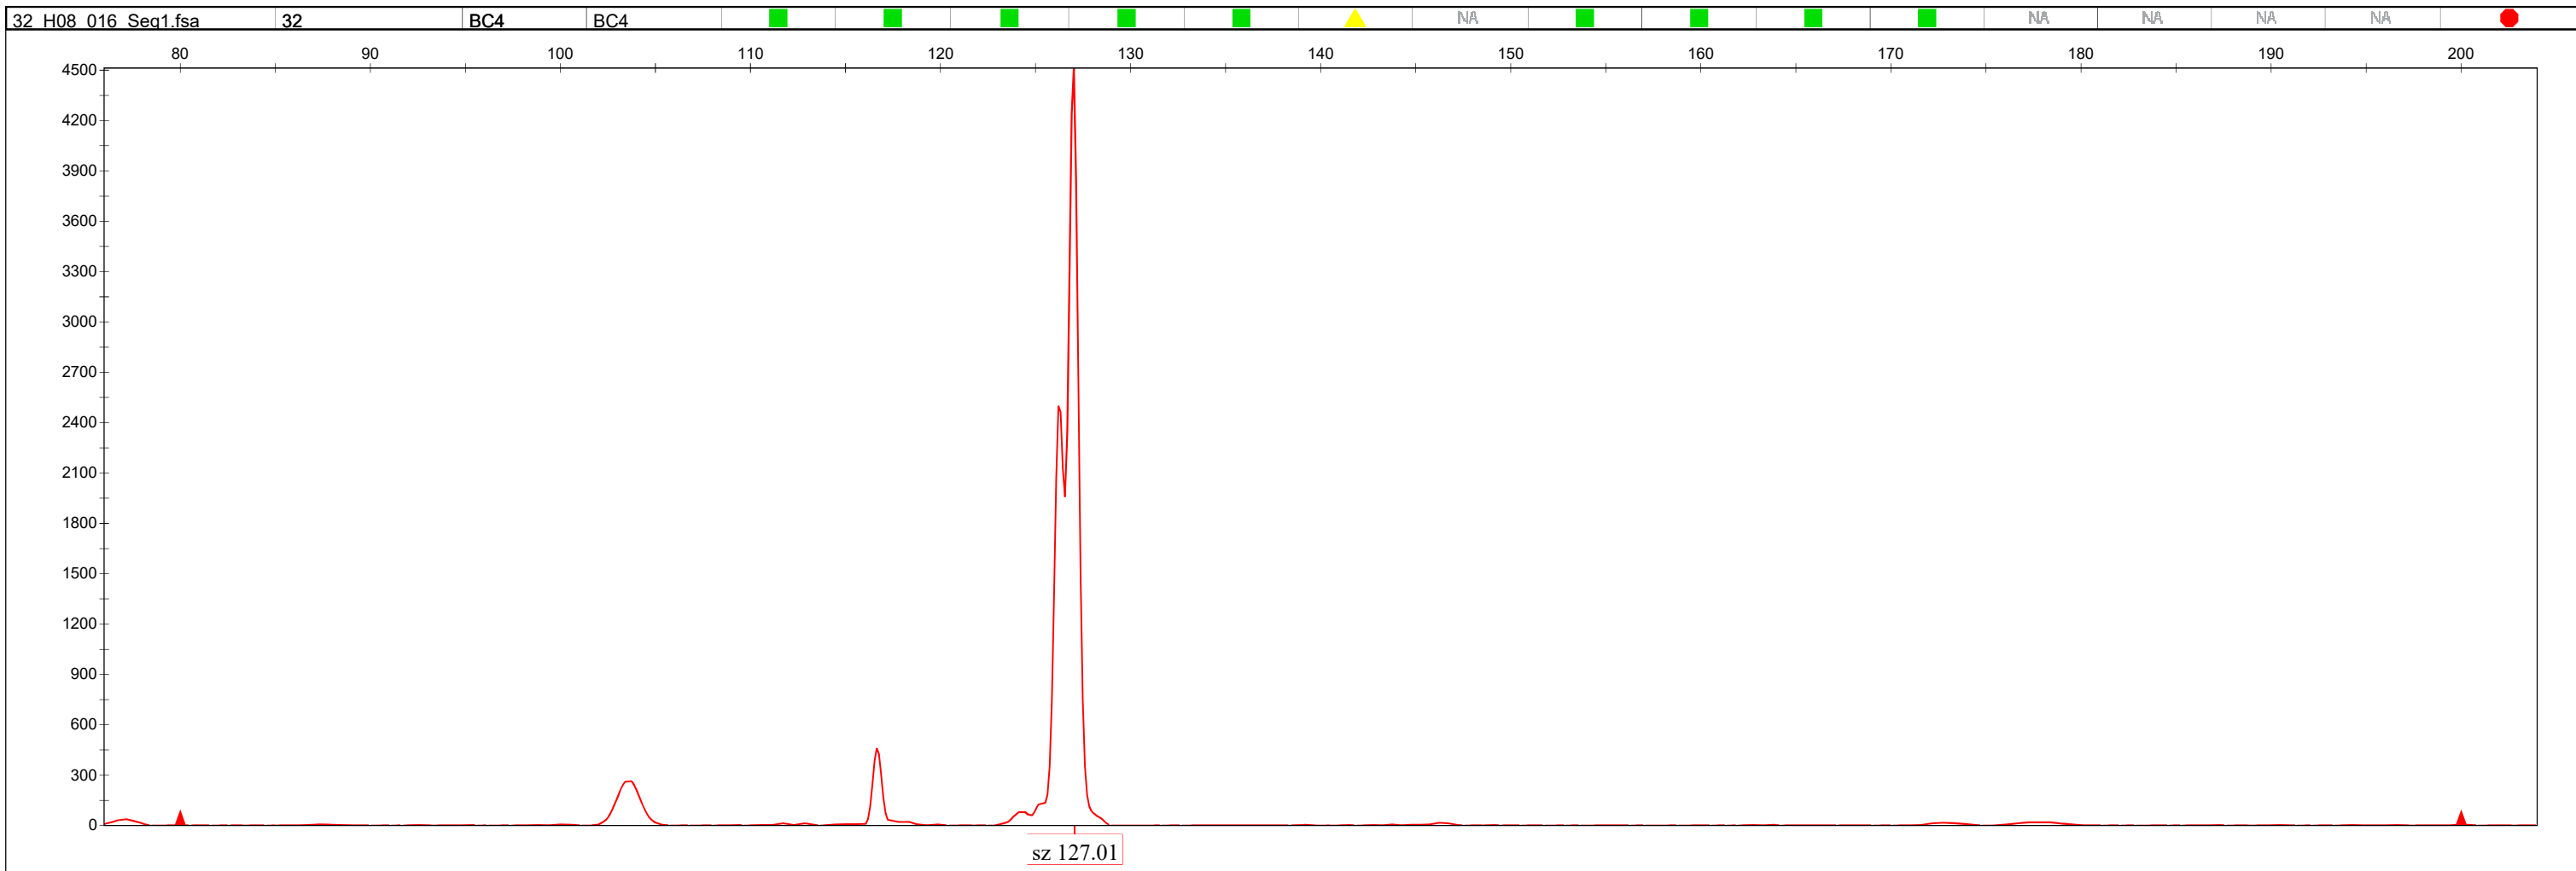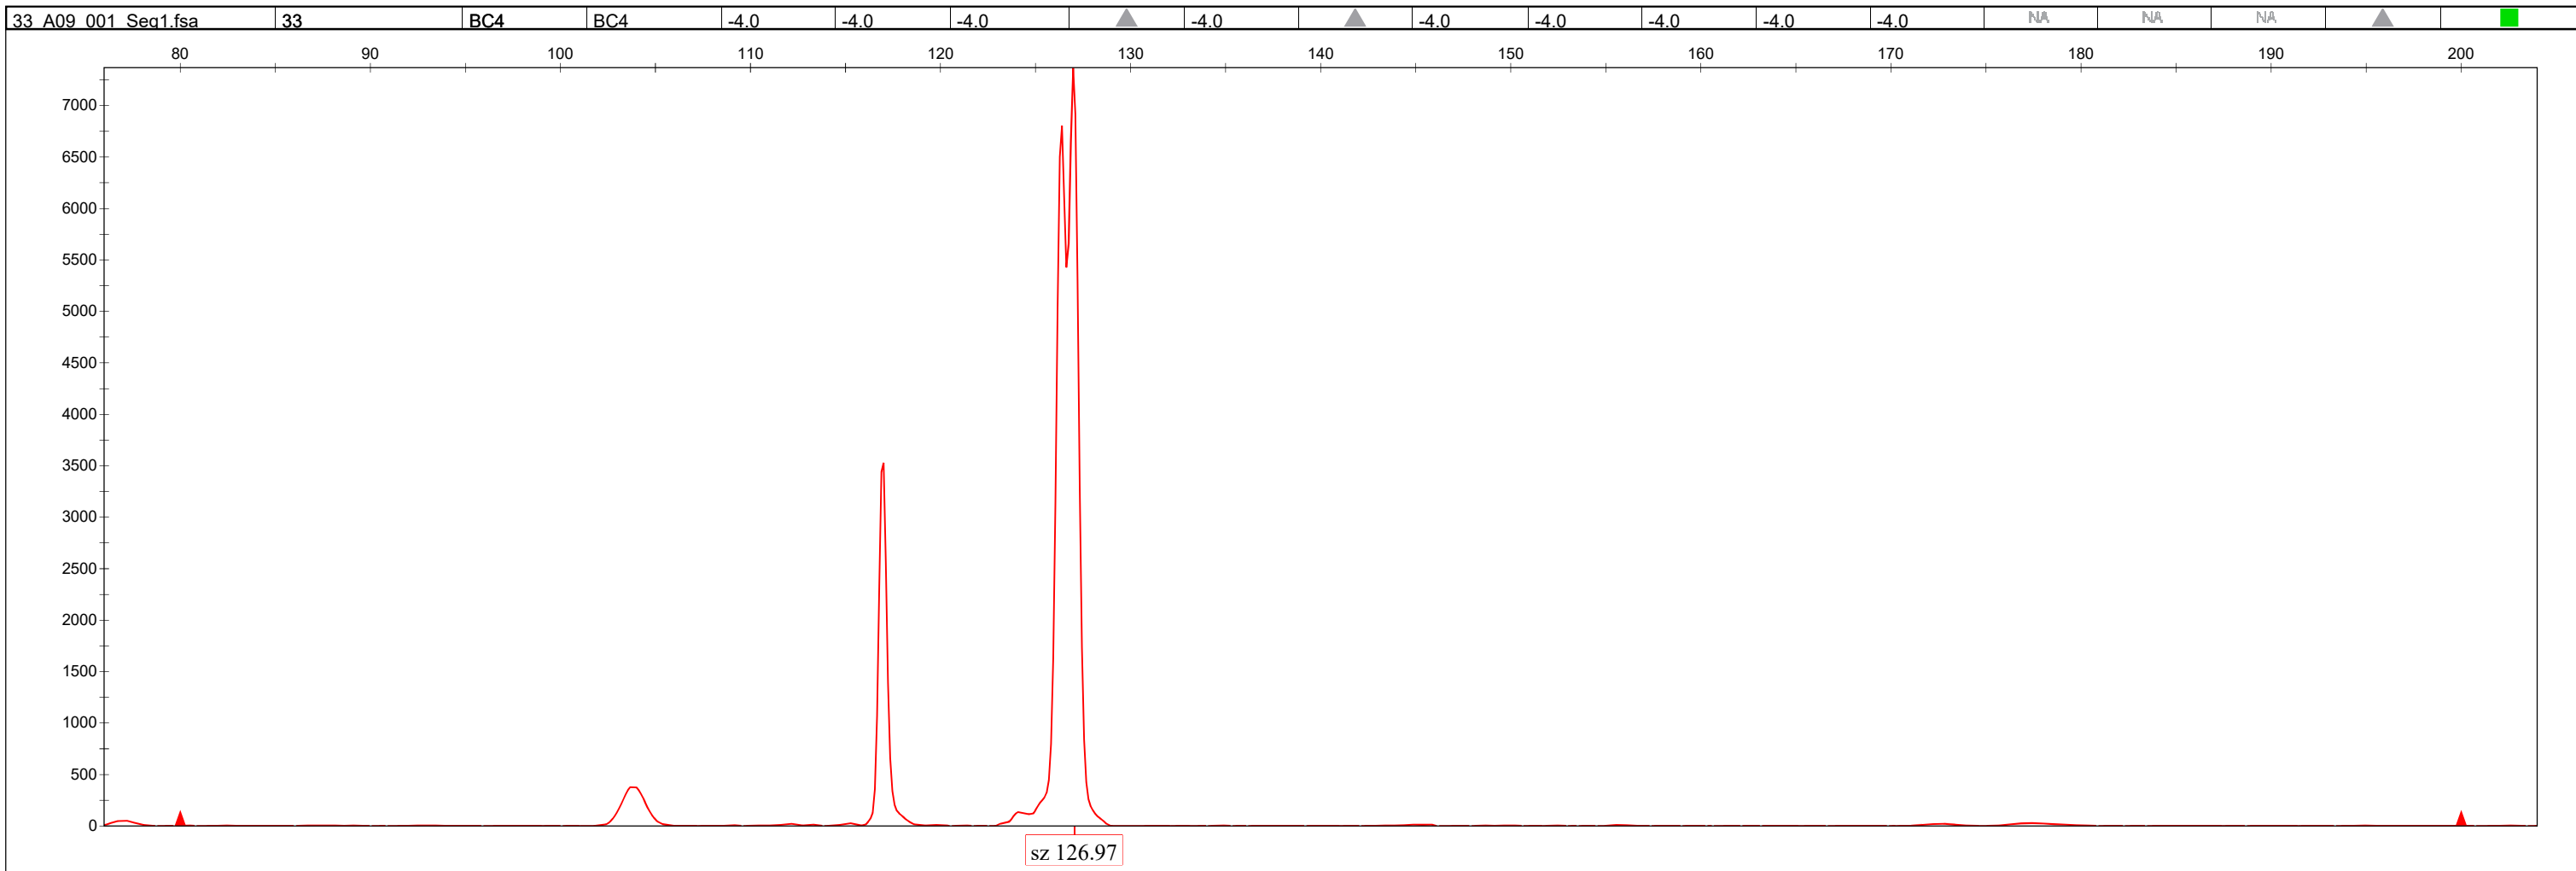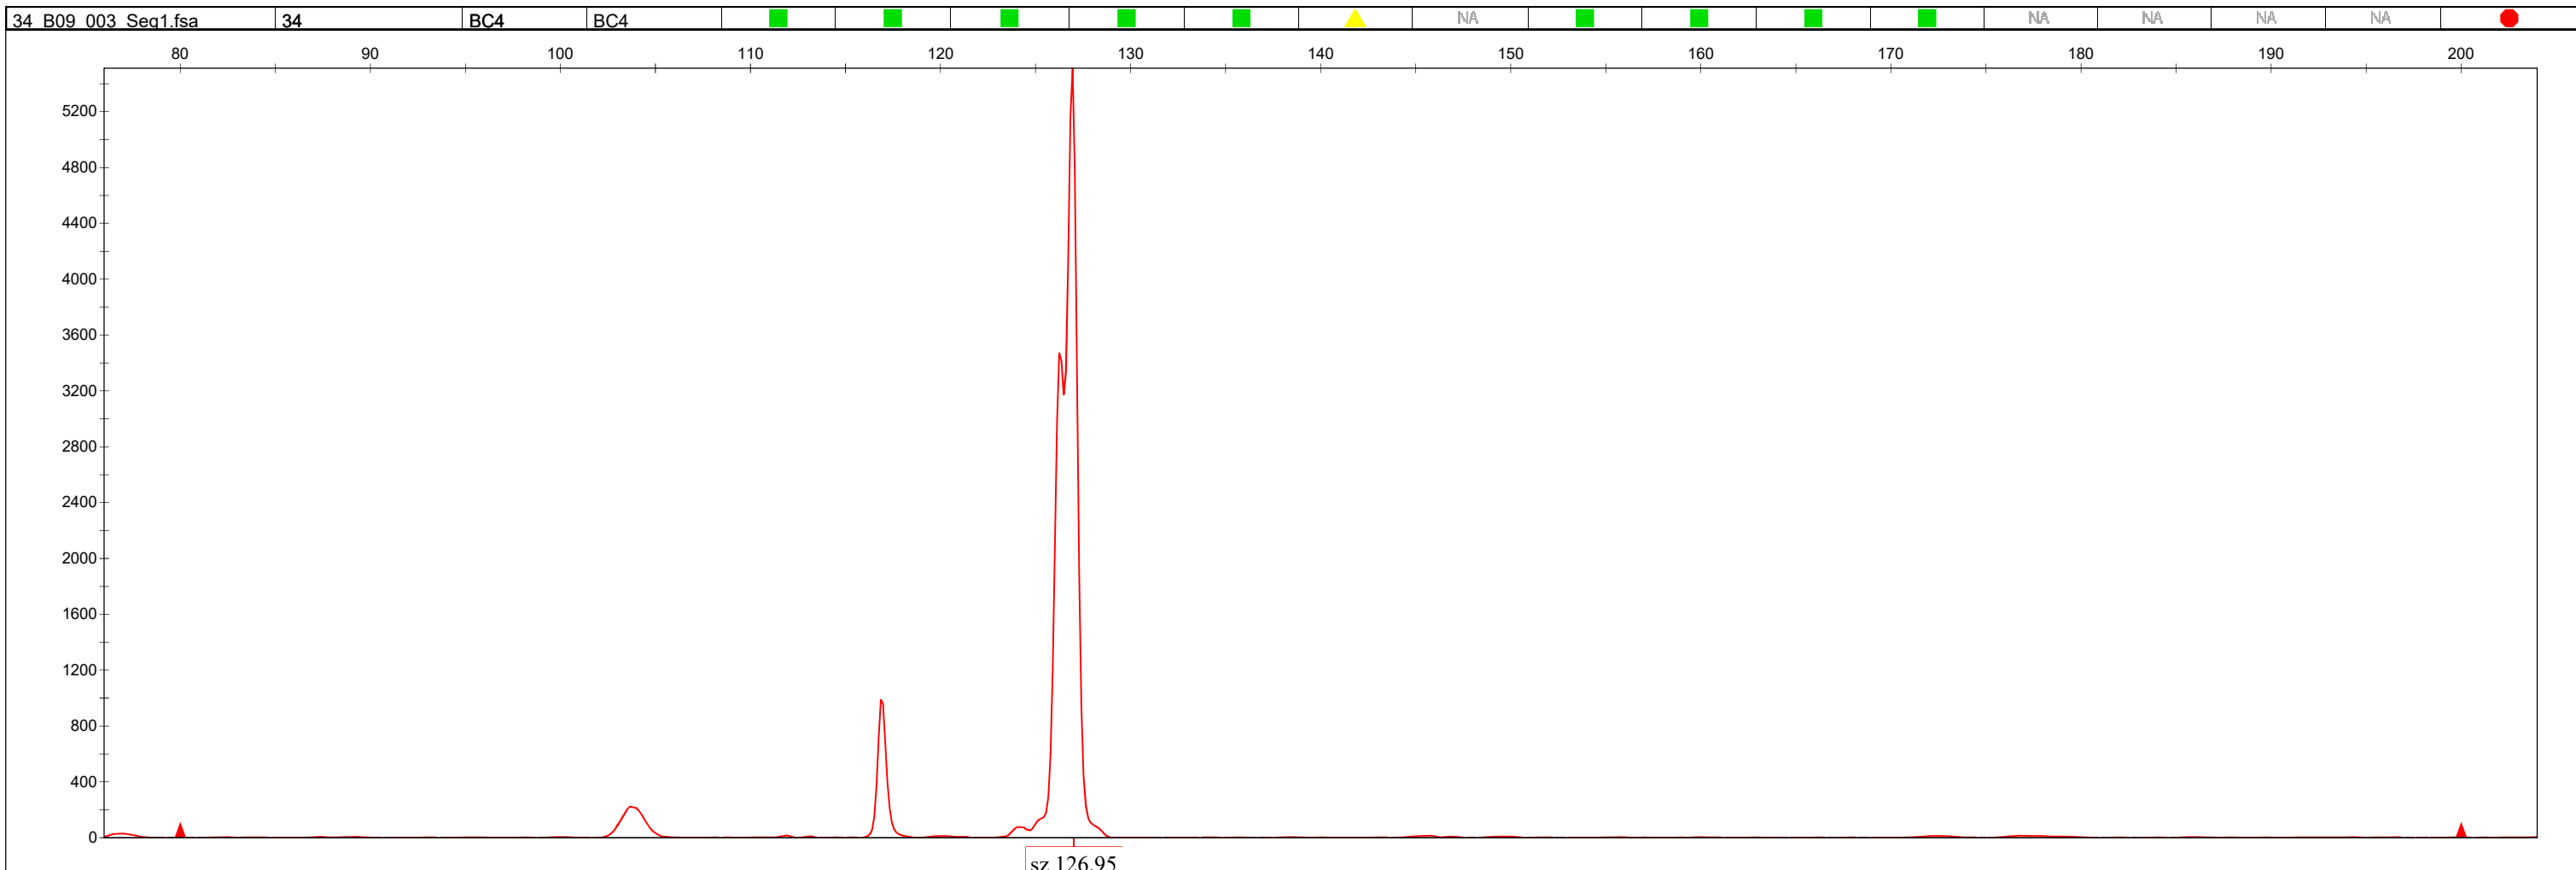

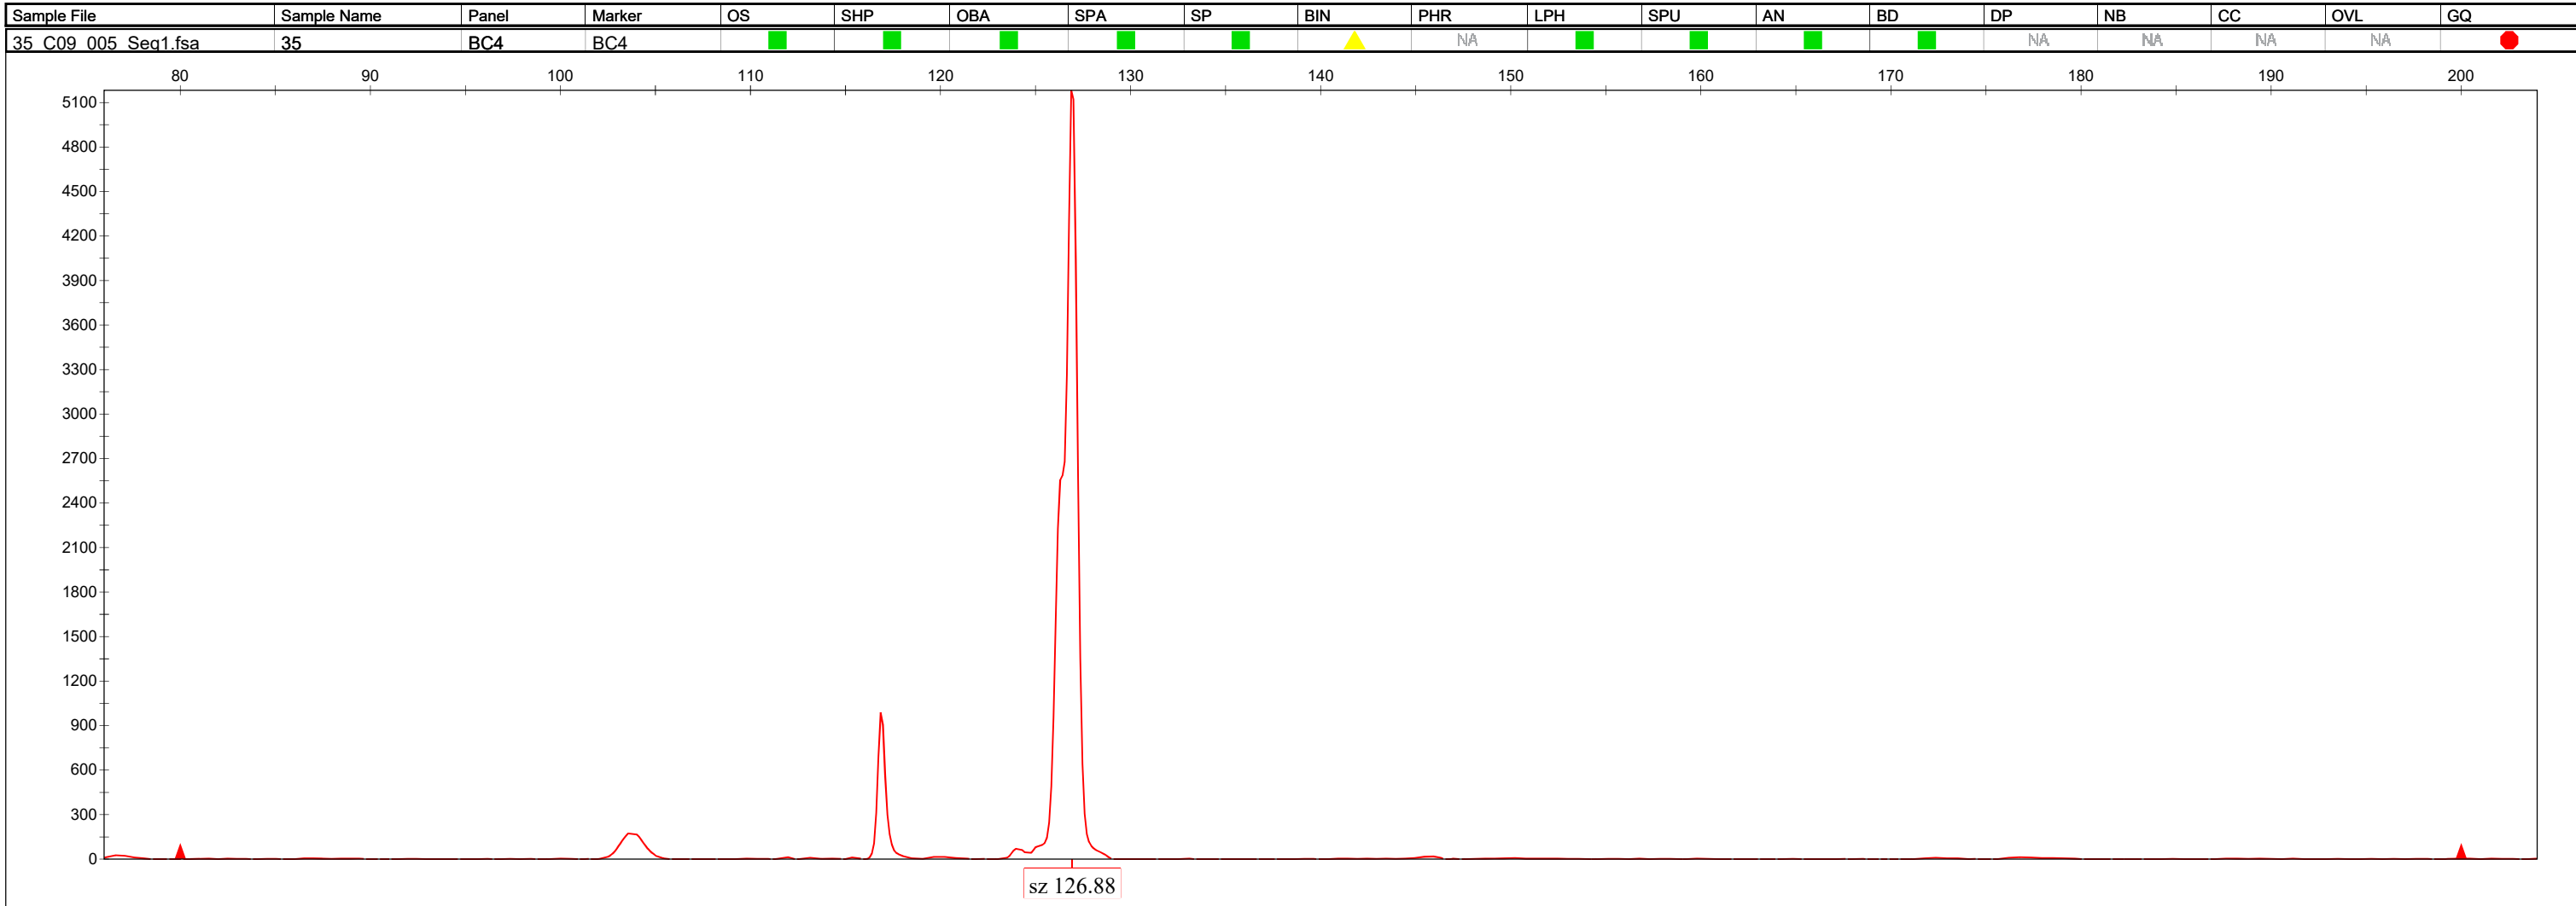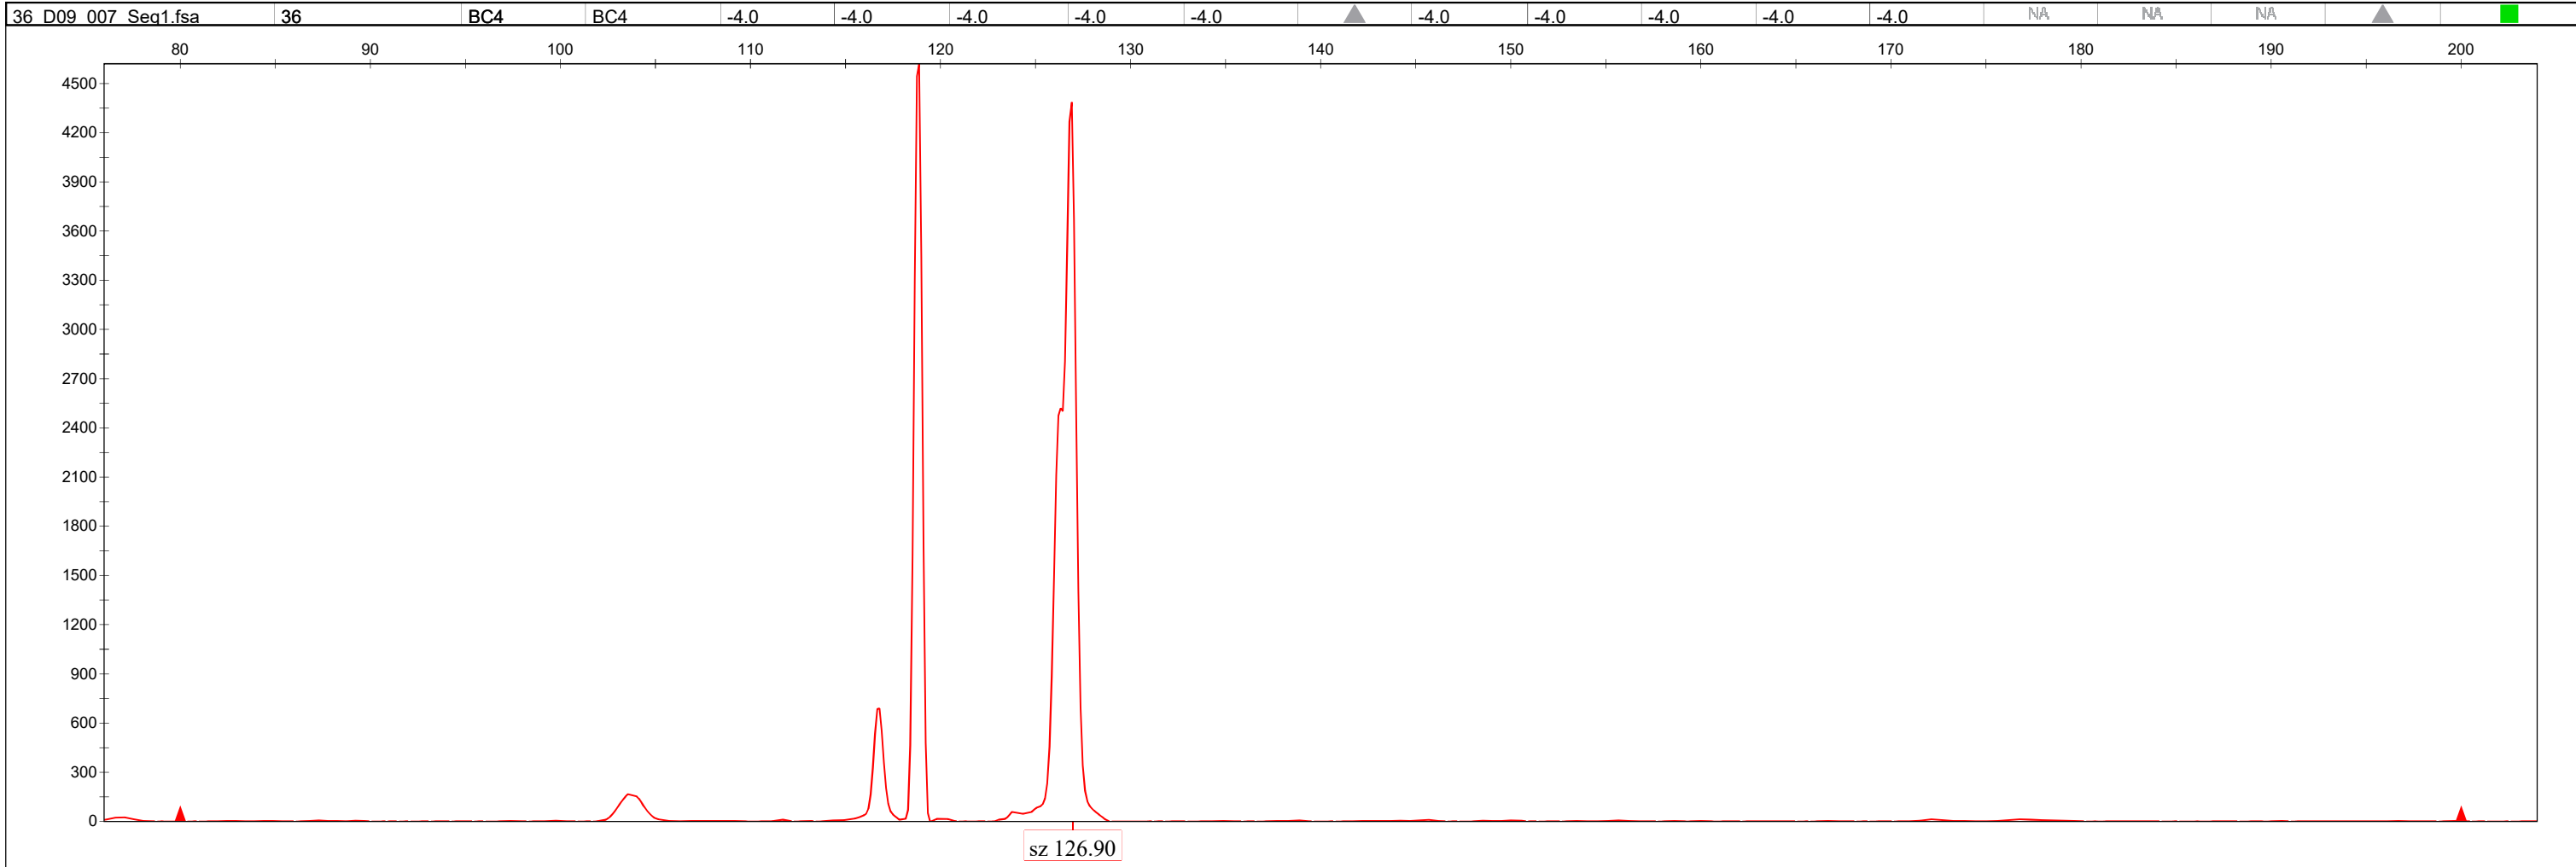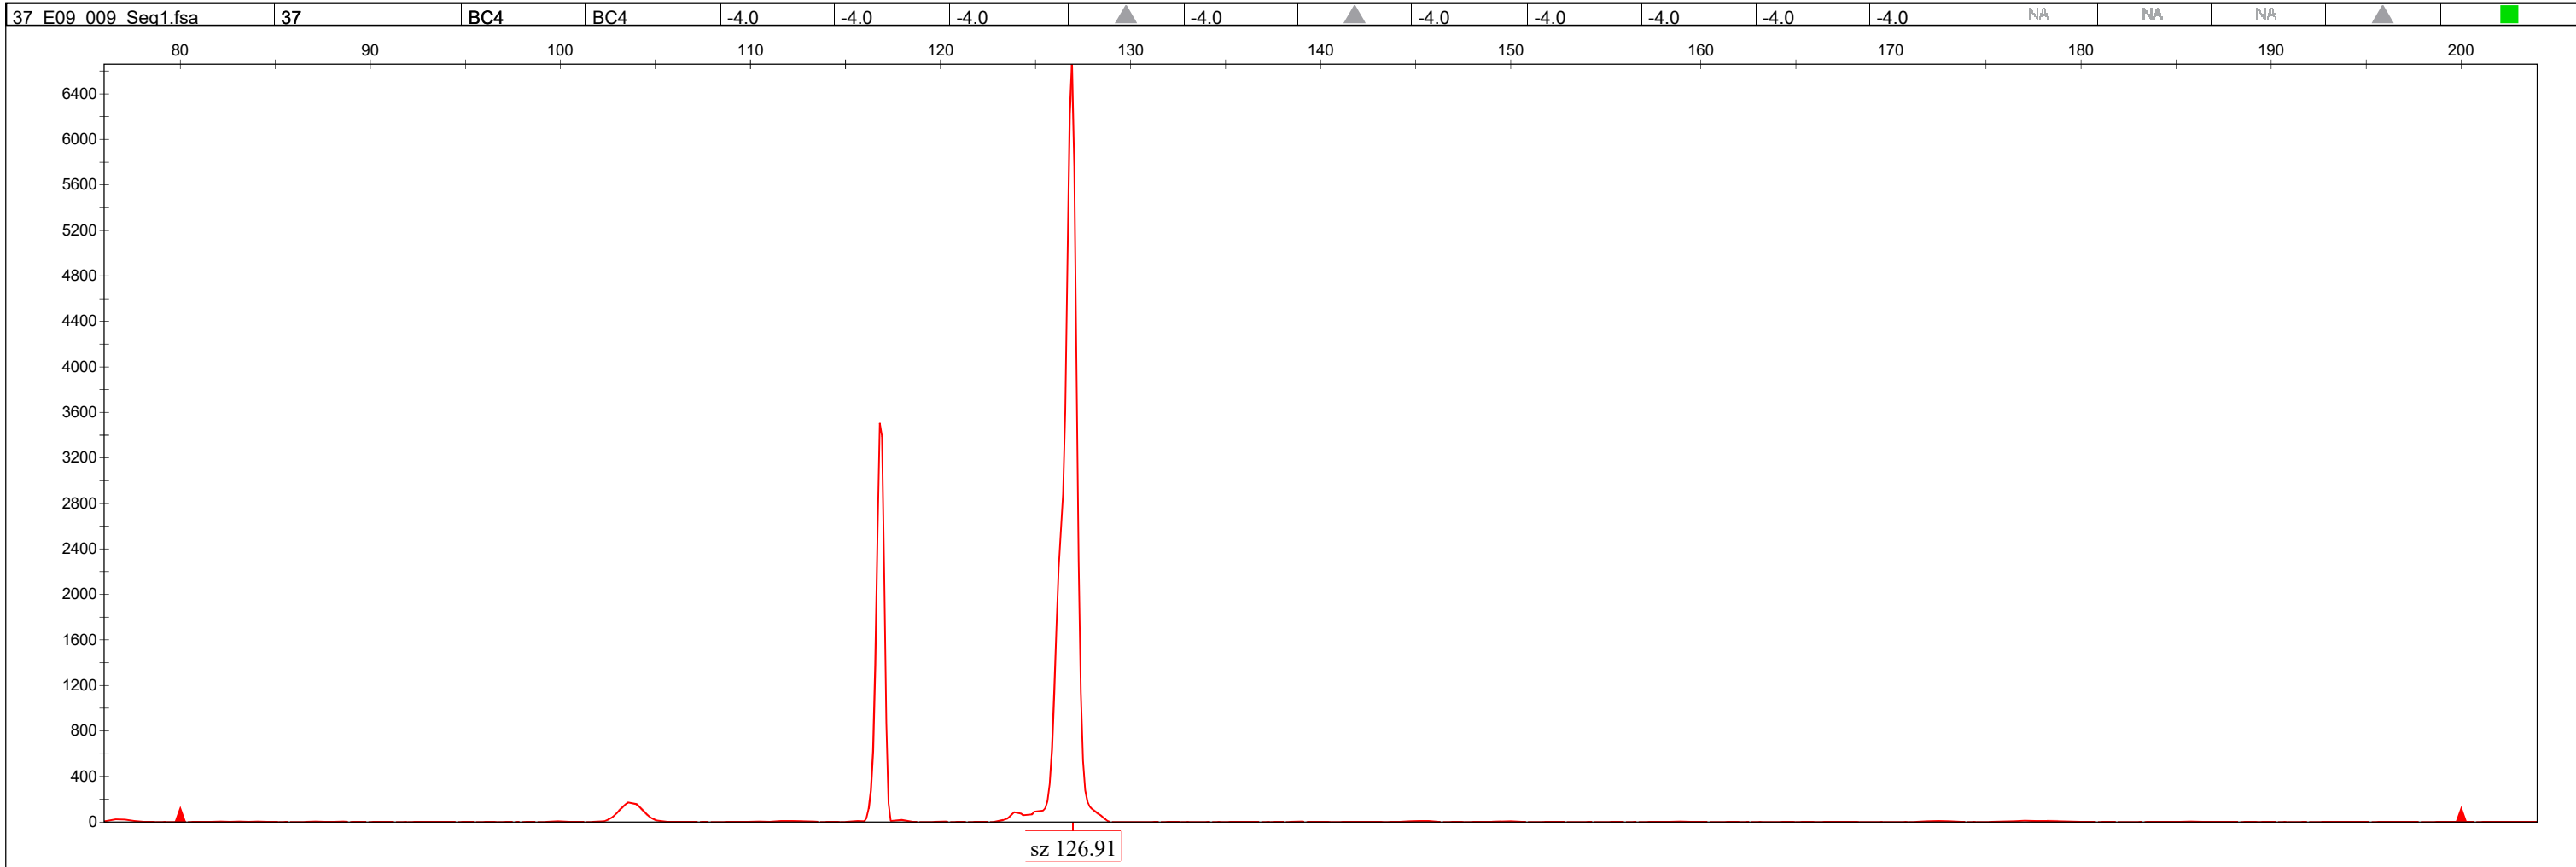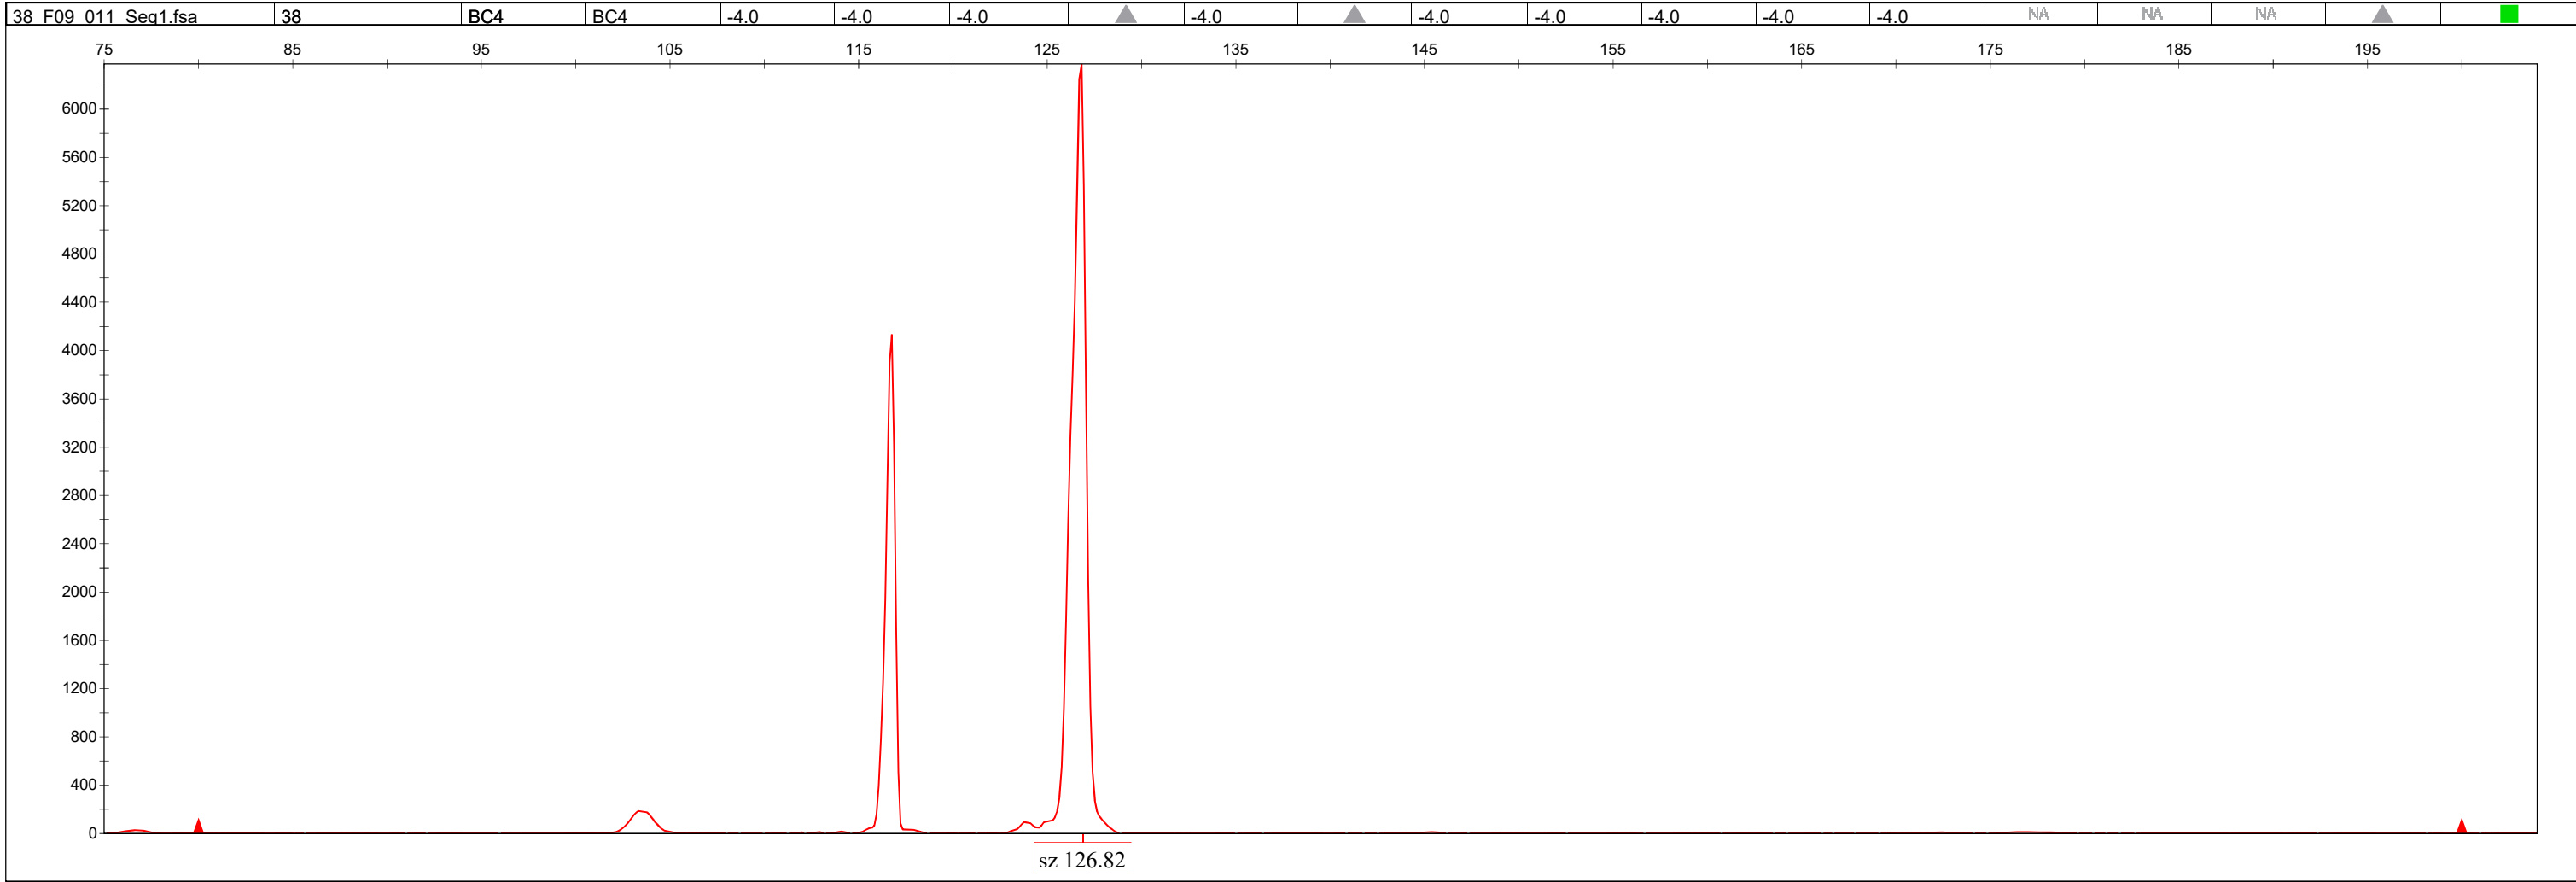



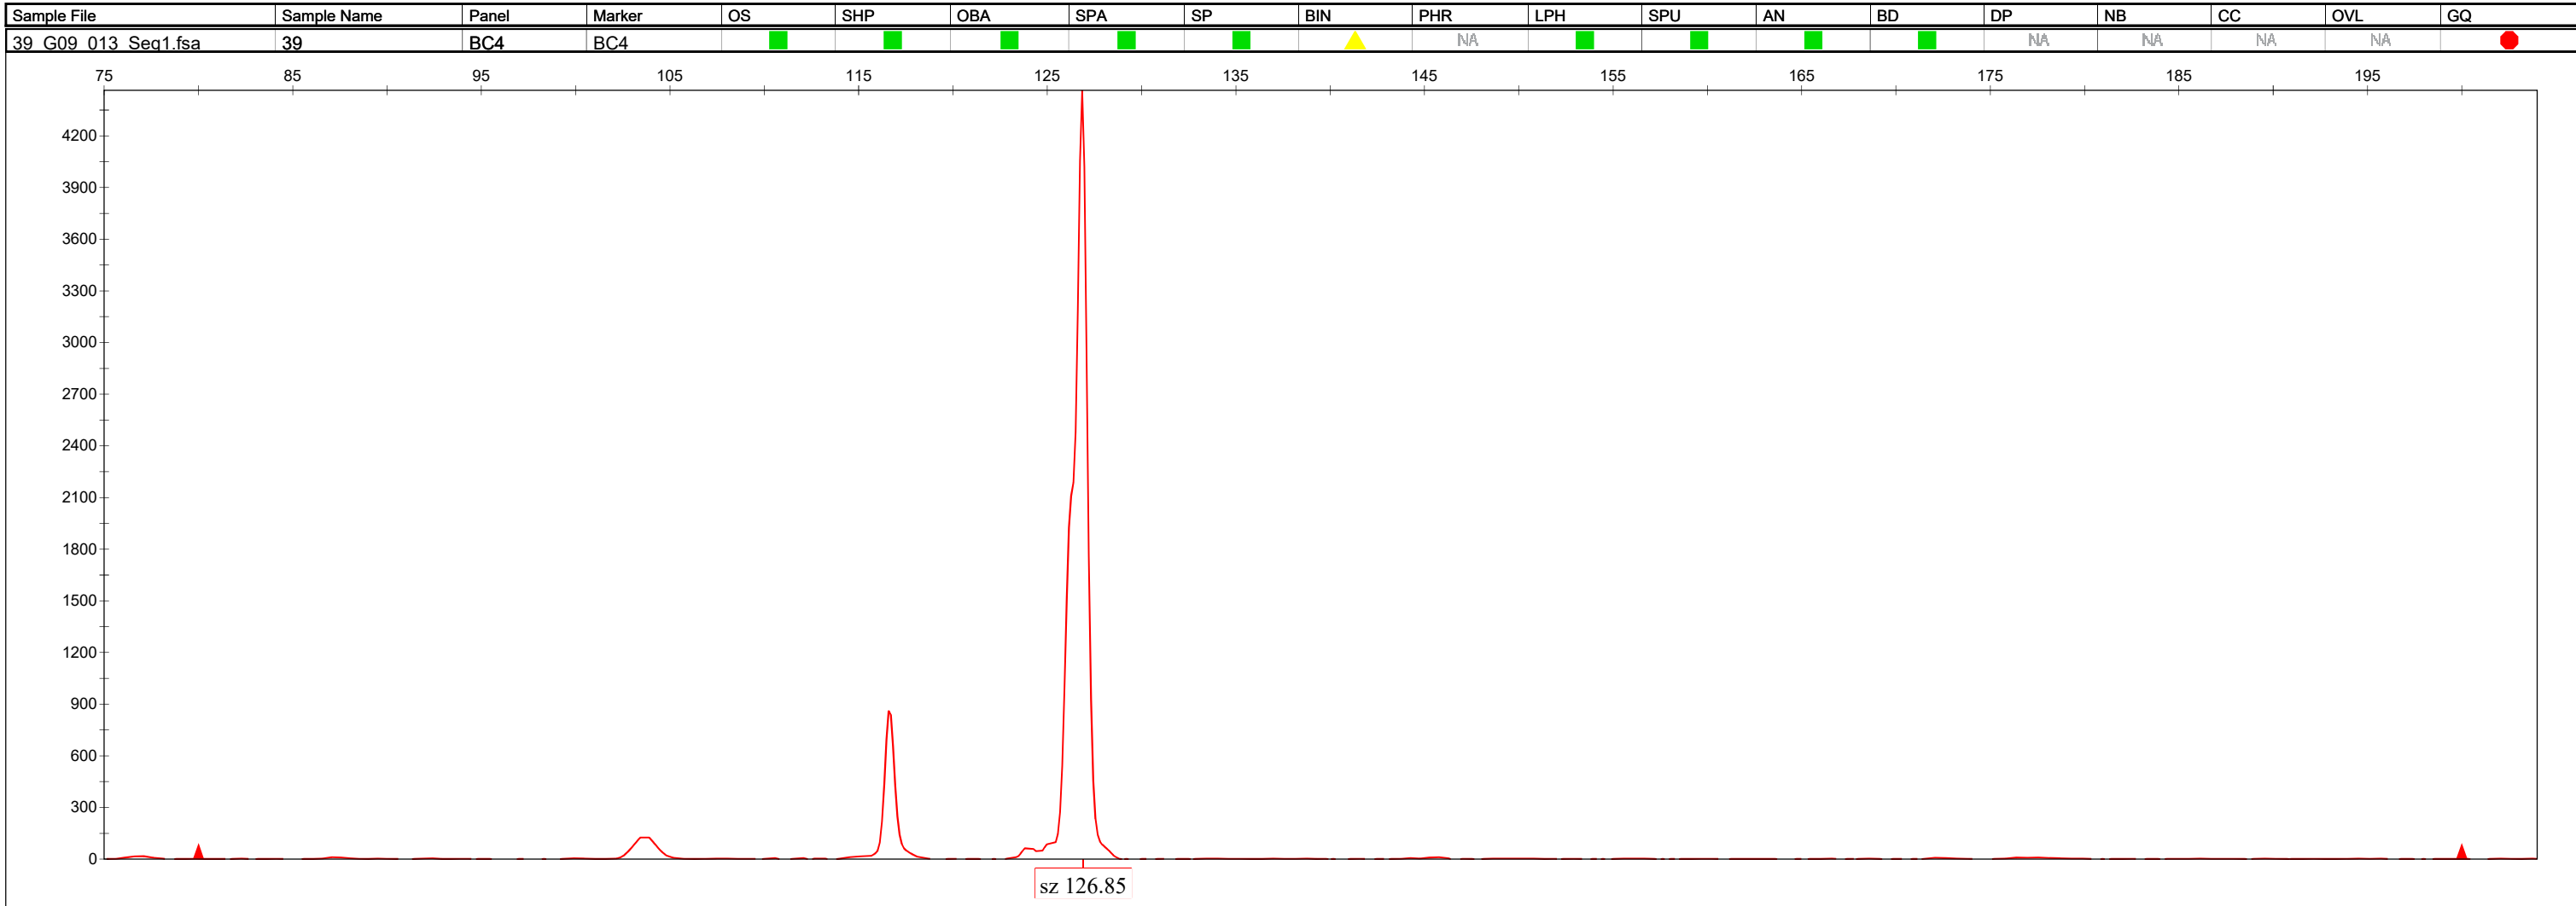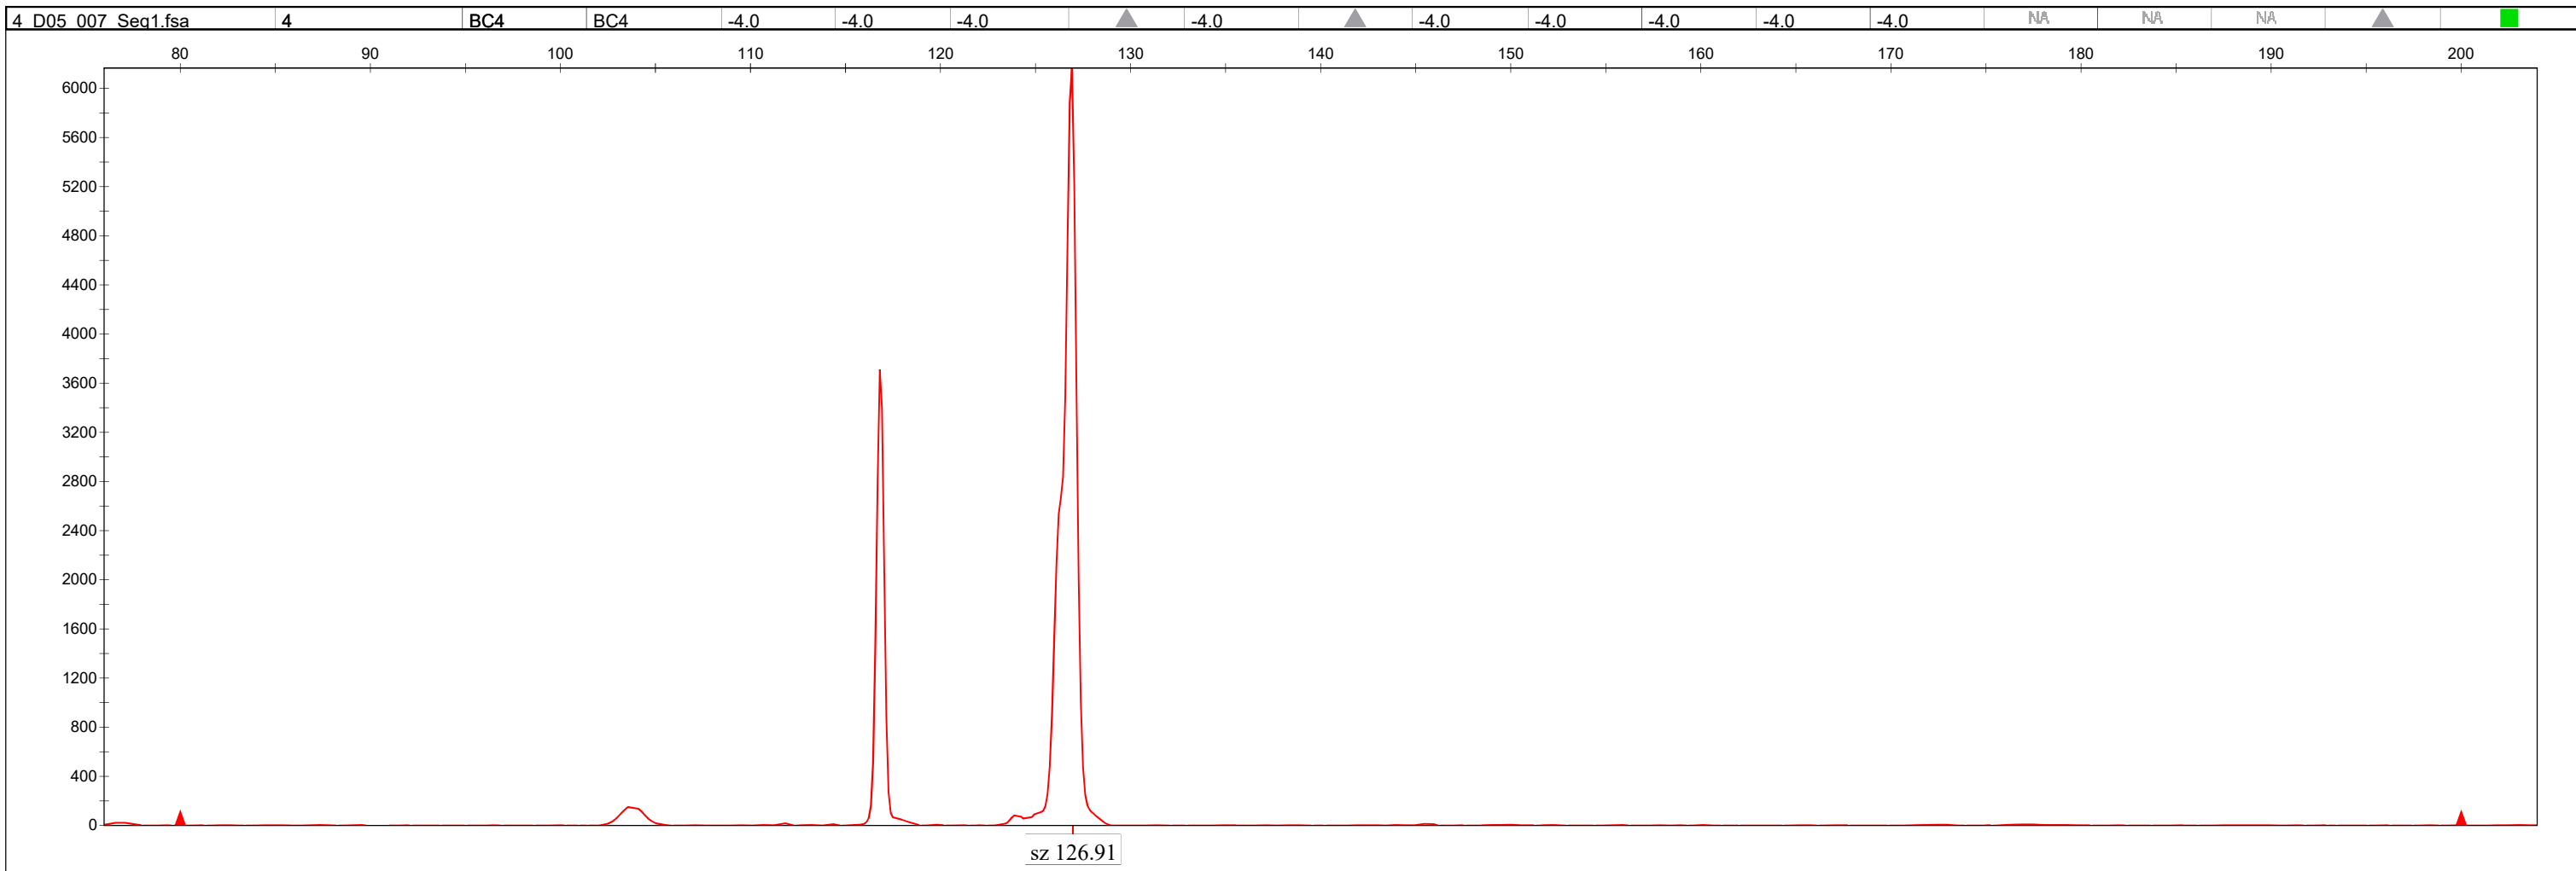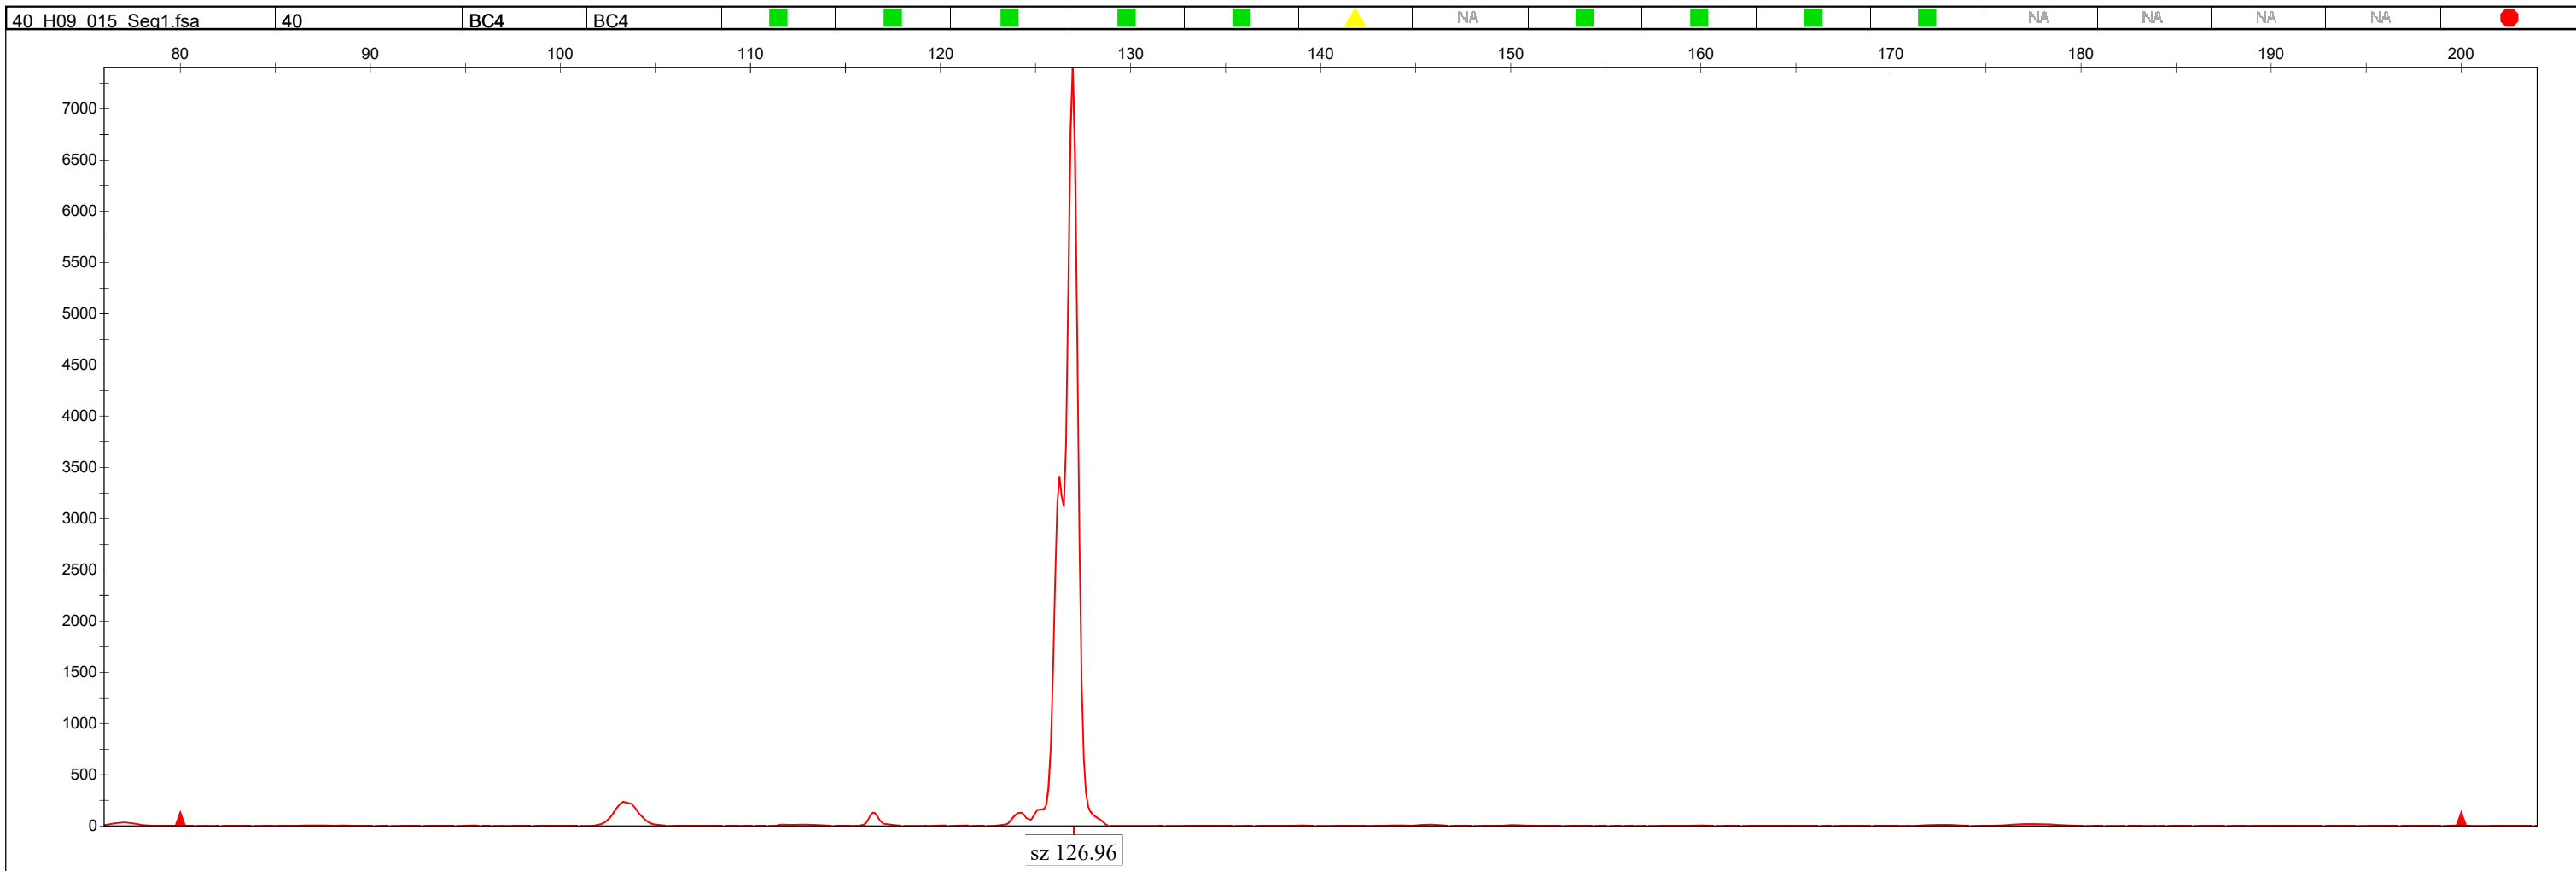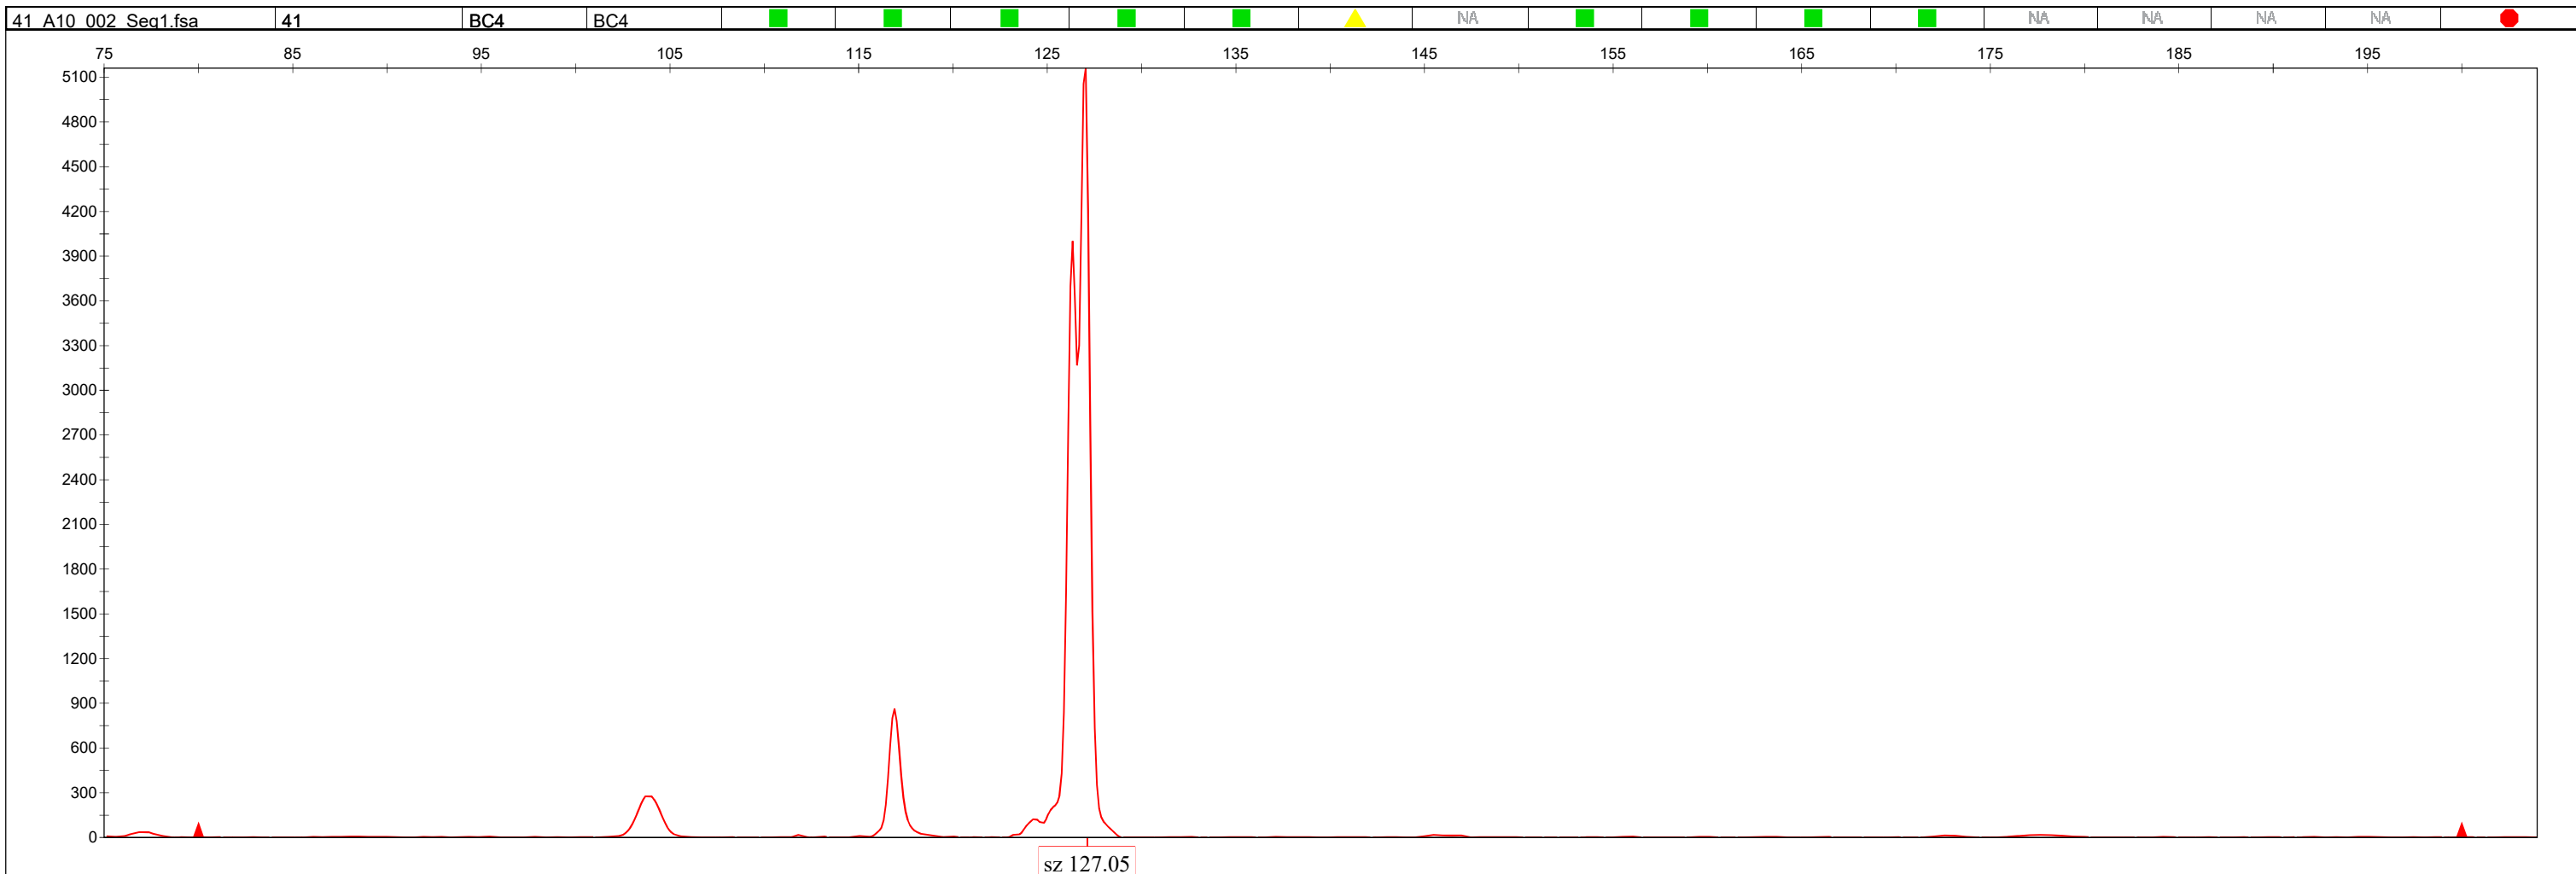

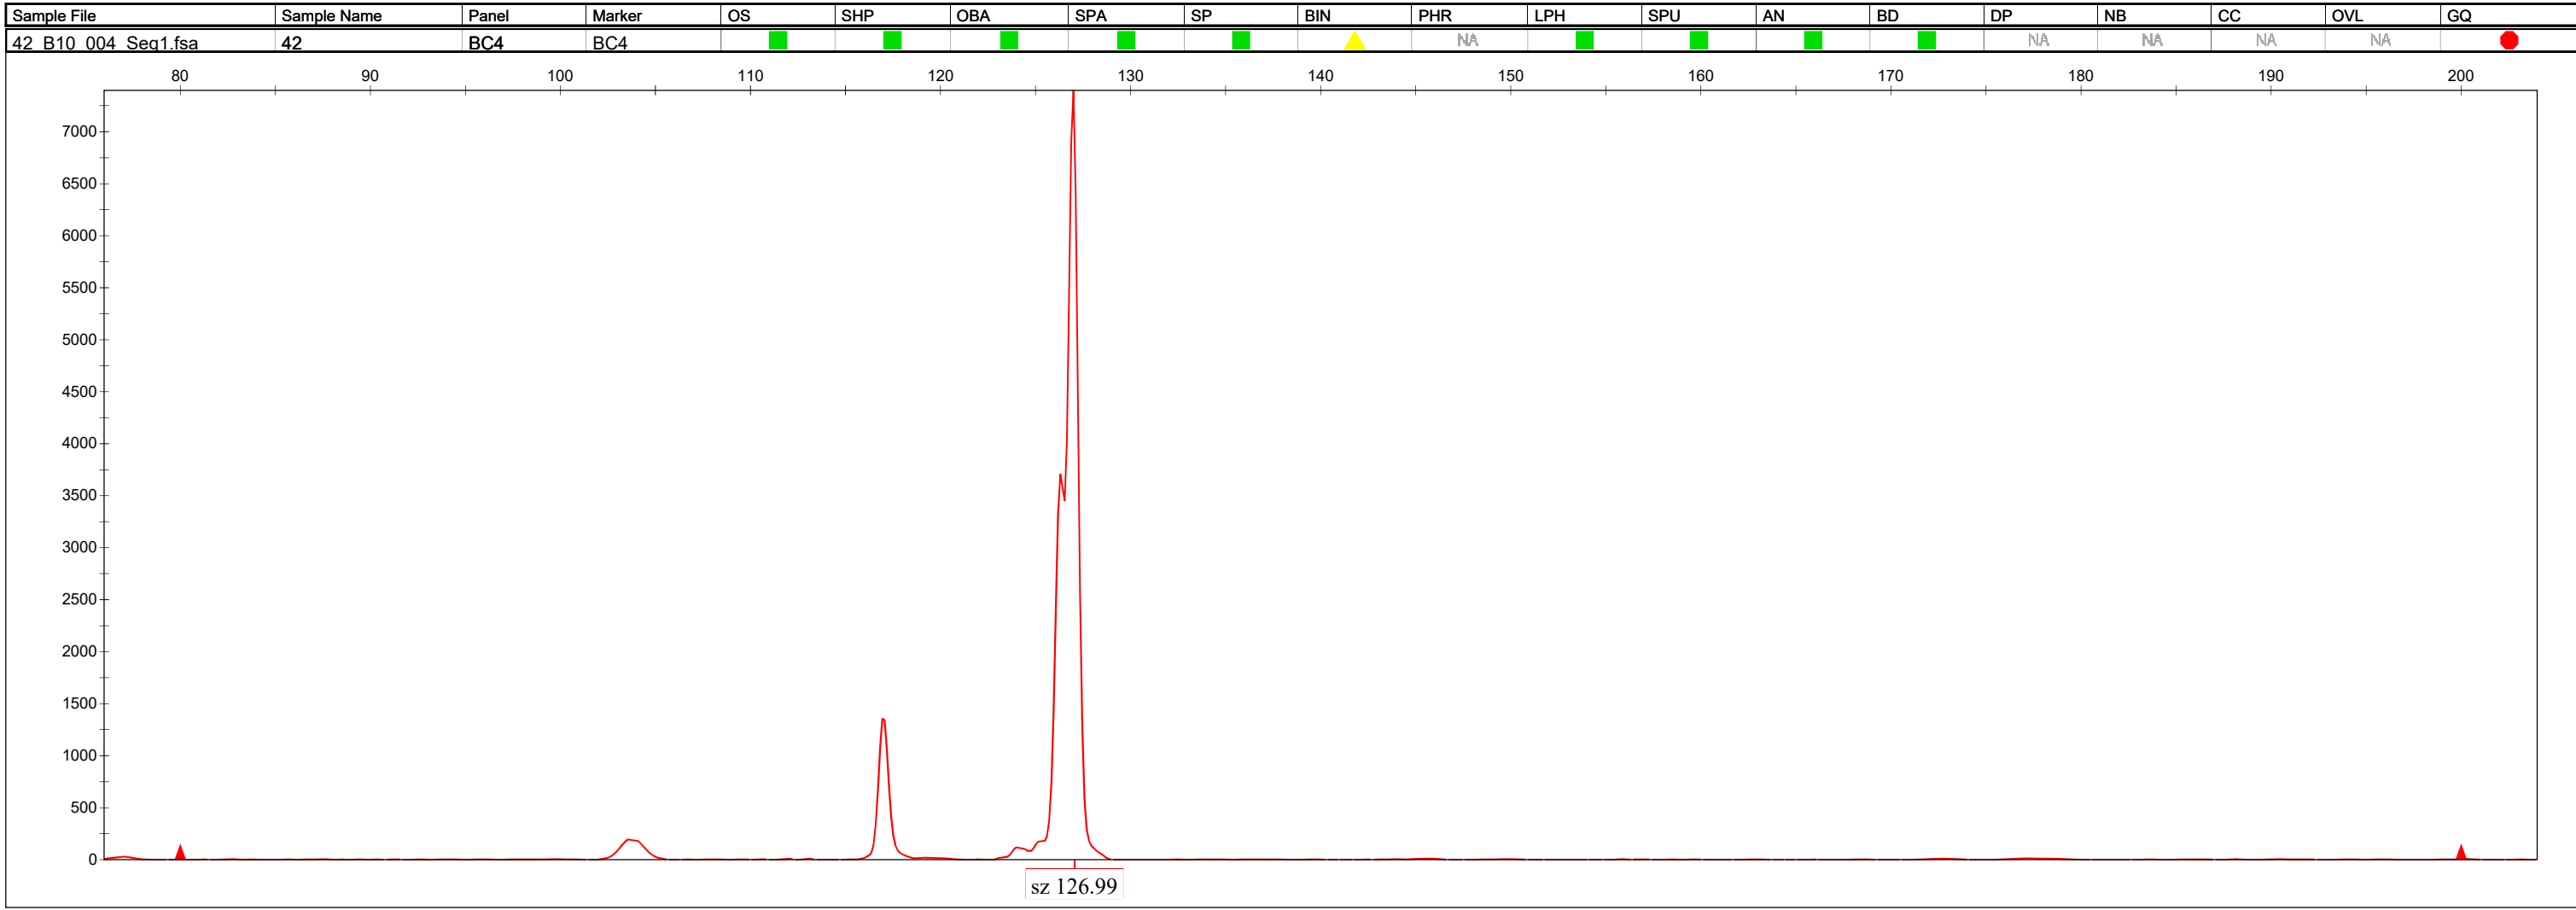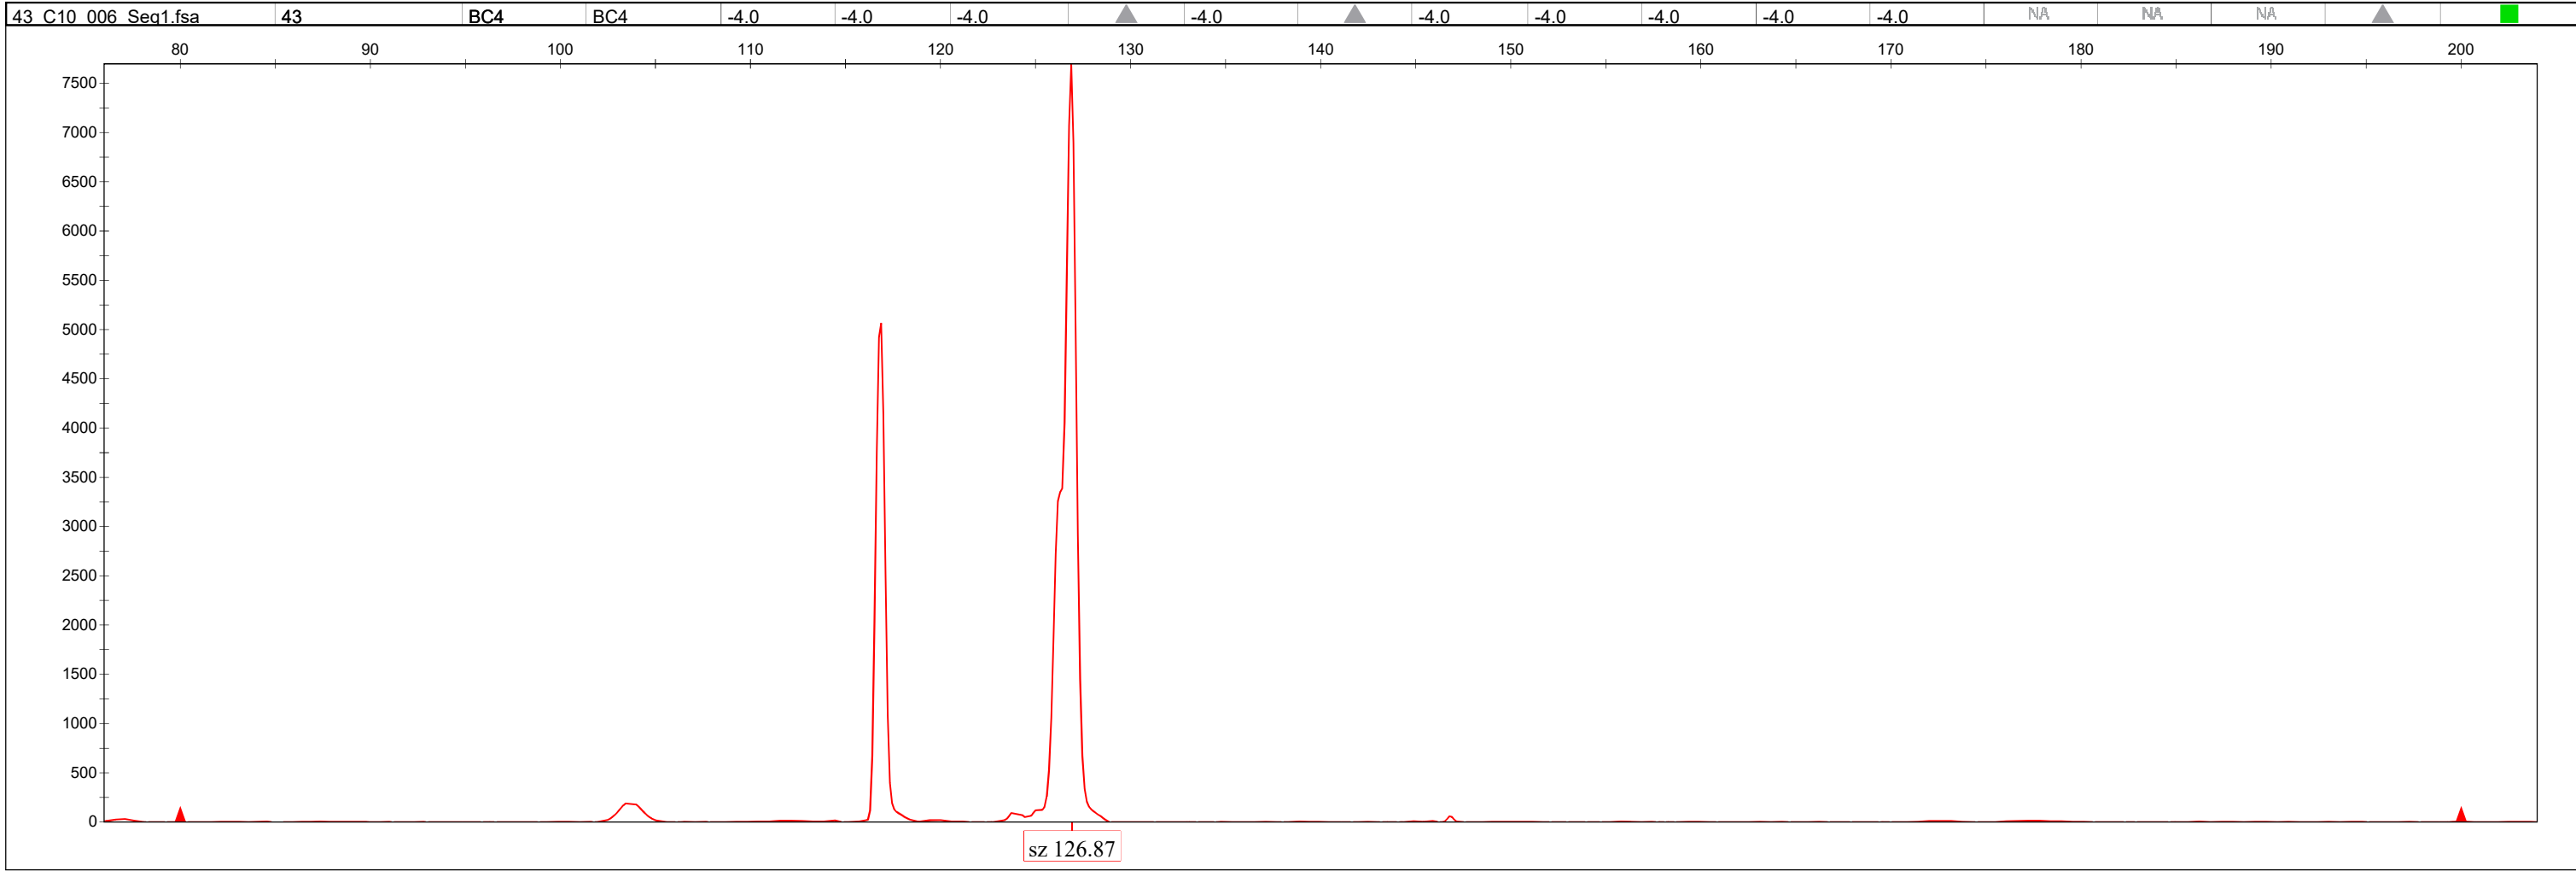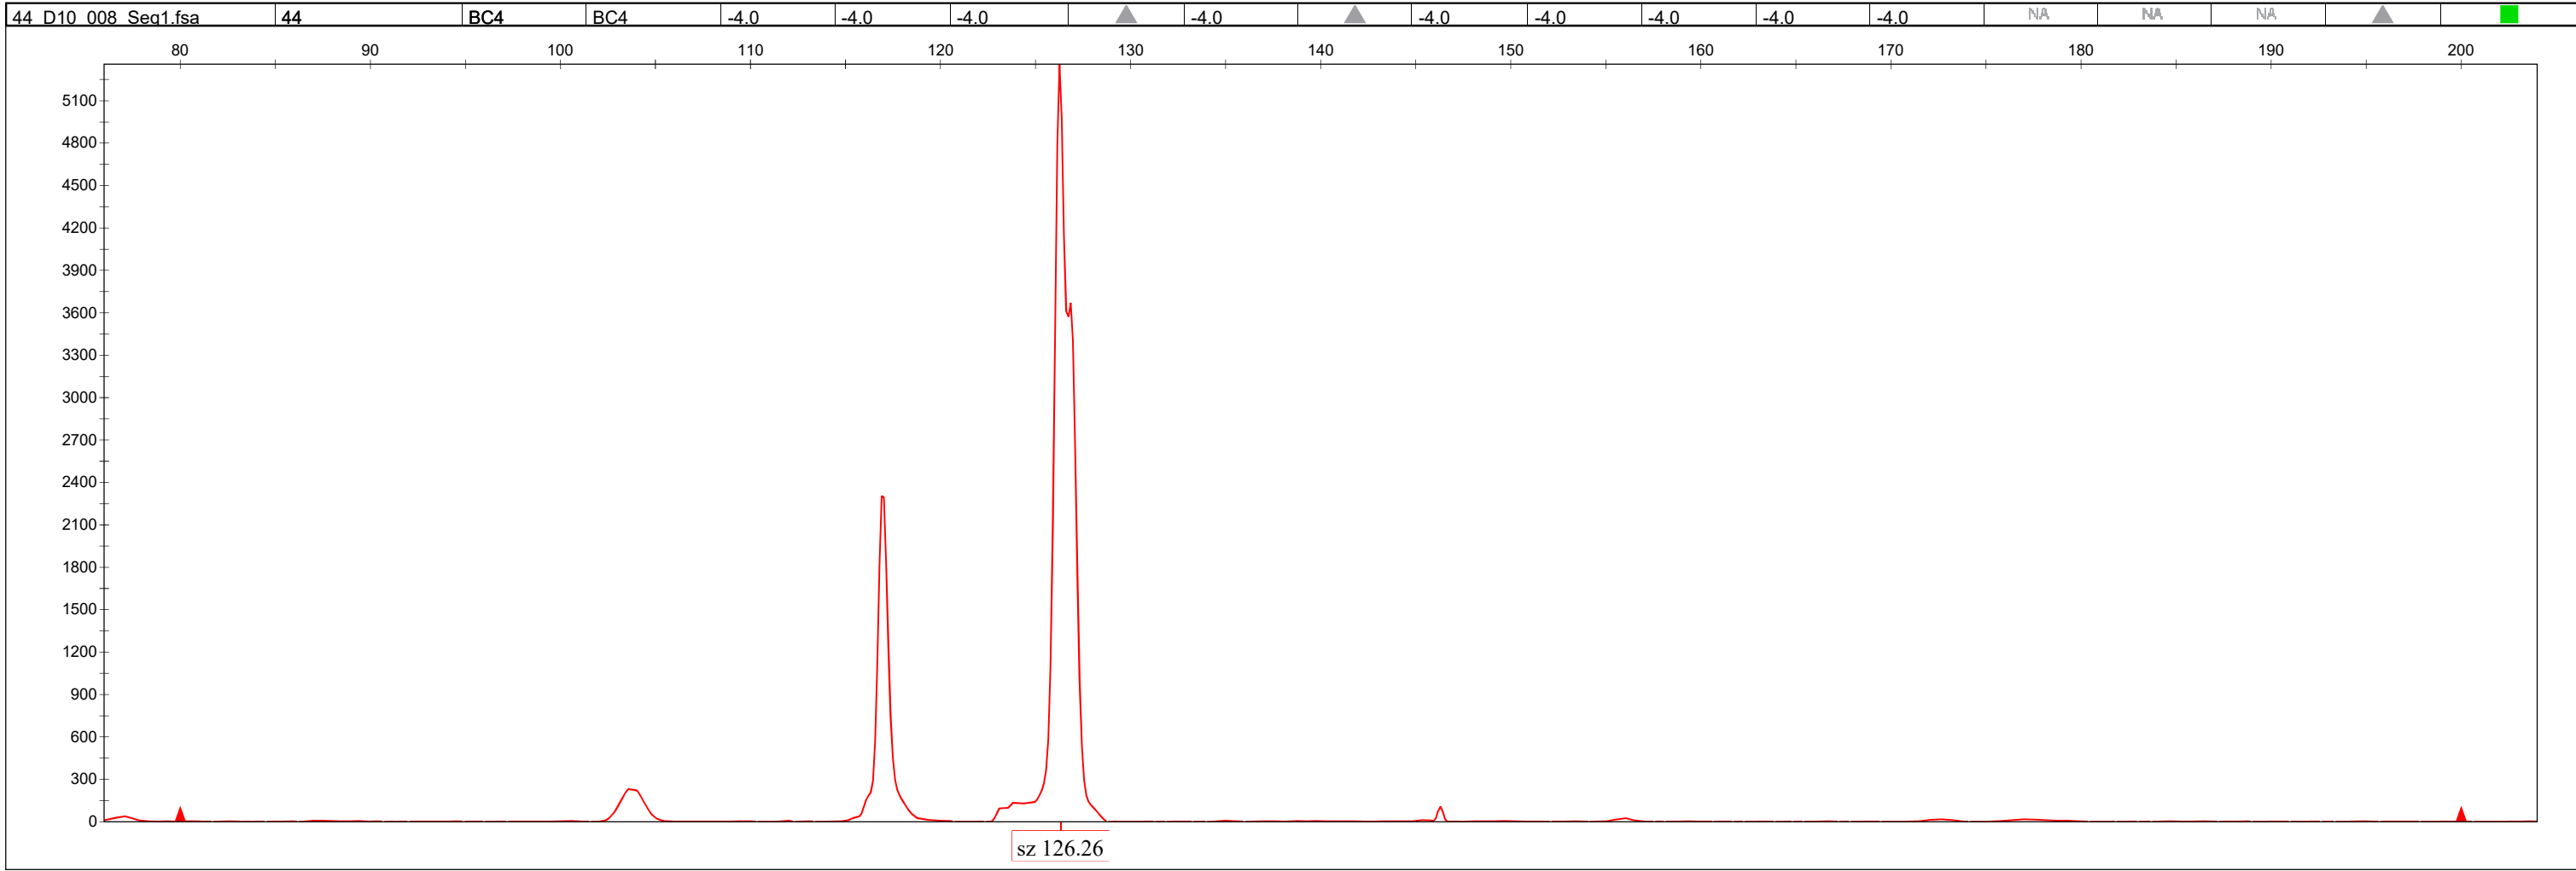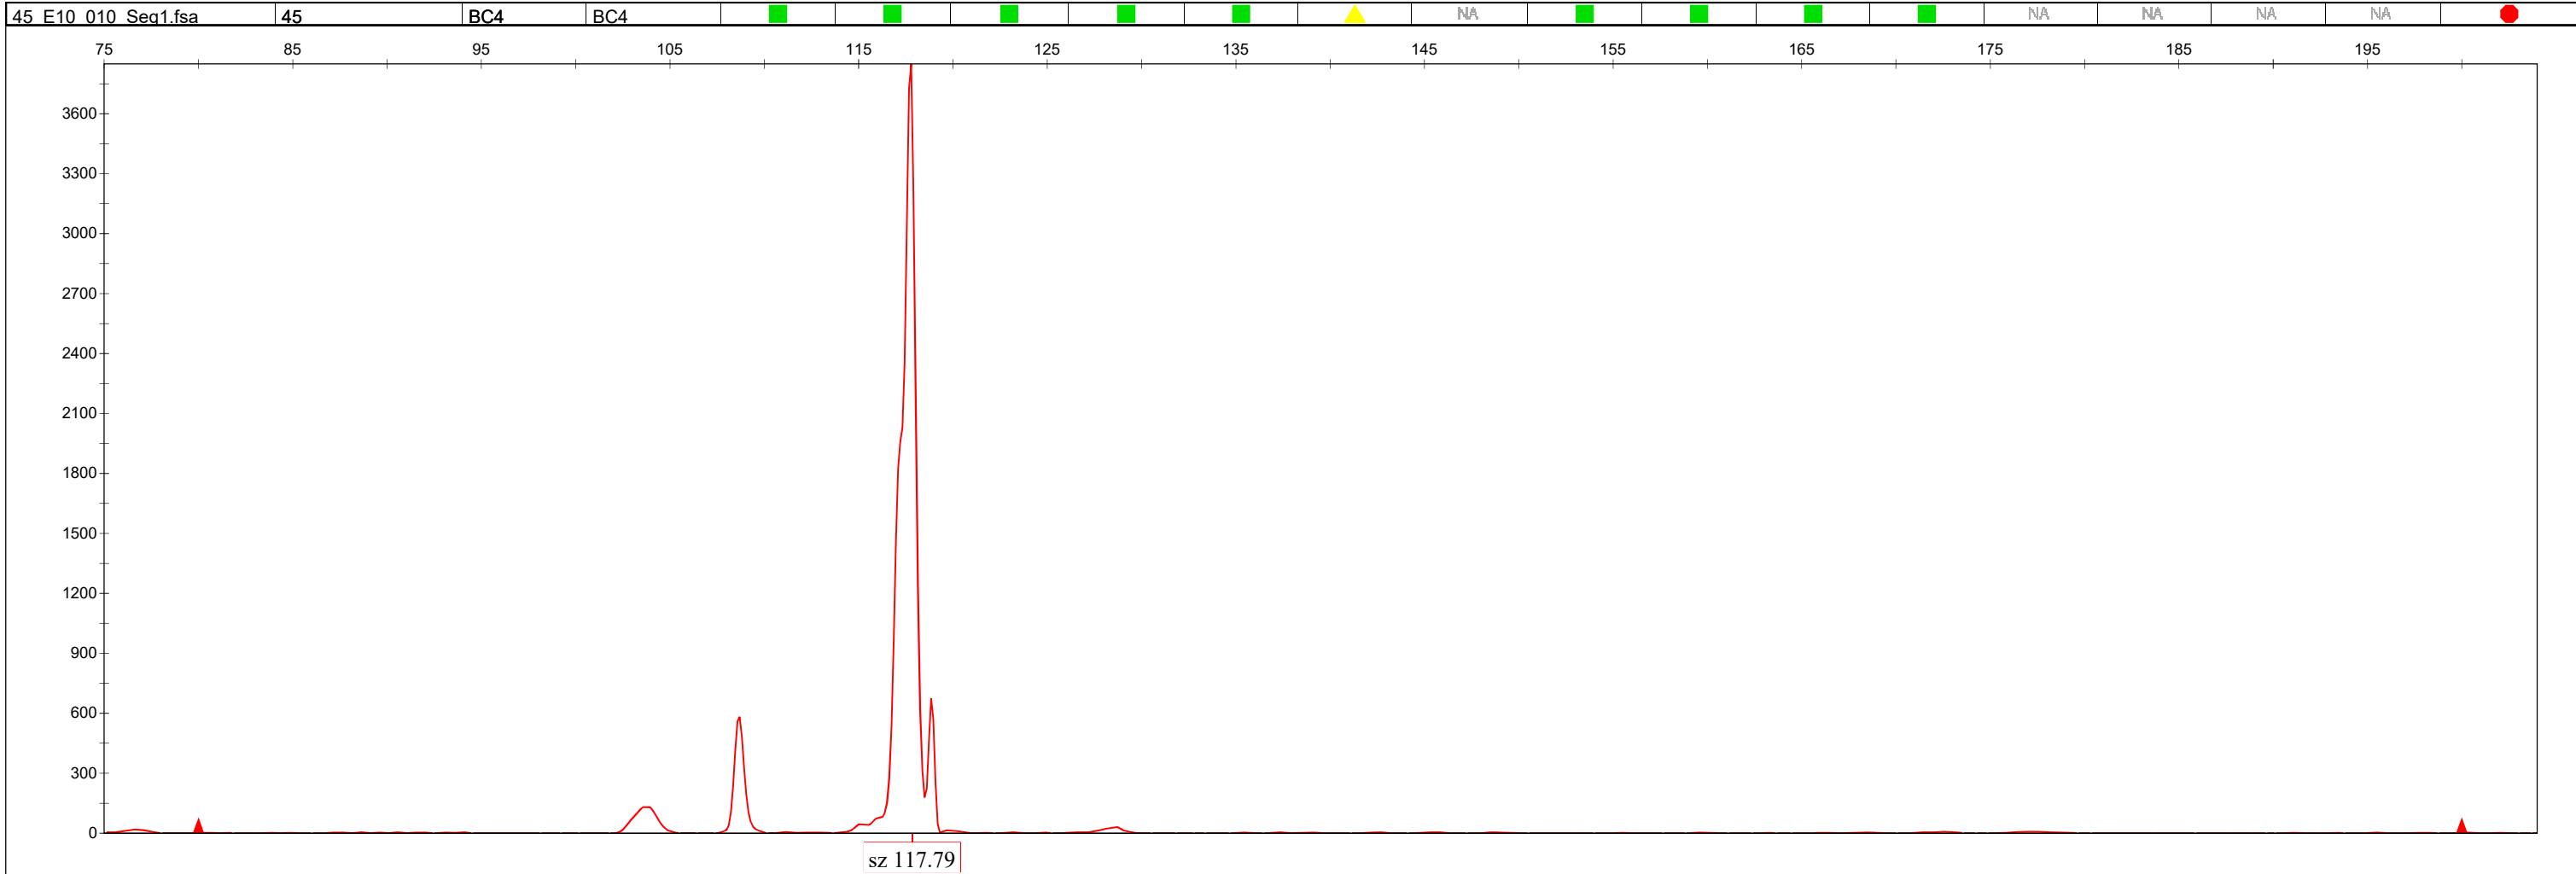

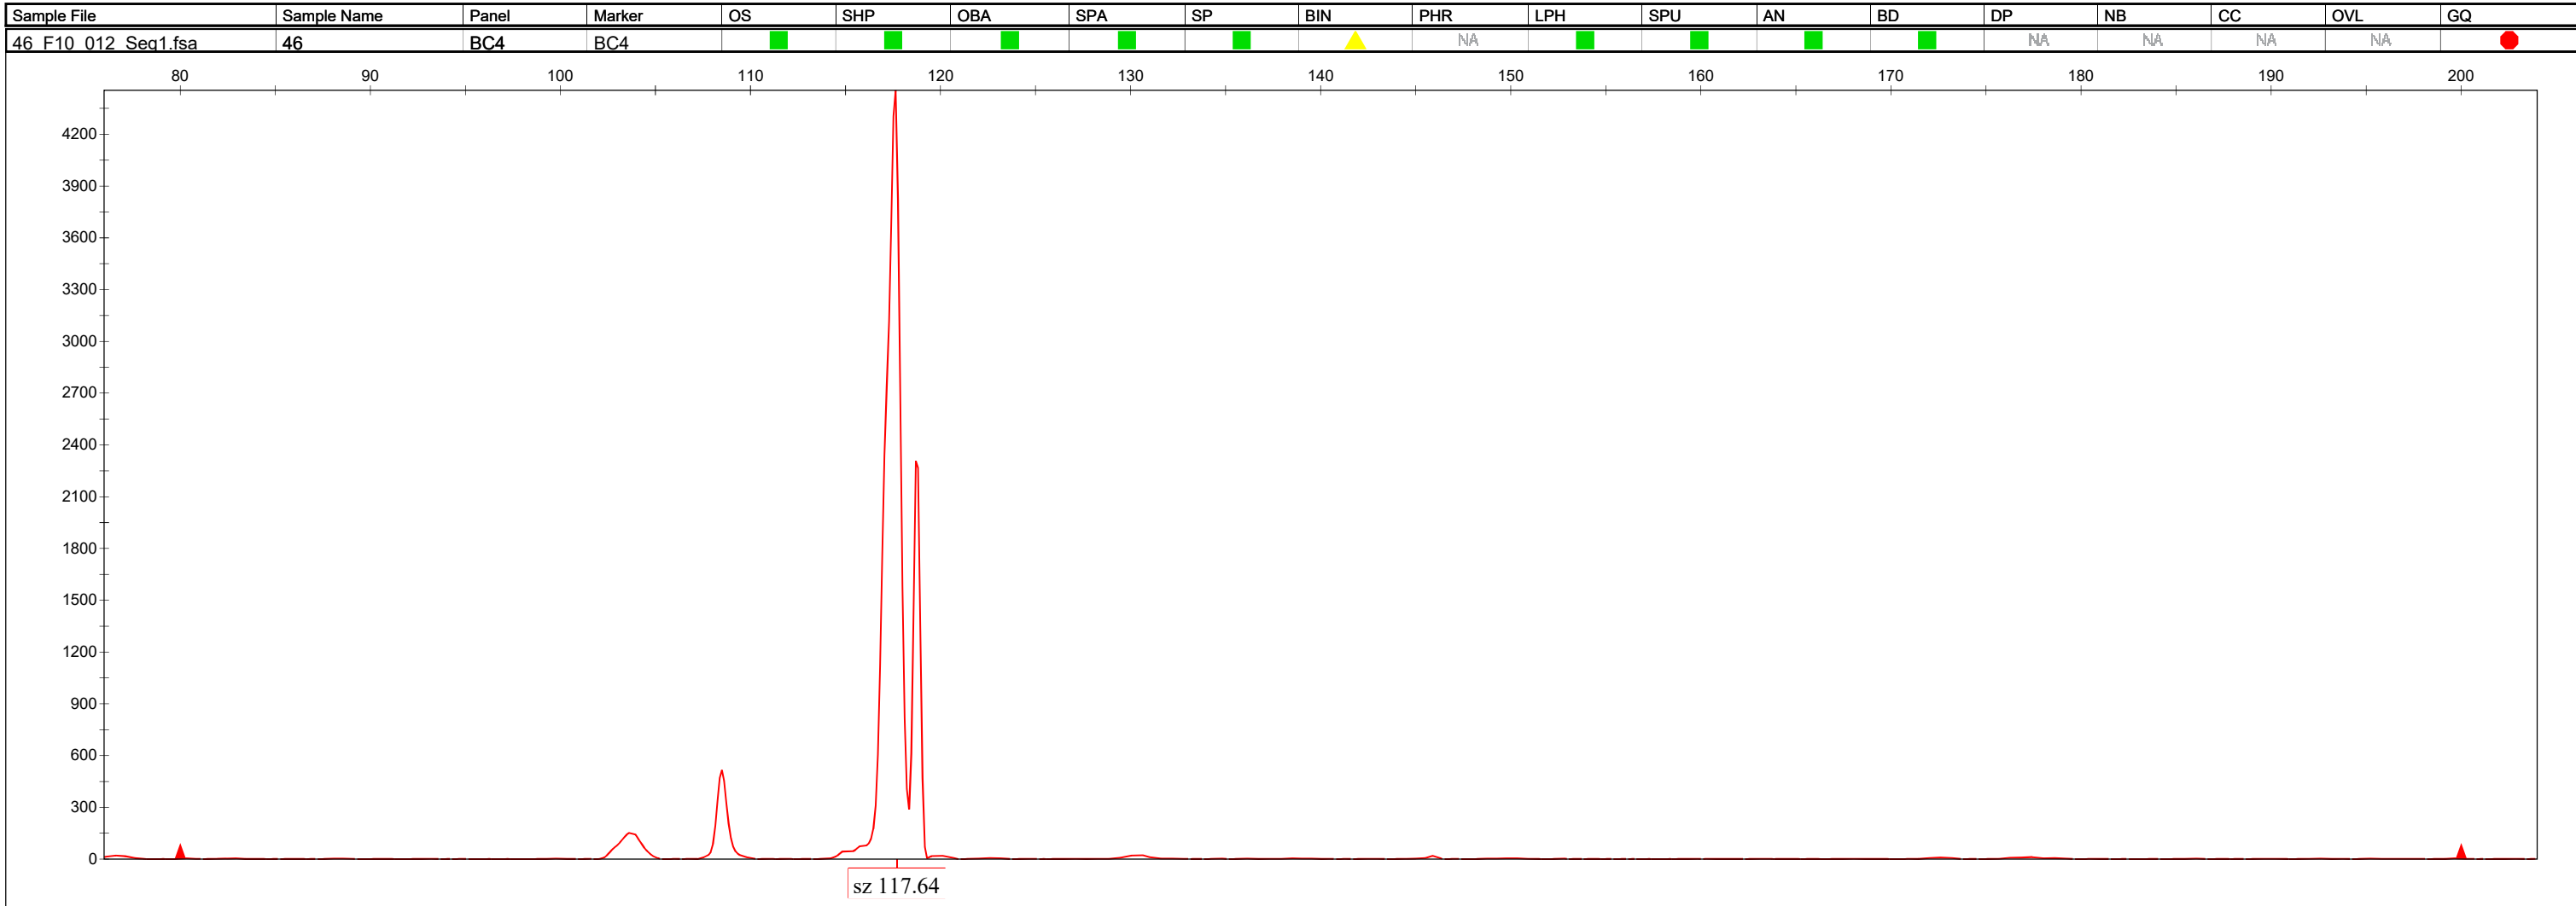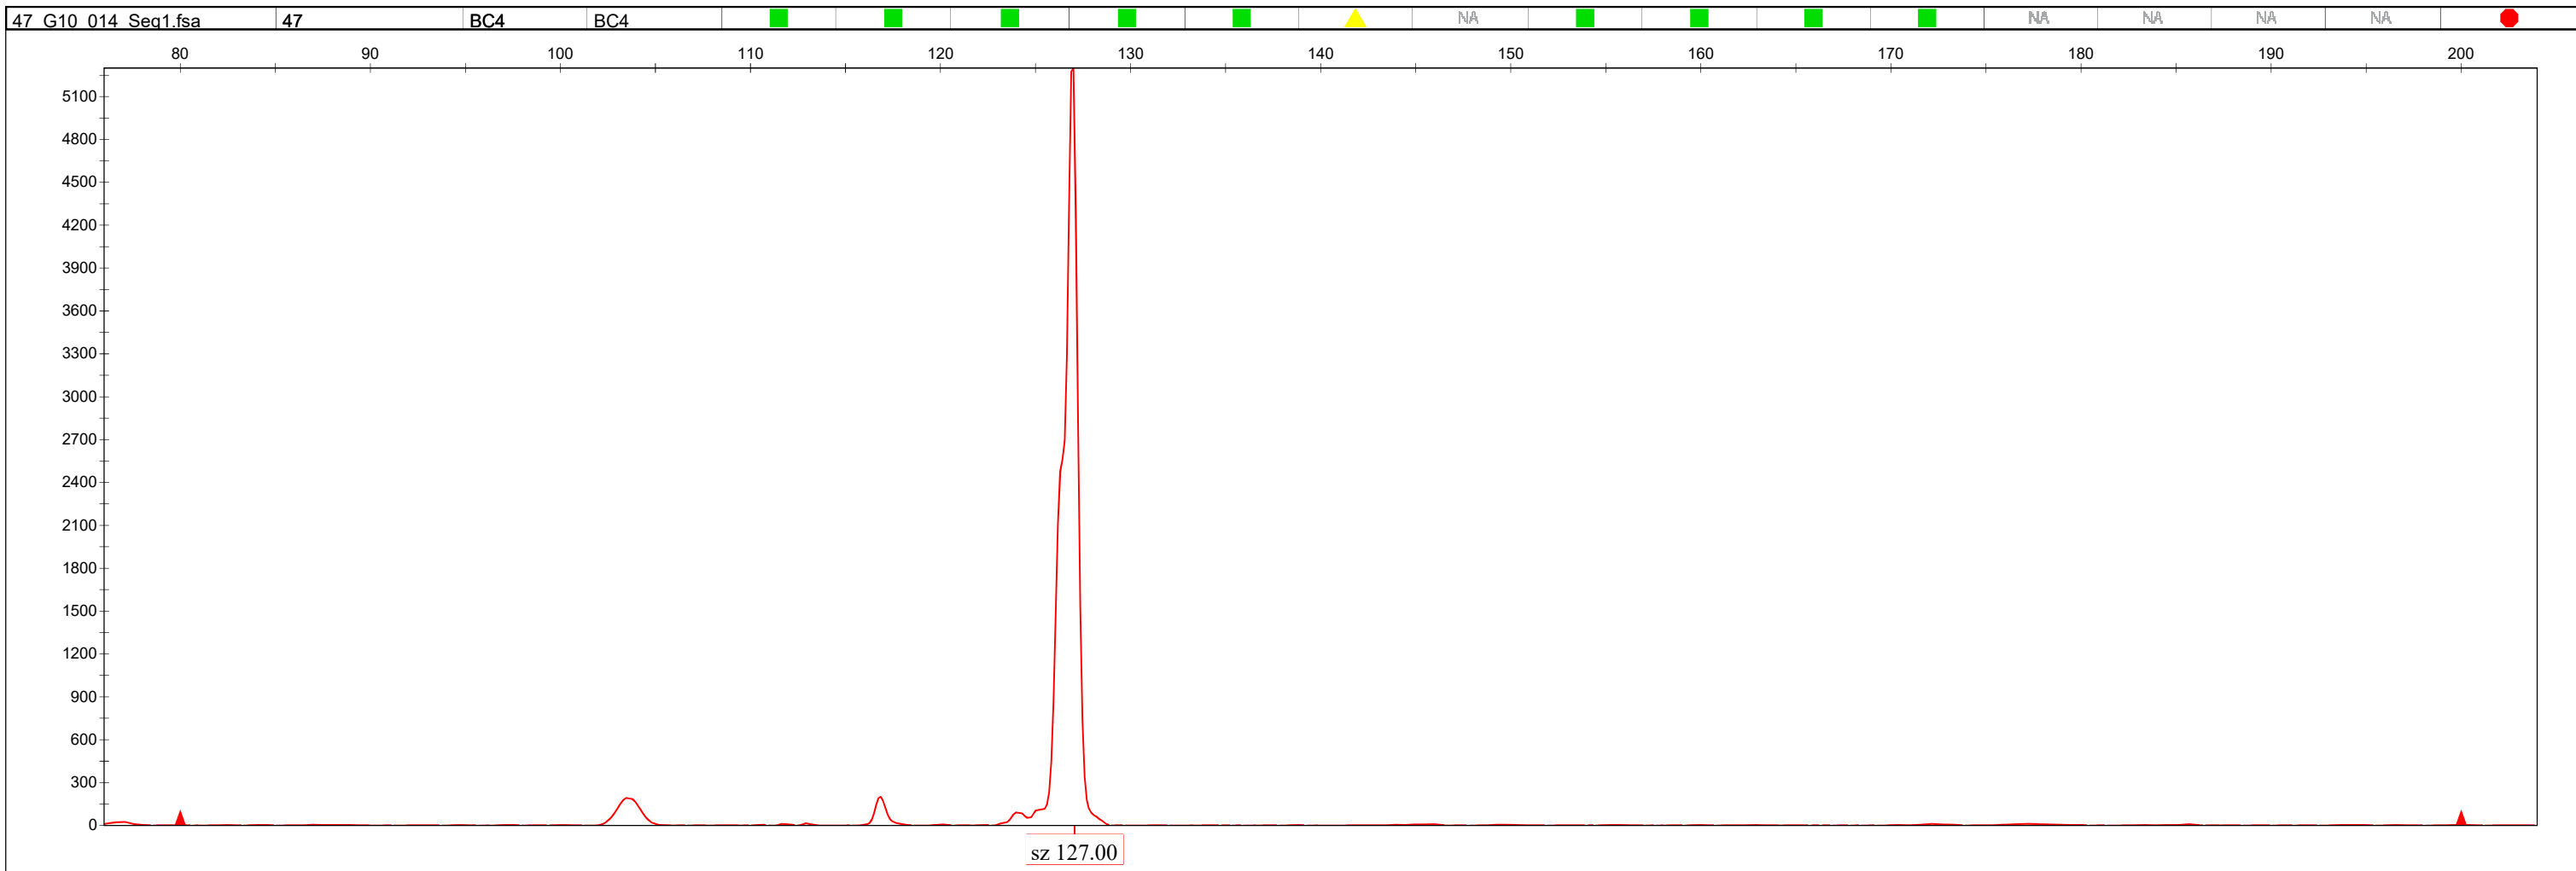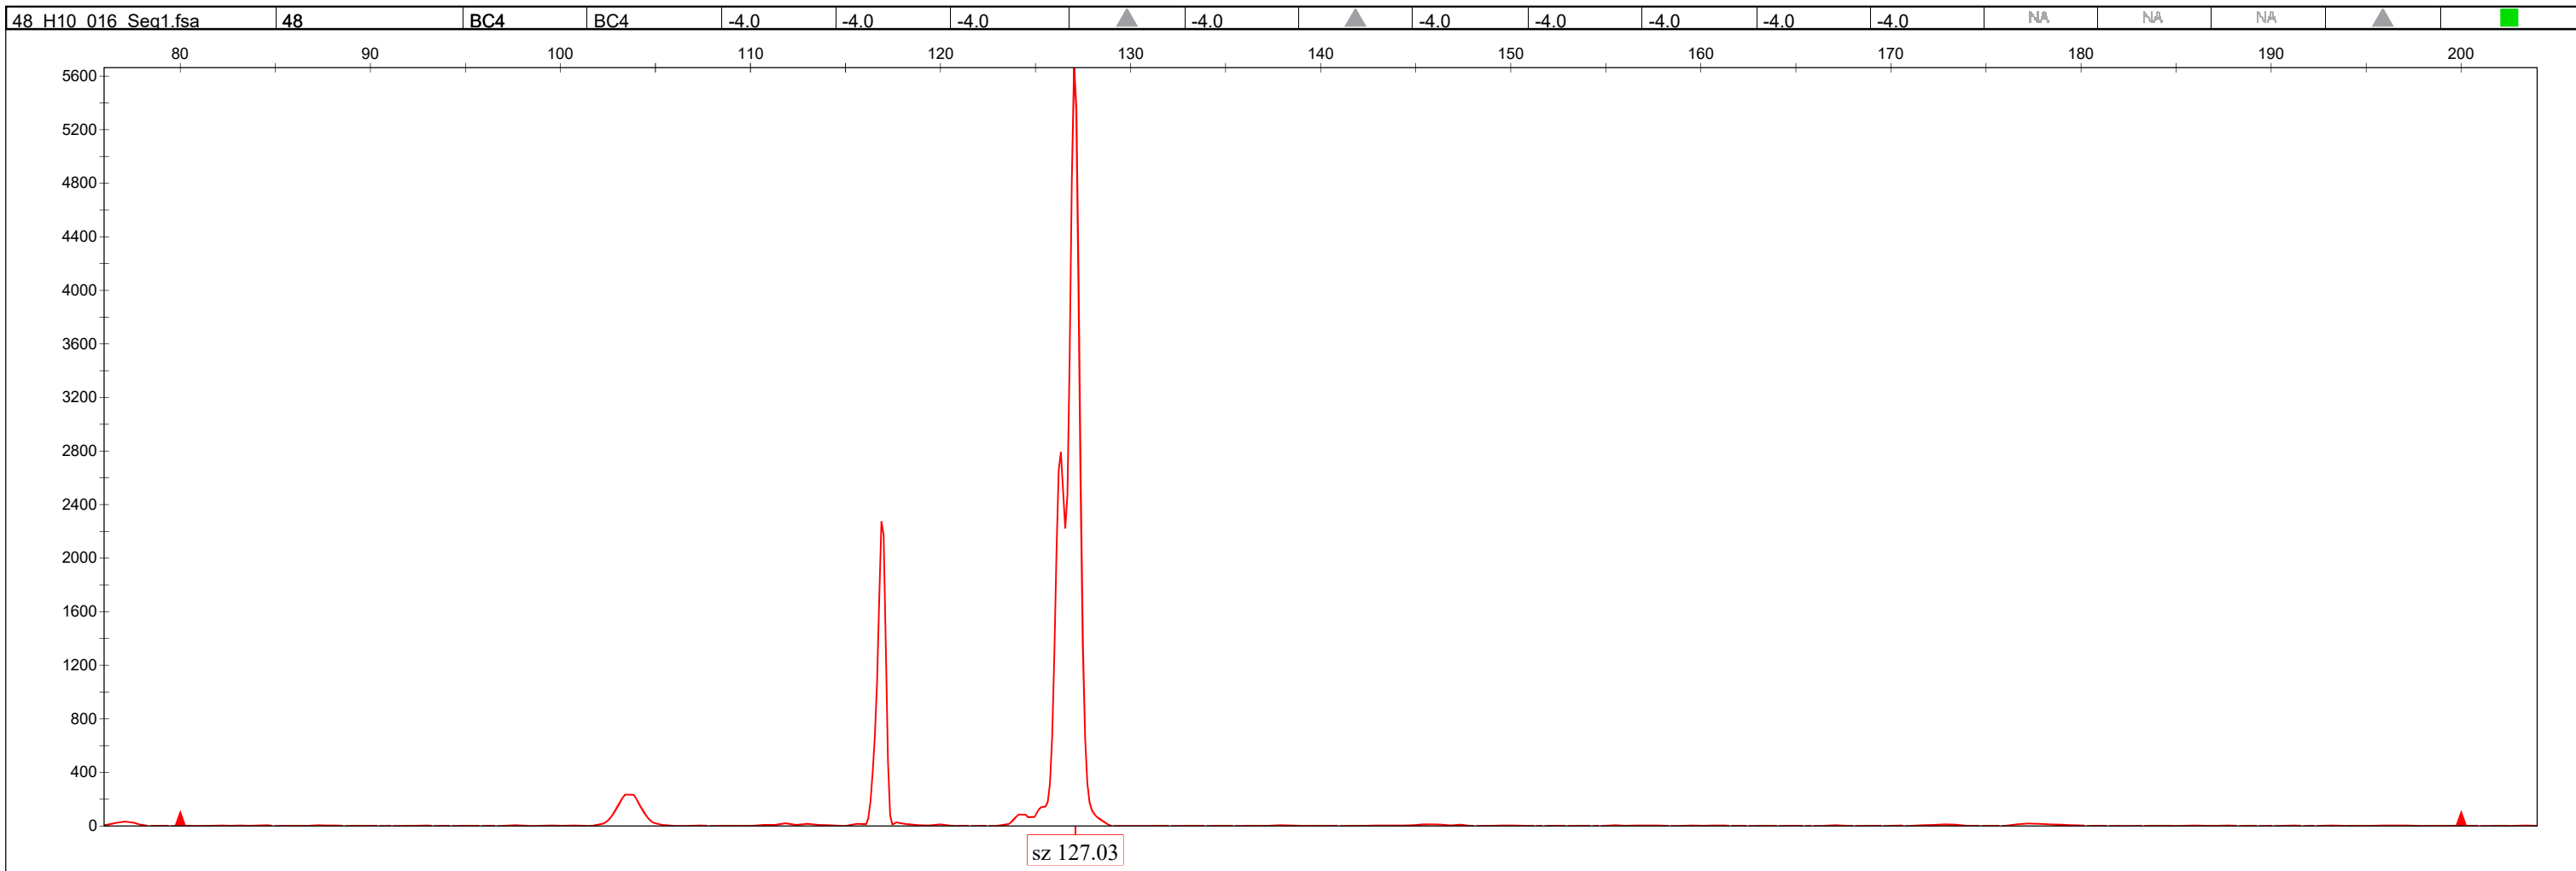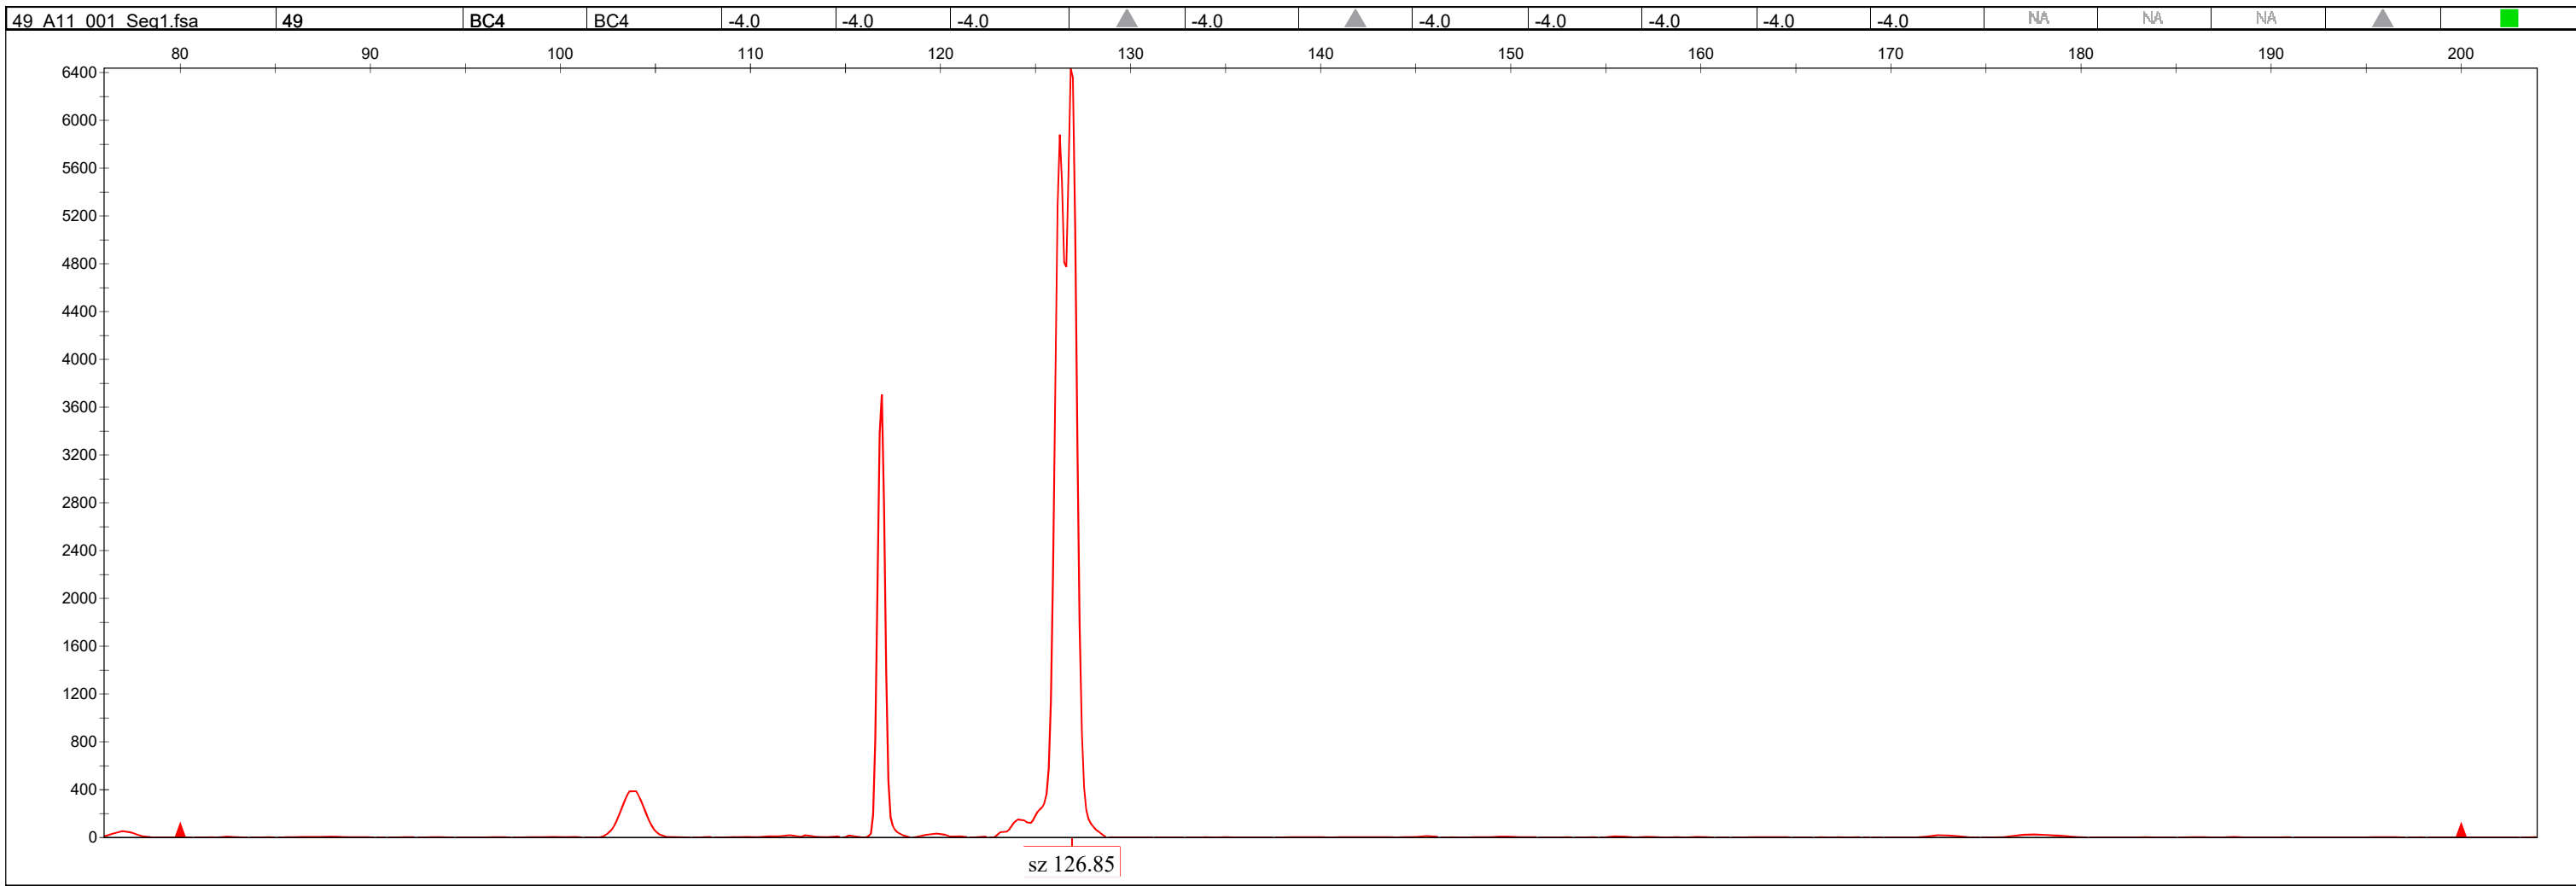

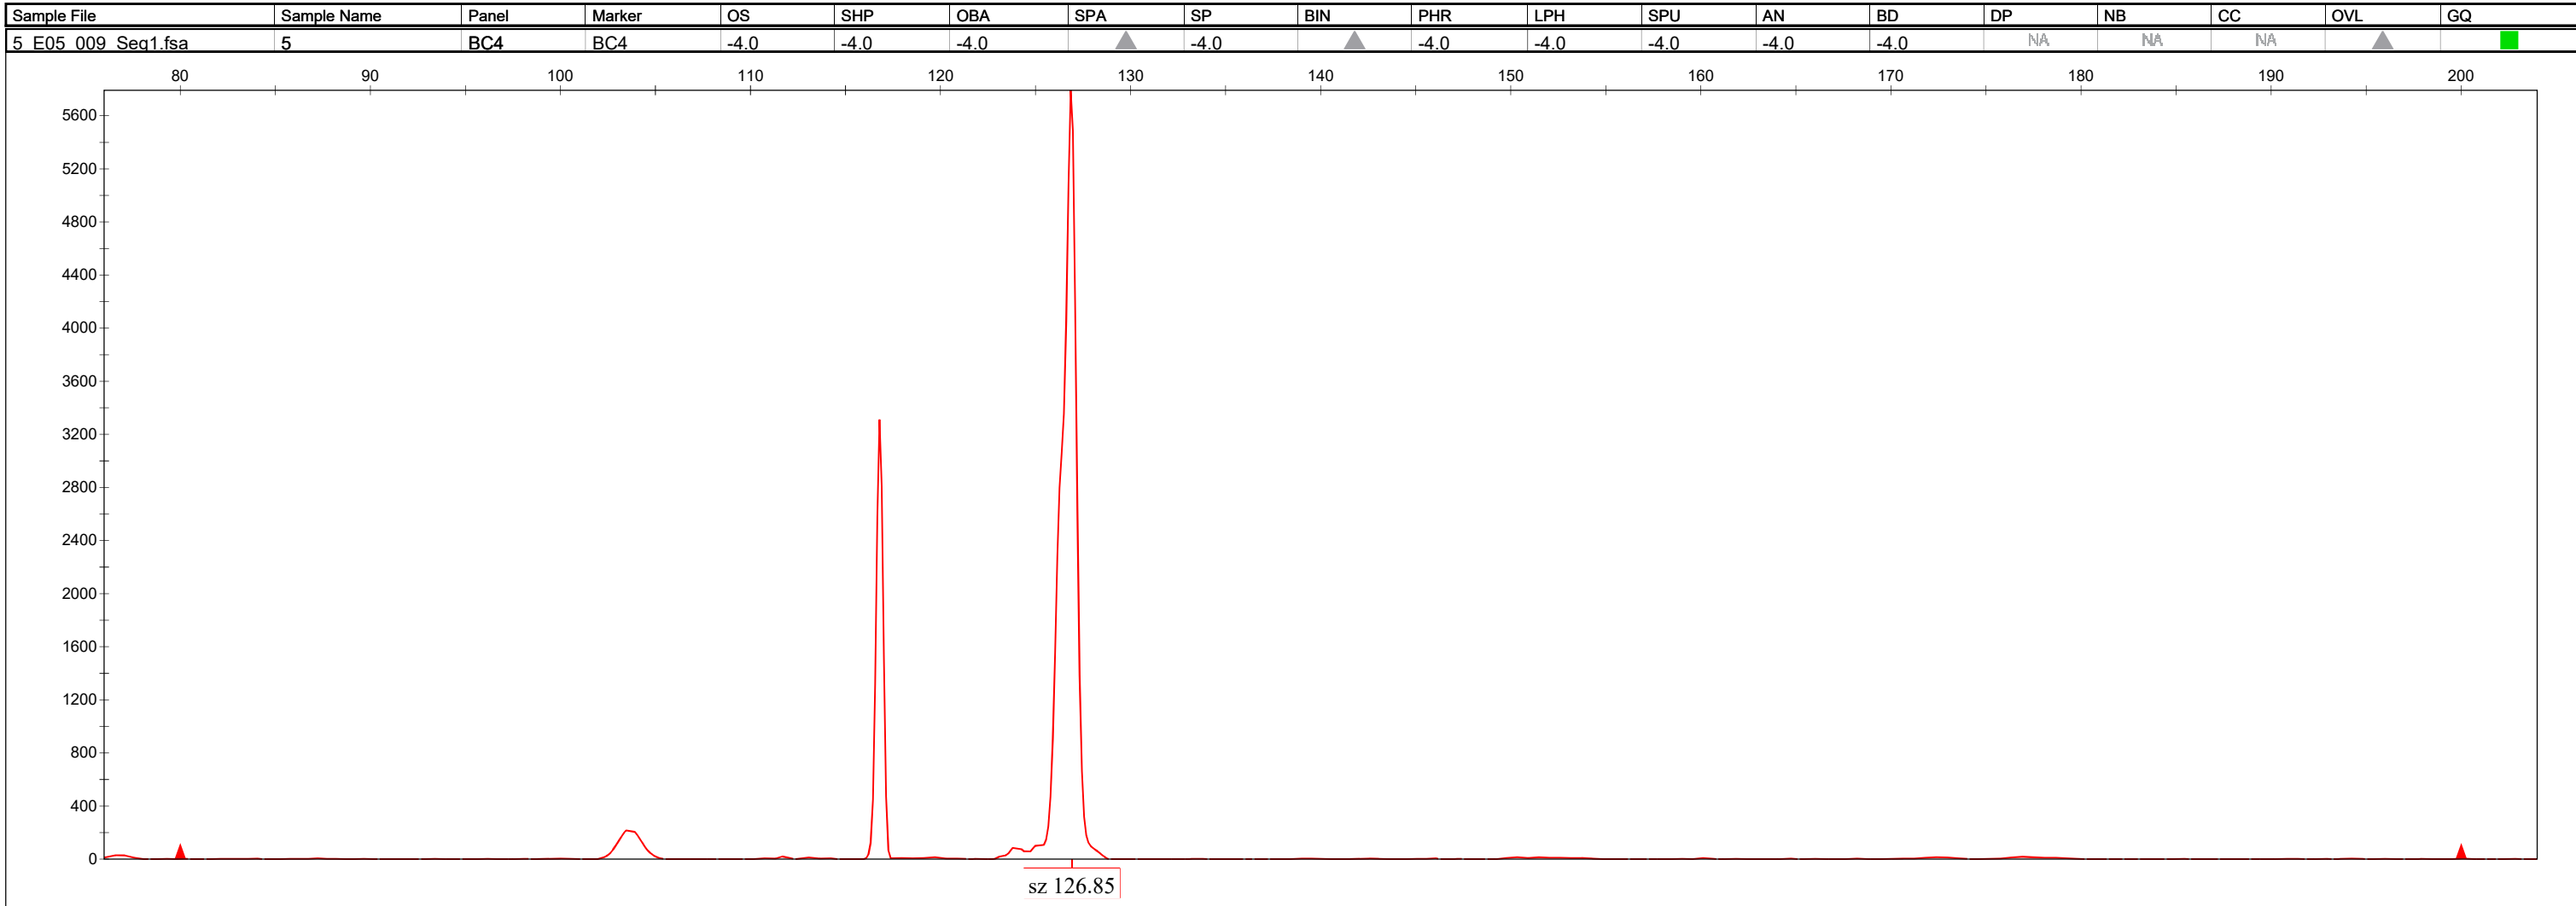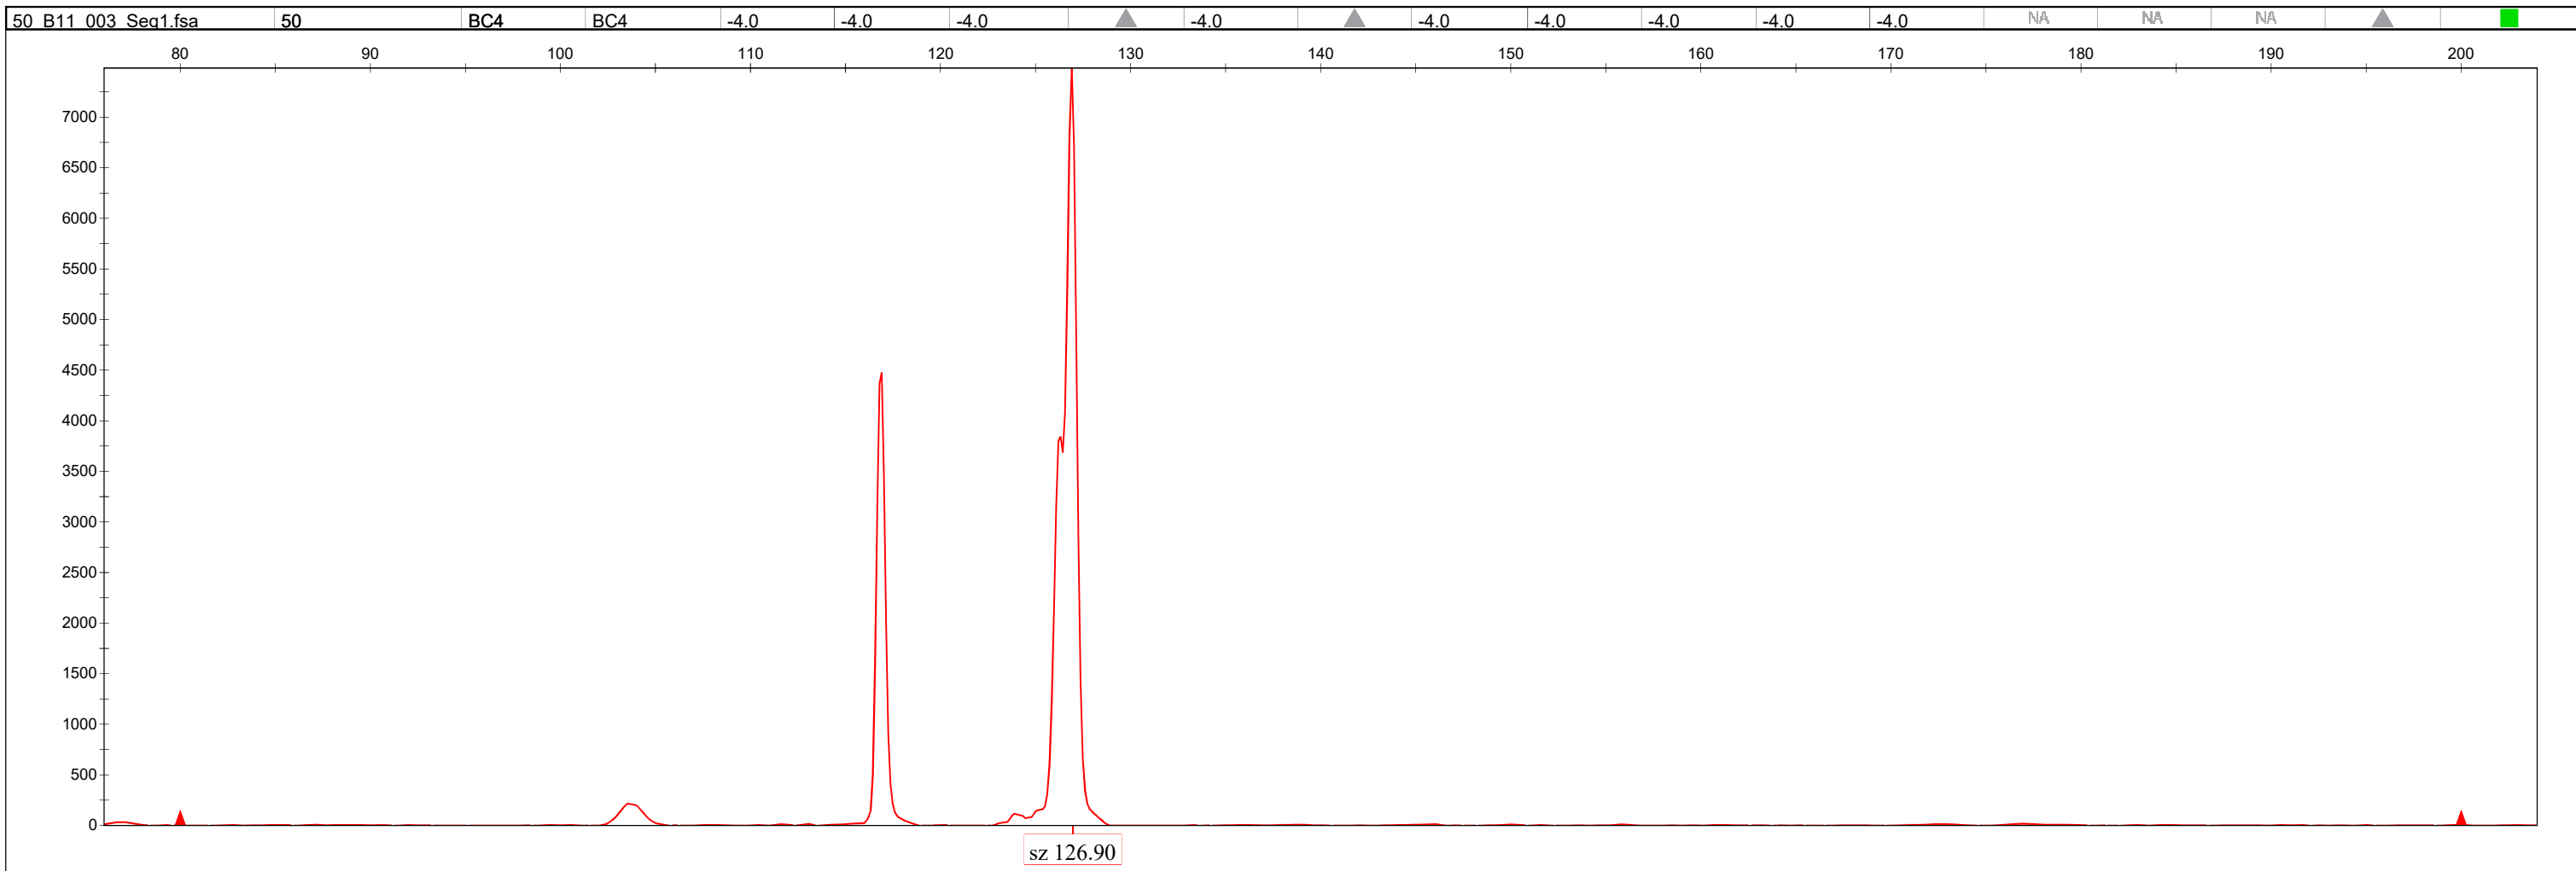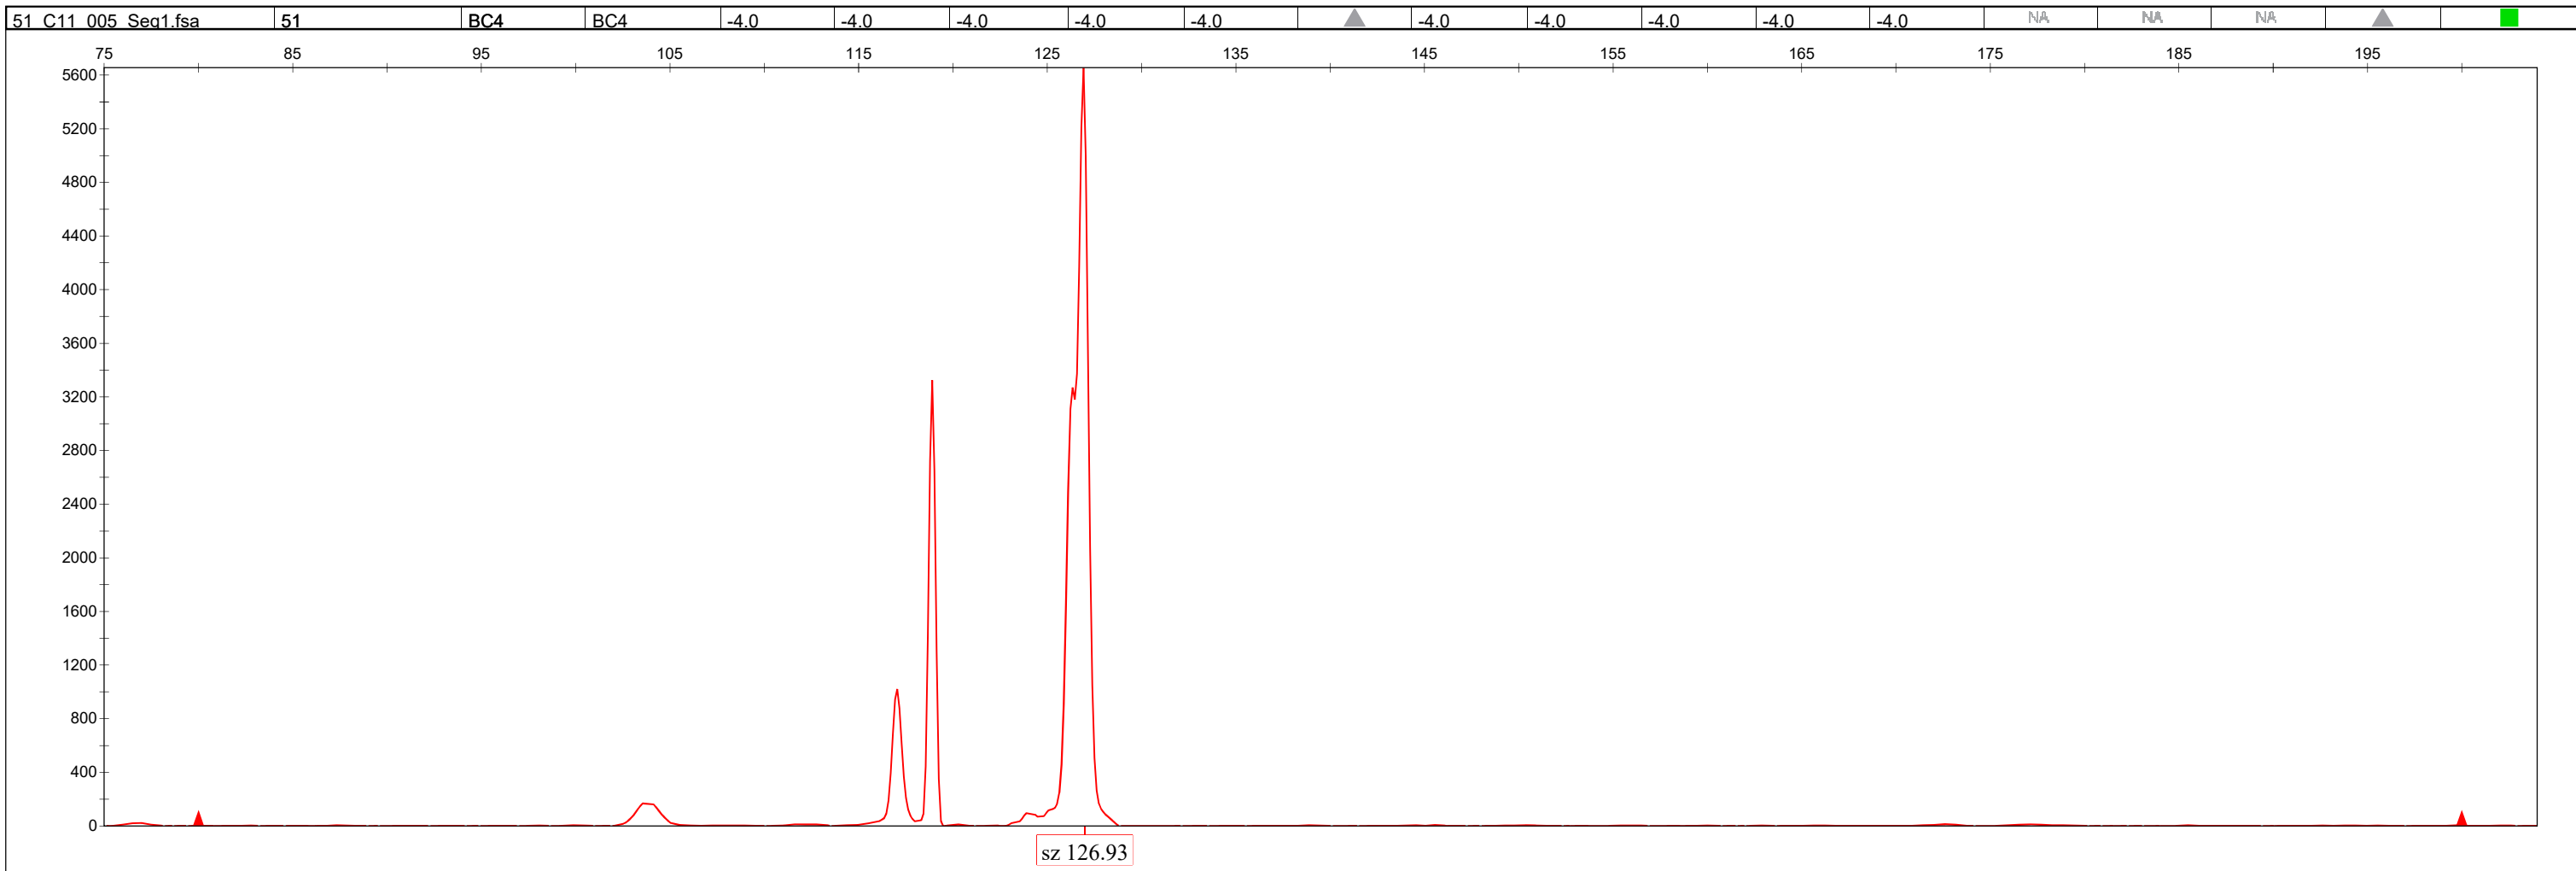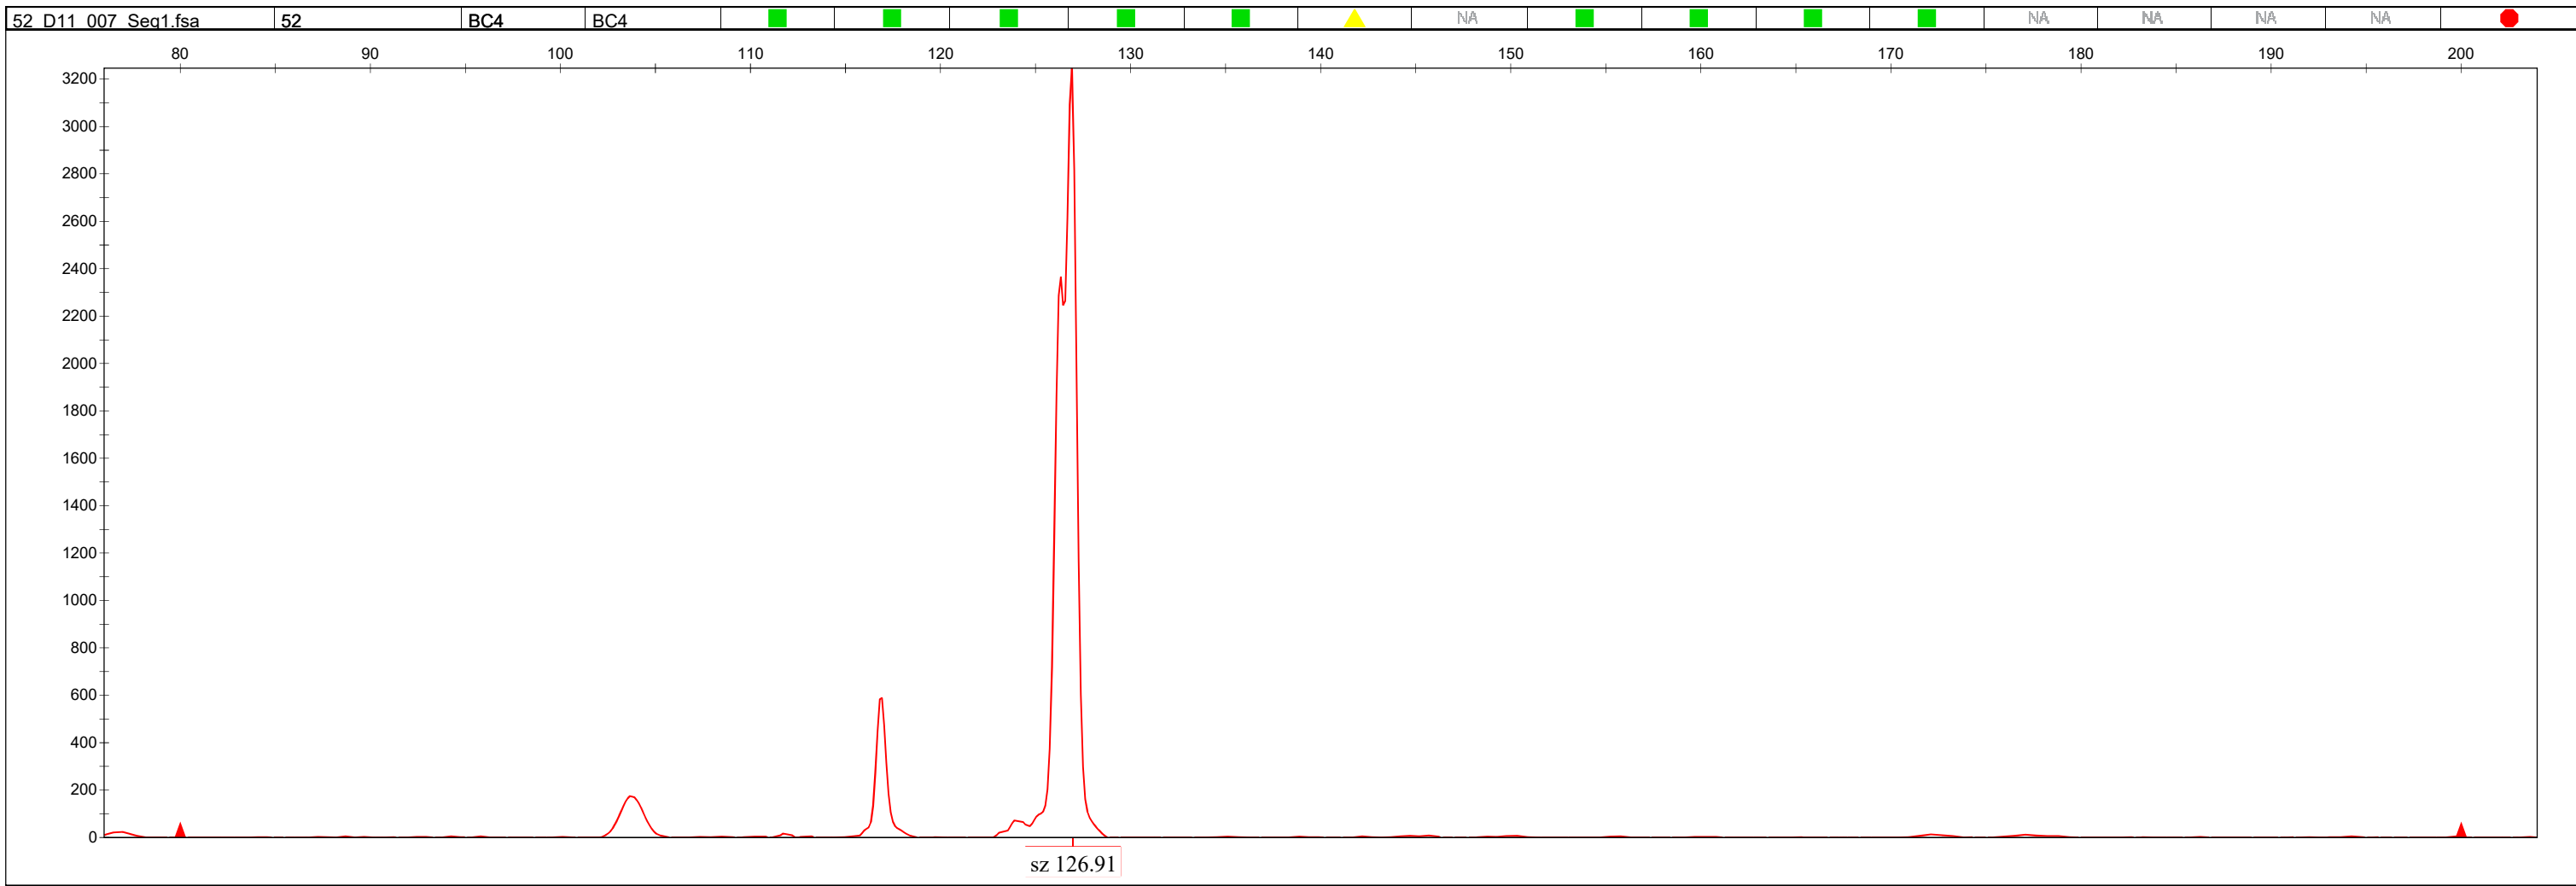

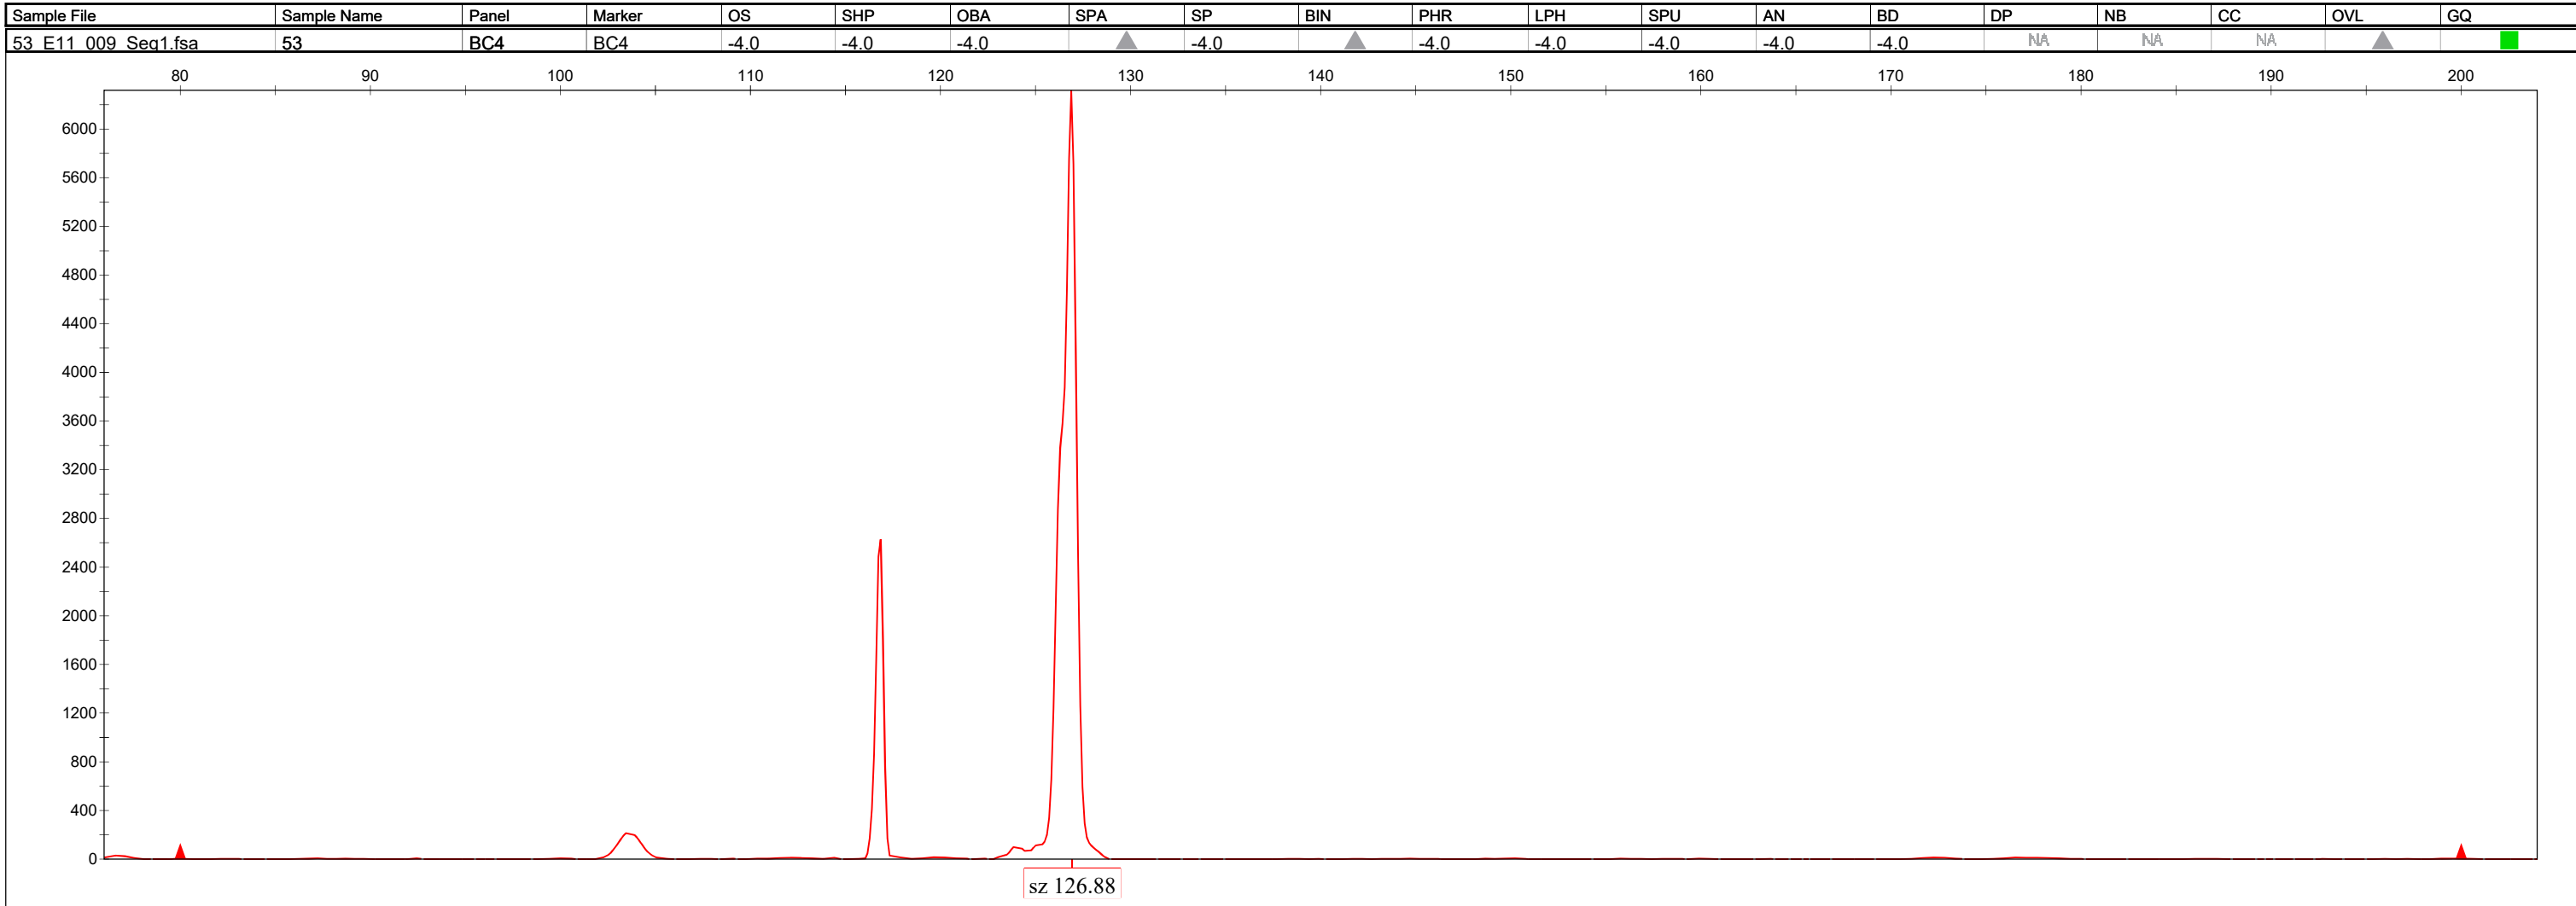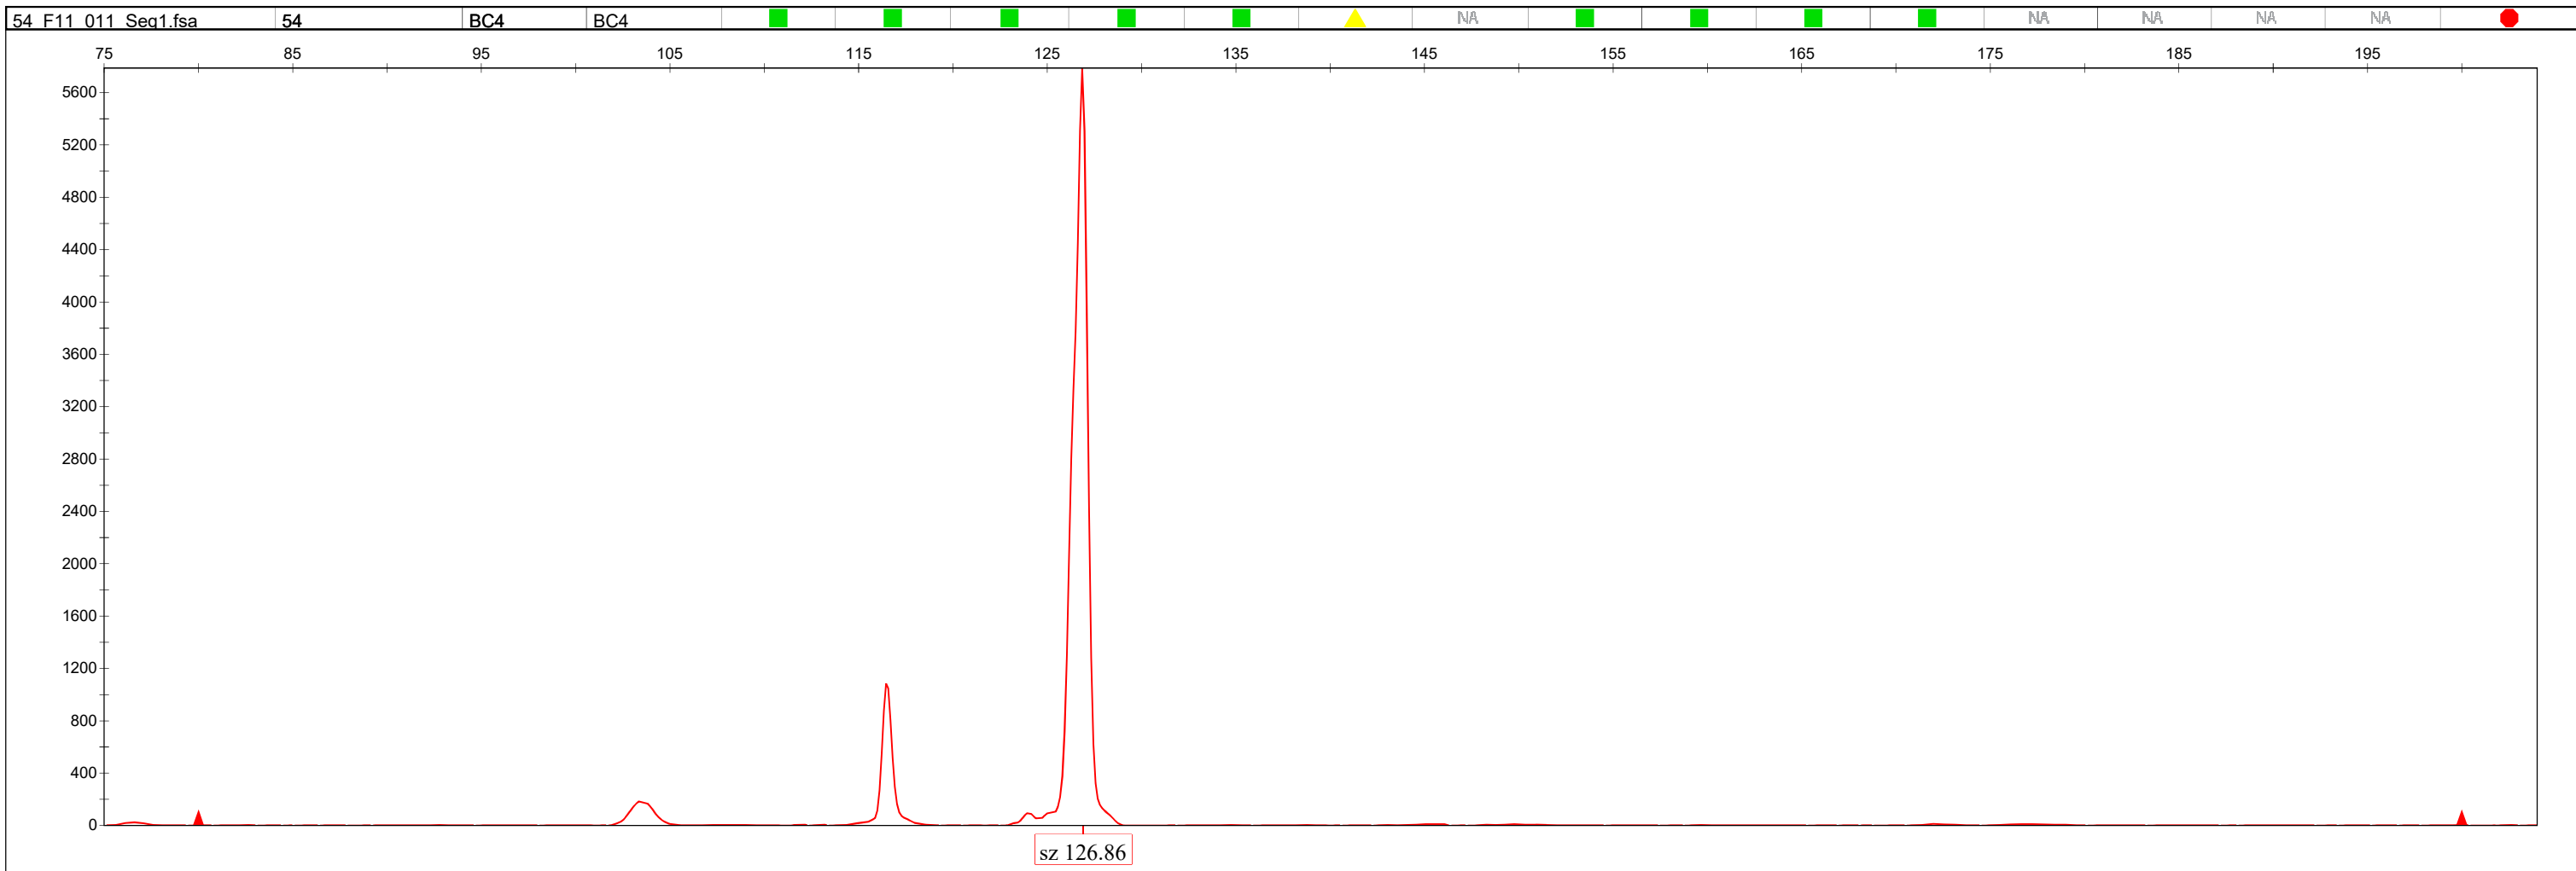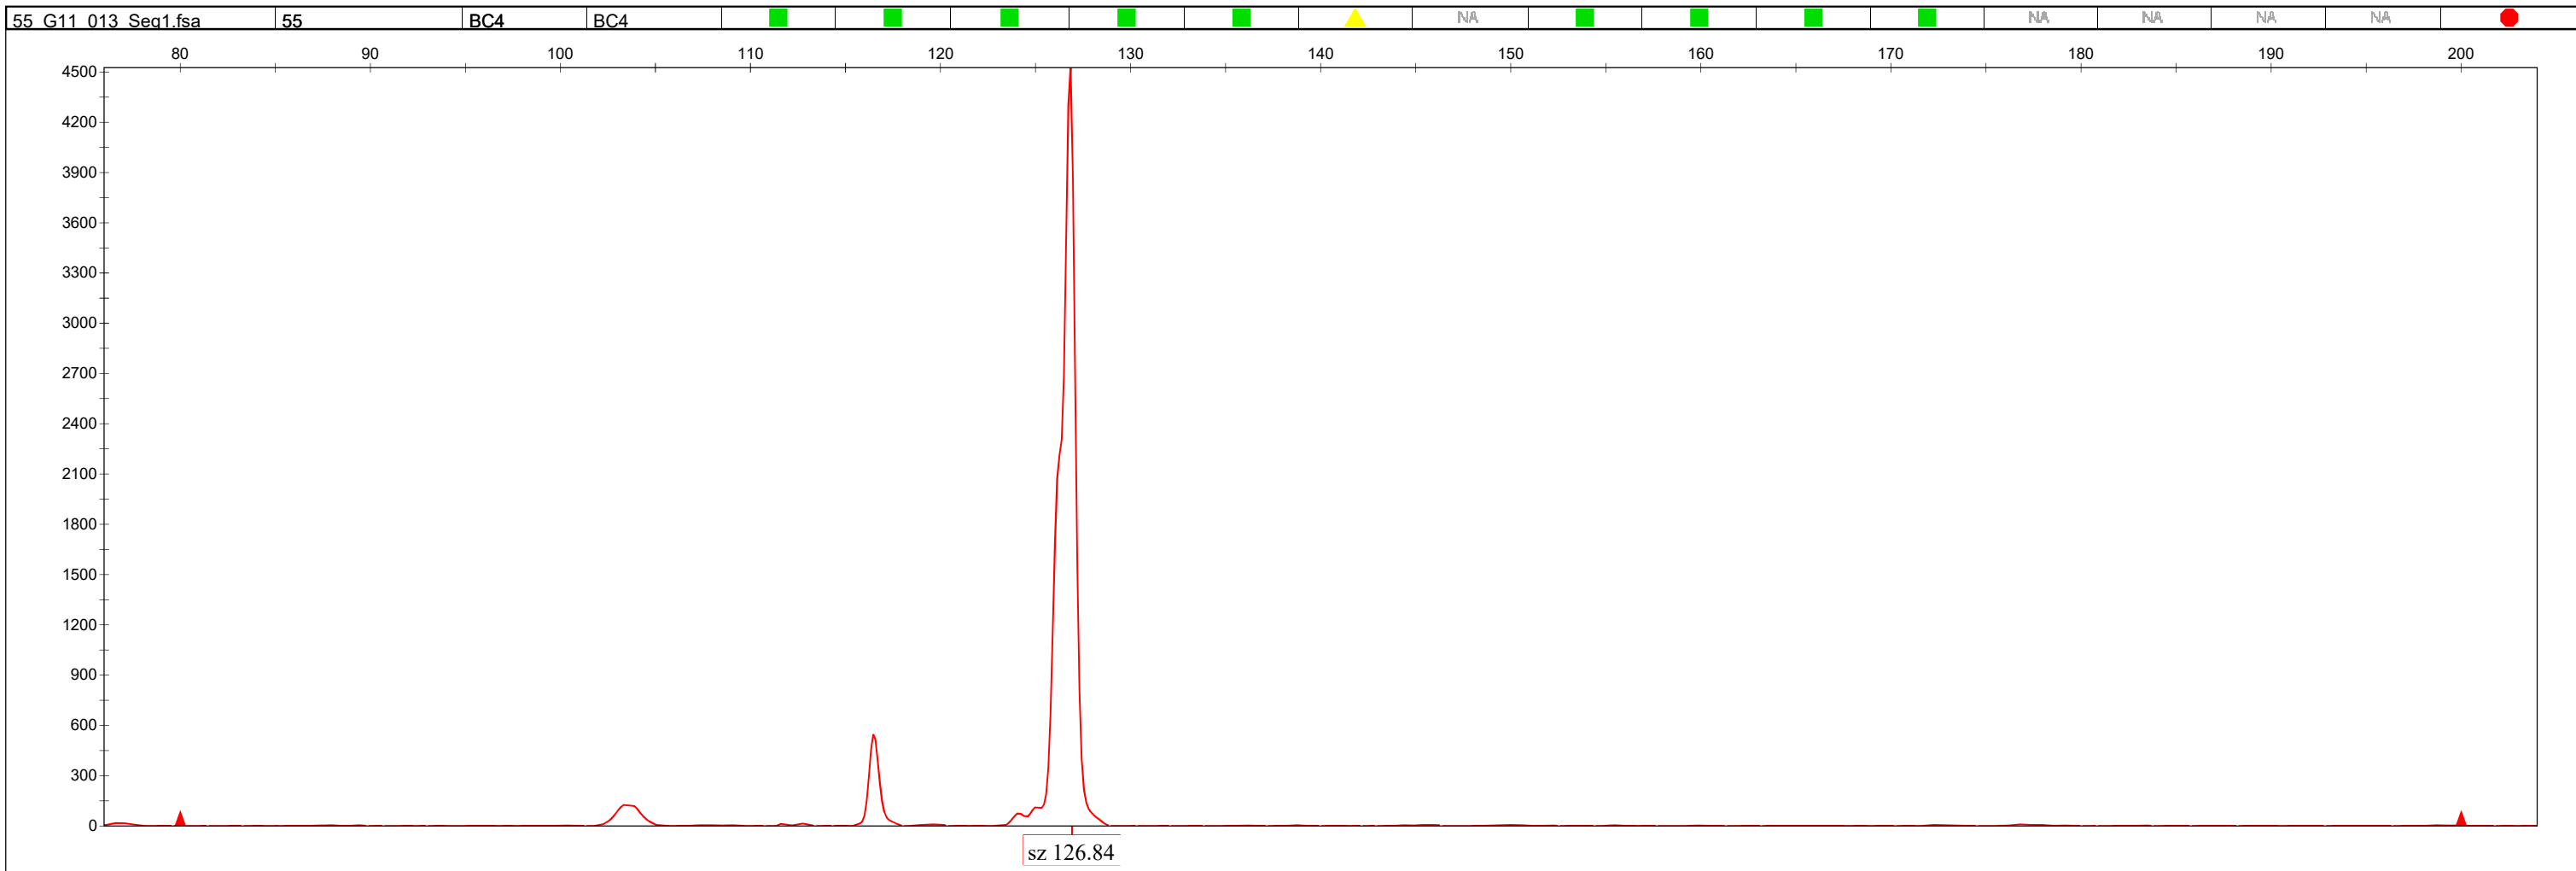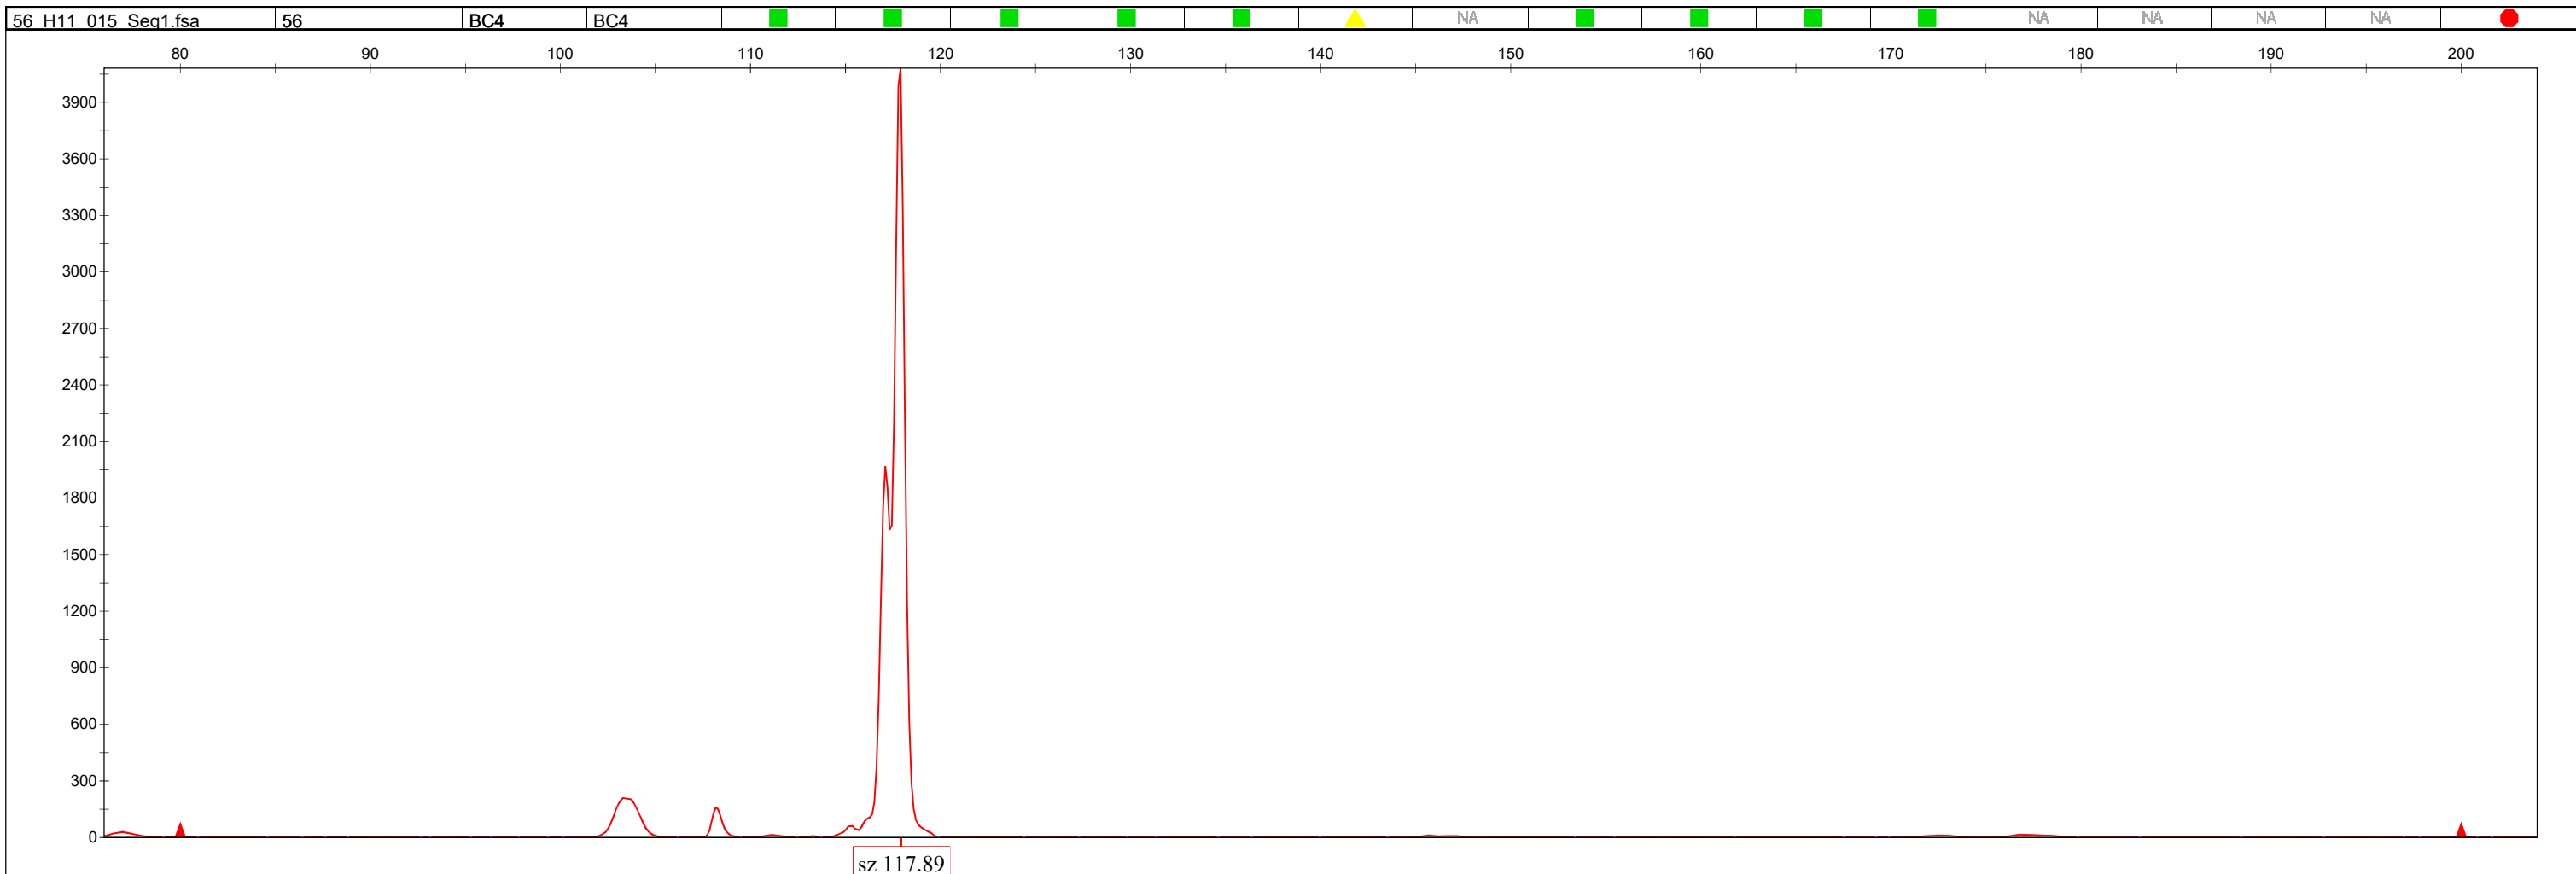

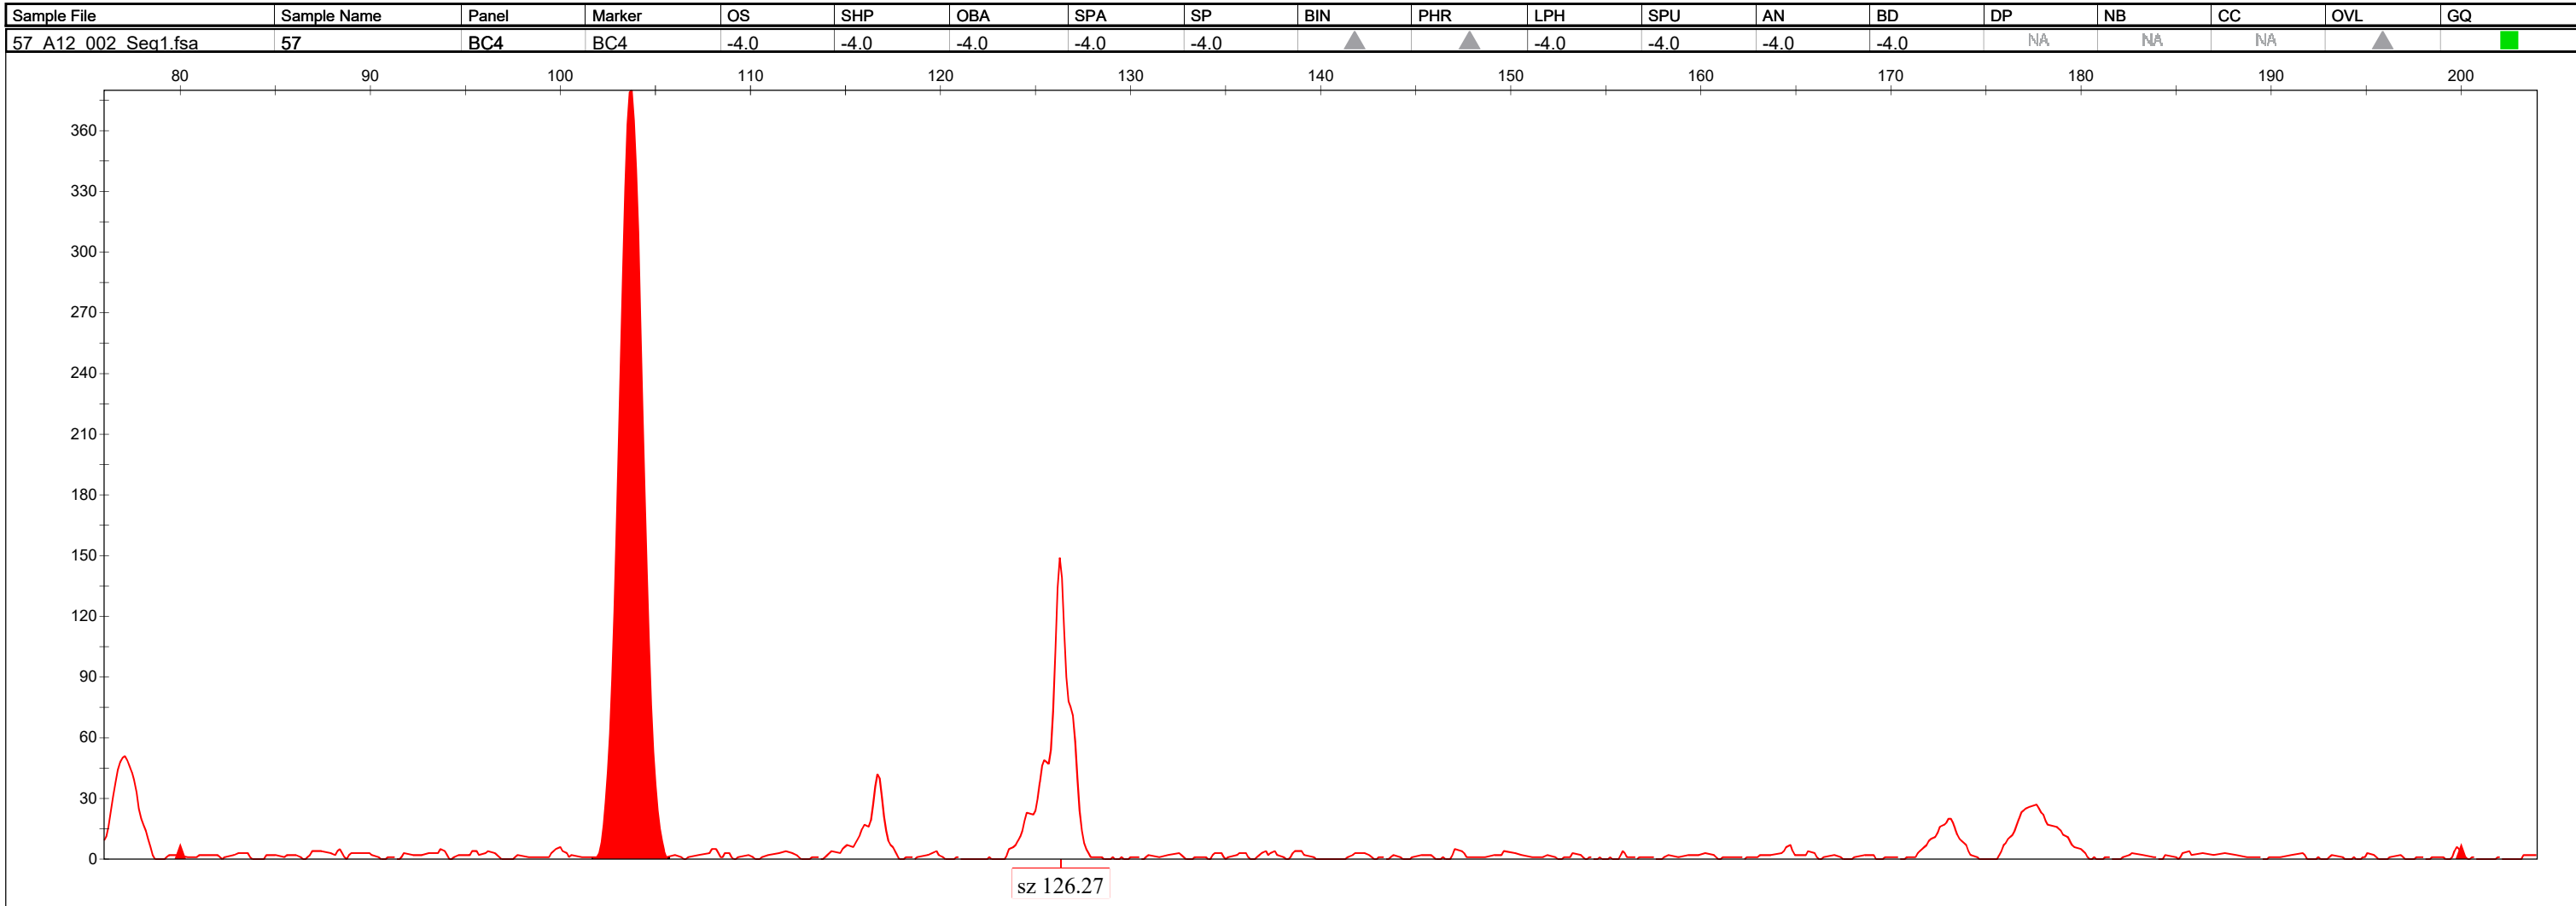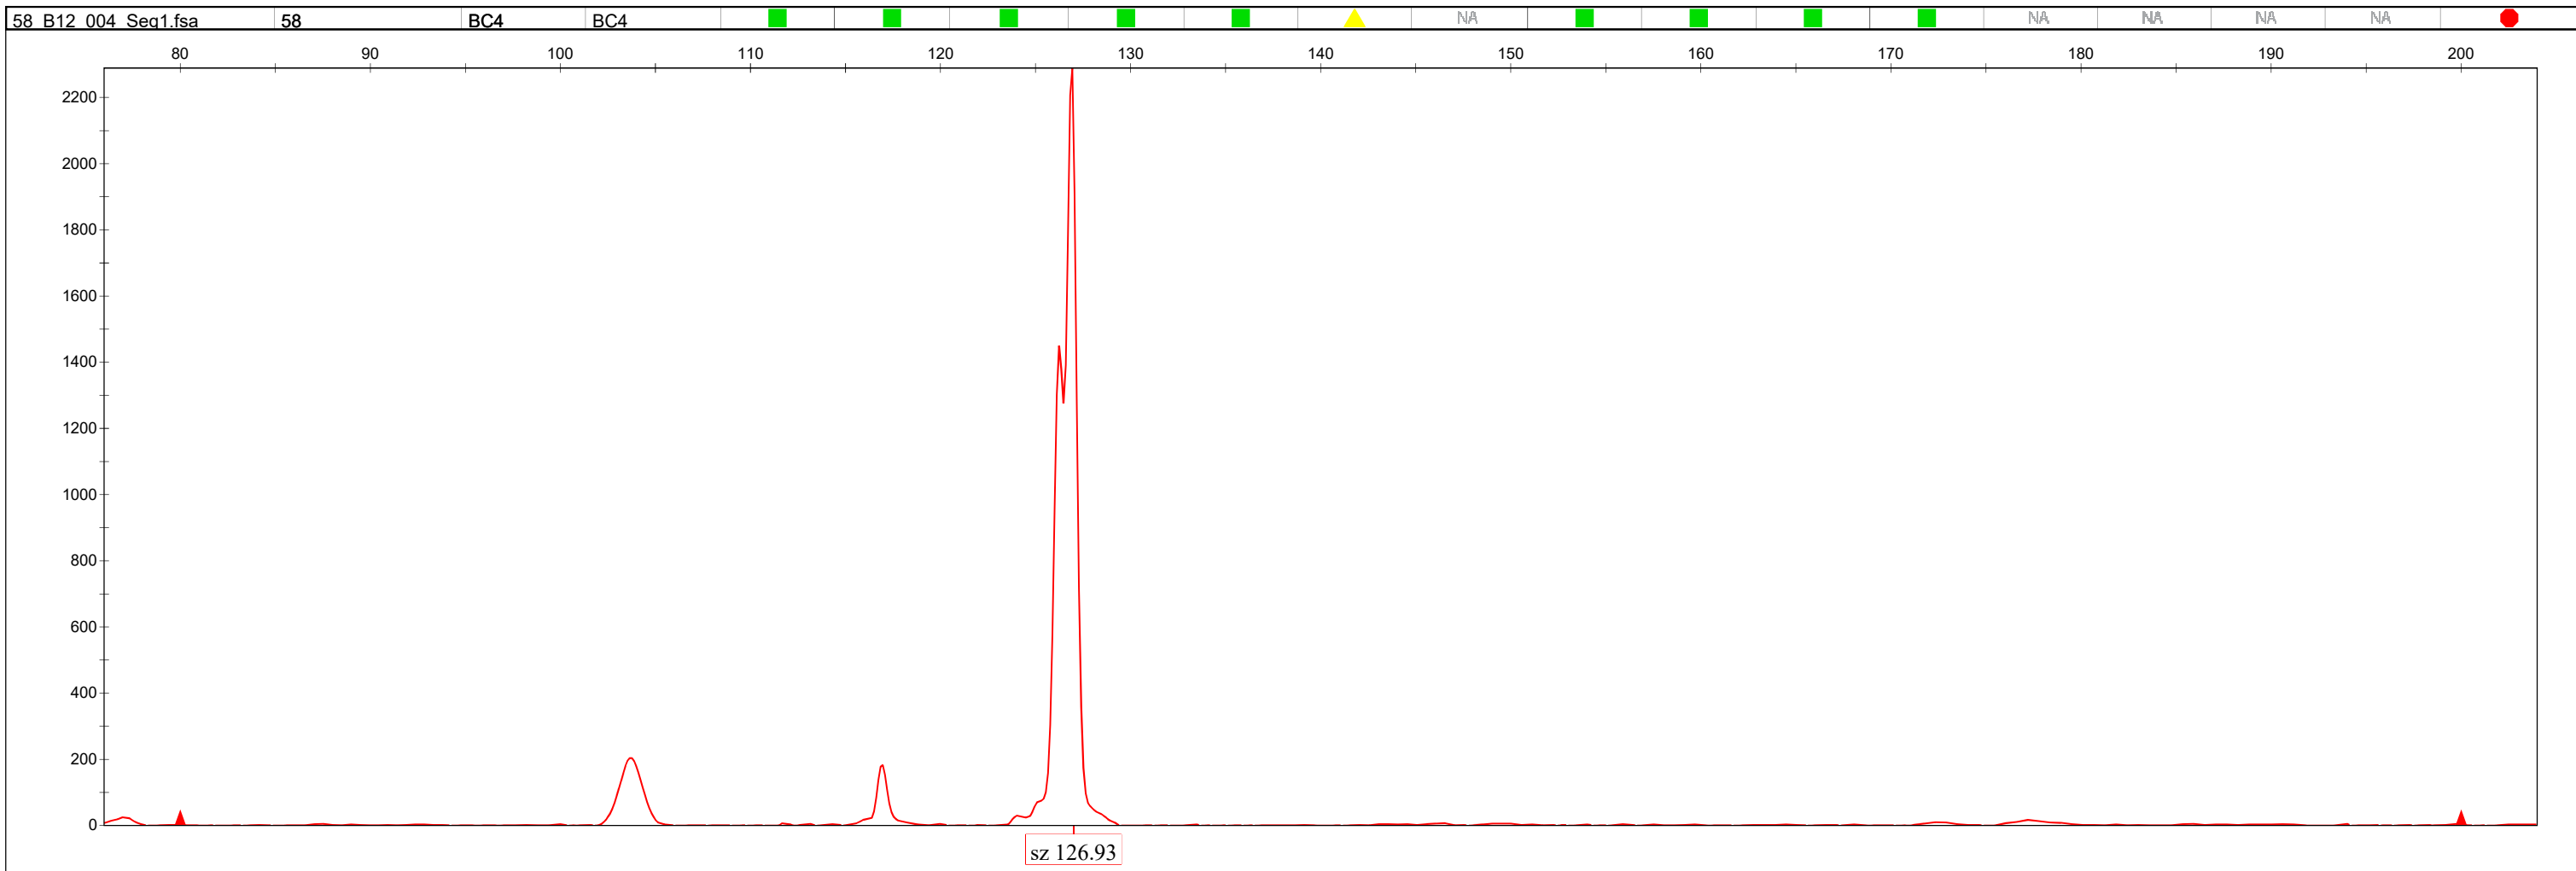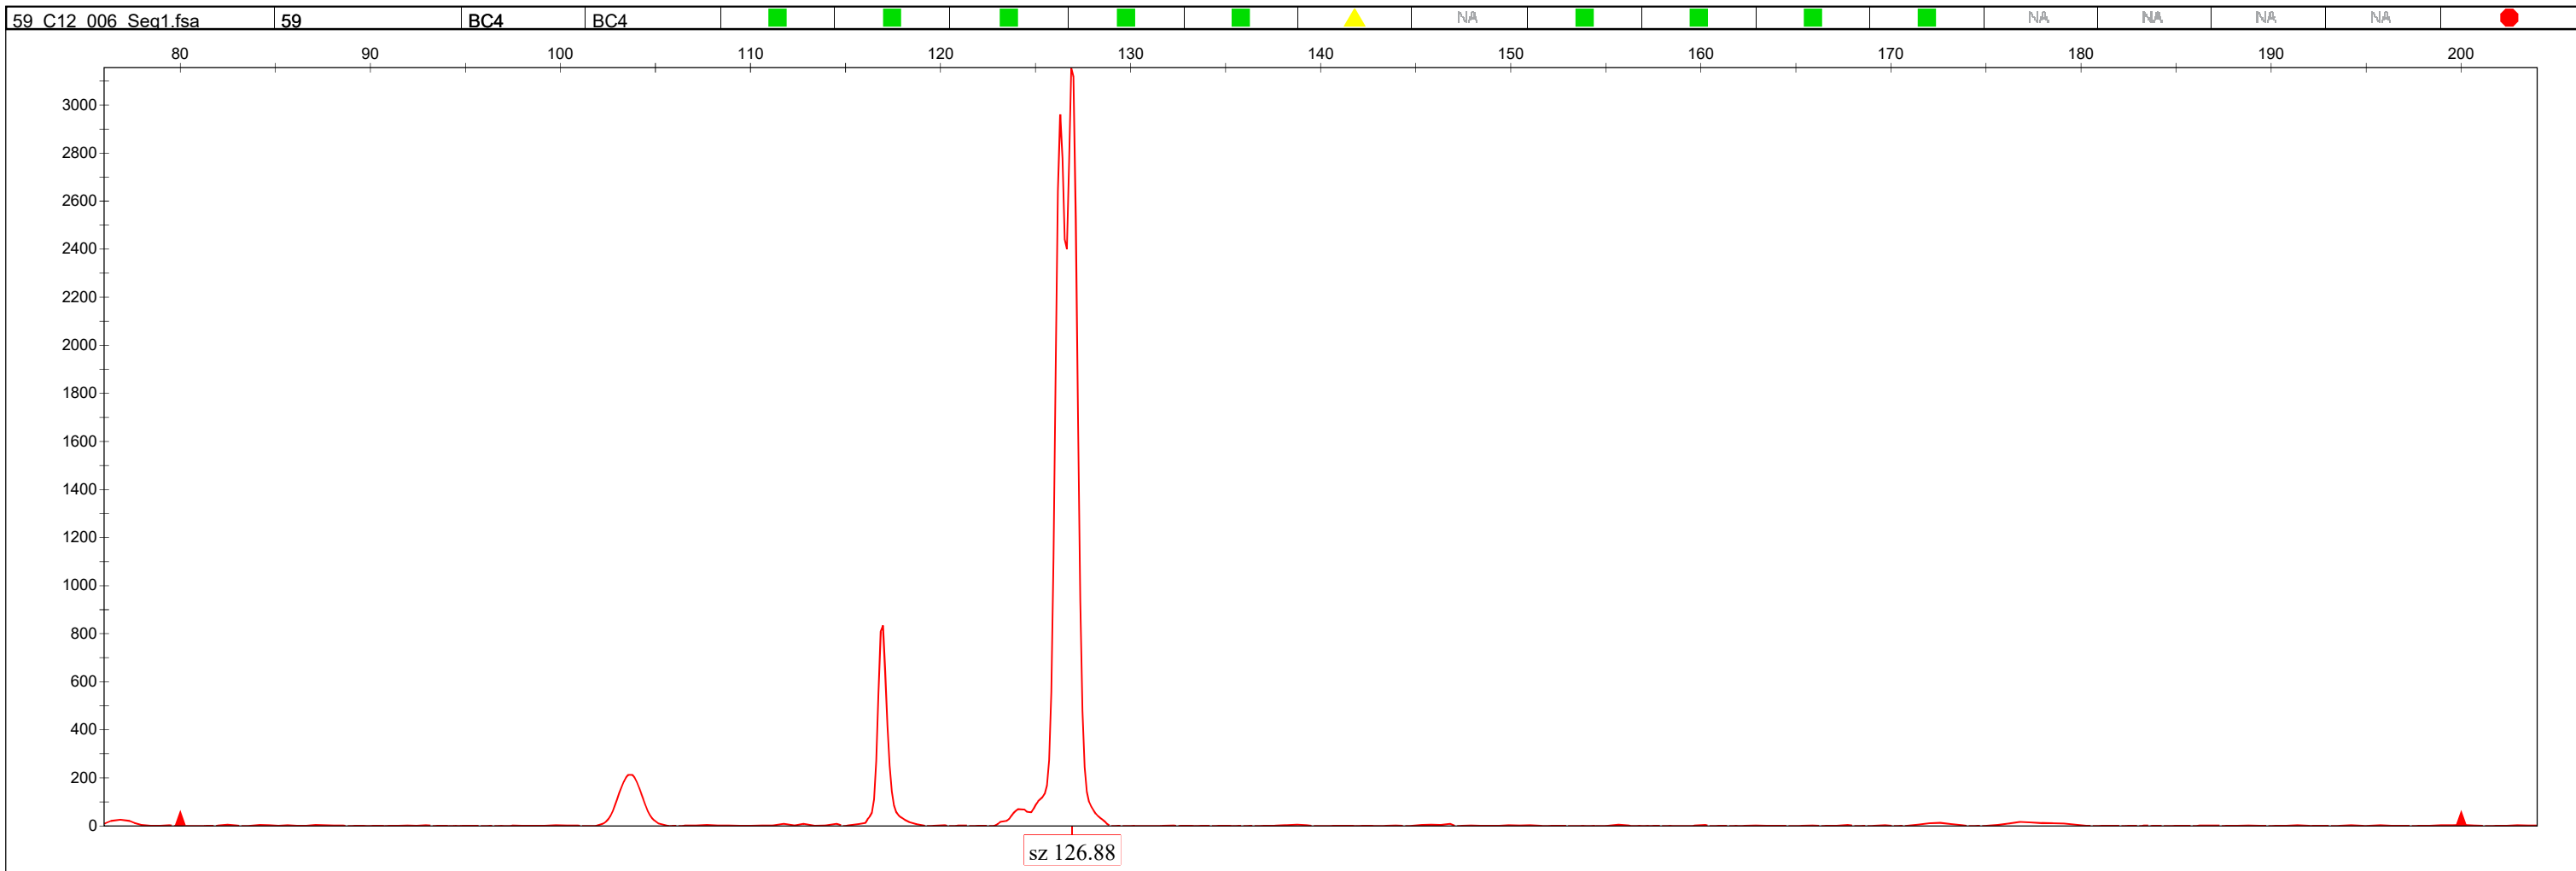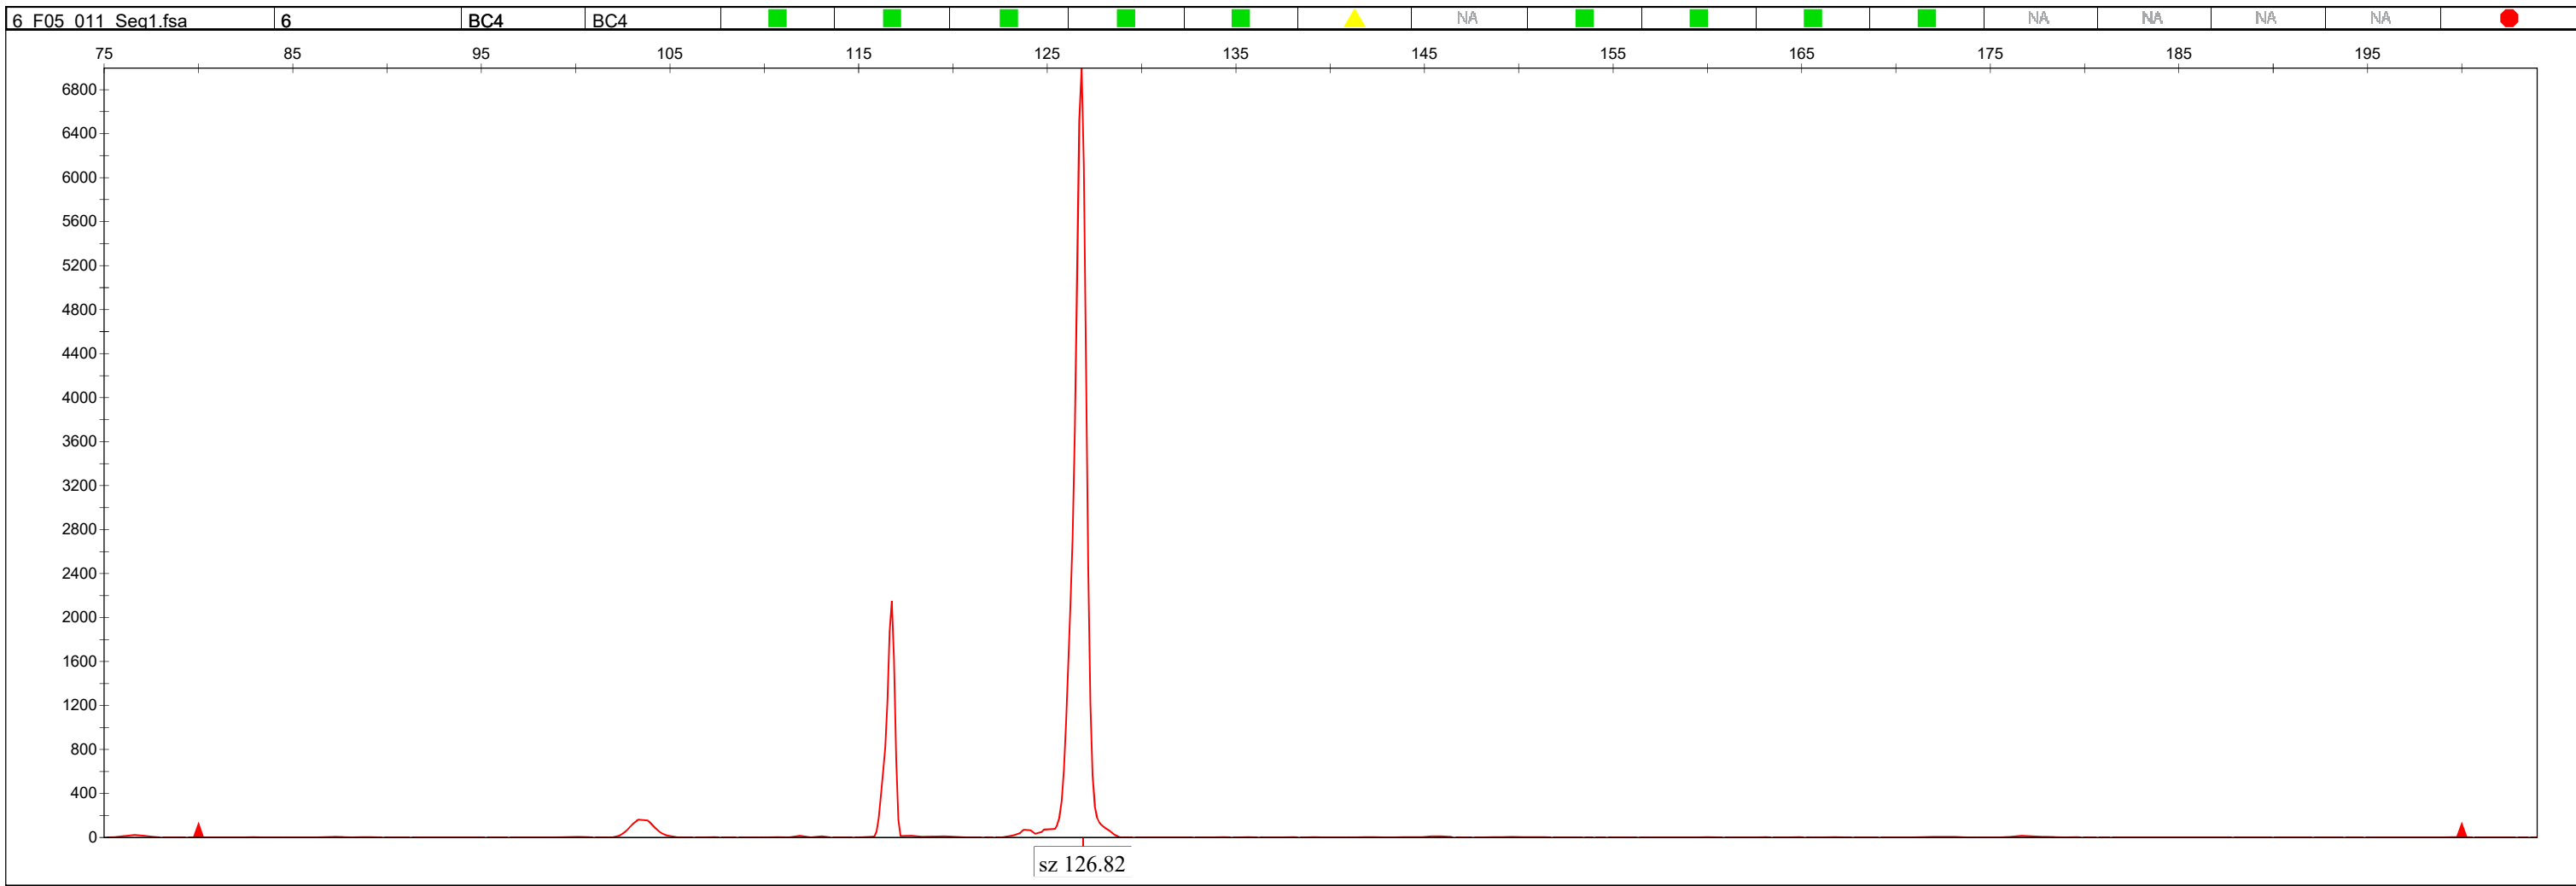

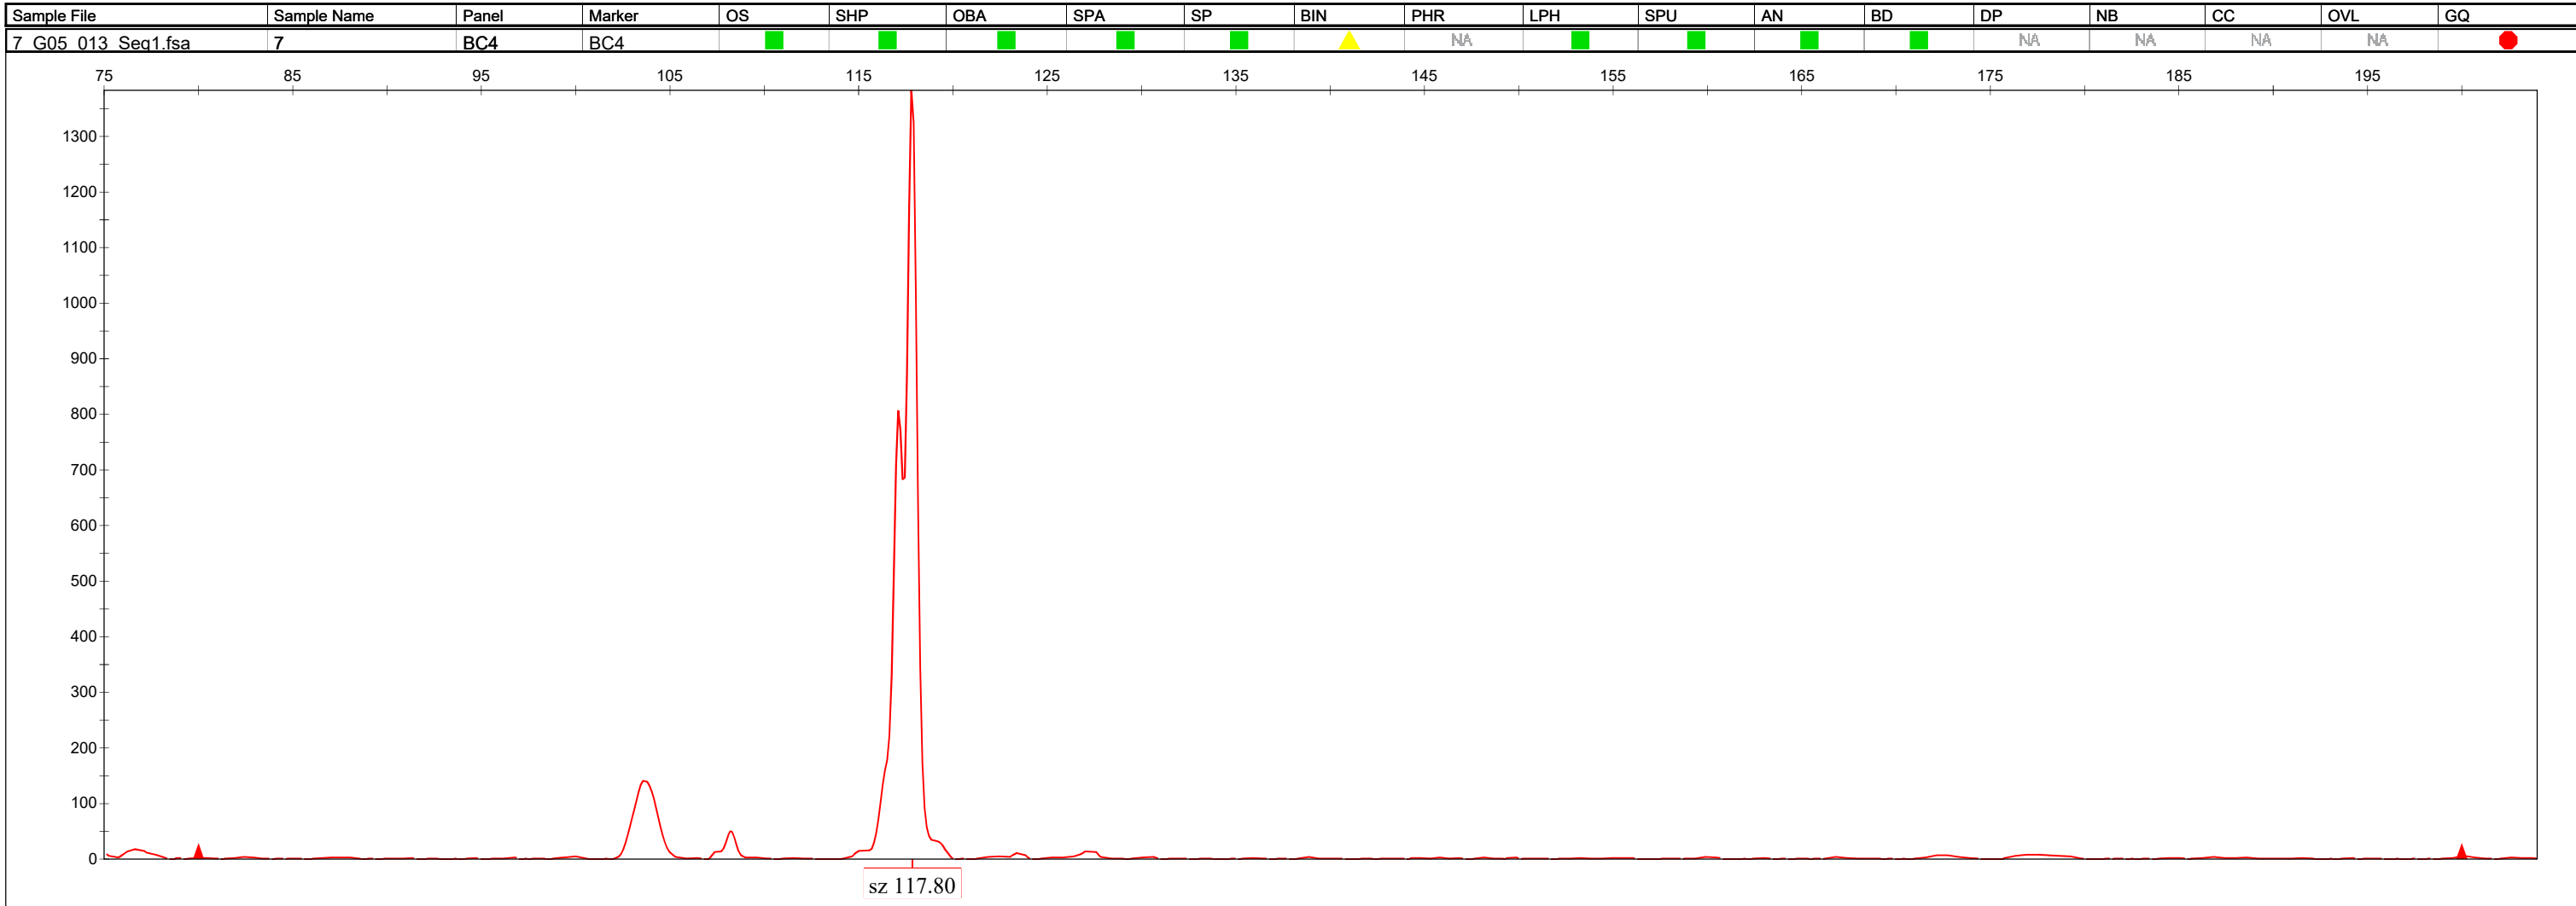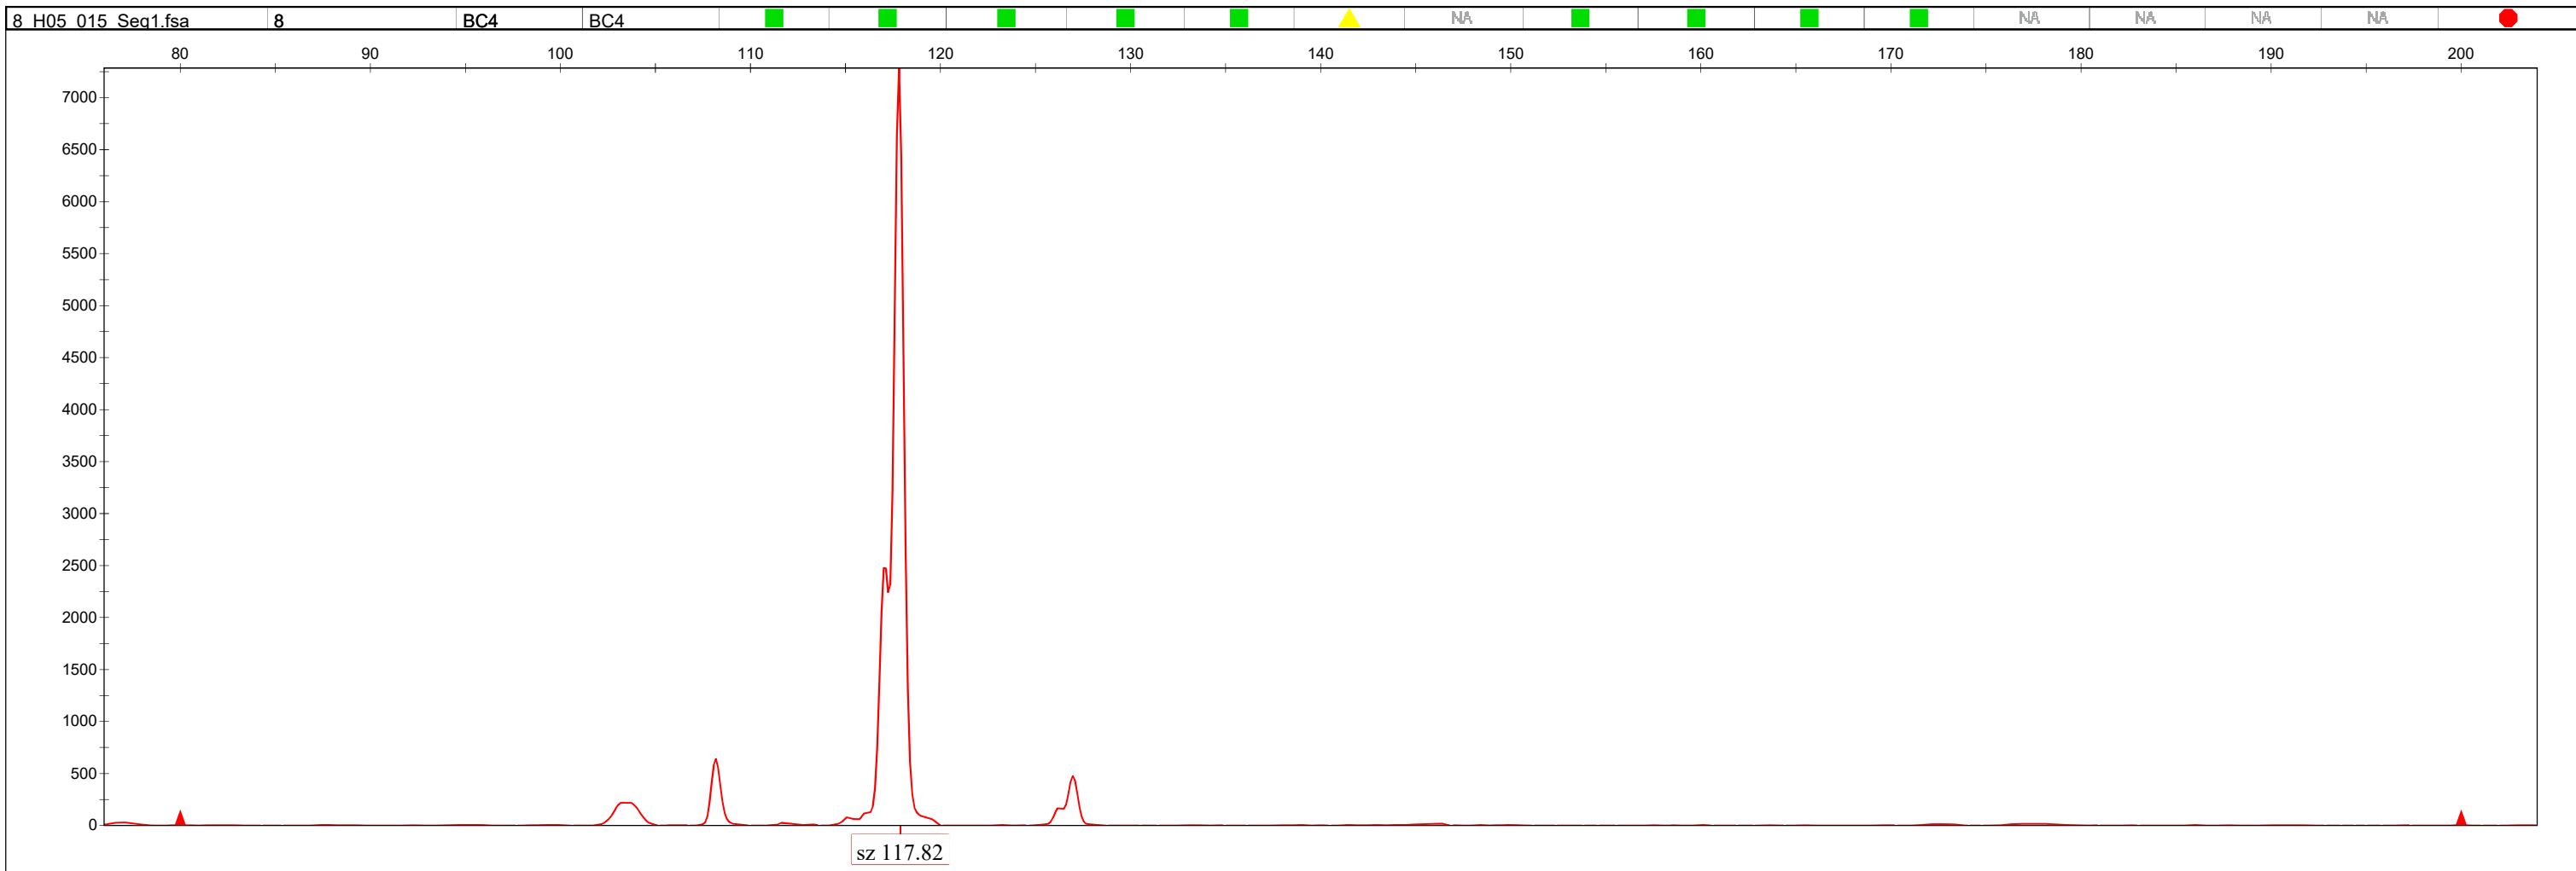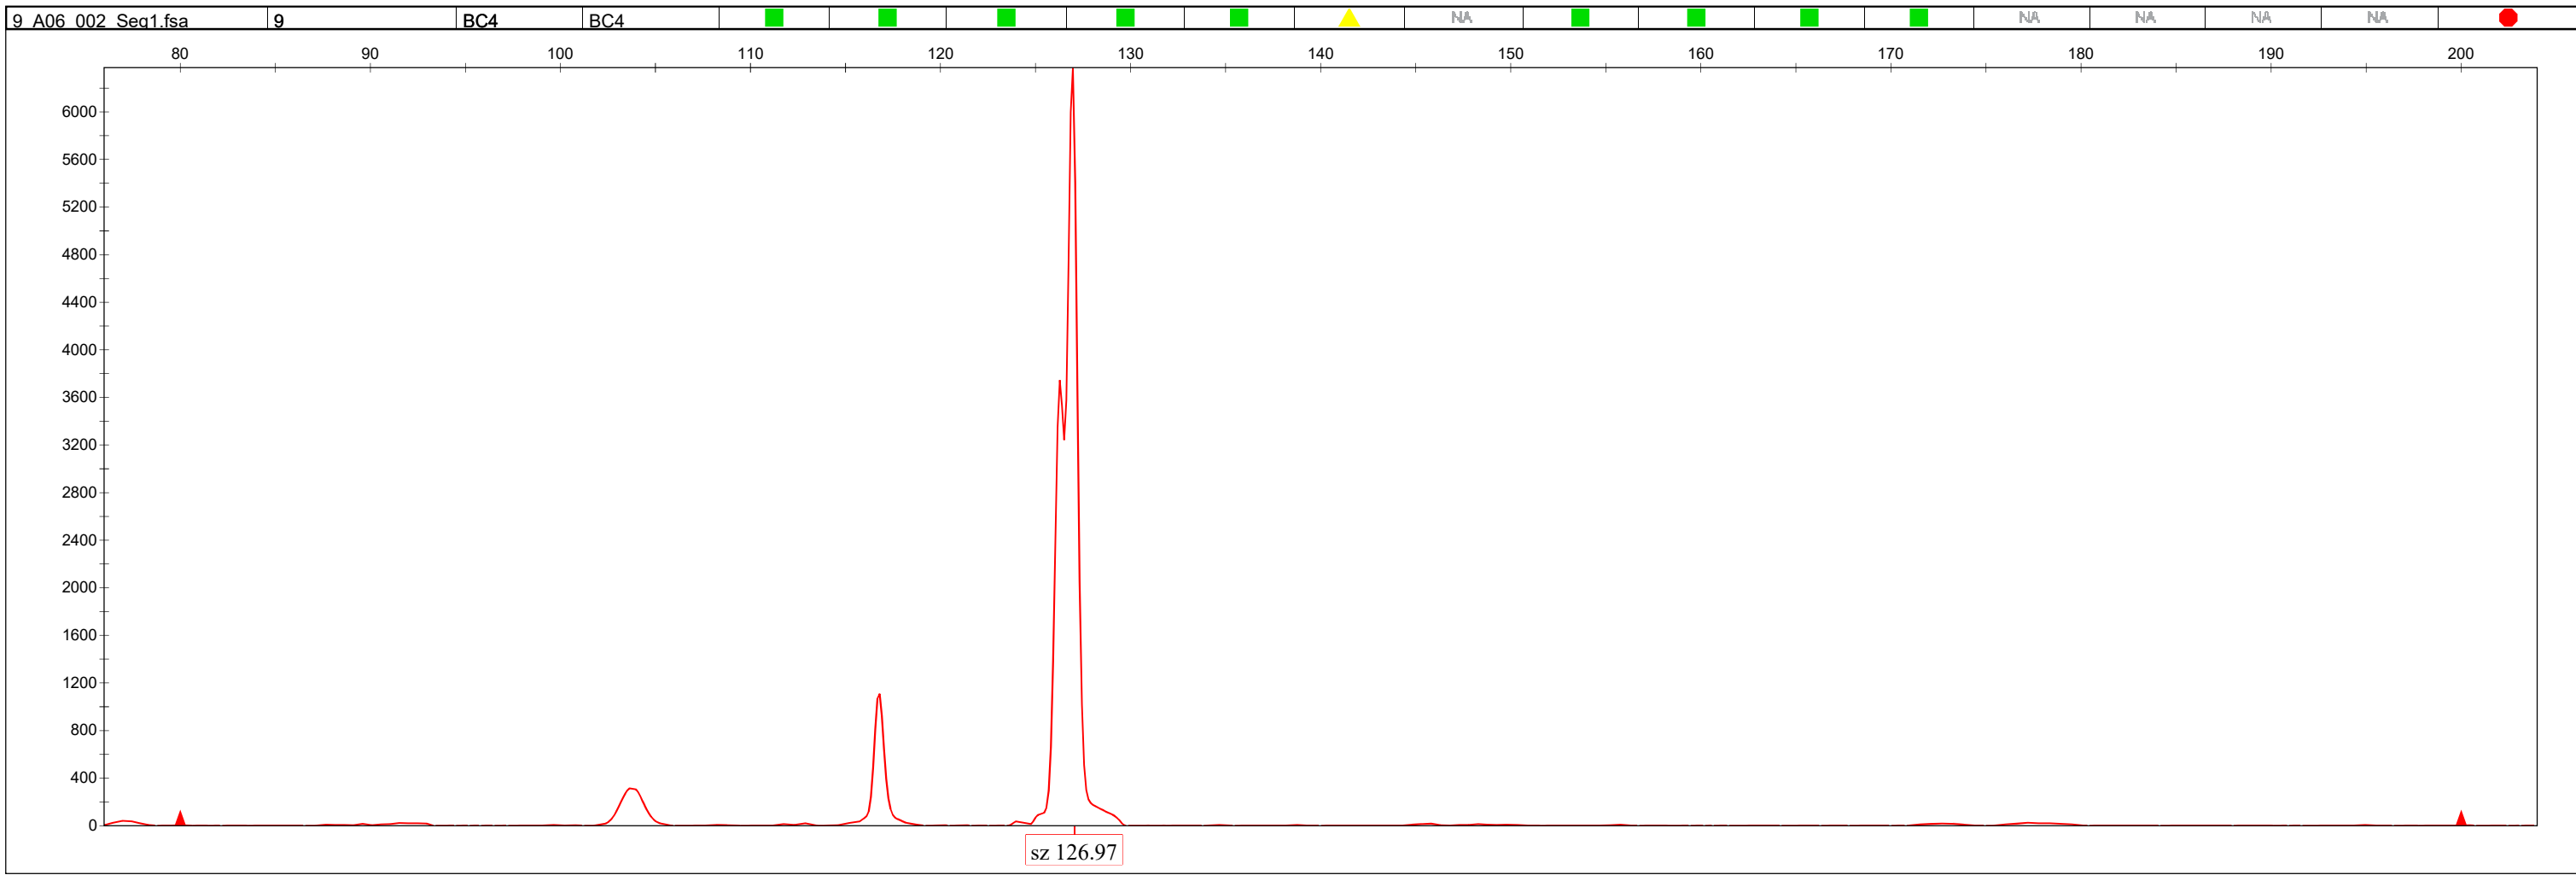

Supplement: s1 [file s1]

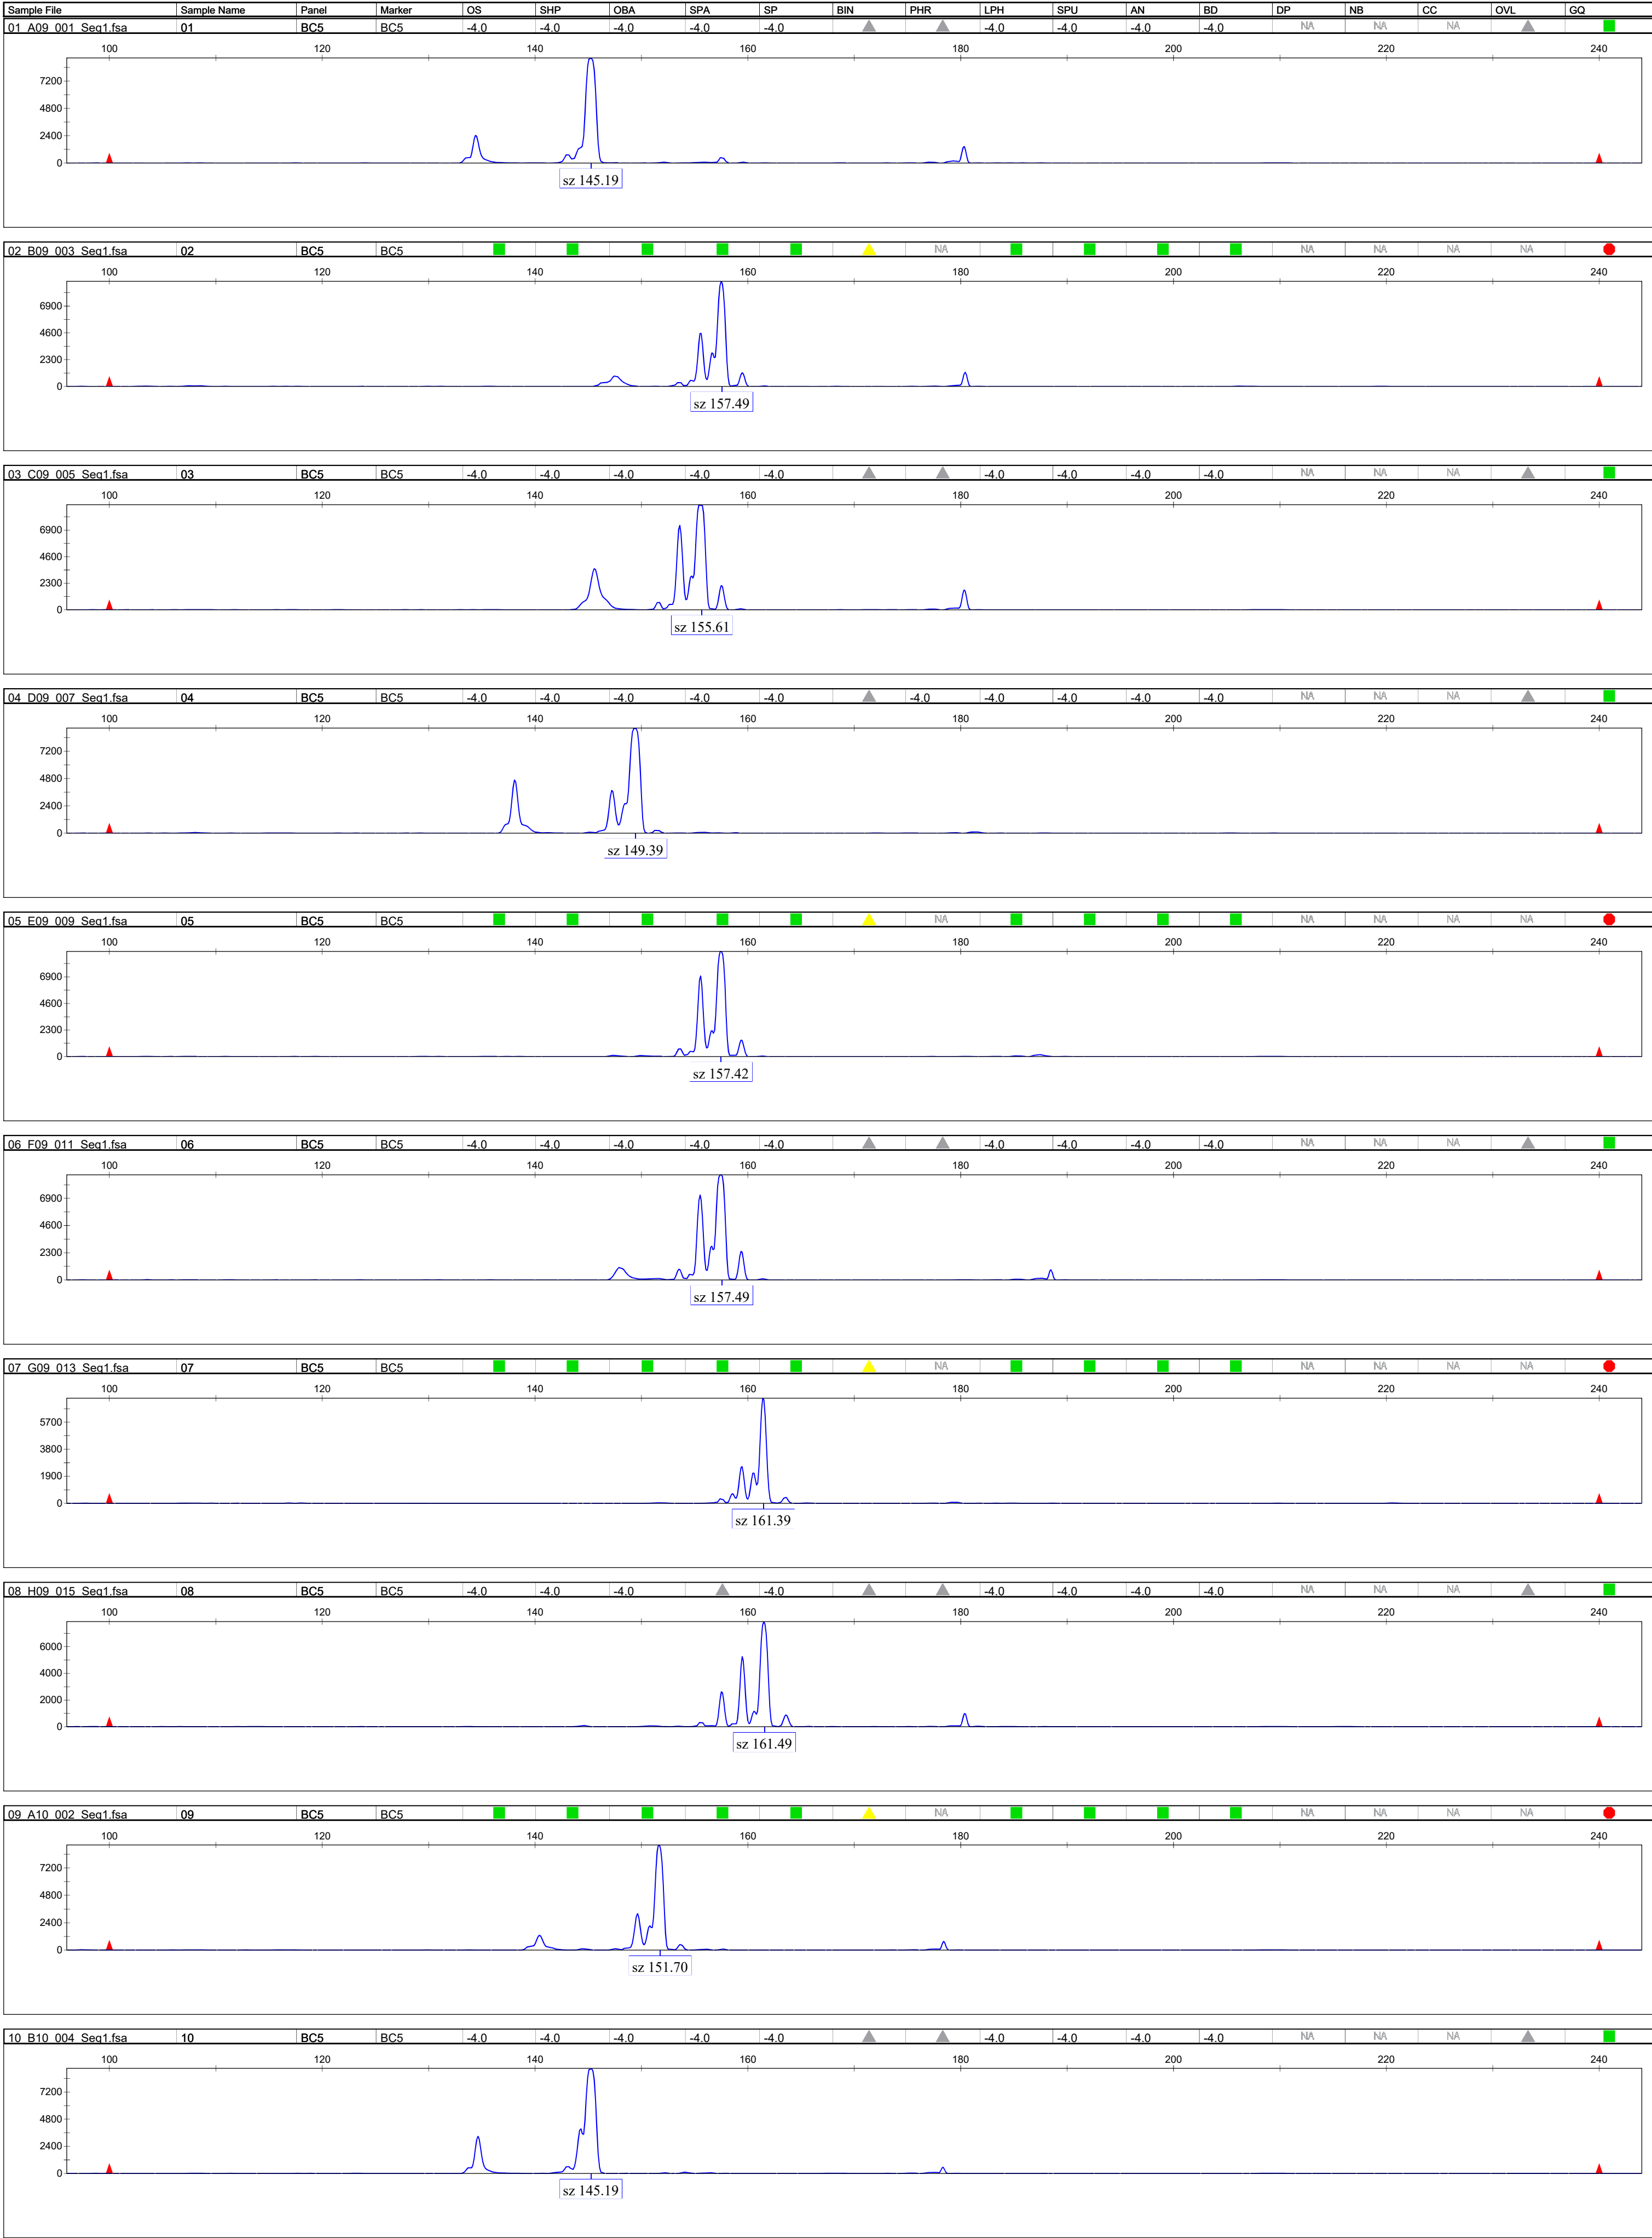

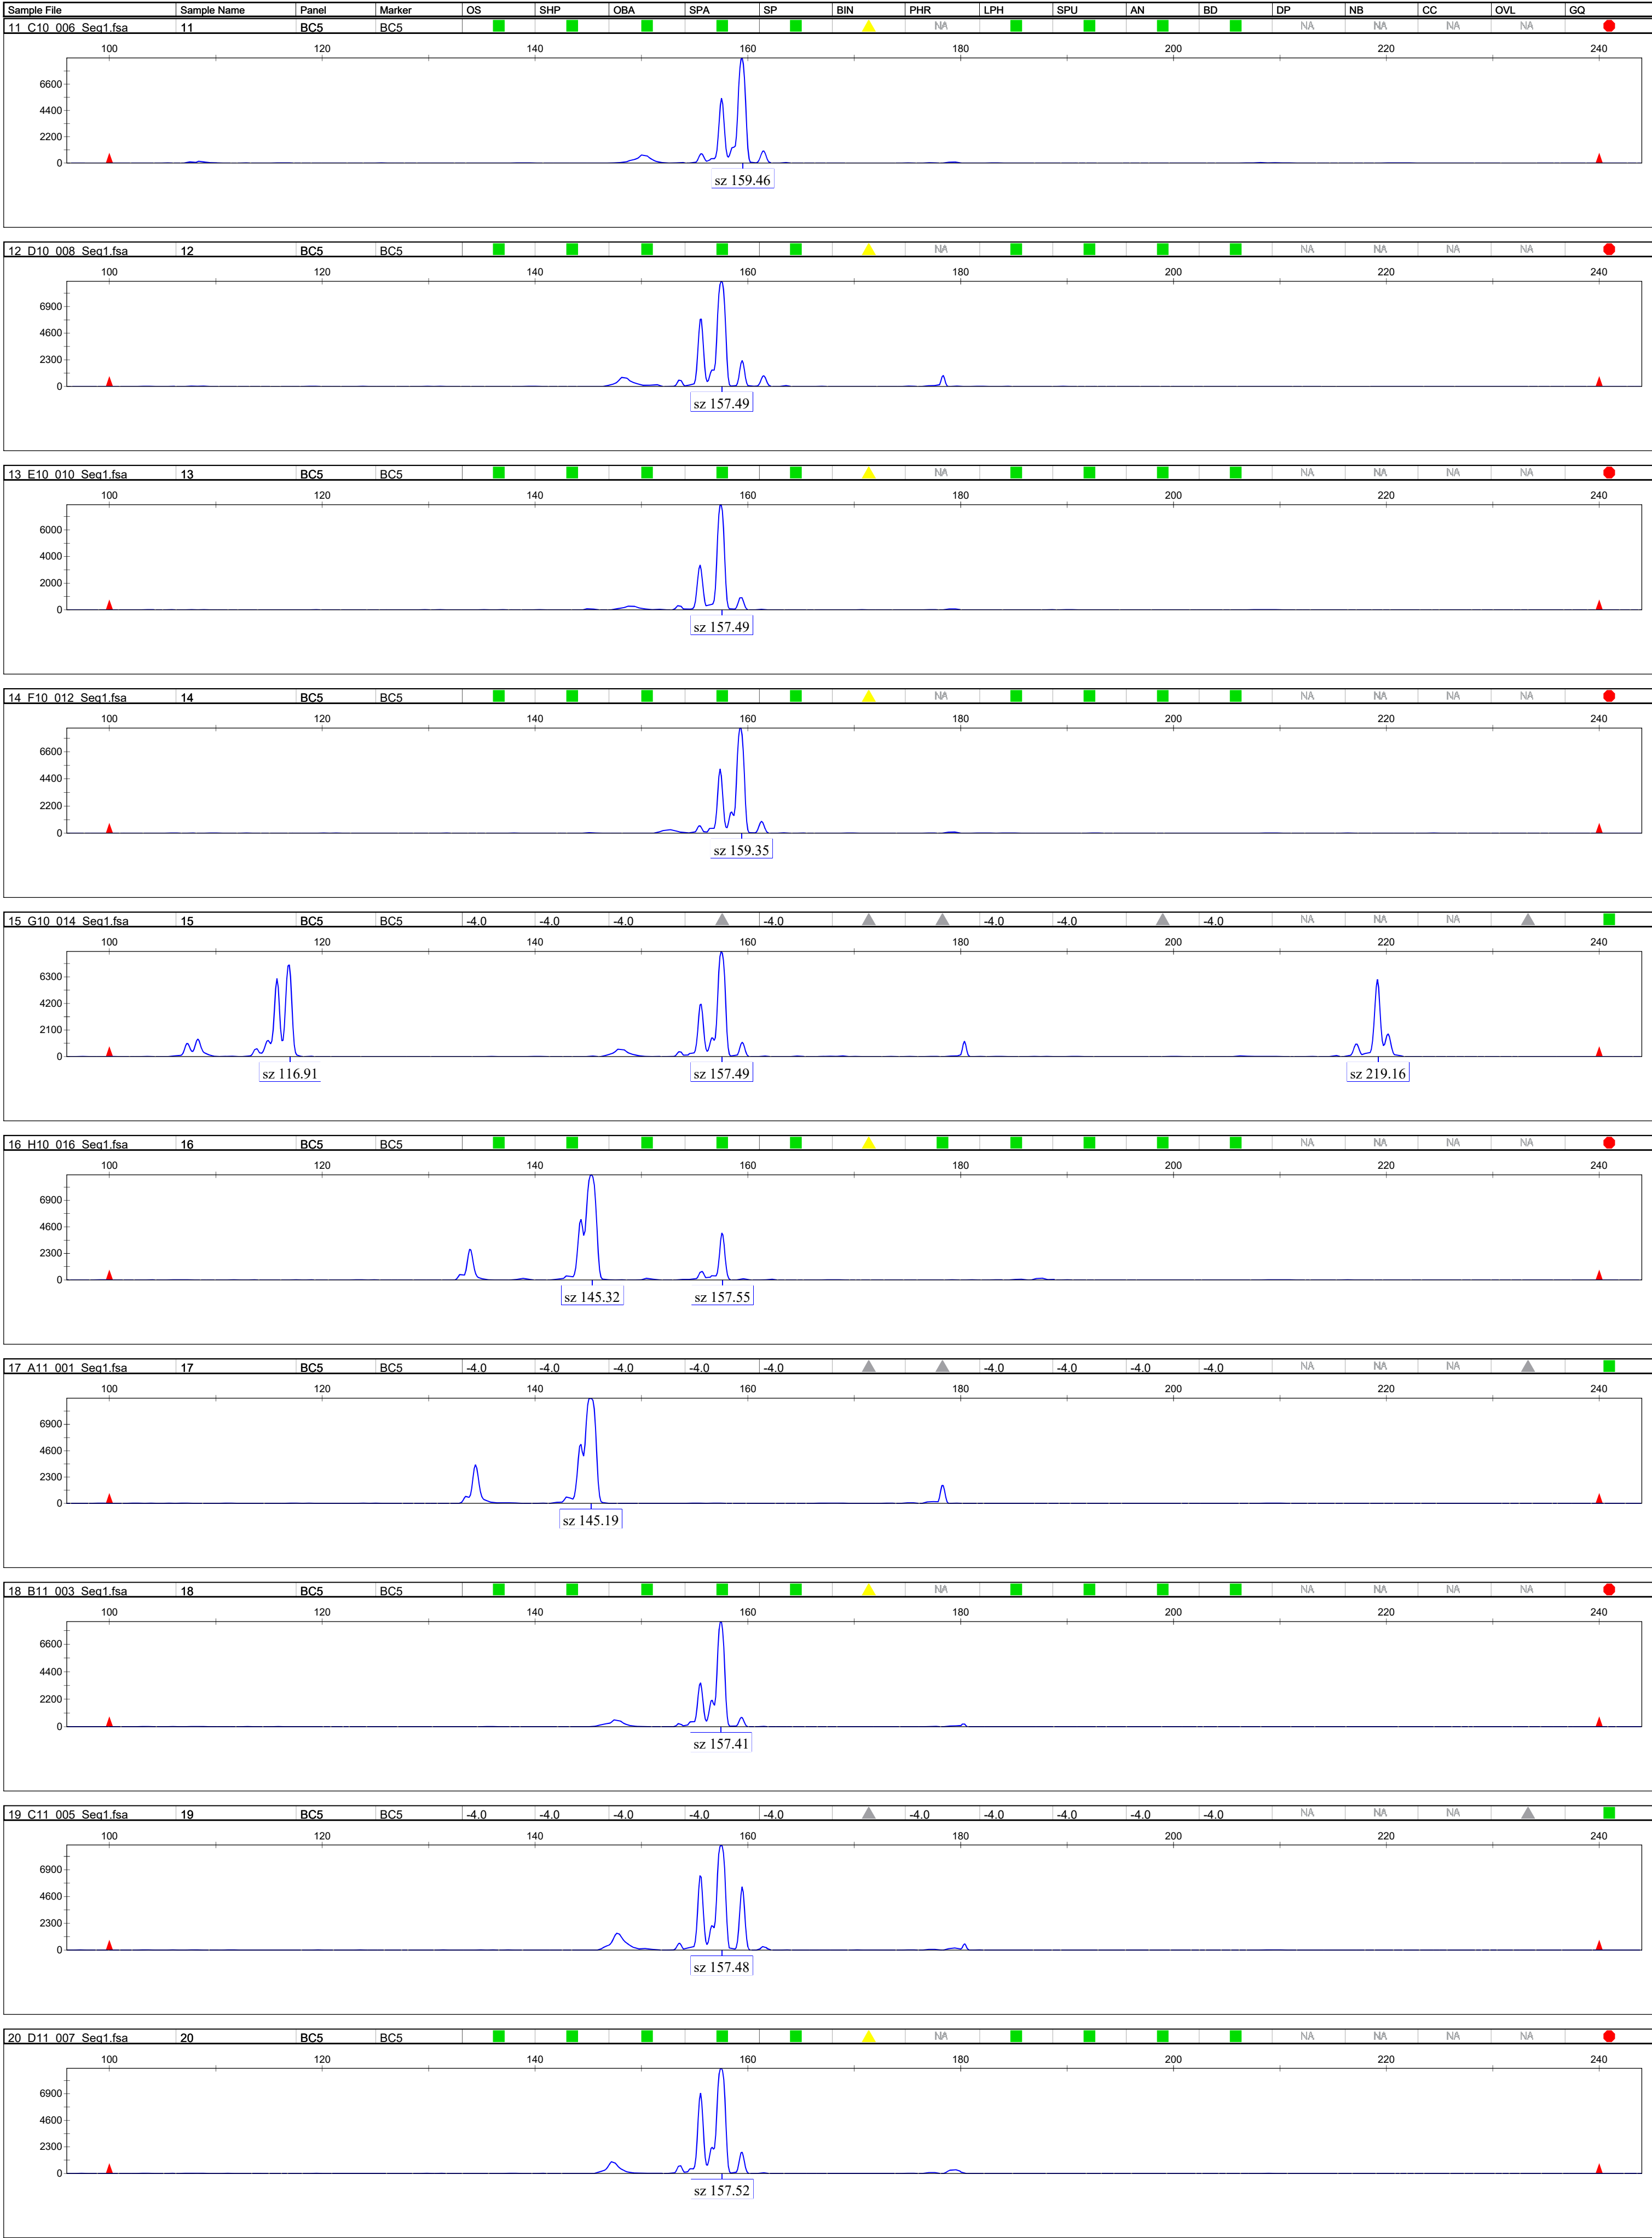

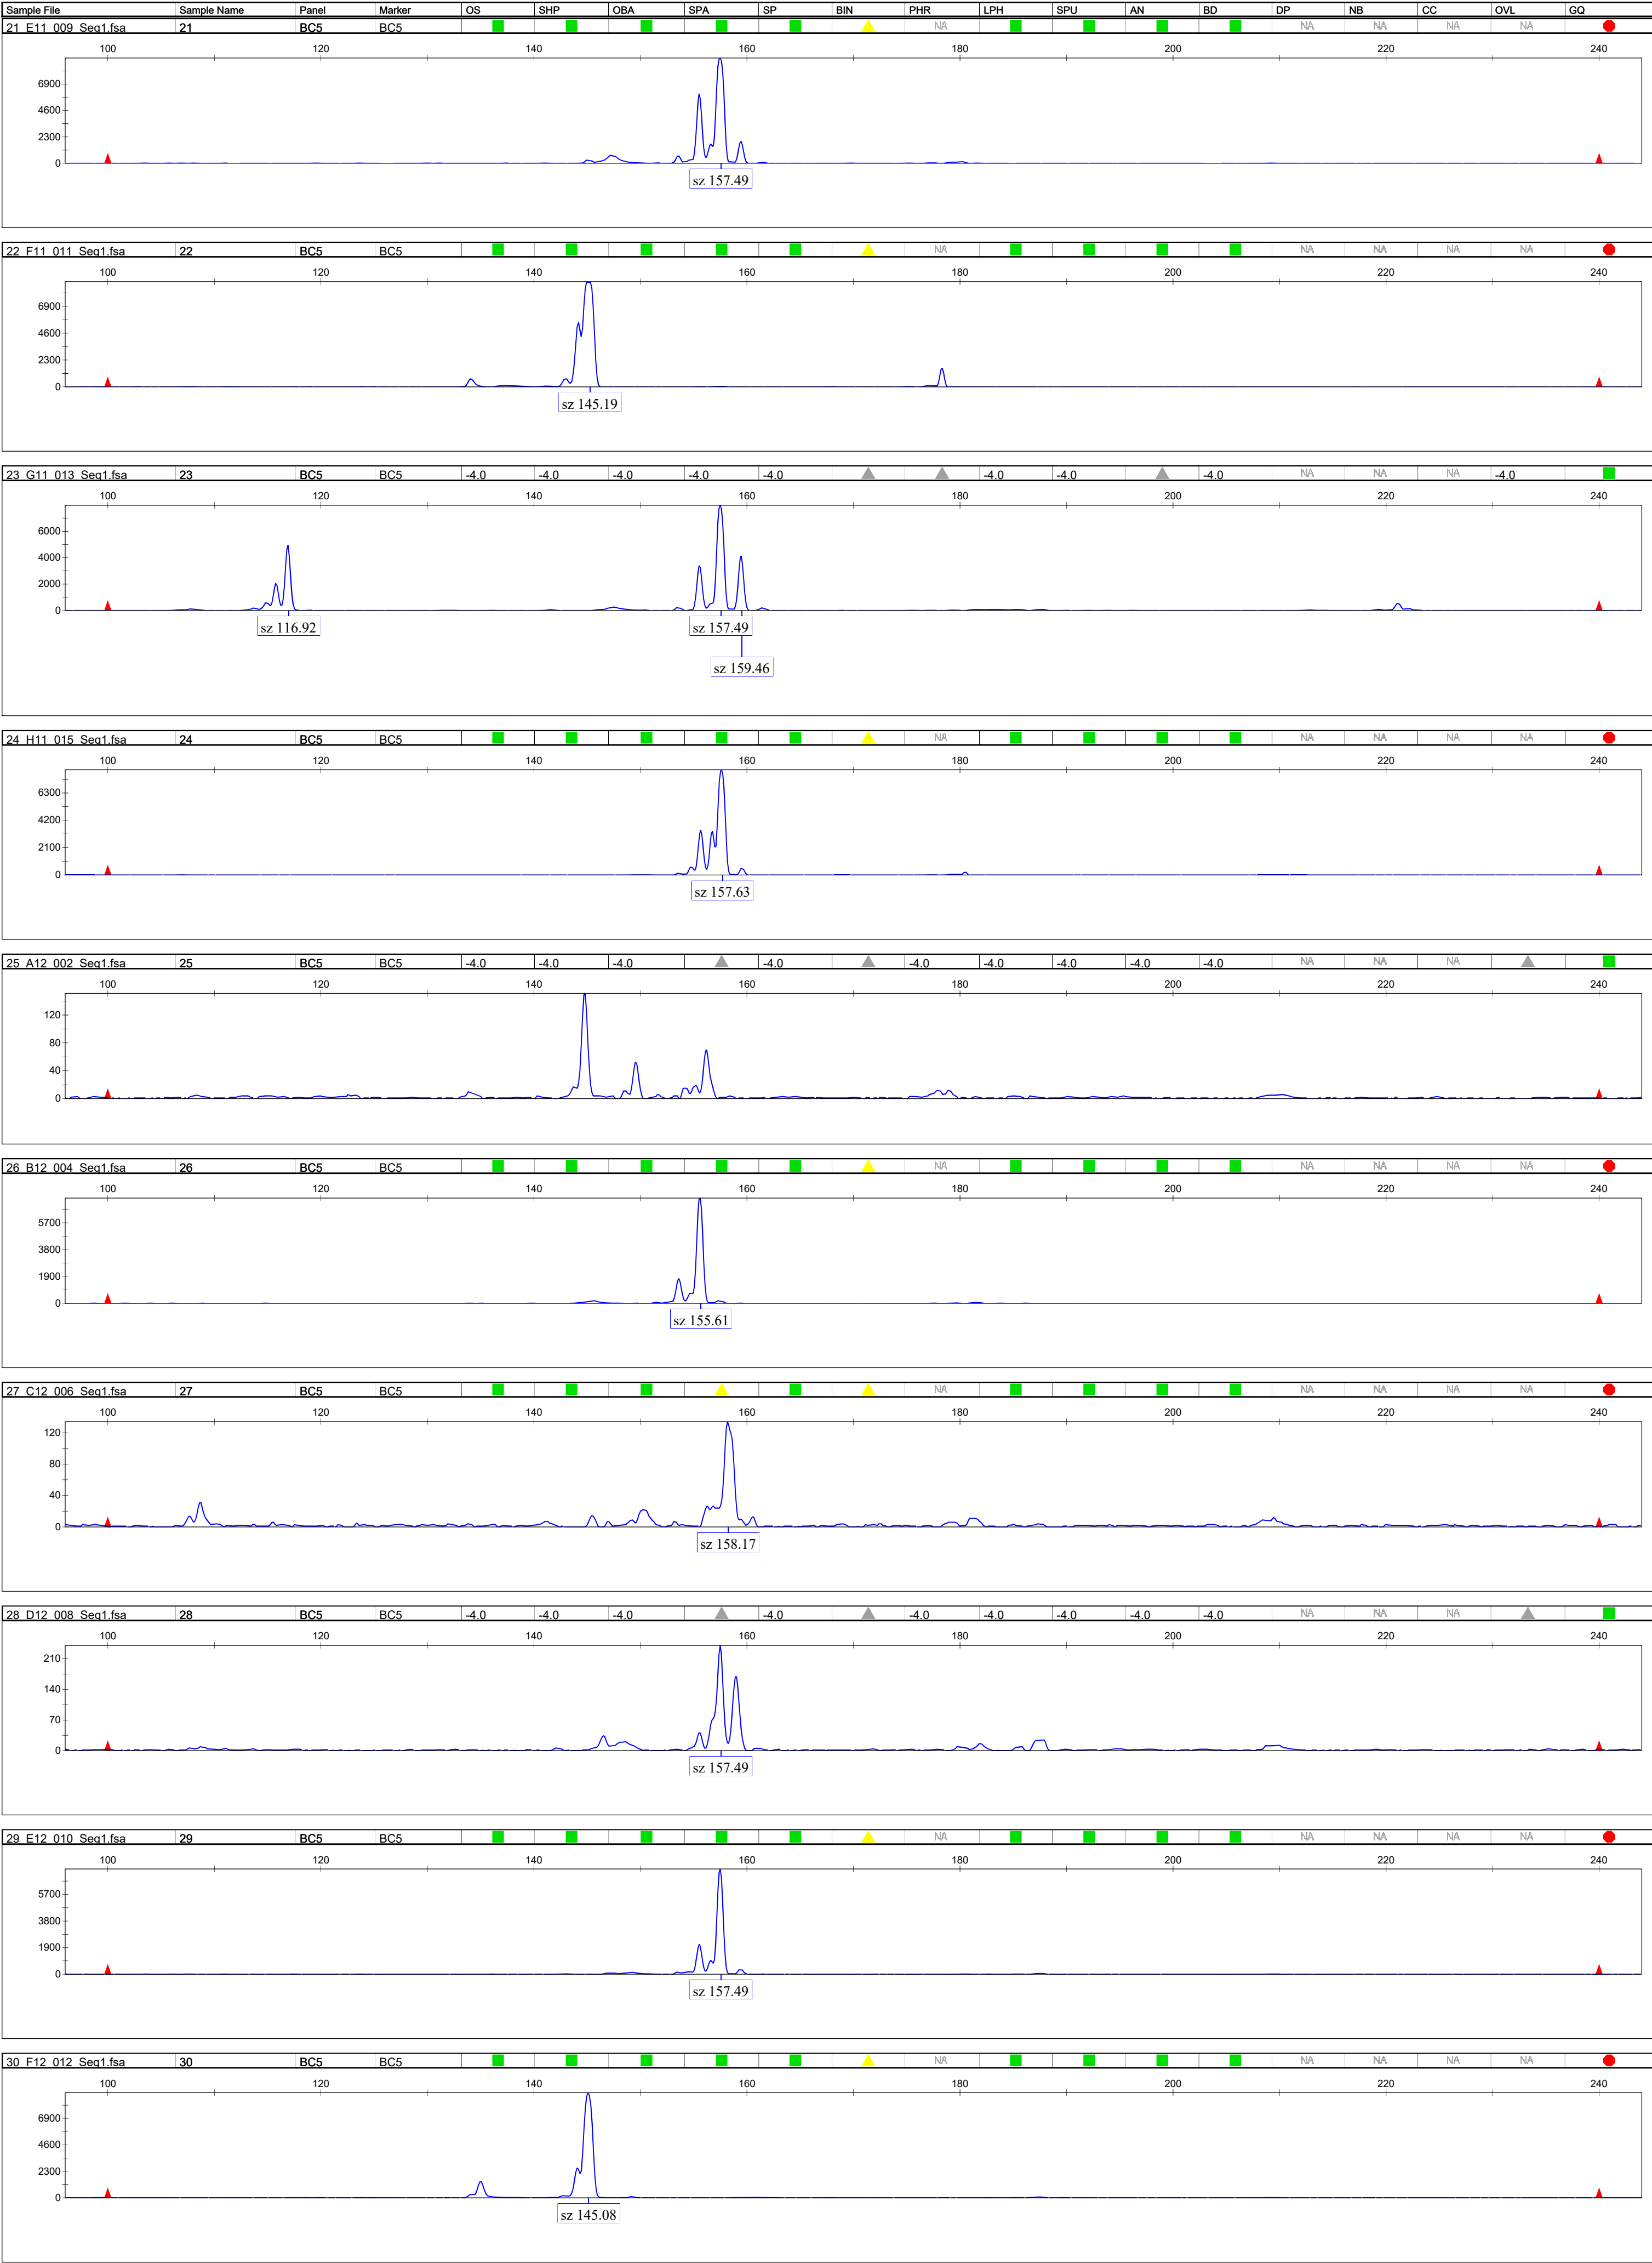

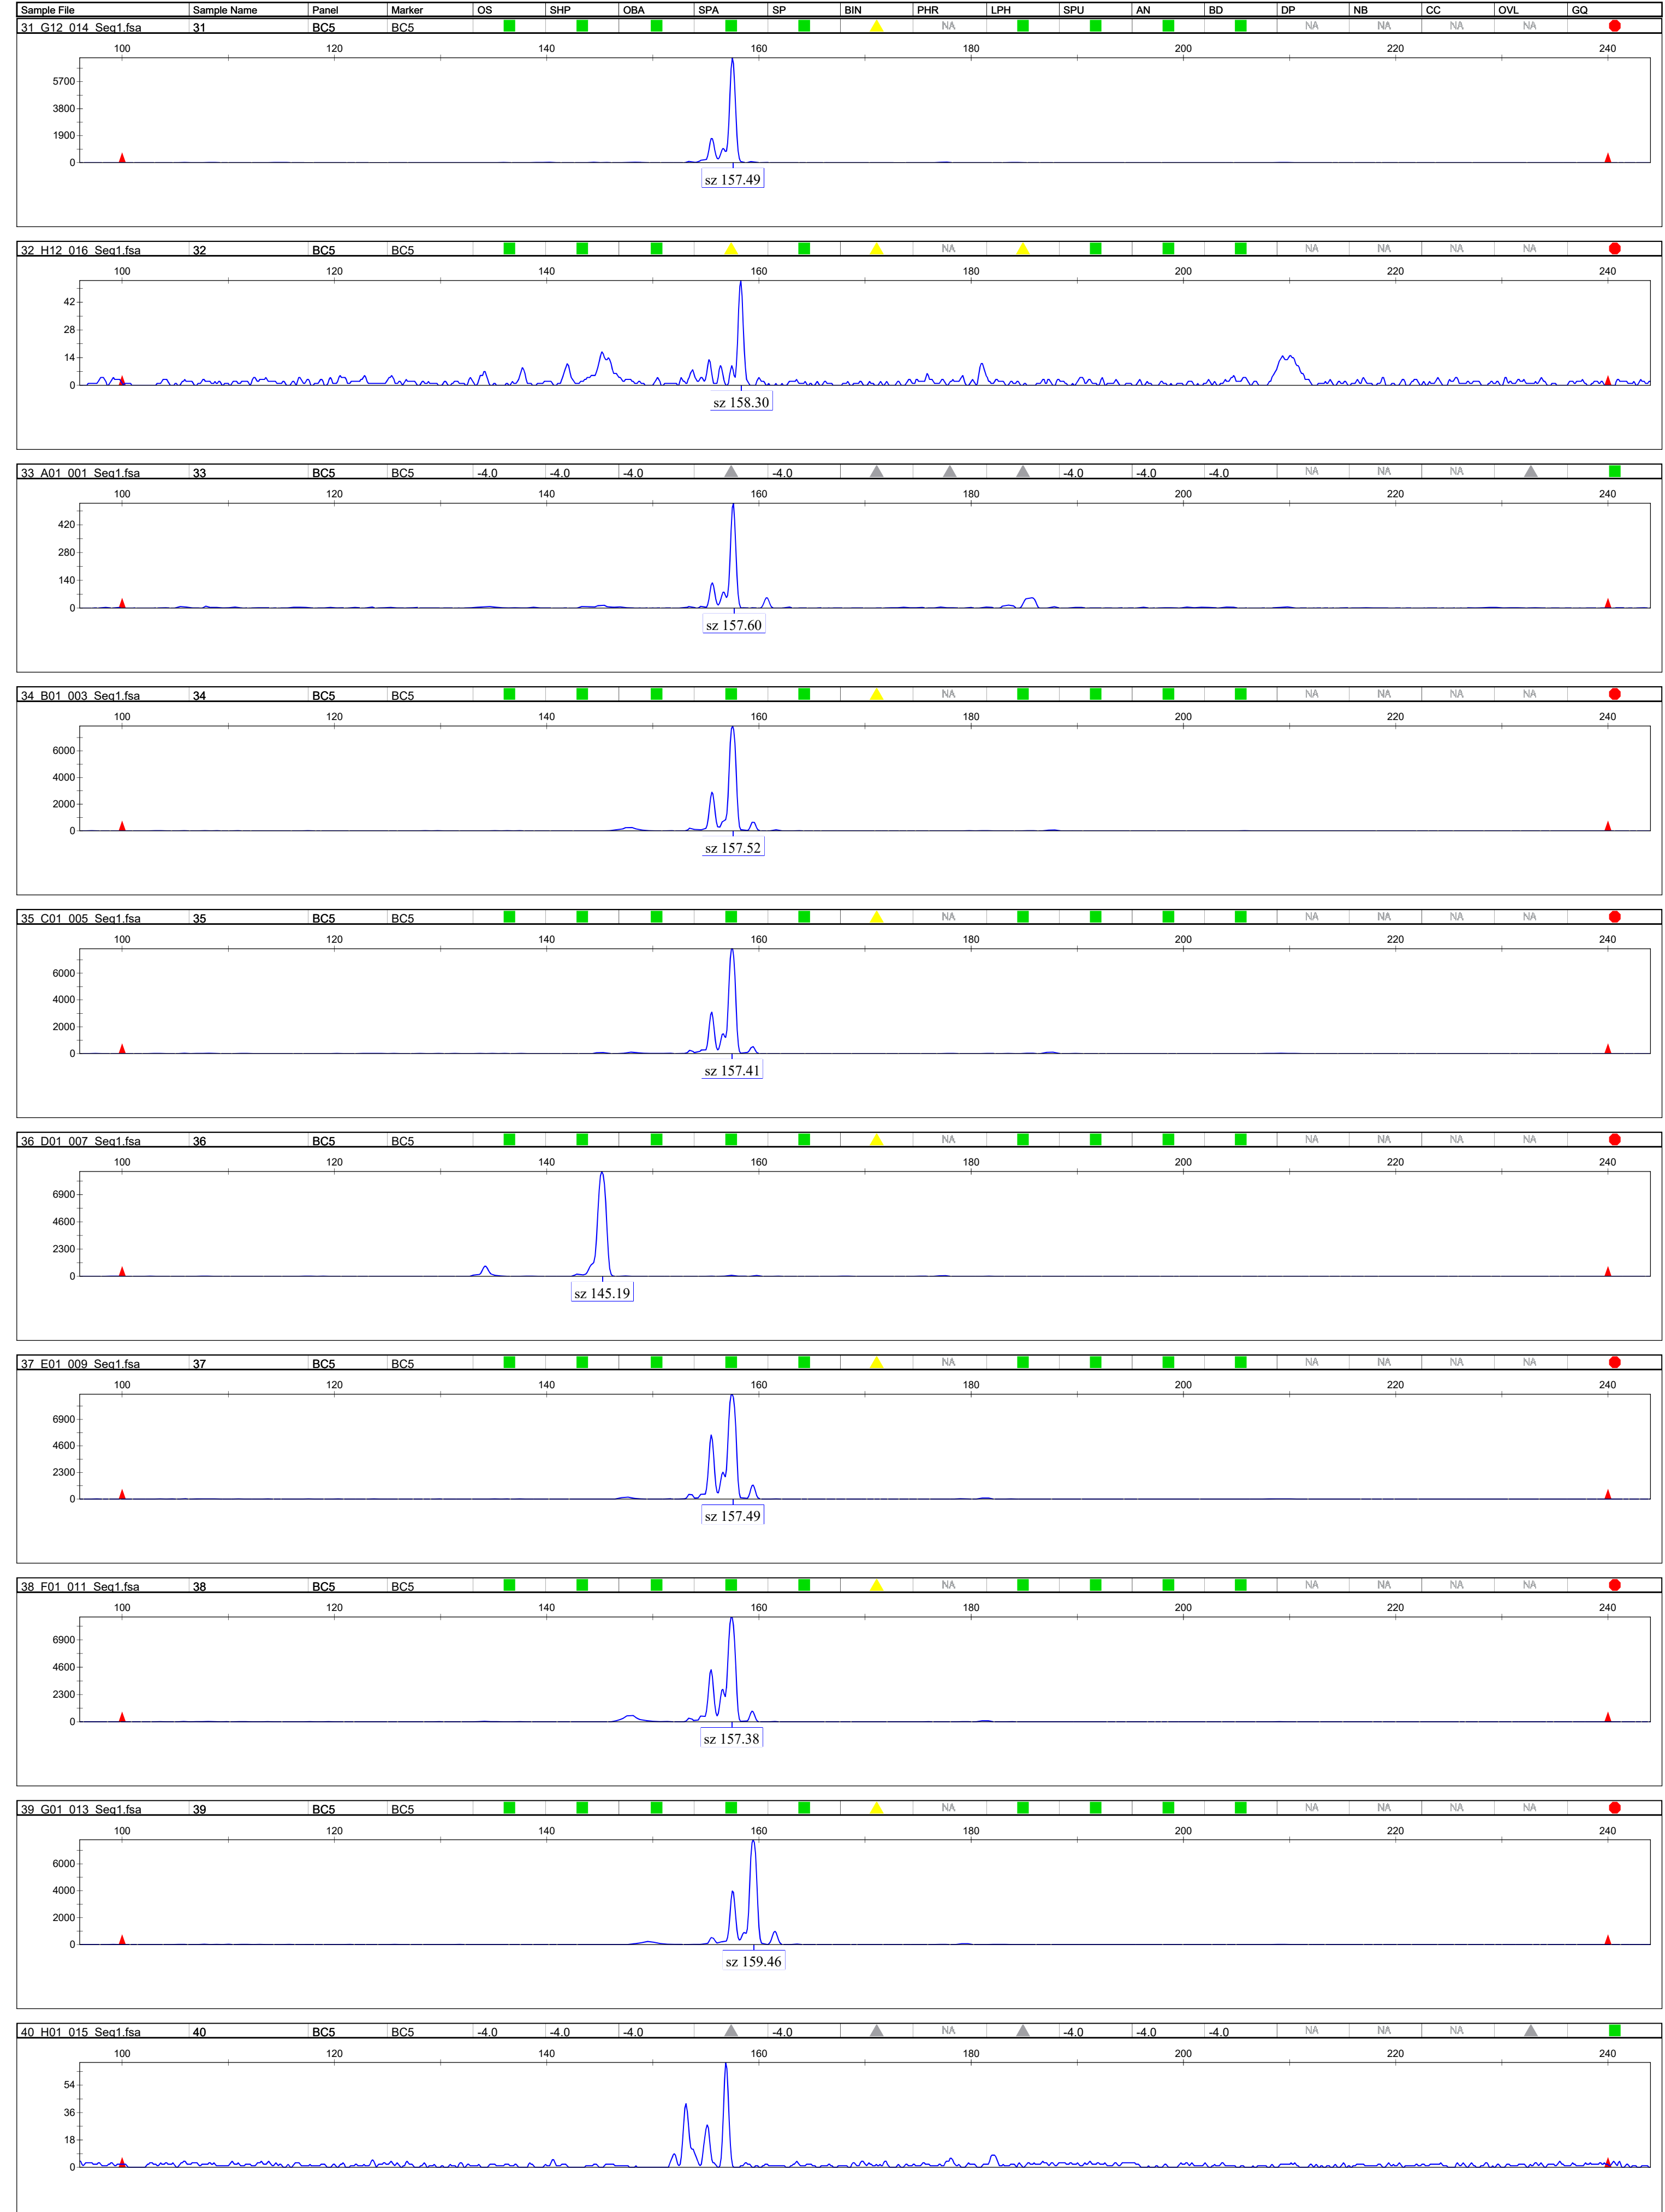

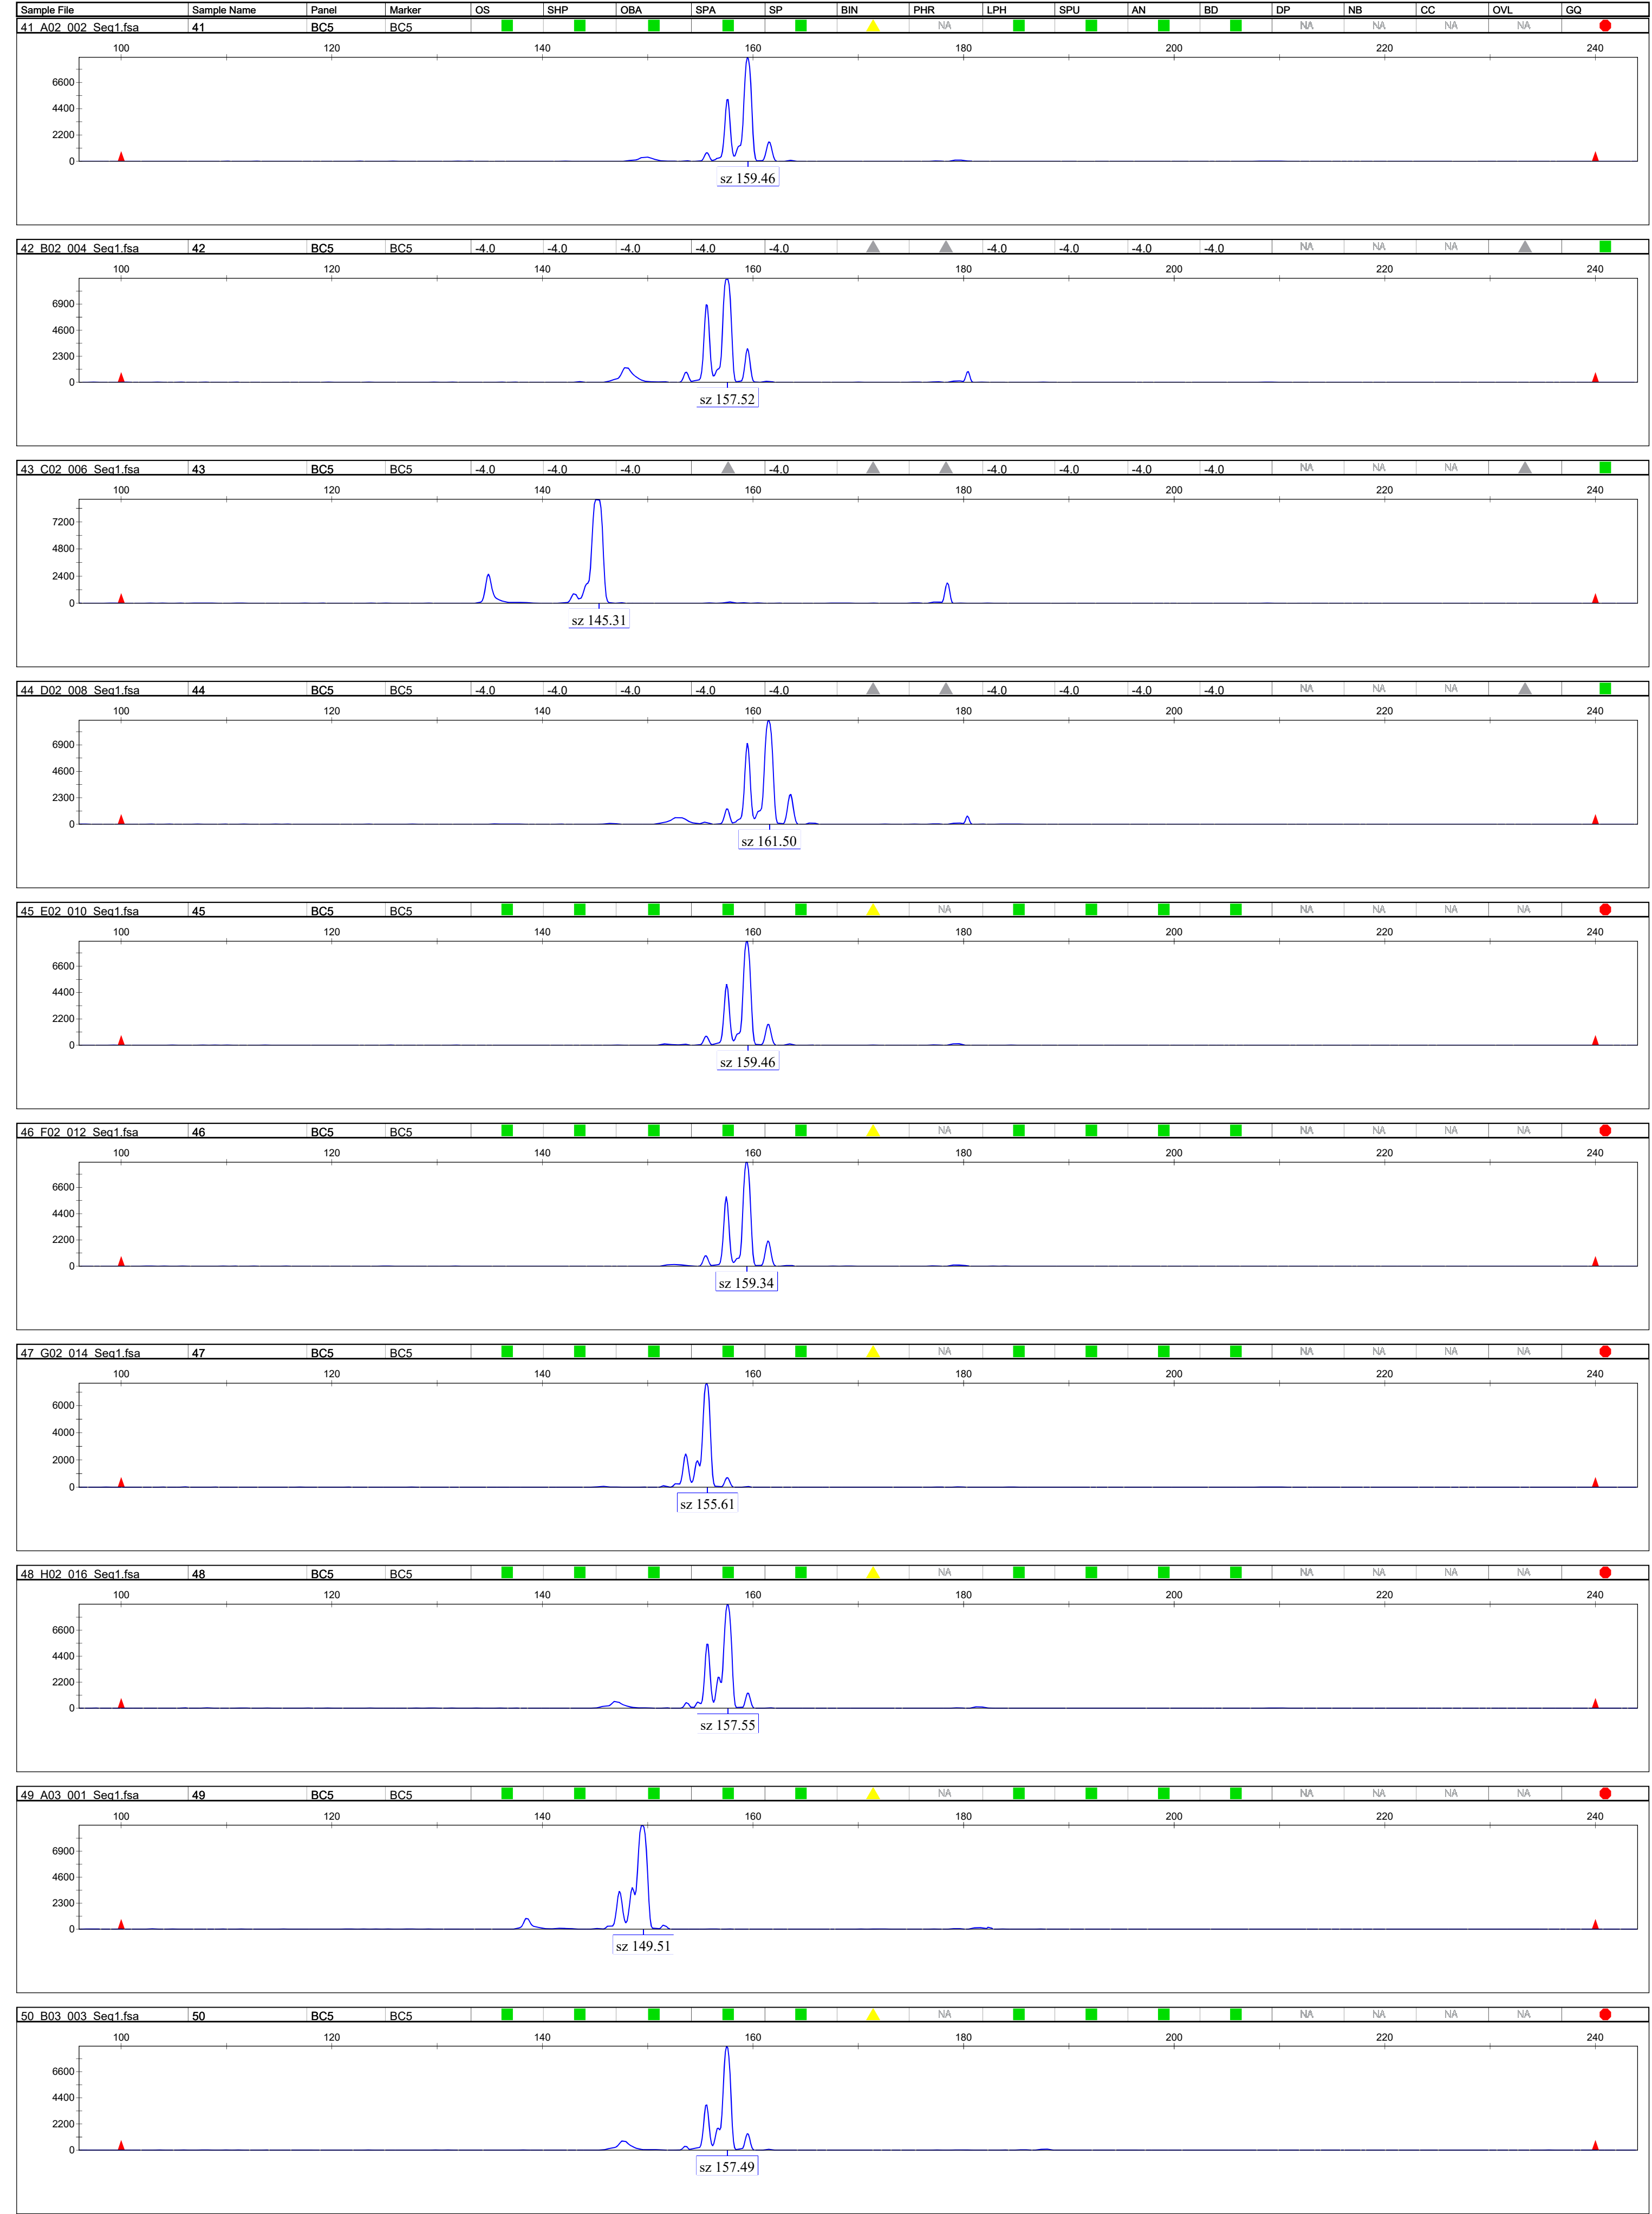

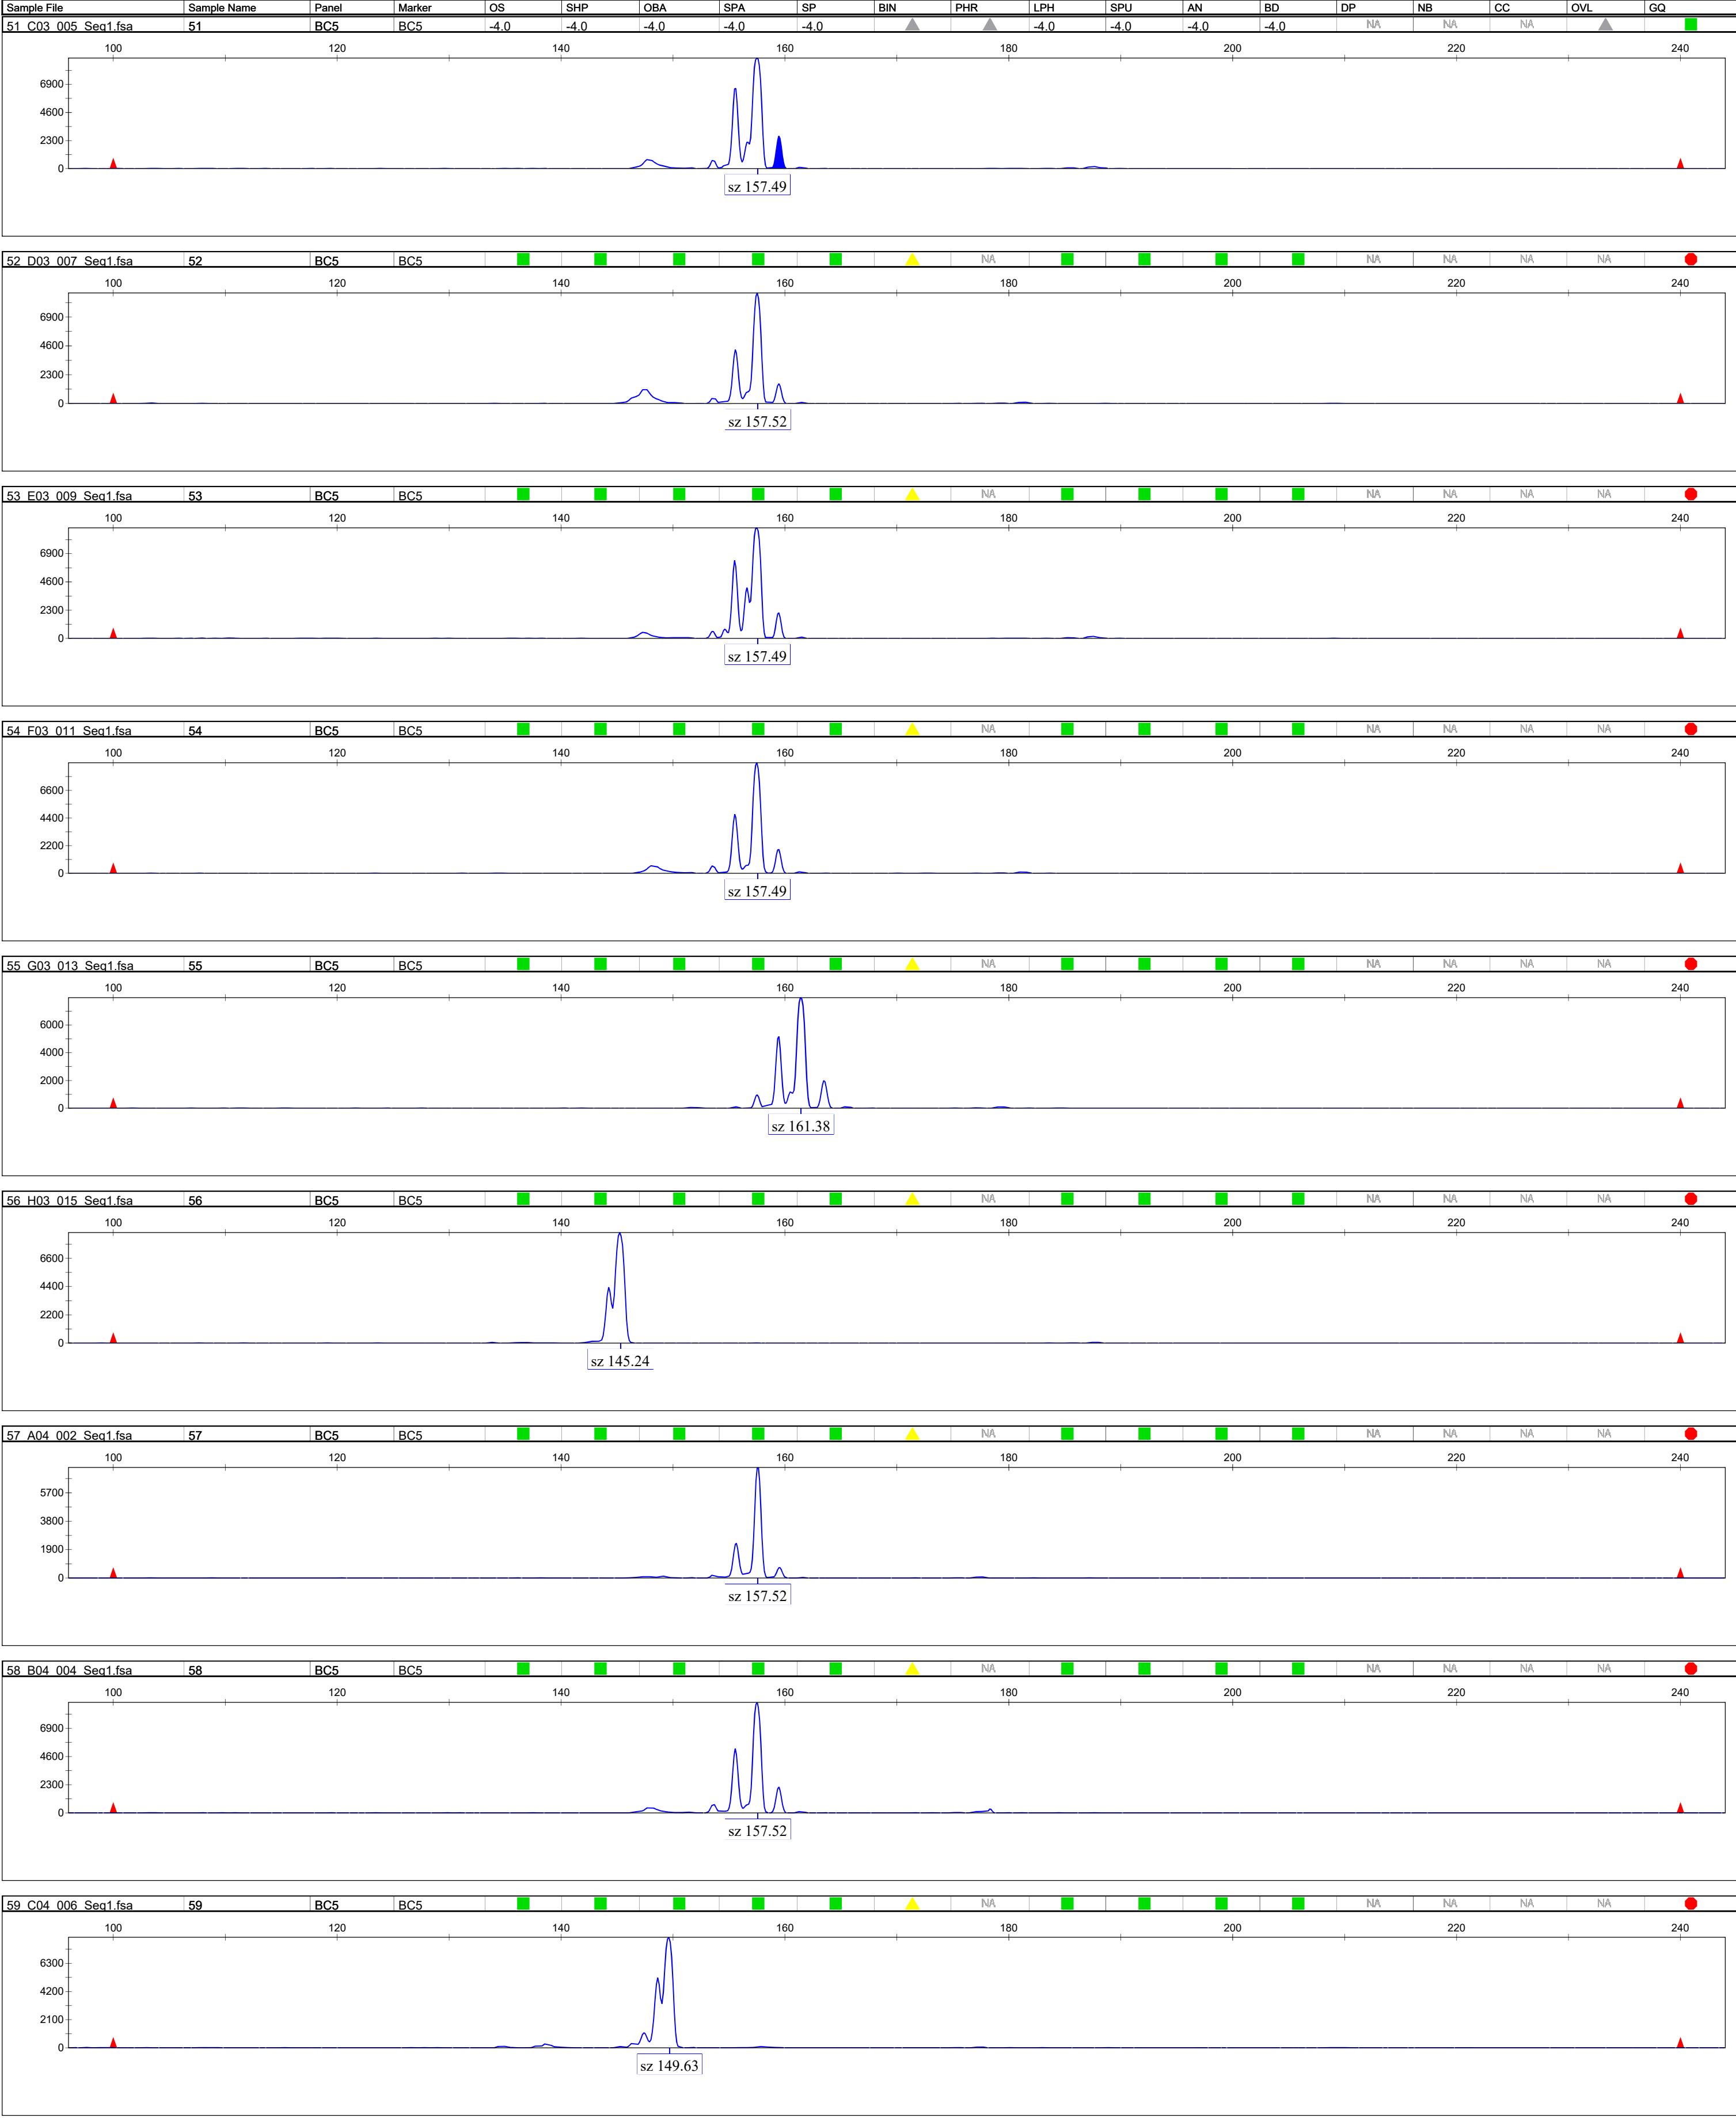

Supplement: s1 [file s1]
